# Supplementary material for: Endocytic trafficking determines cellular tolerance of presynaptic opioid signaling
Source: eLife. 2022 Nov 15;11:e81298. doi: 10.7554/eLife.81298 (PMC9708073; doi:10.7554/eLife.81298)
Supplement: Figure 1—source data 1. [file elife-81298-fig1-data1.xlsx]

## Sheet: PANEL C-E-F
PANEL C	ratios	MORC	MORA	MORD			ttest					PANEL D		MORDRDS		CNAA					PANEL E	ratios	CNAA	CNA2	CNA4	ratios	MORA	MOR1	MOR2	MOR4	MOR8	MORD
							MORC	MORA	8.58543e-12	***				1	2	1	2
		0.991628	0.30049	0.397738			MORA	MORD	5.10987e-07	***													0.52947	0.443817	0.593604		0.30049	0.247596	0.28218	0.40412	0.569881	0.397738
		0.830027	0.304386	0.473213			MORC	MORD	6.09758e-06	***													0.274564	0.327348	0.527853		0.304386	0.421564	0.312732	0.127321	0.412134	0.473213
		0.882153	0.465007	0.809701																			0.405969	0.412944	0.815221		0.465007	0.235968	0.356197	0.239815	0.411936	0.809701
		0.931923	0.176398	0.479961										0.656756	0.534681	0.52947	0.477754						0.224532	0.654524	0.29964		0.176398	0.216936	0.236911	0.342274	0.443897	0.479961
		0.959618	0.143182	0.618356										0.780479	0.649599	0.274564	0.348334						0.374143	0.50056	0.603796		0.143182	0.181648	0.357787	0.722516	0.0317203	0.618356
		0.826926	0.285835	0.551683										0.648536	0.541316	0.405969	0.312192						0.215944	0.611111	0.848883		0.285835	0.397126	0.484061	0.694527	0.796689	0.551683
			0.496858	0.782996										0.66909	0.798654	0.224532	0.176765						0.423118	0.562375			0.496858	0.815941	0.403405	0.363694	0.843831	0.782996
			0.341693	0.485587										0.588787	0.638641	0.374143	0.363226						0.339462				0.341693	0.312796	0.304246	0.450665	0.537221	0.485587
			0.461279	0.544917										0.693846	0.715962	0.215944	0.385525						0.291472				0.461279	0.359944	0.24905	0.513991	0.340549	0.544917
			0.245105	0.508751										0.761295	0.877823	0.423118	0.388241										0.245105	0.266212	0.277196	0.0420177		0.508751
			0.31897	0.401492										0.577279	0.569283	0.339462	0.538359										0.31897	0.304202		0.368668		0.401492
			0.237863	0.435273										0.573473	0.527591	0.291472	0.408617										0.237863					0.435273
			0.261793	0.498985										0.585518	0.565846												0.261793					0.498985
			0.0592234											0.413962	0.538036												0.0592234
			0.0445433											0.612909	0.549575												0.0445433
			0.155658																								0.155658
			0.207181																								0.207181
			0.236624																								0.236624
			0.17092																								0.17092			Acute	2	4
			0.180385											test paired	0.870037	ns	test paired	0.346475	ns								0.180385		unpaired ttests	0.0747889	0.00177923	0.0473086				ns		**	*
														av	36.9839	37.4416	av	65.7925	62.2332																	0	1	2	4	8	18
	in % inhib	MORC	MORA	MORD											MORDRDS			CNAA				% inhib	CNAA	CNA2	CNA4		MORA	MOR1	MOR2	MOR4	MOR8	MORD			MOR	74.533	65.8188	67.3623	61.1854	51.246	46.2411
		0.837226	69.951	60.2262											34.3244	46.5319		47.053	52.2246			av	65.7925	49.8189	38.5167		74.533	65.8188	67.3623	61.1854	51.246	46.2411
		16.9973	69.5614	52.6787											21.9521	35.0401		72.5436	65.1666			Sem	3.40845	4.38165	8.2142		2.75816	5.2557	2.39688	6.31442	8.11762	3.5992				0	2	4
		11.7847	53.4993	19.0299											35.1464	45.8684		59.4031	68.7808			n	9	7	6		20	11	10	11	9	13			CNA	65.7925	49.8189	38.5167
		6.80768	82.3602	52.0039											33.091	20.1346		77.5468	82.3235				47.053	55.6183	40.6396		69.951	75.2404	71.782	59.588	43.0119	60.2262
		4.03816	85.6818	38.1644											41.1213	36.1359		62.5857	63.6774				72.5436	67.2652	47.2147		69.5614	57.8436	68.7268	87.2679	58.7866	52.6787
		17.3074	71.4165	44.8317			***		***						30.6154	28.4038		78.4056	61.4475				59.4031	58.7056	18.4779		53.4993	76.4032	64.3803	76.0185	58.8064	19.0299
			50.3142	21.7004											23.8705	12.2177		57.6882	61.1759				77.5468	34.5476	70.036		82.3602	78.3064	76.3089	65.7726	55.6103	52.0039
			65.8307	51.4413											42.2721	43.0717		66.0538	46.1641				62.5857	49.944	39.6204		85.6818	81.8352	64.2213	27.7484	96.828	38.1644
			53.8721	45.5083											42.6527	47.2409		70.8528	59.1383				78.4056	38.8889	15.1117		71.4165	60.2874	51.5939	30.5473	20.3311	44.8317
			75.4895	49.1249											41.4482	43.4154							57.6882	43.7625			50.3142	18.4059	59.6595	63.6306	15.6169	21.7004
			68.103	59.8508											58.6038	46.1964							66.0538				65.8307	68.7204	69.5754	54.9335	46.2779	51.4413
			76.2137	56.4727											38.7091	45.0425							70.8528				53.8721	64.0056	75.095	48.6009	65.9451	45.5083
			73.8207	50.1015																							75.4895	73.3788	72.2804	95.7982		49.1249
			94.0777																								68.103	69.5798		63.1332		59.8508
			95.5457																								76.2137					56.4727
			84.4342																								73.8207					50.1015
			79.2819																								94.0777
			76.3376																								95.5457
			82.908																								84.4342
			81.9615																								79.2819
																											76.3376
																											82.908
																											81.9615
	Av	9.62875	74.533	46.2411
	sem	2.79529	2.75816	3.5992
Insets
Control	-58	-57	-56	-55	-54	-53	-52	-51	-50	-49	-48	-47	-46	-45	-44	-43	-42	-41	-40	-39	-38	-37	-36	-35	-34	-33	-32	-31	-30	-29	-28	-27	-26	-25	-24	-23	-22	-21	-20	-19	-18	-17	-16	-15	-14	-13	-12	-11	-10
Av Baseline	0.0178432	0.0144573	0.010034	-0.00105233	0.00549207	0.00389617	0.00704146	0.00876785	0.00405312	0.0077502	0.0042088	0.00533138	0.00461007	0.00648965	0.00596903	0.00458707	0.00328748	0.00362149	0.0040796	0.0025314	0.00338426	0.00214126	0.00364707	0.00723074	0.00380284	0.00527455	0.00032296	0.00349381	0.00436792	-0.0045417	0.00239143	0.00239696	0.00477765	0.00344113	-0.00899132	0.00244177	0.00220567	-0.000198696	-0.00332754	0.0024821	0.00185543	0.0018273	-0.00350631	0.000421167	0.00101254	-0.00147371	0.00361391	0.00409565	0.000431955
sem baseline	0.00179446	0.00178796	0.00160011	0.00176837	0.00160681	0.00157601	0.00153199	0.00146522	0.00151473	0.00148888	0.00148662	0.00145351	0.00140568	0.00136963	0.00140594	0.00135249	0.00134873	0.00133141	0.00130703	0.00131864	0.00126333	0.0012839	0.00136754	0.00123781	0.00122789	0.00123603	0.00125314	0.00118085	0.00120225	0.00116619	0.00106737	0.00109153	0.00103888	0.00106812	0.00102374	0.00102526	0.00101855	0.000939816	0.000948862	0.000927853	0.000889895	0.000839887	0.000862749	0.000840157	0.000765321	0.000752452	0.000767627	0.00077036	0.000791071
Av control	0.073076	0.0407037	0.041595	0.0315899	0.0240817	0.0277318	0.0212816	0.0196949	0.0148916	0.00947946	0.0128793	0.015387	0.0100507	0.00624314	0.00758621	0.00898137	-0.0179545	0.00503866	0.00511414	0.00442513	0.00397317	0.00701565	0.00678087	0.00445413	0.00745422	0.00503989	0.00333358	0.00178072	0.00179868	0.00372169	0.00399274	0.00882168	0.00475859	0.000405638	0.00672781	0.000632477	0.00183669	0.0024862	0.00223316	0.00463233	0.00337049	0.00144929	-0.000609307	0.00129998	-0.00142891	0.00196162	0.00405551	-0.00292403	6.63782e-05
sem control	0.00182917	0.00205618	0.00177425	0.00173484	0.00178145	0.00177695	0.00173516	0.00169285	0.00165331	0.0012727	0.00123383	0.00159242	0.00109594	0.00113905	0.00110538	0.00105147	0.00166465	0.00103562	0.00112432	0.0010582	0.00105069	0.00109638	0.000954127	0.00112958	0.00098123	0.00112975	0.000970977	0.000946038	0.00105834	0.000993467	0.00101344	0.00100002	0.000957431	0.0009498	0.000980335	0.000948562	0.000942022	0.00101199	0.000890385	0.000916763	0.000828652	0.000963847	0.000840277	0.000997053	0.00107082	0.000986481	0.000782028	0.000826508	0.000793566
Acute	-58	-57	-56	-55	-54	-53	-52	-51	-50	-49	-48	-47	-46	-45	-44	-43	-42	-41	-40	-39	-38	-37	-36	-35	-34	-33	-32	-31	-30	-29	-28	-27	-26	-25	-24	-23	-22	-21	-20	-19	-18	-17	-16	-15	-14	-13	-12	-11	-10
Av Baseline	0.0137558	0.0092268	0.0101471	0.0112038	0.00628226	0.00790946	0.00604682	-0.00226664	0.00828759	0.00833687	0.00616603	0.00268882	0.00507483	0.00566474	0.00631872	0.000601875	0.00653891	0.0057833	0.0045171	0.00219266	0.00613466	0.00654647	0.00382411	0.00544496	0.000436601	2.99687e-05	0.0027781	-0.000332211	0.000804854	0.00148013	0.00300107	0.0033813	0.00761738	0.00159196	0.0038624	0.00500218	0.000294174	0.00200745	0.00368999	0.00171494	0.00231669	0.00231965	0.00184265	0.00287852	-0.00255713	0.00172481	0.00107741	-0.000304123	0.00112736
sem baseline	0.00204891	0.00203859	0.00196738	0.00194798	0.00192713	0.00190462	0.00188812	0.00218631	0.00183945	0.00181076	0.00179532	0.00175529	0.00175457	0.0017282	0.00164393	0.0016962	0.00160223	0.00156065	0.00155116	0.00155553	0.00153129	0.00152678	0.00151573	0.00144072	0.00142602	0.00142144	0.00138757	0.00133799	0.00130109	0.00123802	0.00122935	0.00121323	0.00121031	0.00116334	0.00114077	0.00113732	0.00104229	0.00103167	0.000996134	0.000948711	0.000920809	0.000909783	0.000900766	0.000865865	0.000837957	0.000792016	0.000783991	0.00071608	0.000709272
Av acute	0.0638412	0.0445854	0.0286955	0.0238126	0.0161659	0.00993449	0.00908561	0.00629304	0.00375191	0.00931374	0.0059439	0.00472779	0.00473548	0.0044525	0.00365882	0.00669152	0.00652979	0.0061738	0.00258189	-0.000142175	0.00366317	-0.00087072	0.00275062	0.00241467	0.00562853	1.05383e-05	0.00140296	0.00306164	0.000542625	0.00231118	0.00534466	0.000807451	-0.000532989	-0.00136053	-0.000377036	0.00177991	0.00139759	-0.00212033	-0.0020605	-0.00265125	-0.00146661	-0.00160558	0.00131966	0.00259787	-0.00250864	-0.00397071	-0.00245958	4.02883e-05	-0.00129989
sem acute	0.00175897	0.00166476	0.00159481	0.00164695	0.00153974	0.00153569	0.00151634	0.00147239	0.00147937	0.00142628	0.00143256	0.00139517	0.00137697	0.00136709	0.00131034	0.00129951	0.00125049	0.00129372	0.00125679	0.00129253	0.00122243	0.00121656	0.00126575	0.00118901	0.00115472	0.00115775	0.00116827	0.0011378	0.0011075	0.00114151	0.00107906	0.00106305	0.00106065	0.00104396	0.0010233	0.000972392	0.000987171	0.000982009	0.000954378	0.000983533	0.00090891	0.000882655	0.000845183	0.00082967	0.000804711	0.000786543	0.00069869	0.000727431	0.000701193
Chronic	-58	-57	-56	-55	-54	-53	-52	-51	-50	-49	-48	-47	-46	-45	-44	-43	-42	-41	-40	-39	-38	-37	-36	-35	-34	-33	-32	-31	-30	-29	-28	-27	-26	-25	-24	-23	-22	-21	-20	-19	-18	-17	-16	-15	-14	-13	-12	-11	-10
Av Baseline	0.013873	0.0126116	0.0138284	0.0068878	0.00493634	0.00433289	0.00366095	0.000688766	-0.00832629	0.00121486	0.00441709	0.00596908	0.00290404	0.0012294	0.000707568	0.00389968	0.00872041	-0.000767543	0.00123954	0.00401645	0.00469673	0.0058035	-0.0026246	0.00472355	0.00652458	0.00010204	0.00146088	0.00213762	-0.000723699	0.00153737	-0.000568918	0.00140295	-0.00161868	-0.000169122	-0.00212419	0.0035935	-0.00203544	-0.00410758	-0.00225568	-0.000656154	0.00151298	-0.00119859	0.00322223	0.00263815	0.000597172	-0.00401865	-0.00325403	-0.0017064	-0.000407687
sem baseline	0.00251309	0.0025228	0.00245905	0.00250676	0.00239104	0.00226747	0.00225617	0.00220541	0.00212031	0.00214871	0.00214758	0.00208291	0.00205733	0.00201851	0.00196416	0.00200073	0.00194296	0.00189661	0.00188216	0.00186191	0.00191521	0.00183507	0.00184698	0.0017957	0.00178689	0.00169108	0.0016805	0.0016416	0.00157089	0.0015946	0.00150488	0.00151441	0.00144271	0.00146024	0.00139148	0.00140303	0.00136474	0.00135441	0.00120705	0.00116747	0.00114964	0.00113306	0.00108552	0.00112055	0.00109421	0.000993949	0.00098559	0.000928331	0.000932071
Av chronic	0.0707387	0.0456569	0.0335518	0.0203042	0.0111168	0.0130655	0.00606805	0.00633176	0.00932638	-0.00102724	-0.00179409	0.00863214	0.00343601	0.0048919	0.00852264	0.000936886	0.00412342	0.00290726	0.00499544	0.00635447	0.00215919	0.00411836	0.000202151	-7.75141e-05	-0.00190473	-0.00355157	-0.00111248	-0.00429112	-0.0015104	-0.00280377	-0.000260754	-0.00206385	0.0014856	0.000474982	0.002663	-0.000694435	-0.005066	-0.00172625	-0.00445111	-0.00278206	-0.00195685	-0.00480674	0.000357355	-0.00130714	-0.00146223	-0.00236011	-0.00469565	-0.00387415	-0.00575475
sem chronic	0.00167139	0.00160459	0.00150488	0.00145874	0.00145276	0.00154703	0.00149728	0.00146313	0.00145325	0.00148464	0.0014403	0.00150507	0.00140843	0.00137305	0.00137745	0.00134435	0.00140865	0.0013581	0.00141047	0.00133617	0.00133351	0.00132367	0.00129259	0.00129001	0.00127168	0.00131547	0.00124692	0.00132903	0.00123483	0.00126335	0.00124099	0.00118952	0.00117636	0.00120726	0.00118936	0.00117497	0.00120859	0.00112281	0.00108025	0.00109493	0.00112097	0.00101567	0.000964434	0.000957478	0.000945143	0.000990084	0.000957622	0.000842372	0.000894799
[truncated: 71 more columns]

## Sheet: Panel D
			log[DAMGO]	-10	-9	-8	-7.5	-7	-6.5	-5		-10	-9	-8	-7.5	-7	-6.5	-5
			cell 1	51.6313	55.3204	52.0142	72.2141	83.9274	99.6016	92.9404		13.7686	17.1064	6.42712	14.9604	17.4384	47.5655	77.9571
			cell2	32.4348	34.5778	62.2156	94.5204	98.0001	95.3225	92.34		12.6674	1.13298	21.9396	32.4627	47.9625	54.1618	66.3284
			cell 3	28.1067	40.3675	67.0401	88.4459	92.8779	108.009	67.5926		9.49859	4.0864	27.275	10.2278	46.0806	46.3272	14.4846
			cell 4	40.4439	66.7536	63.1043	74.8819	90.4499	109.304	112.06		-0.886534	1.75234	0.467836	14.0274	23.2501	50.9331	65.2887
			cell 5	28.7163	49.0786	52.1067	92.6787	94.3124	115.824	117.177		14.4787	3.34899	14.1189	44.0486	24.6561	81.6952	43.9658
			cell 6	46.3911	42.8814	64.0015	91.0345	96.1988	114.25	95.1983		7.14441	2.67835	16.1736	27.5743	46.5173	57.8673	54.2383
			cell 7			75.818	64.4705	104.693	104.989	62.6853		2.50932	18.7581	11.5554	36.5177	32.176	72.856	18.5992
			cell 8			72.0635	81.6134	100.81	118.44	86.592		23.8581	9.09898	-10.2517	54.5882	39.6864	98.3027	64.4218
			cell 9			83.8189	77.2907	100.93	82.7563	68.1671		-2.86185	16.5678	34.0176	30.5445	58.108	76.1411	55.2808
			cell 10			80.9207		119.759		101.474		31.099	6.93291					60.8529
			cell 11							90.0931		-10.435	-16.4291					77.3787
			cell 12							102.589		30.0096	31.48					72.1738
			cell 13							98.9025		2.00863	0.682884					62.3577
			cell 14							130.113		26.6343	21.9099
			cell 15							132.375		10.4165	17.661
			cell 16							115.255		4.3406	-1.4393
			cell 17							107.317		16.2624	20.938
			cell 18							102.78		-21.4177	-30.0542
			cell 19							112.904		-3.14126	-3.12928
			cell 20							111.445
			Av	37.954	48.1632	67.3104	81.9056	98.1959	105.389	100		8.73441	6.47806	13.5248	29.4391	37.3195	65.0944	56.4098
			SEM	3.98839	4.72899	3.45211	3.47597	3.0413	3.77707	4.24959		3.14668	3.28864	4.52962	4.89627	4.5528	6.00048	5.54539

## Sheet: Panel G
	Av	1.59784	1.32751							1.17306	1.45997
	Median	1	1							0.663786	1.07586			Stats	KS	Green	Red
		MOR	No treatment							MOR	Chronic				MOR	2.3896e-49	7.2613e-04
		n synapse	3520							n synapse	3053
		Green	Red	Freq						Green	Red	Freq
		-1.36646	0.053392	0.000284091						-1.65925	0.103249	0.000327547
		-0.678812	0.0534684	0.000568182						-1.45131	0.12156	0.000655093
		-0.635317	0.0667425	0.000852273						-1.06753	0.124119	0.00098264
		-0.57393	0.0685383	0.00113636						-1.05799	0.125514	0.00131019
		-0.566879	0.0686988	0.00142045						-1.03395	0.129457	0.00163773
		-0.549357	0.0727573	0.00170455						-0.920637	0.129981	0.00196528
		-0.546959	0.0872288	0.00198864						-0.786665	0.13834	0.00229283
		-0.454632	0.0898502	0.00227273						-0.781458	0.141771	0.00262037
		-0.449368	0.0898697	0.00255682						-0.720102	0.142383	0.00294792
		-0.41342	0.091851	0.00284091						-0.659855	0.146699	0.00327547
		-0.411483	0.100356	0.003125						-0.614233	0.148997	0.00360301
		-0.407848	0.105561	0.00340909						-0.556745	0.151678	0.00393056
		-0.398266	0.105957	0.00369318						-0.436508	0.152322	0.00425811
		-0.396303	0.106089	0.00397727						-0.43009	0.1546	0.00458565
		-0.390998	0.108057	0.00426136						-0.426735	0.158229	0.0049132
		-0.371686	0.109531	0.00454545						-0.389075	0.1589	0.00524075
		-0.368501	0.110488	0.00482955						-0.38332	0.160629	0.00556829
		-0.36061	0.110743	0.00511364						-0.376597	0.160768	0.00589584
		-0.35635	0.114671	0.00539773						-0.36582	0.163795	0.00622339
		-0.352722	0.118207	0.00568182						-0.363752	0.165016	0.00655093
		-0.348199	0.118485	0.00596591						-0.361427	0.165249	0.00687848
		-0.346369	0.118649	0.00625						-0.348688	0.167073	0.00720603
		-0.336733	0.119622	0.00653409						-0.33622	0.168124	0.00753357
		-0.329959	0.119911	0.00681818						-0.335634	0.170658	0.00786112
		-0.325126	0.123757	0.00710227						-0.335337	0.17091	0.00818867
		-0.322827	0.125053	0.00738636						-0.334783	0.172982	0.00851621
		-0.322393	0.128879	0.00767045						-0.331148	0.173045	0.00884376
		-0.317065	0.129071	0.00795455						-0.322678	0.176098	0.00917131
		-0.316245	0.129617	0.00823864						-0.31642	0.177291	0.00949885
		-0.306408	0.129955	0.00852273						-0.311576	0.177594	0.0098264
		-0.305588	0.133636	0.00880682						-0.297542	0.177811	0.0101539
		-0.302206	0.137446	0.00909091						-0.292872	0.177891	0.0104815
		-0.298062	0.137679	0.009375						-0.282491	0.179104	0.010809
		-0.283656	0.13801	0.00965909						-0.279504	0.179111	0.0111366
		-0.278644	0.139101	0.00994318						-0.279435	0.180989	0.0114641
		-0.275445	0.139403	0.0102273						-0.278842	0.18278	0.0117917
		-0.267062	0.140003	0.0105114						-0.266979	0.185411	0.0121192
		-0.259238	0.142126	0.0107955						-0.266215	0.185449	0.0124468
		-0.256707	0.143165	0.0110795						-0.259973	0.186171	0.0127743
		-0.254994	0.143544	0.0113636						-0.257007	0.191468	0.0131019
		-0.243624	0.144053	0.0116477						-0.248576	0.193352	0.0134294
		-0.240087	0.145729	0.0119318						-0.240302	0.195174	0.013757
		-0.23881	0.146991	0.0122159						-0.234099	0.196848	0.0140845
		-0.231653	0.147157	0.0125						-0.232559	0.197245	0.0144121
		-0.226087	0.147779	0.0127841						-0.224676	0.197925	0.0147396
		-0.221338	0.149501	0.0130682						-0.223898	0.199226	0.0150671
		-0.220588	0.151991	0.0133523						-0.223433	0.199863	0.0153947
		-0.220574	0.153194	0.0136364						-0.219659	0.201151	0.0157222
		-0.210949	0.153276	0.0139205						-0.21873	0.201995	0.0160498
		-0.206803	0.153847	0.0142045						-0.217255	0.202079	0.0163773
		-0.205576	0.15602	0.0144886						-0.214774	0.203156	0.0167049
		-0.203825	0.157035	0.0147727						-0.212892	0.205136	0.0170324
		-0.197642	0.157176	0.0150568						-0.210005	0.206489	0.01736
		-0.196753	0.157904	0.0153409						-0.208356	0.20704	0.0176875
		-0.191358	0.158336	0.015625						-0.208146	0.207982	0.0180151
		-0.179148	0.159404	0.0159091						-0.202279	0.208887	0.0183426
		-0.177568	0.160317	0.0161932						-0.198543	0.213158	0.0186702
		-0.174794	0.161081	0.0164773						-0.197933	0.215623	0.0189977
		-0.173369	0.161112	0.0167614						-0.194552	0.21627	0.0193253
		-0.166493	0.161431	0.0170455						-0.194345	0.217133	0.0196528
		-0.164258	0.162315	0.0173295						-0.192214	0.217682	0.0199803
		-0.160412	0.164815	0.0176136						-0.189717	0.220772	0.0203079
		-0.155545	0.164906	0.0178977						-0.189018	0.221393	0.0206354
		-0.155117	0.165642	0.0181818						-0.188412	0.221997	0.020963
		-0.154806	0.165709	0.0184659						-0.186829	0.222949	0.0212905
		-0.152961	0.165897	0.01875						-0.186559	0.223248	0.0216181
		-0.150442	0.165987	0.0190341						-0.183544	0.224387	0.0219456
		-0.147783	0.166926	0.0193182						-0.183497	0.224427	0.0222732
		-0.145934	0.167095	0.0196023						-0.182942	0.224797	0.0226007
		-0.142865	0.169883	0.0198864						-0.18191	0.225161	0.0229283
		-0.138762	0.173122	0.0201705						-0.181236	0.226698	0.0232558
		-0.13708	0.17335	0.0204545						-0.180071	0.226701	0.0235834
		-0.132987	0.174454	0.0207386						-0.178133	0.226963	0.0239109
		-0.132351	0.177006	0.0210227						-0.177068	0.229006	0.0242385
		-0.13058	0.180069	0.0213068						-0.176792	0.229129	0.024566
		-0.128203	0.180213	0.0215909						-0.1752	0.229302	0.0248935
		-0.122898	0.181882	0.021875						-0.173476	0.229521	0.0252211
		-0.119683	0.184006	0.0221591						-0.173457	0.230384	0.0255486
		-0.118339	0.186616	0.0224432						-0.17168	0.23134	0.0258762
		-0.113297	0.187057	0.0227273						-0.164211	0.231397	0.0262037
		-0.112864	0.187266	0.0230114						-0.163547	0.23253	0.0265313
		-0.112001	0.18739	0.0232955						-0.160858	0.233384	0.0268588
		-0.111383	0.190016	0.0235795						-0.155005	0.235244	0.0271864
		-0.109779	0.190506	0.0238636						-0.151979	0.235728	0.0275139
		-0.107365	0.192785	0.0241477						-0.150263	0.235742	0.0278415
		-0.106516	0.194921	0.0244318						-0.149672	0.237389	0.028169
		-0.106092	0.195343	0.0247159						-0.149242	0.237497	0.0284966
		-0.104531	0.195397	0.025						-0.148553	0.238348	0.0288241
		-0.0983197	0.196022	0.0252841						-0.147569	0.240726	0.0291517
		-0.0974308	0.196357	0.0255682						-0.147013	0.241248	0.0294792
		-0.0965392	0.196534	0.0258523						-0.144437	0.241697	0.0298067
		-0.0936615	0.196738	0.0261364						-0.140184	0.241852	0.0301343
		-0.0935454	0.196862	0.0264205						-0.13976	0.243304	0.0304618
		-0.0924551	0.197149	0.0267045						-0.133956	0.243575	0.0307894
		-0.0923691	0.198395	0.0269886						-0.128277	0.24362	0.0311169
		-0.0873112	0.200203	0.0272727						-0.127472	0.243823	0.0314445
		-0.0870746	0.200484	0.0275568						-0.124835	0.245066	0.031772
		-0.0857149	0.202206	0.0278409						-0.123559	0.245083	0.0320996
		-0.0846154	0.2031	0.028125						-0.123124	0.245191	0.0324271
		-0.0846056	0.203476	0.0284091						-0.11959	0.245727	0.0327547
		-0.0844452	0.204764	0.0286932						-0.119426	0.245805	0.0330822
		-0.0827001	0.204951	0.0289773						-0.117778	0.246124	0.0334098
		-0.0805042	0.205114	0.0292614						-0.114504	0.24618	0.0337373
		-0.08029	0.205192	0.0295455						-0.113873	0.248079	0.0340649
		-0.0790342	0.205439	0.0298295						-0.110768	0.248183	0.0343924
		-0.0784676	0.205503	0.0301136						-0.110309	0.248631	0.0347199
		-0.0758429	0.206394	0.0303977						-0.109434	0.249807	0.0350475
		-0.0748836	0.208502	0.0306818						-0.108493	0.250812	0.035375
		-0.0741653	0.210762	0.0309659						-0.108002	0.251518	0.0357026
		-0.0734056	0.211348	0.03125						-0.10578	0.253064	0.0360301
		-0.0710362	0.211778	0.0315341						-0.104297	0.254302	0.0363577
		-0.0692278	0.212286	0.0318182						-0.104179	0.254602	0.0366852
		-0.0673373	0.213395	0.0321023						-0.102446	0.255404	0.0370128
		-0.0618673	0.213523	0.0323864						-0.100561	0.255479	0.0373403
		-0.0601581	0.214426	0.0326705						-0.0995091	0.255664	0.0376679
		-0.0547003	0.215748	0.0329545						-0.0983676	0.255753	0.0379954
		-0.0527197	0.215992	0.0332386						-0.0982559	0.255929	0.038323
		-0.0512735	0.216067	0.0335227						-0.0979322	0.257793	0.0386505
		-0.051173	0.217735	0.0338068						-0.0928633	0.25849	0.0389781
		-0.0500588	0.218494	0.0340909						-0.0909606	0.259179	0.0393056
		-0.0477223	0.220302	0.034375						-0.0899513	0.259431	0.0396331
		-0.0472569	0.221612	0.0346591						-0.08962	0.260157	0.0399607
		-0.0455631	0.223141	0.0349432						-0.0894646	0.260704	0.0402882
		-0.0446118	0.223603	0.0352273						-0.0891741	0.262372	0.0406158
		-0.0428493	0.224414	0.0355114						-0.0876852	0.262488	0.0409433
		-0.0395628	0.224428	0.0357955						-0.0842817	0.263804	0.0412709
		-0.0377482	0.224733	0.0360795						-0.0821706	0.264148	0.0415984
		-0.0376284	0.224939	0.0363636						-0.0817326	0.265281	0.041926
		-0.0373443	0.226104	0.0366477						-0.0813153	0.267022	0.0422535
		-0.0367987	0.226293	0.0369318						-0.0804295	0.270791	0.0425811
		-0.035817	0.227717	0.0372159						-0.0781075	0.270922	0.0429086
		-0.0341605	0.22879	0.0375						-0.0766121	0.271274	0.0432362
		-0.0326811	0.229327	0.0377841						-0.0756691	0.271804	0.0435637
		-0.0294179	0.23016	0.0380682						-0.0745321	0.273516	0.0438913
		-0.0282202	0.231542	0.0383523						-0.0732416	0.274168	0.0442188
		-0.0280162	0.231601	0.0386364						-0.0707565	0.274779	0.0445463
		-0.0275505	0.231606	0.0389205						-0.0669015	0.275377	0.0448739
		-0.0265015	0.233362	0.0392045						-0.0650567	0.27624	0.0452014
		-0.0263068	0.234005	0.0394886						-0.0642446	0.27672	0.045529
		-0.0257075	0.234389	0.0397727						-0.0625742	0.277015	0.0458565
		-0.0229788	0.236027	0.0400568						-0.0623161	0.277082	0.0461841
		-0.021985	0.237095	0.0403409						-0.0613505	0.279595	0.0465116
		-0.0215552	0.237381	0.040625						-0.0605158	0.280358	0.0468392
		-0.0212513	0.23742	0.0409091						-0.0595207	0.280607	0.0471667
		-0.0186771	0.237801	0.0411932						-0.0572555	0.281982	0.0474943
		-0.0176041	0.238069	0.0414773						-0.0571985	0.28205	0.0478218
		-0.0175318	0.238094	0.0417614						-0.0557361	0.282218	0.0481494
		-0.016818	0.238615	0.0420455						-0.0556883	0.284191	0.0484769
		-0.0139878	0.238776	0.0423295						-0.0555692	0.284653	0.0488045
		-0.0118955	0.239042	0.0426136						-0.0552237	0.285759	0.049132
		-0.0110661	0.240876	0.0428977						-0.0545191	0.286897	0.0494595
		-0.00948813	0.241217	0.0431818						-0.0539153	0.28729	0.0497871
		-0.00947235	0.24169	0.0434659						-0.0536788	0.288503	0.0501146
		-0.00921783	0.24232	0.04375						-0.0520983	0.290314	0.0504422
		-0.00711919	0.242424	0.0440341						-0.0516561	0.291303	0.0507697
		-0.00631096	0.242442	0.0443182						-0.0506516	0.292163	0.0510973
		-0.00585291	0.243575	0.0446023						-0.0505192	0.29229	0.0514248
		-0.00443055	0.243942	0.0448864						-0.0483119	0.292385	0.0517524
		-0.00332452	0.244365	0.0451705						-0.0476659	0.2924	0.0520799
		-0.00199191	0.244405	0.0454545						-0.0474617	0.292559	0.0524075
		-0.00124459	0.245636	0.0457386						-0.0465704	0.292576	0.052735
		-0.00115745	0.24581	0.0460227						-0.0456348	0.29293	0.0530626
		0.00182603	0.246765	0.0463068						-0.0453535	0.293434	0.0533901
		0.00210843	0.247317	0.0465909						-0.0440402	0.294873	0.0537177
		0.00622543	0.247549	0.046875						-0.0427105	0.294908	0.0540452
		0.00891435	0.247728	0.0471591						-0.0423546	0.295679	0.0543727
		0.00900508	0.248284	0.0474432						-0.0421004	0.296446	0.0547003
		0.0104286	0.248495	0.0477273						-0.0415801	0.296834	0.0550278
		0.0104757	0.248545	0.0480114						-0.0411085	0.296947	0.0553554
		0.0107102	0.249849	0.0482955						-0.040877	0.297174	0.0556829
		0.0127629	0.25009	0.0485795						-0.0407471	0.297248	0.0560105
		0.0137253	0.250211	0.0488636						-0.0399274	0.29758	0.056338
		0.0144001	0.251216	0.0491477						-0.0394162	0.29801	0.0566656
		0.0167578	0.25172	0.0494318						-0.0393789	0.298357	0.0569931
		0.0170114	0.254498	0.0497159						-0.0391206	0.298634	0.0573207
		0.018197	0.255889	0.05						-0.0382236	0.299293	0.0576482
		0.0185628	0.256026	0.0502841						-0.037917	0.299812	0.0579758
		0.0200001	0.256652	0.0505682						-0.0379038	0.300795	0.0583033
		0.0200523	0.256746	0.0508523						-0.037074	0.300954	0.0586309
		0.0204026	0.256837	0.0511364						-0.0366216	0.301958	0.0589584
		0.0216213	0.257322	0.0514205						-0.0359555	0.303079	0.0592859
		0.0218857	0.258069	0.0517045						-0.0335048	0.303688	0.0596135
		0.023345	0.259275	0.0519886						-0.0329856	0.303767	0.059941
		0.0245687	0.259461	0.0522727						-0.032457	0.30395	0.0602686
		0.0254088	0.260262	0.0525568						-0.0319145	0.304636	0.0605961
		0.0286725	0.260417	0.0528409						-0.0317544	0.306206	0.0609237
		0.0299992	0.260625	0.053125						-0.0316232	0.306427	0.0612512
		0.0342122	0.260631	0.0534091						-0.030488	0.30843	0.0615788
		0.0350199	0.260976	0.0536932						-0.029488	0.308448	0.0619063
		0.035627	0.262161	0.0539773						-0.0275678	0.308547	0.0622339
		0.0358253	0.262199	0.0542614						-0.024636	0.309002	0.0625614
		0.0364538	0.262499	0.0545455						-0.0241647	0.309134	0.062889
		0.036838	0.262809	0.0548295						-0.0241146	0.310419	0.0632165
		0.0377209	0.262999	0.0551136						-0.0211524	0.310604	0.0635441
		0.0413052	0.263367	0.0553977						-0.0198694	0.311557	0.0638716
		0.0413199	0.264046	0.0556818						-0.0198318	0.311832	0.0641991
		0.0438865	0.264105	0.0559659						-0.0193034	0.31311	0.0645267
		0.0455371	0.26518	0.05625						-0.0182211	0.314314	0.0648542
		0.0465802	0.265499	0.0565341						-0.0177258	0.314575	0.0651818
		0.0501955	0.266472	0.0568182						-0.0167479	0.315922	0.0655093
		0.0506368	0.267161	0.0571023						-0.0160794	0.316484	0.0658369
		0.0510082	0.267699	0.0573864						-0.0147883	0.317335	0.0661644
		0.0531918	0.268313	0.0576705						-0.0147415	0.318331	0.066492
		0.0537756	0.268537	0.0579545						-0.0138518	0.318566	0.0668195
		0.0541697	0.268712	0.0582386						-0.0137648	0.319385	0.0671471
		0.0558991	0.269211	0.0585227						-0.013451	0.320497	0.0674746
		0.0583025	0.27002	0.0588068						-0.0122411	0.321662	0.0678022
		0.0618576	0.270116	0.0590909						-0.0114622	0.322435	0.0681297
		0.063691	0.270735	0.059375						-0.0111509	0.322775	0.0684573
		0.0650975	0.271657	0.0596591						-0.00818178	0.322884	0.0687848
		0.0658152	0.272115	0.0599432						-0.00547586	0.322986	0.0691123
		0.0658393	0.273237	0.0602273						-0.00525732	0.325309	0.0694399
		0.066447	0.273349	0.0605114						-0.00499726	0.325437	0.0697674
		0.0692199	0.274042	0.0607955						-0.00472069	0.326544	0.070095
		0.0708394	0.274284	0.0610795						-0.00288115	0.326876	0.0704225
		0.0711342	0.274412	0.0613636						-0.00219374	0.328094	0.0707501
		0.0725275	0.276945	0.0616477						0.000110369	0.328868	0.0710776
		0.0728692	0.278857	0.0619318						0.00131945	0.330903	0.0714052
		0.0753254	0.279295	0.0622159						0.00133605	0.331027	0.0717327
		0.0762422	0.279374	0.0625						0.00134276	0.331351	0.0720603
		0.0771936	0.279426	0.0627841						0.0023471	0.332208	0.0723878
		0.0786522	0.279454	0.0630682						0.00337457	0.332869	0.0727154
		0.0794362	0.279669	0.0633523						0.0037188	0.332972	0.0730429
		0.0818111	0.279807	0.0636364						0.00408865	0.333237	0.0733705
		0.08192	0.279969	0.0639205						0.00425049	0.333554	0.073698
		0.0821491	0.280572	0.0642045						0.00512779	0.333576	0.0740255
		0.084267	0.281581	0.0644886						0.00710707	0.333822	0.0743531
		0.0843547	0.28212	0.0647727						0.00883146	0.334217	0.0746806
		0.0852472	0.282252	0.0650568						0.0104572	0.334712	0.0750082
		0.0854115	0.282387	0.0653409						0.0109603	0.335519	0.0753357
		0.0875511	0.282402	0.065625						0.0117644	0.335533	0.0756633
		0.0890822	0.282415	0.0659091						0.0118273	0.335989	0.0759908
		0.0892583	0.282487	0.0661932						0.0126154	0.336178	0.0763184
		0.0900278	0.282753	0.0664773						0.0129254	0.336595	0.0766459
		0.0915716	0.282816	0.0667614						0.0130039	0.336701	0.0769735
		0.0925858	0.282997	0.0670455						0.0136252	0.336739	0.077301
		0.0936728	0.283657	0.0673295						0.0144821	0.336816	0.0776286
		0.0938111	0.283695	0.0676136						0.0152009	0.33725	0.0779561
		0.0940587	0.284045	0.0678977						0.01591	0.337459	0.0782837
		0.0942659	0.284456	0.0681818						0.0163552	0.337588	0.0786112
		0.0946699	0.285845	0.0684659						0.0185588	0.337675	0.0789387
		0.0947957	0.288125	0.06875						0.0190897	0.338546	0.0792663
		0.0948284	0.288196	0.0690341						0.0198441	0.338927	0.0795938
		0.0975124	0.288294	0.0693182						0.0199933	0.339712	0.0799214
		0.0985511	0.288605	0.0696023						0.0221701	0.340262	0.0802489
		0.100919	0.288837	0.0698864						0.0226853	0.343708	0.0805765
		0.10151	0.289288	0.0701705						0.0231768	0.343917	0.080904
		0.102454	0.289549	0.0704545						0.0237859	0.344039	0.0812316
		0.103283	0.289583	0.0707386						0.0241412	0.344652	0.0815591
		0.103399	0.289838	0.0710227						0.0249771	0.346373	0.0818867
		0.103885	0.290162	0.0713068						0.0253628	0.346744	0.0822142
		0.106287	0.290725	0.0715909						0.0254188	0.346886	0.0825418
		0.106811	0.291069	0.071875						0.0269691	0.347432	0.0828693
		0.106954	0.291334	0.0721591						0.0277245	0.34749	0.0831969
		0.107475	0.292457	0.0724432						0.0280151	0.349922	0.0835244
		0.108997	0.293308	0.0727273						0.028833	0.350827	0.0838519
		0.110354	0.295232	0.0730114						0.0288868	0.351002	0.0841795
		0.110777	0.295242	0.0732955						0.028937	0.353937	0.084507
		0.111655	0.296062	0.0735795						0.0303845	0.35513	0.0848346
		0.113432	0.296159	0.0738636						0.0314084	0.355569	0.0851621
		0.115735	0.296237	0.0741477						0.0318691	0.356938	0.0854897
		0.115837	0.296325	0.0744318						0.0320178	0.356945	0.0858172
		0.11838	0.296575	0.0747159						0.032504	0.357788	0.0861448
		0.119736	0.297523	0.075						0.032687	0.357796	0.0864723
		0.120457	0.297671	0.0752841						0.0336268	0.361286	0.0867999
		0.122446	0.297789	0.0755682						0.033695	0.361493	0.0871274
		0.1226	0.298213	0.0758523						0.0338798	0.362338	0.087455
		0.124497	0.298353	0.0761364						0.0340476	0.36248	0.0877825
		0.124907	0.299186	0.0764205						0.0362213	0.362719	0.0881101
		0.125282	0.299574	0.0767045						0.0364426	0.363446	0.0884376
		0.126395	0.299663	0.0769886						0.0370798	0.363585	0.0887651
		0.126808	0.299781	0.0772727						0.0375364	0.363744	0.0890927
		0.126953	0.30049	0.0775568						0.0376266	0.36433	0.0894202
		0.127075	0.301002	0.0778409						0.0379592	0.364436	0.0897478
		0.127804	0.301496	0.078125						0.0385933	0.364474	0.0900753
		0.128013	0.301548	0.0784091						0.0401095	0.365607	0.0904029
		0.128254	0.301796	0.0786932						0.040219	0.365811	0.0907304
		0.12869	0.302353	0.0789773						0.0408685	0.365941	0.091058
		0.129093	0.302411	0.0792614						0.041296	0.366531	0.0913855
		0.130042	0.302735	0.0795455						0.0416504	0.36731	0.0917131
		0.131567	0.302894	0.0798295						0.0419407	0.367598	0.0920406
		0.132314	0.30404	0.0801136						0.0432138	0.367969	0.0923682
		0.132438	0.304069	0.0803977						0.0433365	0.368075	0.0926957
		0.133063	0.304783	0.0806818						0.043442	0.36816	0.0930233
		0.133377	0.305515	0.0809659						0.044209	0.368582	0.0933508
		0.134143	0.305521	0.08125						0.0446651	0.368647	0.0936783
		0.134173	0.305858	0.0815341						0.0452338	0.369098	0.0940059
		0.136459	0.307043	0.0818182						0.0454701	0.36918	0.0943334
		0.136739	0.307146	0.0821023						0.0485702	0.369334	0.094661
		0.140835	0.307313	0.0823864						0.0487995	0.370572	0.0949885
		0.141366	0.308451	0.0826705						0.0506541	0.370792	0.0953161
		0.141415	0.309531	0.0829545						0.0510988	0.371609	0.0956436
		0.141496	0.31041	0.0832386						0.0518178	0.372069	0.0959712
		0.141909	0.310628	0.0835227						0.0524718	0.372194	0.0962987
		0.142449	0.310957	0.0838068						0.0533127	0.372305	0.0966263
		0.143298	0.31125	0.0840909						0.054248	0.372494	0.0969538
		0.14474	0.311677	0.084375						0.0544302	0.37251	0.0972814
		0.144782	0.312134	0.0846591						0.0545577	0.373018	0.0976089
		0.144806	0.313292	0.0849432						0.0558515	0.373023	0.0979365
		0.148044	0.314031	0.0852273						0.0566297	0.373649	0.098264
		0.149512	0.314867	0.0855114						0.0569949	0.373914	0.0985915
		0.151083	0.316077	0.0857955						0.0573875	0.374096	0.0989191
		0.151241	0.317038	0.0860795						0.0574603	0.375051	0.0992466
		0.15261	0.317846	0.0863636						0.0575721	0.376137	0.0995742
		0.152725	0.317871	0.0866477						0.0576	0.376767	0.0999017
		0.153085	0.318026	0.0869318						0.0585033	0.377296	0.100229
		0.153864	0.318283	0.0872159						0.0589912	0.377911	0.100557
		0.154819	0.318773	0.0875						0.0605585	0.378292	0.100884
		0.155227	0.318979	0.0877841						0.0611895	0.379828	0.101212
		0.155694	0.319058	0.0880682						0.0615171	0.380616	0.101539
		0.155948	0.319268	0.0883523						0.0618861	0.380734	0.101867
		0.156219	0.319381	0.0886364						0.0623442	0.381002	0.102195
		0.157266	0.319683	0.0889205						0.0629014	0.381804	0.102522
		0.158224	0.320021	0.0892045						0.0631643	0.381903	0.10285
		0.159491	0.320226	0.0894886						0.0653511	0.38332	0.103177
		0.159542	0.320523	0.0897727						0.065447	0.384051	0.103505
		0.160421	0.320653	0.0900568						0.0672564	0.384671	0.103832
		0.161193	0.32095	0.0903409						0.0674612	0.384809	0.10416
		0.161855	0.320973	0.090625						0.0674632	0.386125	0.104487
		0.161879	0.321254	0.0909091						0.0681374	0.386139	0.104815
		0.162492	0.322787	0.0911932						0.068176	0.386649	0.105142
		0.163652	0.322808	0.0914773						0.0706759	0.386824	0.10547
		0.164511	0.322878	0.0917614						0.07104	0.387846	0.105798
		0.166077	0.323108	0.0920455						0.071099	0.388684	0.106125
		0.169186	0.323824	0.0923295						0.0714891	0.388728	0.106453
		0.170418	0.323944	0.0926136						0.0717589	0.388914	0.10678
		0.170667	0.325298	0.0928977						0.072139	0.390285	0.107108
		0.170732	0.325366	0.0931818						0.073208	0.390434	0.107435
		0.170759	0.326064	0.0934659						0.0734603	0.391185	0.107763
		0.171162	0.32682	0.09375						0.0736669	0.391206	0.10809
		0.171856	0.327163	0.0940341						0.0738306	0.39154	0.108418
		0.17189	0.327894	0.0943182						0.0741886	0.392413	0.108745
		0.172804	0.327983	0.0946023						0.0752695	0.392995	0.109073
		0.174815	0.327992	0.0948864						0.0769826	0.393106	0.109401
		0.174836	0.328281	0.0951705						0.0788755	0.393122	0.109728
		0.174897	0.328386	0.0954545						0.0797425	0.393252	0.110056
		0.175021	0.328798	0.0957386						0.0799093	0.394661	0.110383
		0.175471	0.329304	0.0960227						0.0799324	0.394965	0.110711
		0.176672	0.329499	0.0963068						0.0799707	0.395513	0.111038
		0.17851	0.3296	0.0965909						0.0807813	0.395524	0.111366
		0.179896	0.330423	0.096875						0.081007	0.39767	0.111693
		0.182471	0.330925	0.0971591						0.0812177	0.397687	0.112021
		0.182873	0.331455	0.0974432						0.0817795	0.399838	0.112349
		0.182959	0.331999	0.0977273						0.0819787	0.400088	0.112676
		0.183177	0.333095	0.0980114						0.0832064	0.400316	0.113004
		0.183379	0.334102	0.0982955						0.0834016	0.401392	0.113331
		0.184316	0.336012	0.0985795						0.0838329	0.401503	0.113659
		0.18555	0.337555	0.0988636						0.0843566	0.401613	0.113986
		0.185889	0.338299	0.0991477						0.0852626	0.403555	0.114314
		0.186558	0.339246	0.0994318						0.0874575	0.404039	0.114641
		0.188591	0.339564	0.0997159						0.0879732	0.40431	0.114969
		0.189158	0.33993	0.1						0.0892608	0.404734	0.115296
		0.190371	0.340234	0.100284						0.0894177	0.405422	0.115624
		0.192204	0.34163	0.100568						0.0904243	0.405916	0.115952
		0.192773	0.342036	0.100852						0.0927192	0.406413	0.116279
		0.192806	0.342241	0.101136						0.0935663	0.407004	0.116607
		0.19352	0.342332	0.10142						0.0939191	0.408457	0.116934
		0.195021	0.34262	0.101705						0.0953381	0.410785	0.117262
		0.195029	0.343015	0.101989						0.0960531	0.410813	0.117589
		0.195309	0.344173	0.102273						0.0963742	0.411444	0.117917
		0.195766	0.344545	0.102557						0.0965738	0.411755	0.118244
		0.195846	0.344602	0.102841						0.0965864	0.411914	0.118572
		0.196241	0.344905	0.103125						0.0973259	0.412201	0.118899
		0.19647	0.344993	0.103409						0.0983165	0.412435	0.119227
		0.196927	0.345466	0.103693						0.0987217	0.412437	0.119555
		0.197463	0.345504	0.103977						0.0992121	0.413335	0.119882
		0.1988	0.345569	0.104261						0.0999989	0.41338	0.12021
		0.199547	0.345916	0.104545						0.100302	0.413517	0.120537
		0.201326	0.346152	0.10483						0.100354	0.413544	0.120865
		0.201434	0.346431	0.105114						0.100574	0.413798	0.121192
		0.201609	0.347194	0.105398						0.101855	0.41506	0.12152
		0.204355	0.347518	0.105682						0.102497	0.415067	0.121847
		0.204641	0.348751	0.105966						0.102737	0.415364	0.122175
		0.206383	0.348776	0.10625						0.102894	0.41539	0.122502
		0.207089	0.349131	0.106534						0.102919	0.416957	0.12283
		0.207577	0.349201	0.106818						0.103569	0.417427	0.123158
		0.209702	0.349373	0.107102						0.103712	0.417455	0.123485
		0.21125	0.349499	0.107386						0.104767	0.417496	0.123813
		0.211963	0.350052	0.10767						0.106215	0.417668	0.12414
		0.21214	0.350943	0.107955						0.106383	0.417798	0.124468
		0.212158	0.351167	0.108239						0.106758	0.417924	0.124795
		0.212515	0.351542	0.108523						0.107025	0.417997	0.125123
		0.213639	0.351581	0.108807						0.107098	0.41847	0.12545
		0.214713	0.352644	0.109091						0.1074	0.420031	0.125778
		0.214825	0.352825	0.109375						0.107461	0.42163	0.126105
		0.214855	0.353167	0.109659						0.107662	0.422039	0.126433
		0.215908	0.354142	0.109943						0.108399	0.422803	0.126761
		0.217619	0.354915	0.110227						0.10901	0.42321	0.127088
		0.218391	0.355646	0.110511						0.109327	0.424445	0.127416
		0.219423	0.355756	0.110795						0.109904	0.424647	0.127743
		0.219428	0.355814	0.11108						0.109935	0.424815	0.128071
		0.219604	0.35651	0.111364						0.11042	0.424918	0.128398
		0.219747	0.356628	0.111648						0.111341	0.426111	0.128726
		0.220083	0.357052	0.111932						0.11237	0.426252	0.129053
		0.220216	0.357666	0.112216						0.112429	0.427173	0.129381
		0.221298	0.358263	0.1125						0.112635	0.42762	0.129708
		0.22242	0.358585	0.112784						0.113104	0.428687	0.130036
		0.223501	0.359122	0.113068						0.113387	0.429198	0.130364
		0.227814	0.359461	0.113352						0.113433	0.429483	0.130691
		0.228054	0.359809	0.113636						0.113456	0.430507	0.131019
		0.22843	0.359948	0.11392						0.113641	0.430572	0.131346
		0.228814	0.361432	0.114205						0.11396	0.430572	0.131674
		0.22914	0.362204	0.114489						0.114388	0.430774	0.132001
		0.229165	0.362696	0.114773						0.114487	0.431073	0.132329
		0.230936	0.36316	0.115057						0.115222	0.431202	0.132656
		0.231093	0.363507	0.115341						0.11643	0.43138	0.132984
		0.231484	0.363817	0.115625						0.117056	0.431735	0.133311
		0.23166	0.364732	0.115909						0.117484	0.431987	0.133639
		0.231755	0.365769	0.116193						0.117636	0.432141	0.133967
		0.233039	0.365889	0.116477						0.117923	0.4326	0.134294
		0.23388	0.366338	0.116761						0.117951	0.432644	0.134622
		0.234623	0.366833	0.117045						0.11809	0.432791	0.134949
		0.234663	0.367013	0.11733						0.118387	0.432829	0.135277
		0.234711	0.368598	0.117614						0.119904	0.434004	0.135604
		0.235069	0.369005	0.117898						0.120812	0.434864	0.135932
		0.235356	0.36933	0.118182						0.120997	0.435334	0.136259
		0.23628	0.369628	0.118466						0.121301	0.436118	0.136587
		0.236329	0.370741	0.11875						0.121343	0.43699	0.136915
		0.236789	0.370843	0.119034						0.121469	0.437656	0.137242
		0.237197	0.37162	0.119318						0.121479	0.437912	0.13757
		0.237306	0.372166	0.119602						0.121482	0.438433	0.137897
		0.237432	0.372525	0.119886						0.121983	0.438826	0.138225
		0.237641	0.372527	0.12017						0.122102	0.439302	0.138552
		0.237716	0.372816	0.120455						0.122829	0.439634	0.13888
		0.237919	0.373521	0.120739						0.123914	0.439649	0.139207
		0.238655	0.37385	0.121023						0.124091	0.439696	0.139535
		0.238866	0.374918	0.121307						0.124847	0.440701	0.139862
		0.239176	0.376217	0.121591						0.125638	0.441602	0.14019
		0.239813	0.37648	0.121875						0.127197	0.442157	0.140518
		0.240546	0.378561	0.122159						0.127688	0.442538	0.140845
		0.241865	0.379416	0.122443						0.127783	0.442581	0.141173
		0.241873	0.380046	0.122727						0.128858	0.443112	0.1415
		0.242719	0.382023	0.123011						0.129036	0.443315	0.141828
		0.245395	0.383079	0.123295						0.129036	0.44432	0.142155
		0.246311	0.383492	0.12358						0.129581	0.444412	0.142483
		0.248737	0.383931	0.123864						0.130514	0.444498	0.14281
		0.249213	0.384074	0.124148						0.132503	0.44495	0.143138
		0.249721	0.384331	0.124432						0.133254	0.445218	0.143465
		0.249752	0.384867	0.124716						0.134293	0.446017	0.143793
		0.250637	0.385418	0.125						0.135544	0.446107	0.144121
		0.250912	0.38698	0.125284						0.135872	0.446435	0.144448
		0.251043	0.386989	0.125568						0.135889	0.448099	0.144776
		0.251083	0.387033	0.125852						0.136279	0.448239	0.145103
		0.251212	0.388396	0.126136						0.136519	0.449342	0.145431
		0.251496	0.388533	0.12642						0.137672	0.449661	0.145758
		0.252083	0.38868	0.126705						0.138768	0.450405	0.146086
		0.25278	0.388907	0.126989						0.138779	0.450595	0.146413
		0.253744	0.389249	0.127273						0.138803	0.451121	0.146741
		0.253915	0.389368	0.127557						0.139493	0.451848	0.147068
		0.254778	0.389483	0.127841						0.139789	0.452377	0.147396
		0.255492	0.389569	0.128125						0.139904	0.452426	0.147724
		0.255792	0.389634	0.128409						0.140769	0.45252	0.148051
		0.256364	0.390373	0.128693						0.14211	0.453369	0.148379
		0.256804	0.39207	0.128977						0.142695	0.454053	0.148706
		0.257359	0.392604	0.129261						0.143343	0.454789	0.149034
		0.257867	0.392626	0.129545						0.144255	0.455309	0.149361
		0.258191	0.393812	0.12983						0.144388	0.455577	0.149689
		0.258809	0.394779	0.130114						0.14475	0.457025	0.150016
		0.258824	0.396677	0.130398						0.145072	0.457223	0.150344
		0.259137	0.396993	0.130682						0.145105	0.457592	0.150671
		0.259591	0.397219	0.130966						0.146982	0.457883	0.150999
		0.260126	0.398263	0.13125						0.147462	0.458937	0.151327
		0.261184	0.398444	0.131534						0.147497	0.459001	0.151654
		0.261242	0.398525	0.131818						0.147615	0.460184	0.151982
		0.262291	0.398795	0.132102						0.147979	0.461292	0.152309
		0.263811	0.399304	0.132386						0.148803	0.461615	0.152637
		0.26408	0.399425	0.13267						0.149428	0.46164	0.152964
		0.265976	0.400403	0.132955						0.149482	0.461823	0.153292
		0.266013	0.400415	0.133239						0.149507	0.462278	0.153619
		0.266593	0.400446	0.133523						0.149824	0.462616	0.153947
		0.267919	0.400738	0.133807						0.149901	0.462656	0.154274
		0.26816	0.401211	0.134091						0.150589	0.462696	0.154602
		0.26816	0.401723	0.134375						0.15119	0.462846	0.15493
		0.268264	0.401889	0.134659						0.151586	0.46363	0.155257
		0.268977	0.401915	0.134943						0.152103	0.46448	0.155585
		0.269674	0.401943	0.135227						0.152891	0.46477	0.155912
		0.271145	0.402105	0.135511						0.154776	0.465298	0.15624
		0.271267	0.40223	0.135795						0.155536	0.46566	0.156567
		0.271273	0.402248	0.13608						0.155967	0.466008	0.156895
		0.271587	0.402993	0.136364						0.156702	0.466586	0.157222
		0.272517	0.40352	0.136648						0.156985	0.467284	0.15755
		0.27389	0.404322	0.136932						0.157045	0.467439	0.157877
		0.275206	0.404609	0.137216						0.157108	0.468378	0.158205
		0.275339	0.404647	0.1375						0.157397	0.469452	0.158533
		0.27567	0.405193	0.137784						0.158863	0.469541	0.15886
		0.276116	0.40569	0.138068						0.160092	0.46975	0.159188
		0.276995	0.406059	0.138352						0.160324	0.470444	0.159515
		0.277543	0.406474	0.138636						0.160851	0.470862	0.159843
		0.277591	0.406894	0.13892						0.160891	0.470942	0.16017
		0.278946	0.407156	0.139205						0.160911	0.471059	0.160498
		0.279641	0.407915	0.139489						0.161725	0.471304	0.160825
		0.279818	0.407945	0.139773						0.16222	0.472138	0.161153
		0.279909	0.408239	0.140057						0.162361	0.473381	0.161481
		0.281074	0.408576	0.140341						0.162539	0.47363	0.161808
		0.282528	0.409143	0.140625						0.162547	0.47396	0.162136
		0.28319	0.409477	0.140909						0.162642	0.474091	0.162463
		0.283378	0.409554	0.141193						0.163136	0.474128	0.162791
		0.284463	0.409624	0.141477						0.16317	0.474544	0.163118
		0.284934	0.410261	0.141761						0.163843	0.475134	0.163446
		0.286011	0.411116	0.142045						0.16436	0.475159	0.163773
		0.286205	0.411891	0.14233						0.165307	0.475781	0.164101
		0.28925	0.412029	0.142614						0.166998	0.475959	0.164428
		0.291078	0.412613	0.142898						0.167859	0.475976	0.164756
		0.291584	0.41398	0.143182						0.169697	0.476461	0.165084
		0.291786	0.414129	0.143466						0.169788	0.477264	0.165411
		0.29227	0.414208	0.14375						0.169816	0.477304	0.165739
		0.292691	0.415243	0.144034						0.169875	0.478186	0.166066
		0.292926	0.415569	0.144318						0.170044	0.480248	0.166394
		0.293035	0.415734	0.144602						0.170116	0.480408	0.166721
		0.293062	0.415975	0.144886						0.170305	0.480455	0.167049
		0.293235	0.416334	0.14517						0.170396	0.480496	0.167376
		0.293749	0.416642	0.145455						0.170637	0.480559	0.167704
		0.294693	0.416741	0.145739						0.171228	0.480609	0.168031
		0.295704	0.41686	0.146023						0.171301	0.480702	0.168359
		0.295936	0.416915	0.146307						0.172146	0.481785	0.168687
		0.296048	0.417772	0.146591						0.173296	0.48189	0.169014
		0.296454	0.417971	0.146875						0.174008	0.482156	0.169342
		0.296705	0.418018	0.147159						0.175009	0.482211	0.169669
		0.298041	0.418148	0.147443						0.17521	0.482608	0.169997
		0.301034	0.418225	0.147727						0.175241	0.483613	0.170324
		0.302326	0.418765	0.148011						0.176123	0.483645	0.170652
		0.302661	0.419069	0.148295						0.176733	0.483728	0.170979
		0.304571	0.419302	0.14858						0.176871	0.483799	0.171307
		0.306049	0.419775	0.148864						0.177653	0.484079	0.171634
		0.306724	0.419952	0.149148						0.177738	0.484541	0.171962
		0.307242	0.420131	0.149432						0.178487	0.484633	0.17229
		0.307657	0.420461	0.149716						0.178682	0.485103	0.172617
		0.307766	0.421029	0.15						0.179156	0.485311	0.172945
		0.30838	0.421486	0.150284						0.179719	0.485859	0.173272
		0.309173	0.422099	0.150568						0.179925	0.485934	0.1736
		0.309309	0.422721	0.150852						0.180526	0.486232	0.173927
		0.309828	0.422966	0.151136						0.180888	0.488105	0.174255
		0.310742	0.423001	0.15142						0.181081	0.488704	0.174582
		0.310753	0.423804	0.151705						0.181094	0.489333	0.17491
		0.310833	0.424061	0.151989						0.181108	0.489417	0.175237
		0.311266	0.424084	0.152273						0.181234	0.490516	0.175565
		0.311947	0.424939	0.152557						0.181821	0.490859	0.175893
		0.312383	0.425134	0.152841						0.181903	0.491106	0.17622
		0.313147	0.425666	0.153125						0.182331	0.491106	0.176548
		0.314488	0.425812	0.153409						0.18251	0.49115	0.176875
		0.31485	0.42582	0.153693						0.183262	0.491331	0.177203
		0.314988	0.426544	0.153977						0.183348	0.492296	0.17753
		0.315112	0.427905	0.154261						0.183492	0.492902	0.177858
		0.315125	0.4287	0.154545						0.183602	0.493062	0.178185
		0.316026	0.4289	0.15483						0.184161	0.494495	0.178513
		0.316153	0.430429	0.155114						0.184523	0.494505	0.17884
		0.316266	0.430558	0.155398						0.185048	0.495591	0.179168
		0.319297	0.430627	0.155682						0.186023	0.495762	0.179496
		0.319632	0.431481	0.155966						0.187182	0.496078	0.179823
		0.320335	0.431521	0.15625						0.187744	0.496155	0.180151
		0.320399	0.432361	0.156534						0.188031	0.49668	0.180478
		0.320852	0.432665	0.156818						0.188071	0.496789	0.180806
		0.320858	0.433741	0.157102						0.18891	0.497226	0.181133
		0.321254	0.434455	0.157386						0.188994	0.497611	0.181461
		0.321728	0.434866	0.15767						0.18949	0.497664	0.181788
		0.32216	0.435159	0.157955						0.189628	0.497674	0.182116
		0.324424	0.436137	0.158239						0.191098	0.498008	0.182443
		0.325146	0.437939	0.158523						0.19134	0.498271	0.182771
		0.325395	0.438059	0.158807						0.191508	0.498445	0.183099
		0.325478	0.438235	0.159091						0.191615	0.498655	0.183426
		0.326025	0.438235	0.159375						0.192204	0.499242	0.183754
		0.326761	0.438327	0.159659						0.192494	0.499509	0.184081
		0.32792	0.438382	0.159943						0.192516	0.49969	0.184409
		0.328293	0.438465	0.160227						0.193368	0.500847	0.184736
		0.328476	0.438523	0.160511						0.194198	0.502499	0.185064
		0.329501	0.438529	0.160795						0.194252	0.502783	0.185391
		0.329584	0.438901	0.16108						0.194522	0.503688	0.185719
		0.32966	0.439242	0.161364						0.196014	0.505622	0.186047
		0.32986	0.439459	0.161648						0.198284	0.505742	0.186374
		0.330164	0.439554	0.161932						0.198463	0.50582	0.186702
		0.330916	0.440049	0.162216						0.198512	0.508192	0.187029
		0.33123	0.440224	0.1625						0.198904	0.508594	0.187357
		0.331268	0.44029	0.162784						0.198982	0.509048	0.187684
		0.331597	0.440648	0.163068						0.199048	0.509052	0.188012
		0.331856	0.440933	0.163352						0.200583	0.509336	0.188339
		0.333262	0.441068	0.163636						0.200593	0.509437	0.188667
		0.33341	0.44125	0.16392						0.201461	0.510585	0.188994
		0.333809	0.441529	0.164205						0.201584	0.510638	0.189322
		0.333873	0.441566	0.164489						0.202025	0.511365	0.18965
		0.334667	0.442509	0.164773						0.202109	0.511681	0.189977
		0.33494	0.442928	0.165057						0.202645	0.511732	0.190305
		0.335173	0.443257	0.165341						0.202724	0.513081	0.190632
		0.335436	0.4433	0.165625						0.203372	0.513467	0.19096
		0.335439	0.443311	0.165909						0.20386	0.514454	0.191287
		0.335774	0.44392	0.166193						0.204055	0.515343	0.191615
		0.336183	0.445161	0.166477						0.204757	0.516071	0.191942
		0.336489	0.445213	0.166761						0.204933	0.516728	0.19227
		0.336831	0.445362	0.167045						0.205282	0.516892	0.192597
		0.337584	0.445421	0.16733						0.205498	0.517604	0.192925
		0.337869	0.445508	0.167614						0.205517	0.517697	0.193253
		0.338273	0.446882	0.167898						0.206043	0.519395	0.19358
		0.338669	0.447283	0.168182						0.20662	0.519775	0.193908
		0.3389	0.447556	0.168466						0.206853	0.519888	0.194235
		0.339072	0.449461	0.16875						0.207195	0.520134	0.194563
		0.3406	0.450263	0.169034						0.208142	0.520176	0.19489
		0.340751	0.450739	0.169318						0.208503	0.520288	0.195218
		0.341292	0.451069	0.169602						0.208677	0.520422	0.195545
		0.341569	0.451412	0.169886						0.209334	0.520832	0.195873
		0.341889	0.451705	0.17017						0.21001	0.521121	0.1962
		0.342664	0.451718	0.170455						0.210125	0.521303	0.196528
		0.34614	0.453389	0.170739						0.210481	0.521676	0.196856
		0.346705	0.453621	0.171023						0.21107	0.522749	0.197183
		0.346778	0.453745	0.171307						0.212212	0.524021	0.197511
		0.347318	0.453831	0.171591						0.213464	0.524401	0.197838
		0.347377	0.453841	0.171875						0.21443	0.524458	0.198166
		0.348014	0.454039	0.172159						0.214823	0.524501	0.198493
		0.348384	0.454084	0.172443						0.215588	0.524508	0.198821
		0.348459	0.454631	0.172727						0.216236	0.525826	0.199148
		0.349181	0.454634	0.173011						0.2172	0.526233	0.199476
		0.350147	0.455407	0.173295						0.218363	0.526778	0.199803
		0.350426	0.45676	0.17358						0.218521	0.527811	0.200131
		0.351061	0.456788	0.173864						0.219138	0.528124	0.200459
		0.351412	0.456992	0.174148						0.219172	0.52847	0.200786
		0.352163	0.457081	0.174432						0.219596	0.528723	0.201114
		0.352244	0.457092	0.174716						0.219968	0.529562	0.201441
		0.352626	0.457407	0.175						0.220347	0.529617	0.201769
		0.353144	0.457954	0.175284						0.221378	0.529791	0.202096
		0.354138	0.459175	0.175568						0.221387	0.530868	0.202424
		0.354905	0.460362	0.175852						0.221822	0.531494	0.202751
		0.355572	0.460526	0.176136						0.222002	0.531578	0.203079
		0.355924	0.460735	0.17642						0.222315	0.531681	0.203406
		0.355982	0.461211	0.176705						0.22286	0.533132	0.203734
		0.356185	0.462023	0.176989						0.223674	0.534211	0.204062
		0.356286	0.462956	0.177273						0.223712	0.534427	0.204389
		0.356321	0.46327	0.177557						0.223775	0.534797	0.204717
		0.356538	0.463408	0.177841						0.226328	0.53493	0.205044
		0.356822	0.463637	0.178125						0.227537	0.535519	0.205372
		0.358403	0.464489	0.178409						0.227862	0.535684	0.205699
		0.359343	0.464787	0.178693						0.227898	0.536156	0.206027
		0.360434	0.464887	0.178977						0.228395	0.536647	0.206354
		0.360946	0.465017	0.179261						0.228464	0.53674	0.206682
		0.361891	0.465123	0.179545						0.228522	0.537536	0.207009
		0.362814	0.465209	0.17983						0.230766	0.537897	0.207337
		0.362819	0.465372	0.180114						0.231381	0.537923	0.207665
		0.364447	0.465767	0.180398						0.231504	0.538046	0.207992
		0.364504	0.465816	0.180682						0.23163	0.538241	0.20832
		0.364801	0.466355	0.180966						0.231941	0.538294	0.208647
		0.364915	0.466901	0.18125						0.232236	0.540471	0.208975
		0.36529	0.467876	0.181534						0.232818	0.54057	0.209302
		0.365656	0.468621	0.181818						0.233486	0.540601	0.20963
		0.36577	0.468679	0.182102						0.234298	0.540893	0.209957
		0.365809	0.46933	0.182386						0.234584	0.541888	0.210285
		0.36653	0.469559	0.18267						0.234827	0.54242	0.210613
		0.367129	0.469848	0.182955						0.234939	0.543535	0.21094
		0.367223	0.469905	0.183239						0.235607	0.543785	0.211268
		0.367251	0.470057	0.183523						0.235692	0.543983	0.211595
		0.367722	0.470084	0.183807						0.235801	0.544156	0.211923
		0.367818	0.470449	0.184091						0.235939	0.544377	0.21225
		0.36814	0.472739	0.184375						0.236058	0.544868	0.212578
		0.368219	0.472787	0.184659						0.236816	0.545196	0.212905
		0.369128	0.473153	0.184943						0.2369	0.545337	0.213233
		0.369854	0.473431	0.185227						0.23742	0.547527	0.21356
		0.369983	0.473643	0.185511						0.238259	0.548485	0.213888
		0.370193	0.47397	0.185795						0.238463	0.548541	0.214216
		0.370206	0.474021	0.18608						0.238794	0.548898	0.214543
		0.370419	0.474113	0.186364						0.239767	0.54894	0.214871
		0.370629	0.474322	0.186648						0.239912	0.548955	0.215198
		0.370766	0.474568	0.186932						0.239935	0.549516	0.215526
		0.373852	0.475429	0.187216						0.239951	0.550229	0.215853
		0.374696	0.475468	0.1875						0.240438	0.550531	0.216181
		0.375077	0.475582	0.187784						0.242075	0.551314	0.216508
		0.375121	0.476253	0.188068						0.242142	0.551488	0.216836
		0.375306	0.476339	0.188352						0.243402	0.551549	0.217163
		0.375314	0.47674	0.188636						0.243583	0.551947	0.217491
		0.376626	0.477018	0.18892						0.243748	0.552323	0.217819
		0.377698	0.477058	0.189205						0.243917	0.552328	0.218146
		0.378427	0.477083	0.189489						0.244536	0.552965	0.218474
		0.378428	0.4773	0.189773						0.244633	0.55343	0.218801
		0.38	0.47752	0.190057						0.244903	0.553577	0.219129
		0.380523	0.478569	0.190341						0.244935	0.554294	0.219456
		0.38093	0.478831	0.190625						0.245067	0.554314	0.219784
		0.381048	0.478856	0.190909						0.245934	0.554323	0.220111
		0.381702	0.479587	0.191193						0.246328	0.554654	0.220439
		0.382929	0.479821	0.191477						0.247116	0.554852	0.220766
		0.382944	0.480762	0.191761						0.247164	0.554983	0.221094
		0.383089	0.481102	0.192045						0.247242	0.555345	0.221422
		0.38314	0.481653	0.19233						0.248043	0.555459	0.221749
		0.383798	0.481995	0.192614						0.248486	0.555842	0.222077
		0.383807	0.482148	0.192898						0.248678	0.556384	0.222404
		0.384531	0.482959	0.193182						0.249611	0.557928	0.222732
		0.385915	0.483996	0.193466						0.25023	0.558375	0.223059
		0.385935	0.484559	0.19375						0.250437	0.558626	0.223387
		0.386056	0.484599	0.194034						0.250798	0.558949	0.223714
		0.386165	0.48577	0.194318						0.251572	0.559218	0.224042
		0.386634	0.485821	0.194602						0.251633	0.559641	0.224369
		0.387539	0.486051	0.194886						0.251871	0.560475	0.224697
		0.387902	0.486099	0.19517						0.252173	0.560492	0.225025
		0.388026	0.486857	0.195455						0.252616	0.560635	0.225352
		0.38978	0.486895	0.195739						0.252674	0.561279	0.22568
		0.389974	0.48697	0.196023						0.253248	0.561336	0.226007
		0.391354	0.487258	0.196307						0.253943	0.561519	0.226335
		0.391841	0.487346	0.196591						0.254545	0.561778	0.226662
		0.39235	0.487472	0.196875						0.254947	0.561837	0.22699
		0.39251	0.487517	0.197159						0.255152	0.561889	0.227317
		0.393116	0.487635	0.197443						0.255352	0.562915	0.227645
		0.395203	0.489163	0.197727						0.255446	0.563664	0.227972
		0.395206	0.489738	0.198011						0.256039	0.563968	0.2283
		0.395759	0.491399	0.198295						0.256546	0.564069	0.228628
		0.396172	0.491789	0.19858						0.256655	0.567766	0.228955
		0.396297	0.492899	0.198864						0.257928	0.568626	0.229283
		0.396442	0.493159	0.199148						0.257983	0.568935	0.22961
		0.396702	0.493236	0.199432						0.259681	0.569113	0.229938
		0.398362	0.493457	0.199716						0.259818	0.569809	0.230265
		0.398759	0.493551	0.2						0.259961	0.570286	0.230593
		0.399988	0.493665	0.200284						0.261466	0.570535	0.23092
		0.401029	0.49379	0.200568						0.262147	0.570655	0.231248
		0.401218	0.493858	0.200852						0.262483	0.570686	0.231575
		0.402298	0.493941	0.201136						0.264026	0.570781	0.231903
		0.402475	0.494057	0.20142						0.264221	0.570879	0.232231
		0.402514	0.494469	0.201705						0.26425	0.570893	0.232558
		0.403069	0.495536	0.201989						0.264398	0.571581	0.232886
		0.403186	0.496741	0.202273						0.264903	0.572079	0.233213
		0.403613	0.497741	0.202557						0.265146	0.572367	0.233541
		0.403755	0.498703	0.202841						0.265264	0.57247	0.233868
		0.403938	0.498807	0.203125						0.266118	0.572831	0.234196
		0.404017	0.499366	0.203409						0.266374	0.573102	0.234523
		0.404343	0.499375	0.203693						0.26657	0.573201	0.234851
		0.404653	0.500272	0.203977						0.267146	0.573585	0.235179
		0.405392	0.502009	0.204261						0.267352	0.573632	0.235506
		0.405619	0.502914	0.204545						0.268348	0.574018	0.235834
		0.405723	0.503324	0.20483						0.268481	0.575141	0.236161
		0.405881	0.503675	0.205114						0.269876	0.575499	0.236489
		0.406806	0.506529	0.205398						0.270199	0.576581	0.236816
		0.407355	0.506715	0.205682						0.273225	0.578239	0.237144
		0.407862	0.507129	0.205966						0.273951	0.578824	0.237471
		0.40851	0.507516	0.20625						0.274458	0.579456	0.237799
		0.408702	0.507693	0.206534						0.274706	0.579779	0.238126
		0.40894	0.507786	0.206818						0.275015	0.579981	0.238454
		0.40981	0.507873	0.207102						0.275046	0.580621	0.238782
		0.409875	0.509179	0.207386						0.275636	0.580622	0.239109
		0.410516	0.509353	0.20767						0.27609	0.581205	0.239437
		0.411388	0.510255	0.207955						0.27651	0.581576	0.239764
		0.411419	0.510733	0.208239						0.276688	0.582047	0.240092
		0.411467	0.511787	0.208523						0.277564	0.583433	0.240419
		0.412089	0.512612	0.208807						0.278056	0.584393	0.240747
		0.412259	0.512954	0.209091						0.279811	0.584728	0.241074
		0.412451	0.513119	0.209375						0.279834	0.586714	0.241402
		0.41274	0.513323	0.209659						0.280228	0.587018	0.241729
		0.413166	0.513737	0.209943						0.280716	0.587084	0.242057
		0.41323	0.513752	0.210227						0.281595	0.587495	0.242385
		0.413234	0.513754	0.210511						0.282289	0.587672	0.242712
		0.413565	0.514104	0.210795						0.282809	0.588815	0.24304
		0.413796	0.514812	0.21108						0.282827	0.589164	0.243367
		0.414704	0.515054	0.211364						0.283191	0.589582	0.243695
		0.414706	0.51573	0.211648						0.283569	0.590707	0.244022
		0.415332	0.515763	0.211932						0.284708	0.592521	0.24435
		0.415973	0.515986	0.212216						0.284926	0.593298	0.244677
		0.416306	0.516209	0.2125						0.285164	0.593359	0.245005
		0.417861	0.516374	0.212784						0.287234	0.594218	0.245332
		0.418433	0.516728	0.213068						0.288675	0.594837	0.24566
		0.418453	0.518042	0.213352						0.289086	0.596068	0.245988
		0.420626	0.518042	0.213636						0.289251	0.59664	0.246315
		0.420841	0.518085	0.21392						0.289532	0.597457	0.246643
		0.421498	0.518335	0.214205						0.289899	0.597707	0.24697
		0.422146	0.518727	0.214489						0.290804	0.59786	0.247298
		0.422247	0.518826	0.214773						0.290891	0.598521	0.247625
		0.422333	0.519051	0.215057						0.290995	0.599196	0.247953
		0.423715	0.520824	0.215341						0.292611	0.599215	0.24828
		0.423915	0.520862	0.215625						0.292733	0.599909	0.248608
		0.424897	0.52295	0.215909						0.293065	0.600394	0.248935
		0.425132	0.522967	0.216193						0.293183	0.600443	0.249263
		0.425728	0.523266	0.216477						0.293696	0.600547	0.249591
		0.427651	0.523635	0.216761						0.294989	0.60122	0.249918
		0.42777	0.523682	0.217045						0.295045	0.602185	0.250246
		0.429115	0.523908	0.21733						0.29555	0.603292	0.250573
		0.429468	0.523939	0.217614						0.296652	0.603496	0.250901
		0.429561	0.524481	0.217898						0.296838	0.604623	0.251228
		0.429794	0.524506	0.218182						0.297508	0.604796	0.251556
		0.431874	0.524754	0.218466						0.298223	0.606188	0.251883
		0.431959	0.524901	0.21875						0.29841	0.606538	0.252211
		0.432666	0.525099	0.219034						0.298971	0.606785	0.252538
		0.432977	0.525265	0.219318						0.299187	0.607368	0.252866
		0.433307	0.525865	0.219602						0.300599	0.607402	0.253194
		0.43332	0.526114	0.219886						0.30066	0.607749	0.253521
		0.433934	0.526267	0.22017						0.300728	0.60876	0.253849
		0.43576	0.526692	0.220455						0.301026	0.609226	0.254176
		0.436069	0.526725	0.220739						0.30156	0.609411	0.254504
		0.437471	0.527156	0.221023						0.30157	0.6098	0.254831
		0.438008	0.52847	0.221307						0.301679	0.610342	0.255159
		0.438411	0.528496	0.221591						0.301689	0.610711	0.255486
		0.439411	0.528635	0.221875						0.304062	0.611956	0.255814
		0.439609	0.528754	0.222159						0.305909	0.612	0.256142
		0.439706	0.529248	0.222443						0.306775	0.612783	0.256469
		0.439843	0.530526	0.222727						0.307919	0.614116	0.256797
		0.441819	0.530705	0.223011						0.30851	0.615819	0.257124
		0.44277	0.53111	0.223295						0.30876	0.615988	0.257452
		0.443371	0.531727	0.22358						0.308872	0.616103	0.257779
		0.443638	0.532948	0.223864						0.30932	0.6175	0.258107
		0.443647	0.533141	0.224148						0.309515	0.617852	0.258434
		0.44406	0.533914	0.224432						0.309573	0.618119	0.258762
		0.445223	0.534488	0.224716						0.31018	0.618666	0.259089
		0.445328	0.535523	0.225						0.311997	0.618839	0.259417
		0.445558	0.53594	0.225284						0.312021	0.619485	0.259745
		0.445611	0.536435	0.225568						0.312072	0.61968	0.260072
		0.445663	0.536647	0.225852						0.312922	0.620029	0.2604
		0.447809	0.536959	0.226136						0.312937	0.621171	0.260727
		0.448554	0.537402	0.22642						0.313516	0.621208	0.261055
		0.448799	0.537996	0.226705						0.31385	0.621294	0.261382
		0.449129	0.5383	0.226989						0.31393	0.621718	0.26171
		0.449286	0.538507	0.227273						0.313979	0.62217	0.262037
		0.449532	0.53988	0.227557						0.314684	0.622487	0.262365
		0.450251	0.540085	0.227841						0.314905	0.622987	0.262692
		0.450663	0.540766	0.228125						0.315633	0.623136	0.26302
		0.451568	0.541016	0.228409						0.31609	0.623456	0.263348
		0.45199	0.541756	0.228693						0.318385	0.623839	0.263675
		0.452085	0.541919	0.228977						0.318451	0.624333	0.264003
		0.452458	0.542176	0.229261						0.319821	0.625089	0.26433
		0.45394	0.542203	0.229545						0.32008	0.625489	0.264658
		0.454212	0.542508	0.22983						0.320082	0.626501	0.264985
		0.454221	0.542772	0.230114						0.320385	0.627963	0.265313
		0.454893	0.542899	0.230398						0.320418	0.628181	0.26564
		0.455006	0.54347	0.230682						0.320777	0.628217	0.265968
		0.455385	0.544115	0.230966						0.322329	0.628334	0.266295
		0.45815	0.544339	0.23125						0.3228	0.628429	0.266623
		0.458239	0.545235	0.231534						0.324097	0.62975	0.266951
		0.458337	0.545585	0.231818						0.325049	0.629923	0.267278
		0.458697	0.545816	0.232102						0.325072	0.630365	0.267606
		0.460071	0.546606	0.232386						0.325306	0.630726	0.267933
		0.460222	0.547346	0.23267						0.325391	0.631279	0.268261
		0.460673	0.548038	0.232955						0.325736	0.63294	0.268588
		0.461011	0.548054	0.233239						0.325944	0.634366	0.268916
		0.461188	0.548287	0.233523						0.326232	0.634441	0.269243
		0.461473	0.548336	0.233807						0.326294	0.635303	0.269571
		0.461867	0.548947	0.234091						0.326475	0.635662	0.269898
		0.462262	0.549123	0.234375						0.326785	0.636109	0.270226
		0.464243	0.549483	0.234659						0.327565	0.636762	0.270554
		0.464254	0.55263	0.234943						0.327746	0.637141	0.270881
		0.464317	0.552777	0.235227						0.327766	0.63787	0.271209
		0.464537	0.553422	0.235511						0.328036	0.637942	0.271536
		0.465243	0.553525	0.235795						0.328465	0.638013	0.271864
		0.465444	0.554	0.23608						0.328491	0.638197	0.272191
		0.4663	0.55532	0.236364						0.328947	0.638331	0.272519
		0.4663	0.555866	0.236648						0.329022	0.638858	0.272846
		0.466427	0.556616	0.236932						0.329184	0.639092	0.273174
		0.468158	0.557021	0.237216						0.329765	0.639782	0.273501
		0.468381	0.557027	0.2375						0.330001	0.639974	0.273829
		0.469576	0.557615	0.237784						0.330258	0.642945	0.274157
		0.469797	0.55774	0.238068						0.331401	0.643744	0.274484
		0.470118	0.557746	0.238352						0.331732	0.644461	0.274812
		0.470651	0.558149	0.238636						0.332197	0.645314	0.275139
		0.470764	0.558976	0.23892						0.332553	0.645756	0.275467
		0.470874	0.559528	0.239205						0.334328	0.646021	0.275794
		0.47102	0.559884	0.239489						0.334692	0.646327	0.276122
		0.471769	0.560228	0.239773						0.334982	0.646802	0.276449
		0.472508	0.56028	0.240057						0.335361	0.646868	0.276777
		0.47291	0.560755	0.240341						0.336526	0.647791	0.277104
		0.474239	0.560995	0.240625						0.337152	0.647991	0.277432
		0.474292	0.561571	0.240909						0.338127	0.648206	0.27776
		0.474619	0.561667	0.241193						0.338419	0.648923	0.278087
		0.475109	0.561991	0.241477						0.339086	0.649486	0.278415
		0.475722	0.562429	0.241761						0.339494	0.649812	0.278742
		0.47581	0.562505	0.242045						0.339717	0.650493	0.27907
		0.476131	0.563388	0.24233						0.340985	0.651483	0.279397
		0.476651	0.564283	0.242614						0.341119	0.651917	0.279725
		0.476867	0.564623	0.242898						0.341396	0.651929	0.280052
		0.476982	0.564701	0.243182						0.34213	0.652488	0.28038
		0.477006	0.565523	0.243466						0.342848	0.652597	0.280708
		0.477121	0.565829	0.24375						0.343109	0.652632	0.281035
		0.477786	0.565839	0.244034						0.343239	0.653146	0.281363
		0.477816	0.565896	0.244318						0.343322	0.653493	0.28169
		0.478138	0.566242	0.244602						0.343637	0.655629	0.282018
		0.478255	0.566738	0.244886						0.344999	0.656171	0.282345
		0.478531	0.566995	0.24517						0.345121	0.656252	0.282673
		0.478844	0.567771	0.245455						0.345991	0.65639	0.283
		0.480478	0.567791	0.245739						0.346343	0.65712	0.283328
		0.480629	0.568108	0.246023						0.346713	0.657212	0.283655
		0.480664	0.568576	0.246307						0.34688	0.658109	0.283983
		0.480681	0.569207	0.246591						0.348009	0.658234	0.284311
		0.48114	0.56921	0.246875						0.34884	0.658549	0.284638
		0.483181	0.569675	0.247159						0.348986	0.65894	0.284966
		0.483289	0.569701	0.247443						0.349296	0.658967	0.285293
		0.483421	0.56975	0.247727						0.349419	0.659456	0.285621
		0.483715	0.569817	0.248011						0.350695	0.659467	0.285948
		0.48433	0.570284	0.248295						0.351869	0.661611	0.286276
		0.486717	0.570399	0.24858						0.351883	0.661677	0.286603
		0.48673	0.570664	0.248864						0.352098	0.662206	0.286931
		0.486928	0.571343	0.249148						0.353631	0.662334	0.287258
		0.486945	0.571827	0.249432						0.353653	0.662538	0.287586
		0.487093	0.573208	0.249716						0.353968	0.662911	0.287914
		0.487424	0.573209	0.25						0.354159	0.663752	0.288241
		0.487709	0.573922	0.250284						0.354575	0.66467	0.288569
		0.488264	0.575101	0.250568						0.354997	0.6664	0.288896
		0.488326	0.576664	0.250852						0.355255	0.666476	0.289224
		0.488885	0.577389	0.251136						0.355591	0.667501	0.289551
		0.489428	0.578338	0.25142						0.355937	0.668248	0.289879
		0.489684	0.579723	0.251705						0.356116	0.668801	0.290206
		0.490229	0.579832	0.251989						0.356516	0.669623	0.290534
		0.490399	0.580039	0.252273						0.356694	0.669639	0.290861
		0.49229	0.581346	0.252557						0.356783	0.669806	0.291189
		0.492566	0.581414	0.252841						0.357273	0.672391	0.291517
		0.492808	0.581445	0.253125						0.357669	0.672788	0.291844
		0.492903	0.581762	0.253409						0.357901	0.674244	0.292172
		0.493501	0.58209	0.253693						0.357951	0.674833	0.292499
		0.49366	0.583339	0.253977						0.358416	0.674964	0.292827
		0.494538	0.583487	0.254261						0.358479	0.675231	0.293154
		0.495083	0.583557	0.254545						0.360601	0.67539	0.293482
		0.4954	0.583588	0.25483						0.361028	0.675505	0.293809
		0.495801	0.583657	0.255114						0.361178	0.67607	0.294137
		0.496308	0.5839	0.255398						0.361179	0.67647	0.294464
		0.49634	0.584534	0.255682						0.361639	0.676556	0.294792
		0.496596	0.584938	0.255966						0.362049	0.676886	0.29512
		0.497004	0.584966	0.25625						0.364018	0.677582	0.295447
		0.497277	0.585006	0.256534						0.364121	0.678103	0.295775
		0.497491	0.58547	0.256818						0.364995	0.67903	0.296102
		0.497539	0.585724	0.257102						0.36543	0.679566	0.29643
		0.498265	0.585729	0.257386						0.366318	0.679748	0.296757
		0.499155	0.586075	0.25767						0.366471	0.680021	0.297085
		0.499211	0.586958	0.257955						0.367065	0.681772	0.297412
		0.499634	0.587123	0.258239						0.367434	0.682967	0.29774
		0.50045	0.587287	0.258523						0.367837	0.683479	0.298067
		0.500506	0.587503	0.258807						0.368257	0.684442	0.298395
		0.501744	0.589754	0.259091						0.368771	0.684784	0.298723
		0.502465	0.590506	0.259375						0.369758	0.685669	0.29905
		0.502883	0.59129	0.259659						0.370606	0.685773	0.299378
		0.503178	0.591537	0.259943						0.370649	0.686278	0.299705
		0.503759	0.59172	0.260227						0.37115	0.687026	0.300033
		0.503868	0.591937	0.260511						0.37117	0.687675	0.30036
		0.504086	0.592171	0.260795						0.371412	0.689528	0.300688
		0.505435	0.592596	0.26108						0.371674	0.689802	0.301015
		0.505445	0.593126	0.261364						0.371871	0.690122	0.301343
		0.505774	0.594002	0.261648						0.372551	0.691662	0.30167
		0.508853	0.594131	0.261932						0.372611	0.691833	0.301998
		0.509392	0.594297	0.262216						0.373138	0.692057	0.302326
		0.510759	0.595384	0.2625						0.374089	0.692318	0.302653
		0.511421	0.596715	0.262784						0.374218	0.69271	0.302981
		0.511868	0.597042	0.263068						0.374761	0.693089	0.303308
		0.512096	0.597544	0.263352						0.375715	0.693246	0.303636
		0.512118	0.597602	0.263636						0.375754	0.693667	0.303963
		0.512563	0.597711	0.26392						0.376419	0.693713	0.304291
		0.512735	0.597799	0.264205						0.376426	0.693945	0.304618
		0.513032	0.597975	0.264489						0.376518	0.694407	0.304946
		0.513505	0.598057	0.264773						0.377808	0.694636	0.305274
		0.513862	0.598492	0.265057						0.378132	0.694843	0.305601
		0.514591	0.599381	0.265341						0.378371	0.695149	0.305929
		0.515908	0.599525	0.265625						0.37902	0.696001	0.306256
		0.516007	0.599536	0.265909						0.379278	0.696516	0.306584
		0.51647	0.599965	0.266193						0.379297	0.697386	0.306911
		0.517207	0.601369	0.266477						0.379346	0.698898	0.307239
		0.517258	0.601841	0.266761						0.379409	0.699044	0.307566
		0.517411	0.603061	0.267045						0.379903	0.699439	0.307894
		0.517837	0.603277	0.26733						0.381001	0.699639	0.308221
		0.519953	0.603391	0.267614						0.381263	0.699921	0.308549
		0.520282	0.60414	0.267898						0.381945	0.70008	0.308877
		0.521188	0.604244	0.268182						0.382844	0.700705	0.309204
		0.52127	0.604327	0.268466						0.383022	0.701392	0.309532
		0.521919	0.604539	0.26875						0.38389	0.701525	0.309859
		0.522302	0.605681	0.269034						0.384522	0.702627	0.310187
		0.522721	0.605889	0.269318						0.385049	0.70281	0.310514
		0.523212	0.606412	0.269602						0.385065	0.703113	0.310842
		0.523858	0.606557	0.269886						0.385117	0.703243	0.311169
		0.524095	0.606659	0.27017						0.385507	0.703642	0.311497
		0.525334	0.606837	0.270455						0.386613	0.703966	0.311824
		0.526498	0.606946	0.270739						0.387235	0.704997	0.312152
		0.526912	0.607483	0.271023						0.387561	0.705741	0.31248
		0.526935	0.607639	0.271307						0.388017	0.706011	0.312807
		0.528644	0.609424	0.271591						0.388069	0.706076	0.313135
		0.530004	0.6105	0.271875						0.390101	0.706582	0.313462
		0.530157	0.610633	0.272159						0.390247	0.70672	0.31379
		0.530558	0.610799	0.272443						0.390299	0.707257	0.314117
		0.531009	0.61088	0.272727						0.390466	0.707893	0.314445
		0.531335	0.611044	0.273011						0.391368	0.70831	0.314772
		0.531552	0.612337	0.273295						0.391913	0.708939	0.3151
		0.531651	0.61242	0.27358						0.392113	0.709187	0.315427
		0.531769	0.612618	0.273864						0.392295	0.709867	0.315755
		0.532331	0.612848	0.274148						0.392298	0.710304	0.316083
		0.53315	0.61348	0.274432						0.392646	0.711288	0.31641
		0.533242	0.614236	0.274716						0.395334	0.711554	0.316738
		0.533461	0.61447	0.275						0.395658	0.7121	0.317065
		0.533527	0.614818	0.275284						0.396562	0.712772	0.317393
		0.534176	0.614956	0.275568						0.396821	0.712806	0.31772
		0.534232	0.615386	0.275852						0.39687	0.713994	0.318048
		0.534812	0.61571	0.276136						0.397611	0.714001	0.318375
		0.535688	0.616503	0.27642						0.397847	0.714702	0.318703
		0.536753	0.616862	0.276705						0.398287	0.714778	0.31903
		0.537137	0.617019	0.276989						0.398297	0.715821	0.319358
		0.537289	0.617439	0.277273						0.398316	0.717338	0.319686
		0.53797	0.617536	0.277557						0.398699	0.717903	0.320013
		0.538089	0.617846	0.277841						0.398901	0.718084	0.320341
		0.538109	0.618588	0.278125						0.399511	0.718891	0.320668
		0.538402	0.618782	0.278409						0.400037	0.719038	0.320996
		0.539162	0.618937	0.278693						0.400151	0.719628	0.321323
		0.539433	0.619499	0.278977						0.400773	0.719628	0.321651
		0.539661	0.620426	0.279261						0.401143	0.719836	0.321978
		0.541378	0.620426	0.279545						0.401473	0.720247	0.322306
		0.541595	0.620565	0.27983						0.401505	0.720255	0.322633
		0.542282	0.620901	0.280114						0.402436	0.721495	0.322961
		0.542705	0.620945	0.280398						0.402905	0.722382	0.323289
		0.543736	0.620997	0.280682						0.402921	0.722706	0.323616
		0.543948	0.621139	0.280966						0.402962	0.723472	0.323944
		0.54648	0.621844	0.28125						0.403244	0.724033	0.324271
		0.547202	0.621963	0.281534						0.403358	0.726658	0.324599
		0.54722	0.622559	0.281818						0.405728	0.728771	0.324926
		0.547562	0.622656	0.282102						0.406607	0.728955	0.325254
		0.547722	0.6229	0.282386						0.40679	0.730086	0.325581
		0.550868	0.623093	0.28267						0.407118	0.73042	0.325909
		0.551512	0.623132	0.282955						0.407571	0.730436	0.326236
		0.553242	0.623411	0.283239						0.407596	0.730454	0.326564
		0.555586	0.623481	0.283523						0.407774	0.730975	0.326892
		0.555993	0.624209	0.283807						0.407881	0.731057	0.327219
		0.556168	0.624737	0.284091						0.408253	0.731314	0.327547
		0.557013	0.624917	0.284375						0.409107	0.733104	0.327874
		0.557831	0.62525	0.284659						0.409653	0.73319	0.328202
		0.559004	0.626245	0.284943						0.409775	0.733203	0.328529
		0.559004	0.626824	0.285227						0.409914	0.733425	0.328857
		0.559993	0.627814	0.285511						0.410408	0.733786	0.329184
		0.560171	0.629196	0.285795						0.410731	0.734112	0.329512
		0.56124	0.629745	0.28608						0.410804	0.734525	0.32984
		0.561274	0.629797	0.286364						0.41111	0.734527	0.330167
		0.561734	0.63061	0.286648						0.411368	0.734792	0.330495
		0.561779	0.631249	0.286932						0.412778	0.735177	0.330822
		0.562315	0.631345	0.287216						0.412971	0.735898	0.33115
		0.562701	0.631859	0.2875						0.413068	0.736124	0.331477
		0.562933	0.632345	0.287784						0.413172	0.736384	0.331805
		0.563466	0.632365	0.288068						0.413706	0.73661	0.332132
		0.564281	0.632513	0.288352						0.414171	0.736686	0.33246
		0.564739	0.632907	0.288636						0.41499	0.736705	0.332787
		0.565537	0.633149	0.28892						0.415588	0.738049	0.333115
		0.565642	0.633441	0.289205						0.416403	0.738424	0.333443
		0.565902	0.633657	0.289489						0.417691	0.738918	0.33377
		0.565965	0.634003	0.289773						0.417719	0.739111	0.334098
		0.566235	0.634306	0.290057						0.418057	0.73915	0.334425
		0.567971	0.635426	0.290341						0.419184	0.740109	0.334753
		0.56855	0.636537	0.290625						0.419867	0.740267	0.33508
		0.568614	0.637038	0.290909						0.420031	0.741206	0.335408
		0.56947	0.637321	0.291193						0.420144	0.741386	0.335735
		0.569632	0.637412	0.291477						0.42032	0.74149	0.336063
		0.569635	0.638041	0.291761						0.420523	0.74263	0.33639
		0.569676	0.638849	0.292045						0.420615	0.743069	0.336718
		0.570163	0.639261	0.29233						0.421094	0.743446	0.337046
		0.57126	0.639286	0.292614						0.421759	0.744187	0.337373
		0.574481	0.639498	0.292898						0.421961	0.744267	0.337701
		0.57519	0.639816	0.293182						0.422649	0.744302	0.338028
		0.575289	0.640097	0.293466						0.423077	0.74506	0.338356
		0.575539	0.64146	0.29375						0.423756	0.745247	0.338683
		0.575734	0.64162	0.294034						0.423811	0.745793	0.339011
		0.577001	0.641685	0.294318						0.424028	0.746104	0.339338
		0.577725	0.642398	0.294602						0.425284	0.746807	0.339666
		0.577854	0.643006	0.294886						0.425579	0.747909	0.339993
		0.57804	0.643167	0.29517						0.425673	0.750029	0.340321
		0.57853	0.643371	0.295455						0.425716	0.750114	0.340649
		0.578553	0.64475	0.295739						0.426104	0.7506	0.340976
		0.57927	0.645018	0.296023						0.42613	0.751452	0.341304
		0.580552	0.645048	0.296307						0.426498	0.752027	0.341631
		0.580623	0.645516	0.296591						0.426735	0.752742	0.341959
		0.581221	0.647167	0.296875						0.427473	0.753402	0.342286
		0.581325	0.647429	0.297159						0.428245	0.753921	0.342614
		0.58136	0.647634	0.297443						0.429295	0.754301	0.342941
		0.581593	0.647914	0.297727						0.429451	0.754833	0.343269
		0.581674	0.648308	0.298011						0.430128	0.755028	0.343596
		0.582377	0.648604	0.298295						0.430344	0.755579	0.343924
		0.582792	0.649228	0.29858						0.430379	0.756773	0.344252
		0.582792	0.649822	0.298864						0.430805	0.757576	0.344579
		0.58549	0.65138	0.299148						0.430817	0.759489	0.344907
		0.586257	0.651519	0.299432						0.431478	0.760183	0.345234
		0.586595	0.651654	0.299716						0.431574	0.761067	0.345562
		0.58683	0.653295	0.3						0.431655	0.761591	0.345889
		0.587859	0.654833	0.300284						0.432219	0.763	0.346217
		0.590938	0.655036	0.300568						0.433621	0.763353	0.346544
		0.590969	0.655116	0.300852						0.434173	0.763518	0.346872
		0.591013	0.655408	0.301136						0.43446	0.765908	0.347199
		0.591014	0.655854	0.30142						0.435115	0.766123	0.347527
		0.591101	0.656121	0.301705						0.435895	0.766201	0.347855
		0.592151	0.656383	0.301989						0.43602	0.766266	0.348182
		0.592429	0.657048	0.302273						0.436085	0.766622	0.34851
		0.592501	0.657154	0.302557						0.436388	0.767075	0.348837
		0.592597	0.657501	0.302841						0.436884	0.768821	0.349165
		0.592996	0.658198	0.303125						0.437115	0.768885	0.349492
		0.59379	0.658413	0.303409						0.438992	0.770986	0.34982
		0.593811	0.6585	0.303693						0.440727	0.771369	0.350147
		0.594119	0.658602	0.303977						0.441762	0.772073	0.350475
		0.59442	0.658856	0.304261						0.441804	0.773219	0.350802
		0.59451	0.659048	0.304545						0.44229	0.773691	0.35113
		0.594721	0.659928	0.30483						0.442573	0.774441	0.351458
		0.594799	0.660096	0.305114						0.443011	0.775657	0.351785
		0.594834	0.660252	0.305398						0.443098	0.776738	0.352113
		0.595325	0.660352	0.305682						0.443492	0.776829	0.35244
		0.59553	0.660709	0.305966						0.443615	0.77687	0.352768
		0.598277	0.660717	0.30625						0.444271	0.777244	0.353095
		0.598707	0.660816	0.306534						0.444461	0.777778	0.353423
		0.598783	0.660915	0.306818						0.444836	0.778931	0.35375
		0.599197	0.661189	0.307102						0.445632	0.78033	0.354078
		0.5998	0.6614	0.307386						0.446727	0.781198	0.354406
		0.600198	0.661468	0.30767						0.446825	0.781949	0.354733
		0.600509	0.662012	0.307955						0.447642	0.782541	0.355061
		0.600594	0.662192	0.308239						0.447893	0.783242	0.355388
		0.600811	0.662707	0.308523						0.448198	0.783549	0.355716
		0.601112	0.662815	0.308807						0.449591	0.784828	0.356043
		0.601637	0.663046	0.309091						0.449655	0.785299	0.356371
		0.603123	0.663586	0.309375						0.449766	0.785326	0.356698
		0.603129	0.664163	0.309659						0.44997	0.786543	0.357026
		0.603148	0.665141	0.309943						0.450059	0.786782	0.357353
		0.604434	0.66516	0.310227						0.45055	0.787452	0.357681
		0.604512	0.665853	0.310511						0.451667	0.787634	0.358009
		0.604774	0.665919	0.310795						0.451877	0.788305	0.358336
		0.604805	0.666028	0.31108						0.453462	0.789252	0.358664
		0.604828	0.666266	0.311364						0.453718	0.789341	0.358991
		0.60645	0.666695	0.311648						0.454324	0.789996	0.359319
		0.608	0.667315	0.311932						0.454391	0.790035	0.359646
		0.608288	0.66762	0.312216						0.454421	0.791291	0.359974
		0.608744	0.668631	0.3125						0.454958	0.791428	0.360301
		0.610214	0.669012	0.312784						0.455297	0.792664	0.360629
		0.610473	0.669208	0.313068						0.455563	0.792936	0.360956
		0.610486	0.67061	0.313352						0.45577	0.795559	0.361284
		0.610643	0.670919	0.313636						0.456265	0.795836	0.361612
		0.610797	0.671167	0.31392						0.456517	0.79736	0.361939
		0.610942	0.67121	0.314205						0.45711	0.797834	0.362267
		0.610974	0.672082	0.314489						0.457404	0.79801	0.362594
		0.611405	0.673708	0.314773						0.458051	0.798095	0.362922
		0.611835	0.674301	0.315057						0.458098	0.798245	0.363249
		0.612577	0.674942	0.315341						0.458264	0.79918	0.363577
		0.612655	0.675662	0.315625						0.458963	0.799296	0.363904
		0.613406	0.675891	0.315909						0.459553	0.802454	0.364232
		0.613771	0.676192	0.316193						0.459969	0.80247	0.364559
		0.614229	0.676196	0.316477						0.460541	0.802499	0.364887
		0.615219	0.676251	0.316761						0.461946	0.803514	0.365215
		0.615547	0.676359	0.317045						0.462054	0.805136	0.365542
		0.616149	0.677234	0.31733						0.462162	0.806782	0.36587
		0.616303	0.677524	0.317614						0.46249	0.807421	0.366197
		0.616517	0.677528	0.317898						0.46254	0.807655	0.366525
		0.617096	0.678105	0.318182						0.462688	0.807844	0.366852
		0.617203	0.678733	0.318466						0.463131	0.808051	0.36718
		0.617351	0.679592	0.31875						0.463366	0.808059	0.367507
		0.618604	0.679613	0.319034						0.463794	0.808208	0.367835
		0.619242	0.679919	0.319318						0.463902	0.808267	0.368162
		0.619865	0.680965	0.319602						0.464495	0.808529	0.36849
		0.619973	0.681202	0.319886						0.464551	0.808544	0.368818
		0.620282	0.681619	0.32017						0.464917	0.808584	0.369145
		0.620475	0.681701	0.320455						0.465179	0.809782	0.369473
		0.621225	0.681741	0.320739						0.465429	0.810489	0.3698
		0.621976	0.682361	0.321023						0.465491	0.810538	0.370128
		0.622259	0.68237	0.321307						0.465745	0.811891	0.370455
		0.622292	0.684435	0.321591						0.465786	0.812102	0.370783
		0.62242	0.685909	0.321875						0.467203	0.812722	0.37111
		0.623952	0.686272	0.322159						0.469761	0.813563	0.371438
		0.624001	0.687662	0.322443						0.469779	0.81357	0.371765
		0.624658	0.687885	0.322727						0.469921	0.814267	0.372093
		0.624985	0.687914	0.323011						0.470975	0.814888	0.372421
		0.625043	0.688841	0.323295						0.472345	0.816801	0.372748
		0.62653	0.688946	0.32358						0.47263	0.817586	0.373076
		0.627009	0.690205	0.323864						0.472981	0.818296	0.373403
		0.627455	0.69045	0.324148						0.474932	0.81865	0.373731
		0.627778	0.690625	0.324432						0.475165	0.819268	0.374058
		0.629691	0.690883	0.324716						0.4754	0.819419	0.374386
		0.632222	0.692133	0.325						0.475985	0.819772	0.374713
		0.632237	0.692142	0.325284						0.476068	0.820231	0.375041
		0.633226	0.693818	0.325568						0.477571	0.820271	0.375368
		0.633808	0.693933	0.325852						0.477843	0.821479	0.375696
		0.633823	0.694006	0.326136						0.477908	0.821487	0.376024
		0.633837	0.694223	0.32642						0.479601	0.821826	0.376351
		0.635137	0.695037	0.326705						0.479798	0.82339	0.376679
		0.637199	0.695253	0.326989						0.48112	0.82367	0.377006
		0.637504	0.695272	0.327273						0.481682	0.823785	0.377334
		0.637997	0.695409	0.327557						0.481898	0.823871	0.377661
		0.63801	0.696692	0.327841						0.481973	0.825414	0.377989
		0.63862	0.69808	0.328125						0.482119	0.825931	0.378316
		0.638848	0.698258	0.328409						0.482134	0.826638	0.378644
		0.638924	0.698378	0.328693						0.48302	0.827168	0.378972
		0.639255	0.698471	0.328977						0.483986	0.827333	0.379299
		0.639548	0.69852	0.329261						0.484263	0.828917	0.379627
		0.639562	0.698808	0.329545						0.484623	0.829126	0.379954
		0.640042	0.699029	0.32983						0.485619	0.829466	0.380282
		0.643698	0.699197	0.330114						0.486291	0.830982	0.380609
		0.643804	0.699418	0.330398						0.486906	0.831793	0.380937
		0.643991	0.699968	0.330682						0.487108	0.832413	0.381264
		0.644393	0.700219	0.330966						0.487117	0.832419	0.381592
		0.644723	0.700329	0.33125						0.487607	0.833022	0.381919
		0.645345	0.700428	0.331534						0.487961	0.833047	0.382247
		0.645486	0.700497	0.331818						0.488083	0.833145	0.382575
		0.645501	0.700698	0.332102						0.488289	0.833892	0.382902
		0.645638	0.700748	0.332386						0.488643	0.835314	0.38323
		0.646582	0.700779	0.33267						0.488741	0.835432	0.383557
		0.646584	0.700869	0.332955						0.489133	0.835507	0.383885
		0.64666	0.701659	0.333239						0.489461	0.835672	0.384212
		0.647108	0.702172	0.333523						0.48968	0.83585	0.38454
		0.647405	0.702212	0.333807						0.490466	0.835967	0.384867
		0.647957	0.702791	0.334091						0.490529	0.836473	0.385195
		0.648772	0.703401	0.334375						0.490635	0.837406	0.385522
		0.648987	0.703438	0.334659						0.492171	0.839032	0.38585
		0.649505	0.704678	0.334943						0.492814	0.839315	0.386178
		0.650073	0.705134	0.335227						0.492887	0.840343	0.386505
		0.650188	0.705474	0.335511						0.493014	0.84166	0.386833
		0.650758	0.705554	0.335795						0.494525	0.841987	0.38716
		0.650783	0.705573	0.33608						0.494951	0.84224	0.387488
		0.650984	0.70585	0.336364						0.495839	0.842411	0.387815
		0.651075	0.705965	0.336648						0.495978	0.842694	0.388143
		0.65166	0.706354	0.336932						0.496944	0.842974	0.38847
		0.651751	0.706643	0.337216						0.497558	0.845342	0.388798
		0.652156	0.706674	0.3375						0.498067	0.845679	0.389125
		0.653333	0.706714	0.337784						0.499469	0.846409	0.389453
		0.653338	0.706729	0.338068						0.499809	0.847895	0.389781
		0.654493	0.706789	0.338352						0.499961	0.848478	0.390108
		0.655108	0.707464	0.338636						0.499975	0.848573	0.390436
		0.655293	0.707712	0.33892						0.501269	0.84873	0.390763
		0.655445	0.70852	0.339205						0.502363	0.848923	0.391091
		0.655629	0.709183	0.339489						0.505063	0.849685	0.391418
		0.655867	0.709413	0.339773						0.506437	0.850287	0.391746
		0.656401	0.709774	0.340057						0.506852	0.850404	0.392073
		0.656676	0.710295	0.340341						0.507256	0.850463	0.392401
		0.657882	0.710468	0.340625						0.507318	0.85103	0.392728
		0.658107	0.710519	0.340909						0.508356	0.85109	0.393056
		0.658166	0.711186	0.341193						0.509107	0.851619	0.393384
		0.658379	0.711469	0.341477						0.510543	0.85183	0.393711
		0.658597	0.711556	0.341761						0.510856	0.852898	0.394039
		0.6587	0.712306	0.342045						0.511354	0.853511	0.394366
		0.659009	0.712487	0.34233						0.511847	0.853643	0.394694
		0.659218	0.713164	0.342614						0.512324	0.853962	0.395021
		0.659616	0.71347	0.342898						0.512553	0.855118	0.395349
		0.660415	0.71446	0.343182						0.512644	0.855252	0.395676
		0.660728	0.714692	0.343466						0.512847	0.855392	0.396004
		0.660997	0.715354	0.34375						0.513017	0.855773	0.396331
		0.661315	0.716068	0.344034						0.513048	0.856499	0.396659
		0.662797	0.716164	0.344318						0.515041	0.858177	0.396987
		0.664171	0.716207	0.344602						0.515226	0.86081	0.397314
		0.664216	0.716796	0.344886						0.515802	0.860811	0.397642
		0.664662	0.717053	0.34517						0.516044	0.861194	0.397969
		0.664677	0.718068	0.345455						0.516069	0.862752	0.398297
		0.665056	0.718356	0.345739						0.51702	0.862785	0.398624
		0.666015	0.718763	0.346023						0.518649	0.862832	0.398952
		0.666189	0.718851	0.346307						0.518995	0.863414	0.399279
		0.66646	0.718884	0.346591						0.519699	0.864214	0.399607
		0.666666	0.720024	0.346875						0.520081	0.864365	0.399934
		0.666713	0.720104	0.347159						0.520429	0.86466	0.400262
		0.666726	0.720244	0.347443						0.520432	0.864675	0.40059
		0.667571	0.72096	0.347727						0.520759	0.864694	0.400917
		0.667606	0.721495	0.348011						0.522178	0.864719	0.401245
		0.667626	0.721699	0.348295						0.524299	0.864978	0.401572
		0.669368	0.722789	0.34858						0.524427	0.865986	0.4019
		0.669629	0.723053	0.348864						0.524602	0.866091	0.402227
		0.669854	0.723171	0.349148						0.524708	0.867722	0.402555
		0.670262	0.723217	0.349432						0.524898	0.868281	0.402882
		0.670748	0.723244	0.349716						0.524926	0.868618	0.40321
		0.6715	0.724152	0.35						0.525024	0.86893	0.403538
		0.671679	0.724562	0.350284						0.525201	0.869424	0.403865
		0.671956	0.725103	0.350568						0.525258	0.869579	0.404193
		0.672235	0.725514	0.350852						0.525881	0.869735	0.40452
		0.672582	0.72565	0.351136						0.526141	0.870454	0.404848
		0.673065	0.726334	0.35142						0.526327	0.870517	0.405175
		0.673183	0.726915	0.351705						0.526524	0.87082	0.405503
		0.673662	0.727299	0.351989						0.526841	0.871106	0.40583
		0.675397	0.727396	0.352273						0.527398	0.872661	0.406158
		0.675821	0.72753	0.352557						0.527833	0.873698	0.406485
		0.675828	0.727923	0.352841						0.5284	0.87387	0.406813
		0.676212	0.728549	0.353125						0.530156	0.873931	0.407141
		0.676343	0.728917	0.353409						0.530231	0.875508	0.407468
		0.676692	0.729285	0.353693						0.530531	0.876646	0.407796
		0.67676	0.730042	0.353977						0.531192	0.877219	0.408123
		0.67895	0.730425	0.354261						0.531898	0.877247	0.408451
		0.679517	0.731743	0.354545						0.532333	0.878881	0.408778
		0.679631	0.731913	0.35483						0.532346	0.882203	0.409106
		0.680966	0.731994	0.355114						0.532487	0.882406	0.409433
		0.68125	0.732472	0.355398						0.532616	0.883009	0.409761
		0.681462	0.733331	0.355682						0.533733	0.883622	0.410088
		0.681923	0.733389	0.355966						0.533907	0.883941	0.410416
		0.681961	0.733597	0.35625						0.534368	0.885567	0.410744
		0.682159	0.733764	0.356534						0.534914	0.885649	0.411071
		0.682196	0.733774	0.356818						0.535572	0.885871	0.411399
		0.682795	0.733857	0.357102						0.535795	0.887958	0.411726
		0.683525	0.734669	0.357386						0.536168	0.888295	0.412054
		0.683681	0.735008	0.35767						0.536632	0.889149	0.412381
		0.684105	0.735265	0.357955						0.536743	0.88927	0.412709
		0.684376	0.736052	0.358239						0.537971	0.890952	0.413036
		0.685666	0.736772	0.358523						0.538588	0.891518	0.413364
		0.688631	0.737361	0.358807						0.53898	0.891602	0.413691
		0.689398	0.737661	0.359091						0.539267	0.891995	0.414019
		0.689433	0.737917	0.359375						0.539308	0.892129	0.414347
		0.689448	0.738047	0.359659						0.539451	0.89262	0.414674
		0.689996	0.739259	0.359943						0.539777	0.892872	0.415002
		0.690379	0.739538	0.360227						0.540477	0.896392	0.415329
		0.690439	0.73989	0.360511						0.540578	0.898582	0.415657
		0.690676	0.740849	0.360795						0.540667	0.901645	0.415984
		0.691759	0.741498	0.36108						0.540708	0.902219	0.416312
		0.691948	0.742122	0.361364						0.541094	0.902656	0.416639
		0.692057	0.742173	0.361648						0.541138	0.902999	0.416967
		0.69228	0.742265	0.361932						0.541313	0.903931	0.417294
		0.692327	0.742375	0.362216						0.541839	0.90406	0.417622
		0.693202	0.742417	0.3625						0.542022	0.904153	0.41795
		0.693253	0.74334	0.362784						0.54365	0.905821	0.418277
		0.693517	0.743698	0.363068						0.543682	0.906615	0.418605
		0.693636	0.743732	0.363352						0.544503	0.906781	0.418932
		0.693657	0.744262	0.363636						0.544861	0.906793	0.41926
		0.695565	0.744353	0.36392						0.545583	0.907815	0.419587
		0.695869	0.744396	0.364205						0.545953	0.90792	0.419915
		0.695984	0.744802	0.364489						0.545956	0.908609	0.420242
		0.696491	0.744957	0.364773						0.546037	0.909321	0.42057
		0.696531	0.744999	0.365057						0.546037	0.909467	0.420897
		0.697096	0.745153	0.365341						0.546107	0.911309	0.421225
		0.697523	0.745578	0.365625						0.546527	0.911584	0.421553
		0.698673	0.745877	0.365909						0.54701	0.91162	0.42188
		0.698885	0.747175	0.366193						0.547609	0.911919	0.422208
		0.699369	0.747837	0.366477						0.547715	0.912796	0.422535
		0.700276	0.749093	0.366761						0.547721	0.912805	0.422863
		0.700508	0.749429	0.367045						0.54825	0.913282	0.42319
		0.701063	0.749474	0.36733						0.548256	0.913952	0.423518
		0.701866	0.75031	0.367614						0.549083	0.914519	0.423845
		0.702055	0.750586	0.367898						0.549483	0.914821	0.424173
		0.703902	0.750841	0.368182						0.550405	0.915125	0.4245
		0.704581	0.750988	0.368466						0.551297	0.915928	0.424828
		0.704658	0.751104	0.36875						0.551673	0.917318	0.425156
		0.704887	0.751113	0.369034						0.552098	0.917418	0.425483
		0.706128	0.751621	0.369318						0.552759	0.917852	0.425811
		0.706467	0.751989	0.369602						0.552848	0.918156	0.426138
		0.706779	0.752251	0.369886						0.553221	0.918366	0.426466
		0.708849	0.752457	0.37017						0.553667	0.918862	0.426793
		0.709975	0.752899	0.370455						0.554562	0.91941	0.427121
		0.709979	0.753262	0.370739						0.554572	0.920097	0.427448
		0.710454	0.753284	0.371023						0.554953	0.920598	0.427776
		0.710547	0.754159	0.371307						0.555119	0.921038	0.428104
		0.711608	0.754263	0.371591						0.556567	0.921258	0.428431
		0.712448	0.754815	0.371875						0.557013	0.922927	0.428759
		0.712487	0.755494	0.372159						0.557037	0.923381	0.429086
		0.712685	0.756186	0.372443						0.557613	0.924441	0.429414
		0.712915	0.757049	0.372727						0.557941	0.925865	0.429741
		0.714351	0.757441	0.373011						0.558005	0.926525	0.430069
		0.714637	0.758438	0.373295						0.558256	0.9266	0.430396
		0.714845	0.758477	0.37358						0.558378	0.926713	0.430724
		0.714993	0.758725	0.373864						0.559961	0.927796	0.431051
		0.715293	0.759359	0.374148						0.561062	0.929993	0.431379
		0.715724	0.759667	0.374432						0.56115	0.931051	0.431707
		0.715902	0.760194	0.374716						0.561296	0.931343	0.432034
		0.71633	0.76072	0.375						0.561348	0.931718	0.432362
		0.716331	0.76077	0.375284						0.561994	0.933673	0.432689
		0.717767	0.761443	0.375568						0.562895	0.933944	0.433017
		0.718044	0.761598	0.375852						0.562926	0.934072	0.433344
		0.718632	0.761609	0.376136						0.563067	0.934094	0.433672
		0.718861	0.761774	0.37642						0.563207	0.934318	0.433999
		0.718911	0.76386	0.376705						0.563208	0.934949	0.434327
		0.718994	0.764379	0.376989						0.564285	0.936983	0.434654
		0.719298	0.764469	0.377273						0.565166	0.938428	0.434982
		0.719389	0.765406	0.377557						0.565402	0.938867	0.43531
		0.721182	0.765543	0.377841						0.566231	0.940856	0.435637
		0.721323	0.765765	0.378125						0.566863	0.941217	0.435965
		0.722025	0.765975	0.378409						0.56753	0.941511	0.436292
		0.722644	0.766025	0.378693						0.567952	0.942101	0.43662
		0.723424	0.766571	0.378977						0.568714	0.942649	0.436947
		0.72509	0.767607	0.379261						0.568978	0.942944	0.437275
		0.725429	0.767641	0.379545						0.569047	0.943697	0.437602
		0.725485	0.768085	0.37983						0.569383	0.944048	0.43793
		0.725494	0.768212	0.380114						0.56948	0.944058	0.438257
		0.725856	0.768526	0.380398						0.569503	0.944115	0.438585
		0.726431	0.76875	0.380682						0.570052	0.94488	0.438913
		0.726457	0.769399	0.380966						0.571808	0.944908	0.43924
		0.726675	0.770689	0.38125						0.572178	0.946732	0.439568
		0.727918	0.770763	0.381534						0.572207	0.947022	0.439895
		0.728198	0.771041	0.381818						0.572811	0.947351	0.440223
		0.729547	0.772167	0.382102						0.573078	0.948495	0.44055
		0.730065	0.773058	0.382386						0.573326	0.94873	0.440878
		0.730316	0.773857	0.38267						0.573419	0.948941	0.441205
		0.730442	0.774771	0.382955						0.574157	0.949099	0.441533
		0.730896	0.774839	0.383239						0.574306	0.95101	0.44186
		0.732841	0.775408	0.383523						0.5744	0.95111	0.442188
		0.733343	0.77627	0.383807						0.57486	0.951853	0.442516
		0.733916	0.776801	0.384091						0.575351	0.952509	0.442843
		0.734317	0.776916	0.384375						0.575497	0.953393	0.443171
		0.734969	0.777758	0.384659						0.576317	0.953424	0.443498
		0.735481	0.778275	0.384943						0.577155	0.954848	0.443826
		0.736051	0.77838	0.385227						0.577413	0.956076	0.444153
		0.736388	0.778396	0.385511						0.578029	0.957103	0.444481
		0.73651	0.779522	0.385795						0.578119	0.957356	0.444808
		0.737678	0.780142	0.38608						0.57816	0.957668	0.445136
		0.738289	0.782153	0.386364						0.578517	0.957828	0.445463
		0.738383	0.782297	0.386648						0.578762	0.957891	0.445791
		0.738408	0.783077	0.386932						0.579097	0.958928	0.446119
		0.738451	0.784529	0.387216						0.57984	0.95912	0.446446
		0.73856	0.784902	0.3875						0.580966	0.959527	0.446774
		0.741008	0.785283	0.387784						0.581395	0.961032	0.447101
		0.741799	0.785618	0.388068						0.581681	0.961552	0.447429
		0.741858	0.785933	0.388352						0.58236	0.962477	0.447756
		0.741872	0.786195	0.388636						0.582866	0.963307	0.448084
		0.742295	0.786279	0.38892						0.583344	0.963338	0.448411
		0.74294	0.786313	0.389205						0.585693	0.963577	0.448739
		0.743979	0.786341	0.389489						0.586069	0.963993	0.449066
		0.744743	0.786382	0.389773						0.589015	0.964733	0.449394
		0.744907	0.786669	0.390057						0.589444	0.965763	0.449722
		0.745308	0.789444	0.390341						0.590037	0.966344	0.450049
		0.746121	0.789873	0.390625						0.590414	0.96702	0.450377
		0.746931	0.789896	0.390909						0.590466	0.967476	0.450704
		0.746969	0.789937	0.391193						0.591213	0.969543	0.451032
		0.747167	0.790184	0.391477						0.593264	0.970346	0.451359
		0.747805	0.791188	0.391761						0.594006	0.97255	0.451687
		0.747936	0.791244	0.392045						0.594317	0.973441	0.452014
		0.74794	0.792478	0.39233						0.594623	0.973664	0.452342
		0.749396	0.793101	0.392614						0.594708	0.973769	0.45267
		0.750315	0.793132	0.392898						0.595422	0.976397	0.452997
		0.750424	0.793349	0.393182						0.595743	0.977164	0.453325
		0.75108	0.793576	0.393466						0.595873	0.97749	0.453652
		0.75117	0.794118	0.39375						0.595879	0.978877	0.45398
		0.752789	0.794404	0.394034						0.596055	0.979078	0.454307
		0.753043	0.7952	0.394318						0.596455	0.979891	0.454635
		0.754194	0.795497	0.394602						0.597105	0.979903	0.454962
		0.754481	0.795941	0.394886						0.597276	0.979904	0.45529
		0.757495	0.796588	0.39517						0.597534	0.980933	0.455617
		0.757564	0.79698	0.395455						0.597878	0.981539	0.455945
		0.75801	0.79756	0.395739						0.598387	0.983763	0.456273
		0.759254	0.797645	0.396023						0.598434	0.98399	0.4566
		0.760459	0.798378	0.396307						0.598453	0.984495	0.456928
		0.760485	0.798636	0.396591						0.598491	0.984563	0.457255
		0.760716	0.798779	0.396875						0.598501	0.985456	0.457583
		0.761396	0.799663	0.397159						0.59889	0.986367	0.45791
		0.763075	0.800732	0.397443						0.599297	0.986398	0.458238
		0.763492	0.800896	0.397727						0.599437	0.986857	0.458565
		0.763926	0.800898	0.398011						0.599948	0.987876	0.458893
		0.763926	0.801335	0.398295						0.600858	0.988056	0.45922
		0.766038	0.801926	0.39858						0.601415	0.988407	0.459548
		0.766377	0.802392	0.398864						0.601569	0.989107	0.459876
		0.766404	0.802922	0.399148						0.60163	0.989838	0.460203
		0.766764	0.803127	0.399432						0.601921	0.989969	0.460531
		0.766794	0.803498	0.399716						0.602533	0.990109	0.460858
		0.766813	0.804136	0.4						0.60272	0.991118	0.461186
		0.768189	0.805183	0.400284						0.603063	0.991639	0.461513
		0.768228	0.805231	0.400568						0.604589	0.993267	0.461841
		0.768297	0.805381	0.400852						0.604877	0.993817	0.462168
		0.768663	0.805766	0.401136						0.604973	0.995858	0.462496
		0.769124	0.805933	0.40142						0.605887	0.996137	0.462823
		0.769344	0.806181	0.401705						0.605909	0.996989	0.463151
		0.771053	0.807244	0.401989						0.606398	0.998418	0.463479
		0.771891	0.807604	0.402273						0.606828	0.999004	0.463806
		0.771985	0.807888	0.402557						0.607245	1.00053	0.464134
		0.772412	0.808068	0.402841						0.607282	1.00254	0.464461
		0.773015	0.808369	0.403125						0.607379	1.00269	0.464789
		0.773168	0.809288	0.403409						0.607779	1.00511	0.465116
		0.773375	0.809303	0.403693						0.608893	1.00516	0.465444
		0.773598	0.809429	0.403977						0.608966	1.00594	0.465771
		0.774954	0.809736	0.404261						0.609173	1.00693	0.466099
		0.77516	0.810664	0.404545						0.609203	1.00693	0.466426
		0.775235	0.811354	0.40483						0.609728	1.00798	0.466754
		0.775982	0.811603	0.405114						0.61016	1.00863	0.467082
		0.777032	0.812133	0.405398						0.610326	1.01013	0.467409
		0.777796	0.812551	0.405682						0.61099	1.01047	0.467737
		0.77804	0.81304	0.405966						0.612143	1.0125	0.468064
		0.778526	0.813479	0.40625						0.612643	1.0128	0.468392
		0.778713	0.813683	0.406534						0.613805	1.01308	0.468719
		0.778952	0.814143	0.406818						0.613934	1.01324	0.469047
		0.779023	0.815151	0.407102						0.614615	1.01364	0.469374
		0.780286	0.816133	0.407386						0.615139	1.01409	0.469702
		0.781316	0.817052	0.40767						0.615827	1.01422	0.470029
		0.781324	0.817074	0.407955						0.616377	1.01449	0.470357
		0.782268	0.817138	0.408239						0.618017	1.01552	0.470685
		0.783713	0.817303	0.408523						0.618243	1.01562	0.471012
		0.784561	0.81745	0.408807						0.618483	1.01703	0.47134
		0.784578	0.818551	0.409091						0.618507	1.01731	0.471667
		0.785513	0.82026	0.409375						0.619033	1.01781	0.471995
		0.786099	0.82123	0.409659						0.619862	1.01904	0.472322
		0.786164	0.821741	0.409943						0.620046	1.01932	0.47265
		0.786639	0.822606	0.410227						0.620836	1.01955	0.472977
		0.786856	0.822648	0.410511						0.621184	1.02058	0.473305
		0.78737	0.823739	0.410795						0.62121	1.02085	0.473632
		0.787767	0.824033	0.41108						0.621308	1.02131	0.47396
		0.789461	0.825085	0.411364						0.621315	1.02263	0.474288
		0.78964	0.825163	0.411648						0.621943	1.02325	0.474615
		0.789676	0.825286	0.411932						0.622254	1.02364	0.474943
		0.790391	0.826145	0.412216						0.622583	1.02384	0.47527
		0.791324	0.826219	0.4125						0.623527	1.02428	0.475598
		0.791626	0.826338	0.412784						0.62447	1.02635	0.475925
		0.792017	0.826816	0.413068						0.62461	1.02686	0.476253
		0.792428	0.82706	0.413352						0.624624	1.02747	0.47658
		0.79273	0.827183	0.413636						0.625364	1.02805	0.476908
		0.794451	0.827663	0.41392						0.625737	1.02856	0.477236
		0.79469	0.827934	0.414205						0.627627	1.02878	0.477563
		0.795502	0.830436	0.414489						0.628452	1.03155	0.477891
		0.795554	0.831197	0.414773						0.629228	1.03233	0.478218
		0.796211	0.831886	0.415057						0.62981	1.03488	0.478546
		0.796714	0.83292	0.415341						0.630108	1.03533	0.478873
		0.796782	0.833034	0.415625						0.630145	1.03548	0.479201
		0.796988	0.833266	0.415909						0.630309	1.03623	0.479528
		0.797049	0.833475	0.416193						0.630982	1.03666	0.479856
		0.797141	0.834182	0.416477						0.6328	1.03698	0.480183
		0.797399	0.835032	0.416761						0.632812	1.03795	0.480511
		0.797598	0.835458	0.417045						0.6329	1.0385	0.480839
		0.797869	0.837449	0.41733						0.633175	1.04073	0.481166
		0.799169	0.838061	0.417614						0.633839	1.04124	0.481494
		0.799549	0.838118	0.417898						0.634139	1.04271	0.481821
		0.800127	0.838311	0.418182						0.634224	1.04357	0.482149
		0.800929	0.838672	0.418466						0.634565	1.04358	0.482476
		0.801951	0.838848	0.41875						0.635687	1.04383	0.482804
		0.802391	0.839693	0.419034						0.636043	1.04404	0.483131
		0.803102	0.8405	0.419318						0.636184	1.0444	0.483459
		0.803278	0.840718	0.419602						0.636589	1.04499	0.483786
		0.803386	0.841223	0.419886						0.637195	1.04517	0.484114
		0.804849	0.841257	0.42017						0.637206	1.04541	0.484442
		0.805624	0.842002	0.420455						0.637371	1.04659	0.484769
		0.806346	0.843237	0.420739						0.637843	1.04744	0.485097
		0.807215	0.843395	0.421023						0.637876	1.04933	0.485424
		0.807311	0.843853	0.421307						0.637917	1.05014	0.485752
		0.807436	0.844894	0.421591						0.637955	1.05021	0.486079
		0.807709	0.84501	0.421875						0.638136	1.05119	0.486407
		0.808017	0.84537	0.422159						0.639581	1.05281	0.486734
		0.808091	0.845481	0.422443						0.639648	1.05313	0.487062
		0.809499	0.845807	0.422727						0.639668	1.05419	0.487389
		0.809622	0.846092	0.423011						0.639921	1.05457	0.487717
		0.810366	0.846324	0.423295						0.639994	1.05516	0.488045
		0.810588	0.846696	0.42358						0.641034	1.0555	0.488372
		0.810816	0.847322	0.423864						0.641984	1.05619	0.4887
		0.81107	0.848153	0.424148						0.641986	1.05671	0.489027
		0.811764	0.848526	0.424432						0.643371	1.05672	0.489355
		0.811851	0.848569	0.424716						0.643715	1.05726	0.489682
		0.81194	0.848577	0.425						0.643877	1.05769	0.49001
		0.812313	0.84885	0.425284						0.644611	1.058	0.490337
		0.812529	0.849113	0.425568						0.644712	1.05875	0.490665
		0.812599	0.85001	0.425852						0.644808	1.05981	0.490992
		0.813133	0.850521	0.426136						0.645261	1.06014	0.49132
		0.813694	0.851777	0.42642						0.64546	1.0605	0.491648
		0.81377	0.852403	0.426705						0.645779	1.06068	0.491975
		0.81504	0.852415	0.426989						0.646626	1.06122	0.492303
		0.815985	0.852451	0.427273						0.646964	1.06185	0.49263
		0.816221	0.852542	0.427557						0.647021	1.06185	0.492958
		0.816405	0.852692	0.427841						0.6481	1.06276	0.493285
		0.817639	0.852784	0.428125						0.648524	1.06304	0.493613
		0.817893	0.853547	0.428409						0.648534	1.06334	0.49394
		0.818694	0.85497	0.428693						0.650879	1.06344	0.494268
		0.819687	0.855058	0.428977						0.651269	1.0638	0.494595
		0.820293	0.855639	0.429261						0.652095	1.06424	0.494923
		0.820302	0.85663	0.429545						0.652241	1.06678	0.495251
		0.822959	0.856634	0.42983						0.652338	1.06781	0.495578
		0.823314	0.857463	0.430114						0.65384	1.06804	0.495906
		0.823344	0.858221	0.430398						0.654691	1.06882	0.496233
		0.823627	0.858439	0.430682						0.654782	1.06894	0.496561
		0.824295	0.858984	0.430966						0.656213	1.07006	0.496888
		0.825564	0.859447	0.43125						0.656588	1.0705	0.497216
		0.825782	0.859527	0.431534						0.656917	1.07086	0.497543
		0.826363	0.859554	0.431818						0.657583	1.0718	0.497871
		0.826903	0.860685	0.432102						0.658247	1.07301	0.498198
		0.829172	0.860975	0.432386						0.659808	1.07317	0.498526
		0.83067	0.861927	0.43267						0.660725	1.07413	0.498854
		0.831032	0.862583	0.432955						0.660738	1.0744	0.499181
		0.831267	0.862982	0.433239						0.660755	1.07508	0.499509
		0.832122	0.863595	0.433523						0.663099	1.0751	0.499836
		0.832736	0.864721	0.433807						0.663786	1.07586	0.500164
		0.833772	0.864768	0.434091						0.663884	1.07661	0.500491
		0.834105	0.865228	0.434375						0.66391	1.07993	0.500819
		0.834331	0.866074	0.434659						0.664175	1.0802	0.501146
		0.834578	0.866272	0.434943						0.664779	1.0813	0.501474
		0.834773	0.867463	0.435227						0.665635	1.08252	0.501802
		0.83524	0.867538	0.435511						0.665807	1.08278	0.502129
		0.836475	0.868486	0.435795						0.666114	1.08313	0.502457
		0.837248	0.869125	0.43608						0.666125	1.08338	0.502784
		0.838348	0.86935	0.436364						0.667187	1.08353	0.503112
		0.840799	0.870879	0.436648						0.66733	1.08405	0.503439
		0.841424	0.872317	0.436932						0.668231	1.08555	0.503767
		0.84172	0.872837	0.437216						0.6692	1.08582	0.504094
		0.841764	0.873036	0.4375						0.669835	1.08591	0.504422
		0.841868	0.873411	0.437784						0.670845	1.08769	0.504749
		0.842016	0.873606	0.438068						0.670941	1.08854	0.505077
		0.842571	0.873762	0.438352						0.671381	1.09073	0.505405
		0.842772	0.87434	0.438636						0.671557	1.09196	0.505732
		0.843366	0.874435	0.43892						0.672026	1.09371	0.50606
		0.844282	0.874526	0.439205						0.6725	1.0941	0.506387
		0.845751	0.876856	0.439489						0.672541	1.09582	0.506715
		0.846511	0.878691	0.439773						0.672933	1.09637	0.507042
		0.849968	0.879197	0.440057						0.672949	1.09827	0.50737
		0.8501	0.879455	0.440341						0.673983	1.09877	0.507697
		0.851491	0.87967	0.440625						0.675644	1.09921	0.508025
		0.85229	0.879845	0.440909						0.67659	1.1003	0.508352
		0.852384	0.879896	0.441193						0.677328	1.10125	0.50868
		0.852692	0.881639	0.441477						0.677757	1.1013	0.509008
		0.853254	0.882633	0.441761						0.677762	1.10156	0.509335
		0.853613	0.882754	0.442045						0.678348	1.1029	0.509663
		0.854612	0.883763	0.44233						0.678539	1.10379	0.50999
		0.854635	0.884609	0.442614						0.678621	1.1039	0.510318
		0.854797	0.885148	0.442898						0.679073	1.10474	0.510645
		0.854909	0.886817	0.443182						0.679859	1.10486	0.510973
		0.855536	0.889638	0.443466						0.680201	1.10487	0.5113
		0.855839	0.890204	0.44375						0.680717	1.10506	0.511628
		0.855875	0.89169	0.444034						0.680831	1.10667	0.511955
		0.856296	0.892047	0.444318						0.681654	1.10669	0.512283
		0.857011	0.89223	0.444602						0.68362	1.10809	0.512611
		0.857099	0.893028	0.444886						0.683901	1.1082	0.512938
		0.858269	0.893242	0.44517						0.684653	1.10837	0.513266
		0.859081	0.8933	0.445455						0.684828	1.11002	0.513593
		0.860558	0.893311	0.445739						0.685659	1.11057	0.513921
		0.860794	0.893387	0.446023						0.685888	1.11072	0.514248
		0.860991	0.894157	0.446307						0.686786	1.11235	0.514576
		0.861987	0.89519	0.446591						0.687161	1.11261	0.514903
		0.863329	0.895365	0.446875						0.687264	1.11348	0.515231
		0.86387	0.896732	0.447159						0.687857	1.11416	0.515558
		0.865	0.899487	0.447443						0.688372	1.11449	0.515886
		0.866123	0.900927	0.447727						0.689643	1.11623	0.516214
		0.866227	0.900966	0.448011						0.689941	1.11645	0.516541
		0.866964	0.901532	0.448295						0.689945	1.11657	0.516869
		0.866967	0.901898	0.44858						0.690046	1.11675	0.517196
		0.868088	0.902893	0.448864						0.691845	1.11683	0.517524
		0.868839	0.902924	0.449148						0.691865	1.11721	0.517851
		0.869567	0.903103	0.449432						0.69188	1.11787	0.518179
		0.869598	0.903124	0.449716						0.692303	1.11814	0.518506
		0.870549	0.903206	0.45						0.694161	1.1192	0.518834
		0.871545	0.903552	0.450284						0.694445	1.11958	0.519161
		0.871573	0.903757	0.450568						0.69484	1.11961	0.519489
		0.871688	0.904379	0.450852						0.694998	1.12001	0.519817
		0.872362	0.906136	0.451136						0.695143	1.1211	0.520144
		0.872616	0.906836	0.45142						0.695657	1.12143	0.520472
		0.872667	0.907445	0.451705						0.69587	1.12172	0.520799
		0.873565	0.907482	0.451989						0.69656	1.12201	0.521127
		0.873769	0.907553	0.452273						0.697094	1.12327	0.521454
		0.874321	0.907836	0.452557						0.697286	1.12334	0.521782
		0.874539	0.908588	0.452841						0.697398	1.12409	0.522109
		0.875552	0.908932	0.453125						0.697859	1.1244	0.522437
		0.876513	0.909617	0.453409						0.698917	1.12627	0.522764
		0.876984	0.909941	0.453693						0.699374	1.12631	0.523092
		0.877028	0.909973	0.453977						0.699865	1.12764	0.52342
		0.877314	0.909994	0.454261						0.700687	1.12896	0.523747
		0.877411	0.910485	0.454545						0.70161	1.12922	0.524075
		0.877664	0.910613	0.45483						0.702567	1.12958	0.524402
		0.878329	0.910726	0.455114						0.703249	1.13018	0.52473
		0.878413	0.911951	0.455398						0.703482	1.13042	0.525057
		0.878569	0.912186	0.455682						0.70369	1.13288	0.525385
		0.88025	0.912224	0.455966						0.704265	1.13292	0.525712
		0.880658	0.912527	0.45625						0.705579	1.13293	0.52604
		0.8807	0.913104	0.456534						0.706491	1.13387	0.526368
		0.881091	0.913391	0.456818						0.706985	1.1345	0.526695
		0.882211	0.913562	0.457102						0.707695	1.13578	0.527023
		0.883193	0.915536	0.457386						0.707733	1.13593	0.52735
		0.88371	0.915584	0.45767						0.70783	1.1374	0.527678
		0.886415	0.91591	0.457955						0.707856	1.13765	0.528005
		0.886472	0.916112	0.458239						0.70912	1.13812	0.528333
		0.887129	0.916782	0.458523						0.710485	1.13919	0.52866
		0.887132	0.916799	0.458807						0.710546	1.13938	0.528988
		0.887183	0.917622	0.459091						0.711253	1.13945	0.529315
		0.887562	0.91881	0.459375						0.711301	1.14122	0.529643
		0.887565	0.918904	0.459659						0.711364	1.14188	0.529971
		0.887662	0.919137	0.459943						0.712044	1.14228	0.530298
		0.888056	0.919741	0.460227						0.712448	1.14341	0.530626
		0.888638	0.919762	0.460511						0.712571	1.14389	0.530953
		0.889046	0.921518	0.460795						0.713076	1.14461	0.531281
		0.889953	0.922093	0.46108						0.713124	1.14509	0.531608
		0.890271	0.922133	0.461364						0.713724	1.14562	0.531936
		0.891901	0.922687	0.461648						0.714117	1.147	0.532263
		0.892221	0.923003	0.461932						0.714137	1.14762	0.532591
		0.892629	0.924104	0.462216						0.714268	1.14904	0.532918
		0.89294	0.92453	0.4625						0.714291	1.14998	0.533246
		0.893189	0.924851	0.462784						0.714609	1.15023	0.533574
		0.894305	0.925496	0.463068						0.714694	1.15052	0.533901
		0.896141	0.92562	0.463352						0.715416	1.15293	0.534229
		0.896576	0.926606	0.463636						0.715596	1.15413	0.534556
		0.896692	0.92663	0.46392						0.715912	1.15529	0.534884
		0.897149	0.928176	0.464205						0.716231	1.15532	0.535211
		0.897947	0.928296	0.464489						0.716231	1.15722	0.535539
		0.899274	0.928664	0.464773						0.71642	1.15726	0.535866
		0.899803	0.929728	0.465057						0.717	1.15739	0.536194
		0.901739	0.931008	0.465341						0.717561	1.15791	0.536521
		0.90175	0.931572	0.465625						0.717783	1.15883	0.536849
		0.902037	0.931952	0.465909						0.717868	1.1599	0.537177
		0.902133	0.932761	0.466193						0.717982	1.16025	0.537504
		0.902509	0.934587	0.466477						0.718409	1.16041	0.537832
		0.903214	0.934744	0.466761						0.718644	1.16175	0.538159
		0.903882	0.934839	0.467045						0.719892	1.16257	0.538487
		0.904186	0.936059	0.46733						0.721245	1.16291	0.538814
		0.904596	0.936291	0.467614						0.721389	1.16319	0.539142
		0.905135	0.936946	0.467898						0.721688	1.16361	0.539469
		0.906027	0.937339	0.468182						0.722606	1.16371	0.539797
		0.906704	0.937908	0.468466						0.723022	1.1652	0.540124
		0.909765	0.938283	0.46875						0.723113	1.16526	0.540452
		0.91	0.938449	0.469034						0.723637	1.16677	0.54078
		0.912043	0.938799	0.469318						0.723768	1.16726	0.541107
		0.913409	0.938811	0.469602						0.723783	1.16746	0.541435
		0.913665	0.939432	0.469886						0.724631	1.16809	0.541762
		0.913888	0.940618	0.47017						0.72616	1.169	0.54209
		0.913947	0.940744	0.470455						0.726428	1.16997	0.542417
		0.915383	0.940958	0.470739						0.727554	1.16998	0.542745
		0.915821	0.941131	0.471023						0.728272	1.17047	0.543072
		0.91784	0.941202	0.471307						0.728306	1.17334	0.5434
		0.918531	0.941247	0.471591						0.73016	1.17508	0.543727
		0.919869	0.942362	0.471875						0.730314	1.17665	0.544055
		0.920927	0.942514	0.472159						0.730564	1.17715	0.544383
		0.922754	0.945164	0.472443						0.731159	1.17747	0.54471
		0.922785	0.945523	0.472727						0.732179	1.17777	0.545038
		0.924148	0.946234	0.473011						0.732411	1.17885	0.545365
		0.924387	0.948302	0.473295						0.732852	1.18087	0.545693
		0.927632	0.949358	0.47358						0.734322	1.18116	0.54602
		0.928363	0.949522	0.473864						0.734608	1.18123	0.546348
		0.929083	0.950737	0.474148						0.734917	1.1822	0.546675
		0.929856	0.95098	0.474432						0.735127	1.18255	0.547003
		0.929963	0.951394	0.474716						0.7352	1.18395	0.54733
		0.930249	0.952888	0.475						0.735416	1.18434	0.547658
		0.930395	0.953216	0.475284						0.735538	1.18476	0.547986
		0.93071	0.9547	0.475568						0.73565	1.18541	0.548313
		0.931813	0.955365	0.475852						0.735794	1.18572	0.548641
		0.931927	0.955946	0.476136						0.736238	1.18595	0.548968
		0.935501	0.956709	0.47642						0.736516	1.18599	0.549296
		0.936392	0.957018	0.476705						0.736571	1.18692	0.549623
		0.936942	0.957567	0.476989						0.738955	1.18738	0.549951
		0.936988	0.958565	0.477273						0.740072	1.18779	0.550278
		0.937635	0.959029	0.477557						0.740272	1.18911	0.550606
		0.938248	0.959114	0.477841						0.740448	1.19024	0.550934
		0.9389	0.959654	0.478125						0.7422	1.19094	0.551261
		0.939009	0.960007	0.478409						0.742511	1.19094	0.551589
		0.94084	0.960735	0.478693						0.742682	1.19108	0.551916
		0.942982	0.961227	0.478977						0.742759	1.19158	0.552244
		0.943142	0.961497	0.479261						0.742883	1.19238	0.552571
		0.943249	0.962182	0.479545						0.74302	1.19249	0.552899
		0.943712	0.962717	0.47983						0.744076	1.19283	0.553226
		0.94414	0.962816	0.480114						0.744261	1.19448	0.553554
		0.944248	0.962865	0.480398						0.744304	1.19648	0.553881
		0.946798	0.962931	0.480682						0.74444	1.19671	0.554209
		0.948011	0.963786	0.480966						0.744497	1.19741	0.554537
		0.948861	0.965392	0.48125						0.744505	1.19742	0.554864
		0.949222	0.965537	0.481534						0.744647	1.19881	0.555192
		0.949647	0.965734	0.481818						0.744717	1.20086	0.555519
		0.94976	0.967039	0.482102						0.74493	1.20109	0.555847
		0.950888	0.967064	0.482386						0.746014	1.20141	0.556174
		0.951684	0.967492	0.48267						0.746034	1.20214	0.556502
		0.951931	0.967902	0.482955						0.746912	1.20273	0.556829
		0.952236	0.970119	0.483239						0.747719	1.20363	0.557157
		0.952823	0.970427	0.483523						0.748484	1.20407	0.557484
		0.953934	0.970433	0.483807						0.748831	1.20573	0.557812
		0.955352	0.970821	0.484091						0.748883	1.20612	0.55814
		0.955865	0.971286	0.484375						0.748925	1.20688	0.558467
		0.956361	0.972148	0.484659						0.748925	1.20696	0.558795
		0.956445	0.973617	0.484943						0.749731	1.20801	0.559122
		0.956644	0.973924	0.485227						0.750096	1.20801	0.55945
		0.9576	0.974492	0.485511						0.750323	1.20815	0.559777
		0.957776	0.974852	0.485795						0.750959	1.20984	0.560105
		0.957867	0.975949	0.48608						0.752409	1.21306	0.560432
		0.958372	0.976342	0.486364						0.752643	1.21394	0.56076
		0.958532	0.976449	0.486648						0.75284	1.21427	0.561087
		0.958977	0.976755	0.486932						0.753289	1.2145	0.561415
		0.959086	0.977245	0.487216						0.754257	1.21483	0.561743
		0.959806	0.977507	0.4875						0.754343	1.21484	0.56207
		0.962244	0.977597	0.487784						0.755382	1.21554	0.562398
		0.962446	0.977811	0.488068						0.756387	1.21922	0.562725
		0.962732	0.978555	0.488352						0.756677	1.21926	0.563053
		0.962748	0.978627	0.488636						0.756857	1.21948	0.56338
		0.963212	0.979254	0.48892						0.75749	1.22012	0.563708
		0.963297	0.979346	0.489205						0.758178	1.22027	0.564035
		0.963593	0.980465	0.489489						0.758653	1.22036	0.564363
		0.96529	0.980753	0.489773						0.761202	1.2217	0.56469
		0.965651	0.981456	0.490057						0.76154	1.222	0.565018
		0.966033	0.981537	0.490341						0.762306	1.22243	0.565346
		0.966741	0.98306	0.490625						0.762341	1.22305	0.565673
		0.967499	0.983094	0.490909						0.762546	1.22403	0.566001
		0.967979	0.983173	0.491193						0.762701	1.22411	0.566328
		0.96853	0.983385	0.491477						0.762992	1.22412	0.566656
		0.968734	0.984109	0.491761						0.764633	1.22433	0.566983
		0.970916	0.98443	0.492045						0.765656	1.22532	0.567311
		0.971186	0.984502	0.49233						0.766377	1.22568	0.567638
		0.973301	0.98465	0.492614						0.766423	1.22963	0.567966
		0.974228	0.985339	0.492898						0.766647	1.22993	0.568293
		0.975604	0.985455	0.493182						0.767988	1.23099	0.568621
		0.975917	0.985763	0.493466						0.769795	1.23365	0.568949
		0.97604	0.985805	0.49375						0.774613	1.2339	0.569276
		0.977884	0.985933	0.494034						0.774639	1.2339	0.569604
		0.978053	0.986619	0.494318						0.774826	1.23446	0.569931
		0.978282	0.987558	0.494602						0.77531	1.23594	0.570259
		0.978386	0.988575	0.494886						0.776919	1.23912	0.570586
		0.979095	0.9886	0.49517						0.777871	1.23987	0.570914
		0.98066	0.988682	0.495455						0.777949	1.24006	0.571241
		0.981423	0.988927	0.495739						0.777961	1.24062	0.571569
		0.981506	0.990243	0.496023						0.779645	1.24192	0.571896
		0.98313	0.990654	0.496307						0.779658	1.24256	0.572224
		0.983684	0.991032	0.496591						0.781295	1.24294	0.572552
		0.985844	0.991563	0.496875						0.782275	1.24789	0.572879
		0.987342	0.992078	0.497159						0.782818	1.25083	0.573207
		0.988094	0.99361	0.497443						0.782964	1.25149	0.573534
		0.988164	0.993884	0.497727						0.783581	1.25151	0.573862
		0.988866	0.994257	0.498011						0.7838	1.25158	0.574189
		0.988868	0.996855	0.498295						0.784998	1.25173	0.574517
		0.995189	0.99785	0.49858						0.785113	1.25453	0.574844
		0.995827	0.9979	0.498864						0.785758	1.26045	0.575172
		0.996835	0.998389	0.499148						0.786095	1.26129	0.5755
		0.996998	0.999138	0.499432						0.786878	1.26249	0.575827
		0.997445	0.99936	0.499716						0.787126	1.26331	0.576155
		0.997671	0.999495	0.5						0.787726	1.26341	0.576482
		1.00233	1.0005	0.500284						0.788226	1.26513	0.57681
		1.00237	1.00064	0.500568						0.788695	1.26545	0.577137
		1.00255	1.00084	0.500852						0.788823	1.26563	0.577465
		1.00331	1.00266	0.501136						0.789078	1.26583	0.577792
		1.00681	1.00346	0.50142						0.789105	1.26598	0.57812
		1.00734	1.0039	0.501705						0.789294	1.26689	0.578447
		1.00977	1.00553	0.501989						0.789495	1.26821	0.578775
		1.01053	1.0068	0.502273						0.789585	1.26878	0.579103
		1.01149	1.00875	0.502557						0.790339	1.26967	0.57943
		1.01202	1.00883	0.502841						0.790877	1.27135	0.579758
		1.01364	1.00989	0.503125						0.790987	1.2714	0.580085
		1.01372	1.01086	0.503409						0.791484	1.27143	0.580413
		1.01529	1.01136	0.503693						0.79227	1.27157	0.58074
		1.01529	1.01169	0.503977						0.793341	1.27217	0.581068
		1.01615	1.01213	0.504261						0.793655	1.27219	0.581395
		1.01816	1.0128	0.504545						0.795709	1.27234	0.581723
		1.01891	1.01286	0.50483						0.797192	1.27347	0.58205
		1.01973	1.0132	0.505114						0.797554	1.2736	0.582378
		1.02074	1.0136	0.505398						0.797574	1.2745	0.582706
		1.0213	1.01437	0.505682						0.797667	1.2754	0.583033
		1.02145	1.01439	0.505966						0.797988	1.27568	0.583361
		1.02185	1.01506	0.50625						0.798898	1.27636	0.583688
		1.02226	1.01575	0.506534						0.799799	1.27767	0.584016
		1.0228	1.01584	0.506818						0.800814	1.27778	0.584343
		1.02339	1.01642	0.507102						0.801877	1.27783	0.584671
		1.02359	1.01663	0.507386						0.802329	1.27829	0.584998
		1.02429	1.01723	0.50767						0.803661	1.27843	0.585326
		1.02522	1.01777	0.507955						0.804076	1.27951	0.585653
		1.02582	1.01856	0.508239						0.806003	1.28029	0.585981
		1.02596	1.02151	0.508523						0.806413	1.28105	0.586309
		1.0269	1.0216	0.508807						0.807231	1.28152	0.586636
		1.02832	1.0216	0.509091						0.808222	1.28243	0.586964
		1.02919	1.02176	0.509375						0.809992	1.28274	0.587291
		1.03362	1.02193	0.509659						0.810194	1.28312	0.587619
		1.03469	1.02205	0.509943						0.81056	1.28418	0.587946
		1.03494	1.02212	0.510227						0.811824	1.2876	0.588274
		1.0357	1.02214	0.510511						0.812021	1.28781	0.588601
		1.03634	1.02242	0.510795						0.812194	1.28837	0.588929
		1.03648	1.02279	0.51108						0.81428	1.28862	0.589256
		1.03654	1.02291	0.511364						0.815473	1.2896	0.589584
		1.03665	1.02344	0.511648						0.815801	1.29058	0.589912
		1.03881	1.0235	0.511932						0.816223	1.29317	0.590239
		1.0389	1.02363	0.512216						0.816295	1.29395	0.590567
		1.0398	1.02437	0.5125						0.817944	1.29453	0.590894
		1.04111	1.0247	0.512784						0.819913	1.29465	0.591222
		1.04221	1.0254	0.513068						0.820034	1.29702	0.591549
		1.04285	1.02542	0.513352						0.820375	1.30094	0.591877
		1.043	1.02675	0.513636						0.820477	1.30188	0.592204
		1.04397	1.02784	0.51392						0.820874	1.30345	0.592532
		1.04413	1.02808	0.514205						0.821513	1.30566	0.592859
		1.04413	1.02825	0.514489						0.822223	1.30794	0.593187
		1.04582	1.02898	0.514773						0.822618	1.30916	0.593515
		1.04743	1.02898	0.515057						0.824963	1.30926	0.593842
		1.04772	1.03017	0.515341						0.825209	1.3094	0.59417
		1.04806	1.03031	0.515625						0.82529	1.30967	0.594497
		1.04858	1.03301	0.515909						0.825706	1.30969	0.594825
		1.04959	1.03321	0.516193						0.825714	1.31061	0.595152
		1.05085	1.03353	0.516477						0.826472	1.31132	0.59548
		1.05095	1.03379	0.516761						0.827294	1.31479	0.595807
		1.05095	1.03396	0.517045						0.827807	1.31545	0.596135
		1.05189	1.03447	0.51733						0.828033	1.31582	0.596462
		1.05345	1.03482	0.517614						0.830536	1.31625	0.59679
		1.05505	1.0355	0.517898						0.830753	1.31807	0.597118
		1.05665	1.03577	0.518182						0.834417	1.31931	0.597445
		1.05692	1.03607	0.518466						0.834557	1.31967	0.597773
		1.05693	1.03655	0.51875						0.83463	1.32046	0.5981
		1.05786	1.03692	0.519034						0.835601	1.32157	0.598428
		1.05842	1.03785	0.519318						0.836853	1.32239	0.598755
		1.05915	1.03916	0.519602						0.838097	1.32403	0.599083
		1.05922	1.04	0.519886						0.838443	1.32561	0.59941
		1.05966	1.04052	0.52017						0.838813	1.3258	0.599738
		1.06013	1.04115	0.520455						0.839487	1.32633	0.600066
		1.06056	1.04131	0.520739						0.839694	1.33122	0.600393
		1.06068	1.04176	0.521023						0.840616	1.33178	0.600721
		1.06415	1.04209	0.521307						0.841586	1.33232	0.601048
		1.06498	1.04238	0.521591						0.842597	1.33478	0.601376
		1.06512	1.04273	0.521875						0.843537	1.33612	0.601703
		1.06512	1.04323	0.522159						0.843991	1.33632	0.602031
		1.06662	1.04366	0.522443						0.844138	1.33637	0.602358
		1.06682	1.04578	0.522727						0.844365	1.33662	0.602686
		1.06722	1.04619	0.523011						0.844862	1.34364	0.603013
		1.06843	1.0475	0.523295						0.845123	1.34432	0.603341
		1.06877	1.04816	0.52358						0.846396	1.34501	0.603669
		1.06896	1.04949	0.523864						0.847863	1.34787	0.603996
		1.06911	1.05043	0.524148						0.849844	1.34882	0.604324
		1.06919	1.05096	0.524432						0.849848	1.3506	0.604651
		1.07176	1.05183	0.524716						0.850516	1.3511	0.604979
		1.07292	1.05257	0.525						0.850978	1.35299	0.605306
		1.07295	1.0533	0.525284						0.851481	1.35331	0.605634
		1.07333	1.05338	0.525568						0.8519	1.35463	0.605961
		1.0737	1.05354	0.525852						0.852789	1.35605	0.606289
		1.07387	1.05403	0.526136						0.853037	1.35691	0.606616
		1.07439	1.05482	0.52642						0.853202	1.35732	0.606944
		1.07444	1.05513	0.526705						0.85548	1.35842	0.607272
		1.07507	1.05529	0.526989						0.856115	1.35954	0.607599
		1.07595	1.05592	0.527273						0.856237	1.36201	0.607927
		1.07634	1.05625	0.527557						0.856317	1.36276	0.608254
		1.07789	1.05681	0.527841						0.856787	1.3659	0.608582
		1.07832	1.05727	0.528125						0.856971	1.36726	0.608909
		1.07914	1.05811	0.528409						0.857364	1.36735	0.609237
		1.07929	1.05884	0.528693						0.857371	1.36973	0.609564
		1.08063	1.05942	0.528977						0.858924	1.36978	0.609892
		1.08135	1.06112	0.529261						0.858927	1.37034	0.610219
		1.08171	1.06115	0.529545						0.859373	1.37036	0.610547
		1.08183	1.06362	0.52983						0.85942	1.37238	0.610875
		1.08231	1.0644	0.530114						0.85942	1.37351	0.611202
		1.08294	1.06468	0.530398						0.86068	1.37372	0.61153
		1.08304	1.0647	0.530682						0.861233	1.37391	0.611857
		1.08564	1.06625	0.530966						0.861371	1.37396	0.612185
		1.0862	1.06688	0.53125						0.862617	1.37488	0.612512
		1.08646	1.06756	0.531534						0.862903	1.37553	0.61284
		1.08674	1.06788	0.531818						0.863229	1.37607	0.613167
		1.08698	1.06881	0.532102						0.865065	1.37674	0.613495
		1.08778	1.0696	0.532386						0.865288	1.37782	0.613822
		1.08849	1.07064	0.53267						0.865329	1.37868	0.61415
		1.08892	1.07119	0.532955						0.867409	1.37898	0.614478
		1.09085	1.07194	0.533239						0.867537	1.37908	0.614805
		1.09155	1.07211	0.533523						0.867645	1.37922	0.615133
		1.09282	1.07224	0.533807						0.868642	1.38053	0.61546
		1.09353	1.07244	0.534091						0.868789	1.38138	0.615788
		1.09364	1.07292	0.534375						0.868892	1.38185	0.616115
		1.09386	1.07302	0.534659						0.86934	1.38215	0.616443
		1.09522	1.07353	0.534943						0.869369	1.38255	0.61677
		1.09602	1.07407	0.535227						0.871042	1.384	0.617098
		1.09602	1.07553	0.535511						0.871705	1.38552	0.617425
		1.09604	1.0765	0.535795						0.8718	1.38688	0.617753
		1.09782	1.07784	0.53608						0.871834	1.38796	0.618081
		1.09787	1.07788	0.536364						0.872692	1.38849	0.618408
		1.09845	1.07821	0.536648						0.873148	1.38873	0.618736
		1.09848	1.07883	0.536932						0.873282	1.38904	0.619063
		1.09924	1.07893	0.537216						0.874051	1.38918	0.619391
		1.09978	1.07948	0.5375						0.876454	1.39061	0.619718
		1.0999	1.08056	0.537784						0.878258	1.39072	0.620046
		1.10063	1.08115	0.538068						0.879507	1.39124	0.620373
		1.10173	1.08125	0.538352						0.879865	1.39293	0.620701
		1.10493	1.0821	0.538636						0.880014	1.39306	0.621028
		1.10638	1.08323	0.53892						0.881575	1.39505	0.621356
		1.10788	1.08409	0.539205						0.88185	1.39667	0.621684
		1.10891	1.0842	0.539489						0.881988	1.3975	0.622011
		1.10918	1.08439	0.539773						0.882682	1.39804	0.622339
		1.1093	1.08485	0.540057						0.883065	1.40035	0.622666
		1.11071	1.08603	0.540341						0.884213	1.40148	0.622994
		1.11133	1.08622	0.540625						0.8846	1.40193	0.623321
		1.11337	1.08799	0.540909						0.88721	1.40236	0.623649
		1.11364	1.08911	0.541193						0.887221	1.40265	0.623976
		1.11503	1.09032	0.541477						0.88763	1.40374	0.624304
		1.11527	1.09069	0.541761						0.887669	1.4059	0.624632
		1.11735	1.09103	0.542045						0.888384	1.40728	0.624959
		1.11865	1.09109	0.54233						0.88849	1.4076	0.625287
		1.11932	1.09252	0.542614						0.890361	1.40808	0.625614
		1.11997	1.09386	0.542898						0.890981	1.40839	0.625942
		1.12075	1.0942	0.543182						0.892361	1.40896	0.626269
		1.12098	1.09459	0.543466						0.892425	1.40916	0.626597
		1.12111	1.09522	0.54375						0.892473	1.41043	0.626924
		1.12194	1.09545	0.544034						0.892574	1.41307	0.627252
		1.12227	1.09555	0.544318						0.893162	1.41358	0.627579
		1.12233	1.09655	0.544602						0.894894	1.41411	0.627907
		1.12275	1.09906	0.544886						0.895553	1.41599	0.628235
		1.12293	1.09929	0.54517						0.896557	1.41622	0.628562
		1.12412	1.09938	0.545455						0.89895	1.41686	0.62889
		1.12414	1.0996	0.545739						0.899267	1.41709	0.629217
		1.12535	1.09991	0.546023						0.900199	1.4175	0.629545
		1.12536	1.10013	0.546307						0.901122	1.41912	0.629872
		1.12563	1.10024	0.546591						0.90131	1.41991	0.6302
		1.12564	1.10025	0.546875						0.902498	1.42002	0.630527
		1.12667	1.10219	0.547159						0.90289	1.42011	0.630855
		1.12719	1.10259	0.547443						0.902972	1.42064	0.631182
		1.13247	1.10432	0.547727						0.904372	1.42206	0.63151
		1.13484	1.10455	0.548011						0.904429	1.42382	0.631838
		1.13502	1.1055	0.548295						0.904494	1.42448	0.632165
		1.13568	1.10606	0.54858						0.905206	1.42729	0.632493
		1.13586	1.10622	0.548864						0.905324	1.43007	0.63282
		1.13716	1.10662	0.549148						0.905842	1.43104	0.633148
		1.13757	1.10683	0.549432						0.90715	1.43218	0.633475
		1.13771	1.10692	0.549716						0.908397	1.4323	0.633803
		1.13805	1.10732	0.55						0.908894	1.43507	0.63413
		1.13818	1.10749	0.550284						0.909711	1.43753	0.634458
		1.13911	1.1075	0.550568						0.910219	1.43823	0.634785
		1.13945	1.10775	0.550852						0.910291	1.43977	0.635113
		1.14031	1.11029	0.551136						0.911598	1.44028	0.635441
		1.14096	1.1109	0.55142						0.91218	1.44047	0.635768
		1.14133	1.11189	0.551705						0.91484	1.44171	0.636096
		1.14189	1.11289	0.551989						0.915006	1.44554	0.636423
		1.14378	1.11356	0.552273						0.916686	1.44732	0.636751
		1.14401	1.11364	0.552557						0.917111	1.44962	0.637078
		1.14692	1.11376	0.552841						0.917767	1.45019	0.637406
		1.14739	1.11423	0.553125						0.918151	1.45146	0.637733
		1.14821	1.11549	0.553409						0.918998	1.45258	0.638061
		1.14937	1.11596	0.553693						0.919105	1.45341	0.638388
		1.15043	1.11687	0.553977						0.919993	1.45614	0.638716
		1.153	1.11751	0.554261						0.920308	1.4563	0.639044
		1.15308	1.11775	0.554545						0.920489	1.45673	0.639371
		1.15407	1.11794	0.55483						0.920903	1.45697	0.639699
		1.1545	1.11855	0.555114						0.921659	1.45717	0.640026
		1.15606	1.11893	0.555398						0.921948	1.46169	0.640354
		1.1568	1.1198	0.555682						0.922094	1.46196	0.640681
		1.15694	1.12181	0.555966						0.923196	1.46275	0.641009
		1.15699	1.12332	0.55625						0.9234	1.46547	0.641336
		1.1571	1.12406	0.556534						0.923402	1.46823	0.641664
		1.15849	1.1243	0.556818						0.924913	1.46828	0.641991
		1.16289	1.12506	0.557102						0.925173	1.47164	0.642319
		1.16343	1.12557	0.557386						0.925684	1.47487	0.642647
		1.16448	1.12557	0.55767						0.927309	1.47571	0.642974
		1.16643	1.1256	0.557955						0.928149	1.47734	0.643302
		1.1683	1.12626	0.558239						0.928573	1.47772	0.643629
		1.16942	1.12672	0.558523						0.928604	1.47804	0.643957
		1.17171	1.12703	0.558807						0.930573	1.47897	0.644284
		1.17253	1.1282	0.559091						0.931184	1.4795	0.644612
		1.17265	1.12882	0.559375						0.931567	1.47989	0.644939
		1.17383	1.12972	0.559659						0.932669	1.48017	0.645267
		1.17413	1.13064	0.559943						0.933723	1.4804	0.645594
		1.17574	1.13086	0.560227						0.93475	1.48218	0.645922
		1.17577	1.13173	0.560511						0.936973	1.48303	0.64625
		1.17662	1.1325	0.560795						0.937049	1.48343	0.646577
		1.17668	1.13257	0.56108						0.937484	1.4863	0.646905
		1.17683	1.13259	0.561364						0.938199	1.49248	0.647232
		1.17857	1.13284	0.561648						0.938272	1.49374	0.64756
		1.17993	1.13325	0.561932						0.938635	1.49429	0.647887
		1.18074	1.13329	0.562216						0.938839	1.49574	0.648215
		1.18169	1.13441	0.5625						0.939565	1.49672	0.648542
		1.18382	1.13477	0.562784						0.940506	1.49899	0.64887
		1.18399	1.13521	0.563068						0.940584	1.49983	0.649198
		1.18407	1.1368	0.563352						0.941338	1.50502	0.649525
		1.18573	1.13685	0.563636						0.943513	1.50526	0.649853
		1.18624	1.13686	0.56392						0.943743	1.50528	0.65018
		1.1869	1.13696	0.564205						0.944197	1.50547	0.650508
		1.18751	1.13718	0.564489						0.944271	1.50613	0.650835
		1.18778	1.13749	0.564773						0.944681	1.50647	0.651163
		1.18802	1.1377	0.565057						0.946081	1.50691	0.65149
		1.18907	1.13806	0.565341						0.947874	1.50708	0.651818
		1.18927	1.13862	0.565625						0.948569	1.50775	0.652145
		1.19111	1.14064	0.565909						0.948648	1.50895	0.652473
		1.19177	1.14172	0.566193						0.948944	1.51015	0.652801
		1.19217	1.14212	0.566477						0.950044	1.51107	0.653128
		1.19359	1.14217	0.566761						0.951107	1.51112	0.653456
[truncated: 1,525 more rows]
