# Supplementary material for: Endocytic trafficking determines cellular tolerance of presynaptic opioid signaling
Source: eLife. 2022 Nov 15;11:e81298. doi: 10.7554/eLife.81298 (PMC9708073; doi:10.7554/eLife.81298)
Supplement: Figure 2—source data 1. [file elife-81298-fig2-data1.xlsx]

## Sheet: Panels D F H
Panel F		A stands for "acute"							Panel D	TPD =	MOR S/T to A				Panel H
		D for "chronic"
				STANT acute	Stant chronic
	Ratio	DAMGO/Baseline		STA	STD				Ratio		TPDA	TPDD			Ratio	MOR DMSO	MOR101
		average		0.197721	0.297267				average		0.228117	0.281533			average	0.538793	0.368144
				0.212069	0.269123						0.20095	0.175427				0.560522	0.309111
				0.291123	0.397116						0.288732	0.262987				0.708352	0.680245
				0.162195	0.177861						0.252206	0.28984				0.270047	0.399829
				0.167393	0.283384						0.207637	0.23502				0.428509	0.438028
				0.0785913	0.233551						0.131822	0.365521				0.692189	0.173131
				0.26814	0.148463						0.440444	0.40817				0.496681	0.588979
				0.0375574	0.157602						0.0750275	0.462664				0.373133	0.420292
				0.198846	0.497546							0.234963				0.618876	0.449405
				0.170468	0.149093							0.222764				0.698064	0.269862
				0.275371	0.205948							0.237544				0.513797	0.31968
				0.313176	0.39806							0.201966				0.375732	0.276246
					0.455577											0.506159	0.102391
					0.362503											0.611747	0.393574
					0.425917											0.538203	0.322962
																0.603262	0.378425
																0.540102
																0.624102
	%inhibition				STA/STD Ttest				%inhibition		TPDA/TPDD ttest				%inhibition
					0.0331581						0.295312								MORDMSO/MOR101 Ttestr
																			0.00115956
					STA	STD					TPDA	TPDD				MOR DMSO	MOR101
					78.7931	73.0877					79.905	82.4573				43.9478	69.0889
					70.8877	60.2884					71.1268	73.7013				29.1648	31.9755
					83.7805	82.2139					74.7794	71.016				72.9953	60.0171
					83.2607	71.6616					79.2363	76.498				57.1491	56.1972
					92.1409	76.6449					86.8178	63.4479				30.7811	82.6869
					73.186	85.1537					55.9556	59.183				50.3319	41.1021
					96.2443	84.2398					92.4972	53.7336				62.6867	57.9708
					80.1154	50.2454						76.5037				38.1124	55.0595
					82.9532	85.0907						77.7236				30.1936	73.0138
					72.4629	79.4052						76.2456				48.6203	68.032
					68.6824	60.194						79.8034				62.4268	72.3754
						54.4423										49.3841	89.7609
						63.7497										38.8253	60.6426
						57.4083										46.1797	67.7038
																39.6738	62.1575
																45.9898
																37.5898
INSETS	frame #
MOR S/T to A acute	-58	-57	-56	-55	-54	-53	-52	-51	-50	-49	-48	-47	-46	-45	-44	-43	-42	-41	-40	-39	-38	-37	-36	-35	-34	-33	-32	-31	-30	-29	-28	-27	-26	-25	-24	-23	-22	-21	-20	-19	-18	-17	-16	-15	-14	-13	-12	-11	-10
baseline	0.0270305	0.0280094	0.0366079	0.0265717	0.029087	0.0305042	0.0280518	0.0255597	0.0270339	0.0245802	0.0237323	0.0295281	0.0276527	0.0271483	0.0272474	0.0162888	0.0189398	0.0222388	0.0156465	0.0152522	0.024137	0.0206587	0.0200821	0.00945869	0.0182064	0.0157412	0.0165009	0.0085136	0.0155812	0.00768483	0.012045	0.00934173	0.0116219	0.0166996	0.016357	0.013132	0.010257	0.0120395	0.00886451	0.00515699	0.00855752	0.0114652	0.00524455	0.00601782	-0.00159437	0.00913178	0.00556401	0.00763671	-0.00167519
baseline SEM	0.0031069	0.0031174	0.00317744	0.00304462	0.00316227	0.00307035	0.00326335	0.00284552	0.00271387	0.00278995	0.00289662	0.00288776	0.00273428	0.00268298	0.00275754	0.00269203	0.00267717	0.00281497	0.00288015	0.00262405	0.00266668	0.00256542	0.0026654	0.00261162	0.00255651	0.00251606	0.00245801	0.0025061	0.00265935	0.00240533	0.0022382	0.00224385	0.00223225	0.0022447	0.0023329	0.00196022	0.00201499	0.00216609	0.00220632	0.00209959	0.00196566	0.00186533	0.00173706	0.00188078	0.00178877	0.00166088	0.00181674	0.00166868	0.00170048
DAMGO	0.082007	0.0617278	0.0424347	0.035135	0.0250342	0.0251793	0.0238688	0.0142405	0.0139831	0.0198938	0.0194589	0.0181522	0.016565	0.0191227	0.0170393	0.0150922	0.0200353	0.0129201	0.0176912	0.0202993	0.0216709	0.0152717	0.00876994	0.0131842	0.0150607	0.00804634	0.00965308	0.0117517	0.00986354	0.010017	0.0148458	0.00705651	0.00782139	0.00543665	0.00422251	0.004528	0.00218309	0.00668696	-0.000915931	0.000133118	0.00863525	0.00608409	0.00660556	0.00571249	0.00423695	0.00174334	0.000521678	0.00385707	0.000630916
DAMGO SEM	0.00322613	0.00308939	0.00260707	0.00273866	0.00262951	0.00263242	0.00235833	0.00249335	0.00229647	0.00239007	0.0023746	0.00233828	0.002491	0.00260368	0.00247697	0.00231501	0.00244168	0.00259428	0.00250199	0.00240622	0.00246743	0.00239067	0.00252688	0.00214433	0.00233782	0.00224297	0.00222096	0.0023711	0.0022466	0.00237017	0.00221466	0.00212042	0.00218822	0.00183526	0.00189788	0.00186476	0.00185666	0.00181077	0.001948	0.00181377	0.00170913	0.00182589	0.00172973	0.0017415	0.0017095	0.00164142	0.00161709	0.0016109	0.00154212
MOR S/T to A chronic	-58	-57	-56	-55	-54	-53	-52	-51	-50	-49	-48	-47	-46	-45	-44	-43	-42	-41	-40	-39	-38	-37	-36	-35	-34	-33	-32	-31	-30	-29	-28	-27	-26	-25	-24	-23	-22	-21	-20	-19	-18	-17	-16	-15	-14	-13	-12	-11	-10
baseline	0.0226763	0.0228943	0.0230464	0.0183492	0.0187068	0.0212576	0.0110454	0.021837	0.0219061	0.0175714	0.0149968	0.0129303	0.0134155	0.0167399	0.0155587	0.0217233	0.0142087	0.0127729	0.00852074	0.00884408	0.00855326	0.0104617	0.0100481	0.0115598	0.00798727	0.00873883	0.00472995	0.00655003	0.0078412	0.00272285	0.00713557	0.00407294	0.00952888	0.000678501	0.00233556	0.00675568	0.00536438	0.00784631	-0.000733881	0.00371863	0.00531982	0.00340182	0.00508639	0.00615152	0.000341869	0.00585696	0.00327805	0.00652555	0.00471917
baseline SEM	0.00166336	0.00158124	0.00159153	0.00154627	0.00154938	0.00151682	0.00148785	0.00144905	0.00149192	0.00149028	0.00147458	0.00140716	0.00136225	0.00142806	0.0013554	0.0014244	0.00142182	0.00139168	0.00139008	0.00135665	0.0013282	0.00132354	0.00131267	0.00125296	0.00124391	0.00125266	0.00121512	0.00123012	0.00117855	0.00114563	0.00110333	0.00110154	0.00129383	0.00110079	0.00112744	0.0010409	0.00100619	0.000964305	0.000979565	0.000979488	0.000958158	0.000895554	0.000844483	0.000871784	0.000815759	0.000816806	0.000781958	0.000772536	0.000758974
DAMGO	0.0671468	0.0498576	0.0398911	0.0285054	0.0232636	0.02147	0.0182401	0.0146932	0.0177008	0.0141386	0.00857156	0.0170013	0.0130056	0.0115909	0.0120199	0.0104735	0.00850181	0.0100413	0.0100957	0.00742942	0.0105115	0.010967	0.00776306	0.00887863	0.00867738	0.00695364	0.00987022	0.00712283	0.00697781	0.00338312	0.0069702	0.00487493	0.00703653	0.00600758	0.00615106	0.00789715	0.00357406	-0.000867689	0.00418335	-0.00123234	0.00530127	0.00789431	0.00420665	0.00236518	0.00282667	0.00262602	0.00818341	-0.000432469	0.000967918
DAMGO SEM	0.001285	0.00120159	0.0011855	0.00120011	0.00116964	0.00111503	0.00114515	0.00108245	0.00112026	0.00108119	0.00108227	0.0011177	0.00108152	0.00108191	0.0010382	0.00105216	0.00104862	0.00103081	0.00103009	0.00104117	0.00101333	0.000992621	0.000964107	0.000977116	0.000993469	0.000937911	0.000948813	0.000949064	0.000917899	0.000918244	0.000896186	0.000859611	0.000881013	0.000858288	0.000857339	0.000841044	0.000821085	0.000810604	0.000792673	0.000827642	0.000774235	0.000800819	0.000781346	0.000767088	0.000759303	0.000738807	0.000708876	0.00071017	0.000712685
STANT acute	-58	-57	-56	-55	-54	-53	-52	-51	-50	-49	-48	-47	-46	-45	-44	-43	-42	-41	-40	-39	-38	-37	-36	-35	-34	-33	-32	-31	-30	-29	-28	-27	-26	-25	-24	-23	-22	-21	-20	-19	-18	-17	-16	-15	-14	-13	-12	-11	-10
baseline	0.0173773	0.0172367	0.0183383	0.012446	0.00766152	0.0145808	0.0125298	0.0124763	0.0149107	0.0141062	0.00990131	0.00618114	0.0103105	0.00798894	0.0112962	0.0130621	0.0110629	0.0135126	0.00926713	0.00877809	0.0071155	0.0133781	0.00951583	0.0108565	0.00758185	0.00954606	0.00620501	0.00454542	0.00601391	0.00337435	0.00173505	0.00141327	0.00383131	0.00858684	0.00446755	0.00482246	0.00161075	0.000455413	0.00302419	0.000321031	-0.0019502	0.00430994	0.00586024	0.00628637	-0.00217752	0.00640879	-0.00589896	0.00203444	0.00211511
baseline SEM	0.00233272	0.00227623	0.00227931	0.00218375	0.0022695	0.00216467	0.0020717	0.00210814	0.00204475	0.00200303	0.00198296	0.00194213	0.00190237	0.00192613	0.00186076	0.00189576	0.00183382	0.00185805	0.00180952	0.00177424	0.001832	0.00183415	0.00174109	0.00169165	0.00165242	0.00159597	0.00160268	0.00155366	0.0015451	0.00153254	0.00151451	0.00152786	0.00148599	0.00146706	0.00141797	0.00146652	0.00133951	0.00131486	0.00126003	0.00126966	0.00115524	0.00113051	0.00117323	0.00106807	0.00105838	0.00103913	0.00104704	0.00102384	0.000974927
DAMGO	0.0791215	0.0505131	0.0369744	0.0114604	0.0217501	0.019671	0.01605	0.0195642	0.0107992	0.0140314	0.0108755	0.00915262	0.00969473	0.010127	0.0125192	0.0133912	0.00239451	0.0083512	0.00793928	0.00791101	0.00939038	0.0107584	0.0129178	0.00715755	0.00418301	0.00738577	0.00433323	0.00372216	0.003959	0.00805719	0.00399501	0.000990457	0.00259887	0.00438657	0.00439354	0.00504204	0.00159418	0.00644132	-0.00304471	0.00386921	0.00399921	0.000768158	0.00248517	-0.00209684	-0.00142219	0.000276218	0.00101958	-0.00283126	-0.00293363
DAMGO SEM	0.00276197	0.00287032	0.00292421	0.00300005	0.00275615	0.0029103	0.00273959	0.00270587	0.00252502	0.00246864	0.00250503	0.00236927	0.00244609	0.00232907	0.00226475	0.0022138	0.00214631	0.00225273	0.0020757	0.00206441	0.00199899	0.00198048	0.00185107	0.00183143	0.00183145	0.00193214	0.00174356	0.00158547	0.00161407	0.00159139	0.00152672	0.00151636	0.00147096	0.00139536	0.00134212	0.00133416	0.00135274	0.00126204	0.00126782	0.00117924	0.00122534	0.00116741	0.00113207	0.00120014	0.00120711	0.0011296	0.00101935	0.00108016	0.00100516
STANT chronic	-58	-57	-56	-55	-54	-53	-52	-51	-50	-49	-48	-47	-46	-45	-44	-43	-42	-41	-40	-39	-38	-37	-36	-35	-34	-33	-32	-31	-30	-29	-28	-27	-26	-25	-24	-23	-22	-21	-20	-19	-18	-17	-16	-15	-14	-13	-12	-11	-10
baseline	0.0236771	0.0227879	0.0237891	0.0290226	0.0221527	0.0221659	0.0236808	0.0230399	0.0202796	0.0215419	0.0203508	0.0167025	0.0202082	0.0173456	0.0167968	0.0145734	-0.00914356	0.0124789	0.0129691	0.0164363	0.0105711	0.0123633	0.0131245	0.0118337	0.00610126	0.00928234	0.00789284	0.00906073	0.00635833	0.00929745	0.00888345	0.00736263	0.00585759	0.00798571	0.0122889	0.0095152	0.0063082	0.0032045	0.00704434	0.0082402	0.0111339	0.00341272	0.00279658	-0.00122108	-0.00263562	0.00240617	0.00474731	0.00439546	-0.0020149
baseline SEM	0.00161076	0.00160474	0.00157856	0.00161628	0.00153365	0.0015387	0.00156547	0.00149537	0.00146115	0.001487	0.00146899	0.00145017	0.00145341	0.0014104	0.00140955	0.0014125	0.00176979	0.00136486	0.00131869	0.00134339	0.00134564	0.00127962	0.00129952	0.00127016	0.00126494	0.00125248	0.00122254	0.00123166	0.00120455	0.00112704	0.00115	0.00112276	0.00113114	0.00109012	0.00110273	0.00106243	0.00106926	0.00105943	0.0011055	0.00100465	0.000983544	0.000965061	0.000887793	0.000890601	0.000875973	0.00081478	0.000809226	0.000748108	0.000727768
DAMGO	0.0610904	0.0404431	0.0289352	0.0243124	0.0243001	0.0121825	0.0073018	0.0123097	0.0130443	0.00638067	0.012465	0.00900054	0.00767243	0.00827127	0.00583091	0.0104889	0.00691673	0.00762031	0.00420464	0.0037235	0.00448744	0.00489864	0.00184127	0.00530146	0.00253673	0.00346667	0.00223806	0.00219673	0.00265069	0.00105339	-0.0023996	0.00619319	0.0038293	0.00672047	-0.00164308	-0.00486349	0.00119835	0.000328922	0.00360198	0.00691254	-0.00181662	0.000465677	0.00083223	0.000281779	0.00415216	0.00183087	-0.000608625	0.00242514	0.00203315
DAMGO SEM	0.0014998	0.00145111	0.00133785	0.00132798	0.00133016	0.00127993	0.00129079	0.00125508	0.00125948	0.00122333	0.00126794	0.00120785	0.00118043	0.00119397	0.00117447	0.00118485	0.00120168	0.00114798	0.00113811	0.00113469	0.00110491	0.00110267	0.00108829	0.0010795	0.00105511	0.0010393	0.00102869	0.00103381	0.00103387	0.0010158	0.0009825	0.000979481	0.000948228	0.000917056	0.000918643	0.000947125	0.000940514	0.000888951	0.000870143	0.000919783	0.000900951	0.00085	0.000868286	0.000818666	0.000795055	0.000756181	0.000751631	0.000711675	0.000706701
DMSO	-58	-57	-56	-55	-54	-53	-52	-51	-50	-49	-48	-47	-46	-45	-44	-43	-42	-41	-40	-39	-38	-37	-36	-35	-34	-33	-32	-31	-30	-29	-28	-27	-26	-25	-24	-23	-22	-21	-20	-19	-18	-17	-16	-15	-14	-13	-12	-11	-10
baseline	0.0143918	0.0176831	0.0095883	0.0110979	0.00794882	0.00140796	0.00602848	0.0040614	-0.00248148	0.00654029	0.000939915	0.00338299	0.00234347	-4.69632e-05	0.00245835	-0.000634698	0.00213978	0.00562892	0.00330954	0.00561133	0.00163303	-2.49887e-05	-0.00136097	0.000138791	0.000411472	-0.000475762	-0.00390365	-0.0038519	-0.00131693	-0.00395886	-0.00503299	-0.00301179	-4.62708e-05	-0.0027474	-0.00386198	-0.00260924	-0.00471381	-0.0023912	-0.0107377	-0.00367963	-0.000997721	-0.00141243	-0.00248739	-0.00489074	-0.00216402	-0.00386809	-0.000880628	-0.00342216	0.000790697
baseline SEM	0.00258216	0.00253727	0.00251764	0.00252518	0.0024648	0.00230053	0.00224875	0.00219773	0.00214862	0.00216858	0.00211349	0.00207822	0.00201133	0.00199251	0.0019831	0.00193571	0.00192668	0.00187015	0.00185709	0.0018485	0.00182877	0.00178921	0.00175337	0.00176583	0.00174872	0.00168462	0.00166244	0.00163136	0.00156151	0.00156569	0.00153117	0.00152833	0.00147509	0.00141799	0.00144327	0.00134977	0.0013649	0.00131814	0.00127903	0.00125126	0.00127913	0.00117746	0.00116796	0.00112298	0.00104743	0.00102358	0.00100396	0.000982956	0.000921957
DAMGO	0.0773872	0.0532765	0.039187	0.0315062	0.0224556	0.0189898	0.0125472	0.0141001	0.0156512	0.0133142	0.0144188	0.0129485	0.0134591	0.0120467	0.00632305	0.00756379	0.0102385	0.0135164	0.0125294	0.00957294	0.014574	0.00893656	0.00707814	0.00625299	0.0104834	0.0106375	0.00654528	0.00642335	0.0105347	0.00815462	0.00768836	0.00738431	0.00502429	0.00670057	0.00436834	0.00561783	0.00442161	0.00789296	0.00460025	0.00860487	0.00682411	0.00426259	0.00161299	-8.01825e-05	0.00186495	0.00277015	-0.000572693	0.00196523	0.0016175
DAMGO SEM	0.00233894	0.0022503	0.00220161	0.00217691	0.0020962	0.00208155	0.00207706	0.0020314	0.00200172	0.00198549	0.00193662	0.00193419	0.00195216	0.00190274	0.00187651	0.00183763	0.0018759	0.00182987	0.00182608	0.00180265	0.00180796	0.00173436	0.00171709	0.00164969	0.00165972	0.00162281	0.00159174	0.00156237	0.00158224	0.00151033	0.00152396	0.00143172	0.00140162	0.0014042	0.0013516	0.00135335	0.00132838	0.00125834	0.00125879	0.00122271	0.00122224	0.00114535	0.00108971	0.00106186	0.001062	0.00103375	0.000999386	0.000943608	0.00091966
Cmpd101	-58	-57	-56	-55	-54	-53	-52	-51	-50	-49	-48	-47	-46	-45	-44	-43	-42	-41	-40	-39	-38	-37	-36	-35	-34	-33	-32	-31	-30	-29	-28	-27	-26	-25	-24	-23	-22	-21	-20	-19	-18	-17	-16	-15	-14	-13	-12	-11	-10
baseline	0.00948193	0.00645278	0.00898088	0.00971939	0.00682905	0.00814492	0.00466926	-0.00120491	-0.00040449	0.00376017	-0.000341067	0.00647949	0.00888744	0.010248	0.0078906	0.00533314	0.00539159	0.00469258	0.00424821	-0.00108677	0.00426724	0.00325084	0.000971284	0.00103102	0.00461515	0.000376806	-0.00480288	0.0017137	-0.00129989	-0.00403229	-0.00352357	0.00567892	0.000265515	-0.0015827	0.00449164	0.00374728	0.00344797	0.00317831	0.00204974	0.00228227	0.00473189	0.00227166	-0.00289055	0.00378088	0.00469429	-2.31944e-05	0.0005558	0.00327942	-0.00171553
baseline SEM	0.00293405	0.00284733	0.00282817	0.00279841	0.00265918	0.00269211	0.00262917	0.00251159	0.00250263	0.00252847	0.00248431	0.00254936	0.00243038	0.00240327	0.00234396	0.00229347	0.00233886	0.002179	0.00216965	0.0020671	0.00210092	0.00208457	0.00204277	0.0020136	0.00196101	0.00191139	0.00195182	0.00182508	0.00172598	0.00169229	0.00168014	0.00164805	0.00163459	0.00158548	0.00153131	0.00150844	0.00150115	0.00144725	0.00137448	0.00135093	0.00135536	0.00126314	0.00123854	0.00119437	0.00108869	0.00104095	0.00104589	0.00102184	0.000920422
DAMGO	0.0715344	0.0527348	0.0385714	0.0187731	0.0230784	0.0191833	0.0162823	0.0146449	0.0139598	0.0114098	0.0138199	0.0123114	0.00940179	0.0140288	0.00974434	0.00930096	0.00667661	0.011047	0.0136028	0.0110444	0.00690925	0.0072108	0.0117646	0.01063	0.00868392	0.0032232	0.00216588	0.00434017	0.00622856	0.0057538	0.00602648	0.00376985	-0.00120604	-0.000425378	0.00502592	0.00372258	0.00320643	0.005271	0.000851001	0.00754987	-0.00271402	0.00168913	0.00129758	-0.002469	0.00294982	-0.00268567	0.000407159	0.00202943	-0.000120251
DAMGO SEM	0.00346364	0.00361688	0.00344	0.00327842	0.00301529	0.00322621	0.0028281	0.0029142	0.00283748	0.00272122	0.00262344	0.00243873	0.00224895	0.0021851	0.00222372	0.0020441	0.00204898	0.00226519	0.00206596	0.00209013	0.00210493	0.0018632	0.00202519	0.00175801	0.00198975	0.001816	0.00171778	0.00166042	0.00169059	0.0015486	0.00155377	0.00164086	0.00158018	0.00152057	0.00146937	0.00156481	0.00161389	0.00161341	0.00158037	0.00194214	0.001489	0.00172374	0.00127269	0.00130656	0.00126466	0.00104495	0.00104855	0.000992205	0.000983403
[truncated: 71 more columns]

## Sheet: Panels B G
Panel B	MOR DAMGO									MOR Vehicle									MOR101		Panel G							MORDMSO
	Cell ID	baseline	fr6-fr11	fr12-fr16	fr17-fr21	fr22-fr26	fr27-fr31	fr32-fr36		Cell ID	baseline	fr6-fr11	fr12-fr16	fr17-fr21	fr22-fr26	fr27-fr31	fr32-fr36		Cell ID	baseline	fr6-fr11	fr12-fr16	fr17-fr21	fr22-fr26	fr27-fr31	fr32-fr36		Cell ID	baseline	fr6-fr11	fr12-fr16	fr17-fr21	fr22-fr26	fr27-fr31	fr32-fr36
	2234	1	1.15084	1.5306	1.84889	2.15547	2.24035	2.30829		2839	1	0.941861	0.954246	0.930028	0.942332	0.924346	0.915202		3125	1	0.927033	0.948063	0.813297	0.84219	0.954949	0.859381		3123	1	1.05409	1.07784	1.03524	1.09527	1.17331	1.21996
	2235	1	1.04833	1.15861	1.19122	1.19457	1.29304	1.4083		2840	1	0.910746	0.955888	1.01649	1.01565	1.00727	0.996886		3126	1	1.04366	1.04904	1.04209	1.06421	1.03002	1.05667		3124	1	1.0937	1.26289	1.36385	1.28175	1.30649	1.56761
	2236	1	1.06733	1.1577	1.28793	1.22405	1.56163	1.49779		2914	1	0.959689	1.0407	1.21529	1.14593	0.973259	1.09791		3271	1	1.00604	0.949036	1.00095	1.03174	1.08656	0.971162		3272	1	1.0575	1.12958	1.27754	1.50208	1.53455	1.38006
	2237	1	1.18694	1.38596	1.72294	1.94403	2.17062	2.05334		2915	1	1.01588	1.02604	1.04858	1.01753	0.975431	0.995795		3273	1	0.975594	0.979643	1.14852	1.11897	1.10338	1.11477		3274	1	1.12923	1.25839	1.50809	1.62604	1.69522	1.50613
	2241	1	1.07508	1.07971	1.2695	1.34097	1.32823	1.42945		3831	1	1.06588	1.05403	1.02892	0.959615	1.05658	1.09294		3275	1	0.920441	0.897955	0.822044	0.828586	0.81515	0.785971		3310	1	0.962058	1.02392	1.19427	1.28813	1.301	1.42521
	2242	1	0.977439	1.2213	1.34408	1.40413	1.45745	1.65762											3309	1	1.02673	0.984018	1.06209	1.12199	1.0266	1.15606		3312	1	0.978676	1.04463	1.01666	1.09737	1.08629	1.14273
	2782	1	1.29581	1.5311	1.66968	2.15079	2.75144	3.33233		bins	baseline	fr6-fr11	fr12-fr16	fr17-fr21	fr22-fr26	fr27-fr31	fr32-fr36		3311	1	1.01739	0.950341	1.01409	0.975437	1.03525	0.972049
	3453	1	1.07284	1.09952	1.20223	1.46312	1.61833	1.59309		Average	1	0.978812	1.00618	1.04786	1.01621	0.987377	1.01975		3313	1	1.05788	1.07951	1.00369	1.00224	1.04139	1.07189		bins	baseline	fr6-fr11	fr12-fr16	fr17-fr21	fr22-fr26	fr27-fr31	fr32-fr36
										SEM	2.3499e-16	0.0247543	0.019081	0.0415985	0.0319318	0.0194936	0.0306548											Average	1	1.04588	1.13288	1.23261	1.31511	1.34948	1.37361
	bins	baseline	fr6-fr11	fr12-fr16	fr17-fr21	fr22-fr26	fr27-fr31	fr32-fr36											bins	baseline	fr6-fr11	fr12-fr16	fr17-fr21	fr22-fr26	fr27-fr31	fr32-fr36		SEM	1.78443e-16	0.0241402	0.0392127	0.0711399	0.079794	0.0847038	0.0611947
	Average	1	1.10933	1.27056	1.44206	1.60964	1.80264	1.91002		Ttest	Veh/DAMGO	0.0233237	0.0106934	0.00890253	0.00889316	0.00580777	0.0127583		Average	1	0.996844	0.979702	0.988346	0.998171	1.01166	0.998495
	SEM	1.27192e-16	0.0325739	0.0615169	0.0865833	0.134596	0.173349	0.217186				*	*	**	**	**	*		SEM	8.99383e-17	0.0169922	0.0194756	0.038189	0.0372985	0.0300668	0.042035				ns	**	*	**	**	***
																												Ttest	DMSO/101	0.139342	0.00453191	0.0113833	0.00362215	0.00229465	0.000410168

## Sheet: Panels C E
Panel C		MOR S/T to A DAMGO									MOR S/T to A vehicle									STANT DAMGO			Panel E						STANT Vehicle
		Cell ID	baseline	fr6-fr11	fr12-fr16	fr17-fr21	fr22-fr26	fr27-fr31	fr32-fr36		Cell ID	baseline	fr6-fr11	fr12-fr16	fr17-fr21	fr22-fr26	fr27-fr31	fr32-fr36		Cell ID	baseline	fr6-fr11	fr12-fr16	fr17-fr21	fr22-fr26	fr27-fr31	fr32-fr36		Cell ID	baseline	fr6-fr11	fr12-fr16	fr17-fr21	fr22-fr26	fr27-fr31	fr32-fr36
		2780	1	1.01263	1.1491	1.18196	1.30843	1.38937	1.27418		2838	1	0.914315	0.890157	0.971644	0.972614	0.956429	0.940062		2845	1	0.941376	0.986782	0.974686	1.06056	1.12984	1.07897		2847	1	0.948099	1.03761	1.10924	1.08272	0.903568	1.12159
		2781	1	0.886223	0.954304	0.965041	0.952505	0.976707	1.07684		2908	1	1.06337	1.21794	1.37527	1.00032	1.06516	1.03497		2846	1	1.12587	1.15717	1.18264	1.23209	1.17279	1.28188		2902	1	0.890502	1.00128	0.854954	0.968497	1.08689	1.02295
		2836	1	1.03534	0.911102	1.04864	1.05506	1.20624	1.24886		2910	1	0.898619	0.798427	0.940092	0.853825	0.861535	0.967269		2901	1	1.02179	1.17602	1.31728	1.32623	1.33606	1.491		2922	1	1.1533	1.14792	1.0609	0.984361	1.08884	1.13518
		2837	1	1.03008	1.04673	1.10603	1.10576	1.09793	1.0339		2924	1	0.926578	1.11108	1.29936	1.24075	1.2081	1.4078		2921	1	0.929782	0.955331	0.910382	1.01718	1.0285	1.05732		3804	1	1.03478	0.919878	0.924484	0.997938	0.977207	1.01926
		2909	1	0.967448	1.02982	0.986193	1.12451	1.19263	1.16501		3829	1	1.08784	1.09903	1.16677	1.15731	1.12221	1.10006		2923	1	1.00517	1.02356	0.913703	0.970457	1.04923	1.02817		3805	1	1.04725	0.962498	1.03962	1.00401	1.07552	1.04755
		2930	1	1.02788	1.03235	1.00291	1.0363	1.0432	1.17356											3806	1	0.998529	1.07817	1.3778	1.29721	1.54531	1.40603
		3830	1	1.04581	1.06971	1.07839	1.22774	1.27666	1.29345		bins	baseline	fr6-fr11	fr12-fr16	fr17-fr21	fr22-fr26	fr27-fr31	fr32-fr36											bins	baseline	fr6-fr11	fr12-fr16	fr17-fr21	fr22-fr26	fr27-fr31	fr32-fr36
											Average	1	0.978145	1.02333	1.15063	1.04496	1.04269	1.09003		bins	baseline	fr6-fr11	fr12-fr16	fr17-fr21	fr22-fr26	fr27-fr31	fr32-fr36		Average	1	1.01479	1.01384	0.997842	1.00751	1.0264	1.0693
		bins	baseline	fr6-fr11	fr12-fr16	fr17-fr21	fr22-fr26	fr27-fr31	fr32-fr36		SEM	4.44089e-17	0.0359744	0.0691723	0.077255	0.0615511	0.0545695	0.0752774		Average	1	1.00375	1.06284	1.11275	1.15062	1.21029	1.2239		SEM	1.47288e-16	0.0402661	0.0347358	0.0419196	0.0176844	0.0331526	0.0220911
		Average	1	1.00077	1.02759	1.05274	1.11576	1.16896	1.18083											SEM	1.14065e-16	0.026156	0.0336771	0.0775673	0.0570916	0.0735826	0.0735864
		SEM	1.6252e-16	0.0197898	0.027057	0.0266558	0.0420122	0.0494775	0.0346204		Ttest	Veh/DAMGO	0.602144	0.954619	0.245989	0.390205	0.152959	0.299026											ttest	Veh/DAMGO	0.835187	0.385959	0.29361	0.0760384	0.0854228	0.126699

## Sheet: Panel I
		DMSO					DMSO + DAMGO				DAMGO + Cmpd101
		Av	1.32596	1.2608			0.768962	1.2165			1.23164	1.26897
		Median	1	1			0.692217	1.05342			0.980041	1.07944
		count	2273				2209				2456
			SEP	mCh	Freq		SEP	mCh	Freq		SEP	mCh	Freq
			-0.36032	0.0765132	0.000439947		-0.887604	0.0934283	0.000452694		-0.887542	0.0713693	0.000407166
			-0.338865	0.102535	0.000879894		-0.685542	0.0958405	0.000905387		-0.668511	0.0797393	0.000814332
			-0.338391	0.110097	0.00131984		-0.615784	0.104819	0.00135808		-0.626985	0.0940501	0.0012215
			-0.33766	0.124189	0.00175979		-0.579697	0.106359	0.00181077		-0.623633	0.108865	0.00162866
			-0.311453	0.124482	0.00219974		-0.575707	0.106487	0.00226347		-0.528187	0.113239	0.00203583
			-0.302838	0.12457	0.00263968		-0.556316	0.110102	0.00271616		-0.480827	0.116314	0.002443
			-0.266226	0.128686	0.00307963		-0.501676	0.115163	0.00316885		-0.476515	0.117013	0.00285016
			-0.254833	0.130866	0.00351958		-0.442707	0.120795	0.00362155		-0.430053	0.125417	0.00325733
			-0.249867	0.134074	0.00395952		-0.43052	0.120876	0.00407424		-0.415734	0.125588	0.0036645
			-0.2394	0.152026	0.00439947		-0.411616	0.121139	0.00452694		-0.408638	0.127492	0.00407166
			-0.235451	0.159859	0.00483942		-0.400442	0.122309	0.00497963		-0.398821	0.131509	0.00447883
			-0.189955	0.162132	0.00527937		-0.383712	0.124369	0.00543232		-0.379531	0.132808	0.00488599
			-0.183464	0.16347	0.00571931		-0.376838	0.127325	0.00588502		-0.375978	0.134907	0.00529316
			-0.179271	0.168082	0.00615926		-0.367568	0.127692	0.00633771		-0.358799	0.135024	0.00570033
			-0.177588	0.169881	0.00659921		-0.325131	0.129814	0.0067904		-0.358189	0.140389	0.00610749
			-0.169046	0.171504	0.00703916		-0.309404	0.135663	0.0072431		-0.357231	0.141782	0.00651466
			-0.141716	0.171836	0.0074791		-0.304388	0.136542	0.00769579		-0.331794	0.141928	0.00692182
			-0.141046	0.172731	0.00791905		-0.270285	0.140005	0.00814848		-0.320879	0.14264	0.00732899
			-0.116948	0.174364	0.008359		-0.267727	0.143091	0.00860118		-0.312107	0.144892	0.00773616
			-0.116742	0.178904	0.00879894		-0.258868	0.143438	0.00905387		-0.311422	0.148293	0.00814332
			-0.115101	0.181193	0.00923889		-0.258438	0.157932	0.00950656		-0.310317	0.149827	0.00855049
			-0.115077	0.184853	0.00967884		-0.249193	0.158909	0.00995926		-0.301333	0.151283	0.00895765
			-0.102266	0.185412	0.0101188		-0.246398	0.162681	0.010412		-0.278565	0.15326	0.00936482
			-0.0905909	0.186405	0.0105587		-0.204622	0.164641	0.0108646		-0.268908	0.154979	0.00977199
			-0.0826641	0.187595	0.0109987		-0.20075	0.165219	0.0113173		-0.254339	0.155286	0.0101792
			-0.0722147	0.189197	0.0114386		-0.198373	0.165238	0.01177		-0.250268	0.161545	0.0105863
			-0.0718874	0.192249	0.0118786		-0.196896	0.1655	0.0122227		-0.248289	0.161644	0.0109935
			-0.0701642	0.19261	0.0123185		-0.182072	0.166284	0.0126754		-0.246888	0.16188	0.0114007
			-0.0685021	0.195385	0.0127585		-0.180801	0.166447	0.0131281		-0.245429	0.165698	0.0118078
			-0.0651224	0.195597	0.0131984		-0.175527	0.166449	0.0135808		-0.241662	0.166379	0.012215
			-0.059707	0.19569	0.0136384		-0.174645	0.169423	0.0140335		-0.225129	0.169512	0.0126221
			-0.0565198	0.201399	0.0140783		-0.17135	0.170409	0.0144862		-0.220006	0.173117	0.0130293
			-0.0494223	0.201973	0.0145183		-0.156059	0.170816	0.0149389		-0.218586	0.173159	0.0134365
			-0.0443757	0.204841	0.0149582		-0.150045	0.172071	0.0153916		-0.200761	0.17609	0.0138436
			-0.0388738	0.205204	0.0153982		-0.141053	0.174178	0.0158443		-0.197553	0.179203	0.0142508
			-0.0294538	0.206952	0.0158381		-0.139617	0.176213	0.016297		-0.19523	0.179364	0.014658
			-0.0274508	0.207269	0.016278		-0.13532	0.178065	0.0167497		-0.192727	0.183991	0.0150651
			-0.0213669	0.211335	0.016718		-0.122451	0.178624	0.0172024		-0.182098	0.185625	0.0154723
			-0.0212411	0.211964	0.0171579		-0.118352	0.178735	0.017655		-0.173792	0.186679	0.0158795
			-0.0206597	0.213528	0.0175979		-0.113494	0.180375	0.0181077		-0.158335	0.187078	0.0162866
			-0.0192943	0.213749	0.0180378		-0.11081	0.183154	0.0185604		-0.150541	0.187313	0.0166938
			-0.0181489	0.217086	0.0184778		-0.108306	0.184595	0.0190131		-0.140267	0.188754	0.017101
			-0.0158155	0.218806	0.0189177		-0.106527	0.185363	0.0194658		-0.128716	0.188911	0.0175081
			-0.0109244	0.218806	0.0193577		-0.105478	0.187217	0.0199185		-0.127245	0.190429	0.0179153
			-0.00920228	0.219463	0.0197976		-0.105041	0.189768	0.0203712		-0.123815	0.192817	0.0183225
			-0.00721571	0.22426	0.0202376		-0.0934834	0.193084	0.0208239		-0.102015	0.193438	0.0187296
			0.00167562	0.224387	0.0206775		-0.0934115	0.193091	0.0212766		-0.0966367	0.196375	0.0191368
			0.00732222	0.225153	0.0211175		-0.0908857	0.193172	0.0217293		-0.0925473	0.20058	0.019544
			0.00793662	0.225194	0.0215574		-0.0859846	0.194063	0.022182		-0.0913092	0.200606	0.0199511
			0.0112574	0.226021	0.0219974		-0.0777809	0.199821	0.0226347		-0.0861083	0.206935	0.0203583
			0.0130531	0.233128	0.0224373		-0.0771877	0.199968	0.0230874		-0.0796427	0.208559	0.0207655
			0.0155652	0.235523	0.0228773		-0.0745036	0.200734	0.0235401		-0.0744654	0.209457	0.0211726
			0.0164817	0.235739	0.0233172		-0.0730851	0.200843	0.0239928		-0.0716421	0.210263	0.0215798
			0.0165422	0.236978	0.0237571		-0.0728799	0.201676	0.0244455		-0.0677611	0.210876	0.021987
			0.0165999	0.237439	0.0241971		-0.0651309	0.206484	0.0248981		-0.0659477	0.21088	0.0223941
			0.0225917	0.239949	0.024637		-0.0606621	0.208275	0.0253508		-0.0603765	0.211823	0.0228013
			0.0248602	0.240168	0.025077		-0.0563557	0.209481	0.0258035		-0.0572886	0.212193	0.0232085
			0.0260997	0.240394	0.0255169		-0.0553618	0.209715	0.0262562		-0.0566811	0.215671	0.0236156
			0.0277472	0.240845	0.0259569		-0.0553314	0.209838	0.0267089		-0.0516278	0.216929	0.0240228
			0.0282119	0.243352	0.0263968		-0.0549589	0.20986	0.0271616		-0.0509413	0.21817	0.02443
			0.0307399	0.245469	0.0268368		-0.0534436	0.211123	0.0276143		-0.0502818	0.218648	0.0248371
			0.0318496	0.246168	0.0272767		-0.0526385	0.213068	0.028067		-0.0469322	0.21943	0.0252443
			0.0329631	0.247853	0.0277167		-0.0488582	0.213178	0.0285197		-0.0457774	0.220327	0.0256515
			0.0334636	0.247948	0.0281566		-0.0483401	0.213775	0.0289724		-0.0424344	0.221465	0.0260586
			0.0335683	0.249811	0.0285966		-0.0467369	0.213902	0.0294251		-0.0310906	0.222432	0.0264658
			0.0341743	0.250552	0.0290365		-0.0462459	0.216683	0.0298778		-0.0269072	0.226133	0.026873
			0.0348497	0.251278	0.0294765		-0.0459167	0.218467	0.0303305		-0.02133	0.226788	0.0272801
			0.0356019	0.253547	0.0299164		-0.0458629	0.218592	0.0307832		-0.0139905	0.226814	0.0276873
			0.0393757	0.254708	0.0303564		-0.0441874	0.219029	0.0312359		-0.0132323	0.22725	0.0280945
			0.0398141	0.254918	0.0307963		-0.0422046	0.219965	0.0316885		-0.00878727	0.231403	0.0285016
			0.0407164	0.257569	0.0312363		-0.0421998	0.222885	0.0321412		-0.00509185	0.232317	0.0289088
			0.0410633	0.257688	0.0316762		-0.0420386	0.22401	0.0325939		-0.000854384	0.234478	0.029316
			0.0417668	0.259368	0.0321161		-0.0388066	0.226072	0.0330466		-0.000468487	0.23511	0.0297231
			0.0423455	0.261439	0.0325561		-0.0382523	0.232487	0.0334993		0.0020014	0.237238	0.0301303
			0.0432446	0.261898	0.032996		-0.0337823	0.232856	0.033952		0.00322612	0.237427	0.0305375
			0.043297	0.263763	0.033436		-0.033753	0.23407	0.0344047		0.00552205	0.237917	0.0309446
			0.0466415	0.266522	0.0338759		-0.0287793	0.23565	0.0348574		0.00560856	0.238212	0.0313518
			0.0523409	0.266871	0.0343159		-0.0268295	0.236849	0.0353101		0.00625432	0.238504	0.031759
			0.0532135	0.267427	0.0347558		-0.0259168	0.240587	0.0357628		0.00627677	0.240144	0.0321661
			0.0534321	0.268028	0.0351958		-0.0253898	0.241254	0.0362155		0.00650189	0.240536	0.0325733
			0.0557106	0.269547	0.0356357		-0.0218897	0.244377	0.0366682		0.00654423	0.244275	0.0329805
			0.0599156	0.269608	0.0360757		-0.018133	0.245261	0.0371209		0.00851295	0.244937	0.0333876
			0.0619163	0.270681	0.0365156		-0.015071	0.245914	0.0375736		0.00912293	0.247503	0.0337948
			0.0628932	0.270919	0.0369556		-0.0146559	0.247065	0.0380263		0.0127858	0.250446	0.034202
			0.0640729	0.273994	0.0373955		-0.0135344	0.249721	0.0384789		0.0129401	0.251539	0.0346091
			0.0660656	0.274717	0.0378355		-0.0134546	0.25179	0.0389316		0.0169389	0.25234	0.0350163
			0.0667635	0.275773	0.0382754		-0.0126676	0.252864	0.0393843		0.0175181	0.252807	0.0354235
			0.0712101	0.276386	0.0387154		-0.011552	0.256644	0.039837		0.020762	0.253914	0.0358306
			0.0755963	0.276773	0.0391553		-0.0115136	0.256817	0.0402897		0.0239043	0.254402	0.0362378
			0.0776577	0.277045	0.0395952		-0.0110295	0.259497	0.0407424		0.0241187	0.254795	0.036645
			0.0821082	0.277448	0.0400352		-0.00868123	0.259717	0.0411951		0.0276955	0.258631	0.0370521
			0.0833078	0.278243	0.0404751		-0.00765701	0.260339	0.0416478		0.0289321	0.258823	0.0374593
			0.0910142	0.279358	0.0409151		-0.00381461	0.26272	0.0421005		0.0308385	0.260666	0.0378664
			0.0916217	0.281309	0.041355		-0.00310988	0.263668	0.0425532		0.0318373	0.260936	0.0382736
			0.0933058	0.282046	0.041795		-0.00169337	0.264462	0.0430059		0.0322426	0.261901	0.0386808
			0.0951591	0.283549	0.0422349		-0.00045953	0.267936	0.0434586		0.0359226	0.264685	0.0390879
			0.0984013	0.283849	0.0426749		-0.000167793	0.271193	0.0439113		0.0363409	0.265436	0.0394951
			0.100499	0.285259	0.0431148		0.000333035	0.271238	0.044364		0.0365667	0.265738	0.0399023
			0.10077	0.285297	0.0435548		0.00630877	0.271454	0.0448167		0.0414262	0.268678	0.0403094
			0.1013	0.28843	0.0439947		0.00970971	0.272331	0.0452694		0.0427803	0.268752	0.0407166
			0.102817	0.288492	0.0444347		0.0100267	0.272567	0.045722		0.045039	0.26933	0.0411238
			0.109612	0.291137	0.0448746		0.0111761	0.273635	0.0461747		0.046592	0.270559	0.0415309
			0.109692	0.291835	0.0453146		0.0120239	0.274221	0.0466274		0.0477186	0.270694	0.0419381
			0.113177	0.292923	0.0457545		0.0123091	0.274565	0.0470801		0.0519311	0.271192	0.0423453
			0.114213	0.29357	0.0461945		0.0139416	0.275232	0.0475328		0.0534935	0.273362	0.0427524
			0.120262	0.29404	0.0466344		0.0155814	0.279562	0.0479855		0.0576502	0.27568	0.0431596
			0.122712	0.295174	0.0470744		0.0164332	0.28045	0.0484382		0.0606063	0.275925	0.0435668
			0.123669	0.295233	0.0475143		0.0164682	0.282626	0.0488909		0.0614633	0.278844	0.0439739
			0.124215	0.299029	0.0479542		0.0166427	0.284021	0.0493436		0.0628922	0.279197	0.0443811
			0.125177	0.300504	0.0483942		0.0170775	0.285307	0.0497963		0.0646422	0.281941	0.0447883
			0.125456	0.300784	0.0488341		0.0201759	0.287262	0.050249		0.0646997	0.282409	0.0451954
			0.126384	0.301112	0.0492741		0.0203679	0.287631	0.0507017		0.0716603	0.282487	0.0456026
			0.128077	0.30128	0.049714		0.0216245	0.288118	0.0511544		0.072023	0.283866	0.0460098
			0.131245	0.301373	0.050154		0.0233093	0.288177	0.0516071		0.072032	0.284243	0.0464169
			0.132564	0.302895	0.0505939		0.0241114	0.289078	0.0520598		0.0744575	0.285133	0.0468241
			0.13748	0.303888	0.0510339		0.0246673	0.289086	0.0525124		0.0746046	0.285317	0.0472313
			0.143332	0.304391	0.0514738		0.0253297	0.289104	0.0529651		0.074907	0.287289	0.0476384
			0.143385	0.304985	0.0519138		0.025924	0.289141	0.0534178		0.0754787	0.288242	0.0480456
			0.154557	0.30517	0.0523537		0.0298304	0.290026	0.0538705		0.0754787	0.288355	0.0484528
			0.158957	0.305438	0.0527937		0.0307628	0.290028	0.0543232		0.0762915	0.290372	0.0488599
			0.160495	0.305879	0.0532336		0.0308625	0.291157	0.0547759		0.0773657	0.291039	0.0492671
			0.163001	0.306029	0.0536736		0.0353027	0.293281	0.0552286		0.0773907	0.291294	0.0496743
			0.163414	0.306209	0.0541135		0.0373067	0.293284	0.0556813		0.0774166	0.291732	0.0500814
			0.16745	0.307148	0.0545535		0.0399097	0.293584	0.056134		0.0799241	0.291816	0.0504886
			0.167778	0.308254	0.0549934		0.0410025	0.295282	0.0565867		0.0813531	0.295816	0.0508958
			0.167822	0.308869	0.0554333		0.041277	0.295619	0.0570394		0.082298	0.296174	0.0513029
			0.172183	0.309418	0.0558733		0.0433278	0.295714	0.0574921		0.0843778	0.296268	0.0517101
			0.172349	0.310163	0.0563132		0.0480468	0.297519	0.0579448		0.0848797	0.297931	0.0521173
			0.173063	0.312565	0.0567532		0.0483257	0.298739	0.0583975		0.0849358	0.298272	0.0525244
			0.173852	0.313929	0.0571931		0.0498193	0.299386	0.0588502		0.0866289	0.299109	0.0529316
			0.173973	0.31397	0.0576331		0.0511875	0.300248	0.0593029		0.0891826	0.300519	0.0533388
			0.176218	0.314045	0.058073		0.0515252	0.301146	0.0597555		0.08976	0.302203	0.0537459
			0.178439	0.314684	0.058513		0.051888	0.301921	0.0602082		0.0906142	0.303297	0.0541531
			0.178709	0.31653	0.0589529		0.0520644	0.302316	0.0606609		0.091426	0.303958	0.0545603
			0.179944	0.316649	0.0593929		0.0527233	0.303462	0.0611136		0.0922738	0.304051	0.0549674
			0.180521	0.317988	0.0598328		0.0577461	0.306693	0.0615663		0.0952917	0.304104	0.0553746
			0.183335	0.319132	0.0602728		0.0599327	0.307452	0.062019		0.0993417	0.304443	0.0557818
			0.183485	0.320727	0.0607127		0.0617462	0.308089	0.0624717		0.10003	0.304662	0.0561889
			0.185451	0.322417	0.0611527		0.0651101	0.311203	0.0629244		0.101141	0.305122	0.0565961
			0.185749	0.323239	0.0615926		0.0689464	0.312956	0.0633771		0.101945	0.305809	0.0570033
			0.189505	0.326521	0.0620326		0.0699022	0.31415	0.0638298		0.102357	0.306878	0.0574104
			0.189621	0.326564	0.0624725		0.0704052	0.314825	0.0642825		0.105649	0.308072	0.0578176
			0.192015	0.329442	0.0629125		0.0709843	0.315634	0.0647352		0.106442	0.308564	0.0582248
			0.192907	0.329472	0.0633524		0.0714139	0.316663	0.0651879		0.107078	0.308738	0.0586319
			0.193942	0.329628	0.0637923		0.0743158	0.317735	0.0656406		0.107556	0.310637	0.0590391
			0.194509	0.330554	0.0642323		0.0746668	0.318003	0.0660933		0.109242	0.31124	0.0594463
			0.194941	0.330934	0.0646722		0.075374	0.318005	0.0665459		0.112109	0.311812	0.0598534
			0.197333	0.331948	0.0651122		0.075499	0.31964	0.0669986		0.113011	0.314546	0.0602606
			0.198479	0.333039	0.0655521		0.0765747	0.319883	0.0674513		0.11342	0.3146	0.0606678
			0.199218	0.333138	0.0659921		0.0787195	0.320441	0.067904		0.113954	0.314654	0.0610749
			0.199669	0.334208	0.066432		0.0790698	0.321995	0.0683567		0.11607	0.315958	0.0614821
			0.200262	0.335597	0.066872		0.0803653	0.322511	0.0688094		0.11629	0.317233	0.0618893
			0.200588	0.336743	0.0673119		0.0817136	0.323577	0.0692621		0.119118	0.317963	0.0622964
			0.201146	0.338367	0.0677519		0.0825149	0.325806	0.0697148		0.11923	0.318942	0.0627036
			0.201187	0.339829	0.0681918		0.0832872	0.325907	0.0701675		0.121318	0.321974	0.0631107
			0.201778	0.340348	0.0686318		0.0841462	0.326869	0.0706202		0.125582	0.3226	0.0635179
			0.202045	0.340375	0.0690717		0.0851129	0.327692	0.0710729		0.126694	0.322603	0.0639251
			0.202123	0.340634	0.0695117		0.0857534	0.327736	0.0715256		0.127281	0.323354	0.0643322
			0.202859	0.341121	0.0699516		0.0869208	0.330106	0.0719783		0.130184	0.323614	0.0647394
			0.203259	0.341924	0.0703916		0.089765	0.330363	0.072431		0.130862	0.323975	0.0651466
			0.203618	0.342226	0.0708315		0.0901956	0.332787	0.0728837		0.131382	0.325461	0.0655537
			0.203764	0.3432	0.0712714		0.0930905	0.333802	0.0733364		0.131685	0.32611	0.0659609
			0.203831	0.344294	0.0717114		0.093671	0.334842	0.073789		0.132434	0.326568	0.0663681
			0.205928	0.345151	0.0721513		0.101895	0.336064	0.0742417		0.135526	0.326775	0.0667752
			0.206434	0.345904	0.0725913		0.103499	0.336507	0.0746944		0.136784	0.328903	0.0671824
			0.206801	0.346291	0.0730312		0.10459	0.338084	0.0751471		0.137917	0.329207	0.0675896
			0.207229	0.346571	0.0734712		0.106292	0.341526	0.0755998		0.138542	0.329688	0.0679967
			0.207603	0.347574	0.0739111		0.10836	0.342265	0.0760525		0.141496	0.331741	0.0684039
			0.207748	0.347583	0.0743511		0.108414	0.342621	0.0765052		0.142448	0.333841	0.0688111
			0.20885	0.350033	0.074791		0.10898	0.342906	0.0769579		0.145993	0.334231	0.0692182
			0.209475	0.350342	0.075231		0.10915	0.343355	0.0774106		0.148309	0.335481	0.0696254
			0.210022	0.35047	0.0756709		0.109265	0.343532	0.0778633		0.148598	0.338045	0.0700326
			0.212343	0.351038	0.0761109		0.113285	0.344147	0.078316		0.151415	0.33852	0.0704397
			0.212416	0.351198	0.0765508		0.11381	0.34444	0.0787687		0.152104	0.338859	0.0708469
			0.212547	0.351896	0.0769908		0.113939	0.344979	0.0792214		0.153127	0.338932	0.0712541
			0.213606	0.352464	0.0774307		0.114081	0.345088	0.0796741		0.153367	0.338987	0.0716612
			0.213669	0.353033	0.0778707		0.114239	0.34715	0.0801268		0.154294	0.339529	0.0720684
			0.215399	0.35352	0.0783106		0.11461	0.347918	0.0805794		0.155896	0.339994	0.0724756
			0.216027	0.353585	0.0787505		0.115178	0.348664	0.0810321		0.155903	0.340155	0.0728827
			0.217154	0.353796	0.0791905		0.115698	0.349399	0.0814848		0.15595	0.34037	0.0732899
			0.218376	0.354661	0.0796304		0.115717	0.350136	0.0819375		0.156352	0.34098	0.0736971
			0.218637	0.355368	0.0800704		0.118723	0.351395	0.0823902		0.157768	0.341557	0.0741042
			0.218952	0.355669	0.0805103		0.119537	0.351611	0.0828429		0.158817	0.342289	0.0745114
			0.221212	0.356083	0.0809503		0.119601	0.351967	0.0832956		0.160463	0.343323	0.0749186
			0.222748	0.35658	0.0813902		0.120374	0.352162	0.0837483		0.160776	0.343417	0.0753257
			0.222984	0.357577	0.0818302		0.120607	0.352806	0.084201		0.161279	0.345608	0.0757329
			0.223707	0.35829	0.0822701		0.121399	0.354748	0.0846537		0.162555	0.347613	0.0761401
			0.223817	0.358604	0.0827101		0.121452	0.354821	0.0851064		0.163818	0.348752	0.0765472
			0.22384	0.359034	0.08315		0.123548	0.355025	0.0855591		0.165866	0.34965	0.0769544
			0.223992	0.35974	0.08359		0.124282	0.360379	0.0860118		0.168027	0.35075	0.0773616
			0.224746	0.36055	0.0840299		0.12566	0.360497	0.0864645		0.169766	0.351051	0.0777687
			0.225304	0.360678	0.0844699		0.127319	0.360814	0.0869172		0.170162	0.351623	0.0781759
			0.22755	0.36076	0.0849098		0.128001	0.36276	0.0873699		0.170571	0.351909	0.0785831
			0.228832	0.361233	0.0853498		0.129732	0.362959	0.0878225		0.170941	0.35211	0.0789902
			0.232552	0.361934	0.0857897		0.129822	0.366656	0.0882752		0.17304	0.352297	0.0793974
			0.233335	0.362998	0.0862297		0.130627	0.367786	0.0887279		0.174366	0.352347	0.0798046
			0.2353	0.36423	0.0866696		0.130915	0.369815	0.0891806		0.175716	0.352412	0.0802117
			0.236062	0.3644	0.0871095		0.132171	0.371726	0.0896333		0.175938	0.352988	0.0806189
			0.238412	0.364411	0.0875495		0.133071	0.375161	0.090086		0.177079	0.357071	0.0810261
			0.238973	0.364533	0.0879894		0.133393	0.377322	0.0905387		0.178017	0.357254	0.0814332
			0.240915	0.365228	0.0884294		0.135756	0.378868	0.0909914		0.180413	0.357378	0.0818404
			0.242567	0.36546	0.0888693		0.136244	0.381027	0.0914441		0.180765	0.364728	0.0822476
			0.243995	0.369571	0.0893093		0.137523	0.381732	0.0918968		0.181932	0.365891	0.0826547
			0.245393	0.370578	0.0897492		0.139361	0.382608	0.0923495		0.182305	0.366412	0.0830619
			0.24761	0.37235	0.0901892		0.140003	0.384063	0.0928022		0.1826	0.367669	0.0834691
			0.247922	0.373252	0.0906291		0.1411	0.386193	0.0932549		0.185165	0.367907	0.0838762
			0.248104	0.374054	0.0910691		0.141575	0.386704	0.0937076		0.186024	0.368325	0.0842834
			0.248535	0.374715	0.091509		0.143349	0.387043	0.0941603		0.186397	0.368548	0.0846906
			0.250202	0.376368	0.091949		0.143713	0.38711	0.0946129		0.188428	0.368691	0.0850977
			0.250811	0.376379	0.0923889		0.144038	0.387145	0.0950656		0.191663	0.368819	0.0855049
			0.251181	0.376998	0.0928289		0.146515	0.38781	0.0955183		0.192908	0.369084	0.0859121
			0.256169	0.377855	0.0932688		0.149408	0.388522	0.095971		0.194008	0.369907	0.0863192
			0.256274	0.378341	0.0937088		0.150681	0.388982	0.0964237		0.196992	0.369925	0.0867264
			0.257411	0.378423	0.0941487		0.150724	0.38998	0.0968764		0.198494	0.370944	0.0871336
			0.257915	0.379669	0.0945886		0.151161	0.391357	0.0973291		0.198638	0.371091	0.0875407
			0.260125	0.380611	0.0950286		0.152994	0.392065	0.0977818		0.199458	0.371409	0.0879479
			0.261029	0.380793	0.0954685		0.153386	0.393073	0.0982345		0.201112	0.372007	0.088355
			0.263779	0.382361	0.0959085		0.155423	0.395318	0.0986872		0.20323	0.372575	0.0887622
			0.265657	0.383268	0.0963484		0.155707	0.395804	0.0991399		0.205052	0.372592	0.0891694
			0.266927	0.383452	0.0967884		0.155953	0.398224	0.0995926		0.205889	0.374527	0.0895765
			0.268349	0.383823	0.0972283		0.157219	0.398875	0.100045		0.207361	0.374598	0.0899837
			0.268691	0.385768	0.0976683		0.157487	0.399384	0.100498		0.209281	0.374946	0.0903909
			0.268819	0.388945	0.0981082		0.1578	0.399525	0.100951		0.210373	0.376767	0.090798
			0.269705	0.390102	0.0985482		0.159062	0.400741	0.101403		0.211865	0.37704	0.0912052
			0.269905	0.390281	0.0989881		0.159194	0.400985	0.101856		0.212541	0.377086	0.0916124
			0.270533	0.390328	0.0994281		0.159279	0.401276	0.102309		0.216568	0.378047	0.0920195
			0.271402	0.390583	0.099868		0.160686	0.403167	0.102761		0.22049	0.379228	0.0924267
			0.273755	0.392118	0.100308		0.160696	0.40549	0.103214		0.221249	0.379947	0.0928339
			0.275503	0.392552	0.100748		0.160927	0.409093	0.103667		0.221584	0.380118	0.093241
			0.276006	0.393997	0.101188		0.161459	0.409595	0.10412		0.221726	0.380594	0.0936482
			0.276216	0.394067	0.101628		0.163804	0.410272	0.104572		0.223028	0.380718	0.0940554
			0.276603	0.394253	0.102068		0.164299	0.410341	0.105025		0.22337	0.381474	0.0944625
			0.276714	0.394368	0.102508		0.164593	0.413674	0.105478		0.223961	0.38149	0.0948697
			0.277395	0.394693	0.102948		0.165317	0.413901	0.10593		0.224283	0.383007	0.0952769
			0.27743	0.395372	0.103388		0.165949	0.414386	0.106383		0.224992	0.38452	0.095684
			0.277646	0.395804	0.103828		0.166253	0.41447	0.106836		0.225899	0.385002	0.0960912
			0.277757	0.396519	0.104267		0.169764	0.414832	0.107288		0.22711	0.385729	0.0964984
			0.278073	0.397154	0.104707		0.169786	0.414966	0.107741		0.227512	0.387034	0.0969055
			0.279316	0.397414	0.105147		0.17004	0.416447	0.108194		0.228729	0.389905	0.0973127
			0.279891	0.399387	0.105587		0.170396	0.41689	0.108646		0.229018	0.390878	0.0977199
			0.282741	0.401446	0.106027		0.170909	0.417257	0.109099		0.231248	0.391008	0.098127
			0.283387	0.401643	0.106467		0.171172	0.418706	0.109552		0.232126	0.393181	0.0985342
			0.284555	0.401743	0.106907		0.173323	0.42031	0.110005		0.233059	0.393758	0.0989414
			0.284675	0.402062	0.107347		0.174099	0.420367	0.110457		0.233114	0.394819	0.0993485
			0.285331	0.402128	0.107787		0.174119	0.420716	0.11091		0.233975	0.395299	0.0997557
			0.285694	0.402202	0.108227		0.176092	0.421623	0.111363		0.234122	0.395474	0.100163
			0.285955	0.402215	0.108667		0.177262	0.422589	0.111815		0.23473	0.39629	0.10057
			0.28975	0.404608	0.109107		0.177802	0.42342	0.112268		0.236318	0.396672	0.100977
			0.289762	0.406482	0.109547		0.178011	0.424077	0.112721		0.236352	0.397882	0.101384
			0.29084	0.407952	0.109987		0.179029	0.424441	0.113173		0.236472	0.397961	0.101792
			0.295867	0.407957	0.110427		0.180835	0.42528	0.113626		0.236832	0.39816	0.102199
			0.297748	0.409126	0.110867		0.181759	0.427399	0.114079		0.238705	0.39871	0.102606
			0.29815	0.409318	0.111307		0.183235	0.428606	0.114531		0.239584	0.399538	0.103013
			0.298926	0.409716	0.111747		0.183479	0.428876	0.114984		0.24062	0.400411	0.10342
			0.301427	0.414775	0.112187		0.18505	0.429565	0.115437		0.240734	0.400466	0.103827
			0.302447	0.416187	0.112626		0.185992	0.430332	0.11589		0.243563	0.402191	0.104235
			0.30338	0.416312	0.113066		0.1872	0.432345	0.116342		0.244489	0.402924	0.104642
			0.303621	0.416692	0.113506		0.187708	0.434688	0.116795		0.245597	0.403631	0.105049
			0.303728	0.416838	0.113946		0.188249	0.43493	0.117248		0.245876	0.40378	0.105456
			0.304193	0.41725	0.114386		0.189784	0.435975	0.1177		0.246446	0.405132	0.105863
			0.305569	0.418142	0.114826		0.189816	0.438129	0.118153		0.246656	0.406253	0.10627
			0.305869	0.4185	0.115266		0.190392	0.438823	0.118606		0.247653	0.406971	0.106678
			0.306045	0.419382	0.115706		0.191413	0.440583	0.119058		0.24769	0.408095	0.107085
			0.308666	0.420967	0.116146		0.192029	0.440782	0.119511		0.247762	0.408255	0.107492
			0.312638	0.421698	0.116586		0.192415	0.441756	0.119964		0.248881	0.409249	0.107899
			0.313701	0.421754	0.117026		0.194078	0.442382	0.120416		0.249967	0.410273	0.108306
			0.313977	0.4218	0.117466		0.19432	0.444143	0.120869		0.251005	0.411053	0.108713
			0.315955	0.421809	0.117906		0.194691	0.444313	0.121322		0.251788	0.411921	0.109121
			0.317215	0.421826	0.118346		0.19485	0.444803	0.121775		0.251913	0.413527	0.109528
			0.317502	0.422489	0.118786		0.19546	0.445101	0.122227		0.252802	0.413822	0.109935
			0.317666	0.422549	0.119226		0.195564	0.446208	0.12268		0.253036	0.415402	0.110342
			0.318509	0.422894	0.119666		0.195622	0.446584	0.123133		0.253321	0.415599	0.110749
			0.318718	0.423822	0.120106		0.197108	0.446913	0.123585		0.254257	0.416187	0.111156
			0.320468	0.424031	0.120546		0.197565	0.447917	0.124038		0.254908	0.416314	0.111564
			0.321333	0.42421	0.120985		0.199993	0.44831	0.124491		0.25544	0.416857	0.111971
			0.321928	0.424417	0.121425		0.200158	0.448661	0.124943		0.25554	0.417743	0.112378
			0.324806	0.424792	0.121865		0.200392	0.449863	0.125396		0.256157	0.420134	0.112785
			0.325533	0.424844	0.122305		0.200438	0.451973	0.125849		0.25779	0.420524	0.113192
			0.326489	0.426596	0.122745		0.201251	0.452247	0.126301		0.260596	0.420637	0.113599
			0.328437	0.427766	0.123185		0.203018	0.452561	0.126754		0.261107	0.420895	0.114007
			0.328551	0.427961	0.123625		0.203342	0.453133	0.127207		0.261457	0.423021	0.114414
			0.330488	0.428986	0.124065		0.203634	0.453563	0.12766		0.261839	0.423457	0.114821
			0.330611	0.429619	0.124505		0.203906	0.454414	0.128112		0.262868	0.423945	0.115228
			0.331161	0.43095	0.124945		0.204411	0.454931	0.128565		0.267036	0.426304	0.115635
			0.332585	0.431068	0.125385		0.205599	0.456961	0.129018		0.267622	0.42642	0.116042
			0.332731	0.431756	0.125825		0.20567	0.457218	0.12947		0.268951	0.426958	0.11645
			0.333069	0.432356	0.126265		0.207299	0.459032	0.129923		0.269947	0.427523	0.116857
			0.33436	0.433039	0.126705		0.20767	0.460473	0.130376		0.272792	0.428214	0.117264
			0.334978	0.433553	0.127145		0.209401	0.462136	0.130828		0.275784	0.428747	0.117671
			0.334999	0.434084	0.127585		0.210191	0.462218	0.131281		0.275969	0.430162	0.118078
			0.335378	0.435888	0.128025		0.210379	0.462574	0.131734		0.276186	0.430722	0.118485
			0.335974	0.436219	0.128465		0.2108	0.462762	0.132187		0.277121	0.431578	0.118893
			0.336157	0.437427	0.128905		0.210806	0.462972	0.132639		0.280682	0.431698	0.1193
			0.336925	0.43756	0.129344		0.211295	0.463446	0.133092		0.280929	0.431832	0.119707
			0.337675	0.437876	0.129784		0.21159	0.463456	0.133545		0.281455	0.432239	0.120114
			0.337911	0.438466	0.130224		0.212377	0.463841	0.133997		0.282224	0.432338	0.120521
			0.338167	0.439373	0.130664		0.213016	0.465276	0.13445		0.282697	0.435075	0.120928
			0.338671	0.439461	0.131104		0.213222	0.465357	0.134903		0.283006	0.435403	0.121336
			0.338803	0.441473	0.131544		0.214779	0.465763	0.135355		0.283514	0.435458	0.121743
			0.33936	0.44178	0.131984		0.21785	0.466179	0.135808		0.284141	0.436194	0.12215
			0.339441	0.442119	0.132424		0.21813	0.466199	0.136261		0.285949	0.436288	0.122557
			0.341613	0.443612	0.132864		0.218514	0.466781	0.136713		0.286346	0.436794	0.122964
			0.342474	0.444283	0.133304		0.218523	0.467157	0.137166		0.287663	0.436927	0.123371
			0.342551	0.444544	0.133744		0.218838	0.467628	0.137619		0.287735	0.437694	0.123779
			0.342918	0.444619	0.134184		0.219152	0.468082	0.138072		0.287829	0.438041	0.124186
			0.343814	0.444635	0.134624		0.219615	0.468426	0.138524		0.288734	0.438074	0.124593
			0.344022	0.444717	0.135064		0.221447	0.469172	0.138977		0.289331	0.438637	0.125
			0.344088	0.446323	0.135504		0.221517	0.469636	0.13943		0.29052	0.439186	0.125407
			0.34442	0.446348	0.135944		0.221843	0.470665	0.139882		0.290574	0.440778	0.125814
			0.344465	0.446423	0.136384		0.222242	0.471111	0.140335		0.291272	0.440958	0.126221
			0.345058	0.446759	0.136824		0.22266	0.472018	0.140788		0.291295	0.441771	0.126629
			0.345517	0.448132	0.137264		0.22278	0.474327	0.14124		0.291471	0.442516	0.127036
			0.345851	0.450745	0.137703		0.222879	0.474433	0.141693		0.293291	0.442566	0.127443
			0.348274	0.450974	0.138143		0.222927	0.474917	0.142146		0.293511	0.442907	0.12785
			0.349312	0.45099	0.138583		0.223405	0.475298	0.142598		0.29386	0.444446	0.128257
			0.35179	0.451642	0.139023		0.223739	0.477378	0.143051		0.294576	0.444838	0.128664
			0.351923	0.451829	0.139463		0.225025	0.47874	0.143504		0.294928	0.444866	0.129072
			0.35415	0.453579	0.139903		0.225289	0.47911	0.143957		0.295249	0.446483	0.129479
			0.354641	0.453915	0.140343		0.225309	0.479512	0.144409		0.29541	0.44735	0.129886
			0.354919	0.454203	0.140783		0.225572	0.479629	0.144862		0.297373	0.447377	0.130293
			0.356898	0.455205	0.141223		0.226567	0.479706	0.145315		0.29905	0.449488	0.1307
			0.35779	0.4554	0.141663		0.22758	0.480605	0.145767		0.299648	0.450198	0.131107
			0.358472	0.455639	0.142103		0.230551	0.481124	0.14622		0.29993	0.452192	0.131515
			0.359717	0.456529	0.142543		0.231357	0.482486	0.146673		0.300294	0.452896	0.131922
			0.360331	0.456632	0.142983		0.232414	0.483552	0.147125		0.300704	0.454802	0.132329
			0.361269	0.457692	0.143423		0.232957	0.483616	0.147578		0.301031	0.45525	0.132736
			0.362191	0.4578	0.143863		0.235562	0.484974	0.148031		0.30236	0.45562	0.133143
			0.362402	0.457949	0.144303		0.236238	0.485053	0.148483		0.302525	0.455974	0.13355
			0.362838	0.459199	0.144743		0.236522	0.485549	0.148936		0.303067	0.456562	0.133958
			0.364409	0.459252	0.145183		0.236944	0.486751	0.149389		0.303188	0.456814	0.134365
			0.365544	0.46087	0.145623		0.237075	0.487276	0.149842		0.30596	0.45719	0.134772
			0.365594	0.461132	0.146062		0.237719	0.487358	0.150294		0.308946	0.458166	0.135179
			0.365741	0.46155	0.146502		0.238342	0.489028	0.150747		0.309259	0.458867	0.135586
			0.366137	0.461712	0.146942		0.239163	0.489166	0.1512		0.309869	0.458924	0.135993
			0.36641	0.461897	0.147382		0.239493	0.489894	0.151652		0.310715	0.459057	0.136401
			0.366481	0.462031	0.147822		0.241486	0.490827	0.152105		0.312853	0.46078	0.136808
			0.367875	0.462589	0.148262		0.242922	0.493267	0.152558		0.315754	0.460957	0.137215
			0.37306	0.462692	0.148702		0.242925	0.493387	0.15301		0.316019	0.461992	0.137622
			0.373449	0.463587	0.149142		0.243758	0.494338	0.153463		0.317026	0.464823	0.138029
			0.373459	0.464042	0.149582		0.243905	0.495281	0.153916		0.319309	0.464905	0.138436
			0.373711	0.464989	0.150022		0.244002	0.495536	0.154368		0.321968	0.46628	0.138844
			0.373929	0.46524	0.150462		0.24473	0.496525	0.154821		0.322557	0.4672	0.139251
			0.374822	0.465423	0.150902		0.245472	0.497105	0.155274		0.323749	0.469248	0.139658
			0.37598	0.467379	0.151342		0.246299	0.497343	0.155727		0.32457	0.469725	0.140065
			0.37712	0.467591	0.151782		0.246545	0.498084	0.156179		0.326853	0.470498	0.140472
			0.377151	0.467701	0.152222		0.2473	0.49824	0.156632		0.327084	0.470745	0.140879
			0.377903	0.469041	0.152662		0.248466	0.500071	0.157085		0.328026	0.470854	0.141287
			0.378447	0.469337	0.153102		0.248804	0.500373	0.157537		0.328101	0.471561	0.141694
			0.378533	0.469377	0.153542		0.249307	0.503231	0.15799		0.328172	0.472659	0.142101
			0.379792	0.46948	0.153982		0.249533	0.503558	0.158443		0.32854	0.473126	0.142508
			0.381757	0.469642	0.154421		0.249737	0.505715	0.158895		0.32862	0.473662	0.142915
			0.381857	0.470628	0.154861		0.250051	0.506835	0.159348		0.328623	0.473794	0.143322
			0.383487	0.470778	0.155301		0.251403	0.508097	0.159801		0.32892	0.475029	0.14373
			0.384331	0.470927	0.155741		0.251811	0.508373	0.160254		0.330501	0.475662	0.144137
			0.385201	0.473102	0.156181		0.251902	0.508507	0.160706		0.330738	0.476161	0.144544
			0.385766	0.473148	0.156621		0.25267	0.509166	0.161159		0.330909	0.476837	0.144951
			0.385806	0.473369	0.157061		0.254221	0.509928	0.161612		0.331632	0.476928	0.145358
			0.386067	0.474526	0.157501		0.255384	0.511029	0.162064		0.335367	0.477205	0.145765
			0.386078	0.475294	0.157941		0.256133	0.511862	0.162517		0.336854	0.477995	0.146173
			0.386746	0.47578	0.158381		0.256416	0.511966	0.16297		0.337977	0.478138	0.14658
			0.387399	0.475875	0.158821		0.258424	0.513156	0.163422		0.339269	0.478673	0.146987
			0.390453	0.47604	0.159261		0.259353	0.513319	0.163875		0.340084	0.480567	0.147394
			0.390634	0.476753	0.159701		0.261184	0.513758	0.164328		0.340293	0.480973	0.147801
			0.390652	0.477009	0.160141		0.263334	0.514319	0.16478		0.341021	0.481358	0.148208
			0.391762	0.477549	0.160581		0.264921	0.516757	0.165233		0.343594	0.482879	0.148616
			0.392567	0.477685	0.161021		0.265246	0.518796	0.165686		0.344886	0.483343	0.149023
			0.393105	0.47814	0.161461		0.26666	0.519277	0.166139		0.344992	0.483739	0.14943
			0.393213	0.478526	0.161901		0.268819	0.519477	0.166591		0.345812	0.483874	0.149837
			0.393907	0.478556	0.162341		0.270353	0.520048	0.167044		0.345833	0.484576	0.150244
			0.394023	0.478697	0.16278		0.270395	0.52089	0.167497		0.346508	0.48459	0.150651
			0.394098	0.478827	0.16322		0.271778	0.520908	0.167949		0.347398	0.484592	0.151059
			0.395122	0.479062	0.16366		0.275476	0.522602	0.168402		0.347528	0.485267	0.151466
			0.396699	0.4792	0.1641		0.277315	0.524273	0.168855		0.347635	0.485579	0.151873
			0.399486	0.480117	0.16454		0.277478	0.524449	0.169307		0.348249	0.48629	0.15228
			0.400494	0.481145	0.16498		0.277945	0.524531	0.16976		0.348811	0.486468	0.152687
			0.401495	0.481317	0.16542		0.279037	0.525832	0.170213		0.350336	0.487276	0.153094
			0.403652	0.481346	0.16586		0.281006	0.527173	0.170665		0.351893	0.487518	0.153502
			0.404513	0.482413	0.1663		0.281336	0.527484	0.171118		0.352695	0.488056	0.153909
			0.404707	0.482748	0.16674		0.281438	0.528235	0.171571		0.354059	0.488391	0.154316
			0.406262	0.483634	0.16718		0.281764	0.529115	0.172024		0.355019	0.490615	0.154723
			0.406476	0.483727	0.16762		0.282472	0.530447	0.172476		0.355534	0.490726	0.15513
			0.407041	0.484932	0.16806		0.282843	0.53048	0.172929		0.355628	0.491552	0.155537
			0.40775	0.485368	0.1685		0.283971	0.531332	0.173382		0.356453	0.492533	0.155945
			0.409092	0.485469	0.16894		0.284079	0.532184	0.173834		0.35748	0.493015	0.156352
			0.40916	0.486036	0.16938		0.284206	0.532793	0.174287		0.357998	0.493912	0.156759
			0.410165	0.487053	0.16982		0.284584	0.532836	0.17474		0.359411	0.494103	0.157166
			0.411327	0.487806	0.17026		0.285289	0.533566	0.175192		0.363272	0.494288	0.157573
			0.411999	0.489424	0.1707		0.285294	0.53402	0.175645		0.363755	0.494641	0.15798
			0.413169	0.490391	0.171139		0.286078	0.534721	0.176098		0.363891	0.494843	0.158388
			0.41345	0.49072	0.171579		0.286181	0.535491	0.17655		0.364276	0.494846	0.158795
			0.415211	0.491417	0.172019		0.286392	0.535531	0.177003		0.364822	0.495257	0.159202
			0.416506	0.492183	0.172459		0.286466	0.536784	0.177456		0.364864	0.4955	0.159609
			0.416895	0.493045	0.172899		0.287668	0.537492	0.177909		0.365307	0.496406	0.160016
			0.420037	0.497417	0.173339		0.288578	0.537941	0.178361		0.367487	0.49846	0.160423
			0.42178	0.497655	0.173779		0.288621	0.539507	0.178814		0.367796	0.498949	0.160831
			0.421791	0.497773	0.174219		0.288627	0.539753	0.179267		0.368063	0.501003	0.161238
			0.422288	0.498378	0.174659		0.289213	0.540654	0.179719		0.368979	0.501143	0.161645
			0.422611	0.499589	0.175099		0.28944	0.540848	0.180172		0.370366	0.502106	0.162052
			0.424224	0.499999	0.175539		0.291041	0.541522	0.180625		0.370582	0.502402	0.162459
			0.425499	0.500015	0.175979		0.291264	0.542028	0.181077		0.370724	0.503106	0.162866
			0.42569	0.500858	0.176419		0.292216	0.542091	0.18153		0.371342	0.50326	0.163274
			0.425901	0.500958	0.176859		0.292742	0.542567	0.181983		0.372026	0.503501	0.163681
			0.427493	0.502683	0.177299		0.293331	0.54325	0.182435		0.372164	0.504158	0.164088
			0.42821	0.50329	0.177739		0.293537	0.543726	0.182888		0.372422	0.504613	0.164495
			0.428482	0.503406	0.178179		0.29445	0.543789	0.183341		0.372793	0.504617	0.164902
			0.429512	0.503769	0.178619		0.294962	0.544117	0.183794		0.372918	0.50477	0.165309
			0.430577	0.503838	0.179059		0.295012	0.544934	0.184246		0.373903	0.505303	0.165717
			0.430743	0.504277	0.179498		0.297376	0.54546	0.184699		0.374824	0.509387	0.166124
			0.43088	0.504824	0.179938		0.298221	0.546804	0.185152		0.377233	0.510427	0.166531
			0.431008	0.504934	0.180378		0.2984	0.547617	0.185604		0.379594	0.511674	0.166938
			0.431614	0.505543	0.180818		0.298421	0.548576	0.186057		0.379857	0.512238	0.167345
			0.431853	0.506046	0.181258		0.298967	0.54858	0.18651		0.380232	0.51388	0.167752
			0.43305	0.506931	0.181698		0.30117	0.548993	0.186962		0.381591	0.51489	0.16816
			0.4335	0.507118	0.182138		0.303245	0.550594	0.187415		0.381834	0.514981	0.168567
			0.4336	0.507171	0.182578		0.303743	0.551128	0.187868		0.382912	0.515499	0.168974
			0.43398	0.507355	0.183018		0.303973	0.552936	0.188321		0.383787	0.516589	0.169381
			0.434023	0.508173	0.183458		0.304724	0.556931	0.188773		0.38517	0.517279	0.169788
			0.434459	0.508259	0.183898		0.305656	0.557835	0.189226		0.386871	0.518795	0.170195
			0.434606	0.509509	0.184338		0.306818	0.558128	0.189679		0.387191	0.519506	0.170603
			0.434687	0.509944	0.184778		0.307813	0.559889	0.190131		0.387469	0.520046	0.17101
			0.434757	0.510041	0.185218		0.307846	0.560448	0.190584		0.387477	0.520249	0.171417
			0.436216	0.51119	0.185658		0.308087	0.560866	0.191037		0.387728	0.521032	0.171824
			0.436619	0.511287	0.186098		0.308952	0.562148	0.191489		0.388923	0.521813	0.172231
			0.437518	0.512069	0.186538		0.309511	0.562466	0.191942		0.392047	0.522195	0.172638
			0.437841	0.512149	0.186978		0.309533	0.562771	0.192395		0.393442	0.522591	0.173046
			0.438851	0.513511	0.187418		0.309553	0.563225	0.192847		0.394119	0.523046	0.173453
			0.439156	0.514005	0.187857		0.30979	0.563779	0.1933		0.394319	0.524212	0.17386
			0.439428	0.514816	0.188297		0.310176	0.564844	0.193753		0.394789	0.524715	0.174267
			0.439784	0.517062	0.188737		0.311092	0.566282	0.194206		0.3952	0.524974	0.174674
			0.440014	0.517339	0.189177		0.311838	0.566999	0.194658		0.395867	0.525566	0.175081
			0.440109	0.517745	0.189617		0.313355	0.567063	0.195111		0.395885	0.526008	0.175489
			0.440958	0.517932	0.190057		0.313647	0.567175	0.195564		0.396676	0.526694	0.175896
			0.441184	0.518456	0.190497		0.31387	0.567229	0.196016		0.398437	0.526892	0.176303
			0.441375	0.518836	0.190937		0.317749	0.567796	0.196469		0.398588	0.527162	0.17671
			0.442321	0.519245	0.191377		0.317899	0.568794	0.196922		0.399308	0.527527	0.177117
			0.44342	0.51932	0.191817		0.318131	0.568957	0.197374		0.399371	0.528364	0.177524
			0.444439	0.520131	0.192257		0.318252	0.571109	0.197827		0.400461	0.531011	0.177932
			0.445801	0.520739	0.192697		0.318261	0.571135	0.19828		0.400578	0.532824	0.178339
			0.446275	0.520802	0.193137		0.32026	0.571887	0.198732		0.400927	0.533657	0.178746
			0.447395	0.520859	0.193577		0.321336	0.572712	0.199185		0.401471	0.534772	0.179153
			0.44793	0.521925	0.194017		0.32174	0.573362	0.199638		0.403779	0.534931	0.17956
			0.448414	0.522706	0.194457		0.321971	0.575013	0.200091		0.404761	0.535288	0.179967
			0.448565	0.523012	0.194897		0.322876	0.57654	0.200543		0.404964	0.535313	0.180375
			0.451488	0.523093	0.195337		0.323673	0.577179	0.200996		0.405737	0.536103	0.180782
			0.451511	0.524415	0.195777		0.32396	0.577786	0.201449		0.405753	0.536278	0.181189
			0.451749	0.524743	0.196216		0.324258	0.578378	0.201901		0.406026	0.536362	0.181596
			0.451904	0.525228	0.196656		0.324773	0.578782	0.202354		0.40855	0.536857	0.182003
			0.453922	0.525236	0.197096		0.324882	0.579665	0.202807		0.408653	0.537784	0.18241
			0.454827	0.526385	0.197536		0.325078	0.579779	0.203259		0.409147	0.537873	0.182818
			0.45539	0.52763	0.197976		0.326099	0.580039	0.203712		0.409533	0.540294	0.183225
			0.455854	0.527894	0.198416		0.327178	0.580044	0.204165		0.409969	0.540796	0.183632
			0.456161	0.528628	0.198856		0.327875	0.580782	0.204617		0.410756	0.541704	0.184039
			0.456215	0.531947	0.199296		0.328089	0.581475	0.20507		0.41197	0.542034	0.184446
			0.456528	0.532688	0.199736		0.329281	0.581991	0.205523		0.412818	0.542063	0.184853
			0.459025	0.532759	0.200176		0.329727	0.582099	0.205976		0.413014	0.542523	0.185261
			0.459516	0.534181	0.200616		0.331058	0.582404	0.206428		0.41308	0.542844	0.185668
			0.461035	0.534572	0.201056		0.331326	0.584028	0.206881		0.414309	0.543418	0.186075
			0.46163	0.534728	0.201496		0.331984	0.585189	0.207334		0.414707	0.548582	0.186482
			0.46226	0.53548	0.201936		0.332726	0.58559	0.207786		0.415474	0.549565	0.186889
			0.46233	0.536301	0.202376		0.333432	0.586277	0.208239		0.417098	0.549673	0.187296
			0.462381	0.536693	0.202816		0.334534	0.58671	0.208692		0.42052	0.549917	0.187704
			0.462933	0.536866	0.203256		0.335476	0.587009	0.209144		0.420912	0.551277	0.188111
			0.463227	0.538252	0.203696		0.335963	0.588048	0.209597		0.421038	0.551607	0.188518
			0.463702	0.538275	0.204136		0.336455	0.589002	0.21005		0.421562	0.552757	0.188925
			0.467447	0.539567	0.204575		0.337427	0.589312	0.210502		0.423777	0.552999	0.189332
			0.467483	0.539768	0.205015		0.338442	0.590268	0.210955		0.423942	0.553314	0.189739
			0.467507	0.54025	0.205455		0.338961	0.591662	0.211408		0.425949	0.553882	0.190147
			0.470045	0.540433	0.205895		0.338969	0.593184	0.211861		0.426096	0.554725	0.190554
			0.470473	0.54124	0.206335		0.339357	0.593773	0.212313		0.427656	0.555357	0.190961
			0.47078	0.541264	0.206775		0.33988	0.595895	0.212766		0.427916	0.555364	0.191368
			0.471281	0.541679	0.207215		0.342657	0.59743	0.213219		0.428633	0.5561	0.191775
			0.471698	0.542329	0.207655		0.342848	0.597523	0.213671		0.430633	0.557037	0.192182
			0.471836	0.542942	0.208095		0.34294	0.597537	0.214124		0.432246	0.558902	0.19259
			0.472984	0.543077	0.208535		0.343148	0.597886	0.214577		0.43253	0.559047	0.192997
			0.474152	0.543473	0.208975		0.343997	0.598151	0.215029		0.435007	0.559086	0.193404
			0.475425	0.544669	0.209415		0.344412	0.599827	0.215482		0.435007	0.559671	0.193811
			0.476239	0.544782	0.209855		0.344722	0.599885	0.215935		0.435625	0.559846	0.194218
			0.47754	0.544806	0.210295		0.346448	0.600392	0.216388		0.436525	0.560022	0.194625
			0.477591	0.544808	0.210735		0.347064	0.600991	0.21684		0.437827	0.560453	0.195033
			0.477613	0.54688	0.211175		0.347441	0.60267	0.217293		0.438219	0.563143	0.19544
			0.478552	0.546955	0.211615		0.350167	0.602734	0.217746		0.438767	0.563542	0.195847
			0.478636	0.550394	0.212055		0.353423	0.602889	0.218198		0.439171	0.564113	0.196254
			0.478781	0.550427	0.212495		0.353497	0.604307	0.218651		0.440699	0.564373	0.196661
			0.479491	0.551069	0.212934		0.3535	0.60437	0.219104		0.442335	0.564864	0.197068
			0.480128	0.551306	0.213374		0.353791	0.604634	0.219556		0.442654	0.56512	0.197476
			0.480162	0.552977	0.213814		0.353987	0.604866	0.220009		0.44302	0.566294	0.197883
			0.480615	0.553	0.214254		0.354789	0.604888	0.220462		0.443626	0.566529	0.19829
			0.48109	0.553095	0.214694		0.355412	0.606413	0.220914		0.443952	0.567116	0.198697
			0.481761	0.554029	0.215134		0.355448	0.606983	0.221367		0.44409	0.567717	0.199104
			0.483066	0.55512	0.215574		0.355872	0.607551	0.22182		0.444366	0.567733	0.199511
			0.483777	0.55523	0.216014		0.355923	0.607971	0.222273		0.445734	0.569382	0.199919
			0.485022	0.555316	0.216454		0.356182	0.60829	0.222725		0.445908	0.570868	0.200326
			0.488779	0.555919	0.216894		0.357194	0.609431	0.223178		0.446604	0.571333	0.200733
			0.490027	0.556404	0.217334		0.357933	0.609479	0.223631		0.446971	0.572239	0.20114
			0.491097	0.55783	0.217774		0.358585	0.613523	0.224083		0.447589	0.573351	0.201547
			0.492402	0.559146	0.218214		0.358692	0.613895	0.224536		0.447725	0.573823	0.201954
			0.492664	0.559735	0.218654		0.359964	0.614052	0.224989		0.450561	0.574637	0.202362
			0.492698	0.560037	0.219094		0.362057	0.614214	0.225441		0.451237	0.574689	0.202769
			0.493627	0.560459	0.219534		0.363417	0.615397	0.225894		0.451326	0.574876	0.203176
			0.493833	0.560528	0.219974		0.364143	0.615848	0.226347		0.451931	0.575955	0.203583
			0.496081	0.560557	0.220414		0.364671	0.617138	0.226799		0.452117	0.576926	0.20399
			0.496237	0.56146	0.220853		0.3647	0.617161	0.227252		0.452325	0.577661	0.204397
			0.497486	0.561765	0.221293		0.365823	0.617496	0.227705		0.452893	0.577761	0.204805
			0.497607	0.561772	0.221733		0.36707	0.618118	0.228158		0.453448	0.577781	0.205212
			0.498228	0.562469	0.222173		0.367143	0.619739	0.22861		0.453649	0.577913	0.205619
			0.500816	0.562578	0.222613		0.367571	0.621141	0.229063		0.453849	0.578651	0.206026
			0.501023	0.563067	0.223053		0.36778	0.621149	0.229516		0.453936	0.579199	0.206433
			0.501184	0.564441	0.223493		0.367902	0.621822	0.229968		0.45405	0.5798	0.20684
			0.502156	0.564753	0.223933		0.368412	0.623233	0.230421		0.454167	0.58009	0.207248
			0.503575	0.56624	0.224373		0.368722	0.623447	0.230874		0.45419	0.580448	0.207655
			0.503978	0.568863	0.224813		0.369382	0.624332	0.231326		0.454684	0.580483	0.208062
			0.504494	0.569254	0.225253		0.369394	0.624892	0.231779		0.455755	0.581111	0.208469
			0.505519	0.569607	0.225693		0.369626	0.625037	0.232232		0.456152	0.584125	0.208876
			0.505538	0.569815	0.226133		0.369682	0.626487	0.232684		0.456297	0.584341	0.209283
			0.505641	0.570273	0.226573		0.370113	0.626848	0.233137		0.457133	0.584438	0.209691
			0.506105	0.570403	0.227013		0.370574	0.628113	0.23359		0.457304	0.585548	0.210098
			0.50654	0.570537	0.227453		0.372277	0.628283	0.234043		0.457838	0.585958	0.210505
			0.507327	0.571311	0.227893		0.372397	0.628829	0.234495		0.458013	0.586479	0.210912
			0.508454	0.571728	0.228333		0.373193	0.630121	0.234948		0.458841	0.591129	0.211319
			0.511615	0.572276	0.228773		0.374772	0.631334	0.235401		0.458892	0.591627	0.211726
			0.512421	0.572618	0.229212		0.375355	0.631587	0.235853		0.459374	0.593441	0.212134
			0.512686	0.573164	0.229652		0.375473	0.632031	0.236306		0.459383	0.595103	0.212541
			0.513928	0.573411	0.230092		0.376284	0.632344	0.236759		0.459451	0.595491	0.212948
			0.515942	0.573526	0.230532		0.376758	0.632961	0.237211		0.461619	0.5958	0.213355
			0.519401	0.574297	0.230972		0.377115	0.633546	0.237664		0.462412	0.597748	0.213762
			0.520965	0.574884	0.231412		0.377309	0.633583	0.238117		0.462937	0.59782	0.214169
			0.521056	0.5761	0.231852		0.377686	0.633922	0.238569		0.464298	0.59798	0.214577
			0.521233	0.576283	0.232292		0.378132	0.635803	0.239022		0.464298	0.598481	0.214984
			0.521521	0.576499	0.232732		0.378672	0.636157	0.239475		0.467334	0.59854	0.215391
			0.522915	0.57664	0.233172		0.378675	0.63653	0.239928		0.468929	0.600295	0.215798
			0.522985	0.579438	0.233612		0.379599	0.636668	0.24038		0.468943	0.600701	0.216205
			0.52325	0.579704	0.234052		0.380161	0.637288	0.240833		0.469158	0.601462	0.216612
			0.523272	0.579834	0.234492		0.380267	0.638054	0.241286		0.469228	0.601546	0.21702
			0.523497	0.57989	0.234932		0.380873	0.63832	0.241738		0.46986	0.6017	0.217427
			0.524184	0.580778	0.235372		0.382006	0.640358	0.242191		0.471154	0.602968	0.217834
			0.524601	0.581338	0.235812		0.382941	0.642582	0.242644		0.472456	0.603395	0.218241
			0.52499	0.58195	0.236252		0.383331	0.645244	0.243096		0.472724	0.603646	0.218648
			0.525451	0.582271	0.236692		0.383556	0.645275	0.243549		0.472903	0.603778	0.219055
			0.52607	0.582457	0.237132		0.383926	0.646497	0.244002		0.473288	0.604004	0.219463
			0.526581	0.582712	0.237571		0.384501	0.646523	0.244455		0.474353	0.604844	0.21987
			0.527285	0.583126	0.238011		0.385197	0.64664	0.244907		0.475749	0.605374	0.220277
			0.527918	0.584045	0.238451		0.385954	0.646924	0.24536		0.47586	0.605533	0.220684
			0.52802	0.584209	0.238891		0.386103	0.647165	0.245813		0.476616	0.605565	0.221091
			0.528569	0.584429	0.239331		0.386196	0.647255	0.246265		0.476769	0.605579	0.221498
			0.528815	0.586156	0.239771		0.386575	0.649609	0.246718		0.478595	0.60638	0.221906
			0.529056	0.586238	0.240211		0.387558	0.650985	0.247171		0.478917	0.606568	0.222313
			0.529097	0.586782	0.240651		0.387957	0.651769	0.247623		0.4792	0.607542	0.22272
			0.52922	0.586809	0.241091		0.388084	0.65341	0.248076		0.479645	0.608449	0.223127
			0.530257	0.587548	0.241531		0.388165	0.653715	0.248529		0.480208	0.608628	0.223534
			0.530579	0.587685	0.241971		0.388711	0.654179	0.248981		0.480446	0.609073	0.223941
			0.530597	0.588103	0.242411		0.38886	0.656393	0.249434		0.480448	0.609174	0.224349
			0.532866	0.588435	0.242851		0.389068	0.658017	0.249887		0.480782	0.61061	0.224756
			0.533228	0.589287	0.243291		0.390022	0.658045	0.25034		0.48151	0.61077	0.225163
			0.533788	0.589516	0.243731		0.390707	0.658181	0.250792		0.482523	0.61117	0.22557
			0.534356	0.590197	0.244171		0.390829	0.658754	0.251245		0.483596	0.612179	0.225977
			0.534979	0.590211	0.244611		0.391396	0.660205	0.251698		0.483911	0.612199	0.226384
			0.535687	0.59073	0.245051		0.391662	0.661608	0.25215		0.484206	0.612602	0.226792
			0.538081	0.590828	0.245491		0.393676	0.662061	0.252603		0.484677	0.612741	0.227199
			0.539357	0.591265	0.24593		0.393757	0.662084	0.253056		0.485351	0.613518	0.227606
			0.543154	0.591419	0.24637		0.394408	0.662612	0.253508		0.487932	0.615041	0.228013
			0.546284	0.591481	0.24681		0.396823	0.662619	0.253961		0.488214	0.615246	0.22842
			0.546369	0.592286	0.24725		0.397518	0.66322	0.254414		0.488603	0.615389	0.228827
			0.546691	0.593956	0.24769		0.398777	0.66411	0.254866		0.488879	0.616051	0.229235
			0.547941	0.594837	0.24813		0.39923	0.665629	0.255319		0.490073	0.616072	0.229642
			0.547989	0.596638	0.24857		0.400543	0.667227	0.255772		0.490849	0.61616	0.230049
			0.548104	0.597265	0.24901		0.401333	0.667313	0.256225		0.491471	0.616287	0.230456
			0.550791	0.597576	0.24945		0.401781	0.667375	0.256677		0.491941	0.616326	0.230863
			0.551489	0.59786	0.24989		0.403243	0.667497	0.25713		0.493294	0.616341	0.23127
			0.552619	0.598146	0.25033		0.403575	0.668462	0.257583		0.493737	0.616604	0.231678
			0.553634	0.598394	0.25077		0.403802	0.668477	0.258035		0.496993	0.617557	0.232085
			0.555245	0.598857	0.25121		0.404042	0.669802	0.258488		0.497149	0.618774	0.232492
			0.556009	0.598864	0.25165		0.404192	0.670031	0.258941		0.497228	0.620544	0.232899
			0.55741	0.599067	0.25209		0.404242	0.672142	0.259393		0.497449	0.620807	0.233306
			0.557826	0.600659	0.25253		0.404737	0.672189	0.259846		0.498949	0.622672	0.233713
			0.557962	0.601148	0.25297		0.405565	0.672201	0.260299		0.499484	0.623102	0.234121
			0.557991	0.603475	0.25341		0.407035	0.672504	0.260751		0.499742	0.626609	0.234528
			0.558298	0.603526	0.25385		0.409009	0.673044	0.261204		0.500362	0.628096	0.234935
			0.558643	0.604035	0.254289		0.410274	0.673441	0.261657		0.501355	0.62885	0.235342
			0.558838	0.604231	0.254729		0.410924	0.673879	0.26211		0.502258	0.62921	0.235749
			0.561272	0.605889	0.255169		0.411107	0.674572	0.262562		0.504798	0.630237	0.236156
			0.561764	0.607204	0.255609		0.411939	0.67478	0.263015		0.505117	0.63068	0.236564
			0.561813	0.607902	0.256049		0.412037	0.674968	0.263468		0.505432	0.630855	0.236971
			0.562055	0.608776	0.256489		0.415353	0.676786	0.26392		0.506687	0.631166	0.237378
			0.564007	0.60954	0.256929		0.416576	0.67729	0.264373		0.506823	0.631371	0.237785
			0.564426	0.609548	0.257369		0.41723	0.677635	0.264826		0.509824	0.631462	0.238192
			0.567036	0.612365	0.257809		0.418574	0.678061	0.265278		0.510337	0.632328	0.238599
			0.567048	0.612439	0.258249		0.419443	0.678346	0.265731		0.51126	0.633243	0.239007
			0.567157	0.612619	0.258689		0.421776	0.67972	0.266184		0.511335	0.633596	0.239414
			0.568559	0.614438	0.259129		0.422293	0.680234	0.266636		0.511743	0.636635	0.239821
			0.568623	0.614532	0.259569		0.422456	0.68093	0.267089		0.511885	0.636804	0.240228
			0.568971	0.614636	0.260009		0.422539	0.681489	0.267542		0.512547	0.637307	0.240635
			0.568994	0.61556	0.260449		0.422752	0.681518	0.267995		0.512916	0.637785	0.241042
			0.569532	0.616185	0.260889		0.422914	0.681635	0.268447		0.513946	0.638027	0.24145
			0.570264	0.617485	0.261329		0.423358	0.681702	0.2689		0.515068	0.63921	0.241857
			0.572178	0.618297	0.261769		0.423575	0.682771	0.269353		0.515508	0.639646	0.242264
			0.57313	0.61831	0.262209		0.423739	0.683621	0.269805		0.517113	0.640227	0.242671
			0.573771	0.619518	0.262648		0.424741	0.684209	0.270258		0.517529	0.64026	0.243078
			0.576151	0.620316	0.263088		0.425032	0.684696	0.270711		0.518699	0.640832	0.243485
			0.5776	0.620748	0.263528		0.425605	0.685228	0.271163		0.518704	0.641982	0.243893
			0.578409	0.621642	0.263968		0.425634	0.685454	0.271616		0.521141	0.642008	0.2443
			0.579397	0.622092	0.264408		0.425852	0.686136	0.272069		0.52186	0.642314	0.244707
			0.579598	0.622993	0.264848		0.426831	0.686931	0.272522		0.524147	0.642435	0.245114
			0.579896	0.623578	0.265288		0.427203	0.687089	0.272974		0.524406	0.642649	0.245521
			0.580478	0.623722	0.265728		0.427264	0.688069	0.273427		0.525991	0.643442	0.245928
			0.581441	0.623862	0.266168		0.429119	0.688393	0.27388		0.526617	0.645604	0.246336
			0.582606	0.623863	0.266608		0.429183	0.688456	0.274332		0.526653	0.646807	0.246743
			0.584054	0.625445	0.267048		0.429314	0.689188	0.274785		0.526936	0.647069	0.24715
			0.584471	0.625762	0.267488		0.429557	0.690384	0.275238		0.527749	0.649165	0.247557
			0.584728	0.626612	0.267928		0.430248	0.692864	0.27569		0.528244	0.649633	0.247964
			0.584877	0.626644	0.268368		0.430594	0.693553	0.276143		0.528633	0.649831	0.248371
			0.587848	0.626786	0.268808		0.430688	0.694362	0.276596		0.529399	0.650191	0.248779
			0.588214	0.627075	0.269248		0.432383	0.69521	0.277048		0.52959	0.650256	0.249186
			0.588253	0.627915	0.269688		0.432471	0.695888	0.277501		0.530225	0.651959	0.249593
			0.588618	0.628557	0.270128		0.432811	0.69693	0.277954		0.530834	0.652459	0.25
			0.589929	0.629014	0.270568		0.432837	0.698169	0.278407		0.532167	0.652885	0.250407
			0.591837	0.629486	0.271007		0.432866	0.698257	0.278859		0.532462	0.653828	0.250814
			0.592358	0.63017	0.271447		0.433384	0.698452	0.279312		0.532643	0.653933	0.251221
			0.592703	0.63035	0.271887		0.434349	0.699319	0.279765		0.533292	0.654523	0.251629
			0.593405	0.630559	0.272327		0.43439	0.700498	0.280217		0.533504	0.655175	0.252036
			0.593531	0.630757	0.272767		0.434498	0.701892	0.28067		0.534236	0.656017	0.252443
			0.594688	0.631089	0.273207		0.434875	0.702771	0.281123		0.534528	0.656332	0.25285
			0.595226	0.631956	0.273647		0.435105	0.703618	0.281575		0.535942	0.656482	0.253257
			0.595861	0.632136	0.274087		0.435265	0.704591	0.282028		0.536099	0.657099	0.253664
			0.59634	0.632627	0.274527		0.43603	0.704868	0.282481		0.537667	0.658108	0.254072
			0.596431	0.63315	0.274967		0.436635	0.705526	0.282933		0.537891	0.658621	0.254479
			0.597314	0.633666	0.275407		0.437677	0.705917	0.283386		0.539152	0.658654	0.254886
			0.597431	0.635766	0.275847		0.438414	0.706708	0.283839		0.539314	0.659473	0.255293
			0.598048	0.636531	0.276287		0.438864	0.707298	0.284292		0.54101	0.659475	0.2557
			0.599786	0.637488	0.276727		0.438947	0.707779	0.284744		0.541147	0.659612	0.256107
			0.599974	0.637551	0.277167		0.439172	0.708452	0.285197		0.542989	0.659774	0.256515
			0.60352	0.638718	0.277607		0.440631	0.708456	0.28565		0.544199	0.662472	0.256922
			0.604332	0.639531	0.278047		0.440872	0.709923	0.286102		0.544406	0.663033	0.257329
			0.60451	0.640168	0.278487		0.440939	0.710201	0.286555		0.54466	0.664274	0.257736
			0.606102	0.640916	0.278927		0.441776	0.711354	0.287008		0.545331	0.665961	0.258143
			0.606129	0.64094	0.279366		0.442124	0.71207	0.28746		0.545389	0.666035	0.25855
			0.60621	0.641149	0.279806		0.442305	0.712708	0.287913		0.545918	0.667495	0.258958
			0.607447	0.641985	0.280246		0.442453	0.714305	0.288366		0.546556	0.667903	0.259365
			0.607981	0.642022	0.280686		0.442714	0.716054	0.288818		0.54711	0.668087	0.259772
			0.610014	0.642256	0.281126		0.443404	0.716431	0.289271		0.547815	0.668996	0.260179
			0.610097	0.642777	0.281566		0.444126	0.716602	0.289724		0.548055	0.669924	0.260586
			0.611508	0.64358	0.282006		0.44433	0.716634	0.290177		0.549266	0.670297	0.260993
			0.612477	0.644591	0.282446		0.444809	0.716898	0.290629		0.551148	0.670742	0.261401
			0.612512	0.645671	0.282886		0.444876	0.716945	0.291082		0.552189	0.671289	0.261808
			0.612585	0.645738	0.283326		0.445222	0.717671	0.291535		0.552247	0.672041	0.262215
			0.612635	0.645796	0.283766		0.446148	0.71856	0.291987		0.5526	0.672994	0.262622
			0.613891	0.646542	0.284206		0.446539	0.719121	0.29244		0.552716	0.675728	0.263029
			0.614841	0.647298	0.284646		0.447255	0.719276	0.292893		0.553427	0.675917	0.263436
			0.615196	0.647384	0.285086		0.447353	0.721462	0.293345		0.553948	0.676373	0.263844
			0.61586	0.647722	0.285526		0.447502	0.72178	0.293798		0.554386	0.676388	0.264251
			0.62163	0.648267	0.285966		0.447935	0.721895	0.294251		0.55472	0.677071	0.264658
			0.622374	0.648554	0.286406		0.449013	0.721957	0.294703		0.555609	0.677187	0.265065
			0.622454	0.648892	0.286846		0.44939	0.722779	0.295156		0.555799	0.677352	0.265472
			0.622837	0.649545	0.287286		0.449507	0.722784	0.295609		0.55687	0.677935	0.265879
			0.624382	0.651412	0.287725		0.449632	0.722977	0.296062		0.558738	0.678184	0.266287
			0.62462	0.652217	0.288165		0.450206	0.72449	0.296514		0.559374	0.678648	0.266694
			0.626358	0.653818	0.288605		0.450478	0.7248	0.296967		0.560984	0.678719	0.267101
			0.626974	0.654288	0.289045		0.451673	0.726218	0.29742		0.561158	0.678898	0.267508
			0.627903	0.654667	0.289485		0.451935	0.727707	0.297872		0.561781	0.679738	0.267915
			0.62803	0.654823	0.289925		0.451987	0.730585	0.298325		0.564198	0.679957	0.268322
			0.629549	0.655118	0.290365		0.452388	0.730637	0.298778		0.564604	0.680118	0.26873
			0.630824	0.656485	0.290805		0.452486	0.731106	0.29923		0.565066	0.68022	0.269137
			0.631057	0.656786	0.291245		0.452837	0.732053	0.299683		0.565717	0.680504	0.269544
			0.632396	0.657966	0.291685		0.452949	0.732789	0.300136		0.565755	0.681598	0.269951
			0.63276	0.659273	0.292125		0.453453	0.732927	0.300589		0.566186	0.682571	0.270358
			0.632914	0.659372	0.292565		0.453577	0.733973	0.301041		0.566359	0.682603	0.270765
			0.633057	0.659486	0.293005		0.453815	0.733993	0.301494		0.567838	0.683459	0.271173
			0.6337	0.65991	0.293445		0.454413	0.734379	0.301947		0.568774	0.68454	0.27158
			0.636142	0.659991	0.293885		0.454543	0.734663	0.302399		0.568926	0.684788	0.271987
			0.638204	0.6603	0.294325		0.454605	0.734673	0.302852		0.570611	0.685833	0.272394
			0.638629	0.661369	0.294765		0.454979	0.73572	0.303305		0.572048	0.686305	0.272801
			0.638922	0.661795	0.295205		0.455219	0.735926	0.303757		0.574312	0.688495	0.273208
			0.639006	0.663368	0.295645		0.455283	0.736458	0.30421		0.575611	0.689062	0.273616
			0.64041	0.663827	0.296084		0.456122	0.736739	0.304663		0.576285	0.689369	0.274023
			0.640808	0.664164	0.296524		0.457239	0.737517	0.305115		0.576952	0.690165	0.27443
			0.641824	0.664495	0.296964		0.458004	0.738258	0.305568		0.57712	0.690426	0.274837
			0.641884	0.664702	0.297404		0.458412	0.739098	0.306021		0.578316	0.690461	0.275244
			0.642555	0.665158	0.297844		0.460345	0.739109	0.306474		0.579883	0.690689	0.275651
			0.643953	0.665376	0.298284		0.460815	0.740553	0.306926		0.581301	0.691166	0.276059
			0.644394	0.665884	0.298724		0.461077	0.741956	0.307379		0.581363	0.691414	0.276466
			0.644465	0.666944	0.299164		0.461196	0.742363	0.307832		0.581949	0.692416	0.276873
			0.644817	0.668435	0.299604		0.462054	0.742572	0.308284		0.58266	0.693438	0.27728
			0.644998	0.668444	0.300044		0.462614	0.74369	0.308737		0.582917	0.6935	0.277687
			0.645381	0.668525	0.300484		0.463191	0.745851	0.30919		0.583077	0.693505	0.278094
			0.646353	0.668876	0.300924		0.464955	0.745868	0.309642		0.58309	0.694796	0.278502
			0.647674	0.669742	0.301364		0.466177	0.74632	0.310095		0.583198	0.695024	0.278909
			0.649166	0.67002	0.301804		0.466657	0.746768	0.310548		0.583705	0.695309	0.279316
			0.650688	0.670396	0.302244		0.466848	0.747255	0.311		0.583978	0.695588	0.279723
			0.651153	0.672688	0.302684		0.466908	0.747545	0.311453		0.584108	0.697165	0.28013
			0.6512	0.673135	0.303124		0.467207	0.74811	0.311906		0.585063	0.698019	0.280537
			0.651699	0.673299	0.303564		0.467327	0.748942	0.312359		0.585759	0.698579	0.280945
			0.651777	0.673333	0.304004		0.469837	0.750426	0.312811		0.586572	0.701014	0.281352
			0.652647	0.673505	0.304443		0.471092	0.750436	0.313264		0.586854	0.701776	0.281759
			0.65323	0.673874	0.304883		0.47309	0.750686	0.313717		0.587684	0.703458	0.282166
			0.654609	0.673894	0.305323		0.474163	0.752401	0.314169		0.588139	0.703679	0.282573
			0.655031	0.67456	0.305763		0.474644	0.753109	0.314622		0.589175	0.703764	0.28298
			0.655744	0.675651	0.306203		0.474878	0.753154	0.315075		0.589359	0.704473	0.283388
			0.656137	0.676167	0.306643		0.474896	0.75343	0.315527		0.589497	0.705246	0.283795
			0.656563	0.676369	0.307083		0.475908	0.754573	0.31598		0.591166	0.70554	0.284202
			0.656694	0.677402	0.307523		0.477421	0.756299	0.316433		0.59211	0.707203	0.284609
			0.656997	0.678337	0.307963		0.477537	0.757087	0.316885		0.592767	0.708522	0.285016
			0.657367	0.678414	0.308403		0.477724	0.757258	0.317338		0.59322	0.709545	0.285423
			0.657841	0.678833	0.308843		0.478132	0.757322	0.317791		0.593408	0.710352	0.285831
			0.658174	0.678982	0.309283		0.478887	0.757605	0.318244		0.594389	0.710519	0.286238
			0.658732	0.67907	0.309723		0.47908	0.757644	0.318696		0.595689	0.710644	0.286645
			0.659059	0.679436	0.310163		0.480099	0.758448	0.319149		0.596177	0.710874	0.287052
			0.660861	0.680722	0.310603		0.480159	0.759448	0.319602		0.596903	0.710883	0.287459
			0.661198	0.680872	0.311043		0.480392	0.759526	0.320054		0.598112	0.711771	0.287866
			0.661596	0.680942	0.311483		0.480932	0.759947	0.320507		0.598267	0.713426	0.288274
			0.661762	0.683109	0.311923		0.481126	0.760604	0.32096		0.598321	0.714021	0.288681
			0.661904	0.683252	0.312363		0.481289	0.761154	0.321412		0.598331	0.714304	0.289088
			0.662211	0.683344	0.312802		0.481683	0.761344	0.321865		0.598609	0.719858	0.289495
			0.662702	0.683638	0.313242		0.481814	0.761891	0.322318		0.59908	0.720776	0.289902
			0.663381	0.684049	0.313682		0.482321	0.764302	0.32277		0.599276	0.721368	0.290309
			0.663748	0.684521	0.314122		0.484165	0.764621	0.323223		0.601039	0.723051	0.290717
			0.665318	0.685575	0.314562		0.484482	0.766556	0.323676		0.602076	0.723694	0.291124
			0.665652	0.685641	0.315002		0.484549	0.766603	0.324129		0.602773	0.724412	0.291531
			0.66745	0.685699	0.315442		0.484641	0.768865	0.324581		0.60309	0.726346	0.291938
			0.667807	0.685778	0.315882		0.485061	0.769201	0.325034		0.603242	0.726924	0.292345
			0.667933	0.685881	0.316322		0.485328	0.769353	0.325487		0.603569	0.72767	0.292752
			0.668591	0.686285	0.316762		0.485834	0.770785	0.325939		0.604141	0.728173	0.29316
			0.668616	0.686457	0.317202		0.486082	0.772235	0.326392		0.604362	0.729052	0.293567
			0.670674	0.686756	0.317642		0.48611	0.772467	0.326845		0.60438	0.729999	0.293974
			0.671487	0.687467	0.318082		0.487405	0.772983	0.327297		0.60502	0.730071	0.294381
			0.675416	0.687887	0.318522		0.487842	0.77643	0.32775		0.60711	0.730308	0.294788
			0.675638	0.688609	0.318962		0.489061	0.776749	0.328203		0.607193	0.730321	0.295195
			0.675792	0.689365	0.319402		0.489539	0.778174	0.328656		0.608976	0.73091	0.295603
			0.67607	0.691855	0.319842		0.49015	0.780037	0.329108		0.609386	0.731089	0.29601
			0.676466	0.694129	0.320282		0.491127	0.781165	0.329561		0.609414	0.731494	0.296417
			0.677685	0.694998	0.320722		0.492002	0.782588	0.330014		0.609901	0.734601	0.296824
			0.679348	0.695371	0.321161		0.492032	0.782987	0.330466		0.610014	0.735085	0.297231
			0.68004	0.696228	0.321601		0.493063	0.784262	0.330919		0.610069	0.735174	0.297638
			0.680232	0.699045	0.322041		0.493779	0.784745	0.331372		0.610075	0.736413	0.298046
			0.680916	0.699793	0.322481		0.494065	0.784897	0.331824		0.610964	0.736951	0.298453
			0.681562	0.701487	0.322921		0.494225	0.785252	0.332277		0.612704	0.737307	0.29886
			0.683338	0.701689	0.323361		0.49437	0.785512	0.33273		0.613124	0.737694	0.299267
			0.683518	0.701858	0.323801		0.49511	0.785582	0.333182		0.613286	0.737701	0.299674
			0.684039	0.701941	0.324241		0.496291	0.7867	0.333635		0.613469	0.738109	0.300081
			0.684255	0.702498	0.324681		0.496452	0.788956	0.334088		0.615216	0.738809	0.300489
			0.684558	0.702607	0.325121		0.497215	0.789259	0.334541		0.616892	0.738814	0.300896
			0.684802	0.702908	0.325561		0.497326	0.790312	0.334993		0.61791	0.73929	0.301303
			0.685182	0.703555	0.326001		0.498137	0.791429	0.335446		0.619629	0.739444	0.30171
			0.685471	0.70547	0.326441		0.498193	0.791615	0.335899		0.620066	0.739926	0.302117
			0.686117	0.705596	0.326881		0.498271	0.792831	0.336351		0.621413	0.741173	0.302524
			0.686254	0.706207	0.327321		0.499089	0.793165	0.336804		0.621426	0.742061	0.302932
			0.686771	0.706498	0.327761		0.499485	0.793458	0.337257		0.621498	0.743316	0.303339
			0.687398	0.707354	0.328201		0.499668	0.795139	0.337709		0.62222	0.743358	0.303746
			0.688054	0.708447	0.328641		0.500618	0.795371	0.338162		0.622513	0.743503	0.304153
			0.688917	0.708647	0.329081		0.50152	0.795385	0.338615		0.622574	0.743693	0.30456
			0.690386	0.709191	0.32952		0.501905	0.795386	0.339067		0.624218	0.743721	0.304967
			0.691063	0.709226	0.32996		0.50203	0.79579	0.33952		0.624805	0.743846	0.305375
			0.69233	0.711306	0.3304		0.502108	0.796367	0.339973		0.625148	0.745393	0.305782
			0.692765	0.711341	0.33084		0.502354	0.797059	0.340426		0.625991	0.747009	0.306189
			0.692765	0.711464	0.33128		0.502411	0.797175	0.340878		0.626728	0.749146	0.306596
			0.69339	0.711675	0.33172		0.502949	0.79724	0.341331		0.627621	0.749899	0.307003
			0.693648	0.712598	0.33216		0.504652	0.798249	0.341784		0.627831	0.750044	0.30741
			0.694596	0.713458	0.3326		0.504656	0.798443	0.342236		0.627861	0.750416	0.307818
			0.694916	0.713999	0.33304		0.505338	0.800749	0.342689		0.62858	0.750532	0.308225
			0.696356	0.715745	0.33348		0.505794	0.800887	0.343142		0.629929	0.750567	0.308632
			0.697428	0.716092	0.33392		0.506363	0.801194	0.343594		0.630004	0.75072	0.309039
			0.697574	0.718349	0.33436		0.506556	0.801961	0.344047		0.631154	0.750804	0.309446
			0.698475	0.718354	0.3348		0.507383	0.80199	0.3445		0.632051	0.751325	0.309853
			0.701452	0.719445	0.33524		0.50892	0.802457	0.344952		0.633044	0.752116	0.310261
			0.702397	0.719463	0.33568		0.508967	0.803885	0.345405		0.633464	0.753086	0.310668
			0.702564	0.71995	0.33612		0.509208	0.804492	0.345858		0.635182	0.753571	0.311075
			0.703058	0.722173	0.33656		0.509317	0.805147	0.346311		0.636353	0.754821	0.311482
			0.704513	0.722647	0.337		0.509677	0.805559	0.346763		0.637563	0.755356	0.311889
			0.704741	0.72279	0.33744		0.512209	0.806656	0.347216		0.637606	0.755569	0.312296
			0.704993	0.723738	0.337879		0.51245	0.806798	0.347669		0.639141	0.756213	0.312704
			0.705067	0.724344	0.338319		0.512985	0.807751	0.348121		0.640438	0.756726	0.313111
			0.705451	0.725356	0.338759		0.514873	0.80909	0.348574		0.640961	0.757626	0.313518
			0.705513	0.725925	0.339199		0.515057	0.809232	0.349027		0.641545	0.758488	0.313925
			0.705801	0.726012	0.339639		0.515149	0.815443	0.349479		0.642501	0.758862	0.314332
			0.706639	0.726154	0.340079		0.515193	0.815867	0.349932		0.644164	0.758951	0.314739
			0.707257	0.726292	0.340519		0.51563	0.815893	0.350385		0.6456	0.759805	0.315147
			0.70729	0.726885	0.340959		0.516475	0.816386	0.350837		0.646877	0.759977	0.315554
			0.70753	0.727736	0.341399		0.516992	0.816803	0.35129		0.648681	0.760504	0.315961
			0.707698	0.727911	0.341839		0.517001	0.817588	0.351743		0.649438	0.760897	0.316368
			0.708439	0.729206	0.342279		0.517055	0.817745	0.352196		0.65003	0.761118	0.316775
			0.709801	0.729809	0.342719		0.517739	0.818907	0.352648		0.650297	0.762383	0.317182
			0.709999	0.730031	0.343159		0.518228	0.819887	0.353101		0.650467	0.762628	0.31759
			0.71192	0.730176	0.343599		0.518856	0.820714	0.353554		0.65053	0.76267	0.317997
			0.712193	0.730303	0.344039		0.519864	0.822495	0.354006		0.651091	0.763886	0.318404
			0.712566	0.730587	0.344479		0.52029	0.822832	0.354459		0.651498	0.76579	0.318811
			0.713466	0.7317	0.344919		0.520688	0.823885	0.354912		0.651879	0.766257	0.319218
			0.713596	0.731747	0.345359		0.520724	0.824224	0.355364		0.652135	0.767124	0.319625
			0.714003	0.732293	0.345799		0.521524	0.824916	0.355817		0.653286	0.768499	0.320033
			0.714461	0.732489	0.346238		0.521603	0.825193	0.35627		0.65424	0.768709	0.32044
			0.714496	0.732687	0.346678		0.521703	0.825566	0.356722		0.655214	0.768819	0.320847
			0.715475	0.734103	0.347118		0.521786	0.82568	0.357175		0.655321	0.769467	0.321254
			0.715593	0.735657	0.347558		0.523552	0.826632	0.357628		0.656472	0.769686	0.321661
			0.716101	0.736458	0.347998		0.524104	0.827091	0.358081		0.656664	0.770094	0.322068
			0.716804	0.73682	0.348438		0.525714	0.827207	0.358533		0.656694	0.772818	0.322476
			0.71813	0.737202	0.348878		0.525899	0.827387	0.358986		0.657857	0.774436	0.322883
			0.7185	0.737289	0.349318		0.526791	0.827722	0.359439		0.660083	0.77461	0.32329
			0.718828	0.737549	0.349758		0.526998	0.827864	0.359891		0.660277	0.77506	0.323697
			0.719704	0.738368	0.350198		0.527167	0.828347	0.360344		0.660568	0.775586	0.324104
			0.721034	0.739364	0.350638		0.528418	0.828452	0.360797		0.660969	0.7756	0.324511
			0.722231	0.7399	0.351078		0.52866	0.829329	0.361249		0.661344	0.777731	0.324919
			0.722912	0.740339	0.351518		0.528963	0.83012	0.361702		0.661968	0.777952	0.325326
			0.72427	0.74156	0.351958		0.529104	0.83082	0.362155		0.664504	0.778262	0.325733
			0.724301	0.741585	0.352398		0.529699	0.832268	0.362608		0.664938	0.778705	0.32614
			0.726135	0.741661	0.352838		0.530465	0.832331	0.36306		0.666097	0.779331	0.326547
			0.726364	0.741819	0.353278		0.532178	0.832752	0.363513		0.666264	0.780092	0.326954
			0.726817	0.742832	0.353718		0.532827	0.835387	0.363966		0.666479	0.7801	0.327362
			0.728945	0.743671	0.354158		0.533296	0.836574	0.364418		0.667731	0.7813	0.327769
			0.729146	0.743836	0.354597		0.533622	0.837573	0.364871		0.668821	0.782392	0.328176
			0.72917	0.744366	0.355037		0.533692	0.840333	0.365324		0.668835	0.783095	0.328583
			0.729441	0.745275	0.355477		0.534746	0.840666	0.365776		0.669976	0.784117	0.32899
			0.731853	0.746078	0.355917		0.534899	0.842723	0.366229		0.671317	0.784717	0.329397
			0.731884	0.747792	0.356357		0.534983	0.843792	0.366682		0.672268	0.785779	0.329805
			0.733661	0.748879	0.356797		0.535598	0.84425	0.367134		0.672342	0.786078	0.330212
			0.734694	0.749663	0.357237		0.535725	0.846436	0.367587		0.673108	0.786204	0.330619
			0.735681	0.750213	0.357677		0.536603	0.847052	0.36804		0.673238	0.786852	0.331026
			0.73571	0.750757	0.358117		0.53756	0.84711	0.368493		0.673717	0.787968	0.331433
			0.739629	0.751261	0.358557		0.537598	0.847599	0.368945		0.676394	0.789105	0.33184
			0.739669	0.753948	0.358997		0.538071	0.847853	0.369398		0.676709	0.789418	0.332248
			0.73979	0.754036	0.359437		0.538355	0.848201	0.369851		0.677768	0.789648	0.332655
			0.740171	0.754465	0.359877		0.539916	0.849005	0.370303		0.678142	0.789987	0.333062
			0.740528	0.754953	0.360317		0.540164	0.849506	0.370756		0.678492	0.790068	0.333469
			0.741864	0.755187	0.360757		0.540231	0.849815	0.371209		0.67993	0.790843	0.333876
			0.745539	0.755241	0.361197		0.541061	0.850345	0.371661		0.680094	0.791143	0.334283
			0.747816	0.755618	0.361637		0.541531	0.851854	0.372114		0.683025	0.791892	0.334691
			0.748789	0.756465	0.362077		0.54189	0.852865	0.372567		0.683174	0.792952	0.335098
			0.749139	0.756496	0.362516		0.541939	0.853387	0.373019		0.683869	0.795085	0.335505
			0.749362	0.757265	0.362956		0.542163	0.853783	0.373472		0.683944	0.795461	0.335912
			0.749371	0.757814	0.363396		0.542329	0.853973	0.373925		0.684526	0.795779	0.336319
			0.749631	0.76111	0.363836		0.542348	0.854753	0.374378		0.685015	0.796199	0.336726
			0.74988	0.76153	0.364276		0.542416	0.855072	0.37483		0.68619	0.796638	0.337134
			0.750206	0.762894	0.364716		0.543216	0.855235	0.375283		0.686674	0.797705	0.337541
			0.750244	0.763424	0.365156		0.543948	0.856055	0.375736		0.687034	0.798007	0.337948
			0.751365	0.764616	0.365596		0.544125	0.856684	0.376188		0.687217	0.79827	0.338355
			0.752757	0.764704	0.366036		0.54491	0.857797	0.376641		0.687479	0.799767	0.338762
			0.753114	0.764853	0.366476		0.54549	0.859212	0.377094		0.688762	0.799886	0.339169
			0.754881	0.764918	0.366916		0.545695	0.859632	0.377546		0.689537	0.800202	0.339577
			0.755248	0.7653	0.367356		0.545905	0.86013	0.377999		0.689628	0.800334	0.339984
			0.757449	0.765587	0.367796		0.547546	0.86033	0.378452		0.689899	0.801168	0.340391
			0.759715	0.765872	0.368236		0.547872	0.861687	0.378904		0.690284	0.802798	0.340798
			0.760368	0.766333	0.368676		0.548636	0.862551	0.379357		0.690496	0.803624	0.341205
			0.760674	0.766808	0.369116		0.549323	0.86348	0.37981		0.693266	0.803927	0.341612
			0.761133	0.76722	0.369556		0.549651	0.866708	0.380263		0.694719	0.804715	0.34202
			0.761379	0.768326	0.369996		0.550879	0.86673	0.380715		0.695418	0.807347	0.342427
			0.761806	0.770174	0.370436		0.551999	0.867036	0.381168		0.695537	0.807375	0.342834
			0.761987	0.770302	0.370875		0.552888	0.867427	0.381621		0.695585	0.808652	0.343241
			0.762504	0.770457	0.371315		0.553562	0.868149	0.382073		0.695979	0.809487	0.343648
			0.762935	0.77077	0.371755		0.553799	0.868345	0.382526		0.698143	0.811736	0.344055
			0.763316	0.770914	0.372195		0.556203	0.868665	0.382979		0.698197	0.813194	0.344463
			0.765712	0.771141	0.372635		0.556255	0.868976	0.383431		0.698255	0.813323	0.34487
			0.766024	0.771645	0.373075		0.556864	0.869047	0.383884		0.699801	0.813756	0.345277
			0.76603	0.771964	0.373515		0.557194	0.869469	0.384337		0.700057	0.814429	0.345684
			0.766947	0.772033	0.373955		0.557412	0.870385	0.384789		0.700442	0.815021	0.346091
			0.768785	0.77249	0.374395		0.558984	0.870675	0.385242		0.701306	0.815656	0.346498
			0.769166	0.772797	0.374835		0.559402	0.872034	0.385695		0.702225	0.815978	0.346906
			0.769188	0.772977	0.375275		0.560574	0.872135	0.386148		0.702289	0.816013	0.347313
			0.769308	0.773716	0.375715		0.560606	0.872234	0.3866		0.702918	0.816641	0.34772
			0.770701	0.773889	0.376155		0.561104	0.87248	0.387053		0.703014	0.817102	0.348127
			0.771105	0.774906	0.376595		0.561309	0.873841	0.387506		0.703958	0.8179	0.348534
			0.771847	0.775299	0.377035		0.561712	0.874943	0.387958		0.705095	0.818162	0.348941
			0.773065	0.775352	0.377475		0.562206	0.875306	0.388411		0.70571	0.818229	0.349349
			0.774194	0.776537	0.377915		0.562578	0.876602	0.388864		0.706134	0.820526	0.349756
			0.77425	0.777057	0.378355		0.562591	0.877132	0.389316		0.707029	0.821429	0.350163
			0.776773	0.777099	0.378795		0.562899	0.877448	0.389769		0.707425	0.821979	0.35057
			0.777347	0.777822	0.379234		0.563369	0.878244	0.390222		0.707602	0.822845	0.350977
			0.779118	0.778229	0.379674		0.563697	0.878247	0.390675		0.708609	0.82714	0.351384
			0.780177	0.778928	0.380114		0.564233	0.878392	0.391127		0.708688	0.827898	0.351792
			0.78203	0.77908	0.380554		0.564247	0.878501	0.39158		0.709155	0.82816	0.352199
			0.782479	0.779272	0.380994		0.56479	0.878597	0.392033		0.709339	0.828825	0.352606
			0.783446	0.780079	0.381434		0.565897	0.879455	0.392485		0.710497	0.828951	0.353013
			0.78347	0.780424	0.381874		0.566161	0.880018	0.392938		0.710758	0.829927	0.35342
			0.785508	0.780641	0.382314		0.566307	0.880076	0.393391		0.710763	0.830161	0.353827
			0.785522	0.781442	0.382754		0.56685	0.880965	0.393843		0.71092	0.830961	0.354235
			0.785638	0.782521	0.383194		0.567505	0.881465	0.394296		0.711557	0.831772	0.354642
			0.787371	0.782882	0.383634		0.567592	0.881645	0.394749		0.711776	0.831993	0.355049
			0.787627	0.783067	0.384074		0.567917	0.881717	0.395201		0.712993	0.832584	0.355456
			0.787748	0.783077	0.384514		0.568406	0.882189	0.395654		0.713153	0.83311	0.355863
			0.790172	0.784753	0.384954		0.568411	0.88223	0.396107		0.713699	0.833638	0.35627
			0.790172	0.785818	0.385394		0.568415	0.882686	0.39656		0.714149	0.83397	0.356678
			0.792374	0.786064	0.385834		0.569249	0.882694	0.397012		0.714179	0.834564	0.357085
			0.792633	0.786388	0.386274		0.569366	0.883023	0.397465		0.71423	0.834949	0.357492
			0.794326	0.786804	0.386714		0.570327	0.883058	0.397918		0.714604	0.836169	0.357899
			0.794848	0.786973	0.387154		0.570756	0.884897	0.39837		0.715787	0.836518	0.358306
			0.795407	0.787467	0.387593		0.571428	0.885473	0.398823		0.715837	0.836867	0.358713
			0.798758	0.787736	0.388033		0.571526	0.887291	0.399276		0.717364	0.836868	0.359121
			0.800083	0.789744	0.388473		0.572417	0.888122	0.399728		0.717947	0.83694	0.359528
			0.800193	0.791031	0.388913		0.572501	0.890115	0.400181		0.718637	0.838162	0.359935
			0.801503	0.791264	0.389353		0.572512	0.890889	0.400634		0.720552	0.838963	0.360342
			0.801908	0.793388	0.389793		0.573147	0.891338	0.401086		0.720754	0.840045	0.360749
			0.802914	0.793486	0.390233		0.573177	0.891599	0.401539		0.721086	0.84049	0.361156
			0.803095	0.795143	0.390673		0.573789	0.891683	0.401992		0.721543	0.840631	0.361564
			0.803308	0.795455	0.391113		0.57428	0.892274	0.402445		0.722263	0.84085	0.361971
			0.803398	0.795809	0.391553		0.575685	0.892693	0.402897		0.722533	0.840965	0.362378
			0.804089	0.796121	0.391993		0.576266	0.89378	0.40335		0.722803	0.841222	0.362785
			0.804208	0.796189	0.392433		0.576928	0.894032	0.403803		0.723821	0.841879	0.363192
			0.804397	0.798099	0.392873		0.579975	0.895141	0.404255		0.723968	0.842038	0.363599
			0.804704	0.798535	0.393313		0.579986	0.896995	0.404708		0.72426	0.842599	0.364007
			0.804735	0.799587	0.393753		0.580591	0.898225	0.405161		0.724455	0.843541	0.364414
			0.80608	0.799675	0.394193		0.580994	0.898956	0.405613		0.724625	0.844036	0.364821
			0.806159	0.80024	0.394633		0.581409	0.89959	0.406066		0.724733	0.844425	0.365228
			0.807583	0.801633	0.395073		0.581778	0.901732	0.406519		0.725109	0.84463	0.365635
			0.807871	0.801863	0.395513		0.581843	0.903268	0.406971		0.725342	0.844795	0.366042
			0.808026	0.802453	0.395952		0.581909	0.904841	0.407424		0.725946	0.844822	0.36645
			0.809225	0.80342	0.396392		0.582285	0.906506	0.407877		0.726448	0.845281	0.366857
			0.812433	0.803579	0.396832		0.583347	0.906551	0.40833		0.726682	0.845914	0.367264
			0.813456	0.805706	0.397272		0.585842	0.906938	0.408782		0.727166	0.846192	0.367671
			0.815367	0.805885	0.397712		0.585942	0.908676	0.409235		0.72739	0.846441	0.368078
			0.815621	0.806118	0.398152		0.586275	0.910569	0.409688		0.728222	0.846508	0.368485
			0.815693	0.806673	0.398592		0.587054	0.911251	0.41014		0.730092	0.846911	0.368893
			0.815806	0.807148	0.399032		0.587135	0.911662	0.410593		0.731409	0.847094	0.3693
			0.816148	0.807304	0.399472		0.587264	0.911815	0.411046		0.731505	0.847665	0.369707
			0.816197	0.808106	0.399912		0.587667	0.916763	0.411498		0.731707	0.848302	0.370114
			0.816326	0.808841	0.400352		0.588785	0.916919	0.411951		0.732221	0.848595	0.370521
			0.817493	0.809186	0.400792		0.590012	0.916979	0.412404		0.732355	0.849285	0.370928
			0.817609	0.80934	0.401232		0.590335	0.917178	0.412856		0.73375	0.849419	0.371336
			0.818025	0.809922	0.401672		0.590981	0.917477	0.413309		0.734315	0.849432	0.371743
			0.818161	0.810518	0.402112		0.591092	0.91785	0.413762		0.734349	0.849951	0.37215
			0.819073	0.810924	0.402552		0.592127	0.919225	0.414215		0.734598	0.850636	0.372557
			0.819211	0.810999	0.402992		0.592331	0.920289	0.414667		0.734614	0.850777	0.372964
			0.819246	0.81195	0.403432		0.593006	0.9237	0.41512		0.735388	0.851046	0.373371
			0.819292	0.81346	0.403872		0.593545	0.924474	0.415573		0.736181	0.852019	0.373779
			0.82059	0.814664	0.404311		0.594029	0.925578	0.416025		0.737077	0.852157	0.374186
			0.822202	0.815392	0.404751		0.594086	0.925772	0.416478		0.737555	0.852862	0.374593
			0.82432	0.816552	0.405191		0.594687	0.926021	0.416931		0.737647	0.852953	0.375
			0.825101	0.817494	0.405631		0.594862	0.926875	0.417383		0.737879	0.852985	0.375407
			0.825553	0.818136	0.406071		0.595282	0.929008	0.417836		0.738778	0.854873	0.375814
			0.826262	0.818988	0.406511		0.597013	0.930202	0.418289		0.740061	0.8553	0.376221
			0.826356	0.820285	0.406951		0.597523	0.930203	0.418742		0.741723	0.855577	0.376629
			0.826759	0.820976	0.407391		0.597658	0.931278	0.419194		0.74198	0.856226	0.377036
			0.830127	0.823818	0.407831		0.597901	0.931351	0.419647		0.742459	0.856766	0.377443
			0.830338	0.824273	0.408271		0.597938	0.931635	0.4201		0.74324	0.858608	0.37785
			0.832091	0.824363	0.408711		0.59816	0.932041	0.420552		0.743543	0.859807	0.378257
			0.833283	0.824684	0.409151		0.599006	0.933406	0.421005		0.745186	0.859997	0.378664
			0.833748	0.825569	0.409591		0.599461	0.933599	0.421458		0.745435	0.860019	0.379072
			0.833829	0.826877	0.410031		0.599983	0.934362	0.42191		0.74583	0.860245	0.379479
			0.836748	0.827344	0.410471		0.600094	0.934827	0.422363		0.746698	0.860428	0.379886
			0.836964	0.830051	0.410911		0.60013	0.935056	0.422816		0.747024	0.861646	0.380293
			0.837257	0.83085	0.411351		0.601126	0.935667	0.423268		0.748806	0.862478	0.3807
			0.838518	0.831234	0.411791		0.602296	0.937061	0.423721		0.749005	0.863023	0.381107
			0.838603	0.831406	0.412231		0.602952	0.937423	0.424174		0.749437	0.863126	0.381515
			0.838945	0.832809	0.41267		0.604019	0.938187	0.424627		0.750941	0.863174	0.381922
			0.840358	0.833211	0.41311		0.605232	0.938979	0.425079		0.751491	0.863519	0.382329
			0.841001	0.833247	0.41355		0.605279	0.939846	0.425532		0.752096	0.863687	0.382736
			0.841108	0.833307	0.41399		0.60555	0.9401	0.425985		0.752107	0.863744	0.383143
			0.841333	0.833308	0.41443		0.606975	0.940484	0.426437		0.753109	0.86405	0.38355
			0.841377	0.833953	0.41487		0.607531	0.941354	0.42689		0.753561	0.864056	0.383958
			0.842544	0.834764	0.41531		0.608514	0.941633	0.427343		0.753639	0.864795	0.384365
			0.84283	0.834959	0.41575		0.609944	0.941946	0.427795		0.753828	0.865746	0.384772
			0.843268	0.835327	0.41619		0.612181	0.941961	0.428248		0.755554	0.866577	0.385179
			0.843378	0.837999	0.41663		0.612353	0.942315	0.428701		0.75639	0.86689	0.385586
			0.844295	0.838538	0.41707		0.612425	0.943589	0.429153		0.756958	0.867331	0.385993
			0.845963	0.839263	0.41751		0.612787	0.943837	0.429606		0.757043	0.868061	0.386401
			0.846032	0.839828	0.41795		0.612807	0.945195	0.430059		0.757856	0.868693	0.386808
			0.846415	0.8404	0.41839		0.61324	0.94639	0.430512		0.758013	0.869768	0.387215
			0.846782	0.840407	0.41883		0.613422	0.946426	0.430964		0.75808	0.870684	0.387622
			0.846908	0.841027	0.41927		0.615054	0.946443	0.431417		0.758336	0.873003	0.388029
			0.84762	0.841482	0.41971		0.615375	0.948062	0.43187		0.758883	0.875217	0.388436
			0.847851	0.842174	0.42015		0.616063	0.949655	0.432322		0.760774	0.875827	0.388844
			0.848263	0.842883	0.42059		0.616199	0.949686	0.432775		0.760796	0.877097	0.389251
			0.848533	0.843724	0.421029		0.616402	0.950088	0.433228		0.762659	0.877839	0.389658
			0.849446	0.845008	0.421469		0.616757	0.950831	0.43368		0.763579	0.878921	0.390065
			0.849842	0.846601	0.421909		0.617017	0.951309	0.434133		0.764218	0.880129	0.390472
			0.850692	0.846937	0.422349		0.617326	0.951955	0.434586		0.764522	0.88224	0.390879
			0.851838	0.847452	0.422789		0.617632	0.952918	0.435038		0.766844	0.883258	0.391287
			0.852341	0.849165	0.423229		0.617708	0.953409	0.435491		0.767488	0.883753	0.391694
			0.854443	0.850729	0.423669		0.618187	0.953443	0.435944		0.767844	0.884204	0.392101
			0.855161	0.851899	0.424109		0.618339	0.95442	0.436397		0.768149	0.885167	0.392508
			0.856092	0.852063	0.424549		0.619042	0.955015	0.436849		0.768495	0.885537	0.392915
			0.856165	0.852807	0.424989		0.619302	0.955514	0.437302		0.769908	0.885776	0.393322
			0.857628	0.854465	0.425429		0.620095	0.957642	0.437755		0.770174	0.886507	0.39373
			0.858134	0.854868	0.425869		0.620502	0.957729	0.438207		0.770654	0.88765	0.394137
			0.859936	0.855878	0.426309		0.620594	0.958577	0.43866		0.770986	0.889185	0.394544
			0.861912	0.85717	0.426749		0.621112	0.958745	0.439113		0.771099	0.890251	0.394951
			0.864547	0.857412	0.427189		0.621124	0.959432	0.439565		0.771613	0.891563	0.395358
			0.865281	0.860585	0.427629		0.621646	0.960277	0.440018		0.772176	0.891725	0.395765
			0.865928	0.862838	0.428069		0.622497	0.960557	0.440471		0.772741	0.892383	0.396173
			0.86672	0.86355	0.428509		0.622829	0.960834	0.440923		0.773174	0.8925	0.39658
			0.866779	0.864257	0.428949		0.624299	0.96172	0.441376		0.773666	0.893769	0.396987
			0.869153	0.866035	0.429388		0.624883	0.963016	0.441829		0.774659	0.894552	0.397394
			0.870963	0.866066	0.429828		0.624883	0.963228	0.442282		0.774917	0.895175	0.397801
			0.871011	0.867269	0.430268		0.625201	0.964	0.442734		0.775734	0.895445	0.398208
			0.871659	0.868003	0.430708		0.625286	0.964285	0.443187		0.776208	0.896067	0.398616
			0.872248	0.868694	0.431148		0.627171	0.964917	0.44364		0.776473	0.896307	0.399023
			0.872296	0.868732	0.431588		0.627206	0.965461	0.444092		0.776849	0.897084	0.39943
			0.87273	0.869082	0.432028		0.628041	0.966691	0.444545		0.777083	0.897329	0.399837
			0.873057	0.869128	0.432468		0.628996	0.967077	0.444998		0.777996	0.897438	0.400244
			0.873758	0.869146	0.432908		0.629275	0.967148	0.44545		0.778159	0.897839	0.400651
			0.873963	0.869474	0.433348		0.630115	0.967203	0.445903		0.780316	0.898356	0.401059
			0.874309	0.871057	0.433788		0.630278	0.967786	0.446356		0.780669	0.898576	0.401466
			0.87597	0.871419	0.434228		0.630338	0.969174	0.446809		0.781571	0.898845	0.401873
			0.877776	0.874032	0.434668		0.630502	0.969826	0.447261		0.781785	0.899802	0.40228
			0.877928	0.874167	0.435108		0.630753	0.971039	0.447714		0.781804	0.900196	0.402687
			0.879018	0.874333	0.435548		0.631401	0.972013	0.448167		0.781804	0.901195	0.403094
			0.880301	0.874625	0.435988		0.632029	0.972123	0.448619		0.782363	0.901703	0.403502
			0.880414	0.874795	0.436428		0.632754	0.975838	0.449072		0.783371	0.903013	0.403909
			0.880708	0.875615	0.436868		0.633347	0.976195	0.449525		0.787734	0.903166	0.404316
			0.883417	0.876635	0.437308		0.633486	0.976266	0.449977		0.788592	0.903455	0.404723
			0.883773	0.880716	0.437747		0.633681	0.976907	0.45043		0.788799	0.907703	0.40513
			0.884162	0.881592	0.438187		0.634455	0.977277	0.450883		0.789126	0.909014	0.405537
			0.884612	0.884259	0.438627		0.634647	0.977353	0.451335		0.789494	0.909426	0.405945
			0.884726	0.884438	0.439067		0.634915	0.977599	0.451788		0.789664	0.910247	0.406352
			0.885206	0.884686	0.439507		0.636585	0.977633	0.452241		0.789678	0.910294	0.406759
			0.88538	0.884839	0.439947		0.637598	0.97768	0.452694		0.790725	0.91151	0.407166
			0.886549	0.885503	0.440387		0.637794	0.978372	0.453146		0.790902	0.911566	0.407573
			0.887178	0.885575	0.440827		0.638497	0.978847	0.453599		0.790938	0.911591	0.40798
			0.889099	0.885806	0.441267		0.638538	0.98023	0.454052		0.790945	0.912181	0.408388
			0.889739	0.886529	0.441707		0.639148	0.980606	0.454504		0.791004	0.91295	0.408795
			0.890952	0.886609	0.442147		0.639882	0.981321	0.454957		0.791399	0.916282	0.409202
			0.891016	0.887524	0.442587		0.640121	0.982272	0.45541		0.792064	0.916313	0.409609
			0.892232	0.888599	0.443027		0.640312	0.982722	0.455862		0.792562	0.91671	0.410016
			0.892591	0.888605	0.443467		0.642578	0.983564	0.456315		0.793899	0.91832	0.410423
			0.892786	0.889944	0.443907		0.642617	0.983582	0.456768		0.794019	0.918769	0.410831
			0.892973	0.89228	0.444347		0.643323	0.987243	0.45722		0.795339	0.91892	0.411238
			0.89556	0.893	0.444787		0.643387	0.987487	0.457673		0.795496	0.919106	0.411645
			0.896349	0.893242	0.445227		0.643632	0.987724	0.458126		0.796117	0.919898	0.412052
			0.896723	0.894282	0.445667		0.644716	0.988455	0.458579		0.796932	0.920118	0.412459
			0.896768	0.896695	0.446106		0.644779	0.991301	0.459031		0.797531	0.920407	0.412866
			0.897993	0.897445	0.446546		0.645042	0.991405	0.459484		0.799774	0.920556	0.413274
			0.898047	0.899155	0.446986		0.645298	0.99196	0.459937		0.801066	0.921739	0.413681
			0.898083	0.902082	0.447426		0.645397	0.993775	0.460389		0.801298	0.922939	0.414088
			0.898435	0.902998	0.447866		0.645433	0.994674	0.460842		0.803078	0.925226	0.414495
			0.899107	0.903021	0.448306		0.645955	0.995884	0.461295		0.805346	0.92603	0.414902
			0.900293	0.903214	0.448746		0.646973	0.995971	0.461747		0.807175	0.926373	0.415309
			0.900524	0.904528	0.449186		0.647619	0.997922	0.4622		0.808138	0.927272	0.415717
			0.900944	0.904622	0.449626		0.648616	0.997983	0.462653		0.809775	0.928367	0.416124
			0.901793	0.905234	0.450066		0.649757	0.998162	0.463105		0.810081	0.928848	0.416531
			0.902347	0.905458	0.450506		0.649812	0.999348	0.463558		0.811828	0.929676	0.416938
			0.903864	0.907575	0.450946		0.650214	0.999914	0.464011		0.81225	0.930884	0.417345
			0.904191	0.908616	0.451386		0.650604	1.00027	0.464464		0.81278	0.931373	0.417752
			0.904307	0.908844	0.451826		0.651205	1.0003	0.464916		0.81358	0.931657	0.41816
			0.905299	0.909257	0.452266		0.651586	1.00093	0.465369		0.814238	0.932213	0.418567
			0.905631	0.910043	0.452706		0.652597	1.00106	0.465822		0.814319	0.932253	0.418974
			0.90565	0.910131	0.453146		0.652817	1.00146	0.466274		0.815182	0.933618	0.419381
			0.906186	0.910463	0.453586		0.653427	1.00217	0.466727		0.816144	0.93392	0.419788
			0.906241	0.911477	0.454026		0.653706	1.00244	0.46718		0.816654	0.933996	0.420195
			0.906555	0.911591	0.454465		0.654566	1.0028	0.467632		0.816791	0.935215	0.420603
			0.907112	0.912767	0.454905		0.655416	1.00351	0.468085		0.81804	0.935647	0.42101
			0.909941	0.913651	0.455345		0.656469	1.00363	0.468538		0.821564	0.936185	0.421417
			0.910457	0.915108	0.455785		0.657114	1.00405	0.46899		0.821716	0.936203	0.421824
			0.910725	0.916402	0.456225		0.657343	1.00408	0.469443		0.821846	0.936925	0.422231
			0.913371	0.916557	0.456665		0.657428	1.00415	0.469896		0.821927	0.93719	0.422638
			0.914465	0.917339	0.457105		0.657444	1.00453	0.470349		0.823949	0.937659	0.423046
			0.917389	0.917446	0.457545		0.657711	1.00496	0.470801		0.824911	0.938137	0.423453
			0.920303	0.917469	0.457985		0.658212	1.00668	0.471254		0.824932	0.939496	0.42386
			0.921122	0.917652	0.458425		0.658684	1.0069	0.471707		0.824973	0.940881	0.424267
			0.921887	0.917817	0.458865		0.660348	1.00765	0.472159		0.825286	0.942079	0.424674
			0.922298	0.918927	0.459305		0.660429	1.0084	0.472612		0.825591	0.942455	0.425081
			0.92291	0.919593	0.459745		0.662949	1.00885	0.473065		0.828748	0.942771	0.425489
			0.923204	0.920313	0.460185		0.663754	1.00932	0.473517		0.83015	0.942777	0.425896
			0.925026	0.920696	0.460625		0.664128	1.01032	0.47397		0.832261	0.942813	0.426303
			0.925994	0.921192	0.461065		0.664172	1.01039	0.474423		0.833923	0.94335	0.42671
			0.926679	0.922618	0.461505		0.664273	1.01063	0.474876		0.834198	0.943426	0.427117
			0.926806	0.926993	0.461945		0.664569	1.01208	0.475328		0.836843	0.944573	0.427524
			0.926933	0.927684	0.462385		0.665714	1.01218	0.475781		0.837445	0.9447	0.427932
			0.929923	0.927978	0.462824		0.665768	1.01225	0.476234		0.837685	0.94549	0.428339
			0.930114	0.928272	0.463264		0.666404	1.0129	0.476686		0.837965	0.946969	0.428746
			0.930381	0.929185	0.463704		0.66645	1.01385	0.477139		0.8389	0.947483	0.429153
			0.93046	0.932446	0.464144		0.666989	1.01487	0.477592		0.839029	0.947606	0.42956
			0.931621	0.933527	0.464584		0.667921	1.01514	0.478044		0.839513	0.94796	0.429967
			0.933131	0.934038	0.465024		0.668962	1.01582	0.478497		0.840117	0.950004	0.430375
			0.933236	0.93473	0.465464		0.669099	1.01592	0.47895		0.840324	0.95023	0.430782
			0.933308	0.936375	0.465904		0.669121	1.01627	0.479402		0.840382	0.950314	0.431189
			0.93343	0.936431	0.466344		0.670132	1.01681	0.479855		0.840745	0.951326	0.431596
			0.933787	0.936912	0.466784		0.670314	1.01694	0.480308		0.840825	0.952655	0.432003
			0.937308	0.938327	0.467224		0.670365	1.01815	0.480761		0.841277	0.953585	0.43241
			0.939179	0.939349	0.467664		0.670784	1.01836	0.481213		0.841379	0.953939	0.432818
			0.939314	0.940233	0.468104		0.670996	1.01883	0.481666		0.8426	0.955378	0.433225
			0.941128	0.940725	0.468544		0.671671	1.01895	0.482119		0.843438	0.955614	0.433632
			0.941604	0.940823	0.468984		0.672517	1.01908	0.482571		0.843977	0.955665	0.434039
			0.94195	0.94201	0.469424		0.673241	1.01914	0.483024		0.845319	0.956038	0.434446
			0.942036	0.943959	0.469864		0.673892	1.02047	0.483477		0.845616	0.95623	0.434853
			0.944717	0.944253	0.470304		0.673902	1.02194	0.483929		0.846132	0.957019	0.435261
			0.944888	0.944518	0.470744		0.674269	1.02426	0.484382		0.847628	0.957148	0.435668
			0.94517	0.945519	0.471183		0.6745	1.02559	0.484835		0.849447	0.958253	0.436075
			0.946018	0.946452	0.471623		0.674688	1.02582	0.485287		0.849493	0.959058	0.436482
			0.947856	0.947285	0.472063		0.674981	1.02637	0.48574		0.850553	0.959192	0.436889
			0.948008	0.948496	0.472503		0.67625	1.0268	0.486193		0.850715	0.95945	0.437296
			0.951797	0.94886	0.472943		0.677363	1.02687	0.486646		0.851638	0.960877	0.437704
			0.953019	0.949337	0.473383		0.67797	1.02707	0.487098		0.852546	0.962198	0.438111
			0.953647	0.949973	0.473823		0.678077	1.02901	0.487551		0.853235	0.962602	0.438518
			0.953683	0.950778	0.474263		0.678166	1.02943	0.488004		0.853314	0.962884	0.438925
			0.954049	0.951291	0.474703		0.678355	1.03021	0.488456		0.855394	0.963457	0.439332
			0.954847	0.953185	0.475143		0.678624	1.03029	0.488909		0.855568	0.96383	0.439739
			0.955413	0.9538	0.475583		0.678709	1.03059	0.489362		0.856273	0.964594	0.440147
			0.955665	0.95449	0.476023		0.679191	1.03092	0.489814		0.858332	0.96486	0.440554
			0.956671	0.954897	0.476463		0.679247	1.03104	0.490267		0.859233	0.965053	0.440961
			0.956898	0.956614	0.476903		0.680394	1.03279	0.49072		0.859491	0.965673	0.441368
			0.956911	0.956952	0.477343		0.681832	1.03288	0.491172		0.861036	0.966385	0.441775
			0.956911	0.95723	0.477783		0.682066	1.03359	0.491625		0.861424	0.966605	0.442182
			0.958155	0.958372	0.478223		0.682476	1.03378	0.492078		0.861477	0.967938	0.44259
			0.959492	0.958614	0.478663		0.683554	1.03419	0.492531		0.862032	0.970005	0.442997
			0.960049	0.958622	0.479103		0.684402	1.03475	0.492983		0.862652	0.972013	0.443404
			0.960511	0.958978	0.479542		0.685185	1.03624	0.493436		0.862876	0.972083	0.443811
			0.962975	0.959421	0.479982		0.685822	1.03688	0.493889		0.863111	0.972089	0.444218
			0.963346	0.960209	0.480422		0.686617	1.03726	0.494341		0.864564	0.972802	0.444625
			0.965616	0.960619	0.480862		0.686942	1.0374	0.494794		0.865334	0.974525	0.445033
			0.966408	0.96075	0.481302		0.687078	1.04187	0.495247		0.865727	0.977039	0.44544
			0.967145	0.961012	0.481742		0.687884	1.04212	0.495699		0.866064	0.977814	0.445847
			0.967265	0.963366	0.482182		0.688434	1.0435	0.496152		0.867725	0.97948	0.446254
			0.967984	0.967158	0.482622		0.688626	1.04462	0.496605		0.868139	0.979525	0.446661
			0.968659	0.96716	0.483062		0.689057	1.04726	0.497057		0.868142	0.980823	0.447068
			0.970084	0.967773	0.483502		0.689819	1.04767	0.49751		0.868861	0.980876	0.447476
			0.970325	0.96899	0.483942		0.689897	1.0477	0.497963		0.868941	0.982362	0.447883
			0.970948	0.969182	0.484382		0.690162	1.0484	0.498416		0.870241	0.983061	0.44829
			0.97112	0.970112	0.484822		0.690997	1.0498	0.498868		0.870546	0.986618	0.448697
			0.971859	0.971431	0.485262		0.691396	1.04996	0.499321		0.874816	0.987426	0.449104
			0.97191	0.972703	0.485702		0.691887	1.05221	0.499774		0.874816	0.988636	0.449511
			0.975467	0.974047	0.486142		0.692217	1.05342	0.500226		0.874978	0.989772	0.449919
			0.975576	0.974226	0.486582		0.693385	1.05423	0.500679		0.875163	0.989946	0.450326
			0.975663	0.974444	0.487022		0.694355	1.05456	0.501132		0.87523	0.99037	0.450733
			0.975716	0.975357	0.487462		0.695198	1.05553	0.501584		0.875967	0.991589	0.45114
			0.976006	0.975545	0.487901		0.695231	1.05588	0.502037		0.876195	0.991684	0.451547
			0.977035	0.976003	0.488341		0.695777	1.05742	0.50249		0.876944	0.994311	0.451954
			0.978093	0.976363	0.488781		0.697061	1.05746	0.502943		0.878119	0.994323	0.452362
			0.978107	0.977508	0.489221		0.697134	1.05797	0.503395		0.878866	0.996663	0.452769
			0.979919	0.978915	0.489661		0.697356	1.05805	0.503848		0.879012	0.997551	0.453176
			0.980679	0.979596	0.490101		0.697939	1.05813	0.504301		0.881828	0.997582	0.453583
			0.98078	0.980049	0.490541		0.698018	1.05895	0.504753		0.884266	0.998785	0.45399
			0.980805	0.981452	0.490981		0.698513	1.05956	0.505206		0.884356	0.998788	0.454397
			0.981321	0.983771	0.491421		0.699691	1.06022	0.505659		0.884854	0.999747	0.454805
			0.981649	0.98602	0.491861		0.699998	1.06025	0.506111		0.884961	1.0016	0.455212
			0.981733	0.987369	0.492301		0.700073	1.06033	0.506564		0.885043	1.00202	0.455619
			0.982183	0.987431	0.492741		0.701518	1.06083	0.507017		0.886035	1.00247	0.456026
			0.983081	0.988001	0.493181		0.702015	1.06086	0.507469		0.886951	1.00268	0.456433
			0.984976	0.988942	0.493621		0.702532	1.06221	0.507922		0.887171	1.0031	0.45684
			0.986058	0.989147	0.494061		0.702554	1.06235	0.508375		0.887916	1.00349	0.457248
			0.986186	0.989558	0.494501		0.703736	1.063	0.508828		0.888217	1.00481	0.457655
			0.987258	0.990243	0.494941		0.704836	1.06403	0.50928		0.889204	1.00498	0.458062
			0.987511	0.990403	0.495381		0.706185	1.06604	0.509733		0.889393	1.00512	0.458469
			0.987632	0.992075	0.495821		0.706277	1.06716	0.510186		0.890022	1.00527	0.458876
			0.988674	0.993205	0.49626		0.706796	1.0675	0.510638		0.890219	1.00528	0.459283
			0.988716	0.993583	0.4967		0.706806	1.06824	0.511091		0.890261	1.00653	0.459691
			0.990345	0.994887	0.49714		0.707493	1.06882	0.511544		0.890865	1.00719	0.460098
			0.993832	0.995605	0.49758		0.707775	1.06918	0.511996		0.891574	1.0072	0.460505
			0.995946	0.997778	0.49802		0.70875	1.06972	0.512449		0.891778	1.00742	0.460912
			0.996209	0.998325	0.49846		0.70928	1.07109	0.512902		0.892127	1.00784	0.461319
			0.997626	0.999319	0.4989		0.711125	1.0712	0.513354		0.893959	1.00794	0.461726
			0.998223	0.999425	0.49934		0.711159	1.07172	0.513807		0.895396	1.00824	0.462134
			0.999362	0.999936	0.49978		0.713238	1.07338	0.51426		0.89548	1.01402	0.462541
			1	1	0.50022		0.714348	1.07574	0.514713		0.897132	1.01432	0.462948
			1.00064	1.00006	0.50066		0.715304	1.07628	0.515165		0.898231	1.01573	0.463355
			1.00109	1.00263	0.5011		0.71593	1.07728	0.515618		0.898993	1.01586	0.463762
			1.00161	1.00459	0.50154		0.71653	1.07747	0.516071		0.899449	1.0163	0.464169
			1.00163	1.00465	0.50198		0.716559	1.0802	0.516523		0.901007	1.0167	0.464577
			1.0028	1.00618	0.50242		0.718161	1.08069	0.516976		0.90202	1.01718	0.464984
			1.0068	1.00648	0.50286		0.718886	1.08077	0.517429		0.902468	1.01774	0.465391
			1.00682	1.00681	0.5033		0.71959	1.08179	0.517881		0.903251	1.01891	0.465798
			1.00713	1.00705	0.50374		0.71978	1.08231	0.518334		0.903347	1.01913	0.466205
			1.00754	1.00791	0.504179		0.719919	1.08254	0.518787		0.903785	1.01962	0.466612
			1.00843	1.00856	0.504619		0.720083	1.08474	0.519239		0.904379	1.0209	0.46702
			1.00901	1.00905	0.505059		0.720975	1.08511	0.519692		0.904459	1.02125	0.467427
			1.00923	1.00985	0.505499		0.721578	1.08535	0.520145		0.904574	1.02151	0.467834
			1.01064	1.01012	0.505939		0.721626	1.08605	0.520598		0.904686	1.02156	0.468241
			1.01158	1.01026	0.506379		0.722089	1.08727	0.52105		0.905301	1.0216	0.468648
			1.01168	1.01135	0.506819		0.722393	1.08764	0.521503		0.905782	1.02247	0.469055
			1.01289	1.01177	0.507259		0.722993	1.08792	0.521956		0.906112	1.02557	0.469463
			1.01314	1.01227	0.507699		0.723728	1.08996	0.522408		0.907326	1.0259	0.46987
			1.01418	1.01361	0.508139		0.723874	1.09023	0.522861		0.907397	1.02782	0.470277
			1.01454	1.01572	0.508579		0.725459	1.09039	0.523314		0.90836	1.02793	0.470684
			1.01517	1.01753	0.509019		0.725672	1.0917	0.523766		0.911493	1.02807	0.471091
			1.01531	1.0187	0.509459		0.727467	1.09252	0.524219		0.91392	1.02854	0.471498
			1.01584	1.01946	0.509899		0.728823	1.09404	0.524672		0.916083	1.02886	0.471906
			1.01678	1.01975	0.510339		0.729171	1.09459	0.525124		0.917127	1.029	0.472313
			1.01788	1.02038	0.510779		0.72925	1.09507	0.525577		0.91761	1.02944	0.47272
			1.01896	1.02047	0.511219		0.729577	1.09607	0.52603		0.918278	1.02958	0.473127
			1.01957	1.02219	0.511659		0.729633	1.09665	0.526483		0.918853	1.0302	0.473534
			1.02036	1.02315	0.512099		0.729664	1.09826	0.526935		0.919537	1.03061	0.473941
			1.02159	1.02392	0.512538		0.729946	1.09835	0.527388		0.919697	1.03097	0.474349
			1.02224	1.02418	0.512978		0.730372	1.10011	0.527841		0.919851	1.03381	0.474756
			1.02226	1.02653	0.513418		0.73045	1.10066	0.528293		0.92158	1.03407	0.475163
			1.02237	1.02712	0.513858		0.730647	1.10154	0.528746		0.923319	1.0348	0.47557
			1.02267	1.02746	0.514298		0.73245	1.10174	0.529199		0.92498	1.03501	0.475977
			1.02271	1.02777	0.514738		0.732477	1.10256	0.529651		0.925507	1.03751	0.476384
			1.02524	1.0279	0.515178		0.732618	1.10265	0.530104		0.925933	1.03765	0.476792
			1.02551	1.02817	0.515618		0.732649	1.10356	0.530557		0.92644	1.03784	0.477199
			1.02689	1.0288	0.516058		0.732652	1.10421	0.53101		0.926902	1.03857	0.477606
			1.02718	1.02894	0.516498		0.732832	1.10473	0.531462		0.927277	1.03873	0.478013
			1.02911	1.02936	0.516938		0.733999	1.10704	0.531915		0.928142	1.03887	0.47842
			1.02982	1.02962	0.517378		0.734138	1.10715	0.532368		0.928193	1.03904	0.478827
			1.03142	1.03011	0.517818		0.734867	1.10718	0.53282		0.92831	1.04114	0.479235
			1.03189	1.03051	0.518258		0.735482	1.10735	0.533273		0.929163	1.04129	0.479642
			1.03206	1.03059	0.518698		0.736056	1.1074	0.533726		0.929261	1.0427	0.480049
			1.03247	1.03129	0.519138		0.736517	1.10748	0.534178		0.929655	1.04288	0.480456
			1.03429	1.03143	0.519578		0.739132	1.10943	0.534631		0.929964	1.0433	0.480863
			1.03625	1.03445	0.520018		0.739754	1.11122	0.535084		0.930747	1.04359	0.48127
			1.03857	1.03551	0.520458		0.73998	1.1116	0.535536		0.93114	1.0442	0.481678
			1.03958	1.03565	0.520897		0.740262	1.11252	0.535989		0.932785	1.04488	0.482085
			1.04081	1.03642	0.521337		0.740698	1.11267	0.536442		0.933194	1.04492	0.482492
			1.04107	1.03786	0.521777		0.74192	1.11296	0.536895		0.93349	1.04574	0.482899
			1.04244	1.0379	0.522217		0.741991	1.11369	0.537347		0.93585	1.04575	0.483306
			1.04254	1.03836	0.522657		0.742912	1.11412	0.5378		0.940334	1.04648	0.483713
			1.04316	1.03842	0.523097		0.742914	1.11423	0.538253		0.940373	1.04672	0.484121
			1.04506	1.03855	0.523537		0.74334	1.11438	0.538705		0.942556	1.04726	0.484528
			1.04752	1.03881	0.523977		0.743849	1.11442	0.539158		0.943194	1.04965	0.484935
			1.04834	1.03885	0.524417		0.744065	1.11622	0.539611		0.943851	1.05132	0.485342
			1.0489	1.03898	0.524857		0.74428	1.11661	0.540063		0.944232	1.05238	0.485749
			1.05042	1.03943	0.525297		0.74429	1.12033	0.540516		0.945933	1.05432	0.486156
			1.05264	1.03976	0.525737		0.744702	1.12178	0.540969		0.946011	1.05446	0.486564
			1.05365	1.04104	0.526177		0.745182	1.12179	0.541421		0.950156	1.05473	0.486971
			1.05521	1.0417	0.526617		0.749499	1.1231	0.541874		0.951166	1.05511	0.487378
			1.0558	1.04188	0.527057		0.750574	1.12342	0.542327		0.951788	1.05527	0.487785
			1.05684	1.04201	0.527497		0.751878	1.12441	0.54278		0.955723	1.05572	0.488192
			1.05729	1.04359	0.527937		0.752514	1.12496	0.543232		0.956385	1.05636	0.488599
			1.05873	1.04389	0.528377		0.752981	1.12607	0.543685		0.957495	1.05646	0.489007
			1.05911	1.04413	0.528817		0.753598	1.12652	0.544138		0.959984	1.05806	0.489414
			1.06029	1.04551	0.529256		0.754366	1.12664	0.54459		0.961065	1.05848	0.489821
			1.06044	1.04791	0.529696		0.755157	1.12858	0.545043		0.961289	1.0586	0.490228
			1.06252	1.04897	0.530136		0.755573	1.12916	0.545496		0.962998	1.05937	0.490635
			1.06437	1.04912	0.530576		0.755937	1.13099	0.545948		0.963045	1.05992	0.491042
			1.06691	1.04949	0.531016		0.756231	1.13146	0.546401		0.963438	1.06098	0.49145
			1.06857	1.05091	0.531456		0.758401	1.13159	0.546854		0.963525	1.06282	0.491857
			1.06952	1.05382	0.531896		0.758783	1.13595	0.547306		0.964053	1.06286	0.492264
			1.0696	1.05438	0.532336		0.758841	1.13609	0.547759		0.964553	1.06366	0.492671
			1.07111	1.05747	0.532776		0.758899	1.13773	0.548212		0.965495	1.06486	0.493078
			1.07147	1.05758	0.533216		0.759046	1.13792	0.548665		0.965918	1.06488	0.493485
			1.07204	1.05786	0.533656		0.759696	1.13852	0.549117		0.967511	1.06528	0.493893
			1.07239	1.05832	0.534096		0.759779	1.13969	0.54957		0.967672	1.0674	0.4943
			1.07247	1.05954	0.534536		0.759892	1.14144	0.550023		0.967769	1.06886	0.494707
			1.07342	1.06078	0.534976		0.760719	1.14161	0.550475		0.967924	1.06945	0.495114
			1.07466	1.06126	0.535416		0.760785	1.14207	0.550928		0.970189	1.06979	0.495521
			1.07622	1.06269	0.535856		0.762849	1.14213	0.551381		0.971013	1.07002	0.495928
			1.07822	1.06298	0.536296		0.762968	1.14245	0.551833		0.971076	1.07043	0.496336
			1.07857	1.06378	0.536736		0.763078	1.14255	0.552286		0.971939	1.07088	0.496743
			1.0787	1.06384	0.537176		0.763547	1.14376	0.552739		0.973226	1.0713	0.49715
			1.07968	1.06481	0.537615		0.763564	1.14521	0.553191		0.973825	1.07194	0.497557
			1.07999	1.06523	0.538055		0.764122	1.14937	0.553644		0.974011	1.0756	0.497964
			1.08298	1.06677	0.538495		0.764401	1.15177	0.554097		0.97445	1.07593	0.498371
			1.08377	1.0691	0.538935		0.764995	1.15273	0.55455		0.975609	1.07699	0.498779
			1.08462	1.07252	0.539375		0.765976	1.15365	0.555002		0.976892	1.07765	0.499186
			1.08938	1.0739	0.539815		0.766025	1.15574	0.555455		0.977007	1.07767	0.499593
			1.09265	1.074	0.540255		0.767094	1.15798	0.555908		0.978894	1.07944	0.5
			1.09305	1.07468	0.540695		0.767278	1.15971	0.55636		0.981189	1.07945	0.500407
			1.09329	1.07546	0.541135		0.767767	1.1601	0.556813		0.984987	1.07986	0.500814
			1.094	1.07559	0.541575		0.767994	1.1622	0.557266		0.985752	1.08102	0.501221
			1.09438	1.07574	0.542015		0.76811	1.16296	0.557718		0.986091	1.08199	0.501629
			1.09578	1.07731	0.542455		0.768317	1.16501	0.558171		0.986548	1.08319	0.502036
			1.0964	1.08127	0.542895		0.768575	1.16528	0.558624		0.986687	1.0846	0.502443
			1.09654	1.08185	0.543335		0.768911	1.16529	0.559077		0.987004	1.08511	0.50285
			1.09879	1.08192	0.543775		0.768937	1.16574	0.559529		0.988012	1.08561	0.503257
			1.09915	1.08294	0.544215		0.76942	1.16629	0.559982		0.989374	1.08603	0.503664
			1.10086	1.08403	0.544655		0.770016	1.16785	0.560435		0.990143	1.08667	0.504072
			1.10443	1.08494	0.545095		0.771089	1.16831	0.560887		0.993213	1.08703	0.504479
			1.1065	1.08509	0.545535		0.771319	1.16877	0.56134		0.994637	1.08778	0.504886
			1.10678	1.08555	0.545974		0.771853	1.16964	0.561793		0.995563	1.08787	0.505293
			1.10688	1.08716	0.546414		0.771885	1.16973	0.562245		0.995698	1.08868	0.5057
			1.10733	1.08718	0.546854		0.77208	1.1703	0.562698		0.99752	1.08982	0.506107
			1.10853	1.08784	0.547294		0.772115	1.1709	0.563151		1.00004	1.09007	0.506515
			1.11087	1.08855	0.547734		0.772974	1.17206	0.563603		1.00053	1.09047	0.506922
			1.11325	1.08964	0.548174		0.773187	1.17249	0.564056		1.00098	1.09124	0.507329
			1.11383	1.08979	0.548614		0.774587	1.17288	0.564509		1.0016	1.09176	0.507736
			1.11455	1.0909	0.549054		0.776265	1.17305	0.564962		1.00162	1.09299	0.508143
			1.11568	1.09149	0.549494		0.776413	1.17346	0.565414		1.00174	1.0933	0.50855
			1.11636	1.09206	0.549934		0.776446	1.17508	0.565867		1.00293	1.09507	0.508958
			1.119	1.09283	0.550374		0.777459	1.17581	0.56632		1.00372	1.09651	0.509365
			1.11977	1.09371	0.550814		0.779866	1.17674	0.566772		1.00534	1.09709	0.509772
			1.11992	1.09425	0.551254		0.779991	1.17737	0.567225		1.00543	1.09753	0.510179
			1.12106	1.09448	0.551694		0.780515	1.18272	0.567678		1.00851	1.0987	0.510586
			1.1223	1.09504	0.552134		0.780878	1.18311	0.56813		1.00882	1.09874	0.510993
			1.12387	1.09508	0.552574		0.782781	1.18344	0.568583		1.01047	1.09899	0.511401
			1.12431	1.09553	0.553014		0.783626	1.18398	0.569036		1.01049	1.09899	0.511808
			1.12604	1.09577	0.553454		0.783926	1.18425	0.569488		1.01312	1.101	0.512215
			1.12661	1.09671	0.553894		0.784915	1.18589	0.569941		1.01412	1.10108	0.512622
			1.12709	1.0974	0.554333		0.785543	1.18672	0.570394		1.01438	1.10147	0.513029
			1.1284	1.10018	0.554773		0.786605	1.18701	0.570847		1.01517	1.10151	0.513436
			1.12851	1.10169	0.555213		0.787096	1.18837	0.571299		1.01541	1.10158	0.513844
			1.12954	1.10217	0.555653		0.787149	1.18887	0.571752		1.01563	1.10191	0.514251
			1.13043	1.10271	0.556093		0.787571	1.18906	0.572205		1.01795	1.10212	0.514658
			1.13065	1.1032	0.556533		0.787702	1.18947	0.572657		1.01875	1.10394	0.515065
			1.13216	1.10344	0.556973		0.788	1.18987	0.57311		1.01931	1.10446	0.515472
			1.13233	1.10415	0.557413		0.788203	1.18993	0.573563		1.01969	1.10455	0.515879
			1.13401	1.10512	0.557853		0.78866	1.1906	0.574015		1.0235	1.10504	0.516287
			1.13445	1.10513	0.558293		0.788928	1.19092	0.574468		1.02426	1.10557	0.516694
			1.13526	1.10519	0.558733		0.790158	1.19125	0.574921		1.02439	1.10607	0.517101
			1.13534	1.1052	0.559173		0.79023	1.19133	0.575373		1.02443	1.10681	0.517508
			1.13715	1.10551	0.559613		0.790659	1.19325	0.575826		1.02506	1.10693	0.517915
			1.13727	1.10557	0.560053		0.790885	1.19368	0.576279		1.02934	1.10774	0.518322
			1.13734	1.10623	0.560493		0.791808	1.19572	0.576732		1.02961	1.10887	0.51873
			1.1374	1.10661	0.560933		0.79187	1.19635	0.577184		1.02992	1.10904	0.519137
			1.13794	1.10706	0.561373		0.791996	1.19769	0.577637		1.02993	1.10921	0.519544
			1.1405	1.10785	0.561813		0.792111	1.19784	0.57809		1.03043	1.10935	0.519951
			1.14115	1.10787	0.562253		0.793047	1.19789	0.578542		1.03064	1.11013	0.520358
			1.14163	1.10874	0.562692		0.793172	1.19805	0.578995		1.03169	1.11063	0.520765
			1.14341	1.10893	0.563132		0.793273	1.19904	0.579448		1.03232	1.11208	0.521173
			1.14435	1.10989	0.563572		0.79504	1.19943	0.5799		1.0328	1.11425	0.52158
			1.14544	1.11017	0.564012		0.79518	1.20044	0.580353		1.03319	1.1162	0.521987
			1.14584	1.11093	0.564452		0.795268	1.20134	0.580806		1.03465	1.11748	0.522394
			1.14655	1.11172	0.564892		0.795341	1.2019	0.581258		1.0348	1.11891	0.522801
			1.14798	1.11208	0.565332		0.795399	1.20226	0.581711		1.03489	1.11943	0.523208
			1.1483	1.11296	0.565772		0.795975	1.20251	0.582164		1.03502	1.11953	0.523616
			1.15116	1.11379	0.566212		0.796143	1.20287	0.582617		1.03514	1.12109	0.524023
			1.1527	1.11446	0.566652		0.796506	1.20326	0.583069		1.03542	1.12117	0.52443
			1.15416	1.11447	0.567092		0.797237	1.2043	0.583522		1.03667	1.12232	0.524837
			1.1546	1.11454	0.567532		0.799497	1.20446	0.583975		1.03667	1.12286	0.525244
			1.15661	1.11584	0.567972		0.799666	1.20655	0.584427		1.03763	1.12309	0.525651
			1.15757	1.11595	0.568412		0.799886	1.20752	0.58488		1.03961	1.12335	0.526059
			1.15803	1.11717	0.568852		0.800887	1.20764	0.585333		1.04014	1.1248	0.526466
			1.16059	1.11803	0.569292		0.801174	1.20779	0.585785		1.04073	1.12543	0.526873
			1.16064	1.12005	0.569732		0.801812	1.20847	0.586238		1.04225	1.12618	0.52728
			1.16079	1.12017	0.570172		0.802784	1.21012	0.586691		1.04383	1.1268	0.527687
			1.1613	1.12096	0.570612		0.80299	1.21115	0.587144		1.04521	1.12855	0.528094
			1.16211	1.12128	0.571051		0.803026	1.21162	0.587596		1.04639	1.12932	0.528502
			1.16257	1.12197	0.571491		0.803908	1.21279	0.588049		1.0475	1.12962	0.528909
			1.16281	1.12259	0.571931		0.804701	1.21311	0.588502		1.05003	1.12992	0.529316
			1.16419	1.12279	0.572371		0.804905	1.21502	0.588954		1.05229	1.13101	0.529723
			1.16429	1.12426	0.572811		0.805329	1.21795	0.589407		1.053	1.13157	0.53013
			1.16554	1.12523	0.573251		0.805551	1.21834	0.58986		1.05324	1.13188	0.530537
			1.16809	1.12533	0.573691		0.805554	1.21879	0.590312		1.05371	1.13247	0.530945
			1.16816	1.12621	0.574131		0.80578	1.21962	0.590765		1.05424	1.13248	0.531352
			1.1688	1.12634	0.574571		0.805947	1.21964	0.591218		1.05494	1.13256	0.531759
			1.17223	1.12829	0.575011		0.805979	1.22099	0.59167		1.05622	1.13257	0.532166
			1.17278	1.12871	0.575451		0.806281	1.22203	0.592123		1.05645	1.13268	0.532573
			1.17329	1.12898	0.575891		0.806845	1.22234	0.592576		1.05731	1.13341	0.53298
			1.17368	1.1328	0.576331		0.807911	1.22314	0.593029		1.05972	1.13442	0.533388
			1.17497	1.13298	0.576771		0.810345	1.22335	0.593481		1.06004	1.13551	0.533795
			1.17545	1.13775	0.577211		0.810851	1.22598	0.593934		1.06081	1.1361	0.534202
			1.17603	1.14059	0.577651		0.811196	1.2272	0.594387		1.06094	1.13618	0.534609
			1.17836	1.14071	0.578091		0.812156	1.22914	0.594839		1.06251	1.13704	0.535016
			1.18005	1.14134	0.578531		0.812242	1.22917	0.595292		1.06604	1.13837	0.535423
			1.18136	1.14201	0.578971		0.812244	1.23144	0.595745		1.06628	1.13856	0.535831
			1.18175	1.1421	0.57941		0.81297	1.23216	0.596197		1.06647	1.1391	0.536238
			1.18259	1.14547	0.57985		0.813106	1.23231	0.59665		1.06657	1.1397	0.536645
			1.18293	1.14597	0.58029		0.813391	1.23271	0.597103		1.06772	1.14006	0.537052
			1.18344	1.14853	0.58073		0.814004	1.23283	0.597555		1.06785	1.14086	0.537459
			1.18529	1.14859	0.58117		0.814262	1.23313	0.598008		1.06865	1.14117	0.537866
			1.18539	1.14923	0.58161		0.814964	1.23326	0.598461		1.06872	1.14184	0.538274
			1.18783	1.14923	0.58205		0.815341	1.23345	0.598914		1.07032	1.143	0.538681
			1.18801	1.15048	0.58249		0.815718	1.23558	0.599366		1.07051	1.14304	0.539088
			1.19266	1.15082	0.58293		0.815902	1.23659	0.599819		1.071	1.14398	0.539495
			1.19666	1.152	0.58337		0.816148	1.23663	0.600272		1.07128	1.14423	0.539902
			1.19711	1.15204	0.58381		0.816435	1.23677	0.600724		1.07208	1.14481	0.540309
			1.19751	1.15311	0.58425		0.816652	1.23861	0.601177		1.07346	1.14646	0.540717
			1.20022	1.15519	0.58469		0.816809	1.24056	0.60163		1.07374	1.14675	0.541124
			1.20111	1.15904	0.58513		0.817346	1.24074	0.602082		1.07417	1.14698	0.541531
			1.20196	1.16159	0.58557		0.81771	1.24167	0.602535		1.07442	1.14898	0.541938
			1.20278	1.16185	0.58601		0.818751	1.24202	0.602988		1.07549	1.14993	0.542345
			1.20295	1.16331	0.58645		0.818857	1.24226	0.60344		1.07624	1.15032	0.542752
			1.204	1.16425	0.58689		0.818944	1.24234	0.603893		1.07974	1.15039	0.54316
			1.2042	1.16603	0.58733		0.819405	1.24293	0.604346		1.08048	1.15048	0.543567
			1.20484	1.16611	0.587769		0.820248	1.24315	0.604799		1.08079	1.15092	0.543974
			1.20496	1.16645	0.588209		0.821384	1.24318	0.605251		1.08158	1.15189	0.544381
			1.20533	1.16655	0.588649		0.82177	1.24583	0.605704		1.0828	1.15326	0.544788
			1.20714	1.16714	0.589089		0.822868	1.24614	0.606157		1.0832	1.15349	0.545195
			1.209	1.16959	0.589529		0.822999	1.24916	0.606609		1.08371	1.15381	0.545603
			1.20966	1.17146	0.589969		0.823436	1.24935	0.607062		1.08435	1.15433	0.54601
			1.21002	1.17443	0.590409		0.824046	1.24947	0.607515		1.08505	1.15461	0.546417
			1.21019	1.17508	0.590849		0.824888	1.24974	0.607967		1.08559	1.15566	0.546824
			1.21297	1.17514	0.591289		0.825545	1.25158	0.60842		1.08721	1.15679	0.547231
			1.21347	1.1755	0.591729		0.826025	1.25199	0.608873		1.08861	1.1577	0.547638
			1.21585	1.17594	0.592169		0.826091	1.2521	0.609325		1.08882	1.15825	0.548046
			1.21774	1.17674	0.592609		0.827991	1.25223	0.609778		1.0921	1.15988	0.548453
			1.2181	1.17681	0.593049		0.833145	1.25353	0.610231		1.09298	1.16022	0.54886
			1.21853	1.17808	0.593489		0.833509	1.2543	0.610684		1.09305	1.16099	0.549267
			1.21874	1.18045	0.593929		0.833834	1.25769	0.611136		1.09419	1.16258	0.549674
			1.21896	1.18313	0.594369		0.834775	1.25801	0.611589		1.09451	1.16275	0.550081
			1.21958	1.18728	0.594809		0.834824	1.25851	0.612042		1.09591	1.16363	0.550489
			1.22037	1.18755	0.595249		0.83574	1.25913	0.612494		1.09606	1.16389	0.550896
			1.22184	1.18791	0.595689		0.836998	1.25923	0.612947		1.09637	1.1657	0.551303
			1.22276	1.18821	0.596128		0.837327	1.26034	0.6134		1.09779	1.16573	0.55171
			1.22293	1.18997	0.596568		0.837705	1.26099	0.613852		1.09896	1.16597	0.552117
			1.22532	1.19013	0.597008		0.837791	1.26179	0.614305		1.10032	1.16612	0.552524
			1.22636	1.191	0.597448		0.840947	1.26222	0.614758		1.10381	1.16711	0.552932
			1.22646	1.19172	0.597888		0.841356	1.26339	0.615211		1.1046	1.16869	0.553339
			1.22716	1.19191	0.598328		0.84289	1.26383	0.615663		1.10512	1.17057	0.553746
			1.22719	1.19585	0.598768		0.843587	1.26485	0.616116		1.10522	1.17119	0.554153
			1.22867	1.19687	0.599208		0.845121	1.26772	0.616569		1.1065	1.17319	0.55456
			1.22948	1.19854	0.599648		0.845181	1.26885	0.617021		1.10768	1.17444	0.554967
			1.22965	1.20003	0.600088		0.845795	1.27007	0.617474		1.10929	1.17449	0.555375
			1.23001	1.20069	0.600528		0.845922	1.271	0.617927		1.10989	1.17477	0.555782
			1.23035	1.2011	0.600968		0.846743	1.27307	0.618379		1.11045	1.1753	0.556189
			1.23049	1.2013	0.601408		0.847761	1.27443	0.618832		1.1145	1.17541	0.556596
			1.23119	1.20291	0.601848		0.85005	1.27457	0.619285		1.11511	1.1767	0.557003
			1.23129	1.20686	0.602288		0.850102	1.27473	0.619737		1.11576	1.17753	0.55741
			1.23715	1.20692	0.602728		0.850214	1.27486	0.62019		1.11601	1.17768	0.557818
			1.23746	1.20692	0.603168		0.850224	1.27584	0.620643		1.11701	1.17806	0.558225
			1.23889	1.20704	0.603608		0.85036	1.27668	0.621096		1.11777	1.17886	0.558632
			1.24117	1.20821	0.604048		0.852127	1.27774	0.621548		1.12096	1.18152	0.559039
			1.24256	1.20873	0.604487		0.852183	1.2808	0.622001		1.12112	1.1817	0.559446
			1.24498	1.21209	0.604927		0.852702	1.28652	0.622454		1.12119	1.18189	0.559853
			1.24533	1.21978	0.605367		0.852716	1.28751	0.622906		1.12384	1.18248	0.560261
			1.24796	1.22094	0.605807		0.85282	1.28821	0.623359		1.12385	1.18562	0.560668
			1.24813	1.22116	0.606247		0.854054	1.2912	0.623812		1.12505	1.1868	0.561075
			1.2495	1.2222	0.606687		0.85564	1.29156	0.624264		1.12516	1.18747	0.561482
			1.25589	1.22421	0.607127		0.856275	1.2926	0.624717		1.12522	1.18788	0.561889
			1.25921	1.22436	0.607567		0.858117	1.29402	0.62517		1.12535	1.18823	0.562296
			1.2603	1.22479	0.608007		0.858445	1.29463	0.625622		1.12694	1.18851	0.562704
			1.26064	1.22482	0.608447		0.861381	1.29677	0.626075		1.12712	1.18999	0.563111
			1.26279	1.22506	0.608887		0.861475	1.29735	0.626528		1.12753	1.19026	0.563518
			1.26332	1.22522	0.609327		0.861534	1.29843	0.626981		1.12768	1.19038	0.563925
			1.26561	1.22526	0.609767		0.861812	1.3009	0.627433		1.12802	1.19118	0.564332
			1.26613	1.22593	0.610207		0.861836	1.30149	0.627886		1.12836	1.19148	0.564739
			1.26885	1.22678	0.610647		0.862161	1.30278	0.628339		1.13167	1.19262	0.565147
			1.26975	1.22802	0.611087		0.862372	1.30317	0.628791		1.13246	1.19625	0.565554
			1.2702	1.22837	0.611527		0.862915	1.30469	0.629244		1.13391	1.19659	0.565961
			1.27218	1.22941	0.611967		0.864081	1.30584	0.629697		1.13411	1.19811	0.566368
			1.27319	1.23014	0.612407		0.864169	1.30596	0.630149		1.13508	1.20145	0.566775
			1.27426	1.2313	0.612846		0.864752	1.30656	0.630602		1.13518	1.20182	0.567182
			1.27541	1.2323	0.613286		0.864859	1.30941	0.631055		1.13524	1.20231	0.56759
			1.27597	1.23325	0.613726		0.865739	1.3096	0.631507		1.13564	1.20264	0.567997
			1.27657	1.23475	0.614166		0.866284	1.31048	0.63196		1.13776	1.20351	0.568404
			1.27728	1.23524	0.614606		0.866622	1.31086	0.632413		1.13826	1.20372	0.568811
			1.27827	1.23685	0.615046		0.867987	1.31143	0.632866		1.13839	1.2049	0.569218
			1.27852	1.23774	0.615486		0.86808	1.31209	0.633318		1.13889	1.20504	0.569625
			1.27913	1.23811	0.615926		0.868881	1.31219	0.633771		1.14018	1.20508	0.570033
			1.27935	1.23812	0.616366		0.869724	1.31279	0.634224		1.14024	1.20617	0.57044
			1.28199	1.23836	0.616806		0.870385	1.31576	0.634676		1.14181	1.20695	0.570847
			1.28366	1.23908	0.617246		0.870756	1.31598	0.635129		1.14207	1.20778	0.571254
			1.28372	1.24248	0.617686		0.870834	1.31631	0.635582		1.14366	1.20796	0.571661
			1.28372	1.24393	0.618126		0.871974	1.3164	0.636034		1.14548	1.20859	0.572068
			1.28539	1.24594	0.618566		0.871997	1.3164	0.636487		1.14628	1.20921	0.572476
			1.28626	1.24672	0.619006		0.872238	1.31816	0.63694		1.14663	1.21163	0.572883
			1.28698	1.24875	0.619446		0.872759	1.31915	0.637392		1.14685	1.21239	0.57329
			1.28761	1.2499	0.619886		0.873214	1.32165	0.637845		1.14732	1.2127	0.573697
			1.2877	1.25023	0.620326		0.873687	1.32171	0.638298		1.14758	1.21524	0.574104
			1.28914	1.25362	0.620766		0.873811	1.32531	0.638751		1.14837	1.22061	0.574511
			1.29072	1.25509	0.621205		0.875752	1.32726	0.639203		1.15078	1.22223	0.574919
			1.29636	1.25587	0.621645		0.876145	1.32828	0.639656		1.15088	1.22243	0.575326
			1.29675	1.25634	0.622085		0.876604	1.32844	0.640109		1.15089	1.22305	0.575733
			1.29948	1.25659	0.622525		0.877133	1.32858	0.640561		1.15178	1.22365	0.57614
			1.30011	1.25766	0.622965		0.87763	1.329	0.641014		1.15198	1.22527	0.576547
			1.3007	1.25842	0.623405		0.879299	1.32985	0.641467		1.15344	1.22554	0.576954
			1.3017	1.25852	0.623845		0.879598	1.33218	0.641919		1.15396	1.22603	0.577362
			1.30362	1.26042	0.624285		0.879727	1.33323	0.642372		1.15396	1.22736	0.577769
			1.30397	1.26125	0.624725		0.881365	1.33425	0.642825		1.15408	1.2275	0.578176
			1.30422	1.26196	0.625165		0.881912	1.33436	0.643278		1.15615	1.2285	0.578583
			1.3048	1.2627	0.625605		0.882326	1.33745	0.64373		1.1564	1.22876	0.57899
			1.30529	1.26449	0.626045		0.884211	1.33771	0.644183		1.15786	1.22879	0.579397
			1.30653	1.26482	0.626485		0.884257	1.33811	0.644636		1.15884	1.22964	0.579805
			1.30799	1.26508	0.626925		0.884822	1.33823	0.645088		1.15965	1.23011	0.580212
			1.3094	1.26678	0.627365		0.885076	1.3386	0.645541		1.16027	1.23043	0.580619
			1.30952	1.26855	0.627805		0.885693	1.33925	0.645994		1.16121	1.23499	0.581026
			1.30995	1.26916	0.628245		0.88646	1.34067	0.646446		1.16294	1.23626	0.581433
			1.3101	1.26995	0.628685		0.886518	1.34228	0.646899		1.16346	1.23993	0.58184
			1.31204	1.2702	0.629125		0.887332	1.34231	0.647352		1.1638	1.24057	0.582248
			1.3129	1.27046	0.629564		0.887353	1.34251	0.647804		1.16393	1.24074	0.582655
			1.31334	1.27054	0.630004		0.889249	1.34283	0.648257		1.16454	1.24266	0.583062
			1.31391	1.27267	0.630444		0.88971	1.34337	0.64871		1.16502	1.24333	0.583469
			1.31426	1.27487	0.630884		0.88978	1.34398	0.649163		1.16543	1.2442	0.583876
			1.31469	1.27587	0.631324		0.890415	1.3447	0.649615		1.16545	1.24433	0.584283
			1.31656	1.27643	0.631764		0.890644	1.34497	0.650068		1.16705	1.24503	0.584691
			1.3169	1.27689	0.632204		0.890729	1.34545	0.650521		1.16778	1.24583	0.585098
			1.3171	1.28075	0.632644		0.891559	1.34786	0.650973		1.1678	1.24602	0.585505
			1.32067	1.28196	0.633084		0.893001	1.34798	0.651426		1.16851	1.24626	0.585912
			1.3208	1.28263	0.633524		0.893935	1.34826	0.651879		1.16876	1.24682	0.586319
			1.32102	1.28355	0.633964		0.894203	1.35046	0.652331		1.16988	1.24703	0.586726
			1.32197	1.28803	0.634404		0.895345	1.35283	0.652784		1.17085	1.24869	0.587134
			1.32533	1.28808	0.634844		0.896013	1.35302	0.653237		1.17235	1.25036	0.587541
			1.32589	1.2883	0.635284		0.896915	1.3537	0.653689		1.17419	1.2504	0.587948
			1.32634	1.29034	0.635724		0.897511	1.35401	0.654142		1.17657	1.25113	0.588355
			1.32722	1.29227	0.636164		0.89838	1.35473	0.654595		1.1771	1.25208	0.588762
			1.32753	1.29444	0.636604		0.899377	1.35602	0.655048		1.17882	1.25422	0.589169
			1.32809	1.29517	0.637044		0.901402	1.35613	0.6555		1.18029	1.25532	0.589577
			1.32939	1.29572	0.637484		0.902336	1.35692	0.655953		1.18059	1.25548	0.589984
			1.32975	1.29743	0.637923		0.902363	1.35692	0.656406		1.18131	1.26022	0.590391
			1.33086	1.29806	0.638363		0.902518	1.35695	0.656858		1.18285	1.26023	0.590798
			1.33166	1.29914	0.638803		0.902893	1.35958	0.657311		1.1838	1.26126	0.591205
			1.33332	1.30149	0.639243		0.904918	1.36032	0.657764		1.18427	1.26206	0.591612
			1.33566	1.30196	0.639683		0.904999	1.36078	0.658216		1.19148	1.26236	0.59202
			1.33869	1.30276	0.640123		0.905579	1.36152	0.658669		1.19218	1.2634	0.592427
			1.33909	1.30382	0.640563		0.906706	1.36204	0.659122		1.19401	1.26409	0.592834
			1.3395	1.30458	0.641003		0.907572	1.36506	0.659574		1.19563	1.26584	0.593241
			1.34017	1.30516	0.641443		0.907835	1.36642	0.660027		1.19625	1.26605	0.593648
			1.34195	1.30541	0.641883		0.908464	1.37081	0.66048		1.19651	1.26755	0.594055
			1.34376	1.30567	0.642323		0.9086	1.37094	0.660933		1.19839	1.26898	0.594463
			1.34662	1.30583	0.642763		0.909092	1.37458	0.661385		1.19878	1.27121	0.59487
			1.3473	1.30709	0.643203		0.909529	1.37623	0.661838		1.199	1.27198	0.595277
			1.34778	1.30957	0.643643		0.910119	1.37653	0.662291		1.201	1.27315	0.595684
			1.35054	1.31092	0.644083		0.912955	1.37665	0.662743		1.20143	1.27399	0.596091
			1.35343	1.31285	0.644523		0.913171	1.37762	0.663196		1.20206	1.27429	0.596498
			1.35364	1.31401	0.644963		0.913215	1.37895	0.663649		1.2027	1.2744	0.596906
			1.35483	1.31944	0.645403		0.915634	1.3791	0.664101		1.20345	1.27493	0.597313
			1.35746	1.31986	0.645842		0.916349	1.37966	0.664554		1.20438	1.27599	0.59772
			1.3595	1.31997	0.646282		0.916474	1.37981	0.665007		1.20666	1.27631	0.598127
			1.36027	1.32006	0.646722		0.916635	1.38132	0.665459		1.20712	1.27632	0.598534
			1.36112	1.32227	0.647162		0.916791	1.38269	0.665912		1.20764	1.27676	0.598941
			1.36334	1.32666	0.647602		0.917188	1.3834	0.666365		1.20769	1.27676	0.599349
			1.3643	1.3271	0.648042		0.919651	1.38403	0.666818		1.2089	1.27756	0.599756
			1.36482	1.32728	0.648482		0.920487	1.38505	0.66727		1.20918	1.27769	0.600163
			1.36609	1.32974	0.648922		0.922079	1.38585	0.667723		1.20994	1.27908	0.60057
			1.36809	1.33108	0.649362		0.922862	1.38687	0.668176		1.21221	1.27981	0.600977
			1.36919	1.33202	0.649802		0.924066	1.38758	0.668628		1.2132	1.28166	0.601384
			1.37154	1.33427	0.650242		0.924549	1.38903	0.669081		1.21486	1.28235	0.601792
			1.37207	1.33431	0.650682		0.925258	1.39088	0.669534		1.21515	1.28239	0.602199
			1.38317	1.33439	0.651122		0.925286	1.39525	0.669986		1.21555	1.28417	0.602606
			1.38362	1.33685	0.651562		0.925314	1.39594	0.670439		1.21572	1.28516	0.603013
			1.38409	1.33781	0.652002		0.92571	1.39671	0.670892		1.2167	1.28517	0.60342
			1.38454	1.33899	0.652442		0.926238	1.3993	0.671344		1.21763	1.28571	0.603827
			1.38735	1.33939	0.652882		0.92692	1.39933	0.671797		1.21892	1.28908	0.604235
			1.39311	1.34107	0.653322		0.928463	1.39954	0.67225		1.22115	1.28974	0.604642
			1.39376	1.34272	0.653762		0.929323	1.39964	0.672703		1.22208	1.29152	0.605049
			1.39406	1.34326	0.654201		0.930103	1.4024	0.673155		1.2249	1.29173	0.605456
			1.39442	1.34357	0.654641		0.930498	1.40253	0.673608		1.22612	1.2925	0.605863
			1.39451	1.34364	0.655081		0.931805	1.40295	0.674061		1.22623	1.29262	0.60627
			1.39818	1.34673	0.655521		0.93267	1.40536	0.674513		1.22648	1.29304	0.606678
			1.39873	1.34694	0.655961		0.932766	1.40597	0.674966		1.22999	1.2932	0.607085
			1.39984	1.34722	0.656401		0.932952	1.40709	0.675419		1.2306	1.29352	0.607492
			1.40059	1.34751	0.656841		0.933141	1.40906	0.675871		1.23251	1.29618	0.607899
			1.40299	1.34957	0.657281		0.935117	1.40993	0.676324		1.23256	1.29739	0.608306
			1.40707	1.35035	0.657721		0.935319	1.41198	0.676777		1.23348	1.29747	0.608713
			1.4075	1.35399	0.658161		0.935976	1.41292	0.67723		1.23776	1.29854	0.609121
			1.40752	1.35476	0.658601		0.937764	1.41408	0.677682		1.23878	1.29857	0.609528
			1.40931	1.35561	0.659041		0.937968	1.41501	0.678135		1.23911	1.29964	0.609935
			1.41076	1.35618	0.659481		0.938008	1.41506	0.678588		1.23972	1.30279	0.610342
			1.41118	1.35641	0.659921		0.938087	1.41796	0.67904		1.24049	1.30327	0.610749
			1.41274	1.36122	0.660361		0.938159	1.41816	0.679493		1.24586	1.30425	0.611156
			1.41315	1.36164	0.660801		0.938564	1.41847	0.679946		1.24622	1.30523	0.611564
			1.4168	1.36306	0.661241		0.938837	1.42078	0.680398		1.24642	1.3061	0.611971
			1.41871	1.36377	0.661681		0.939462	1.42147	0.680851		1.24647	1.30689	0.612378
			1.41916	1.36651	0.662121		0.941121	1.42162	0.681304		1.24817	1.30713	0.612785
			1.41929	1.36684	0.66256		0.94113	1.42437	0.681756		1.24909	1.30815	0.613192
			1.42025	1.36727	0.663		0.941445	1.42474	0.682209		1.25042	1.30845	0.613599
			1.42199	1.36748	0.66344		0.942153	1.4248	0.682662		1.25264	1.30944	0.614007
			1.42299	1.36821	0.66388		0.94232	1.42782	0.683115		1.25573	1.30982	0.614414
			1.42416	1.36858	0.66432		0.942558	1.42847	0.683567		1.25628	1.31087	0.614821
			1.42491	1.37019	0.66476		0.942645	1.43012	0.68402		1.25711	1.3129	0.615228
			1.43047	1.37251	0.6652		0.943512	1.43095	0.684473		1.25717	1.31329	0.615635
			1.43151	1.37357	0.66564		0.944014	1.43172	0.684925		1.25735	1.3142	0.616042
			1.43484	1.37561	0.66608		0.946339	1.43208	0.685378		1.25751	1.31541	0.61645
			1.43498	1.37867	0.66652		0.946752	1.43255	0.685831		1.25953	1.31565	0.616857
			1.43501	1.38223	0.66696		0.948253	1.43314	0.686283		1.26114	1.31579	0.617264
			1.43544	1.38571	0.6674		0.948802	1.4342	0.686736		1.26202	1.31592	0.617671
			1.43687	1.3864	0.66784		0.949168	1.43548	0.687189		1.26417	1.31704	0.618078
			1.43751	1.3868	0.66828		0.949227	1.43625	0.687641		1.2645	1.32025	0.618485
			1.43786	1.38739	0.66872		0.949658	1.43883	0.688094		1.26505	1.32092	0.618893
			1.43806	1.39079	0.66916		0.949776	1.43932	0.688547		1.26522	1.3211	0.6193
			1.43818	1.39108	0.6696		0.950796	1.43932	0.689		1.26556	1.32346	0.619707
			1.4389	1.39125	0.67004		0.951372	1.44025	0.689452		1.26599	1.32473	0.620114
			1.43963	1.39376	0.67048		0.952292	1.44088	0.689905		1.26721	1.3275	0.620521
			1.44099	1.39738	0.670919		0.953252	1.44197	0.690358		1.26752	1.32789	0.620928
			1.45221	1.39807	0.671359		0.953488	1.44311	0.69081		1.26756	1.32793	0.621336
			1.45298	1.40192	0.671799		0.954526	1.44332	0.691263		1.26772	1.32806	0.621743
			1.4533	1.40226	0.672239		0.955111	1.44351	0.691716		1.26814	1.32835	0.62215
			1.45349	1.40572	0.672679		0.957306	1.4437	0.692168		1.26905	1.32975	0.622557
			1.45527	1.40671	0.673119		0.958402	1.44519	0.692621		1.26958	1.33163	0.622964
			1.4566	1.40747	0.673559		0.959206	1.44548	0.693074		1.27114	1.33279	0.623371
			1.45678	1.40944	0.673999		0.959453	1.44609	0.693526		1.27187	1.3329	0.623779
			1.45785	1.41145	0.674439		0.960191	1.45022	0.693979		1.27204	1.3337	0.624186
			1.4602	1.41174	0.674879		0.9612	1.45063	0.694432		1.27385	1.3339	0.624593
			1.46085	1.41647	0.675319		0.96303	1.45231	0.694885		1.2774	1.33423	0.625
			1.4614	1.42075	0.675759		0.963643	1.45354	0.695337		1.27991	1.33475	0.625407
			1.46148	1.42119	0.676199		0.965197	1.45418	0.69579		1.28015	1.33475	0.625814
			1.46217	1.42561	0.676639		0.965215	1.45531	0.696243		1.28214	1.33604	0.626221
			1.46265	1.42595	0.677079		0.96525	1.45605	0.696695		1.28296	1.33616	0.626629
			1.46285	1.4262	0.677519		0.968229	1.45734	0.697148		1.28347	1.33696	0.627036
			1.46396	1.42735	0.677959		0.968327	1.45736	0.697601		1.28469	1.33729	0.627443
			1.46574	1.42838	0.678399		0.968392	1.45967	0.698053		1.28551	1.33759	0.62785
			1.46684	1.42867	0.678839		0.969121	1.4603	0.698506		1.2871	1.33765	0.628257
			1.46743	1.42895	0.679278		0.969582	1.46069	0.698959		1.28782	1.33934	0.628664
			1.4695	1.42918	0.679718		0.969603	1.46104	0.699411		1.28836	1.33992	0.629072
			1.46965	1.43034	0.680158		0.969649	1.46223	0.699864		1.28914	1.33994	0.629479
			1.47171	1.43247	0.680598		0.970091	1.46255	0.700317		1.28924	1.34016	0.629886
			1.47183	1.43713	0.681038		0.971094	1.46394	0.70077		1.29009	1.34068	0.630293
			1.47406	1.43728	0.681478		0.972163	1.46402	0.701222		1.29117	1.34129	0.6307
			1.48069	1.4378	0.681918		0.972783	1.46485	0.701675		1.29309	1.34207	0.631107
			1.48187	1.43875	0.682358		0.972823	1.46498	0.702128		1.2942	1.34292	0.631515
			1.4844	1.43985	0.682798		0.974015	1.46575	0.70258		1.29504	1.3434	0.631922
			1.48466	1.44106	0.683238		0.974125	1.46831	0.703033		1.2961	1.3435	0.632329
			1.48689	1.44711	0.683678		0.976779	1.47121	0.703486		1.29681	1.34595	0.632736
			1.49137	1.44906	0.684118		0.978113	1.47186	0.703938		1.29733	1.3461	0.633143
			1.49361	1.44978	0.684558		0.978391	1.47204	0.704391		1.29876	1.3484	0.63355
			1.49629	1.44995	0.684998		0.978563	1.47481	0.704844		1.30107	1.34867	0.633958
			1.49722	1.45162	0.685438		0.979403	1.47531	0.705297		1.30185	1.34893	0.634365
			1.4983	1.45215	0.685878		0.979687	1.47538	0.705749		1.30303	1.34979	0.634772
			1.49865	1.45253	0.686318		0.981312	1.47551	0.706202		1.30476	1.35076	0.635179
			1.49965	1.45503	0.686758		0.981542	1.47592	0.706655		1.30671	1.35157	0.635586
			1.50009	1.45608	0.687198		0.981598	1.47876	0.707107		1.30704	1.352	0.635993
			1.50373	1.45699	0.687637		0.981731	1.47966	0.70756		1.30717	1.35296	0.636401
			1.50402	1.46311	0.688077		0.982649	1.48017	0.708013		1.30817	1.35404	0.636808
			1.50469	1.4644	0.688517		0.98288	1.48281	0.708465		1.31086	1.35408	0.637215
			1.50876	1.46566	0.688957		0.984298	1.48303	0.708918		1.31173	1.35422	0.637622
			1.50947	1.46745	0.689397		0.985136	1.48317	0.709371		1.31315	1.35449	0.638029
			1.51112	1.46917	0.689837		0.985675	1.48318	0.709823		1.31457	1.35567	0.638436
			1.51311	1.46951	0.690277		0.985817	1.48391	0.710276		1.31539	1.35715	0.638844
			1.51445	1.46983	0.690717		0.986116	1.48531	0.710729		1.31561	1.3572	0.639251
			1.5156	1.46992	0.691157		0.987997	1.48828	0.711182		1.31616	1.35728	0.639658
			1.5177	1.46993	0.691597		0.988713	1.49023	0.711634		1.31646	1.35801	0.640065
			1.51841	1.47138	0.692037		0.988898	1.4962	0.712087		1.31687	1.3581	0.640472
			1.52139	1.47466	0.692477		0.990354	1.49624	0.71254		1.31694	1.35822	0.640879
			1.52169	1.47517	0.692917		0.990673	1.49643	0.712992		1.31727	1.35863	0.641287
			1.52236	1.47769	0.693357		0.990801	1.49664	0.713445		1.31914	1.35952	0.641694
			1.52431	1.48064	0.693797		0.991238	1.49982	0.713898		1.32142	1.3606	0.642101
			1.52578	1.48369	0.694237		0.991789	1.50161	0.71435		1.32214	1.36303	0.642508
			1.52604	1.48411	0.694677		0.992306	1.50279	0.714803		1.32331	1.36382	0.642915
			1.52694	1.4871	0.695117		0.992543	1.50482	0.715256		1.32744	1.3643	0.643322
			1.5289	1.48998	0.695557		0.994607	1.50628	0.715708		1.32772	1.3655	0.64373
			1.53485	1.49043	0.695996		0.995146	1.50672	0.716161		1.32803	1.36616	0.644137
			1.53849	1.49277	0.696436		0.99568	1.50762	0.716614		1.32997	1.3664	0.644544
			1.53867	1.49283	0.696876		0.995965	1.50797	0.717067		1.33035	1.36656	0.644951
			1.54349	1.49354	0.697316		0.996457	1.5084	0.717519		1.33101	1.36859	0.645358
			1.54369	1.49545	0.697756		0.997155	1.51014	0.717972		1.33139	1.36915	0.645765
			1.54432	1.49607	0.698196		0.997674	1.51051	0.718425		1.33288	1.37027	0.646173
			1.54454	1.49661	0.698636		0.997955	1.5111	0.718877		1.33417	1.37098	0.64658
			1.54478	1.49731	0.699076		0.998343	1.51111	0.71933		1.33446	1.37104	0.646987
			1.54565	1.50542	0.699516		0.998379	1.51259	0.719783		1.33541	1.37129	0.647394
			1.5495	1.5085	0.699956		0.998566	1.51331	0.720235		1.33548	1.37147	0.647801
			1.54977	1.50882	0.700396		0.999153	1.51335	0.720688		1.33604	1.37174	0.648208
			1.55286	1.50973	0.700836		1.00016	1.51648	0.721141		1.33963	1.37246	0.648616
			1.55523	1.5136	0.701276		1.00026	1.51698	0.721593		1.3401	1.37321	0.649023
			1.56177	1.51427	0.701716		1.00185	1.517	0.722046		1.342	1.37339	0.64943
			1.56193	1.51834	0.702156		1.00254	1.51827	0.722499		1.34335	1.37513	0.649837
			1.56258	1.51994	0.702596		1.00267	1.519	0.722952		1.34452	1.37683	0.650244
			1.56297	1.52	0.703036		1.00312	1.51954	0.723404		1.34772	1.37899	0.650651
			1.56422	1.52074	0.703476		1.00422	1.52159	0.723857		1.35095	1.38158	0.651059
			1.56486	1.5238	0.703916		1.00569	1.52164	0.72431		1.35253	1.38243	0.651466
			1.56495	1.52435	0.704355		1.0057	1.52744	0.724762		1.35317	1.38279	0.651873
			1.56674	1.52496	0.704795		1.00631	1.52954	0.725215		1.35406	1.38398	0.65228
			1.56878	1.52553	0.705235		1.00706	1.53089	0.725668		1.35503	1.38398	0.652687
			1.57373	1.52878	0.705675		1.00856	1.53154	0.72612		1.35667	1.38424	0.653094
			1.57736	1.52887	0.706115		1.00899	1.53275	0.726573		1.35668	1.38455	0.653502
			1.5784	1.52895	0.706555		1.01071	1.53296	0.727026		1.35904	1.38476	0.653909
			1.57875	1.53124	0.706995		1.01128	1.53474	0.727478		1.35964	1.38492	0.654316
			1.58184	1.53158	0.707435		1.01249	1.53649	0.727931		1.36034	1.38546	0.654723
			1.5848	1.53365	0.707875		1.01378	1.53691	0.728384		1.36111	1.38607	0.65513
			1.58484	1.53386	0.708315		1.01387	1.53758	0.728837		1.36236	1.38661	0.655537
			1.58658	1.53509	0.708755		1.01493	1.53783	0.729289		1.36379	1.38703	0.655945
			1.58723	1.53579	0.709195		1.01534	1.53792	0.729742		1.36423	1.38777	0.656352
			1.59033	1.53616	0.709635		1.01613	1.53884	0.730195		1.36425	1.38853	0.656759
			1.59439	1.53849	0.710075		1.01664	1.5397	0.730647		1.36439	1.38921	0.657166
			1.59586	1.53915	0.710515		1.01713	1.54104	0.7311		1.36483	1.38956	0.657573
			1.59656	1.53916	0.710955		1.018	1.54187	0.731553		1.36736	1.39035	0.65798
			1.59715	1.5399	0.711395		1.01887	1.54202	0.732005		1.3677	1.39547	0.658388
			1.59839	1.54034	0.711835		1.0191	1.54321	0.732458		1.37026	1.39738	0.658795
			1.60273	1.54265	0.712275		1.02098	1.54335	0.732911		1.37079	1.40082	0.659202
			1.60396	1.54874	0.712714		1.0218	1.54337	0.733364		1.37118	1.40164	0.659609
			1.60549	1.54938	0.713154		1.02309	1.54366	0.733816		1.37297	1.40172	0.660016
			1.60554	1.55184	0.713594		1.02372	1.54378	0.734269		1.37406	1.40273	0.660423
			1.6068	1.55254	0.714034		1.02654	1.54422	0.734722		1.37421	1.40519	0.660831
			1.60707	1.55681	0.714474		1.02813	1.5446	0.735174		1.377	1.40533	0.661238
			1.60714	1.55712	0.714914		1.02898	1.54529	0.735627		1.37786	1.40682	0.661645
			1.60892	1.55781	0.715354		1.02905	1.54668	0.73608		1.37947	1.40756	0.662052
			1.61019	1.55852	0.715794		1.02979	1.54744	0.736532		1.37984	1.40953	0.662459
			1.61035	1.55942	0.716234		1.0299	1.5485	0.736985		1.38097	1.40991	0.662866
			1.61075	1.55942	0.716674		1.03058	1.54911	0.737438		1.38503	1.41201	0.663274
			1.61217	1.56194	0.717114		1.03101	1.54964	0.73789		1.38725	1.414	0.663681
			1.61238	1.56354	0.717554		1.03124	1.55159	0.738343		1.38855	1.41852	0.664088
			1.61474	1.564	0.717994		1.03203	1.55674	0.738796		1.38948	1.4198	0.664495
			1.61498	1.56505	0.718434		1.03295	1.55694	0.739249		1.38995	1.42134	0.664902
			1.61596	1.56535	0.718874		1.03352	1.5592	0.739701		1.39334	1.42256	0.665309
			1.62015	1.56595	0.719314		1.03391	1.55988	0.740154		1.39459	1.4228	0.665717
			1.62101	1.56604	0.719754		1.03442	1.55996	0.740607		1.39549	1.42323	0.666124
			1.62124	1.56621	0.720194		1.03466	1.56049	0.741059		1.3958	1.42339	0.666531
			1.62213	1.56637	0.720634		1.03749	1.56351	0.741512		1.40155	1.42712	0.666938
			1.62637	1.56795	0.721073		1.03981	1.56364	0.741965		1.40229	1.42774	0.667345
			1.63189	1.5683	0.721513		1.04007	1.56588	0.742417		1.40577	1.42843	0.667752
			1.63636	1.56857	0.721953		1.04178	1.56742	0.74287		1.40661	1.43076	0.66816
			1.6366	1.56949	0.722393		1.04187	1.56819	0.743323		1.40693	1.43126	0.668567
			1.64262	1.57028	0.722833		1.04322	1.56837	0.743775		1.40764	1.43128	0.668974
			1.64363	1.57047	0.723273		1.04497	1.56968	0.744228		1.4086	1.43293	0.669381
			1.64648	1.57072	0.723713		1.04572	1.56995	0.744681		1.40879	1.434	0.669788
			1.64655	1.57102	0.724153		1.04655	1.57091	0.745134		1.40897	1.43426	0.670195
			1.64894	1.57136	0.724593		1.04775	1.57187	0.745586		1.41123	1.4351	0.670603
			1.65097	1.57294	0.725033		1.04897	1.57241	0.746039		1.41279	1.43574	0.67101
			1.65134	1.5737	0.725473		1.04985	1.57488	0.746492		1.41282	1.43599	0.671417
			1.65398	1.57472	0.725913		1.05037	1.57925	0.746944		1.41581	1.43703	0.671824
			1.65558	1.57473	0.726353		1.05107	1.57962	0.747397		1.41602	1.44684	0.672231
			1.65897	1.57785	0.726793		1.05368	1.58226	0.74785		1.41607	1.44739	0.672638
			1.66059	1.58013	0.727233		1.05373	1.58299	0.748302		1.41667	1.44942	0.673046
			1.66185	1.58407	0.727673		1.05512	1.58381	0.748755		1.41757	1.44973	0.673453
			1.66237	1.58614	0.728113		1.0557	1.584	0.749208		1.41952	1.45281	0.67386
			1.66331	1.58753	0.728553		1.05578	1.5856	0.74966		1.42136	1.45359	0.674267
			1.66463	1.58936	0.728993		1.05759	1.58781	0.750113		1.42164	1.45392	0.674674
			1.66463	1.59455	0.729432		1.05899	1.58851	0.750566		1.42236	1.45492	0.675081
			1.66524	1.59527	0.729872		1.0591	1.59119	0.751019		1.4233	1.45502	0.675489
			1.66673	1.59574	0.730312		1.05986	1.59314	0.751471		1.42599	1.45517	0.675896
			1.66689	1.59699	0.730752		1.06071	1.59338	0.751924		1.42713	1.4565	0.676303
			1.66708	1.60149	0.731192		1.06166	1.59963	0.752377		1.42719	1.45716	0.67671
			1.67498	1.60157	0.731632		1.06201	1.60038	0.752829		1.4297	1.4582	0.677117
			1.67659	1.60406	0.732072		1.06203	1.60745	0.753282		1.43191	1.45974	0.677524
			1.68213	1.60514	0.732512		1.06252	1.60955	0.753735		1.43197	1.4603	0.677932
			1.68217	1.60524	0.732952		1.06362	1.61065	0.754187		1.43232	1.46164	0.678339
			1.68237	1.60797	0.733392		1.06382	1.61399	0.75464		1.43237	1.46174	0.678746
			1.68386	1.60877	0.733832		1.06484	1.61576	0.755093		1.43385	1.46289	0.679153
			1.68442	1.61279	0.734272		1.06624	1.61792	0.755545		1.43431	1.46386	0.67956
			1.68486	1.61543	0.734712		1.06624	1.61822	0.755998		1.43495	1.46613	0.679967
			1.68537	1.61561	0.735152		1.06719	1.62282	0.756451		1.43838	1.46648	0.680375
			1.688	1.61568	0.735592		1.06826	1.62314	0.756904		1.43978	1.467	0.680782
			1.6895	1.61778	0.736032		1.06951	1.62517	0.757356		1.43996	1.46865	0.681189
			1.6923	1.62151	0.736472		1.06971	1.62651	0.757809		1.44014	1.46916	0.681596
			1.69764	1.62179	0.736912		1.06992	1.63181	0.758262		1.44076	1.46918	0.682003
			1.70211	1.62444	0.737352		1.07074	1.63196	0.758714		1.4422	1.46982	0.68241
			1.70271	1.62627	0.737791		1.07109	1.6333	0.759167		1.44331	1.47298	0.682818
			1.70708	1.63028	0.738231		1.07209	1.63562	0.75962		1.44408	1.47303	0.683225
			1.70856	1.63092	0.738671		1.07296	1.63687	0.760072		1.44438	1.47563	0.683632
			1.7096	1.63575	0.739111		1.07468	1.63742	0.760525		1.44495	1.47595	0.684039
			1.71359	1.63613	0.739551		1.07573	1.63848	0.760978		1.44498	1.47872	0.684446
			1.71383	1.63746	0.739991		1.07615	1.63883	0.761431		1.44566	1.48246	0.684853
			1.71482	1.63947	0.740431		1.07628	1.63905	0.761883		1.4461	1.48265	0.685261
			1.71485	1.63956	0.740871		1.07669	1.63962	0.762336		1.44681	1.48312	0.685668
			1.71562	1.63976	0.741311		1.07788	1.63975	0.762789		1.44709	1.48414	0.686075
			1.71564	1.6398	0.741751		1.07801	1.64406	0.763241		1.44823	1.48422	0.686482
			1.71744	1.6412	0.742191		1.07831	1.64673	0.763694		1.45049	1.48492	0.686889
			1.71844	1.64197	0.742631		1.07939	1.64896	0.764147		1.45082	1.48736	0.687296
			1.71925	1.64456	0.743071		1.08104	1.65046	0.764599		1.45196	1.48819	0.687704
			1.72117	1.6469	0.743511		1.08312	1.65368	0.765052		1.45324	1.49032	0.688111
			1.72149	1.65512	0.743951		1.08389	1.65392	0.765505		1.45402	1.49169	0.688518
			1.72225	1.65583	0.744391		1.08412	1.6541	0.765957		1.45524	1.49211	0.688925
			1.72245	1.65885	0.744831		1.08435	1.65786	0.76641		1.45561	1.49451	0.689332
			1.72522	1.65993	0.745271		1.08491	1.6596	0.766863		1.45618	1.49505	0.689739
			1.72762	1.66058	0.745711		1.08641	1.66018	0.767316		1.45618	1.49525	0.690147
			1.72816	1.66265	0.74615		1.08671	1.66043	0.767768		1.45626	1.49578	0.690554
			1.73189	1.66894	0.74659		1.08715	1.66065	0.768221		1.45678	1.49616	0.690961
			1.73347	1.66981	0.74703		1.08763	1.66124	0.768674		1.45876	1.49769	0.691368
			1.73423	1.6723	0.74747		1.08898	1.66125	0.769126		1.46151	1.49914	0.691775
			1.73579	1.67747	0.74791		1.08999	1.66274	0.769579		1.46465	1.50026	0.692182
			1.73694	1.68626	0.74835		1.09037	1.66281	0.770032		1.46518	1.5009	0.69259
			1.73885	1.68822	0.74879		1.09102	1.66317	0.770484		1.46534	1.50123	0.692997
			1.74041	1.6891	0.74923		1.09119	1.66384	0.770937		1.46658	1.50231	0.693404
			1.74063	1.68931	0.74967		1.09359	1.66392	0.77139		1.46786	1.5033	0.693811
			1.74223	1.68999	0.75011		1.09453	1.66443	0.771842		1.46817	1.50345	0.694218
			1.74463	1.69007	0.75055		1.09512	1.66878	0.772295		1.4687	1.50422	0.694625
			1.74584	1.6907	0.75099		1.09661	1.67145	0.772748		1.46874	1.50446	0.695033
			1.74688	1.69943	0.75143		1.09721	1.67351	0.773201		1.47141	1.50649	0.69544
			1.74724	1.70023	0.75187		1.09825	1.674	0.773653		1.47192	1.50693	0.695847
			1.74771	1.7011	0.75231		1.09847	1.67457	0.774106		1.47242	1.50781	0.696254
			1.75047	1.70482	0.75275		1.1005	1.67534	0.774559		1.4745	1.50807	0.696661
			1.75253	1.70545	0.75319		1.10185	1.67567	0.775011		1.47622	1.50811	0.697068
			1.75371	1.70898	0.75363		1.10203	1.67642	0.775464		1.4778	1.51027	0.697476
			1.7561	1.71077	0.75407		1.10323	1.67685	0.775917		1.48078	1.51031	0.697883
			1.75997	1.71101	0.754509		1.1038	1.67935	0.776369		1.48082	1.51395	0.69829
			1.76297	1.71139	0.754949		1.10619	1.67946	0.776822		1.48161	1.51586	0.698697
			1.76818	1.71344	0.755389		1.10671	1.6826	0.777275		1.48185	1.51806	0.699104
			1.77217	1.71369	0.755829		1.10743	1.68329	0.777727		1.48326	1.52109	0.699511
			1.77423	1.71454	0.756269		1.10905	1.68337	0.77818		1.48484	1.52237	0.699919
			1.77452	1.72135	0.756709		1.10979	1.68646	0.778633		1.48705	1.52383	0.700326
			1.77707	1.72268	0.757149		1.11148	1.6868	0.779086		1.48935	1.5244	0.700733
			1.77889	1.72286	0.757589		1.11166	1.68829	0.779538		1.49235	1.52449	0.70114
			1.78272	1.72368	0.758029		1.11358	1.69011	0.779991		1.4934	1.52542	0.701547
			1.78816	1.72485	0.758469		1.11433	1.69278	0.780444		1.49392	1.52646	0.701954
			1.78878	1.72563	0.758909		1.11478	1.69302	0.780896		1.49392	1.52713	0.702362
			1.79405	1.72663	0.759349		1.11614	1.69409	0.781349		1.49615	1.52749	0.702769
			1.8005	1.72812	0.759789		1.11713	1.69498	0.781802		1.49677	1.52859	0.703176
			1.80266	1.72847	0.760229		1.11739	1.69605	0.782254		1.50059	1.529	0.703583
			1.80448	1.73215	0.760669		1.1174	1.69673	0.782707		1.50353	1.53097	0.70399
			1.80516	1.7327	0.761109		1.11764	1.69746	0.78316		1.50719	1.53124	0.704397
			1.80679	1.73335	0.761549		1.11808	1.69846	0.783612		1.51088	1.53293	0.704805
			1.80799	1.74167	0.761989		1.11917	1.70091	0.784065		1.5111	1.53517	0.705212
			1.80807	1.74228	0.762429		1.11969	1.70119	0.784518		1.51238	1.53632	0.705619
			1.80869	1.74274	0.762868		1.12114	1.70216	0.784971		1.51312	1.53705	0.706026
			1.80881	1.74536	0.763308		1.12207	1.70615	0.785423		1.51473	1.53714	0.706433
			1.80948	1.74607	0.763748		1.12334	1.71258	0.785876		1.51827	1.53727	0.70684
			1.81306	1.74681	0.764188		1.12422	1.71269	0.786329		1.51874	1.53893	0.707248
			1.81337	1.74683	0.764628		1.1249	1.71298	0.786781		1.51999	1.53944	0.707655
			1.81688	1.74823	0.765068		1.12506	1.71567	0.787234		1.52003	1.54074	0.708062
			1.81809	1.74873	0.765508		1.12643	1.71746	0.787687		1.52106	1.54085	0.708469
			1.81857	1.7507	0.765948		1.12786	1.71832	0.788139		1.52254	1.54203	0.708876
			1.82078	1.75126	0.766388		1.12858	1.71992	0.788592		1.5254	1.54251	0.709283
			1.82134	1.75248	0.766828		1.12878	1.72112	0.789045		1.52859	1.54651	0.709691
			1.82149	1.75399	0.767268		1.12884	1.72155	0.789498		1.53124	1.54972	0.710098
			1.82187	1.75773	0.767708		1.12993	1.72168	0.78995		1.5316	1.55087	0.710505
			1.82357	1.76279	0.768148		1.12995	1.72339	0.790403		1.53297	1.55121	0.710912
			1.82433	1.76331	0.768588		1.1303	1.72673	0.790856		1.53322	1.55186	0.711319
			1.82745	1.76485	0.769028		1.13047	1.72845	0.791308		1.53398	1.55234	0.711726
			1.82971	1.76716	0.769468		1.13062	1.73143	0.791761		1.53485	1.55336	0.712134
			1.83016	1.77452	0.769908		1.13486	1.73305	0.792214		1.53585	1.55451	0.712541
			1.83114	1.77483	0.770348		1.13487	1.73368	0.792666		1.53668	1.55992	0.712948
			1.83137	1.7752	0.770788		1.13552	1.73431	0.793119		1.53829	1.5607	0.713355
			1.83369	1.77658	0.771227		1.13561	1.73492	0.793572		1.53882	1.56107	0.713762
			1.83711	1.77762	0.771667		1.13569	1.73677	0.794024		1.53978	1.5633	0.714169
			1.83852	1.78061	0.772107		1.13597	1.73971	0.794477		1.54006	1.56475	0.714577
			1.83943	1.7818	0.772547		1.13716	1.74425	0.79493		1.54025	1.56507	0.714984
			1.84142	1.78187	0.772987		1.13773	1.74604	0.795383		1.54224	1.5678	0.715391
			1.84247	1.78227	0.773427		1.13781	1.74619	0.795835		1.54333	1.57166	0.715798
			1.84311	1.78361	0.773867		1.13839	1.74637	0.796288		1.5469	1.57236	0.716205
			1.84374	1.78512	0.774307		1.14041	1.74711	0.796741		1.5489	1.57316	0.716612
			1.84509	1.78875	0.774747		1.14231	1.74716	0.797193		1.55137	1.57321	0.71702
			1.84564	1.78927	0.775187		1.14367	1.74868	0.797646		1.55176	1.57545	0.717427
			1.85074	1.7915	0.775627		1.14467	1.74909	0.798099		1.55281	1.57549	0.717834
			1.85861	1.79215	0.776067		1.14562	1.74922	0.798551		1.55317	1.57552	0.718241
			1.86527	1.79227	0.776507		1.14634	1.75136	0.799004		1.55334	1.57916	0.718648
			1.86574	1.79617	0.776947		1.14718	1.75243	0.799457		1.55339	1.57937	0.719055
			1.86799	1.79883	0.777387		1.14816	1.75376	0.799909		1.55426	1.57949	0.719463
			1.86886	1.79925	0.777827		1.14847	1.75682	0.800362		1.55521	1.57969	0.71987
			1.86941	1.80323	0.778267		1.14904	1.76034	0.800815		1.55748	1.58033	0.720277
			1.87113	1.80539	0.778707		1.14995	1.76249	0.801268		1.5581	1.58069	0.720684
			1.87155	1.80704	0.779147		1.15014	1.76256	0.80172		1.55856	1.58129	0.721091
			1.87651	1.81098	0.779586		1.15098	1.76936	0.802173		1.5589	1.58282	0.721498
			1.87745	1.81125	0.780026		1.15134	1.77379	0.802626		1.5616	1.58423	0.721906
			1.87777	1.81282	0.780466		1.15188	1.77608	0.803078		1.5616	1.58513	0.722313
			1.8782	1.81415	0.780906		1.15234	1.77788	0.803531		1.56259	1.58701	0.72272
			1.87874	1.81443	0.781346		1.15271	1.77938	0.803984		1.56277	1.58926	0.723127
			1.8832	1.82098	0.781786		1.15354	1.78065	0.804436		1.56436	1.59099	0.723534
			1.88755	1.8219	0.782226		1.15425	1.782	0.804889		1.56531	1.59112	0.723941
			1.88937	1.82245	0.782666		1.15696	1.78204	0.805342		1.57122	1.59245	0.724349
			1.88959	1.8249	0.783106		1.15876	1.78342	0.805794		1.57238	1.59404	0.724756
			1.89082	1.8289	0.783546		1.15879	1.78358	0.806247		1.57265	1.59682	0.725163
			1.89135	1.8292	0.783986		1.1597	1.78843	0.8067		1.57397	1.59824	0.72557
			1.89617	1.83185	0.784426		1.16007	1.78958	0.807153		1.57469	1.59847	0.725977
			1.89714	1.83281	0.784866		1.16147	1.78961	0.807605		1.57522	1.59849	0.726384
			1.90798	1.83367	0.785306		1.16165	1.79009	0.808058		1.57547	1.60007	0.726792
			1.90886	1.83497	0.785746		1.16192	1.7909	0.808511		1.57644	1.60134	0.727199
			1.90889	1.83509	0.786186		1.1631	1.79136	0.808963		1.57705	1.60297	0.727606
			1.9091	1.83837	0.786626		1.16347	1.79359	0.809416		1.5777	1.6041	0.728013
			1.91073	1.84203	0.787066		1.1635	1.79994	0.809869		1.57818	1.60448	0.72842
			1.92081	1.84663	0.787505		1.16367	1.8014	0.810321		1.57885	1.6056	0.728827
			1.92485	1.84713	0.787945		1.16462	1.80173	0.810774		1.57949	1.60764	0.729235
			1.92496	1.84788	0.788385		1.16602	1.80295	0.811227		1.58007	1.60937	0.729642
			1.92972	1.8503	0.788825		1.16639	1.80314	0.811679		1.58223	1.61167	0.730049
			1.93394	1.85217	0.789265		1.16655	1.80361	0.812132		1.58333	1.61242	0.730456
			1.93425	1.85377	0.789705		1.16675	1.80492	0.812585		1.58535	1.61336	0.730863
			1.93876	1.85567	0.790145		1.16698	1.8067	0.813038		1.58619	1.61445	0.73127
			1.94568	1.8569	0.790585		1.16798	1.80693	0.81349		1.58632	1.61454	0.731678
			1.94764	1.85696	0.791025		1.17159	1.81209	0.813943		1.58711	1.61543	0.732085
			1.94989	1.85738	0.791465		1.17282	1.81298	0.814396		1.58848	1.61593	0.732492
			1.9541	1.85768	0.791905		1.17298	1.81367	0.814848		1.58989	1.6168	0.732899
			1.95501	1.85884	0.792345		1.1733	1.81479	0.815301		1.59024	1.61803	0.733306
			1.95533	1.85966	0.792785		1.17552	1.81876	0.815754		1.59027	1.61812	0.733713
			1.95751	1.86695	0.793225		1.17677	1.81955	0.816206		1.59345	1.6211	0.734121
			1.95816	1.87096	0.793665		1.17712	1.82072	0.816659		1.59371	1.62114	0.734528
			1.95995	1.87134	0.794105		1.17789	1.82076	0.817112		1.59486	1.62458	0.734935
			1.96042	1.87175	0.794545		1.17791	1.82101	0.817565		1.59529	1.62477	0.735342
			1.96333	1.87384	0.794985		1.17872	1.82101	0.818017		1.59779	1.62521	0.735749
			1.96722	1.87398	0.795425		1.17975	1.82255	0.81847		1.59783	1.62705	0.736156
			1.96732	1.87751	0.795864		1.18179	1.82693	0.818923		1.59795	1.62825	0.736564
			1.97181	1.87779	0.796304		1.18738	1.82724	0.819375		1.59975	1.62879	0.736971
			1.97192	1.88588	0.796744		1.18939	1.82853	0.819828		1.59981	1.63049	0.737378
			1.9721	1.88607	0.797184		1.19114	1.82908	0.820281		1.6003	1.6315	0.737785
			1.97292	1.88911	0.797624		1.19124	1.83224	0.820733		1.60076	1.6337	0.738192
			1.97437	1.88983	0.798064		1.19233	1.83568	0.821186		1.60116	1.63441	0.738599
			1.97537	1.89138	0.798504		1.195	1.8358	0.821639		1.6018	1.63466	0.739007
			1.97704	1.89514	0.798944		1.19964	1.83732	0.822091		1.60275	1.64068	0.739414
			1.98024	1.89525	0.799384		1.20298	1.83745	0.822544		1.60539	1.64212	0.739821
			1.98037	1.8977	0.799824		1.20357	1.83899	0.822997		1.60661	1.64536	0.740228
			1.98165	1.89772	0.800264		1.20362	1.84008	0.82345		1.60684	1.64538	0.740635
			1.98193	1.89897	0.800704		1.20531	1.8407	0.823902		1.60705	1.64575	0.741042
			1.99069	1.90208	0.801144		1.21078	1.84072	0.824355		1.60902	1.64831	0.74145
			1.99161	1.9032	0.801584		1.21148	1.84094	0.824808		1.60977	1.64847	0.741857
			1.99224	1.90678	0.802024		1.21217	1.84229	0.82526		1.61176	1.64967	0.742264
			1.99316	1.90717	0.802464		1.21287	1.84252	0.825713		1.61311	1.65265	0.742671
			1.99394	1.90805	0.802904		1.21436	1.84473	0.826166		1.6134	1.65344	0.743078
			1.99417	1.91293	0.803344		1.21497	1.84493	0.826618		1.61381	1.65362	0.743485
			1.9975	1.91453	0.803784		1.21541	1.84529	0.827071		1.61482	1.65399	0.743893
			1.99886	1.91471	0.804223		1.21572	1.84545	0.827524		1.61566	1.65424	0.7443
			1.99947	1.9169	0.804663		1.21758	1.84669	0.827976		1.61618	1.65578	0.744707
			2.00348	1.91716	0.805103		1.21759	1.84862	0.828429		1.61634	1.65586	0.745114
			2.0089	1.92374	0.805543		1.21782	1.84971	0.828882		1.61851	1.65787	0.745521
			2.00893	1.92466	0.805983		1.21852	1.85103	0.829335		1.62001	1.65831	0.745928
			2.00938	1.92819	0.806423		1.21933	1.85245	0.829787		1.62035	1.65907	0.746336
			2.01162	1.92824	0.806863		1.22263	1.85248	0.83024		1.6216	1.66242	0.746743
			2.02008	1.92856	0.807303		1.22269	1.85483	0.830693		1.62202	1.66249	0.74715
			2.02011	1.93072	0.807743		1.22356	1.85937	0.831145		1.62288	1.66283	0.747557
			2.02118	1.93099	0.808183		1.22361	1.8613	0.831598		1.62827	1.66505	0.747964
			2.02727	1.93161	0.808623		1.22411	1.86255	0.832051		1.62983	1.66667	0.748371
			2.02896	1.93223	0.809063		1.22502	1.86441	0.832503		1.63024	1.66671	0.748779
			2.03	1.94092	0.809503		1.22503	1.86606	0.832956		1.6313	1.66704	0.749186
			2.0305	1.94225	0.809943		1.22773	1.87227	0.833409		1.63177	1.66743	0.749593
			2.03295	1.94295	0.810383		1.23077	1.87873	0.833861		1.63481	1.66802	0.75
			2.03306	1.94689	0.810823		1.231	1.88444	0.834314		1.63692	1.66886	0.750407
			2.03431	1.94813	0.811263		1.2315	1.88641	0.834767		1.63873	1.67038	0.750814
			2.03518	1.94938	0.811703		1.23196	1.88676	0.83522		1.63898	1.6712	0.751221
			2.04081	1.95102	0.812143		1.23238	1.88909	0.835672		1.6432	1.67125	0.751629
			2.04425	1.95123	0.812582		1.23544	1.89103	0.836125		1.64498	1.67172	0.752036
			2.04824	1.95207	0.813022		1.23705	1.89142	0.836578		1.64546	1.67241	0.752443
			2.04872	1.95435	0.813462		1.23812	1.89249	0.83703		1.64559	1.6729	0.75285
			2.04992	1.95461	0.813902		1.23866	1.89277	0.837483		1.64836	1.67625	0.753257
			2.05104	1.95859	0.814342		1.24436	1.89994	0.837936		1.65067	1.67759	0.753664
			2.05124	1.95897	0.814782		1.24498	1.90139	0.838388		1.65098	1.67928	0.754072
			2.05179	1.96045	0.815222		1.24618	1.90285	0.838841		1.65285	1.68352	0.754479
			2.05524	1.96079	0.815662		1.2475	1.90315	0.839294		1.65583	1.68643	0.754886
			2.06081	1.96149	0.816102		1.24759	1.90342	0.839746		1.65662	1.68673	0.755293
			2.06171	1.96199	0.816542		1.24889	1.90541	0.840199		1.65731	1.68943	0.7557
			2.06479	1.96364	0.816982		1.24916	1.90596	0.840652		1.65789	1.69096	0.756107
			2.0667	1.96368	0.817422		1.24931	1.90617	0.841105		1.65992	1.69327	0.756515
			2.07093	1.96507	0.817862		1.25202	1.9144	0.841557		1.6617	1.6948	0.756922
			2.072	1.96549	0.818302		1.25365	1.91592	0.84201		1.66185	1.69576	0.757329
			2.07242	1.9708	0.818742		1.25531	1.91705	0.842463		1.66303	1.70187	0.757736
			2.08135	1.97104	0.819182		1.25739	1.91964	0.842915		1.66424	1.70246	0.758143
			2.08767	1.97468	0.819622		1.25758	1.91969	0.843368		1.66887	1.70296	0.75855
			2.08777	1.97726	0.820062		1.2581	1.92082	0.843821		1.67518	1.70373	0.758958
			2.09075	1.97872	0.820502		1.25975	1.92145	0.844273		1.67596	1.70379	0.759365
			2.09298	1.98604	0.820941		1.26082	1.92578	0.844726		1.67652	1.70479	0.759772
			2.09943	1.98647	0.821381		1.26443	1.92759	0.845179		1.6775	1.70722	0.760179
			2.1052	1.98715	0.821821		1.26497	1.93609	0.845632		1.67813	1.71181	0.760586
			2.106	1.98832	0.822261		1.26502	1.93719	0.846084		1.67834	1.71298	0.760993
			2.10643	1.99091	0.822701		1.2651	1.94494	0.846537		1.68047	1.71361	0.761401
			2.11459	1.99274	0.823141		1.26823	1.94537	0.84699		1.68443	1.71383	0.761808
			2.11848	2.00235	0.823581		1.27128	1.94566	0.847442		1.68508	1.71423	0.762215
			2.11936	2.0031	0.824021		1.27388	1.94844	0.847895		1.68511	1.71651	0.762622
			2.12245	2.00644	0.824461		1.275	1.9496	0.848348		1.68788	1.71697	0.763029
			2.12784	2.00658	0.824901		1.27684	1.95006	0.8488		1.68831	1.71778	0.763436
			2.12787	2.0069	0.825341		1.27697	1.95198	0.849253		1.68919	1.7182	0.763844
			2.13014	2.00729	0.825781		1.27876	1.9533	0.849706		1.68927	1.71854	0.764251
			2.14105	2.00742	0.826221		1.28081	1.95666	0.850158		1.68942	1.71889	0.764658
			2.14257	2.00746	0.826661		1.28145	1.95816	0.850611		1.6909	1.71942	0.765065
			2.14416	2.00929	0.827101		1.2826	1.96306	0.851064		1.69194	1.72059	0.765472
			2.14776	2.00961	0.827541		1.28323	1.96582	0.851517		1.69299	1.72069	0.765879
			2.14916	2.00982	0.827981		1.28334	1.96712	0.851969		1.69369	1.72144	0.766287
			2.15003	2.01118	0.828421		1.28355	1.96759	0.852422		1.69481	1.72392	0.766694
			2.15068	2.01197	0.828861		1.28697	1.9691	0.852875		1.69708	1.72458	0.767101
			2.15319	2.01599	0.8293		1.28874	1.97186	0.853327		1.69733	1.72493	0.767508
			2.15456	2.01913	0.82974		1.28882	1.9725	0.85378		1.69935	1.72697	0.767915
			2.1552	2.02203	0.83018		1.28965	1.97585	0.854233		1.70118	1.72844	0.768322
			2.15561	2.02774	0.83062		1.29314	1.98111	0.854685		1.70283	1.73089	0.76873
			2.15834	2.03067	0.83106		1.29372	1.98684	0.855138		1.70393	1.73195	0.769137
			2.16072	2.03527	0.8315		1.2955	1.9871	0.855591		1.70454	1.73254	0.769544
			2.16105	2.03645	0.83194		1.29586	1.98714	0.856043		1.70485	1.73371	0.769951
			2.16129	2.04135	0.83238		1.29856	1.98814	0.856496		1.7055	1.73409	0.770358
			2.16201	2.04236	0.83282		1.29963	1.98863	0.856949		1.70566	1.73438	0.770765
			2.16276	2.04692	0.83326		1.30069	1.98918	0.857402		1.70773	1.73443	0.771173
			2.16467	2.04945	0.8337		1.30291	1.99032	0.857854		1.70775	1.73483	0.77158
			2.16675	2.05133	0.83414		1.30295	1.99154	0.858307		1.71051	1.73575	0.771987
			2.17524	2.05207	0.83458		1.3042	1.9932	0.85876		1.71169	1.73788	0.772394
			2.17879	2.0575	0.83502		1.30523	1.99562	0.859212		1.71286	1.74389	0.772801
			2.18071	2.05821	0.83546		1.30592	1.99811	0.859665		1.71293	1.74412	0.773208
			2.18436	2.05858	0.8359		1.307	1.99941	0.860118		1.71481	1.7445	0.773616
			2.18854	2.06262	0.83634		1.30703	1.99975	0.86057		1.71915	1.74538	0.774023
			2.19258	2.06301	0.83678		1.31019	1.99977	0.861023		1.71938	1.74626	0.77443
			2.19394	2.07465	0.83722		1.3128	2.00156	0.861476		1.71942	1.74818	0.774837
			2.19514	2.07619	0.837659		1.31483	2.00299	0.861928		1.72026	1.7499	0.775244
			2.19528	2.07775	0.838099		1.31527	2.01085	0.862381		1.72078	1.7501	0.775651
			2.19705	2.07811	0.838539		1.31938	2.01366	0.862834		1.72153	1.75392	0.776059
			2.19787	2.08008	0.838979		1.3226	2.01511	0.863287		1.72276	1.75426	0.776466
			2.19987	2.08678	0.839419		1.32581	2.01805	0.863739		1.72485	1.75551	0.776873
			2.20547	2.0908	0.839859		1.3263	2.01957	0.864192		1.72963	1.75898	0.77728
			2.2055	2.09192	0.840299		1.32801	2.02002	0.864645		1.73034	1.75915	0.777687
			2.20602	2.09248	0.840739		1.32866	2.02027	0.865097		1.73189	1.75971	0.778094
			2.21089	2.09397	0.841179		1.32877	2.02537	0.86555		1.73388	1.75975	0.778502
			2.21107	2.09734	0.841619		1.32942	2.02738	0.866003		1.73553	1.76216	0.778909
			2.21166	2.09768	0.842059		1.33159	2.03022	0.866455		1.73676	1.76293	0.779316
			2.21265	2.11426	0.842499		1.33236	2.03236	0.866908		1.73781	1.76298	0.779723
			2.21937	2.11686	0.842939		1.33456	2.03681	0.867361		1.74459	1.7639	0.78013
			2.22029	2.11864	0.843379		1.33482	2.04072	0.867813		1.74826	1.76503	0.780537
			2.22747	2.11894	0.843819		1.33696	2.043	0.868266		1.751	1.76609	0.780945
			2.22899	2.11928	0.844259		1.33834	2.04316	0.868719		1.75636	1.77278	0.781352
			2.24266	2.12219	0.844699		1.33888	2.04625	0.869172		1.75668	1.7753	0.781759
			2.2428	2.12334	0.845139		1.34064	2.04887	0.869624		1.75823	1.77823	0.782166
			2.24371	2.12463	0.845579		1.34187	2.04919	0.870077		1.75971	1.77833	0.782573
			2.24444	2.1261	0.846018		1.34406	2.05103	0.87053		1.75984	1.77917	0.78298
			2.2461	2.12758	0.846458		1.35106	2.05121	0.870982		1.76041	1.77929	0.783388
			2.24758	2.13147	0.846898		1.35141	2.05482	0.871435		1.76087	1.77997	0.783795
			2.24762	2.13759	0.847338		1.35567	2.05571	0.871888		1.76263	1.78158	0.784202
			2.24833	2.14011	0.847778		1.3564	2.05696	0.87234		1.77164	1.78332	0.784609
			2.25316	2.1435	0.848218		1.35673	2.06084	0.872793		1.77179	1.78546	0.785016
			2.25683	2.14427	0.848658		1.35912	2.06186	0.873246		1.77278	1.78603	0.785423
			2.25741	2.14501	0.849098		1.36096	2.06624	0.873699		1.77331	1.7873	0.785831
			2.25841	2.15149	0.849538		1.36153	2.06742	0.874151		1.77419	1.79244	0.786238
			2.25947	2.15161	0.849978		1.36179	2.07076	0.874604		1.77562	1.79333	0.786645
			2.26041	2.16198	0.850418		1.36183	2.07284	0.875057		1.77584	1.79348	0.787052
			2.26107	2.1638	0.850858		1.36447	2.07475	0.875509		1.7762	1.7939	0.787459
			2.26136	2.16441	0.851298		1.36943	2.07821	0.875962		1.77737	1.79557	0.787866
			2.26456	2.16461	0.851738		1.36948	2.08223	0.876415		1.77762	1.79719	0.788274
			2.26518	2.16585	0.852178		1.36979	2.09139	0.876867		1.77846	1.79936	0.788681
			2.26683	2.1659	0.852618		1.37025	2.09405	0.87732		1.77878	1.79992	0.789088
			2.26791	2.16622	0.853058		1.37192	2.09558	0.877773		1.78171	1.80213	0.789495
			2.26874	2.17089	0.853498		1.37293	2.09577	0.878225		1.78503	1.80339	0.789902
			2.26994	2.1713	0.853938		1.37581	2.09732	0.878678		1.78504	1.80379	0.790309
			2.27081	2.17293	0.854377		1.37734	2.09872	0.879131		1.79052	1.80505	0.790717
			2.27935	2.17344	0.854817		1.37811	2.10099	0.879584		1.79081	1.80562	0.791124
			2.29594	2.17587	0.855257		1.38167	2.10309	0.880036		1.79467	1.80583	0.791531
			2.30389	2.17798	0.855697		1.38707	2.10596	0.880489		1.79537	1.80678	0.791938
			2.30833	2.18046	0.856137		1.39024	2.10717	0.880942		1.79805	1.80726	0.792345
			2.31004	2.18596	0.856577		1.39207	2.10759	0.881394		1.80015	1.8085	0.792752
			2.3102	2.18609	0.857017		1.39382	2.1092	0.881847		1.80264	1.81055	0.79316
			2.31244	2.18972	0.857457		1.39668	2.10922	0.8823		1.80511	1.81127	0.793567
			2.31349	2.1899	0.857897		1.39784	2.10976	0.882752		1.81401	1.81535	0.793974
			2.31372	2.19091	0.858337		1.40055	2.11101	0.883205		1.81626	1.81654	0.794381
			2.32219	2.19099	0.858777		1.40113	2.11277	0.883658		1.81654	1.81743	0.794788
			2.32245	2.19239	0.859217		1.40293	2.11306	0.88411		1.81811	1.819	0.795195
			2.32299	2.19418	0.859657		1.40551	2.11682	0.884563		1.81825	1.81943	0.795603
			2.32656	2.19886	0.860097		1.40682	2.11725	0.885016		1.81963	1.81958	0.79601
			2.33531	2.20001	0.860537		1.40683	2.1197	0.885469		1.82131	1.81997	0.796417
			2.33673	2.20005	0.860977		1.40847	2.13106	0.885921		1.82201	1.82031	0.796824
			2.33887	2.20269	0.861417		1.40947	2.13158	0.886374		1.8239	1.82111	0.797231
			2.33908	2.20654	0.861857		1.41033	2.13694	0.886827		1.82475	1.82244	0.797638
			2.34151	2.2071	0.862297		1.41239	2.14015	0.887279		1.82541	1.82336	0.798046
			2.34174	2.20801	0.862736		1.4139	2.14705	0.887732		1.82666	1.82378	0.798453
			2.34465	2.21188	0.863176		1.41441	2.14772	0.888185		1.82958	1.82394	0.79886
			2.34856	2.21222	0.863616		1.41778	2.15681	0.888637		1.83069	1.82527	0.799267
			2.34899	2.21292	0.864056		1.42001	2.15833	0.88909		1.83098	1.82601	0.799674
			2.35119	2.21683	0.864496		1.42003	2.15911	0.889543		1.83106	1.82673	0.800081
			2.35681	2.22248	0.864936		1.4202	2.15913	0.889995		1.83211	1.82706	0.800489
			2.35818	2.22663	0.865376		1.42026	2.16238	0.890448		1.83397	1.82875	0.800896
			2.36195	2.23638	0.865816		1.42275	2.16244	0.890901		1.83539	1.83068	0.801303
			2.36842	2.23696	0.866256		1.42472	2.17093	0.891354		1.83676	1.83242	0.80171
			2.36882	2.23791	0.866696		1.42605	2.1748	0.891806		1.83951	1.83405	0.802117
			2.37704	2.23887	0.867136		1.42723	2.17892	0.892259		1.84074	1.83502	0.802524
			2.3817	2.24792	0.867576		1.42774	2.18026	0.892712		1.84194	1.83528	0.802932
			2.38619	2.25059	0.868016		1.42865	2.18151	0.893164		1.84264	1.83655	0.803339
			2.38739	2.25242	0.868456		1.43276	2.18666	0.893617		1.84457	1.83726	0.803746
			2.38772	2.26	0.868896		1.43297	2.1924	0.89407		1.84856	1.83774	0.804153
			2.39103	2.26811	0.869336		1.43347	2.19402	0.894522		1.84946	1.84055	0.80456
			2.39202	2.26899	0.869776		1.43641	2.1964	0.894975		1.85044	1.84785	0.804967
			2.40201	2.27144	0.870216		1.43786	2.19985	0.895428		1.85836	1.84792	0.805375
			2.40274	2.27432	0.870656		1.43838	2.20494	0.89588		1.85884	1.84949	0.805782
			2.40953	2.27497	0.871095		1.44261	2.20575	0.896333		1.86002	1.85173	0.806189
			2.40962	2.27922	0.871535		1.44274	2.21162	0.896786		1.86233	1.8546	0.806596
			2.40992	2.28323	0.871975		1.44507	2.21464	0.897239		1.863	1.85656	0.807003
			2.41292	2.28623	0.872415		1.4455	2.2194	0.897691		1.86406	1.85664	0.80741
			2.41727	2.28831	0.872855		1.447	2.22025	0.898144		1.86538	1.85993	0.807818
			2.42364	2.29158	0.873295		1.45056	2.22042	0.898597		1.86877	1.86321	0.808225
			2.42532	2.29212	0.873735		1.45057	2.22059	0.899049		1.87149	1.86416	0.808632
			2.4322	2.29278	0.874175		1.45338	2.22197	0.899502		1.8717	1.86555	0.809039
			2.43697	2.29663	0.874615		1.45355	2.22379	0.899955		1.87228	1.86829	0.809446
			2.44316	2.3095	0.875055		1.4558	2.22769	0.900407		1.87468	1.8688	0.809853
			2.44586	2.31262	0.875495		1.45597	2.22836	0.90086		1.87484	1.86981	0.810261
			2.44864	2.3154	0.875935		1.45603	2.22907	0.901313		1.87533	1.87332	0.810668
			2.45569	2.32322	0.876375		1.45652	2.24261	0.901766		1.88233	1.88023	0.811075
			2.4604	2.32416	0.876815		1.45786	2.24413	0.902218		1.88374	1.88248	0.811482
			2.4652	2.32668	0.877255		1.45816	2.24768	0.902671		1.88427	1.88942	0.811889
			2.47155	2.32736	0.877695		1.45904	2.24963	0.903124		1.88459	1.89327	0.812296
[truncated: 461 more rows]
