# Supplementary material for: Endocytic trafficking determines cellular tolerance of presynaptic opioid signaling
Source: eLife. 2022 Nov 15;11:e81298. doi: 10.7554/eLife.81298 (PMC9708073; doi:10.7554/eLife.81298)
Supplement: Figure 3—source data 1. [file elife-81298-fig3-data1.xlsx]

## Sheet: Panels B E G
Panel B												Panels E G
				Acute	DAMGO + DMSO	Morphine + DMSO	Morphine + Cmpd101								Acute	PZM + DMSO	PZM + Cmpd101	TRV + DMSO	TRV +Cmpd101
		ratio
		baseline/DAMGO		0.25467	0.538793	0.403376	0.241621						ratio		0.25467	0.211111	0.204647	0.297589	0.342601
													ttest MORA			0.372099	0.3054	0.37075	0.0914093
Ttest
MORA/MS DMSO		0.00181853		0.30049	0.560522	0.354581	0.253632								0.30049	0.217555	0.267969	0.297245	0.301951
MSDMSO/MS101		0.0015596		0.304386	0.708352	0.303989	0.462806								0.304386	0.26472	0.262289	0.436837	0.323026
MORA/MORDMSO		4.00381e-08		0.465007	0.270047	0.182557	0.240375								0.465007	0.320154	0.197974	0.210177	0.419013
				0.176398	0.428509	0.351926	0.166665								0.176398	0.314297	0.277942	0.338714	0.456455
				0.143182	0.692189	0.363765	0.00389715								0.143182	0.0951314	0.188142	0.222509	0.257302
				0.285835	0.496681	0.300441	0.475218								0.285835	0.165512	0.264913	0.33221	0.261054
				0.496858	0.373133	0.305748	0.133515								0.496858	0.208371	0.0273652	0.315545	0.379404
				0.341693	0.618876	0.541033	0.291017								0.341693	0.10315	0.150582	0.227472
				0.461279	0.698064	0.583038	0.0955974								0.461279
				0.245105	0.513797	0.370824	0.454939								0.245105
				0.31897	0.375732	0.594668	0.208601								0.31897
				0.237863	0.506159	0.471565	0.289418								0.237863
				0.261793	0.611747	0.245404	0.0672423								0.261793
				0.0592234	0.538203	0.493595	0.161589								0.0592234
				0.0445433	0.603262	0.71263	0.167398								0.0445433
				0.155658	0.540102	0.514395	0.188062								0.155658
				0.207181	0.624102	0.295611	0.167927								0.207181
				0.236624		0.334353	0.466024								0.236624
				0.17092		0.139281	0.296871								0.17092
				0.180385		0.696232									0.180385
						0.315259
													% Inhibition		Acute	PZM + DMSO	PZM + Cmpd101	TRV + DMSO	TRV +Cmpd101
	% Inhibition			Acute	DAMGO + DMSO	Morphine + DMSO	Morphine + Cmpd101								69.951	78.2445	73.2031	70.2755	69.8049
				69.951	43.9478	64.5419	74.6368								69.5614	73.528	73.7711	56.3163	67.6974
				69.5614	29.1648	69.6011	53.7194								53.4993	67.9846	80.2026	78.9823	58.0987
				53.4993	72.9953	81.7443	75.9625								82.3602	68.5703	72.2058	66.1286	54.3545
				82.3602	57.1491	64.8074	83.3335								85.6818	90.4869	81.1858	77.7491	74.2698
				85.6818	30.7811	63.6235	99.6103								71.4165	83.4488	73.5087	66.779	73.8946
				71.4165	50.3319	69.9559	52.4782								50.3142	79.1629	97.2635	68.4455	62.0596
				50.3142	62.6867	69.4252	86.6485								65.8307	89.685	84.9418	77.2528
				65.8307	38.1124	45.8967	70.8983								53.8721
				53.8721	30.1936	41.6962	90.4403								75.4895
				75.4895	48.6203	62.9176	54.5061								68.103
				68.103	62.4268	40.5332	79.1399								76.2137
				76.2137	49.3841	52.8435	71.0582								73.8207
				73.8207	38.8253	75.4596	93.2758								94.0777
				94.0777	46.1797	50.6405	83.8411								95.5457
				95.5457	39.6738	28.737	83.2602								84.4342
				84.4342	45.9898	48.5605	81.1938								79.2819
				79.2819	37.5898	70.4389	83.2073								76.3376
				76.3376		66.5647	53.3976								82.908
				82.908		86.0719	70.3129								81.9615
				81.9615		30.3768
						68.4741
Insets	MOR acute and DAMGO + DMSO reploted from fig 1- 2
		frame
Morphine + DMSO		-58	-57	-56	-55	-54	-53	-52	-51	-50	-49	-48	-47	-46	-45	-44	-43	-42	-41	-40	-39	-38	-37	-36	-35	-34	-33	-32	-31	-30	-29	-28	-27	-26	-25	-24	-23	-22	-21	-20	-19	-18	-17	-16	-15	-14	-13	-12	-11
Baseline		-0.0122041	-0.00961923	-0.0084311	-0.012784	-0.0125434	-0.0132388	-0.0101943	-0.012478	-0.0108415	-0.011409	-0.0113466	-0.00721566	-0.00794235	-0.0099343	-0.00926135	-0.00974014	-0.00981379	-0.0105319	-0.00788279	-0.0102808	-0.00983487	-0.00723031	-0.00881246	-0.0111371	-0.0105628	-0.00974263	-0.00897351	-0.00990304	-0.00943057	-0.0108521	-0.0112251	-0.00906633	-0.00647514	-0.00745194	-0.0086343	-0.00702292	-0.00730643	-0.00646446	-0.00849082	-0.00994302	-0.00594344	-0.00634674	-0.00494391	-0.00551012	-0.00342371	-0.00502776	-0.00374133	-0.00670008
Baseline SEM		0.00218887	0.00212104	0.0021021	0.00209523	0.00203621	0.00204162	0.00199945	0.0020117	0.00195377	0.00194148	0.00194188	0.00186645	0.00184583	0.00182836	0.00177614	0.00173438	0.00168779	0.00166867	0.00166712	0.00159682	0.00159747	0.00162533	0.00156118	0.00150861	0.00148764	0.00145475	0.00139986	0.00138682	0.00134951	0.00129925	0.00134461	0.00126935	0.00123504	0.00120465	0.00114527	0.00112859	0.00109098	0.00104822	0.00101654	0.000975021	0.000952446	0.000924761	0.000897355	0.000870512	0.000838976	0.000792984	0.000732782	0.000708395
DAMGO		0.0655213	0.0520687	0.0356849	0.0296346	0.0268113	0.0244713	0.0238755	0.0169816	0.0189142	0.0147469	0.0174471	0.0150892	0.0153601	0.0140276	0.0115582	0.00975215	0.00993576	0.00923189	0.00832741	0.0094875	0.012046	0.00914329	0.00803928	0.0121509	0.00785898	0.00598227	0.0113876	0.00856493	0.00840978	0.00816672	0.00369055	0.00649773	0.00452211	0.00660763	0.00830472	0.00206486	0.00630273	0.00632601	0.00117164	0.00929648	0.00474446	0.0033995	0.00110729	0.00630541	0.00339111	0.00625526	0.00268357	0.0033111
DAMGO SEM		0.00163865	0.00152501	0.00149814	0.00146516	0.00147955	0.00144506	0.00142573	0.00140046	0.00138592	0.00137079	0.00138038	0.00133986	0.00134082	0.00132341	0.00129538	0.00129992	0.00131184	0.00130615	0.00129129	0.00129096	0.00128048	0.00120371	0.00117973	0.00114821	0.00113601	0.0011057	0.00110579	0.00106512	0.00104474	0.00103751	0.00103239	0.000980961	0.000989665	0.000978313	0.000968813	0.000989036	0.000945732	0.000891253	0.000902935	0.000846789	0.000826932	0.000821655	0.000817267	0.000750848	0.00072774	0.000713118	0.000681557	0.000712808
Morphine + Cmpd101		-58	-57	-56	-55	-54	-53	-52	-51	-50	-49	-48	-47	-46	-45	-44	-43	-42	-41	-40	-39	-38	-37	-36	-35	-34	-33	-32	-31	-30	-29	-28	-27	-26	-25	-24	-23	-22	-21	-20	-19	-18	-17	-16	-15	-14	-13	-12	-11
Baseline		-0.000885742	-0.0010837	0.000727783	-0.00290311	0.000676737	-0.0030293	-0.00376641	-0.00600702	0.00173097	0.000824556	0.00578275	-0.0060036	-0.000323031	0.00341177	0.00216721	0.00201741	0.00323565	7.9213e-05	0.00268441	-0.0024571	-0.000229679	-0.00359421	0.00110499	0.00139877	0.000806117	-0.000524988	-0.00254404	0.00339349	-0.000568336	-0.000742282	-0.00147315	-0.00611857	-0.00199294	-0.00153093	0.000470025	-0.00484601	-0.00199326	-0.00168377	-0.000595344	-0.00216851	-0.00258221	-0.00402925	-0.000176547	-0.00132366	0.000242639	-0.00113381	-0.00342475	-0.00616572
Baseline SEM		0.00241126	0.00237418	0.00229406	0.00218958	0.00219161	0.0021901	0.0021299	0.00216308	0.0020722	0.00211953	0.00210447	0.00203113	0.00206187	0.00200953	0.00198579	0.00193193	0.00190375	0.00185535	0.00183339	0.0017809	0.00173248	0.00167518	0.00162361	0.00158951	0.00155758	0.00152304	0.0014393	0.00148404	0.00139424	0.00138242	0.00136267	0.00132739	0.00131977	0.00121145	0.0012537	0.0011881	0.0012108	0.00114248	0.00104937	0.00106094	0.00102097	0.0010429	0.00118044	0.00102246	0.000950251	0.000887141	0.000834147	0.00084422
DAMGO		0.0660487	0.0446136	0.035398	0.0228633	0.0197796	0.0121544	0.016281	0.0123461	0.0103932	0.00973462	0.0111892	0.0112684	0.0102554	0.00909548	0.0077653	0.00798194	0.00376173	0.0102921	0.00782263	0.00715863	0.00863457	0.00727938	0.00414832	0.00852391	0.0081779	0.00426389	0.000767272	0.00356293	0.000805568	0.00449102	0.00421735	-0.00273132	0.00284701	0.00473906	0.00336844	0.00410681	-0.000585969	-0.000792627	0.00303194	0.000832345	0.0026323	0.00186329	-0.000210025	0.000593541	0.00254812	0.00325637	-0.000149461	-0.00310637
DAMGO SEM		0.00196167	0.0018819	0.00181398	0.00187524	0.00182831	0.00177706	0.00177197	0.00169744	0.00174191	0.00169139	0.00171017	0.0017213	0.00164821	0.00161238	0.0015828	0.00158976	0.00158288	0.00155789	0.00151203	0.00152404	0.00148299	0.00149266	0.00146265	0.00143057	0.00141094	0.00139481	0.00141115	0.00141532	0.00131778	0.00131907	0.00133733	0.00128089	0.00127483	0.00127967	0.00127367	0.00120711	0.00117529	0.00119609	0.00115611	0.00107124	0.00112583	0.00107883	0.00105554	0.00102065	0.000945784	0.000941528	0.000880206	0.000900748
PSM21 + DMSO		-58	-57	-56	-55	-54	-53	-52	-51	-50	-49	-48	-47	-46	-45	-44	-43	-42	-41	-40	-39	-38	-37	-36	-35	-34	-33	-32	-31	-30	-29	-28	-27	-26	-25	-24	-23	-22	-21	-20	-19	-18	-17	-16	-15	-14	-13	-12	-11
Baseline		0.0152051	0.00832879	0.00489167	0.00872549	0.00631212	0.00517089	0.00643769	0.00675768	0.00625035	0.00872408	-0.0176337	0.0114387	0.00818537	0.00262972	-0.00038702	0.00290568	0.00823519	0.00184265	0.00246691	0.00132587	0.00304173	0.0037005	0.00199598	0.00324381	-0.000279848	0.00194343	0.00428272	0.00260054	0.00379374	0.000281373	0.00518375	0.000249506	-0.000693029	0.00115944	0.00357054	0.00555496	0.000324013	0.00165974	0.00419441	0.00201838	0.00212557	-0.000738365	-0.000968604	0.00251059	0.00155862	0.00299984	0.00205879	0.00121409
Baseline SEM		0.0045013	0.0043702	0.00426337	0.00423268	0.00419588	0.00410653	0.00399397	0.00390536	0.00392276	0.0038393	0.00400453	0.0037238	0.00366683	0.00358458	0.00346689	0.00346631	0.00345049	0.00340381	0.00331879	0.00326763	0.00317028	0.00311817	0.00296062	0.0029763	0.00288926	0.00286824	0.00275286	0.00266295	0.00273458	0.00261219	0.00255776	0.00242367	0.00243124	0.0023382	0.00227933	0.00227505	0.00230462	0.00215022	0.0021669	0.00203994	0.0020349	0.00181982	0.00172035	0.0016247	0.00160013	0.00153483	0.00156992	0.00142173
DAMGO		0.0941052	0.0609819	0.0462739	0.0325602	0.0248307	0.0185244	0.0201362	0.0172785	0.0178286	0.0156299	0.0169924	0.0177339	0.0131811	0.0149741	0.012079	0.00865954	0.00968598	0.0103368	0.00824461	0.000303724	-0.00143155	0.00211728	0.0067754	0.00357299	0.000813403	0.00406131	-0.000507804	-0.000264804	-0.00305803	0.00228732	-0.00038232	-0.00234941	0.000745884	0.00143075	0.00351342	-0.00469809	8.16738e-05	0.00143193	0.00220921	0.000933192	-0.0023486	-0.00520357	0.00220791	-0.000597568	-0.000587278	0.000736692	0.000747663	0.000126118
DAMGO SEM		0.00308244	0.00290874	0.00291268	0.00287887	0.00283297	0.00264445	0.00274581	0.0027182	0.00264612	0.00260408	0.00263396	0.00261278	0.00259372	0.00261336	0.0026172	0.00263887	0.00258072	0.00251414	0.00251271	0.00242201	0.00258127	0.00247497	0.00245743	0.00243509	0.00245051	0.00244976	0.00239604	0.00235683	0.00224928	0.00229367	0.00219973	0.00221006	0.00213755	0.00210515	0.00204519	0.0019368	0.00190233	0.00185181	0.00177822	0.00179691	0.00168744	0.00166447	0.00163599	0.00153214	0.00149172	0.00154471	0.0013421	0.00147027
PZM + Cmpd101		-58	-57	-56	-55	-54	-53	-52	-51	-50	-49	-48	-47	-46	-45	-44	-43	-42	-41	-40	-39	-38	-37	-36	-35	-34	-33	-32	-31	-30	-29	-28	-27	-26	-25	-24	-23	-22	-21	-20	-19	-18	-17	-16	-15	-14	-13	-12	-11
Baseline		0.0218289	0.0117519	0.00996439	0.00997936	0.0081807	0.00607634	0.00509252	0.00822	0.00418938	0.00552024	0.0050114	0.00182941	0.00162769	0.00415767	0.00584539	0.00482939	0.0045333	0.0088142	0.00404712	0.00237435	0.00389047	-0.000220905	-0.00168934	0.00177013	-0.00206602	0.0018711	-0.00315135	0.0040485	-0.00446812	8.22305e-05	0.000650872	4.07432e-05	0.000768589	0.00451455	0.00429821	-0.000353802	-0.00197815	0.000948416	-0.00226138	-0.000823682	-0.000800168	-0.00476494	-0.000831513	0.00178437	-0.00700141	0.00511473	0.00150145	-0.00180048
Baseline SEM		0.00492485	0.00479743	0.00469526	0.00475551	0.00462753	0.00459295	0.00450546	0.00444653	0.0044357	0.00437544	0.00438753	0.00428222	0.00419941	0.00409919	0.00408188	0.00402222	0.00385853	0.00382066	0.0037876	0.00378682	0.00367623	0.00364048	0.00359049	0.00348005	0.00341356	0.00332622	0.00323402	0.00311202	0.00320545	0.00307822	0.00299789	0.00297703	0.00289566	0.00291319	0.00296006	0.00275426	0.00257443	0.00268041	0.00260096	0.00243453	0.00239088	0.00227491	0.0022906	0.0021861	0.00213595	0.00197649	0.00196632	0.00170537
DAMGO		0.0951578	0.068252	0.0504406	0.0369427	0.0290073	0.0219456	0.0160784	0.018009	0.0188687	0.0163364	0.0156148	0.0187015	0.0132392	0.016471	0.0149898	0.0164786	0.013911	0.00711387	0.0139466	0.0143508	0.00725405	0.00770486	0.0107474	0.00834728	0.0106584	0.010214	-0.00274437	0.00666815	0.00165384	0.00310099	0.00821497	0.00843623	0.00809876	0.00167056	0.00494786	0.00810128	0.00763088	0.00823753	-0.00135931	0.000833841	-0.00276758	0.00112705	0.00592194	0.0010043	0.00414251	0.00326071	-0.000174889	-0.00588431
DAMGO SEM		0.00366878	0.00346463	0.00335118	0.00328463	0.00328958	0.00312985	0.00315234	0.00311289	0.0030411	0.00312831	0.00301417	0.0029188	0.00279382	0.00282482	0.00291953	0.00274615	0.00276977	0.00276576	0.00274302	0.00273752	0.00264284	0.00257838	0.00258501	0.00262449	0.00256592	0.00256895	0.00270695	0.00240307	0.00233069	0.00225424	0.00228628	0.00216294	0.00218647	0.00211475	0.00211385	0.00210816	0.00200659	0.00199139	0.00205563	0.00201123	0.0019073	0.00182436	0.00182218	0.00179733	0.00172193	0.0018206	0.00179349	0.00169501
TRV130 + DMSO		-58	-57	-56	-55	-54	-53	-52	-51	-50	-49	-48	-47	-46	-45	-44	-43	-42	-41	-40	-39	-38	-37	-36	-35	-34	-33	-32	-31	-30	-29	-28	-27	-26	-25	-24	-23	-22	-21	-20	-19	-18	-17	-16	-15	-14	-13	-12	-11
Baseline		-0.00587261	-0.00909726	-0.0079189	-0.0108342	-0.00591234	-0.00936961	-0.0111013	-0.0101742	-0.0111008	-0.0124731	-0.00690195	-0.0106925	-0.00720767	-0.00987931	-0.00658686	-0.0116894	-0.0180162	-0.00739961	-0.0091923	-0.0103674	-0.00717007	-0.00920301	-0.0100855	-0.00813769	-0.00994297	-0.00790659	-0.00776758	-0.0104895	-0.00784911	-0.00743626	-0.00756082	-0.0116044	-0.00873879	-0.00633523	-0.0100132	-0.00854626	-0.00828627	-0.00519193	-0.00756011	-0.00752381	-0.00753509	-0.00670237	-0.00200141	-0.00386097	-0.00361924	-0.00355482	-0.00593324	-0.00328577
Baseline SEM		0.00333569	0.00325392	0.00328421	0.00330822	0.0032062	0.00319583	0.00322263	0.00313058	0.00305197	0.00307938	0.00304181	0.00292265	0.00292548	0.00291331	0.00290957	0.00291214	0.00288579	0.0027095	0.00269424	0.00269378	0.00267065	0.00269287	0.00259466	0.00258583	0.00258042	0.00246469	0.00246344	0.00237113	0.00242358	0.00224344	0.00229044	0.00216294	0.00217116	0.0020331	0.00215739	0.00192639	0.00181555	0.00180729	0.00178155	0.0018423	0.00177394	0.00168492	0.00166485	0.00150062	0.00147022	0.00133779	0.00124558	0.0013346
DAMGO		0.0593127	0.040671	0.027004	0.0220112	0.0179822	0.0132639	0.0151787	0.0104223	0.0112704	0.00938288	0.010751	0.0113759	0.0143664	0.0113918	0.0094802	0.0126638	0.0106858	0.00952104	0.00967932	0.00822578	0.00537299	0.00180055	0.00705338	0.00761698	0.00700858	0.00843294	0.00713342	0.00567788	0.00379195	0.00416093	0.000787151	0.00501799	0.00417046	0.00258038	0.00202969	0.00279325	0.00631792	0.00251105	-0.000351371	0.000874212	0.00186036	0.000566266	-0.000171387	0.00242874	0.000652723	0.000363513	-0.00398161	-0.00255263
DAMGO SEM		0.00302359	0.00294426	0.00287692	0.00279603	0.00269963	0.00273581	0.00262834	0.00258555	0.00261777	0.00255156	0.00250349	0.00251536	0.00248274	0.00236875	0.00235005	0.00239407	0.00233881	0.00233961	0.00234959	0.00224777	0.00224969	0.00221988	0.00214483	0.00212463	0.0021812	0.00213375	0.00206703	0.00201232	0.00195028	0.001986	0.00193803	0.00191036	0.00183681	0.0018741	0.00179372	0.00175722	0.00174096	0.00167186	0.00155353	0.00149689	0.00152089	0.00147198	0.00140711	0.00129571	0.00122336	0.00119417	0.00115093	0.00112329
TRV130 + Cmpd101		-58	-57	-56	-55	-54	-53	-52	-51	-50	-49	-48	-47	-46	-45	-44	-43	-42	-41	-40	-39	-38	-37	-36	-35	-34	-33	-32	-31	-30	-29	-28	-27	-26	-25	-24	-23	-22	-21	-20	-19	-18	-17	-16	-15	-14	-13	-12	-11
Baseline		0.0316427	0.0269199	0.0231312	0.023681	0.0258757	0.0208213	0.0201956	0.014349	0.0150077	0.0152068	0.019407	0.0207175	0.0166829	0.0175236	0.0159345	0.0100578	0.016331	0.0149428	0.0152138	0.00816243	0.0115986	0.0057081	0.00724587	0.00690646	0.0053315	0.00724129	0.00457693	0.00551638	0.00687109	0.00474875	0.00408845	-0.000473761	0.00275027	0.000925322	0.00290661	0.00553368	0.0023461	0.00105623	0.00367859	-0.000179736	0.00156971	-0.00302026	0.00239086	-9.16843e-05	0.00443867	0.00322045	-0.00559414	0.00214131
Baseline SEM		0.00357459	0.0035705	0.00344717	0.00341278	0.00345347	0.00346345	0.00341948	0.00332076	0.00320677	0.00330318	0.00329748	0.00328528	0.00323878	0.00312204	0.00301249	0.00302129	0.0029119	0.00286011	0.00278055	0.00281708	0.00269617	0.00264289	0.00266824	0.00250187	0.00243049	0.0024361	0.00247546	0.00239604	0.00240018	0.00237401	0.00231061	0.00222901	0.00223297	0.00224627	0.00212092	0.00204482	0.00202207	0.00187454	0.00186953	0.00180162	0.00178578	0.00166209	0.00162999	0.0016268	0.00141789	0.00147084	0.00269721	0.0015385
DAMGO		0.0915902	0.0676861	0.0518538	0.0370625	0.0339367	0.0328153	0.0261664	0.024052	0.0191819	0.0235897	0.015893	0.0125796	0.0159983	0.016603	0.0157056	0.0109114	0.0150057	0.0143953	0.0173993	0.0157407	0.0118651	0.00717556	0.00914991	0.00956147	0.00835626	0.0085728	0.0097336	0.0028285	0.00513823	0.00630356	0.00617534	0.00572154	0.00519806	0.00469907	0.00280211	0.0110552	0.00733101	0.00674037	0.00278475	-3.85313e-05	0.00576164	0.00216127	0.00081053	0.00848645	0.00689117	0.00248519	0.00380428	-0.001272
DAMGO SEM		0.00258933	0.0025168	0.00241938	0.00238884	0.00234231	0.0023337	0.00225013	0.00217952	0.00218388	0.00216919	0.00217228	0.00220145	0.00225285	0.0022126	0.00222485	0.00213696	0.00213469	0.00209967	0.00211419	0.00207914	0.00211891	0.00214647	0.00199277	0.00197546	0.00189803	0.00190569	0.00189029	0.00185307	0.00194357	0.00190015	0.00186833	0.00181	0.00174264	0.00167305	0.00173573	0.00166691	0.00165874	0.0015699	0.00160685	0.0015644	0.00146485	0.0014358	0.00131497	0.00137208	0.00124307	0.00117527	0.00117325	0.0011315
[truncated: 72 more columns]

## Sheet: Panels A D F
Panels A D F										Panel D									Panel A									Panel F
	Vehicle	baseline	fr6-fr11	fr12-fr16	fr17-fr21	fr22-fr26	fr27-fr31	fr32-fr36		PZM 21	baseline	fr6-fr11	fr12-fr16	fr17-fr21	fr22-fr26	fr27-fr31	fr32-fr36		Morphine	baseline	fr6-fr11	fr12-fr16	fr17-fr21	fr22-fr26	fr27-fr31	fr32-fr36		TRV 130	baseline	fr6-fr11	fr12-fr16	fr17-fr21	fr22-fr26	fr27-fr31	fr32-fr36
	2839	1	0.941861	0.954246	0.930028	0.942332	0.924346	0.915202		3431	1	1.04677	1.06842	1.24812	1.13701	1.17248	1.28693		2842	1	1.05236	1.00763	1.05299	0.985264	0.987394	1.03648		3429	1	0.8487	0.901477	0.921189	0.828648	0.947681	0.89892
	2840	1	0.910746	0.955888	1.01649	1.01565	1.00727	0.996886		3432	1	1.01881	0.96695	1.0455	1.01306	0.967051	0.973813		2843	1	1.03559	1.09719	1.09179	1.14373	1.11102	1.20247		3430	1	1.08758	1.08587	1.08086	1.07666	1.1169	1.11313
	2914	1	0.959689	1.0407	1.21529	1.14593	0.973259	1.09791		3452	1	0.943868	0.937046	0.912397	0.94274	1.01311	1.05227		2844	1	1.01508	1.06793	1.02315	1.07579	1.03622	1.18901		3451	1	1.14395	1.06387	1.09108	1.10954	1.12243	0.97868
	2915	1	1.01588	1.02604	1.04858	1.01753	0.975431	0.995795		3454	1	0.998869	1.005	0.971646	1.08224	0.996614	0.94891		2911	1	0.99144	0.996171	0.998094	1.05917	1.25809	1.2272		3455	1	0.97908	0.981144	0.996837	1.03958	0.976282	0.988632
	3831	1	1.06588	1.05403	1.02892	0.959615	1.05658	1.09294		3491	1	1.05441	0.95108	0.992807	1.03702	1.00745	1.01386		2912	1	1.01487	1.0772	1.02737	1.05778	1.02023	1.04274		3492	1	1.19647	1.36015	1.30202	1.40532	1.32871	1.48062
																			2913	1	1.04709	1.18276	1.1773	1.13552	1.27685	1.26351
	bins	baseline	fr6-fr11	fr12-fr16	fr17-fr21	fr22-fr26	fr27-fr31	fr32-fr36		bins	baseline	fr6-fr11	fr12-fr16	fr17-fr21	fr22-fr26	fr27-fr31	fr32-fr36		2931	1	0.929153	0.788602	0.809026	0.890373	0.910227	0.775915		bins	baseline	fr6-fr11	fr12-fr16	fr17-fr21	fr22-fr26	fr27-fr31	fr32-fr36
	Average	1	0.978812	1.00618	1.04786	1.01621	0.987377	1.01975		Average	1	1.01255	0.985698	1.03409	1.04241	1.03134	1.05516		2932	1	1.02684	1.03525	1.1213	1.05277	1.13957	1.04732		Average	1	1.05116	1.0785	1.0784	1.09195	1.0984	1.092
	SEM	2.3499e-16	0.0247543	0.019081	0.0415985	0.0319318	0.0194936	0.0306548		SEM	2.18689e-16	0.0177389	0.0211017	0.0515183	0.0292298	0.0323505	0.0541617											SEM	2.14132e-16	0.0555831	0.0694012	0.0571108	0.0826595	0.0605275	0.0921481
																			bins	baseline	fr6-fr11	fr12-fr16	fr17-fr21	fr22-fr26	fr27-fr31	fr32-fr36
										ttest	Vehicle/PZM	0.350825	0.537634	0.857114	0.602986	0.32825	0.624561		Average	1	1.01405	1.03159	1.03763	1.05005	1.09245	1.09808		Ttest	Vehicle/TRV	0.318621	0.395049	0.709153	0.466521	0.157001	0.524492
																			SEM	1.15278e-16	0.0130548	0.0377994	0.0361887	0.0269805	0.042688	0.0525043
																			ttest	Vehicle/Morphine	0.231664	0.650132	0.870402	0.478722	0.113166	0.329991

## Sheet: Panel C
DMSO / DAMGO + DMSO reploted from Fig 2					Av	1.00609	1.19251			1.22586	1.12853
					Median	0.788383	0.945291			0.977133	0.927879
						Morphine + DMSO				Morphine + Cmpd101
					count	2076				2872
						Sep	mCh	Freq		Sep	mCh	Freq
						-0.669596	0.0574828	0.000481696		-1.07786	0.0541282	0.000348189
						-0.632711	0.0858376	0.000963391		-1.05064	0.0552332	0.000696379
						-0.598843	0.101684	0.00144509		-0.998766	0.0608053	0.00104457
						-0.449996	0.113822	0.00192678		-0.905724	0.0609252	0.00139276
						-0.426106	0.119679	0.00240848		-0.887305	0.0760023	0.00174095
						-0.398249	0.122046	0.00289017		-0.86462	0.0918183	0.00208914
						-0.397598	0.124676	0.00337187		-0.8438	0.101192	0.00243733
						-0.388201	0.134911	0.00385356		-0.774635	0.106103	0.00278552
						-0.366281	0.135154	0.00433526		-0.736266	0.114466	0.0031337
						-0.350126	0.138968	0.00481696		-0.706627	0.119746	0.00348189
						-0.347149	0.148622	0.00529865		-0.691595	0.123397	0.00383008
						-0.323602	0.149167	0.00578035		-0.650405	0.127283	0.00417827
						-0.314528	0.151442	0.00626204		-0.621179	0.128028	0.00452646
						-0.311628	0.152062	0.00674374		-0.540992	0.133821	0.00487465
						-0.296463	0.157642	0.00722543		-0.540399	0.135748	0.00522284
						-0.295406	0.164131	0.00770713		-0.533984	0.137717	0.00557103
						-0.278482	0.164826	0.00818882		-0.529011	0.138188	0.00591922
						-0.275328	0.165381	0.00867052		-0.496685	0.139351	0.00626741
						-0.264537	0.169161	0.00915222		-0.486917	0.144354	0.0066156
						-0.251703	0.173143	0.00963391		-0.486211	0.144772	0.00696379
						-0.238283	0.174141	0.0101156		-0.481686	0.145182	0.00731198
						-0.22893	0.178319	0.0105973		-0.473711	0.146377	0.00766017
						-0.226923	0.18538	0.011079		-0.468926	0.149256	0.00800836
						-0.226055	0.185856	0.0115607		-0.458144	0.152057	0.00835655
						-0.222235	0.189128	0.0120424		-0.444154	0.152671	0.00870474
						-0.221236	0.195504	0.0125241		-0.438945	0.153442	0.00905292
						-0.219183	0.195897	0.0130058		-0.428795	0.153685	0.00940111
						-0.217952	0.196136	0.0134875		-0.418185	0.156785	0.0097493
						-0.203844	0.198159	0.0139692		-0.416206	0.157632	0.0100975
						-0.203369	0.198762	0.0144509		-0.410504	0.160118	0.0104457
						-0.195345	0.198842	0.0149326		-0.407429	0.163919	0.0107939
						-0.189143	0.201334	0.0154143		-0.398495	0.165691	0.0111421
						-0.180069	0.205077	0.015896		-0.387819	0.167084	0.0114903
						-0.179874	0.205801	0.0163776		-0.382526	0.167583	0.0118384
						-0.17133	0.205916	0.0168593		-0.378324	0.168395	0.0121866
						-0.170701	0.205946	0.017341		-0.377354	0.169975	0.0125348
						-0.168909	0.207769	0.0178227		-0.369323	0.170797	0.012883
						-0.160668	0.208042	0.0183044		-0.361005	0.170994	0.0132312
						-0.155281	0.208408	0.0187861		-0.354027	0.174863	0.0135794
						-0.151875	0.21247	0.0192678		-0.345805	0.175671	0.0139276
						-0.150699	0.215535	0.0197495		-0.341429	0.176183	0.0142758
						-0.147392	0.216429	0.0202312		-0.341361	0.176905	0.014624
						-0.142713	0.216793	0.0207129		-0.337563	0.177698	0.0149721
						-0.139858	0.222478	0.0211946		-0.331978	0.178255	0.0153203
						-0.139774	0.225628	0.0216763		-0.328516	0.178498	0.0156685
						-0.139402	0.226624	0.022158		-0.324327	0.178588	0.0160167
						-0.137804	0.227614	0.0226397		-0.303127	0.184304	0.0163649
						-0.132298	0.228702	0.0231214		-0.296947	0.184455	0.0167131
						-0.121294	0.231042	0.0236031		-0.28354	0.185429	0.0170613
						-0.120117	0.231714	0.0240848		-0.281623	0.187055	0.0174095
						-0.116631	0.232696	0.0245665		-0.276826	0.189207	0.0177577
						-0.114809	0.234785	0.0250482		-0.273305	0.190791	0.0181058
						-0.113961	0.235429	0.0255299		-0.268211	0.191461	0.018454
						-0.111851	0.238298	0.0260116		-0.265822	0.19279	0.0188022
						-0.104085	0.239612	0.0264933		-0.263407	0.193991	0.0191504
						-0.102763	0.239843	0.026975		-0.261399	0.194932	0.0194986
						-0.101285	0.241931	0.0274566		-0.253219	0.195925	0.0198468
						-0.0959776	0.244558	0.0279383		-0.24457	0.199219	0.020195
						-0.0943658	0.245304	0.02842		-0.232066	0.200768	0.0205432
						-0.0856872	0.247326	0.0289017		-0.219523	0.20109	0.0208914
						-0.0750184	0.24832	0.0293834		-0.219292	0.202369	0.0212396
						-0.0727772	0.251929	0.0298651		-0.21917	0.203392	0.0215877
						-0.0725772	0.252883	0.0303468		-0.21335	0.203705	0.0219359
						-0.07253	0.253588	0.0308285		-0.206793	0.203886	0.0222841
						-0.0701982	0.255753	0.0313102		-0.20587	0.204527	0.0226323
						-0.0676176	0.256439	0.0317919		-0.198864	0.205158	0.0229805
						-0.0658328	0.258592	0.0322736		-0.187078	0.206903	0.0233287
						-0.0646448	0.25949	0.0327553		-0.182244	0.207054	0.0236769
						-0.0618078	0.261009	0.033237		-0.181702	0.208245	0.0240251
						-0.059515	0.262421	0.0337187		-0.180691	0.209902	0.0243733
						-0.054116	0.267654	0.0342004		-0.173648	0.211218	0.0247214
						-0.0514018	0.268928	0.0346821		-0.169283	0.211797	0.0250696
						-0.0493265	0.270846	0.0351638		-0.168161	0.213174	0.0254178
						-0.0492775	0.27194	0.0356455		-0.167913	0.214112	0.025766
						-0.0484943	0.273797	0.0361272		-0.167664	0.214134	0.0261142
						-0.0482101	0.274685	0.0366089		-0.164499	0.214572	0.0264624
						-0.0444393	0.275067	0.0370906		-0.163234	0.217167	0.0268106
						-0.0381535	0.27607	0.0375723		-0.152341	0.218787	0.0271588
						-0.036211	0.276348	0.0380539		-0.141178	0.21896	0.027507
						-0.0361504	0.276954	0.0385356		-0.137989	0.219804	0.0278552
						-0.0343928	0.276985	0.0390173		-0.132096	0.221623	0.0282033
						-0.0334714	0.27736	0.039499		-0.130252	0.22257	0.0285515
						-0.0283775	0.281414	0.0399807		-0.129587	0.226436	0.0288997
						-0.0273207	0.283186	0.0404624		-0.125133	0.226484	0.0292479
						-0.0261731	0.284354	0.0409441		-0.122577	0.227721	0.0295961
						-0.026078	0.28445	0.0414258		-0.1223	0.228539	0.0299443
						-0.0230717	0.288742	0.0419075		-0.120872	0.229511	0.0302925
						-0.0195271	0.289328	0.0423892		-0.119648	0.231393	0.0306407
						-0.0184122	0.289667	0.0428709		-0.113643	0.231823	0.0309889
						-0.0174629	0.290168	0.0433526		-0.11314	0.232741	0.031337
						-0.016437	0.291065	0.0438343		-0.112274	0.23348	0.0316852
						-0.0162305	0.291446	0.044316		-0.111275	0.23411	0.0320334
						-0.015861	0.292209	0.0447977		-0.110416	0.234377	0.0323816
						-0.0131781	0.293716	0.0452794		-0.109519	0.236039	0.0327298
						-0.0112298	0.294821	0.0457611		-0.109031	0.238253	0.033078
						-0.00859862	0.29553	0.0462428		-0.107685	0.239218	0.0334262
						-0.00770566	0.29628	0.0467245		-0.102288	0.240234	0.0337744
						-0.00406254	0.29633	0.0472062		-0.100878	0.241779	0.0341226
						-0.00210327	0.296963	0.0476879		-0.0998257	0.241783	0.0344708
						0.000537528	0.298192	0.0481696		-0.0997146	0.242132	0.0348189
						0.00493675	0.299251	0.0486513		-0.0990479	0.24282	0.0351671
						0.00609249	0.303236	0.0491329		-0.0942284	0.244621	0.0355153
						0.00652459	0.304442	0.0496146		-0.0924849	0.248858	0.0358635
						0.00771993	0.305416	0.0500963		-0.0922905	0.250775	0.0362117
						0.00903808	0.306162	0.050578		-0.086864	0.250804	0.0365599
						0.00939887	0.306511	0.0510597		-0.0849254	0.251993	0.0369081
						0.0104184	0.306616	0.0515414		-0.0824505	0.253398	0.0372563
						0.0107093	0.307659	0.0520231		-0.0812131	0.253666	0.0376045
						0.0109718	0.307933	0.0525048		-0.0810927	0.256535	0.0379526
						0.0122005	0.308251	0.0529865		-0.0779064	0.256784	0.0383008
						0.0126059	0.309793	0.0534682		-0.0774863	0.256841	0.038649
						0.0130378	0.311858	0.0539499		-0.0765278	0.258202	0.0389972
						0.0193854	0.311874	0.0544316		-0.0763606	0.2586	0.0393454
						0.0201978	0.312844	0.0549133		-0.0750848	0.258619	0.0396936
						0.0219756	0.313372	0.055395		-0.0747014	0.258796	0.0400418
						0.0221662	0.313375	0.0558767		-0.0725817	0.259126	0.04039
						0.022745	0.314097	0.0563584		-0.0636096	0.259308	0.0407382
						0.0235883	0.316614	0.0568401		-0.0602622	0.259463	0.0410864
						0.0237915	0.318326	0.0573218		-0.0599137	0.26011	0.0414345
						0.0238801	0.318411	0.0578035		-0.0585685	0.260736	0.0417827
						0.0261922	0.318532	0.0582852		-0.055458	0.262135	0.0421309
						0.0278524	0.319179	0.0587669		-0.054539	0.263654	0.0424791
						0.0291231	0.320126	0.0592486		-0.0536407	0.264532	0.0428273
						0.0305016	0.32016	0.0597303		-0.052232	0.264953	0.0431755
						0.0315325	0.321259	0.0602119		-0.0505629	0.267325	0.0435237
						0.0349875	0.321984	0.0606936		-0.0490226	0.268243	0.0438719
						0.0366757	0.322085	0.0611753		-0.0462309	0.269273	0.0442201
						0.0370976	0.323667	0.061657		-0.0433363	0.270861	0.0445682
						0.0378577	0.324564	0.0621387		-0.0424251	0.271168	0.0449164
						0.0394601	0.325056	0.0626204		-0.0410038	0.273616	0.0452646
						0.0398607	0.326071	0.0631021		-0.0394598	0.273652	0.0456128
						0.042546	0.326873	0.0635838		-0.0389257	0.275892	0.045961
						0.0447715	0.327081	0.0640655		-0.0385635	0.276369	0.0463092
						0.0448215	0.328762	0.0645472		-0.0361361	0.276442	0.0466574
						0.0452236	0.332785	0.0650289		-0.0308712	0.276583	0.0470056
						0.0466921	0.333222	0.0655106		-0.0268915	0.277007	0.0473538
						0.0488951	0.333699	0.0659923		-0.0250686	0.278249	0.0477019
						0.0524508	0.333952	0.066474		-0.0238459	0.278462	0.0480501
						0.0569345	0.334386	0.0669557		-0.0189454	0.279063	0.0483983
						0.0585061	0.334733	0.0674374		-0.0183194	0.279821	0.0487465
						0.0603542	0.3357	0.0679191		-0.0166099	0.281588	0.0490947
						0.0608556	0.33674	0.0684008		-0.01399	0.281674	0.0494429
						0.0611523	0.337187	0.0688825		-0.0101546	0.282166	0.0497911
						0.0620699	0.337406	0.0693642		-0.00647804	0.282215	0.0501393
						0.0630856	0.338243	0.0698459		-0.0055	0.282266	0.0504875
						0.0677138	0.338676	0.0703276		-0.000926642	0.282641	0.0508357
						0.0692773	0.339101	0.0708092		0.000408486	0.283906	0.0511838
						0.0696257	0.339973	0.0712909		0.00539435	0.284212	0.051532
						0.0709486	0.339979	0.0717726		0.006836	0.285385	0.0518802
						0.0764562	0.340334	0.0722543		0.00755773	0.285585	0.0522284
						0.0776955	0.342194	0.072736		0.00767411	0.286191	0.0525766
						0.0784666	0.342821	0.0732177		0.0103509	0.286351	0.0529248
						0.0800037	0.343395	0.0736994		0.0132477	0.286789	0.053273
						0.0808088	0.344594	0.0741811		0.0150902	0.287104	0.0536212
						0.0812527	0.34521	0.0746628		0.0239982	0.287404	0.0539694
						0.0822314	0.345823	0.0751445		0.0253418	0.287821	0.0543175
						0.0852373	0.346067	0.0756262		0.0275121	0.288883	0.0546657
						0.0865057	0.346101	0.0761079		0.0282966	0.289117	0.0550139
						0.0871698	0.346603	0.0765896		0.0284105	0.289728	0.0553621
						0.090787	0.347315	0.0770713		0.0317722	0.29013	0.0557103
						0.0912637	0.347364	0.077553		0.0343316	0.290538	0.0560585
						0.0926232	0.348229	0.0780347		0.0346477	0.291001	0.0564067
						0.0934486	0.348368	0.0785164		0.0348518	0.29196	0.0567549
						0.0956119	0.348924	0.0789981		0.0350371	0.292624	0.0571031
						0.0982211	0.350357	0.0794798		0.0365137	0.292876	0.0574513
						0.0992317	0.350782	0.0799615		0.0367457	0.292904	0.0577994
						0.0999629	0.352103	0.0804432		0.0378025	0.293388	0.0581476
						0.100595	0.352261	0.0809249		0.038641	0.293466	0.0584958
						0.102738	0.352399	0.0814066		0.0386548	0.293526	0.058844
						0.103599	0.353178	0.0818882		0.0389622	0.294098	0.0591922
						0.103695	0.353498	0.0823699		0.0390143	0.294239	0.0595404
						0.104323	0.355333	0.0828516		0.0436101	0.295718	0.0598886
						0.106981	0.355536	0.0833333		0.0436694	0.296615	0.0602368
						0.107783	0.356028	0.083815		0.0466462	0.297393	0.060585
						0.108467	0.356298	0.0842967		0.0498089	0.297694	0.0609331
						0.109827	0.356918	0.0847784		0.050433	0.300367	0.0612813
						0.112154	0.357174	0.0852601		0.0517773	0.300534	0.0616295
						0.112442	0.361583	0.0857418		0.0517773	0.301231	0.0619777
						0.11477	0.361812	0.0862235		0.0519182	0.301475	0.0623259
						0.11562	0.361854	0.0867052		0.0523005	0.302074	0.0626741
						0.115975	0.363418	0.0871869		0.0532257	0.30222	0.0630223
						0.116446	0.363784	0.0876686		0.0585174	0.303469	0.0633705
						0.117854	0.364805	0.0881503		0.0586136	0.304145	0.0637187
						0.118168	0.365612	0.088632		0.0587524	0.304224	0.0640669
						0.118777	0.366606	0.0891137		0.059161	0.304675	0.064415
						0.121204	0.367548	0.0895954		0.0605619	0.304775	0.0647632
						0.125524	0.367561	0.0900771		0.0610005	0.30565	0.0651114
						0.125727	0.368413	0.0905588		0.0644235	0.306831	0.0654596
						0.126948	0.368887	0.0910405		0.0649018	0.308822	0.0658078
						0.127001	0.369648	0.0915222		0.0675021	0.308898	0.066156
						0.128383	0.370966	0.0920039		0.0676398	0.30976	0.0665042
						0.129467	0.371029	0.0924855		0.0684696	0.31096	0.0668524
						0.130502	0.371479	0.0929672		0.068989	0.311519	0.0672006
						0.130851	0.373607	0.0934489		0.069038	0.3118	0.0675487
						0.133592	0.375824	0.0939306		0.0698965	0.313127	0.0678969
						0.133592	0.376645	0.0944123		0.0707125	0.313358	0.0682451
						0.134029	0.37886	0.094894		0.0711439	0.314134	0.0685933
						0.136195	0.379256	0.0953757		0.0745292	0.314448	0.0689415
						0.141192	0.379313	0.0958574		0.0757037	0.314915	0.0692897
						0.141469	0.380432	0.0963391		0.0778433	0.315433	0.0696379
						0.142239	0.380437	0.0968208		0.0822516	0.316585	0.0699861
						0.144091	0.38053	0.0973025		0.0839475	0.317577	0.0703343
						0.144834	0.3806	0.0977842		0.0867273	0.317754	0.0706825
						0.14597	0.382086	0.0982659		0.0884717	0.318441	0.0710306
						0.146541	0.384836	0.0987476		0.088979	0.318484	0.0713788
						0.14815	0.38532	0.0992293		0.0926509	0.319204	0.071727
						0.148567	0.386062	0.099711		0.0940363	0.320567	0.0720752
						0.148694	0.386268	0.100193		0.094857	0.32301	0.0724234
						0.150491	0.386551	0.100674		0.0950699	0.323442	0.0727716
						0.150496	0.386583	0.101156		0.0951533	0.323762	0.0731198
						0.153343	0.386671	0.101638		0.0951841	0.32431	0.073468
						0.158505	0.387451	0.102119		0.0959206	0.324754	0.0738162
						0.15869	0.388273	0.102601		0.0970271	0.324759	0.0741643
						0.159878	0.389923	0.103083		0.0972401	0.325702	0.0745125
						0.164236	0.390671	0.103565		0.0976735	0.325959	0.0748607
						0.164679	0.391775	0.104046		0.101158	0.327092	0.0752089
						0.165014	0.391908	0.104528		0.102508	0.327285	0.0755571
						0.165397	0.392265	0.10501		0.103434	0.327332	0.0759053
						0.166023	0.394245	0.105491		0.103784	0.327979	0.0762535
						0.167702	0.394412	0.105973		0.104928	0.328435	0.0766017
						0.168534	0.394738	0.106455		0.106307	0.328447	0.0769499
						0.168885	0.395232	0.106936		0.115049	0.328452	0.0772981
						0.168918	0.395911	0.107418		0.119067	0.328996	0.0776462
						0.17376	0.39642	0.1079		0.119954	0.329179	0.0779944
						0.176118	0.396429	0.108382		0.120669	0.329549	0.0783426
						0.176547	0.397161	0.108863		0.121187	0.330094	0.0786908
						0.177296	0.397397	0.109345		0.122227	0.330218	0.079039
						0.177877	0.397609	0.109827		0.124211	0.330255	0.0793872
						0.178215	0.39897	0.110308		0.124581	0.330323	0.0797354
						0.178253	0.399127	0.11079		0.125576	0.330551	0.0800836
						0.180219	0.399456	0.111272		0.127127	0.331887	0.0804318
						0.18074	0.399575	0.111753		0.127164	0.33319	0.0807799
						0.181829	0.400545	0.112235		0.127597	0.333752	0.0811281
						0.182435	0.400668	0.112717		0.127972	0.334214	0.0814763
						0.183847	0.400823	0.113198		0.128308	0.334403	0.0818245
						0.184024	0.400979	0.11368		0.128965	0.334653	0.0821727
						0.184248	0.40284	0.114162		0.133167	0.335909	0.0825209
						0.185678	0.405538	0.114644		0.134333	0.337086	0.0828691
						0.186483	0.408672	0.115125		0.136501	0.337356	0.0832173
						0.18684	0.408848	0.115607		0.137992	0.337453	0.0835655
						0.188811	0.410735	0.116089		0.138627	0.337855	0.0839136
						0.189309	0.411851	0.11657		0.139624	0.337874	0.0842618
						0.189448	0.412302	0.117052		0.139833	0.338131	0.08461
						0.19082	0.412789	0.117534		0.143504	0.338254	0.0849582
						0.190882	0.413062	0.118015		0.143753	0.339732	0.0853064
						0.192159	0.413214	0.118497		0.144171	0.339842	0.0856546
						0.194174	0.413478	0.118979		0.145158	0.34053	0.0860028
						0.194375	0.413611	0.119461		0.155417	0.340533	0.086351
						0.195717	0.413755	0.119942		0.156748	0.340712	0.0866992
						0.195805	0.414778	0.120424		0.156943	0.340876	0.0870474
						0.197187	0.415206	0.120906		0.159365	0.341636	0.0873955
						0.197318	0.417036	0.121387		0.16228	0.343357	0.0877437
						0.199538	0.417491	0.121869		0.162979	0.343377	0.0880919
						0.200451	0.417698	0.122351		0.16301	0.3434	0.0884401
						0.202392	0.417883	0.122832		0.163835	0.343581	0.0887883
						0.203035	0.418263	0.123314		0.163853	0.34447	0.0891365
						0.203096	0.418901	0.123796		0.166873	0.345123	0.0894847
						0.204139	0.421271	0.124277		0.167252	0.345301	0.0898329
						0.204201	0.421968	0.124759		0.169817	0.345367	0.0901811
						0.204468	0.422908	0.125241		0.170306	0.345711	0.0905292
						0.204501	0.423189	0.125723		0.170775	0.346071	0.0908774
						0.20655	0.423495	0.126204		0.171948	0.346079	0.0912256
						0.207144	0.423811	0.126686		0.173322	0.346361	0.0915738
						0.209671	0.425171	0.127168		0.174198	0.346631	0.091922
						0.212683	0.426064	0.127649		0.175053	0.346643	0.0922702
						0.212711	0.426503	0.128131		0.177084	0.348901	0.0926184
						0.214549	0.426797	0.128613		0.179582	0.349746	0.0929666
						0.215573	0.426833	0.129094		0.180259	0.34977	0.0933148
						0.216616	0.427992	0.129576		0.181258	0.350388	0.093663
						0.217412	0.428349	0.130058		0.182217	0.350877	0.0940111
						0.217808	0.428526	0.130539		0.182564	0.351029	0.0943593
						0.218993	0.428617	0.131021		0.182707	0.351814	0.0947075
						0.219464	0.429042	0.131503		0.187407	0.351877	0.0950557
						0.220729	0.429854	0.131985		0.188149	0.352556	0.0954039
						0.221235	0.430217	0.132466		0.188957	0.352691	0.0957521
						0.221245	0.430437	0.132948		0.189455	0.353467	0.0961003
						0.222763	0.430549	0.13343		0.191313	0.354357	0.0964485
						0.223091	0.431571	0.133911		0.194809	0.354683	0.0967967
						0.224823	0.431617	0.134393		0.196098	0.355922	0.0971448
						0.22552	0.432254	0.134875		0.196467	0.357477	0.097493
						0.225597	0.432288	0.135356		0.196552	0.357504	0.0978412
						0.227055	0.432979	0.135838		0.199261	0.357978	0.0981894
						0.227188	0.433019	0.13632		0.201211	0.358953	0.0985376
						0.227726	0.433127	0.136802		0.201576	0.358981	0.0988858
						0.229511	0.433781	0.137283		0.203625	0.35938	0.099234
						0.229875	0.4339	0.137765		0.206348	0.359435	0.0995822
						0.231501	0.433994	0.138247		0.212587	0.360137	0.0999304
						0.233204	0.434022	0.138728		0.214112	0.360231	0.100279
						0.233761	0.4343	0.13921		0.214469	0.360283	0.100627
						0.234118	0.434478	0.139692		0.215823	0.360454	0.100975
						0.236366	0.434539	0.140173		0.215857	0.360721	0.101323
						0.236727	0.434725	0.140655		0.218186	0.360909	0.101671
						0.237395	0.435654	0.141137		0.219393	0.361777	0.102019
						0.237441	0.435755	0.141618		0.219973	0.362044	0.102368
						0.239352	0.435867	0.1421		0.221437	0.362126	0.102716
						0.24016	0.435911	0.142582		0.224274	0.362293	0.103064
						0.240818	0.436474	0.143064		0.224422	0.362381	0.103412
						0.240989	0.43734	0.143545		0.225727	0.364134	0.10376
						0.241623	0.437607	0.144027		0.225792	0.364293	0.104109
						0.241786	0.438109	0.144509		0.227362	0.366107	0.104457
						0.244701	0.439191	0.14499		0.228054	0.366888	0.104805
						0.245176	0.439817	0.145472		0.228467	0.367755	0.105153
						0.24617	0.440875	0.145954		0.229468	0.368197	0.105501
						0.246849	0.441133	0.146435		0.231443	0.368424	0.10585
						0.247171	0.441146	0.146917		0.231825	0.369107	0.106198
						0.247225	0.441261	0.147399		0.233028	0.371763	0.106546
						0.2475	0.441858	0.147881		0.233595	0.372596	0.106894
						0.247836	0.443	0.148362		0.234516	0.372855	0.107242
						0.248853	0.443066	0.148844		0.235688	0.372875	0.107591
						0.249156	0.444246	0.149326		0.237159	0.373436	0.107939
						0.252228	0.446262	0.149807		0.237171	0.373952	0.108287
						0.253215	0.446593	0.150289		0.237251	0.374718	0.108635
						0.253454	0.447382	0.150771		0.238594	0.376697	0.108983
						0.253958	0.447791	0.151252		0.239831	0.377009	0.109331
						0.254785	0.448218	0.151734		0.242997	0.377048	0.10968
						0.254919	0.450142	0.152216		0.243026	0.377659	0.110028
						0.255456	0.450175	0.152697		0.243732	0.377838	0.110376
						0.255634	0.451757	0.153179		0.244971	0.378476	0.110724
						0.256477	0.454453	0.153661		0.245231	0.378965	0.111072
						0.256619	0.455871	0.154143		0.246605	0.379728	0.111421
						0.256974	0.456052	0.154624		0.247635	0.380219	0.111769
						0.259107	0.456146	0.155106		0.250396	0.380338	0.112117
						0.259852	0.457229	0.155588		0.251307	0.380519	0.112465
						0.261809	0.457898	0.156069		0.251619	0.380643	0.112813
						0.264352	0.45847	0.156551		0.254853	0.380997	0.113162
						0.264565	0.460136	0.157033		0.255065	0.381237	0.11351
						0.265744	0.460743	0.157514		0.255362	0.381407	0.113858
						0.269579	0.461045	0.157996		0.255524	0.381505	0.114206
						0.269886	0.461615	0.158478		0.25619	0.381833	0.114554
						0.272491	0.462208	0.15896		0.258133	0.382058	0.114903
						0.277425	0.462969	0.159441		0.258499	0.382823	0.115251
						0.278891	0.463238	0.159923		0.259181	0.383561	0.115599
						0.279581	0.46336	0.160405		0.259652	0.383957	0.115947
						0.280262	0.46374	0.160886		0.260047	0.383981	0.116295
						0.28329	0.463846	0.161368		0.263324	0.384395	0.116643
						0.283463	0.466223	0.16185		0.26592	0.384493	0.116992
						0.284606	0.466469	0.162331		0.26756	0.384982	0.11734
						0.284847	0.466541	0.162813		0.268958	0.38587	0.117688
						0.285096	0.468314	0.163295		0.271294	0.386058	0.118036
						0.285803	0.468687	0.163776		0.271354	0.386177	0.118384
						0.286767	0.469563	0.164258		0.271856	0.38664	0.118733
						0.286873	0.470683	0.16474		0.272429	0.387532	0.119081
						0.287315	0.471295	0.165222		0.273413	0.387658	0.119429
						0.28853	0.471333	0.165703		0.274893	0.390485	0.119777
						0.289147	0.47205	0.166185		0.274926	0.391657	0.120125
						0.290162	0.473011	0.166667		0.275208	0.392104	0.120474
						0.29097	0.473739	0.167148		0.276799	0.392108	0.120822
						0.291595	0.474127	0.16763		0.27691	0.392674	0.12117
						0.292122	0.47456	0.168112		0.277125	0.393093	0.121518
						0.292792	0.475991	0.168593		0.277512	0.393274	0.121866
						0.292962	0.47699	0.169075		0.279479	0.393729	0.122214
						0.293748	0.477738	0.169557		0.28021	0.393751	0.122563
						0.293869	0.478269	0.170039		0.280957	0.393871	0.122911
						0.294349	0.480101	0.17052		0.282643	0.394478	0.123259
						0.296295	0.480611	0.171002		0.283285	0.394678	0.123607
						0.299067	0.480651	0.171484		0.283477	0.395351	0.123955
						0.300334	0.481112	0.171965		0.283687	0.395473	0.124304
						0.300692	0.481128	0.172447		0.284435	0.396202	0.124652
						0.301559	0.482581	0.172929		0.285039	0.396921	0.125
						0.3025	0.484436	0.17341		0.285364	0.397439	0.125348
						0.302811	0.484855	0.173892		0.285801	0.39773	0.125696
						0.303322	0.484915	0.174374		0.286938	0.397823	0.126045
						0.30579	0.485145	0.174855		0.287489	0.398108	0.126393
						0.306087	0.48522	0.175337		0.287934	0.398453	0.126741
						0.306429	0.488183	0.175819		0.288664	0.399205	0.127089
						0.307051	0.48849	0.176301		0.289478	0.399358	0.127437
						0.307167	0.488677	0.176782		0.29017	0.399786	0.127786
						0.308984	0.489577	0.177264		0.290654	0.401585	0.128134
						0.309509	0.489666	0.177746		0.29071	0.401883	0.128482
						0.310318	0.489707	0.178227		0.290944	0.401933	0.12883
						0.312454	0.490156	0.178709		0.291178	0.402296	0.129178
						0.31259	0.493308	0.179191		0.291519	0.402831	0.129526
						0.313447	0.493605	0.179672		0.291828	0.402893	0.129875
						0.313606	0.494267	0.180154		0.292273	0.402953	0.130223
						0.31394	0.496252	0.180636		0.294306	0.403234	0.130571
						0.315484	0.496398	0.181118		0.29489	0.403328	0.130919
						0.316765	0.49662	0.181599		0.295013	0.403426	0.131267
						0.316951	0.496923	0.182081		0.295156	0.404379	0.131616
						0.317146	0.497314	0.182563		0.295928	0.404755	0.131964
						0.317146	0.497934	0.183044		0.296296	0.405344	0.132312
						0.317427	0.498003	0.183526		0.297509	0.406292	0.13266
						0.317783	0.498194	0.184008		0.297725	0.407959	0.133008
						0.31796	0.499298	0.184489		0.297785	0.408121	0.133357
						0.319266	0.499901	0.184971		0.297954	0.4085	0.133705
						0.321169	0.499977	0.185453		0.298368	0.408563	0.134053
						0.322757	0.500238	0.185934		0.298518	0.408672	0.134401
						0.323213	0.500259	0.186416		0.299258	0.408682	0.134749
						0.323295	0.500367	0.186898		0.300291	0.408695	0.135097
						0.325283	0.500542	0.18738		0.300591	0.409511	0.135446
						0.325752	0.501403	0.187861		0.302204	0.409663	0.135794
						0.326021	0.501629	0.188343		0.303213	0.410312	0.136142
						0.326827	0.501719	0.188825		0.304091	0.410341	0.13649
						0.329488	0.502115	0.189306		0.304198	0.410418	0.136838
						0.330595	0.503391	0.189788		0.304413	0.411068	0.137187
						0.331705	0.503454	0.19027		0.305508	0.411079	0.137535
						0.332173	0.503904	0.190751		0.305963	0.411718	0.137883
						0.332351	0.506298	0.191233		0.306374	0.412017	0.138231
						0.333007	0.506985	0.191715		0.307966	0.41209	0.138579
						0.333098	0.507183	0.192197		0.312648	0.412201	0.138928
						0.333172	0.507377	0.192678		0.313392	0.413137	0.139276
						0.333263	0.507982	0.19316		0.31612	0.413495	0.139624
						0.33545	0.508309	0.193642		0.316884	0.413644	0.139972
						0.336273	0.509269	0.194123		0.318254	0.414389	0.14032
						0.336537	0.510909	0.194605		0.318993	0.414585	0.140669
						0.338364	0.511239	0.195087		0.320579	0.41499	0.141017
						0.339147	0.511872	0.195568		0.321611	0.415189	0.141365
						0.340035	0.512003	0.19605		0.322033	0.415492	0.141713
						0.340204	0.51384	0.196532		0.322099	0.415512	0.142061
						0.341104	0.514707	0.197013		0.325219	0.416141	0.142409
						0.342171	0.515674	0.197495		0.325565	0.416523	0.142758
						0.342203	0.516596	0.197977		0.326749	0.416771	0.143106
						0.342953	0.517066	0.198459		0.327245	0.417105	0.143454
						0.343104	0.517355	0.19894		0.328953	0.417518	0.143802
						0.343255	0.520003	0.199422		0.329661	0.417538	0.14415
						0.343415	0.52045	0.199904		0.330351	0.417814	0.144499
						0.34471	0.520928	0.200385		0.331219	0.418201	0.144847
						0.345206	0.521033	0.200867		0.33126	0.419152	0.145195
						0.346318	0.521449	0.201349		0.331673	0.419332	0.145543
						0.34769	0.52173	0.20183		0.332141	0.419496	0.145891
						0.348646	0.522147	0.202312		0.332376	0.420218	0.14624
						0.350487	0.522169	0.202794		0.332496	0.420668	0.146588
						0.351017	0.522815	0.203276		0.332808	0.420672	0.146936
						0.351961	0.523843	0.203757		0.333785	0.421307	0.147284
						0.352007	0.524208	0.204239		0.334332	0.421762	0.147632
						0.35293	0.525635	0.204721		0.336529	0.421768	0.147981
						0.353376	0.52615	0.205202		0.336888	0.423004	0.148329
						0.353774	0.526199	0.205684		0.337768	0.423207	0.148677
						0.353948	0.52653	0.206166		0.338946	0.42345	0.149025
						0.355947	0.527005	0.206647		0.339156	0.423894	0.149373
						0.356491	0.527183	0.207129		0.339457	0.42499	0.149721
						0.357241	0.527299	0.207611		0.339784	0.425644	0.15007
						0.357458	0.528082	0.208092		0.341185	0.425702	0.150418
						0.357604	0.528129	0.208574		0.341269	0.425705	0.150766
						0.357753	0.528216	0.209056		0.342379	0.426955	0.151114
						0.358482	0.528749	0.209538		0.3444	0.427012	0.151462
						0.359508	0.530211	0.210019		0.344639	0.427536	0.151811
						0.359832	0.530654	0.210501		0.344728	0.427552	0.152159
						0.360741	0.531599	0.210983		0.345025	0.427942	0.152507
						0.361856	0.532326	0.211464		0.345121	0.428261	0.152855
						0.365828	0.53248	0.211946		0.34533	0.430161	0.153203
						0.366634	0.5326	0.212428		0.345512	0.430447	0.153552
						0.367266	0.533852	0.212909		0.34592	0.430646	0.1539
						0.368163	0.533892	0.213391		0.347734	0.431306	0.154248
						0.369338	0.535552	0.213873		0.348221	0.431624	0.154596
						0.371246	0.538481	0.214355		0.34861	0.432815	0.154944
						0.371581	0.54007	0.214836		0.349701	0.43328	0.155292
						0.375395	0.540162	0.215318		0.35001	0.433434	0.155641
						0.375601	0.540243	0.2158		0.351232	0.433759	0.155989
						0.376008	0.540409	0.216281		0.352088	0.434215	0.156337
						0.376018	0.541346	0.216763		0.352408	0.434291	0.156685
						0.376229	0.54166	0.217245		0.354085	0.43444	0.157033
						0.376298	0.541751	0.217726		0.356791	0.43452	0.157382
						0.377626	0.542418	0.218208		0.35819	0.435161	0.15773
						0.377826	0.542722	0.21869		0.358511	0.435773	0.158078
						0.377894	0.543015	0.219171		0.359275	0.436055	0.158426
						0.378085	0.544037	0.219653		0.359583	0.436333	0.158774
						0.378691	0.546536	0.220135		0.360083	0.437102	0.159123
						0.38002	0.546799	0.220617		0.360441	0.437787	0.159471
						0.380603	0.547466	0.221098		0.36055	0.437909	0.159819
						0.38065	0.547582	0.22158		0.360664	0.438395	0.160167
						0.380697	0.547602	0.222062		0.360853	0.43862	0.160515
						0.380975	0.551511	0.222543		0.361341	0.439847	0.160864
						0.381095	0.5516	0.223025		0.361627	0.44058	0.161212
						0.381354	0.551948	0.223507		0.363039	0.440611	0.16156
						0.38143	0.552161	0.223988		0.363902	0.44093	0.161908
						0.382281	0.552522	0.22447		0.365635	0.44167	0.162256
						0.383188	0.552613	0.224952		0.366026	0.441878	0.162604
						0.384503	0.553556	0.225434		0.367462	0.441938	0.162953
						0.384577	0.553582	0.225915		0.367732	0.442034	0.163301
						0.385001	0.555444	0.226397		0.36886	0.442503	0.163649
						0.385161	0.555821	0.226879		0.369137	0.442781	0.163997
						0.386133	0.556805	0.22736		0.370167	0.443129	0.164345
						0.386142	0.557756	0.227842		0.370519	0.443141	0.164694
						0.386287	0.558073	0.228324		0.371932	0.443466	0.165042
						0.386432	0.559162	0.228805		0.372157	0.44349	0.16539
						0.386529	0.560436	0.229287		0.372471	0.443955	0.165738
						0.387034	0.560852	0.229769		0.373318	0.444744	0.166086
						0.387472	0.561884	0.23025		0.37544	0.444755	0.166435
						0.387949	0.562322	0.230732		0.37586	0.445668	0.166783
						0.388746	0.562824	0.231214		0.376087	0.445708	0.167131
						0.391358	0.563189	0.231696		0.376566	0.445875	0.167479
						0.391941	0.563623	0.232177		0.376755	0.445986	0.167827
						0.392251	0.564121	0.232659		0.377095	0.446016	0.168175
						0.392829	0.564238	0.233141		0.378191	0.446116	0.168524
						0.393007	0.565212	0.233622		0.378406	0.446342	0.168872
						0.394843	0.565304	0.234104		0.378435	0.446392	0.16922
						0.395659	0.569699	0.234586		0.378603	0.447176	0.169568
						0.395738	0.569842	0.235067		0.380065	0.447398	0.169916
						0.395906	0.569952	0.235549		0.380627	0.448181	0.170265
						0.396256	0.570035	0.236031		0.380627	0.448505	0.170613
						0.396543	0.570683	0.236513		0.38232	0.448597	0.170961
						0.397232	0.570708	0.236994		0.382508	0.448688	0.171309
						0.397888	0.570819	0.237476		0.383662	0.450138	0.171657
						0.39851	0.57082	0.237958		0.384063	0.450884	0.172006
						0.3994	0.571371	0.238439		0.384962	0.451359	0.172354
						0.401024	0.571506	0.238921		0.385534	0.451473	0.172702
						0.402298	0.571935	0.239403		0.385553	0.451956	0.17305
						0.402954	0.572746	0.239884		0.387105	0.452754	0.173398
						0.40451	0.573331	0.240366		0.387596	0.453298	0.173747
						0.404517	0.573517	0.240848		0.387901	0.454691	0.174095
						0.404612	0.574025	0.241329		0.388994	0.454869	0.174443
						0.405691	0.575076	0.241811		0.389279	0.455583	0.174791
						0.406021	0.576017	0.242293		0.389481	0.456117	0.175139
						0.406158	0.576678	0.242775		0.389622	0.456148	0.175487
						0.407917	0.577196	0.243256		0.390239	0.45636	0.175836
						0.408543	0.577385	0.243738		0.391684	0.456362	0.176184
						0.408707	0.577767	0.24422		0.391802	0.456972	0.176532
						0.409025	0.578158	0.244701		0.392272	0.456997	0.17688
						0.409701	0.579291	0.245183		0.394288	0.457483	0.177228
						0.410626	0.579497	0.245665		0.394341	0.457949	0.177577
						0.411587	0.580401	0.246146		0.3947	0.458911	0.177925
						0.412107	0.580725	0.246628		0.39559	0.459041	0.178273
						0.412674	0.580778	0.24711		0.396651	0.45972	0.178621
						0.41483	0.582097	0.247592		0.400903	0.460113	0.178969
						0.414902	0.583002	0.248073		0.403134	0.460908	0.179318
						0.415194	0.584622	0.248555		0.40355	0.460935	0.179666
						0.41551	0.584736	0.249037		0.404429	0.463669	0.180014
						0.415749	0.585633	0.249518		0.404493	0.463717	0.180362
						0.416244	0.585905	0.25		0.406364	0.463808	0.18071
						0.416422	0.588203	0.250482		0.407942	0.465299	0.181058
						0.416578	0.588383	0.250963		0.408462	0.466175	0.181407
						0.418178	0.588644	0.251445		0.408608	0.466782	0.181755
						0.419364	0.589466	0.251927		0.409104	0.467377	0.182103
						0.420145	0.589745	0.252408		0.409636	0.4687	0.182451
						0.421037	0.590498	0.25289		0.410617	0.468738	0.182799
						0.421722	0.590959	0.253372		0.411595	0.468931	0.183148
						0.422305	0.591026	0.253854		0.412463	0.469328	0.183496
						0.422863	0.59108	0.254335		0.412532	0.469794	0.183844
						0.423063	0.59111	0.254817		0.412808	0.471298	0.184192
						0.423172	0.591469	0.255299		0.413374	0.471913	0.18454
						0.424096	0.59156	0.25578		0.414594	0.472187	0.184889
						0.424691	0.592847	0.256262		0.41461	0.472901	0.185237
						0.425096	0.593613	0.256744		0.414833	0.474248	0.185585
						0.42681	0.593739	0.257225		0.415507	0.47552	0.185933
						0.4278	0.594562	0.257707		0.415667	0.476184	0.186281
						0.428131	0.596028	0.258189		0.41571	0.476869	0.18663
						0.428315	0.596821	0.258671		0.415966	0.476889	0.186978
						0.429145	0.597439	0.259152		0.416037	0.47794	0.187326
						0.429731	0.597454	0.259634		0.417176	0.480114	0.187674
						0.429795	0.597799	0.260116		0.417978	0.48069	0.188022
						0.432021	0.597803	0.260597		0.418126	0.480774	0.18837
						0.432448	0.598188	0.261079		0.419221	0.481077	0.188719
						0.433081	0.598454	0.261561		0.419565	0.48133	0.189067
						0.433853	0.599739	0.262042		0.419647	0.482637	0.189415
						0.434455	0.599813	0.262524		0.421077	0.483359	0.189763
						0.434798	0.599934	0.263006		0.423092	0.483458	0.190111
						0.435291	0.600171	0.263487		0.423271	0.484422	0.19046
						0.435685	0.600551	0.263969		0.42392	0.484867	0.190808
						0.436913	0.60173	0.264451		0.423939	0.48537	0.191156
						0.437922	0.601782	0.264933		0.424334	0.485483	0.191504
						0.439041	0.602125	0.265414		0.42483	0.485594	0.191852
						0.439061	0.60233	0.265896		0.425317	0.486029	0.192201
						0.439292	0.602718	0.266378		0.425933	0.486498	0.192549
						0.440407	0.603057	0.266859		0.426371	0.488826	0.192897
						0.440612	0.60336	0.267341		0.427943	0.489174	0.193245
						0.441933	0.603583	0.267823		0.429152	0.489302	0.193593
						0.442102	0.604584	0.268304		0.429167	0.489523	0.193942
						0.442447	0.605004	0.268786		0.430926	0.489721	0.19429
						0.442805	0.605426	0.269268		0.431053	0.490644	0.194638
						0.443177	0.605782	0.26975		0.4311	0.491482	0.194986
						0.443567	0.606206	0.270231		0.431521	0.491545	0.195334
						0.445043	0.606594	0.270713		0.432192	0.491852	0.195682
						0.445885	0.607258	0.271195		0.432413	0.491998	0.196031
						0.449189	0.608141	0.271676		0.434224	0.49202	0.196379
						0.450356	0.608612	0.272158		0.434361	0.492356	0.196727
						0.450456	0.608685	0.27264		0.434373	0.492477	0.197075
						0.451523	0.610125	0.273121		0.43996	0.4929	0.197423
						0.451692	0.610899	0.273603		0.441302	0.493278	0.197772
						0.452223	0.61443	0.274085		0.441677	0.493732	0.19812
						0.453377	0.614469	0.274566		0.44219	0.494145	0.198468
						0.45412	0.615036	0.275048		0.442195	0.49465	0.198816
						0.454705	0.615168	0.27553		0.442452	0.49535	0.199164
						0.454794	0.615642	0.276012		0.442522	0.495912	0.199513
						0.456112	0.616423	0.276493		0.44254	0.496571	0.199861
						0.45612	0.617402	0.276975		0.443056	0.496611	0.200209
						0.456603	0.618129	0.277457		0.443083	0.499061	0.200557
						0.456799	0.618485	0.277938		0.443234	0.499472	0.200905
						0.458721	0.619059	0.27842		0.444947	0.499488	0.201253
						0.459233	0.619088	0.278902		0.445156	0.499888	0.201602
						0.4601	0.620936	0.279383		0.445275	0.50085	0.20195
						0.462099	0.62126	0.279865		0.445408	0.50101	0.202298
						0.462799	0.621912	0.280347		0.446031	0.501396	0.202646
						0.463105	0.622162	0.280829		0.446788	0.501547	0.202994
						0.463712	0.622727	0.28131		0.44681	0.501775	0.203343
						0.464088	0.623313	0.281792		0.447647	0.502376	0.203691
						0.464134	0.623539	0.282274		0.448118	0.502436	0.204039
						0.464563	0.623894	0.282755		0.448741	0.502549	0.204387
						0.464883	0.624332	0.283237		0.449603	0.502596	0.204735
						0.465048	0.624398	0.283719		0.450536	0.502968	0.205084
						0.4666	0.62448	0.2842		0.450965	0.503461	0.205432
						0.467185	0.624538	0.284682		0.45133	0.50436	0.20578
						0.469166	0.624563	0.285164		0.452745	0.504729	0.206128
						0.469712	0.625011	0.285645		0.453256	0.504983	0.206476
						0.470134	0.625655	0.286127		0.454331	0.505404	0.206825
						0.470673	0.626673	0.286609		0.455526	0.505684	0.207173
						0.472391	0.626959	0.287091		0.455767	0.506069	0.207521
						0.473229	0.627262	0.287572		0.456349	0.506404	0.207869
						0.473512	0.627397	0.288054		0.456391	0.508208	0.208217
						0.473762	0.628358	0.288536		0.457132	0.509548	0.208565
						0.47438	0.628983	0.289017		0.457132	0.509624	0.208914
						0.475269	0.629454	0.289499		0.458071	0.510245	0.209262
						0.476086	0.630777	0.289981		0.459042	0.510477	0.20961
						0.476937	0.631095	0.290462		0.460661	0.51118	0.209958
						0.477476	0.632131	0.290944		0.461066	0.511863	0.210306
						0.477784	0.632175	0.291426		0.461092	0.512613	0.210655
						0.479857	0.632615	0.291908		0.462659	0.512978	0.211003
						0.480011	0.632781	0.292389		0.463856	0.513006	0.211351
						0.480961	0.632885	0.292871		0.463941	0.513199	0.211699
						0.48235	0.63317	0.293353		0.465592	0.513213	0.212047
						0.482622	0.63327	0.293834		0.466724	0.513454	0.212396
						0.482821	0.63345	0.294316		0.467707	0.514801	0.212744
						0.483525	0.633467	0.294798		0.467732	0.515301	0.213092
						0.484953	0.633953	0.295279		0.467814	0.516233	0.21344
						0.485022	0.635122	0.295761		0.467818	0.516347	0.213788
						0.485731	0.636358	0.296243		0.46791	0.516989	0.214136
						0.486007	0.640314	0.296724		0.469707	0.518985	0.214485
						0.489131	0.64051	0.297206		0.470267	0.518992	0.214833
						0.489213	0.640754	0.297688		0.47081	0.51954	0.215181
						0.489456	0.641424	0.29817		0.471497	0.519702	0.215529
						0.490131	0.641491	0.298651		0.471687	0.520243	0.215877
						0.491828	0.643522	0.299133		0.472625	0.520473	0.216226
						0.491839	0.644192	0.299615		0.472907	0.520479	0.216574
						0.492024	0.645949	0.300096		0.473025	0.520526	0.216922
						0.494022	0.647937	0.300578		0.474162	0.520667	0.21727
						0.495094	0.650721	0.30106		0.476403	0.520708	0.217618
						0.495368	0.652505	0.301541		0.478279	0.521117	0.217967
						0.495744	0.652691	0.302023		0.47861	0.521151	0.218315
						0.495899	0.653007	0.302505		0.479557	0.521609	0.218663
						0.497293	0.653043	0.302987		0.48002	0.522059	0.219011
						0.497548	0.654249	0.303468		0.480788	0.522065	0.219359
						0.499159	0.654337	0.30395		0.480839	0.52252	0.219708
						0.502149	0.655027	0.304432		0.48111	0.523061	0.220056
						0.502914	0.655996	0.304913		0.481881	0.523444	0.220404
						0.505539	0.656966	0.305395		0.482634	0.523622	0.220752
						0.506537	0.657388	0.305877		0.482794	0.523999	0.2211
						0.507533	0.657837	0.306358		0.482957	0.524004	0.221448
						0.507542	0.657968	0.30684		0.483798	0.524071	0.221797
						0.507705	0.658024	0.307322		0.486359	0.524556	0.222145
						0.507905	0.658154	0.307803		0.486486	0.524678	0.222493
						0.508256	0.658345	0.308285		0.487198	0.524711	0.222841
						0.509288	0.658658	0.308767		0.487521	0.524758	0.223189
						0.509531	0.65901	0.309249		0.487878	0.524764	0.223538
						0.509832	0.659462	0.30973		0.489335	0.526029	0.223886
						0.509914	0.66094	0.310212		0.491296	0.526063	0.224234
						0.510446	0.661309	0.310694		0.491543	0.526202	0.224582
						0.510469	0.662375	0.311175		0.491567	0.52682	0.22493
						0.510889	0.662812	0.311657		0.491567	0.526877	0.225279
						0.512384	0.663798	0.312139		0.491969	0.527548	0.225627
						0.51303	0.664491	0.31262		0.492122	0.528021	0.225975
						0.513537	0.664679	0.313102		0.493049	0.528549	0.226323
						0.51362	0.664716	0.313584		0.493518	0.528583	0.226671
						0.513659	0.665286	0.314066		0.493806	0.528621	0.227019
						0.515384	0.66567	0.314547		0.494694	0.528942	0.227368
						0.515706	0.665887	0.315029		0.494871	0.529347	0.227716
						0.515831	0.666288	0.315511		0.495016	0.529929	0.228064
						0.515964	0.666799	0.315992		0.495685	0.530213	0.228412
						0.516396	0.666833	0.316474		0.496454	0.530626	0.22876
						0.517384	0.667644	0.316956		0.496465	0.530823	0.229109
						0.517489	0.667897	0.317437		0.499814	0.531418	0.229457
						0.51776	0.669272	0.317919		0.499846	0.531503	0.229805
						0.518365	0.669589	0.318401		0.500584	0.533447	0.230153
						0.518852	0.670371	0.318882		0.502196	0.533869	0.230501
						0.520106	0.670377	0.319364		0.502402	0.534792	0.23085
						0.52133	0.671077	0.319846		0.503863	0.535381	0.231198
						0.521434	0.671256	0.320328		0.50606	0.535922	0.231546
						0.521457	0.672081	0.320809		0.506244	0.536207	0.231894
						0.521764	0.67215	0.321291		0.506925	0.536215	0.232242
						0.522432	0.672464	0.321773		0.507154	0.536317	0.232591
						0.522432	0.672741	0.322254		0.50822	0.537294	0.232939
						0.525509	0.67367	0.322736		0.508724	0.53759	0.233287
						0.526482	0.673803	0.323218		0.510489	0.538113	0.233635
						0.526984	0.674329	0.323699		0.511171	0.538767	0.233983
						0.527057	0.67435	0.324181		0.511216	0.538877	0.234331
						0.527324	0.674902	0.324663		0.511322	0.539154	0.23468
						0.528677	0.675108	0.325145		0.511872	0.539159	0.235028
						0.529584	0.677288	0.325626		0.512152	0.539806	0.235376
						0.529992	0.67931	0.326108		0.512287	0.540347	0.235724
						0.530242	0.681032	0.32659		0.512325	0.540466	0.236072
						0.530271	0.68184	0.327071		0.515356	0.540917	0.236421
						0.53123	0.681862	0.327553		0.51543	0.54095	0.236769
						0.531454	0.682247	0.328035		0.516842	0.541861	0.237117
						0.532311	0.682609	0.328516		0.517031	0.542485	0.237465
						0.536413	0.682865	0.328998		0.517756	0.542606	0.237813
						0.536906	0.682956	0.32948		0.518104	0.5429	0.238162
						0.537226	0.683107	0.329961		0.520388	0.544539	0.23851
						0.537502	0.685529	0.330443		0.521802	0.54515	0.238858
						0.538165	0.685983	0.330925		0.52237	0.545318	0.239206
						0.538337	0.686939	0.331407		0.522714	0.545445	0.239554
						0.539056	0.687156	0.331888		0.522897	0.545711	0.239903
						0.53935	0.687444	0.33237		0.523144	0.546074	0.240251
						0.539693	0.687522	0.332852		0.52364	0.546299	0.240599
						0.539979	0.687533	0.333333		0.52369	0.547661	0.240947
						0.5403	0.687973	0.333815		0.523725	0.548538	0.241295
						0.540943	0.688086	0.334297		0.52399	0.548598	0.241643
						0.543727	0.688287	0.334778		0.525884	0.548776	0.241992
						0.544081	0.690041	0.33526		0.526096	0.548843	0.24234
						0.544177	0.69008	0.335742		0.526736	0.549481	0.242688
						0.544453	0.690714	0.336224		0.527868	0.54949	0.243036
						0.545188	0.690802	0.336705		0.528838	0.549879	0.243384
						0.545354	0.691282	0.337187		0.528999	0.549981	0.243733
						0.546468	0.691672	0.337669		0.529296	0.550403	0.244081
						0.549263	0.691856	0.33815		0.52934	0.551104	0.244429
						0.549463	0.692144	0.338632		0.529427	0.551497	0.244777
						0.55036	0.693178	0.339114		0.530452	0.552921	0.245125
						0.55063	0.69356	0.339595		0.530503	0.553234	0.245474
						0.551037	0.693737	0.340077		0.531423	0.553273	0.245822
						0.552269	0.693814	0.340559		0.531451	0.55389	0.24617
						0.552373	0.693997	0.34104		0.532451	0.554502	0.246518
						0.555182	0.694112	0.341522		0.53275	0.55491	0.246866
						0.555534	0.694693	0.342004		0.532825	0.55537	0.247214
						0.556391	0.69478	0.342486		0.533321	0.555621	0.247563
						0.557876	0.694973	0.342967		0.533405	0.556319	0.247911
						0.558483	0.695413	0.343449		0.535178	0.556457	0.248259
						0.558505	0.69563	0.343931		0.53526	0.557658	0.248607
						0.558515	0.696147	0.344412		0.53526	0.559134	0.248955
						0.559261	0.696687	0.344894		0.535317	0.559345	0.249304
						0.559823	0.697157	0.345376		0.535609	0.560079	0.249652
						0.560167	0.697599	0.345857		0.536415	0.560611	0.25
						0.560335	0.697675	0.346339		0.536609	0.561149	0.250348
						0.560997	0.698722	0.346821		0.53704	0.561924	0.250696
						0.561486	0.698811	0.347303		0.537184	0.562237	0.251045
						0.561887	0.699054	0.347784		0.53759	0.562866	0.251393
						0.561957	0.699586	0.348266		0.537751	0.563641	0.251741
						0.562702	0.700226	0.348748		0.538728	0.563753	0.252089
						0.564282	0.700591	0.349229		0.539195	0.56452	0.252437
						0.564662	0.700799	0.349711		0.539351	0.565124	0.252786
						0.567288	0.702647	0.350193		0.539409	0.565364	0.253134
						0.568509	0.70287	0.350674		0.540077	0.565374	0.253482
						0.568607	0.703087	0.351156		0.540845	0.566174	0.25383
						0.568655	0.703699	0.351638		0.542616	0.5672	0.254178
						0.569926	0.703813	0.352119		0.542623	0.567302	0.254526
						0.570085	0.70416	0.352601		0.545496	0.569608	0.254875
						0.570456	0.704815	0.353083		0.545689	0.56991	0.255223
						0.570561	0.705239	0.353565		0.5458	0.570861	0.255571
						0.571575	0.705248	0.354046		0.546536	0.570953	0.255919
						0.571588	0.706505	0.354528		0.546677	0.570985	0.256267
						0.572525	0.706886	0.35501		0.546955	0.571157	0.256616
						0.572826	0.709959	0.355491		0.547075	0.571696	0.256964
						0.573271	0.710673	0.355973		0.547641	0.572013	0.257312
						0.576906	0.710692	0.356455		0.547851	0.572157	0.25766
						0.577582	0.713732	0.356936		0.547862	0.572245	0.258008
						0.5791	0.713795	0.357418		0.547874	0.572567	0.258357
						0.579417	0.714263	0.3579		0.547906	0.573158	0.258705
						0.579942	0.717269	0.358382		0.548025	0.573783	0.259053
						0.580099	0.717511	0.358863		0.54845	0.573981	0.259401
						0.580099	0.719203	0.359345		0.549203	0.575499	0.259749
						0.580587	0.720163	0.359827		0.550367	0.576165	0.260097
						0.580904	0.720217	0.360308		0.552866	0.576169	0.260446
						0.581015	0.720913	0.36079		0.552922	0.576351	0.260794
						0.582725	0.721131	0.361272		0.553157	0.576708	0.261142
						0.583351	0.722143	0.361753		0.554354	0.576936	0.26149
						0.585883	0.724282	0.362235		0.555547	0.577094	0.261838
						0.586903	0.72507	0.362717		0.555606	0.577112	0.262187
						0.587104	0.725212	0.363198		0.556331	0.577432	0.262535
						0.587646	0.726612	0.36368		0.556396	0.577568	0.262883
						0.588173	0.726687	0.364162		0.556513	0.577702	0.263231
						0.588264	0.726803	0.364644		0.558321	0.578572	0.263579
						0.588723	0.727599	0.365125		0.559288	0.580597	0.263928
						0.589089	0.728967	0.365607		0.559912	0.580805	0.264276
						0.589876	0.731005	0.366089		0.560513	0.581325	0.264624
						0.589977	0.731615	0.36657		0.563767	0.581669	0.264972
						0.5904	0.731717	0.367052		0.565266	0.581771	0.26532
						0.590799	0.733338	0.367534		0.565637	0.581857	0.265669
						0.591767	0.733715	0.368015		0.566852	0.582007	0.266017
						0.59189	0.733918	0.368497		0.567657	0.582537	0.266365
						0.592346	0.736581	0.368979		0.567885	0.582746	0.266713
						0.596892	0.737333	0.369461		0.568344	0.58327	0.267061
						0.600005	0.738009	0.369942		0.569779	0.583321	0.267409
						0.601067	0.740672	0.370424		0.569816	0.583515	0.267758
						0.603104	0.741655	0.370906		0.569956	0.583921	0.268106
						0.603188	0.742441	0.371387		0.570551	0.584866	0.268454
						0.603667	0.743125	0.371869		0.571261	0.585704	0.268802
						0.604322	0.743565	0.372351		0.571335	0.586526	0.26915
						0.604429	0.745491	0.372832		0.571914	0.58678	0.269499
						0.605664	0.746771	0.373314		0.571914	0.587697	0.269847
						0.606163	0.747263	0.373796		0.572467	0.58839	0.270195
						0.606671	0.747451	0.374277		0.573086	0.589093	0.270543
						0.607203	0.747523	0.374759		0.573459	0.589148	0.270891
						0.608254	0.747627	0.375241		0.573664	0.589898	0.27124
						0.608785	0.74813	0.375723		0.575341	0.590132	0.271588
						0.60935	0.74889	0.376204		0.576196	0.590423	0.271936
						0.609493	0.749027	0.376686		0.576647	0.590661	0.272284
						0.611044	0.74964	0.377168		0.577439	0.590692	0.272632
						0.611211	0.750846	0.377649		0.577721	0.590792	0.272981
						0.61149	0.751417	0.378131		0.57778	0.591498	0.273329
						0.611503	0.751967	0.378613		0.578686	0.591651	0.273677
						0.612208	0.752058	0.379094		0.579192	0.591819	0.274025
						0.613117	0.752971	0.379576		0.579193	0.592279	0.274373
						0.614137	0.753191	0.380058		0.581081	0.59241	0.274721
						0.614661	0.753196	0.380539		0.584383	0.592431	0.27507
						0.61626	0.753343	0.381021		0.584401	0.592465	0.275418
						0.617747	0.75406	0.381503		0.58494	0.592886	0.275766
						0.618502	0.754176	0.381985		0.585877	0.593	0.276114
						0.618582	0.754328	0.382466		0.586047	0.593125	0.276462
						0.618876	0.755759	0.382948		0.586777	0.594678	0.276811
						0.618978	0.756232	0.38343		0.587636	0.594867	0.277159
						0.619228	0.756609	0.383911		0.587916	0.59516	0.277507
						0.619798	0.757207	0.384393		0.588864	0.595267	0.277855
						0.620834	0.758512	0.384875		0.590259	0.595281	0.278203
						0.62115	0.758961	0.385356		0.590387	0.595411	0.278552
						0.623173	0.759355	0.385838		0.591244	0.597222	0.2789
						0.623564	0.759607	0.38632		0.59165	0.597228	0.279248
						0.623665	0.760125	0.386802		0.592061	0.597594	0.279596
						0.624006	0.760148	0.387283		0.592135	0.598295	0.279944
						0.62557	0.760325	0.387765		0.592172	0.599448	0.280292
						0.625874	0.760991	0.388247		0.59265	0.5995	0.280641
						0.626107	0.761345	0.388728		0.592665	0.599567	0.280989
						0.627745	0.763186	0.38921		0.592784	0.599835	0.281337
						0.628345	0.763627	0.389692		0.593056	0.600243	0.281685
						0.62898	0.764171	0.390173		0.593209	0.600995	0.282033
						0.629262	0.764793	0.390655		0.59452	0.60152	0.282382
						0.630086	0.767081	0.391137		0.594911	0.602684	0.28273
						0.630248	0.767149	0.391618		0.595144	0.603134	0.283078
						0.630434	0.767197	0.3921		0.595264	0.603204	0.283426
						0.631784	0.767386	0.392582		0.595942	0.603835	0.283774
						0.634297	0.76789	0.393064		0.596036	0.604261	0.284123
						0.636016	0.769068	0.393545		0.596233	0.604836	0.284471
						0.636039	0.769487	0.394027		0.596446	0.605948	0.284819
						0.637753	0.770181	0.394509		0.597193	0.605959	0.285167
						0.638533	0.771404	0.39499		0.597665	0.606099	0.285515
						0.638543	0.771879	0.395472		0.597795	0.606217	0.285864
						0.638936	0.77202	0.395954		0.598582	0.606573	0.286212
						0.641233	0.774747	0.396435		0.600485	0.60723	0.28656
						0.641281	0.775319	0.396917		0.601332	0.607368	0.286908
						0.642148	0.775992	0.397399		0.601372	0.60768	0.287256
						0.642604	0.776372	0.397881		0.601522	0.608904	0.287604
						0.642697	0.777138	0.398362		0.601878	0.610121	0.287953
						0.643232	0.777477	0.398844		0.603764	0.610461	0.288301
						0.64364	0.778196	0.399326		0.604257	0.610798	0.288649
						0.644663	0.778928	0.399807		0.604257	0.611316	0.288997
						0.64495	0.780647	0.400289		0.604921	0.612161	0.289345
						0.645048	0.780756	0.400771		0.606681	0.612281	0.289694
						0.645189	0.781361	0.401252		0.607001	0.612517	0.290042
						0.646378	0.781645	0.401734		0.607448	0.612595	0.29039
						0.646673	0.781995	0.402216		0.607735	0.613047	0.290738
						0.647301	0.784189	0.402697		0.609909	0.61344	0.291086
						0.647984	0.784393	0.403179		0.610032	0.614437	0.291435
						0.64826	0.785493	0.403661		0.610178	0.614445	0.291783
						0.648986	0.787357	0.404143		0.610514	0.615091	0.292131
						0.64905	0.788061	0.404624		0.611117	0.615176	0.292479
						0.651134	0.789646	0.405106		0.611417	0.615905	0.292827
						0.651696	0.790838	0.405588		0.611489	0.61593	0.293175
						0.652374	0.791188	0.406069		0.611714	0.615962	0.293524
						0.652436	0.791928	0.406551		0.612314	0.616176	0.293872
						0.653409	0.792478	0.407033		0.613098	0.616281	0.29422
						0.653924	0.792674	0.407514		0.613857	0.616447	0.294568
						0.654416	0.79398	0.407996		0.614588	0.617268	0.294916
						0.654452	0.795678	0.408478		0.614671	0.617473	0.295265
						0.655285	0.795854	0.40896		0.614768	0.618725	0.295613
						0.655998	0.796958	0.409441		0.615123	0.61916	0.295961
						0.657848	0.798279	0.409923		0.615338	0.619929	0.296309
						0.657935	0.798428	0.410405		0.615944	0.62068	0.296657
						0.65825	0.799236	0.410886		0.616723	0.620949	0.297006
						0.658767	0.799903	0.411368		0.617069	0.621528	0.297354
						0.659882	0.800658	0.41185		0.617125	0.62154	0.297702
						0.659894	0.802083	0.412331		0.617186	0.621558	0.29805
						0.660064	0.802283	0.412813		0.617612	0.622438	0.298398
						0.660954	0.804464	0.413295		0.617673	0.622604	0.298747
						0.662179	0.806242	0.413776		0.617684	0.622675	0.299095
						0.662376	0.806979	0.414258		0.617929	0.622705	0.299443
						0.663024	0.807015	0.41474		0.618494	0.622758	0.299791
						0.663451	0.807129	0.415222		0.618636	0.623531	0.300139
						0.663947	0.807289	0.415703		0.619159	0.62387	0.300487
						0.664081	0.807413	0.416185		0.620514	0.623934	0.300836
						0.664332	0.807486	0.416667		0.622639	0.6241	0.301184
						0.664489	0.807532	0.417148		0.623188	0.624294	0.301532
						0.666546	0.808192	0.41763		0.62348	0.624341	0.30188
						0.667114	0.808652	0.418112		0.624287	0.625453	0.302228
						0.667141	0.808766	0.418593		0.62568	0.62558	0.302577
						0.667338	0.809193	0.419075		0.626472	0.625713	0.302925
						0.668448	0.811071	0.419557		0.627219	0.627091	0.303273
						0.668776	0.811413	0.420039		0.627465	0.627464	0.303621
						0.66879	0.812421	0.42052		0.631262	0.627616	0.303969
						0.669387	0.81376	0.421002		0.631618	0.62764	0.304318
						0.669424	0.815002	0.421484		0.632293	0.629167	0.304666
						0.670512	0.818027	0.421965		0.632743	0.629799	0.305014
						0.671389	0.818207	0.422447		0.633324	0.629885	0.305362
						0.671926	0.820248	0.422929		0.634292	0.630186	0.30571
						0.672385	0.820837	0.42341		0.635209	0.63028	0.306058
						0.672903	0.821094	0.423892		0.635757	0.630539	0.306407
						0.672903	0.821207	0.424374		0.637357	0.630677	0.306755
						0.672947	0.821986	0.424855		0.637583	0.630683	0.307103
						0.67299	0.822467	0.425337		0.638226	0.631424	0.307451
						0.673262	0.82301	0.425819		0.638276	0.631681	0.307799
						0.674545	0.823747	0.426301		0.639528	0.631931	0.308148
						0.674636	0.823952	0.426782		0.640272	0.632135	0.308496
						0.674639	0.824599	0.427264		0.640624	0.632196	0.308844
						0.674964	0.825553	0.427746		0.641006	0.632333	0.309192
						0.67599	0.825658	0.428227		0.641084	0.632373	0.30954
						0.676158	0.825832	0.428709		0.64109	0.632895	0.309889
						0.677174	0.826365	0.429191		0.641308	0.634118	0.310237
						0.677457	0.831142	0.429672		0.641627	0.634149	0.310585
						0.678551	0.832061	0.430154		0.642023	0.634521	0.310933
						0.678918	0.833591	0.430636		0.642042	0.63504	0.311281
						0.680225	0.833677	0.431118		0.642597	0.635236	0.31163
						0.680986	0.834943	0.431599		0.645863	0.636545	0.311978
						0.681653	0.835598	0.432081		0.646298	0.636723	0.312326
						0.681899	0.836172	0.432563		0.64631	0.636884	0.312674
						0.683454	0.83644	0.433044		0.646521	0.636902	0.313022
						0.684428	0.836825	0.433526		0.647427	0.637647	0.31337
						0.684452	0.837618	0.434008		0.647617	0.638297	0.313719
						0.684473	0.837685	0.434489		0.649183	0.638392	0.314067
						0.684802	0.838183	0.434971		0.65031	0.638772	0.314415
						0.685403	0.838299	0.435453		0.650433	0.638997	0.314763
						0.687404	0.83852	0.435934		0.651072	0.639705	0.315111
						0.687475	0.839753	0.436416		0.651096	0.640254	0.31546
						0.688191	0.839782	0.436898		0.651156	0.640676	0.315808
						0.688308	0.840374	0.43738		0.652116	0.641454	0.316156
						0.688649	0.840819	0.437861		0.653595	0.642285	0.316504
						0.688686	0.841924	0.438343		0.653712	0.642993	0.316852
						0.688751	0.842035	0.438825		0.653936	0.643075	0.317201
						0.689144	0.842635	0.439306		0.654293	0.643822	0.317549
						0.690216	0.842677	0.439788		0.655161	0.644521	0.317897
						0.692227	0.843023	0.44027		0.655233	0.645234	0.318245
						0.69277	0.843223	0.440751		0.655313	0.64533	0.318593
						0.692913	0.843226	0.441233		0.656208	0.645616	0.318942
						0.693564	0.843404	0.441715		0.657001	0.646104	0.31929
						0.693899	0.843663	0.442197		0.657346	0.646956	0.319638
						0.69499	0.843856	0.442678		0.657484	0.647686	0.319986
						0.696744	0.843913	0.44316		0.657941	0.648177	0.320334
						0.697119	0.844136	0.443642		0.658295	0.649063	0.320682
						0.697379	0.845161	0.444123		0.658468	0.650395	0.321031
						0.699301	0.84552	0.444605		0.659392	0.650525	0.321379
						0.699444	0.845794	0.445087		0.660197	0.65071	0.321727
						0.699536	0.846733	0.445568		0.660331	0.650973	0.322075
						0.699597	0.847503	0.44605		0.660537	0.651791	0.322423
						0.699817	0.848046	0.446532		0.660648	0.652317	0.322772
						0.700412	0.849311	0.447013		0.66135	0.654009	0.32312
						0.700492	0.849532	0.447495		0.661845	0.654704	0.323468
						0.701282	0.850007	0.447977		0.662412	0.655055	0.323816
						0.7024	0.850734	0.448459		0.662492	0.655401	0.324164
						0.702407	0.850874	0.44894		0.662785	0.656038	0.324513
						0.702469	0.851219	0.449422		0.663331	0.657643	0.324861
						0.702646	0.853548	0.449904		0.663846	0.658096	0.325209
						0.703133	0.853642	0.450385		0.664057	0.659004	0.325557
						0.703293	0.854579	0.450867		0.664268	0.660259	0.325905
						0.705495	0.854713	0.451349		0.664979	0.660417	0.326253
						0.70671	0.854768	0.45183		0.665207	0.66137	0.326602
						0.706753	0.855765	0.452312		0.666017	0.661586	0.32695
						0.709378	0.856365	0.452794		0.666295	0.661797	0.327298
						0.711517	0.856476	0.453276		0.667401	0.662089	0.327646
						0.712805	0.856886	0.453757		0.668428	0.662146	0.327994
						0.714135	0.857243	0.454239		0.66926	0.662419	0.328343
						0.715383	0.858169	0.454721		0.669268	0.662427	0.328691
						0.715505	0.859113	0.455202		0.670568	0.662899	0.329039
						0.715645	0.85972	0.455684		0.670832	0.662903	0.329387
						0.715873	0.859763	0.456166		0.671094	0.663204	0.329735
						0.716295	0.861918	0.456647		0.671321	0.663245	0.330084
						0.716517	0.864527	0.457129		0.671821	0.664435	0.330432
						0.717555	0.864541	0.457611		0.672793	0.664483	0.33078
						0.717606	0.866209	0.458092		0.673261	0.665591	0.331128
						0.717701	0.866419	0.458574		0.675588	0.665812	0.331476
						0.719718	0.867834	0.459056		0.675979	0.665987	0.331825
						0.72292	0.86837	0.459538		0.677423	0.666456	0.332173
						0.724613	0.86893	0.460019		0.677827	0.666606	0.332521
						0.724935	0.872038	0.460501		0.678207	0.667135	0.332869
						0.726022	0.873622	0.460983		0.678448	0.667999	0.333217
						0.726363	0.873675	0.461464		0.678574	0.669126	0.333565
						0.727614	0.874584	0.461946		0.679679	0.669683	0.333914
						0.727629	0.875382	0.462428		0.681541	0.669703	0.334262
						0.727969	0.875686	0.462909		0.681931	0.669854	0.33461
						0.728864	0.877411	0.463391		0.681951	0.671995	0.334958
						0.729161	0.877694	0.463873		0.682811	0.672381	0.335306
						0.729195	0.879889	0.464355		0.683176	0.672442	0.335655
						0.729383	0.880802	0.464836		0.683956	0.67247	0.336003
						0.731127	0.881389	0.465318		0.685242	0.672502	0.336351
						0.732876	0.881448	0.4658		0.685557	0.67318	0.336699
						0.733059	0.882843	0.466281		0.686255	0.673204	0.337047
						0.733539	0.883359	0.466763		0.68662	0.673901	0.337396
						0.733944	0.883905	0.467245		0.686696	0.673989	0.337744
						0.734229	0.886107	0.467726		0.688485	0.67479	0.338092
						0.735204	0.887117	0.468208		0.690922	0.674859	0.33844
						0.73574	0.88744	0.46869		0.691818	0.675668	0.338788
						0.736924	0.887692	0.469171		0.691944	0.676041	0.339136
						0.738403	0.887871	0.469653		0.692031	0.676332	0.339485
						0.738647	0.888096	0.470135		0.692248	0.677093	0.339833
						0.740826	0.888777	0.470617		0.692401	0.677818	0.340181
						0.74141	0.8891	0.471098		0.693866	0.678324	0.340529
						0.743209	0.889261	0.47158		0.694355	0.678381	0.340877
						0.74429	0.891216	0.472062		0.695307	0.678558	0.341226
						0.744918	0.893074	0.472543		0.695702	0.6789	0.341574
						0.744937	0.894264	0.473025		0.69617	0.680416	0.341922
						0.745957	0.894308	0.473507		0.697518	0.680502	0.34227
						0.74599	0.894947	0.473988		0.698055	0.680597	0.342618
						0.746994	0.897068	0.47447		0.698669	0.680771	0.342967
						0.747668	0.897484	0.474952		0.700108	0.681224	0.343315
						0.748045	0.897896	0.475434		0.700419	0.681509	0.343663
						0.748753	0.89883	0.475915		0.701047	0.681747	0.344011
						0.749387	0.901691	0.476397		0.702742	0.682262	0.344359
						0.750089	0.901813	0.476879		0.703692	0.682843	0.344708
						0.751815	0.903338	0.47736		0.704544	0.683883	0.345056
						0.752949	0.903718	0.477842		0.704564	0.685169	0.345404
						0.75357	0.904143	0.478324		0.704968	0.685583	0.345752
						0.754049	0.904149	0.478805		0.706825	0.686022	0.3461
						0.75447	0.904721	0.479287		0.707323	0.686728	0.346448
						0.755079	0.904724	0.479769		0.708993	0.686873	0.346797
						0.755534	0.906692	0.48025		0.709012	0.687992	0.347145
						0.756661	0.907075	0.480732		0.709791	0.688003	0.347493
						0.756983	0.908089	0.481214		0.709871	0.688988	0.347841
						0.758032	0.909752	0.481696		0.710368	0.68902	0.348189
						0.759136	0.910476	0.482177		0.710928	0.689226	0.348538
						0.759306	0.910515	0.482659		0.711722	0.689279	0.348886
						0.761541	0.911474	0.483141		0.712674	0.690029	0.349234
						0.761692	0.914139	0.483622		0.712791	0.690506	0.349582
						0.761791	0.915564	0.484104		0.714073	0.690585	0.34993
						0.763003	0.91703	0.484586		0.714655	0.691875	0.350279
						0.763113	0.917543	0.485067		0.714925	0.692655	0.350627
						0.763948	0.919133	0.485549		0.715293	0.693012	0.350975
						0.763977	0.920475	0.486031		0.716294	0.693324	0.351323
						0.764722	0.920581	0.486513		0.717198	0.693418	0.351671
						0.764781	0.920876	0.486994		0.717847	0.694292	0.352019
						0.76635	0.920899	0.487476		0.717891	0.694372	0.352368
						0.766389	0.921945	0.487958		0.717975	0.694745	0.352716
						0.767139	0.923024	0.488439		0.718329	0.695313	0.353064
						0.768003	0.92411	0.488921		0.71995	0.69584	0.353412
						0.768404	0.925461	0.489403		0.720668	0.696021	0.35376
						0.769547	0.925532	0.489884		0.720815	0.697407	0.354109
						0.772013	0.92571	0.490366		0.720913	0.700516	0.354457
						0.774082	0.925872	0.490848		0.720979	0.701318	0.354805
						0.774972	0.926013	0.491329		0.721891	0.701373	0.355153
						0.775194	0.927021	0.491811		0.721911	0.701476	0.355501
						0.775368	0.928294	0.492293		0.72256	0.701502	0.35585
						0.778092	0.928484	0.492775		0.722889	0.701986	0.356198
						0.780108	0.928858	0.493256		0.723631	0.704282	0.356546
						0.780575	0.930497	0.493738		0.723806	0.705122	0.356894
						0.780828	0.930962	0.49422		0.72412	0.706278	0.357242
						0.781223	0.932089	0.494701		0.724591	0.706829	0.357591
						0.781436	0.934656	0.495183		0.72471	0.707626	0.357939
						0.782074	0.934879	0.495665		0.724784	0.70771	0.358287
						0.782617	0.934964	0.496146		0.725008	0.70936	0.358635
						0.783088	0.937024	0.496628		0.725146	0.709478	0.358983
						0.783194	0.937635	0.49711		0.725311	0.710834	0.359331
						0.784229	0.938444	0.497592		0.72746	0.712912	0.35968
						0.785686	0.939041	0.498073		0.728084	0.713032	0.360028
						0.785792	0.94101	0.498555		0.728096	0.713605	0.360376
						0.78597	0.943834	0.499037		0.728785	0.713786	0.360724
						0.787049	0.944911	0.499518		0.731448	0.714137	0.361072
						0.787236	0.945044	0.5		0.731461	0.714711	0.361421
						0.789529	0.945537	0.500482		0.731657	0.714857	0.361769
						0.789665	0.94648	0.500963		0.731913	0.714927	0.362117
						0.789849	0.947524	0.501445		0.732402	0.715005	0.362465
						0.79181	0.947779	0.501927		0.733318	0.715067	0.362813
						0.792898	0.947945	0.502408		0.734016	0.715225	0.363162
						0.793104	0.948742	0.50289		0.734736	0.715467	0.36351
						0.794555	0.951862	0.503372		0.735349	0.716256	0.363858
						0.795004	0.952119	0.503854		0.735584	0.716594	0.364206
						0.795479	0.953561	0.504335		0.735807	0.716618	0.364554
						0.795924	0.954548	0.504817		0.735998	0.717117	0.364903
						0.796357	0.954833	0.505299		0.736773	0.71787	0.365251
						0.796915	0.955483	0.50578		0.737727	0.718244	0.365599
						0.797113	0.955658	0.506262		0.737741	0.718398	0.365947
						0.79788	0.957404	0.506744		0.738598	0.718464	0.366295
						0.798276	0.958605	0.507225		0.738754	0.718672	0.366643
						0.798741	0.958927	0.507707		0.738839	0.718786	0.366992
						0.799604	0.959181	0.508189		0.740213	0.719354	0.36734
						0.800642	0.959232	0.508671		0.740283	0.720019	0.367688
						0.801782	0.959992	0.509152		0.74117	0.720329	0.368036
						0.801872	0.960025	0.509634		0.742626	0.720698	0.368384
						0.802462	0.960771	0.510116		0.74272	0.722233	0.368733
						0.804245	0.960866	0.510597		0.745908	0.722607	0.369081
						0.805036	0.962421	0.511079		0.746733	0.722631	0.369429
						0.806946	0.962427	0.511561		0.747369	0.722721	0.369777
						0.808558	0.963466	0.512042		0.748024	0.723649	0.370125
						0.809064	0.964157	0.512524		0.748169	0.724101	0.370474
						0.809755	0.964335	0.513006		0.74881	0.726153	0.370822
						0.811176	0.96488	0.513487		0.749399	0.726373	0.37117
						0.811784	0.965015	0.513969		0.749931	0.726919	0.371518
						0.81278	0.965793	0.514451		0.75158	0.728031	0.371866
						0.81304	0.96807	0.514933		0.75252	0.728072	0.372214
						0.814677	0.968192	0.515414		0.752744	0.728366	0.372563
						0.814762	0.96827	0.515896		0.752911	0.728407	0.372911
						0.814866	0.970238	0.516378		0.754076	0.728584	0.373259
						0.815013	0.970628	0.516859		0.755546	0.729083	0.373607
						0.81526	0.971664	0.517341		0.755952	0.729572	0.373955
						0.816734	0.971858	0.517823		0.756065	0.729593	0.374304
						0.817112	0.972172	0.518304		0.756226	0.729636	0.374652
						0.817654	0.972398	0.518786		0.756567	0.730082	0.375
						0.818192	0.973826	0.519268		0.759177	0.730256	0.375348
						0.820245	0.973873	0.51975		0.759191	0.730627	0.375696
						0.821625	0.975431	0.520231		0.759219	0.730744	0.376045
						0.822062	0.97611	0.520713		0.759718	0.730866	0.376393
						0.822103	0.977385	0.521195		0.760413	0.731044	0.376741
						0.827346	0.977401	0.521676		0.760474	0.731115	0.377089
						0.827371	0.978184	0.522158		0.761502	0.733559	0.377437
						0.830232	0.978999	0.52264		0.762119	0.733958	0.377786
						0.831197	0.979012	0.523121		0.762603	0.734552	0.378134
						0.831221	0.98038	0.523603		0.76304	0.735298	0.378482
						0.831993	0.982509	0.524085		0.763704	0.735627	0.37883
						0.83256	0.982736	0.524566		0.763753	0.735771	0.379178
						0.834066	0.982847	0.525048		0.764032	0.737865	0.379526
						0.834287	0.984519	0.52553		0.764105	0.738826	0.379875
						0.834575	0.985417	0.526012		0.765725	0.739213	0.380223
						0.835125	0.985665	0.526493		0.765795	0.739339	0.380571
						0.835632	0.988801	0.526975		0.766326	0.739662	0.380919
						0.837489	0.98981	0.527457		0.766983	0.739894	0.381267
						0.837918	0.992262	0.527938		0.767244	0.740289	0.381616
						0.838232	0.992682	0.52842		0.76735	0.74049	0.381964
						0.83827	0.993936	0.528902		0.769086	0.740618	0.382312
						0.838771	0.995642	0.529383		0.769422	0.741262	0.38266
						0.839021	0.995789	0.529865		0.770317	0.741556	0.383008
						0.839177	0.995952	0.530347		0.771013	0.741984	0.383357
						0.839696	0.996145	0.530829		0.771553	0.742728	0.383705
						0.840455	0.997313	0.53131		0.771553	0.742925	0.384053
						0.841485	0.999758	0.531792		0.772259	0.743161	0.384401
						0.841877	1.00054	0.532274		0.773218	0.743262	0.384749
						0.841982	1.00395	0.532755		0.773947	0.743833	0.385097
						0.842427	1.004	0.533237		0.774959	0.744366	0.385446
						0.84383	1.00577	0.533719		0.775364	0.745018	0.385794
						0.844464	1.00878	0.5342		0.775931	0.7451	0.386142
						0.845166	1.009	0.534682		0.776013	0.746913	0.38649
						0.846725	1.00956	0.535164		0.77801	0.747958	0.386838
						0.846884	1.0102	0.535645		0.780064	0.748293	0.387187
						0.846932	1.01167	0.536127		0.780504	0.749122	0.387535
						0.8473	1.01321	0.536609		0.780558	0.749122	0.387883
						0.847435	1.01603	0.537091		0.780809	0.749858	0.388231
						0.848891	1.01779	0.537572		0.782145	0.750706	0.388579
						0.850163	1.02214	0.538054		0.782511	0.750834	0.388928
						0.852242	1.02302	0.538536		0.782903	0.751248	0.389276
						0.85244	1.02309	0.539017		0.783511	0.751767	0.389624
						0.854303	1.0234	0.539499		0.784295	0.752724	0.389972
						0.854346	1.0256	0.539981		0.786203	0.754109	0.39032
						0.855116	1.02832	0.540462		0.786809	0.754153	0.390669
						0.855332	1.02841	0.540944		0.787228	0.754503	0.391017
						0.85545	1.02917	0.541426		0.787403	0.756063	0.391365
						0.858899	1.02983	0.541908		0.787493	0.757422	0.391713
						0.859414	1.03055	0.542389		0.787766	0.757771	0.392061
						0.860688	1.03168	0.542871		0.789561	0.758188	0.392409
						0.860841	1.03199	0.543353		0.790687	0.758802	0.392758
						0.862957	1.03224	0.543834		0.790861	0.75884	0.393106
						0.863189	1.03342	0.544316		0.791081	0.759461	0.393454
						0.864938	1.03509	0.544798		0.791304	0.759871	0.393802
						0.866383	1.03569	0.545279		0.791844	0.760911	0.39415
						0.866707	1.03818	0.545761		0.793059	0.76095	0.394499
						0.866962	1.03849	0.546243		0.793093	0.761465	0.394847
						0.867967	1.03849	0.546724		0.793341	0.762653	0.395195
						0.869175	1.03934	0.547206		0.794977	0.762708	0.395543
						0.870034	1.04138	0.547688		0.79539	0.762814	0.395891
						0.871072	1.04161	0.54817		0.795636	0.763058	0.39624
						0.873826	1.04172	0.548651		0.795833	0.763323	0.396588
						0.874218	1.04392	0.549133		0.79584	0.764249	0.396936
						0.874645	1.04502	0.549615		0.796036	0.764731	0.397284
						0.876391	1.04512	0.550096		0.796202	0.764878	0.397632
						0.877244	1.04549	0.550578		0.796792	0.765318	0.397981
						0.87847	1.04593	0.55106		0.796983	0.765532	0.398329
						0.879146	1.04754	0.551541		0.797786	0.765751	0.398677
						0.87951	1.04816	0.552023		0.797837	0.766628	0.399025
						0.880587	1.0489	0.552505		0.798017	0.767479	0.399373
						0.881465	1.04958	0.552987		0.79824	0.767637	0.399721
						0.88424	1.05124	0.553468		0.799291	0.768173	0.40007
						0.88458	1.05173	0.55395		0.799748	0.768712	0.400418
						0.885108	1.05304	0.554432		0.800508	0.769413	0.400766
						0.885264	1.05327	0.554913		0.800658	0.769533	0.401114
						0.886616	1.05336	0.555395		0.800746	0.770461	0.401462
						0.886938	1.05414	0.555877		0.802049	0.770705	0.401811
						0.88744	1.05485	0.556358		0.80254	0.771264	0.402159
						0.887453	1.05519	0.55684		0.803351	0.771389	0.402507
						0.887674	1.05551	0.557322		0.803638	0.77152	0.402855
						0.888041	1.0556	0.557803		0.804128	0.77181	0.403203
						0.888394	1.05561	0.558285		0.804461	0.772299	0.403552
						0.888424	1.05575	0.558767		0.805629	0.772574	0.4039
						0.889624	1.05688	0.559249		0.80569	0.773128	0.404248
						0.892049	1.05697	0.55973		0.805962	0.774137	0.404596
						0.893216	1.05718	0.560212		0.80615	0.774306	0.404944
						0.894499	1.05805	0.560694		0.807548	0.774855	0.405292
						0.894741	1.05943	0.561175		0.808805	0.77488	0.405641
						0.894744	1.06007	0.561657		0.808832	0.775216	0.405989
						0.895895	1.06031	0.562139		0.808912	0.775259	0.406337
						0.896198	1.06064	0.56262		0.809958	0.775793	0.406685
						0.896702	1.06195	0.563102		0.811308	0.776029	0.407033
						0.897506	1.06233	0.563584		0.811505	0.776134	0.407382
						0.897834	1.06411	0.564066		0.813241	0.776355	0.40773
						0.898258	1.06418	0.564547		0.813856	0.7766	0.408078
						0.898807	1.0648	0.565029		0.814003	0.778512	0.408426
						0.89895	1.06642	0.565511		0.814329	0.778637	0.408774
						0.900922	1.06663	0.565992		0.814793	0.779577	0.409123
						0.900988	1.06706	0.566474		0.815238	0.779963	0.409471
						0.902672	1.07091	0.566956		0.818136	0.779966	0.409819
						0.903892	1.0713	0.567437		0.818321	0.781405	0.410167
						0.906381	1.07172	0.567919		0.81835	0.783676	0.410515
						0.907057	1.07205	0.568401		0.818517	0.783803	0.410864
						0.908377	1.07253	0.568882		0.818541	0.784052	0.411212
						0.909563	1.07303	0.569364		0.818543	0.784702	0.41156
						0.91077	1.07307	0.569846		0.818543	0.785171	0.411908
						0.912065	1.07422	0.570328		0.819446	0.785194	0.412256
						0.912585	1.07559	0.570809		0.819533	0.785212	0.412604
						0.913262	1.0764	0.571291		0.820165	0.786291	0.412953
						0.91487	1.07655	0.571773		0.820165	0.788034	0.413301
						0.915245	1.07698	0.572254		0.820594	0.788658	0.413649
						0.915263	1.07738	0.572736		0.820718	0.788862	0.413997
						0.915578	1.07939	0.573218		0.82103	0.789222	0.414345
						0.916077	1.08033	0.573699		0.82365	0.789587	0.414694
						0.916341	1.08119	0.574181		0.823782	0.789751	0.415042
						0.918155	1.08137	0.574663		0.824516	0.789897	0.41539
						0.918306	1.08148	0.575145		0.825105	0.790203	0.415738
						0.919014	1.08254	0.575626		0.826505	0.790313	0.416086
						0.919016	1.0842	0.576108		0.827171	0.7907	0.416435
						0.920774	1.08423	0.57659		0.828427	0.790728	0.416783
						0.921836	1.08684	0.577071		0.829403	0.790876	0.417131
						0.921992	1.08769	0.577553		0.830434	0.791206	0.417479
						0.922738	1.08813	0.578035		0.831501	0.793019	0.417827
						0.922786	1.08976	0.578516		0.833221	0.793222	0.418175
						0.923196	1.08977	0.578998		0.833701	0.793565	0.418524
						0.923539	1.09003	0.57948		0.833773	0.793615	0.418872
						0.924247	1.09091	0.579961		0.834816	0.795351	0.41922
						0.926797	1.0945	0.580443		0.835285	0.795777	0.419568
						0.927202	1.09538	0.580925		0.835341	0.796258	0.419916
						0.927268	1.09622	0.581407		0.835881	0.796855	0.420265
						0.928547	1.09861	0.581888		0.838205	0.797577	0.420613
						0.928862	1.0992	0.58237		0.839705	0.797902	0.420961
						0.930204	1.10061	0.582852		0.839884	0.798028	0.421309
						0.931281	1.1008	0.583333		0.840704	0.798282	0.421657
						0.932614	1.10266	0.583815		0.842326	0.798929	0.422006
						0.932671	1.10318	0.584297		0.843545	0.799023	0.422354
						0.933452	1.10379	0.584778		0.843663	0.79996	0.422702
						0.935775	1.10418	0.58526		0.845159	0.800006	0.42305
						0.936312	1.10449	0.585742		0.845374	0.802456	0.423398
						0.936954	1.10531	0.586224		0.845969	0.802863	0.423747
						0.937136	1.10736	0.586705		0.846862	0.804067	0.424095
						0.938079	1.10773	0.587187		0.848538	0.806653	0.424443
						0.93866	1.10957	0.587669		0.848818	0.807098	0.424791
						0.939482	1.11031	0.58815		0.849404	0.807575	0.425139
						0.939586	1.11188	0.588632		0.851699	0.808031	0.425487
						0.939979	1.11253	0.589114		0.851804	0.809014	0.425836
						0.940079	1.11318	0.589595		0.853567	0.80916	0.426184
						0.940285	1.11364	0.590077		0.853617	0.809227	0.426532
						0.940784	1.1166	0.590559		0.854314	0.809428	0.42688
						0.94151	1.11707	0.59104		0.854647	0.809872	0.427228
						0.944128	1.11944	0.591522		0.855016	0.810463	0.427577
						0.94479	1.11973	0.592004		0.85617	0.810637	0.427925
						0.945297	1.11977	0.592486		0.856421	0.81079	0.428273
						0.945298	1.12052	0.592967		0.856527	0.810927	0.428621
						0.945473	1.12083	0.593449		0.857055	0.81154	0.428969
						0.946081	1.12197	0.593931		0.859542	0.811551	0.429318
						0.947899	1.12387	0.594412		0.861461	0.812475	0.429666
						0.947916	1.12402	0.594894		0.862647	0.812802	0.430014
						0.948763	1.12409	0.595376		0.862749	0.813897	0.430362
						0.94981	1.12468	0.595857		0.862924	0.81506	0.43071
						0.950359	1.12519	0.596339		0.863048	0.815326	0.431058
						0.952115	1.12773	0.596821		0.863254	0.817888	0.431407
						0.952303	1.13132	0.597303		0.863701	0.818346	0.431755
						0.952862	1.13185	0.597784		0.864619	0.818733	0.432103
						0.953089	1.13463	0.598266		0.865059	0.819018	0.432451
						0.953436	1.13473	0.598748		0.866015	0.8193	0.432799
						0.953564	1.13497	0.599229		0.867252	0.819754	0.433148
						0.956069	1.13788	0.599711		0.867271	0.819794	0.433496
						0.956167	1.13807	0.600193		0.867405	0.82204	0.433844
						0.956543	1.1383	0.600674		0.868596	0.822548	0.434192
						0.957276	1.13922	0.601156		0.868874	0.822608	0.43454
						0.957873	1.14276	0.601638		0.869449	0.822962	0.434889
						0.95884	1.14533	0.602119		0.869546	0.824064	0.435237
						0.958915	1.14575	0.602601		0.870895	0.824363	0.435585
						0.959705	1.1459	0.603083		0.871714	0.82451	0.435933
						0.960153	1.14645	0.603565		0.872737	0.825786	0.436281
						0.960375	1.14874	0.604046		0.872806	0.82597	0.43663
						0.960385	1.15291	0.604528		0.873273	0.827006	0.436978
						0.960724	1.15388	0.60501		0.874476	0.827075	0.437326
						0.963476	1.15458	0.605491		0.87495	0.827407	0.437674
						0.965549	1.15542	0.605973		0.874969	0.827441	0.438022
						0.966541	1.15601	0.606455		0.875033	0.827813	0.43837
						0.96718	1.15718	0.606936		0.87605	0.827983	0.438719
						0.967245	1.1577	0.607418		0.87726	0.82803	0.439067
						0.967945	1.15966	0.6079		0.878338	0.828467	0.439415
						0.968239	1.1598	0.608382		0.878665	0.828819	0.439763
						0.969121	1.1624	0.608863		0.878983	0.828864	0.440111
						0.970753	1.16369	0.609345		0.879169	0.829344	0.44046
						0.972207	1.16391	0.609827		0.879256	0.830109	0.440808
						0.972973	1.16431	0.610308		0.879694	0.830869	0.441156
						0.973011	1.16539	0.61079		0.880568	0.831306	0.441504
						0.97307	1.16829	0.611272		0.881706	0.831862	0.441852
						0.973509	1.18066	0.611753		0.881729	0.832372	0.442201
						0.974055	1.18173	0.612235		0.881907	0.832415	0.442549
						0.974828	1.18291	0.612717		0.883872	0.832586	0.442897
						0.975044	1.18464	0.613198		0.884159	0.83409	0.443245
						0.975416	1.18592	0.61368		0.884658	0.834333	0.443593
						0.975688	1.18781	0.614162		0.886341	0.834436	0.443942
						0.975845	1.18876	0.614644		0.886532	0.834797	0.44429
						0.975963	1.19009	0.615125		0.886687	0.835872	0.444638
						0.977069	1.19016	0.615607		0.886966	0.836009	0.444986
						0.978824	1.19159	0.616089		0.887228	0.837238	0.445334
						0.979723	1.19193	0.61657		0.887337	0.837445	0.445682
						0.98188	1.19415	0.617052		0.889389	0.838296	0.446031
						0.983774	1.19489	0.617534		0.892553	0.838442	0.446379
						0.984137	1.197	0.618015		0.894006	0.838629	0.446727
						0.985135	1.19716	0.618497		0.894497	0.839046	0.447075
						0.98676	1.19856	0.618979		0.895311	0.839436	0.447423
						0.986928	1.19894	0.619461		0.895321	0.840309	0.447772
						0.98694	1.19933	0.619942		0.89643	0.84077	0.44812
						0.990338	1.19965	0.620424		0.896788	0.840932	0.448468
						0.990455	1.20007	0.620906		0.897374	0.841087	0.448816
						0.990584	1.20034	0.621387		0.898183	0.84144	0.449164
						0.991829	1.20172	0.621869		0.898545	0.841541	0.449513
						0.993148	1.20187	0.622351		0.898793	0.841614	0.449861
						0.994621	1.20538	0.622832		0.898843	0.842949	0.450209
						0.995097	1.20605	0.623314		0.900176	0.844254	0.450557
						0.99569	1.21054	0.623796		0.900711	0.844752	0.450905
						0.996919	1.21355	0.624277		0.900736	0.844908	0.451253
						0.997049	1.21426	0.624759		0.901293	0.845492	0.451602
						0.997487	1.21861	0.625241		0.901503	0.845774	0.45195
						0.9977	1.22272	0.625723		0.904703	0.847387	0.452298
						0.998165	1.22371	0.626204		0.905033	0.847813	0.452646
						0.998692	1.22565	0.626686		0.905282	0.84787	0.452994
						1.0002	1.22602	0.627168		0.905297	0.850259	0.453343
						1.001	1.22605	0.627649		0.905916	0.85046	0.453691
						1.00131	1.22646	0.628131		0.906303	0.850678	0.454039
						1.00187	1.22654	0.628613		0.906941	0.85096	0.454387
						1.0021	1.22657	0.629094		0.908172	0.851751	0.454735
						1.00222	1.22903	0.629576		0.908694	0.853027	0.455084
						1.00469	1.22928	0.630058		0.908879	0.853922	0.455432
						1.0053	1.22981	0.630539		0.910943	0.854502	0.45578
						1.00575	1.22988	0.631021		0.911109	0.856418	0.456128
						1.00612	1.23102	0.631503		0.911738	0.856841	0.456476
						1.01056	1.23135	0.631985		0.911852	0.857541	0.456825
						1.01233	1.23158	0.632466		0.912053	0.858871	0.457173
						1.01374	1.23174	0.632948		0.912266	0.859161	0.457521
						1.01377	1.23195	0.63343		0.913231	0.859783	0.457869
						1.01391	1.23304	0.633911		0.914379	0.860704	0.458217
						1.01467	1.23333	0.634393		0.914425	0.860808	0.458565
						1.01472	1.23337	0.634875		0.9162	0.860845	0.458914
						1.01658	1.23415	0.635356		0.91692	0.860901	0.459262
						1.01723	1.23451	0.635838		0.917633	0.861603	0.45961
						1.01791	1.23575	0.63632		0.917817	0.861608	0.459958
						1.01946	1.23685	0.636802		0.919272	0.861709	0.460306
						1.02087	1.23788	0.637283		0.919952	0.862704	0.460655
						1.02101	1.23946	0.637765		0.920137	0.863035	0.461003
						1.02115	1.23997	0.638247		0.920402	0.863594	0.461351
						1.02309	1.24057	0.638728		0.92108	0.863806	0.461699
						1.02362	1.24073	0.63921		0.921112	0.865374	0.462047
						1.02401	1.24121	0.639692		0.921363	0.866008	0.462396
						1.02449	1.24152	0.640173		0.922932	0.867656	0.462744
						1.02565	1.24198	0.640655		0.923021	0.867689	0.463092
						1.02626	1.24252	0.641137		0.923091	0.867935	0.46344
						1.02628	1.24337	0.641618		0.923151	0.867967	0.463788
						1.02632	1.24418	0.6421		0.923178	0.868269	0.464136
						1.02669	1.24555	0.642582		0.924142	0.868565	0.464485
						1.02836	1.24725	0.643064		0.92432	0.868772	0.464833
						1.02908	1.25083	0.643545		0.924657	0.869097	0.465181
						1.02937	1.25146	0.644027		0.924827	0.869227	0.465529
						1.0296	1.25183	0.644509		0.924931	0.869327	0.465877
						1.03086	1.2526	0.64499		0.92532	0.87047	0.466226
						1.03141	1.25392	0.645472		0.92623	0.870741	0.466574
						1.03171	1.25505	0.645954		0.926331	0.871183	0.466922
						1.032	1.25638	0.646435		0.928879	0.872181	0.46727
						1.03374	1.25798	0.646917		0.929775	0.872248	0.467618
						1.03394	1.25822	0.647399		0.930268	0.874243	0.467967
						1.03396	1.25948	0.647881		0.930489	0.874981	0.468315
						1.03469	1.26429	0.648362		0.93079	0.875889	0.468663
						1.03575	1.27017	0.648844		0.932326	0.876249	0.469011
						1.03852	1.27041	0.649326		0.932567	0.876732	0.469359
						1.04035	1.27168	0.649807		0.932578	0.876884	0.469708
						1.04152	1.27173	0.650289		0.933177	0.877402	0.470056
						1.04161	1.27288	0.650771		0.933428	0.877831	0.470404
						1.04269	1.2735	0.651252		0.935253	0.878303	0.470752
						1.0429	1.2745	0.651734		0.936948	0.87881	0.4711
						1.04526	1.27506	0.652216		0.937662	0.878855	0.471448
						1.04571	1.27612	0.652697		0.938493	0.879226	0.471797
						1.04832	1.27651	0.653179		0.938767	0.879233	0.472145
						1.04859	1.27669	0.653661		0.939563	0.879571	0.472493
						1.04995	1.28013	0.654143		0.939683	0.880258	0.472841
						1.05307	1.28445	0.654624		0.939752	0.881601	0.473189
						1.05318	1.29071	0.655106		0.939863	0.882146	0.473538
						1.05412	1.29122	0.655588		0.940629	0.882173	0.473886
						1.05437	1.29125	0.656069		0.940828	0.882475	0.474234
						1.05575	1.29215	0.656551		0.941342	0.882485	0.474582
						1.05711	1.29315	0.657033		0.941968	0.882776	0.47493
						1.05976	1.29351	0.657514		0.942403	0.883157	0.475279
						1.0609	1.29357	0.657996		0.942781	0.88419	0.475627
						1.06168	1.29427	0.658478		0.942952	0.884834	0.475975
						1.06205	1.29523	0.65896		0.944168	0.885495	0.476323
						1.06238	1.29533	0.659441		0.944592	0.885498	0.476671
						1.06287	1.29768	0.659923		0.944931	0.885676	0.477019
						1.06475	1.30062	0.660405		0.945035	0.887116	0.477368
						1.06532	1.30108	0.660886		0.945156	0.887589	0.477716
						1.06599	1.30129	0.661368		0.945348	0.887756	0.478064
						1.06653	1.30218	0.66185		0.945348	0.890731	0.478412
						1.06941	1.30278	0.662331		0.946001	0.891568	0.47876
						1.07359	1.30323	0.662813		0.946232	0.891775	0.479109
						1.07403	1.30324	0.663295		0.947351	0.892028	0.479457
						1.07413	1.30368	0.663776		0.948764	0.892881	0.479805
						1.07593	1.3037	0.664258		0.948917	0.893217	0.480153
						1.07636	1.30404	0.66474		0.949321	0.893327	0.480501
						1.07812	1.30561	0.665222		0.951324	0.893657	0.48085
						1.08037	1.30622	0.665703		0.951661	0.896299	0.481198
						1.08218	1.30623	0.666185		0.95174	0.897451	0.481546
						1.0839	1.30694	0.666667		0.95196	0.898382	0.481894
						1.08697	1.30749	0.667148		0.952688	0.899001	0.482242
						1.08737	1.3089	0.66763		0.953829	0.899416	0.482591
						1.08777	1.30926	0.668112		0.954252	0.899876	0.482939
						1.08799	1.30984	0.668593		0.954482	0.90036	0.483287
						1.08863	1.31145	0.669075		0.954635	0.900527	0.483635
						1.08984	1.31256	0.669557		0.955397	0.901086	0.483983
						1.09021	1.31647	0.670039		0.956358	0.901999	0.484331
						1.09132	1.31753	0.67052		0.95666	0.902138	0.48468
						1.09229	1.31817	0.671002		0.95667	0.902282	0.485028
						1.09263	1.32098	0.671484		0.957261	0.902431	0.485376
						1.093	1.32204	0.671965		0.957394	0.903337	0.485724
						1.09322	1.32258	0.672447		0.958157	0.906029	0.486072
						1.09333	1.33032	0.672929		0.959379	0.906599	0.486421
						1.09355	1.3306	0.67341		0.959508	0.906673	0.486769
						1.09843	1.33165	0.673892		0.960868	0.907625	0.487117
						1.0986	1.33284	0.674374		0.961521	0.907984	0.487465
						1.09938	1.33321	0.674855		0.962359	0.908545	0.487813
						1.10017	1.33383	0.675337		0.962752	0.909112	0.488162
						1.10076	1.33414	0.675819		0.962822	0.909976	0.48851
						1.10076	1.3351	0.676301		0.96328	0.910578	0.488858
						1.10077	1.3354	0.676782		0.964516	0.91099	0.489206
						1.10147	1.33561	0.677264		0.964779	0.911846	0.489554
						1.10274	1.33928	0.677746		0.964848	0.912276	0.489903
						1.10306	1.33985	0.678227		0.965722	0.913011	0.490251
						1.10383	1.34119	0.678709		0.96692	0.913718	0.490599
						1.10543	1.34223	0.679191		0.966988	0.913719	0.490947
						1.10677	1.3424	0.679672		0.967421	0.915007	0.491295
						1.1072	1.34281	0.680154		0.967618	0.915675	0.491643
						1.10949	1.34302	0.680636		0.968434	0.915722	0.491992
						1.11092	1.34508	0.681118		0.968733	0.917059	0.49234
						1.11268	1.34781	0.681599		0.968916	0.917445	0.492688
						1.11413	1.34885	0.682081		0.969458	0.918655	0.493036
						1.11492	1.34892	0.682563		0.970233	0.919025	0.493384
						1.11531	1.35108	0.683044		0.970633	0.919717	0.493733
						1.11574	1.35123	0.683526		0.970694	0.919998	0.494081
						1.11581	1.35234	0.684008		0.971585	0.92044	0.494429
						1.11678	1.35262	0.684489		0.971617	0.920983	0.494777
						1.11689	1.3543	0.684971		0.972323	0.921188	0.495125
						1.11695	1.35505	0.685453		0.972636	0.922094	0.495474
						1.11711	1.36178	0.685934		0.972892	0.92225	0.495822
						1.11782	1.36223	0.686416		0.973159	0.922795	0.49617
						1.11786	1.36298	0.686898		0.97332	0.922878	0.496518
						1.11816	1.36311	0.68738		0.973483	0.92294	0.496866
						1.1187	1.36523	0.687861		0.97377	0.923403	0.497214
						1.11906	1.36602	0.688343		0.97385	0.924294	0.497563
						1.11929	1.36825	0.688825		0.973891	0.924308	0.497911
						1.12182	1.36909	0.689306		0.974005	0.925508	0.498259
						1.12237	1.37181	0.689788		0.975284	0.925744	0.498607
						1.12257	1.37351	0.69027		0.975645	0.925888	0.498955
						1.12287	1.37526	0.690751		0.976539	0.925997	0.499304
						1.12325	1.37537	0.691233		0.976706	0.926363	0.499652
						1.12332	1.37589	0.691715		0.976943	0.927417	0.5
						1.12335	1.37766	0.692197		0.977324	0.92834	0.500348
						1.12343	1.37821	0.692678		0.97757	0.930442	0.500696
						1.12387	1.38008	0.69316		0.977693	0.930708	0.501045
						1.12986	1.38238	0.693642		0.977699	0.931105	0.501393
						1.1301	1.3825	0.694123		0.977889	0.931506	0.501741
						1.13196	1.38836	0.694605		0.978198	0.932413	0.502089
						1.13356	1.38861	0.695087		0.979829	0.932473	0.502437
						1.13449	1.38976	0.695568		0.980493	0.933099	0.502786
						1.13763	1.39104	0.69605		0.982398	0.934112	0.503134
						1.13893	1.39107	0.696532		0.983046	0.934203	0.503482
						1.13953	1.39283	0.697013		0.984044	0.934524	0.50383
						1.14174	1.39309	0.697495		0.984395	0.934612	0.504178
						1.14582	1.39386	0.697977		0.985551	0.935766	0.504526
						1.14668	1.39541	0.698459		0.986926	0.936215	0.504875
						1.14715	1.39708	0.69894		0.988035	0.936739	0.505223
						1.1472	1.39757	0.699422		0.989038	0.937568	0.505571
						1.14806	1.39912	0.699904		0.989107	0.9377	0.505919
						1.14835	1.39996	0.700385		0.989292	0.937716	0.506267
						1.15136	1.40046	0.700867		0.991024	0.938351	0.506616
						1.15138	1.40147	0.701349		0.991198	0.938467	0.506964
						1.15169	1.40348	0.70183		0.992338	0.9392	0.507312
						1.15468	1.40387	0.702312		0.992738	0.939515	0.50766
						1.15511	1.40419	0.702794		0.993572	0.939622	0.508008
						1.15615	1.40652	0.703276		0.994048	0.939651	0.508357
						1.1567	1.40654	0.703757		0.994969	0.941708	0.508705
						1.15806	1.40959	0.704239		0.994978	0.94183	0.509053
						1.15884	1.4104	0.704721		0.995576	0.94389	0.509401
						1.1591	1.41261	0.705202		0.996235	0.944809	0.509749
						1.15931	1.41291	0.705684		0.996929	0.945856	0.510097
						1.16157	1.41293	0.706166		0.997043	0.949524	0.510446
						1.1618	1.4136	0.706647		0.997118	0.949695	0.510794
						1.16511	1.41412	0.707129		0.997939	0.950905	0.511142
						1.16516	1.41427	0.707611		1.00218	0.952662	0.51149
						1.16519	1.41471	0.708092		1.00234	0.953012	0.511838
						1.1656	1.41493	0.708574		1.00242	0.953645	0.512187
						1.16647	1.41597	0.709056		1.00315	0.953752	0.512535
						1.16799	1.41729	0.709538		1.00462	0.95403	0.512883
						1.16844	1.41876	0.710019		1.00502	0.955398	0.513231
						1.16945	1.41898	0.710501		1.00674	0.956655	0.513579
						1.1696	1.42086	0.710983		1.00692	0.956764	0.513928
						1.1715	1.42216	0.711464		1.00718	0.95703	0.514276
						1.1715	1.42237	0.711946		1.00739	0.957201	0.514624
						1.17216	1.42251	0.712428		1.00805	0.957669	0.514972
						1.17323	1.42252	0.712909		1.00875	0.958009	0.51532
						1.17579	1.42268	0.713391		1.00879	0.95807	0.515669
						1.1762	1.42353	0.713873		1.00911	0.95843	0.516017
						1.1781	1.42815	0.714355		1.00933	0.95977	0.516365
						1.17849	1.43478	0.714836		1.0095	0.962332	0.516713
						1.18092	1.43526	0.715318		1.01023	0.96295	0.517061
						1.18097	1.43613	0.7158		1.0113	0.963244	0.517409
						1.18176	1.43757	0.716281		1.01187	0.963345	0.517758
						1.18192	1.44021	0.716763		1.01283	0.963443	0.518106
						1.18389	1.44279	0.717245		1.01414	0.9638	0.518454
						1.18526	1.44617	0.717726		1.01499	0.963856	0.518802
						1.18712	1.44841	0.718208		1.01556	0.964178	0.51915
						1.18853	1.45169	0.71869		1.0162	0.964386	0.519499
						1.18922	1.45169	0.719171		1.01687	0.964884	0.519847
						1.18996	1.4552	0.719653		1.01831	0.964902	0.520195
						1.19143	1.45651	0.720135		1.01902	0.965062	0.520543
						1.19145	1.4573	0.720617		1.02021	0.965106	0.520891
						1.19282	1.45784	0.721098		1.02028	0.965583	0.52124
						1.19507	1.45947	0.72158		1.02082	0.965745	0.521588
						1.19558	1.4595	0.722062		1.02194	0.966214	0.521936
						1.19883	1.46004	0.722543		1.0221	0.96679	0.522284
						1.2021	1.4625	0.723025		1.02437	0.966843	0.522632
						1.20396	1.46283	0.723507		1.0259	0.967011	0.522981
						1.20404	1.46295	0.723988		1.0268	0.96733	0.523329
						1.20475	1.46386	0.72447		1.02695	0.968034	0.523677
						1.20579	1.46415	0.724952		1.02732	0.968049	0.524025
						1.20626	1.46574	0.725434		1.02757	0.968298	0.524373
						1.20633	1.46745	0.725915		1.02766	0.969334	0.524721
						1.20644	1.46987	0.726397		1.02829	0.97015	0.52507
						1.20671	1.47167	0.726879		1.0283	0.970235	0.525418
						1.20696	1.47405	0.72736		1.02887	0.97301	0.525766
						1.20822	1.47465	0.727842		1.02902	0.973344	0.526114
						1.20847	1.47623	0.728324		1.02909	0.973525	0.526462
						1.20878	1.47904	0.728805		1.02921	0.974026	0.526811
						1.20957	1.48066	0.729287		1.03011	0.975648	0.527159
						1.21093	1.48168	0.729769		1.03038	0.977309	0.527507
						1.21164	1.48184	0.73025		1.03068	0.97787	0.527855
						1.2118	1.48353	0.730732		1.03181	0.979042	0.528203
						1.21186	1.48505	0.731214		1.03203	0.979564	0.528552
						1.212	1.4865	0.731696		1.03253	0.979734	0.5289
						1.2132	1.48655	0.732177		1.03278	0.980365	0.529248
						1.21397	1.48751	0.732659		1.03339	0.981785	0.529596
						1.21409	1.49012	0.733141		1.0342	0.982102	0.529944
						1.21416	1.49016	0.733622		1.03474	0.982976	0.530292
						1.21458	1.4906	0.734104		1.03519	0.98361	0.530641
						1.21538	1.49152	0.734586		1.03534	0.983863	0.530989
						1.21575	1.49511	0.735067		1.03556	0.984493	0.531337
						1.21594	1.49582	0.735549		1.03557	0.984989	0.531685
						1.21607	1.49748	0.736031		1.03586	0.985253	0.532033
						1.21668	1.49881	0.736513		1.03603	0.98595	0.532382
						1.21721	1.49936	0.736994		1.03694	0.98595	0.53273
						1.21733	1.5011	0.737476		1.03811	0.98606	0.533078
						1.21758	1.5018	0.737958		1.03833	0.986671	0.533426
						1.21945	1.50191	0.738439		1.0387	0.98714	0.533774
						1.22038	1.50396	0.738921		1.03933	0.987814	0.534123
						1.22076	1.50554	0.739403		1.03957	0.989165	0.534471
						1.22145	1.50624	0.739884		1.04035	0.991018	0.534819
						1.22333	1.50865	0.740366		1.04216	0.991497	0.535167
						1.22358	1.50935	0.740848		1.04257	0.992235	0.535515
						1.22401	1.50973	0.741329		1.04269	0.992318	0.535864
						1.22626	1.51226	0.741811		1.04306	0.992607	0.536212
						1.22929	1.51313	0.742293		1.04428	0.992623	0.53656
						1.22957	1.51486	0.742775		1.04484	0.992727	0.536908
						1.22982	1.51491	0.743256		1.04601	0.992926	0.537256
						1.23273	1.51964	0.743738		1.04648	0.993045	0.537604
						1.2332	1.52397	0.74422		1.04667	0.993549	0.537953
						1.23608	1.52511	0.744701		1.0477	0.993914	0.538301
						1.2378	1.52576	0.745183		1.04825	0.994152	0.538649
						1.23817	1.52581	0.745665		1.04897	0.994517	0.538997
						1.23827	1.52655	0.746146		1.04917	0.99463	0.539345
						1.24017	1.52893	0.746628		1.05042	0.995386	0.539694
						1.24037	1.52907	0.74711		1.05062	0.997656	0.540042
						1.24091	1.53231	0.747592		1.05115	0.997972	0.54039
						1.24124	1.53426	0.748073		1.05115	0.997992	0.540738
						1.24232	1.53435	0.748555		1.05368	0.9985	0.541086
						1.24367	1.53594	0.749037		1.05556	0.99898	0.541435
						1.24833	1.5385	0.749518		1.05612	0.999288	0.541783
						1.24982	1.53924	0.75		1.05836	0.999634	0.542131
						1.25283	1.53927	0.750482		1.05861	1.00031	0.542479
						1.25381	1.54174	0.750963		1.0589	1.00033	0.542827
						1.25738	1.5449	0.751445		1.05965	1.00141	0.543175
						1.25759	1.5459	0.751927		1.05969	1.00144	0.543524
						1.25992	1.54675	0.752408		1.0598	1.00173	0.543872
						1.2605	1.54882	0.75289		1.05987	1.00201	0.54422
						1.26199	1.55027	0.753372		1.06032	1.00248	0.544568
						1.26368	1.55033	0.753854		1.06065	1.00267	0.544916
						1.26457	1.55177	0.754335		1.06177	1.00307	0.545265
						1.26785	1.5519	0.754817		1.06333	1.00624	0.545613
						1.26867	1.55315	0.755299		1.06407	1.00677	0.545961
						1.26886	1.55781	0.75578		1.06456	1.00833	0.546309
						1.27132	1.55838	0.756262		1.06527	1.00875	0.546657
						1.27596	1.55938	0.756744		1.0671	1.00903	0.547006
						1.27641	1.5687	0.757225		1.06722	1.00922	0.547354
						1.27651	1.57483	0.757707		1.06771	1.01062	0.547702
						1.27676	1.57865	0.758189		1.06785	1.01137	0.54805
						1.27743	1.57907	0.758671		1.07003	1.0115	0.548398
						1.27833	1.58007	0.759152		1.07022	1.01343	0.548747
						1.27835	1.58156	0.759634		1.07053	1.01367	0.549095
						1.2791	1.58257	0.760116		1.07162	1.01399	0.549443
						1.27975	1.58416	0.760597		1.07163	1.01459	0.549791
						1.28285	1.58438	0.761079		1.0736	1.01518	0.550139
						1.28478	1.585	0.761561		1.07454	1.01597	0.550487
						1.28583	1.58586	0.762042		1.07478	1.01605	0.550836
						1.28818	1.58962	0.762524		1.0748	1.01673	0.551184
						1.28846	1.59101	0.763006		1.07512	1.01685	0.551532
						1.28898	1.59339	0.763487		1.07543	1.01686	0.55188
						1.28931	1.59451	0.763969		1.07587	1.01694	0.552228
						1.28965	1.59629	0.764451		1.07605	1.01769	0.552577
						1.28986	1.59722	0.764933		1.07834	1.01809	0.552925
						1.29079	1.59771	0.765414		1.07878	1.01907	0.553273
						1.29382	1.59908	0.765896		1.07927	1.01965	0.553621
						1.29599	1.59909	0.766378		1.0794	1.01986	0.553969
						1.29659	1.60109	0.766859		1.08012	1.02132	0.554318
						1.29886	1.60371	0.767341		1.08222	1.02226	0.554666
						1.30575	1.60466	0.767823		1.08296	1.02273	0.555014
						1.30661	1.60728	0.768304		1.0832	1.02383	0.555362
						1.30733	1.62262	0.768786		1.0835	1.02423	0.55571
						1.3077	1.62853	0.769268		1.08358	1.02469	0.556058
						1.30863	1.62889	0.76975		1.0847	1.02539	0.556407
						1.30938	1.63147	0.770231		1.08483	1.02664	0.556755
						1.30989	1.6328	0.770713		1.08628	1.02773	0.557103
						1.31197	1.63488	0.771195		1.08745	1.02793	0.557451
						1.31365	1.63611	0.771676		1.08758	1.02888	0.557799
						1.31708	1.63653	0.772158		1.08761	1.02946	0.558148
						1.31712	1.6399	0.77264		1.08919	1.02972	0.558496
						1.31946	1.64114	0.773121		1.09101	1.02983	0.558844
						1.32212	1.64133	0.773603		1.09167	1.03071	0.559192
						1.32285	1.64188	0.774085		1.0918	1.03225	0.55954
						1.32401	1.64196	0.774566		1.09193	1.03327	0.559889
						1.33006	1.64308	0.775048		1.0931	1.03507	0.560237
						1.33015	1.64435	0.77553		1.0939	1.03734	0.560585
						1.33128	1.64506	0.776012		1.09418	1.03925	0.560933
						1.33401	1.64707	0.776493		1.09504	1.0406	0.561281
						1.33544	1.64967	0.776975		1.09541	1.04163	0.56163
						1.33581	1.65118	0.777457		1.09619	1.04239	0.561978
						1.33765	1.6542	0.777938		1.09802	1.04267	0.562326
						1.33884	1.65515	0.77842		1.09915	1.04357	0.562674
						1.33885	1.65882	0.778902		1.09937	1.0441	0.563022
						1.33909	1.66143	0.779383		1.09948	1.04473	0.56337
						1.33989	1.66372	0.779865		1.09995	1.04505	0.563719
						1.3423	1.66802	0.780347		1.10112	1.04686	0.564067
						1.34484	1.66984	0.780829		1.10171	1.04806	0.564415
						1.34501	1.67022	0.78131		1.10238	1.04914	0.564763
						1.34758	1.67652	0.781792		1.10298	1.04956	0.565111
						1.34858	1.67804	0.782274		1.10311	1.05049	0.56546
						1.34871	1.67806	0.782755		1.10388	1.05342	0.565808
						1.35012	1.68006	0.783237		1.1049	1.05503	0.566156
						1.35061	1.68137	0.783719		1.10565	1.05536	0.566504
						1.35081	1.68655	0.7842		1.1067	1.05649	0.566852
						1.35126	1.68895	0.784682		1.10693	1.05677	0.567201
						1.35978	1.69115	0.785164		1.10721	1.05721	0.567549
						1.36036	1.69397	0.785645		1.10757	1.0573	0.567897
						1.36087	1.69533	0.786127		1.1076	1.0591	0.568245
						1.36567	1.69691	0.786609		1.10899	1.05946	0.568593
						1.3661	1.69821	0.787091		1.11028	1.06028	0.568942
						1.36823	1.70113	0.787572		1.11032	1.06081	0.56929
						1.36906	1.7017	0.788054		1.11058	1.06096	0.569638
						1.37318	1.70557	0.788536		1.11063	1.06161	0.569986
						1.3755	1.70606	0.789017		1.1107	1.06188	0.570334
						1.37593	1.70633	0.789499		1.11095	1.06193	0.570682
						1.37825	1.70784	0.789981		1.11236	1.06199	0.571031
						1.3809	1.70827	0.790462		1.11245	1.0628	0.571379
						1.38191	1.7101	0.790944		1.11272	1.06607	0.571727
						1.38317	1.71176	0.791426		1.113	1.06659	0.572075
						1.38423	1.71542	0.791908		1.11392	1.06783	0.572423
						1.38615	1.71565	0.792389		1.11411	1.06808	0.572772
						1.38655	1.72327	0.792871		1.11424	1.06874	0.57312
						1.38827	1.72515	0.793353		1.11732	1.06923	0.573468
						1.38871	1.72541	0.793834		1.11734	1.07159	0.573816
						1.38913	1.72994	0.794316		1.1177	1.07176	0.574164
						1.39109	1.73003	0.794798		1.11776	1.07197	0.574513
						1.39269	1.73176	0.795279		1.11864	1.07242	0.574861
						1.3932	1.73838	0.795761		1.11934	1.07251	0.575209
						1.39346	1.73863	0.796243		1.12034	1.07452	0.575557
						1.39354	1.73975	0.796724		1.12131	1.0752	0.575905
						1.39397	1.74022	0.797206		1.12216	1.07521	0.576253
						1.3974	1.74122	0.797688		1.12303	1.07605	0.576602
						1.39786	1.74198	0.79817		1.12306	1.07623	0.57695
						1.40632	1.74258	0.798651		1.12499	1.07639	0.577298
						1.40732	1.74316	0.799133		1.12555	1.07746	0.577646
						1.40843	1.75101	0.799615		1.12646	1.07868	0.577994
						1.4092	1.75581	0.800096		1.12876	1.07884	0.578343
						1.40984	1.75907	0.800578		1.12982	1.07895	0.578691
						1.40989	1.75987	0.80106		1.13061	1.07899	0.579039
						1.41003	1.76212	0.801541		1.13083	1.07909	0.579387
						1.41147	1.76382	0.802023		1.1312	1.07919	0.579735
						1.41189	1.76806	0.802505		1.13134	1.08015	0.580084
						1.41282	1.77588	0.802987		1.13149	1.08023	0.580432
						1.41298	1.77616	0.803468		1.13261	1.0806	0.58078
						1.41453	1.77677	0.80395		1.13282	1.08071	0.581128
						1.41592	1.78005	0.804432		1.13288	1.0818	0.581476
						1.41642	1.78535	0.804913		1.13324	1.08207	0.581825
						1.41956	1.78558	0.805395		1.13328	1.08242	0.582173
						1.42108	1.78736	0.805877		1.13422	1.08283	0.582521
						1.42624	1.78795	0.806358		1.13442	1.08307	0.582869
						1.42645	1.79104	0.80684		1.13871	1.08522	0.583217
						1.42938	1.79117	0.807322		1.13961	1.08541	0.583565
						1.43032	1.79749	0.807803		1.1399	1.08617	0.583914
						1.43297	1.79822	0.808285		1.14272	1.08703	0.584262
						1.44103	1.7995	0.808767		1.14377	1.08721	0.58461
						1.4416	1.81006	0.809249		1.14689	1.0876	0.584958
						1.44693	1.81307	0.80973		1.14737	1.08765	0.585306
						1.44987	1.81618	0.810212		1.1477	1.08808	0.585655
						1.45166	1.81892	0.810694		1.14822	1.08892	0.586003
						1.46001	1.82095	0.811175		1.14961	1.08923	0.586351
						1.46023	1.82485	0.811657		1.15119	1.09054	0.586699
						1.46193	1.82647	0.812139		1.15127	1.09104	0.587047
						1.46477	1.82776	0.81262		1.15168	1.09122	0.587396
						1.46525	1.83124	0.813102		1.15363	1.09238	0.587744
						1.46722	1.83233	0.813584		1.15383	1.09238	0.588092
						1.46913	1.83314	0.814066		1.15431	1.09306	0.58844
						1.47107	1.83507	0.814547		1.15464	1.0932	0.588788
						1.47219	1.83561	0.815029		1.15481	1.09425	0.589136
						1.47493	1.836	0.815511		1.1552	1.09439	0.589485
						1.47692	1.83653	0.815992		1.15588	1.09569	0.589833
						1.4778	1.838	0.816474		1.15614	1.09616	0.590181
						1.47795	1.84022	0.816956		1.15633	1.09787	0.590529
						1.4793	1.84481	0.817437		1.15708	1.09805	0.590877
						1.4806	1.85517	0.817919		1.15732	1.10056	0.591226
						1.48245	1.85634	0.818401		1.1575	1.10131	0.591574
						1.48473	1.8592	0.818882		1.15802	1.10145	0.591922
						1.48557	1.86146	0.819364		1.15902	1.10186	0.59227
						1.48868	1.86672	0.819846		1.15916	1.10194	0.592618
						1.48964	1.86893	0.820328		1.16023	1.10509	0.592967
						1.49272	1.8748	0.820809		1.16235	1.10566	0.593315
						1.49544	1.88301	0.821291		1.16347	1.10597	0.593663
						1.49627	1.88358	0.821773		1.16358	1.10782	0.594011
						1.49678	1.8889	0.822254		1.16442	1.1086	0.594359
						1.4971	1.88982	0.822736		1.16469	1.10985	0.594708
						1.50018	1.89146	0.823218		1.16472	1.11034	0.595056
						1.50109	1.89161	0.823699		1.16476	1.11061	0.595404
						1.50488	1.89223	0.824181		1.16731	1.11196	0.595752
						1.51062	1.90037	0.824663		1.16893	1.11232	0.5961
						1.51065	1.90457	0.825145		1.16904	1.11287	0.596448
						1.51097	1.90892	0.825626		1.17017	1.11299	0.596797
						1.51238	1.91945	0.826108		1.17103	1.11351	0.597145
						1.51373	1.92194	0.82659		1.17136	1.11414	0.597493
						1.51396	1.92648	0.827071		1.17162	1.11435	0.597841
						1.5182	1.92687	0.827553		1.17175	1.11466	0.598189
						1.52455	1.92963	0.828035		1.17455	1.11475	0.598538
						1.5249	1.92976	0.828516		1.17529	1.11476	0.598886
						1.52792	1.92985	0.828998		1.17532	1.11539	0.599234
						1.52913	1.93008	0.82948		1.17622	1.11659	0.599582
						1.53473	1.93216	0.829961		1.17637	1.11686	0.59993
						1.53574	1.93317	0.830443		1.17661	1.11789	0.600279
						1.53764	1.93509	0.830925		1.17797	1.11802	0.600627
						1.53994	1.93534	0.831407		1.17821	1.11825	0.600975
						1.54006	1.94147	0.831888		1.1788	1.11898	0.601323
						1.5436	1.94464	0.83237		1.17957	1.12037	0.601671
						1.54455	1.94716	0.832852		1.18116	1.12089	0.602019
						1.54685	1.9497	0.833333		1.18195	1.12122	0.602368
						1.54711	1.95208	0.833815		1.18487	1.12158	0.602716
						1.54871	1.95481	0.834297		1.18569	1.12259	0.603064
						1.55283	1.95615	0.834778		1.18595	1.12379	0.603412
						1.55695	1.95887	0.83526		1.1861	1.12418	0.60376
						1.55814	1.95956	0.835742		1.18692	1.12512	0.604109
						1.55814	1.96262	0.836224		1.18788	1.12537	0.604457
						1.55911	1.966	0.836705		1.18942	1.12548	0.604805
						1.56046	1.97001	0.837187		1.18998	1.12656	0.605153
						1.56163	1.97032	0.837669		1.19139	1.12862	0.605501
						1.56468	1.97253	0.83815		1.19288	1.12959	0.60585
						1.57506	1.9732	0.838632		1.19455	1.12992	0.606198
						1.57513	1.97381	0.839114		1.19469	1.13119	0.606546
						1.577	1.97507	0.839595		1.1952	1.13197	0.606894
						1.57762	1.97756	0.840077		1.1963	1.13356	0.607242
						1.57874	1.98574	0.840559		1.19885	1.13471	0.607591
						1.57876	1.98959	0.84104		1.19901	1.13598	0.607939
						1.57958	1.99116	0.841522		1.19948	1.13694	0.608287
						1.58565	1.99419	0.842004		1.19988	1.13696	0.608635
						1.58659	1.99428	0.842486		1.2007	1.13741	0.608983
						1.58677	1.99513	0.842967		1.2015	1.13871	0.609331
						1.58728	1.99878	0.843449		1.20159	1.14063	0.60968
						1.59027	2.00409	0.843931		1.20211	1.14132	0.610028
						1.59335	2.00706	0.844412		1.20219	1.14189	0.610376
						1.59553	2.00876	0.844894		1.20242	1.1421	0.610724
						1.59717	2.00917	0.845376		1.20256	1.14233	0.611072
						1.60161	2.01082	0.845857		1.20285	1.14435	0.611421
						1.60211	2.01194	0.846339		1.20304	1.14454	0.611769
						1.61023	2.01452	0.846821		1.20458	1.14505	0.612117
						1.61167	2.0183	0.847303		1.20512	1.14551	0.612465
						1.61869	2.02318	0.847784		1.20659	1.14572	0.612813
						1.62713	2.02393	0.848266		1.20885	1.1464	0.613162
						1.62788	2.03689	0.848748		1.20904	1.14691	0.61351
						1.62925	2.04332	0.849229		1.20939	1.14733	0.613858
						1.63199	2.04363	0.849711		1.21009	1.1477	0.614206
						1.63539	2.04391	0.850193		1.21147	1.14809	0.614554
						1.64169	2.04468	0.850674		1.21277	1.1482	0.614903
						1.64275	2.04812	0.851156		1.21337	1.14825	0.615251
						1.6462	2.05718	0.851638		1.21449	1.1484	0.615599
						1.64719	2.06167	0.852119		1.21476	1.14962	0.615947
						1.64774	2.06339	0.852601		1.21492	1.15039	0.616295
						1.64777	2.06402	0.853083		1.21533	1.15089	0.616643
						1.64834	2.06523	0.853565		1.21574	1.15094	0.616992
						1.65344	2.06596	0.854046		1.2173	1.1522	0.61734
						1.65415	2.06603	0.854528		1.21734	1.15383	0.617688
						1.65416	2.06802	0.85501		1.21779	1.1546	0.618036
						1.6605	2.06899	0.855491		1.21902	1.15654	0.618384
						1.66246	2.06927	0.855973		1.22056	1.15697	0.618733
						1.66332	2.07206	0.856455		1.22153	1.15876	0.619081
						1.66378	2.07263	0.856936		1.22228	1.15906	0.619429
						1.6668	2.09332	0.857418		1.22246	1.16053	0.619777
						1.66841	2.09895	0.8579		1.22251	1.16153	0.620125
						1.67843	2.10014	0.858382		1.22262	1.16258	0.620474
						1.67935	2.10275	0.858863		1.22361	1.16261	0.620822
						1.68489	2.1078	0.859345		1.2247	1.16279	0.62117
						1.68495	2.10838	0.859827		1.22615	1.16504	0.621518
						1.6912	2.10912	0.860308		1.22672	1.16604	0.621866
						1.69421	2.11114	0.86079		1.22721	1.16656	0.622214
						1.6947	2.11369	0.861272		1.22732	1.16795	0.622563
						1.69521	2.11894	0.861753		1.22813	1.16953	0.622911
						1.69689	2.12807	0.862235		1.2286	1.17009	0.623259
						1.69984	2.13456	0.862717		1.23077	1.1703	0.623607
						1.70034	2.13604	0.863198		1.23118	1.17266	0.623955
						1.70074	2.14012	0.86368		1.23146	1.17336	0.624304
						1.70287	2.14127	0.864162		1.2315	1.17545	0.624652
						1.70743	2.1413	0.864644		1.23174	1.17623	0.625
						1.70912	2.14579	0.865125		1.23248	1.17651	0.625348
						1.70958	2.15065	0.865607		1.2329	1.17997	0.625696
						1.71099	2.1615	0.866089		1.23622	1.18033	0.626045
						1.71308	2.1616	0.86657		1.2363	1.18069	0.626393
						1.71423	2.16616	0.867052		1.23767	1.18101	0.626741
						1.72499	2.16778	0.867534		1.23774	1.18119	0.627089
						1.72538	2.16845	0.868015		1.23809	1.18126	0.627437
						1.73323	2.16854	0.868497		1.23875	1.18207	0.627786
						1.73735	2.17132	0.868979		1.23949	1.18227	0.628134
						1.7401	2.17705	0.869461		1.23982	1.18319	0.628482
						1.74759	2.18347	0.869942		1.23992	1.18395	0.62883
						1.75597	2.18769	0.870424		1.24143	1.18431	0.629178
						1.75705	2.18821	0.870906		1.24194	1.1853	0.629526
						1.75712	2.18925	0.871387		1.24309	1.18677	0.629875
						1.76201	2.1913	0.871869		1.24382	1.18801	0.630223
						1.76295	2.19172	0.872351		1.24418	1.18855	0.630571
						1.76344	2.19194	0.872832		1.24477	1.18998	0.630919
						1.76481	2.19288	0.873314		1.2454	1.1906	0.631267
						1.76634	2.19328	0.873796		1.2458	1.19089	0.631616
						1.77144	2.19398	0.874277		1.24653	1.19144	0.631964
						1.77521	2.19563	0.874759		1.2475	1.19352	0.632312
						1.77696	2.19814	0.875241		1.24789	1.19382	0.63266
						1.77742	2.19968	0.875723		1.24844	1.19497	0.633008
						1.78021	2.20158	0.876204		1.24875	1.19547	0.633357
						1.78096	2.20356	0.876686		1.24983	1.19579	0.633705
						1.78769	2.20778	0.877168		1.2505	1.19611	0.634053
						1.792	2.2125	0.877649		1.25124	1.19628	0.634401
						1.79381	2.2177	0.878131		1.25155	1.19831	0.634749
						1.79579	2.22235	0.878613		1.25238	1.19857	0.635097
						1.796	2.22303	0.879094		1.25523	1.19996	0.635446
						1.7974	2.23291	0.879576		1.25543	1.20191	0.635794
						1.79943	2.24179	0.880058		1.26036	1.20352	0.636142
						1.80315	2.2454	0.880539		1.26083	1.20466	0.63649
						1.80383	2.24612	0.881021		1.26174	1.20482	0.636838
						1.80769	2.24648	0.881503		1.26177	1.20594	0.637187
						1.81332	2.24755	0.881985		1.26229	1.20601	0.637535
						1.81444	2.24861	0.882466		1.26289	1.2075	0.637883
						1.81549	2.24991	0.882948		1.26359	1.20844	0.638231
						1.81729	2.25412	0.88343		1.26634	1.20863	0.638579
						1.81874	2.25433	0.883911		1.26699	1.2101	0.638928
						1.82346	2.25437	0.884393		1.26738	1.21073	0.639276
						1.82386	2.2546	0.884875		1.26815	1.21107	0.639624
						1.82423	2.25527	0.885356		1.26836	1.2129	0.639972
						1.8296	2.25533	0.885838		1.26893	1.21314	0.64032
						1.83334	2.25663	0.88632		1.27095	1.21334	0.640669
						1.83536	2.25872	0.886802		1.27126	1.21489	0.641017
						1.84315	2.25978	0.887283		1.27205	1.21527	0.641365
						1.84583	2.27357	0.887765		1.2729	1.21575	0.641713
						1.85145	2.2771	0.888247		1.27363	1.21656	0.642061
						1.85329	2.27882	0.888728		1.27464	1.21724	0.642409
						1.85555	2.27979	0.88921		1.27556	1.21786	0.642758
						1.8591	2.28163	0.889692		1.27761	1.21913	0.643106
						1.85947	2.2831	0.890173		1.27857	1.22059	0.643454
						1.86022	2.28646	0.890655		1.27921	1.22079	0.643802
						1.8619	2.29077	0.891137		1.27922	1.22205	0.64415
						1.86193	2.29165	0.891618		1.27993	1.22213	0.644499
						1.8624	2.29706	0.8921		1.2802	1.22374	0.644847
						1.86501	2.30962	0.892582		1.28027	1.2241	0.645195
						1.86627	2.31354	0.893064		1.28033	1.2248	0.645543
						1.86874	2.31915	0.893545		1.28139	1.22555	0.645891
						1.8858	2.32607	0.894027		1.28165	1.22562	0.64624
						1.88815	2.32636	0.894509		1.28425	1.22723	0.646588
						1.89004	2.33858	0.89499		1.28518	1.22748	0.646936
						1.89102	2.34769	0.895472		1.28604	1.22777	0.647284
						1.89308	2.34999	0.895954		1.28778	1.22814	0.647632
						1.8949	2.35067	0.896435		1.28829	1.22929	0.647981
						1.89709	2.35166	0.896917		1.2885	1.22989	0.648329
						1.90551	2.35312	0.897399		1.28927	1.2299	0.648677
						1.91044	2.36137	0.897881		1.2919	1.23101	0.649025
						1.91504	2.36483	0.898362		1.29333	1.23318	0.649373
						1.91739	2.3702	0.898844		1.29375	1.23432	0.649721
						1.91869	2.3738	0.899326		1.29378	1.23471	0.65007
						1.91918	2.37652	0.899807		1.29552	1.23475	0.650418
						1.92107	2.37956	0.900289		1.2964	1.23595	0.650766
						1.92447	2.38285	0.900771		1.29652	1.23956	0.651114
						1.92694	2.38655	0.901252		1.29665	1.24042	0.651462
						1.9305	2.38691	0.901734		1.29683	1.24117	0.651811
						1.94011	2.3943	0.902216		1.29756	1.24139	0.652159
						1.95935	2.39593	0.902697		1.29785	1.24145	0.652507
						1.96872	2.39718	0.903179		1.29935	1.24247	0.652855
						1.96997	2.40214	0.903661		1.29985	1.24271	0.653203
						1.97432	2.40393	0.904143		1.30011	1.24317	0.653552
						1.97811	2.42499	0.904624		1.30017	1.24357	0.6539
						1.97885	2.43417	0.905106		1.30105	1.24412	0.654248
						1.97979	2.436	0.905588		1.30145	1.24432	0.654596
						1.98038	2.44581	0.906069		1.30343	1.24506	0.654944
						1.98116	2.45313	0.906551		1.30471	1.2454	0.655292
						1.98289	2.45448	0.907033		1.3051	1.2458	0.655641
						1.98521	2.45556	0.907514		1.3068	1.24638	0.655989
						1.98991	2.47115	0.907996		1.30715	1.25022	0.656337
						2.00361	2.47226	0.908478		1.30786	1.25059	0.656685
						2.01189	2.47449	0.90896		1.30821	1.25219	0.657033
						2.01208	2.47953	0.909441		1.3101	1.25266	0.657382
						2.02871	2.48108	0.909923		1.31232	1.25451	0.65773
						2.04375	2.48724	0.910405		1.31236	1.25548	0.658078
						2.0512	2.48849	0.910886		1.31285	1.25741	0.658426
						2.05563	2.49006	0.911368		1.31314	1.25832	0.658774
						2.0578	2.49718	0.91185		1.31333	1.25927	0.659123
						2.05933	2.49815	0.912331		1.31629	1.26214	0.659471
						2.06341	2.49839	0.912813		1.31689	1.26296	0.659819
						2.07735	2.49982	0.913295		1.31794	1.26405	0.660167
						2.08028	2.50069	0.913776		1.31826	1.26452	0.660515
						2.08324	2.50472	0.914258		1.31845	1.26575	0.660864
						2.0866	2.505	0.91474		1.32025	1.2662	0.661212
						2.08901	2.5165	0.915222		1.321	1.26845	0.66156
						2.08988	2.53791	0.915703		1.32154	1.26884	0.661908
						2.09865	2.53825	0.916185		1.32237	1.26898	0.662256
						2.10086	2.54088	0.916667		1.32323	1.26917	0.662604
						2.10158	2.54497	0.917148		1.32327	1.26936	0.662953
						2.11031	2.55692	0.91763		1.32411	1.27008	0.663301
						2.11067	2.55747	0.918112		1.3246	1.2705	0.663649
						2.11575	2.55925	0.918593		1.32591	1.27069	0.663997
						2.11623	2.56563	0.919075		1.32599	1.27177	0.664345
						2.12414	2.56776	0.919557		1.32662	1.27465	0.664694
						2.13369	2.57755	0.920039		1.32698	1.2757	0.665042
						2.13737	2.57801	0.92052		1.32712	1.27604	0.66539
						2.14931	2.5932	0.921002		1.32808	1.27649	0.665738
						2.15249	2.59941	0.921484		1.32959	1.27822	0.666086
						2.15306	2.60711	0.921965		1.32961	1.27988	0.666435
						2.15352	2.61891	0.922447		1.32977	1.27994	0.666783
						2.15611	2.62668	0.922929		1.33022	1.28022	0.667131
						2.15745	2.63016	0.92341		1.333	1.28066	0.667479
						2.15845	2.63198	0.923892		1.33511	1.28089	0.667827
						2.16306	2.63622	0.924374		1.33519	1.28144	0.668175
						2.16711	2.63884	0.924855		1.33561	1.28157	0.668524
						2.17277	2.6425	0.925337		1.3361	1.28243	0.668872
						2.17889	2.64367	0.925819		1.33652	1.28328	0.66922
						2.19289	2.64798	0.926301		1.33683	1.28375	0.669568
						2.19632	2.65727	0.926782		1.33708	1.28483	0.669916
						2.19964	2.66149	0.927264		1.33762	1.28667	0.670265
						2.20804	2.67257	0.927746		1.33897	1.2867	0.670613
						2.23553	2.68574	0.928227		1.33951	1.28747	0.670961
						2.2365	2.68612	0.928709		1.33964	1.28782	0.671309
						2.25212	2.69189	0.929191		1.34045	1.28882	0.671657
						2.25705	2.69519	0.929672		1.34113	1.2911	0.672006
						2.26413	2.70447	0.930154		1.34135	1.29198	0.672354
						2.26639	2.70538	0.930636		1.34199	1.29207	0.672702
						2.26985	2.71262	0.931118		1.34238	1.293	0.67305
						2.27844	2.71422	0.931599		1.34295	1.29304	0.673398
						2.28299	2.71554	0.932081		1.34475	1.29353	0.673747
						2.2884	2.72043	0.932563		1.34608	1.29471	0.674095
						2.29595	2.72257	0.933044		1.34686	1.29813	0.674443
						2.30037	2.7379	0.933526		1.3477	1.29909	0.674791
						2.30213	2.74593	0.934008		1.34787	1.29933	0.675139
						2.30363	2.74742	0.934489		1.34967	1.30135	0.675487
						2.31526	2.74797	0.934971		1.35058	1.30313	0.675836
						2.31979	2.74857	0.935453		1.35061	1.30587	0.676184
						2.33219	2.75121	0.935934		1.35145	1.30641	0.676532
						2.35609	2.77995	0.936416		1.35269	1.30725	0.67688
						2.35644	2.80283	0.936898		1.35406	1.30952	0.677228
						2.37183	2.80576	0.93738		1.35729	1.31061	0.677577
						2.37727	2.81021	0.937861		1.35778	1.31208	0.677925
						2.37984	2.81097	0.938343		1.35802	1.31213	0.678273
						2.38052	2.81301	0.938825		1.35823	1.31299	0.678621
						2.39345	2.81338	0.939306		1.3588	1.31324	0.678969
						2.39951	2.81399	0.939788		1.36004	1.31505	0.679318
						2.41685	2.82941	0.94027		1.36132	1.31569	0.679666
						2.41863	2.83094	0.940751		1.36188	1.31717	0.680014
						2.42132	2.8478	0.941233		1.362	1.31778	0.680362
						2.44057	2.85638	0.941715		1.3621	1.3178	0.68071
						2.46333	2.85657	0.942197		1.36276	1.31866	0.681058
						2.47022	2.86225	0.942678		1.36278	1.32008	0.681407
						2.47891	2.86957	0.94316		1.36334	1.32051	0.681755
						2.47908	2.87016	0.943642		1.36337	1.321	0.682103
						2.49279	2.87982	0.944123		1.36439	1.32185	0.682451
						2.49684	2.88308	0.944605		1.3676	1.32228	0.682799
						2.51152	2.88797	0.945087		1.36803	1.3237	0.683148
						2.51606	2.88912	0.945568		1.36804	1.32445	0.683496
						2.52294	2.90022	0.94605		1.36861	1.32465	0.683844
						2.52798	2.91678	0.946532		1.36959	1.32505	0.684192
						2.55392	2.92454	0.947013		1.37018	1.32678	0.68454
						2.55482	2.93193	0.947495		1.37127	1.32682	0.684889
						2.55588	2.93269	0.947977		1.37471	1.3271	0.685237
						2.56615	2.93439	0.948459		1.37502	1.32756	0.685585
						2.57176	2.93621	0.94894		1.37713	1.32783	0.685933
						2.57317	2.93642	0.949422		1.3782	1.32816	0.686281
						2.57894	2.94065	0.949904		1.37955	1.32845	0.68663
						2.59445	2.94507	0.950385		1.38021	1.32861	0.686978
						2.60528	2.96175	0.950867		1.38274	1.33153	0.687326
						2.60951	2.97919	0.951349		1.38316	1.33172	0.687674
						2.643	2.99111	0.95183		1.38328	1.33253	0.688022
						2.64474	3.01346	0.952312		1.38435	1.33278	0.68837
						2.65388	3.02189	0.952794		1.38438	1.33281	0.688719
						2.6567	3.03147	0.953276		1.38669	1.33297	0.689067
						2.67619	3.03802	0.953757		1.38803	1.33452	0.689415
						2.67687	3.0396	0.954239		1.38916	1.33482	0.689763
						2.68385	3.04243	0.954721		1.39043	1.33506	0.690111
						2.6956	3.04248	0.955202		1.39482	1.33555	0.69046
						2.712	3.04568	0.955684		1.39563	1.33582	0.690808
						2.73492	3.04914	0.956166		1.3957	1.33633	0.691156
						2.80181	3.05063	0.956647		1.39602	1.33675	0.691504
						2.80474	3.05262	0.957129		1.39685	1.33747	0.691852
						2.80542	3.05828	0.957611		1.39745	1.33776	0.692201
						2.81067	3.05927	0.958092		1.39783	1.33801	0.692549
						2.81147	3.0623	0.958574		1.39926	1.33807	0.692897
						2.82323	3.07009	0.959056		1.40134	1.33886	0.693245
						2.82329	3.0766	0.959538		1.40362	1.33938	0.693593
						2.82622	3.08395	0.960019		1.40413	1.34079	0.693942
						2.84672	3.09874	0.960501		1.40425	1.34205	0.69429
						2.84745	3.0988	0.960983		1.40439	1.34245	0.694638
[truncated: 877 more rows]
