# Supplementary material for: Endocytic trafficking determines cellular tolerance of presynaptic opioid signaling
Source: eLife. 2022 Nov 15;11:e81298. doi: 10.7554/eLife.81298 (PMC9708073; doi:10.7554/eLife.81298)
Supplement: Figure 4—source data 1. [file elife-81298-fig4-data1.xlsx]

## Sheet: Panels C D E
Panel C						Panel D											Panel E
	Ratio						Ratio										Ratio
																		DAMGO CHRONIC		DPDPE CHRONIC
			DOR Desensitization					MOR Acute	MOR Chronic	DOR Acute	DOR chronic							DADPDA		DPDADP
			1st	2nd														DPDPE	DAMGO	DAMGO	DPDPE
	av		0.181008	0.170387			av	0.25467	0.537589	0.208879	0.792265						av	0.408998	0.54145	0.339133	0.602742
			0.165515	0.11961				0.30049	0.397738	0.297902	0.960324							0.546573	0.475911	0.240027	0.611599
			0.175624	0.222708				0.304386	0.473213	0.394612	0.793837							0.477071	0.64463	0.348865	0.694681
			0.262413	0.205735				0.465007	0.809701	0.213832	0.885164							0.62281	0.556081	0.27143	0.370287
			0.037169	0.119279				0.176398	0.479961	0.242427	0.764901							0.308416	0.468032	0.303722	0.40864
			0.222358	0.326162				0.143182	0.618356	0.113374	0.769522							0.238479	0.366703	0.410499	0.437858
			0.172629	-0.0478871				0.285835	0.551683	0.225281	0.8509							0.111685	0.341214	0.456917	0.704882
			0.231351	0.247103				0.496858	0.782996	0.0980935	0.737119							0.509878	0.504323	0.753755	0.909902
								0.341693	0.485587	0.238199	0.700492							0.263425	0.83604	0.193927	0.484233
	% inhibition		1	2				0.461279	0.544917	0.0685094	0.772902							0.133839	0.340779	0.219954	0.71443
			83.4485	88.039				0.245105	0.508751	0.196559	0.712074							0.645337	0.781857	0.442303	0.755565
			82.4376	77.7292				0.31897	0.401492		0.767684							0.451859	0.616882	0.313799	0.821893
			73.7587	79.4265				0.237863	0.435273									0.459331	0.409588	0.114403	0.318937
			96.2831	88.0721				0.261793	0.498985									0.550288	0.679604
			77.7642	67.3838				0.0592234										0.406977	0.558654
			82.7371	104.789				0.0445433
			76.8649	75.2897				0.155658
								0.207181
			81.8992	82.9613				0.236624
			2.75594	4.55057				0.17092										DAMGO CHRONIC		DPDPE CHRONIC
								0.180385						ttest unpaired				DADPDA		DPDADP				ttest
																		DPDPE	DAMGO	DAMGO	DPDPE			DA - DP/DA	0.00946727	paired	**					0.5	1.5	0.5	1.5
						% inhibition		MORA	MORD	DORA	DORD			DORA/MORA	0.315721			45.3427	52.4089	75.9973	38.8401			DP - DA/DP	9.43291e-05	paired	***					45.3427	52.4089	75.9973	38.8401
								69.951	60.2262	70.2098	3.96755			DORA/DORD	4.30645e-12			52.2929	35.537	65.1135	30.5319											52.2929	35.537	65.1135	30.5319
								69.5614	52.6787	60.5388	20.6163			MORA/MORD	5.10987e-07			37.719	44.3919	72.857	62.9713			DP1 - DP2	0.0123272	not paired	*					37.719	44.3919	72.857	62.9713
								53.4993	19.0299	78.6168	11.4836			MORD/DORD	1.00749e-05			69.1584	53.1968	69.6278	59.136			DA1 - DA2	0.00392979	not paired	**					69.1584	53.1968	69.6278	59.136
								82.3602	52.0039	75.7573	23.5099							76.1521	63.3297	58.9501	56.2142											76.1521	63.3297	58.9501	56.2142
								85.6818	38.1644	88.6626	23.0478							88.8315	65.8786	54.3083	29.5118											88.8315	65.8786	54.3083	29.5118
								71.4165	44.8317	77.4719	14.91							49.0122	49.5677	24.6245	9.0098											49.0122	49.5677	24.6245	9.0098
								50.3142	21.7004	90.1907	26.2881							73.6575	16.396	80.6073	51.5767											73.6575	16.396	80.6073	51.5767
								65.8307	51.4413	76.1801	29.9508							86.6161	65.9221	78.0046	28.557											86.6161	65.9221	78.0046	28.557
								53.8721	45.5083	93.1491	22.7098							35.4663	21.8143	55.7697	24.4435											35.4663	21.8143	55.7697	24.4435
								75.4895	49.1249	80.3441	28.7926							54.8141	38.3118	68.6201	17.8107											54.8141	38.3118	68.6201	17.8107
								68.103	59.8508		23.2316							54.0669	59.0412	88.5597	68.1063											54.0669	59.0412	88.5597	68.1063
								76.2137	56.4727									44.9712	32.0396													44.9712	32.0396
								73.8207	50.1015									59.3023	44.1346													59.3023	44.1346
								94.0777
								95.5457
								84.4342									n	14		12
								79.2819
								76.3376									av	59.1002	45.855	66.0867	39.7258
								82.908									sem	4.59419	4.19224	4.79669	5.57765
								81.9615
Insets, MOR acute and MOR chronic reploted from Fig 1
		Frame
DOR acute		-58	-57	-56	-55	-54	-53	-52	-51	-50	-49	-48	-47	-46	-45	-44	-43	-42	-41	-40	-39	-38	-37	-36	-35	-34	-33	-32	-31	-30	-29	-28	-27	-26	-25	-24	-23	-22	-21	-20	-19	-18	-17	-16	-15	-14	-13	-12	-11
Baseline		0.00645437	0.00492812	0.00576916	0.00472513	0.00600191	0.00443905	0.0035297	0.00554751	0.000303334	0.00409334	0.00737628	0.00841691	0.00409811	0.00570968	0.00507393	0.00110245	0.00615339	0.000848806	0.00115817	0.0022334	0.0079084	0.00435286	0.00436753	0.00872476	0.00294062	0.00120249	0.00535627	0.00408	0.00213471	0.00257387	0.00190511	0.0012154	0.000357931	0.00494455	-0.000398285	0.00169591	0.00189208	-0.00192969	0.00112211	0.00520371	0.00116629	0.000259543	5.98021e-05	-0.00304312	0.000265881	0.000339793	0.0039463	-0.00034993
Baseline sem		0.00284579	0.00286058	0.00278318	0.00277953	0.00269825	0.0026658	0.00266441	0.00258579	0.0025659	0.00252126	0.00250731	0.00245738	0.00239552	0.00228217	0.0022097	0.00231845	0.00215696	0.00214007	0.0020945	0.00207189	0.00207032	0.00210738	0.00206114	0.00200295	0.00195147	0.0018966	0.00182934	0.00185717	0.00181681	0.00176786	0.00171868	0.00166834	0.00164376	0.00162401	0.00159361	0.00158596	0.00155535	0.00148309	0.0014275	0.00137691	0.00137684	0.00126104	0.00123824	0.0011924	0.00122834	0.00107575	0.0010765	0.00107583
DADLE		0.0825675	0.0579814	0.0420493	0.0334697	0.0272554	0.020933	0.0225072	0.0222863	0.0217816	0.0190926	0.0194514	0.0142337	0.0163565	0.0137474	0.0129993	0.0158744	0.0196274	0.0146809	0.0102308	0.0122572	0.0145571	0.0124129	0.0101659	0.0109835	0.0124042	0.0116867	0.0124276	0.0117725	0.00721551	0.00858336	0.00999986	0.00751539	0.00893994	0.00460597	0.0030475	0.00517615	0.00784083	0.00281786	0.00547549	0.00795228	0.00609803	-0.000905313	0.000776373	0.00479404	0.00169509	0.00562637	0.00189887	0.00551157
DADLE sem		0.00254772	0.00240282	0.00225281	0.00222273	0.00222072	0.00211252	0.00213363	0.00214489	0.00214483	0.00208806	0.00208114	0.0021187	0.00203439	0.00197049	0.00198414	0.00193612	0.0020224	0.00188169	0.0018905	0.00193535	0.001824	0.00179679	0.00182108	0.00176734	0.00175377	0.00169184	0.00161687	0.00166669	0.0015765	0.00155775	0.00153171	0.00151699	0.00146359	0.00144075	0.00134861	0.00136563	0.00130323	0.00131073	0.00124702	0.00127072	0.00130343	0.00126013	0.00130053	0.00119362	0.00102555	0.00109968	0.00101572	0.000987897
DOR Chronic		-58	-57	-56	-55	-54	-53	-52	-51	-50	-49	-48	-47	-46	-45	-44	-43	-42	-41	-40	-39	-38	-37	-36	-35	-34	-33	-32	-31	-30	-29	-28	-27	-26	-25	-24	-23	-22	-21	-20	-19	-18	-17	-16	-15	-14	-13	-12	-11
Baseline		0.0123238	0.0106476	0.0123999	0.0068092	0.00921735	0.00643087	0.00706731	0.00586527	0.00272899	-0.00100852	0.0014555	0.00502318	0.00365133	0.00523883	0.00356092	0.00206162	-0.00538417	0.00247186	0.00384155	0.00494947	0.00260988	0.00223506	0.00347134	-0.00170814	0.000421249	-0.00255202	0.00142221	0.00213822	-0.000968998	0.0013007	0.00149826	-0.000126104	0.00579042	0.00350473	0.00115279	0.00224516	0.000109148	-0.0024807	-0.000985349	-2.12616e-05	-0.000864934	0.00194569	0.00245385	0.00146804	0.000495546	0.00459469	0.000287221	0.00443241
Baseline sem		0.0019754	0.0020192	0.0019986	0.00197502	0.00195918	0.0019088	0.0019204	0.00187407	0.00192108	0.00186943	0.00184449	0.00184911	0.0017845	0.00182452	0.00177784	0.00175125	0.00178672	0.00168925	0.00162382	0.00164692	0.00162946	0.00165404	0.00157801	0.00155603	0.00149563	0.0015045	0.00145904	0.00143907	0.00142039	0.00140666	0.00131155	0.00132536	0.00132714	0.00124726	0.00129196	0.00124648	0.00114909	0.00113895	0.00110949	0.00110476	0.0010157	0.00100367	0.000923206	0.000923775	0.000883416	0.000874587	0.000841017	0.000781678
DADLE		0.0637895	0.0420402	0.0307456	0.0184093	0.0151285	0.0136972	0.0122204	0.00702908	0.00499127	0.00428551	0.0076823	0.000711492	0.00599985	0.00364531	0.00323607	0.00318488	0.00304356	0.00371096	0.00250622	-0.000117652	0.00148084	2.6591e-05	8.31566e-05	0.00554899	0.000792606	-0.000255602	0.00253634	0.00161394	0.00103767	0.00138025	0.0019094	-0.000129943	0.00570393	0.00207934	-0.000308154	0.000309779	0.00174181	0.00133585	0.00199165	0.0016153	0.000381435	9.2958e-05	0.00225806	0.00262916	0.00294069	-0.00149247	-0.000256115	0.00190145
DADLE sem		0.00164874	0.00157244	0.0015164	0.00147115	0.00143508	0.00145675	0.00145142	0.00132862	0.00141368	0.00138124	0.00130507	0.00128797	0.0012631	0.0012501	0.00125012	0.00136862	0.00158929	0.0012184	0.00122382	0.00122854	0.00118368	0.00120827	0.00123069	0.00118743	0.00115633	0.00116567	0.00116521	0.00110587	0.00114179	0.0011229	0.00109968	0.00109138	0.00106975	0.0010369	0.000995646	0.00100117	0.000966742	0.000987977	0.00100585	0.000953047	0.000924906	0.0009226	0.00089919	0.000844361	0.000815931	0.000821096	0.000784654	0.000782025
[truncated: 72 more columns]

## Sheet: DOR
DADLE									Vehicle
Cell ID	baseline	fr6-fr11	fr12-fr16	fr17-fr21	fr22-fr26	fr27-fr31	fr32-fr36		Cell ID	baseline	fr6-fr11	fr12-fr16	fr17-fr21	fr22-fr26	fr27-fr31	fr32-fr36
2229	1	1.13924	1.13644	1.27253	1.24544	1.37319	1.33923		2848	1	1.08343	1.19149	1.25072	1.30156	1.36078	1.33891
2230	1	1.16418	1.549	1.70325	1.93338	1.82077	1.75978		2849	1	0.988555	0.849867	0.804615	0.838908	0.795245	0.844942
2231	1	0.939159	1.0301	1.08685	1.0327	1.14224	1.06165		2906	1	1.11363	1.10301	1.3176	1.1602	1.25917	1.28951
2232	1	1.02003	1.01772	1.0028	1.01796	1.10176	1.14112		2907	1	0.990972	0.969008	0.916861	0.942031	0.942376	0.882469
2233	1	1.08826	1.17178	1.15095	1.15293	1.17115	1.24603		3314	1	1.08999	1.10411	1.02774	0.920205	0.902555	0.848422
2246	1	0.920366	1.08227	1.19749	1.31231	1.19399	1.31649		3316	1	1.06627	1.10643	1.12547	1.11184	1.06889	1.03534
2247	1	1.09767	1.29722	1.303	1.55115	1.53243	1.58027		3317	1	1.03701	1.04273	1.13276	0.987523	0.973902	0.887733
2785	1	0.978942	1.02915	1.18395	1.14728	1.25377	1.40668
2786	1	1.04171	1.10682	1.18099	1.24291	1.11715	1.10077		bins	baseline	fr6-fr11	fr12-fr16	fr17-fr21	fr22-fr26	fr27-fr31	fr32-fr36
3315	1	0.984663	1.08231	1.42138	1.69421	1.52971	1.64306		Average	1	1.05284	1.05238	1.08225	1.03747	1.04327	1.01819
3318	1	1.23476	1.94258	2.23361	3.21534	3.14253	2.90882		SEM	9.5162e-17	0.0171445	0.039271	0.0631801	0.0562649	0.0706226	0.0743744
bins	baseline	fr6-fr11	fr12-fr16	fr17-fr21	fr22-fr26	fr27-fr31	fr32-fr36		Ttest	DADLE/Veh	0.95107	0.154594	0.0930449	0.0774704	0.0752978	0.0340676
Average	1	1.05536	1.22231	1.33971	1.50415	1.48897	1.50035
SEM	9.13954e-17	0.0284493	0.0818039	0.10068	0.182546	0.170392	0.149164
