# Supplementary material for: Endocytic trafficking determines cellular tolerance of presynaptic opioid signaling
Source: eLife. 2022 Nov 15;11:e81298. doi: 10.7554/eLife.81298 (PMC9708073; doi:10.7554/eLife.81298)
Supplement: Figure 5—source data 1. [file elife-81298-fig5-data1.xlsx]

## Sheet: Panels C D
Movies are 5min
	MOR										DOR
	2086-1	2086-2	2110-1	2943-1	2943-2						2108-1	2108-2	2085-1	2085-2	2089-1	2089-2	2945-1	2945-2
Nev	13	10	8	21	7					Nev	4	6	8	8	5	4	14	0			MOR	DOR
Nsyn	53	39	26	46	46		Av	SEM		Nsyn	46	49	46	55	34	55	44		Av	SEM																MORC	DORC	MOR	DOR
Freq	0.0490566	0.0512821	0.0615385	0.0913043	0.0304348		0.0567232	0.00999626		Freq	0.0173913	0.0244898	0.0347826	0.0290909	0.0294118	0.0145455	0.0636364	0	0.0266685	0.0065395																0	0	0.0490566	0.0173913
																																				0.00869565	0	0.0512821	0.0244898
																																				0.00384615	0.00625	0.0615385	0.0347826
	MORC										DORC																									0.00434783	0	0.0913043	0.0290909
	2109-1	2109-2	2088-1	2088-2	2942-1	2942-2					2107-1	2107-2	2087-1	2087-2	2090-1	2090-2	2944-1	2944-2																		0	0	0.0304348	0.0294118
Nev	0	2	1	1	0	0				Nev	0	0	1	0	0	0	0	0																		0	0		0.0145455
Nsyn		46	52	46			Av	SEM		Nsyn			32						Av	SEM																	0		0.0636364
Freq	0	0.00869565	0.00384615	0.00434783	0	0	0.00281494	0.00143489		Freq	0	0	0.00625	0	0	0	0	0	0.00078125	0.00078125																	0		0
							Unpaired ttest
							MOR + DAMGO to DOR + DADLE	0.0230768
							MOR control to MOR + DAMGO	0.00023364
							DOR control to DOR + DADLE	0.00150803
Fluorescence for DOR events				This is integrated fluorescence, area is 19 pixels. Plotted is Average fluorescence.
frame	-18	-17	-16	-15	-14	-13	-12	-11	-10	-9	-8	-7	-6	-5	-4	-3	-2	-1	0	1	2	3	4	5	6	7	8	9	10	11	12	13	14	15	16	17	18	19	20	21	22	23	24	25	26	27	28	29	30
2085-1	235.1	20.1	-1837.9	-1678.9	-452.9	-897.9	-1597.9	687.1	-258.9	-1843.9	-410.9	1392.1	1814.1	229.1	-1008.9	1174.1	-115.9	-970.9	23142.1	27615.1	15457.1	14284.1	8422.1	7631.1	8291.1	8934.1	3989.1	7204.1	4726.1	6514.1	4739.1	5141.1	486.1	-278.9	-2568.9	-2833.9	-882.9	573.1	-2732.9	-5317.9	-4432.9	-5664.9	-3493.9	-3316.9	-5994.9	-4882.9	-5530.9	-5540.9	-6434.9
2085-1	5593.1	3272.1	1430.1	1771.1	1883.1	2467.1	-4021.9	-1619.9	1134.1	1847.1	3634.1	-1137.9	-541.9	-457.9	-925.9	-4586.9	895.1	140.1	24909.1	21902.1	17241.1	3813.1	9845.1	3495.1	6342.1	3900.1	6866.1	10544.1	7514.1	4227.1	-121.9	1266.1	-2053.9	135.1	651.1	-6048.9	405.1	-2185.9	-1821.9	-4931.9	-4832.9	-3880.9	-5387.9	-4238.9	-4274.9	-4249.9	-3674.9	-4402.9	-2904.9
2085-1	337.7	1189.7	323.7	2.7	683.7	2207.7	1263.7	449.7	-25.3	-138.3	109.7	-781.3	303.7	-219.3	14.7	-36.3	666.7	105.7	6518.7	13434.7	4645.7	4421.7	4253.7	4790.7	6579.7	4168.7	2816.7	3758.7	3035.7	2772.7	2153.7	3910.7	1359.7	2972.7	1387.7	3305.7	3082.7	1030.7	2586.7	3596.7	2276.7	4646.7	960.7	555.7	844.7	2111.7	2843.7	890.7	3021.7
2085-1	-201.6	2213.4	860.4	330.4	-59.6	-114.6	-148.6	1694.4	-1119.6	-986.6	633.4	-1130.6	689.4	2054.4	-380.6	-568.6	1751.4	-942.6	14467.4	37483.4	36336.4	38387.4	35688.4	33342.4	33836.4	33973.4	28525.4	27031.4	32077.4	28415.4	28007.4	26338.4	21004.4	24397.4	23316.4	22464.4	22409.4	20657.4	19767.4	16657.4	18637.4	19674.4	17442.4	21474.4	15394.4	17869.4	14850.4	10896.4	11534.4
2085-1	-1018.4	-693.4	-490.4	-110.4	-501.4	-744.4	-785.4	-1237.4	-696.4	-786.4	-672.4	1452.6	-445.4	-542.4	-153.4	339.6	280.6	1223.6	9589.6	14089.6	7409.6	5138.6	5317.6	5661.6	2945.6	3979.6	4013.6	1333.6	2302.6	2225.6	3078.6	4328.6	2552.6	2585.6	2060.6	4195.6	3061.6	3796.6	1415.6	2636.6	1812.6	1362.6	1553.6	1571.6	1329.6	1769.6	1534.6	1531.6	1007.6
2085-1	-2331.3	-1619.3	-2687.3	-3473.3	-2625.3	-1343.3	-1990.3	828.7	1785.7	2693.7	2389.7	70.7	-2168.3	-2435.3	-587.3	-52.3	-1254.3	-442.3	25370.7	17684.7	8641.7	4470.7	4555.7	5386.7	5445.7	8400.7	4976.7	2338.7	-1687.3	2389.7	2.7	-3882.3	-2752.3	-4916.3	-2912.3	-3518.3	-3128.3	-3861.3	-3476.3	-2893.3	-3910.3	-4621.3	-6240.3	-5267.3	-3157.3	-5534.3	-4271.3	-5002.3	-4042.3
2085-1	-1683.3	-1356.3	302.7	-25.3	5.7	1266.7	-515.3	-450.3	1135.7	-432.3	-69.3	-248.3	567.7	-931.3	190.7	331.7	-252.3	-292.3	9661.7	29067.7	17147.7	5733.7	5249.7	4138.7	5314.7	4527.7	3171.7	1030.7	1269.7	516.7	-1200.3	723.7	-1083.3	-338.3	-1152.3	-163.3	1446.7	264.7	372.7	-1481.3	-939.3	-1001.3	-148.3	323.7	-2126.3	-2752.3	-2836.3	-2421.3	-3289.3
2085-1	-76.6	1650.4	544.4	116.4	158.4	-252.6	683.4	322.4	-217.6	-179.6	-182.6	-83.6	85.4	-611.6	-408.6	1.4	595.4	1001.4	3222.4	5989.4	5203.4	3297.4	3564.4	1820.4	1917.4	3336.4	2443.4	1129.4	1357.4	1307.4	2036.4	2950.4	1501.4	1118.4	893.4	582.4	1596.4	281.4	1387.4	1186.4	1979.4	2300.4	1389.4	1589.4	1274.4	-171.6	1429.4	1387.4	872.4
2085-2	-1390.8	-2029.8	2533.2	-4276.8	-5588.8	-2460.8	-4806.8	-1757.8	-1436.8	-2437.8	-3163.8	1734.2	-3456.8	1601.2	-341.8	1518.2	-2060.8	8044.2	33518.2	17321.2	16209.2	15460.2	-1656.8	1993.2	-10524.8	-14918.8	-7852.8	-12699.8	-17920.8	-4852.8	-12404.8	-9743.8	-13937.8	-10374.8	-14968.8	-3298.8	-9071.8	-3482.8	-5740.8	-49.8	-8213.8	-1690.8	-7784.8	-15761.8	-13893.8	-13365.8	-11970.8	-8081.8	-13448.8
2085-2	1660	-1804	-513	-455	-497	172	402	-68	-922	-1041	-728	320	-669	2	1206	-444	1225	1051	11917	7338	7234	5992	923	2968	6620	4651	1563	1401	4293	1708	2442	4425	2363	1754	898	-776	324	1411	-1141	-839	-872	599	1038	1078	2127	-1036	-622	96	-992
2085-2	-1655.2	-1529.2	-3391.2	-1860.2	209.8	-282.2	285.8	-663.2	-1482.2	-2060.2	-778.2	476.8	-1287.2	3117.8	1313.8	779.8	1111.8	-1192.2	40818.8	41100.8	23221.8	27107.8	24984.8	18444.8	11473.8	12679.8	8552.8	3773.8	3601.8	1621.8	1554.8	-251.2	489.8	139.8	-1637.2	1780.8	2675.8	-2183.2	-953.2	-254.2	1063.8	1360.8	19.8	709.8	1276.8	-2830.2	479.8	4324.8	-1345.2
2085-2	-579.6	-1095.6	-1024.6	-832.6	-1120.6	-725.6	-350.6	121.4	31.4	454.4	-69.6	121.4	-222.6	-913.6	-496.6	-906.6	-610.6	2612.4	14307.4	8788.4	3657.4	1158.4	1865.4	3339.4	3466.4	646.4	505.4	584.4	375.4	-621.6	-662.6	-845.6	-468.6	-428.6	-1005.6	-1142.6	-1187.6	316.4	-747.6	-1196.6	-1409.6	-724.6	-797.6	-566.6	-914.6	-1204.6	-1655.6	-1478.6	-1849.6
2085-2	1487.9	-774.1	599.9	-1237.1	498.9	-475.1	1762.9	-602.1	1322.9	-908.1	192.9	-675.1	-497.1	-106.1	-1124.1	-681.1	-1184.1	3659.9	35304.9	28938.9	21570.9	14391.9	16821.9	14177.9	15404.9	13656.9	10411.9	13813.9	9348.9	6513.9	12417.9	8101.9	7659.9	8130.9	5001.9	5609.9	8292.9	5624.9	9761.9	6197.9	8220.9	7683.9	5873.9	5770.9	6068.9	3778.9	3296.9	5113.9	2139.9
2085-2	-2593.9	-2650.9	-1641.9	-2302.9	-2124.9	-1706.9	-113.9	-855.9	-753.9	349.1	-1579.9	-1047.9	-479.9	1054.1	499.1	336.1	681.1	942.1	7019.1	13710.1	9275.1	10334.1	7287.1	7165.1	548.1	85.1	3762.1	2867.1	2590.1	894.1	1628.1	1606.1	1316.1	2612.1	3382.1	3925.1	3543.1	5728.1	3815.1	4316.1	5078.1	2900.1	2398.1	3118.1	2230.1	1221.1	457.1	-286.9	254.1
2085-2	-132.5	-305.5	-698.5	-191.5	300.5	408.5	-61.5	-454.5	-87.5	108.5	-257.5	-242.5	-2.5	124.5	186.5	159.5	45.5	-34.5	6812.5	5127.5	4521.5	2021.5	1500.5	1734.5	1047.5	378.5	1371.5	279.5	-441.5	135.5	498.5	-92.5	-738.5	148.5	22.5	196.5	-381.5	453.5	203.5	104.5	270.5	-905.5	961.5	218.5	-178.5	78.5	-267.5	566.5	-128.5
2085-2	-680.2	559.8	999.8	-244.2	395.8	1015.8	121.8	60.8	106.8	-299.2	-30.2	210.8	-87.2	-283.2	236.8	237.8	-363.2	270.8	8550.8	6361.8	4888.8	5699.8	2535.8	2968.8	2081.8	960.8	842.8	1324.8	1741.8	2652.8	3718.8	2024.8	1704.8	1487.8	955.8	301.8	-101.2	23.8	407.8	2121.8	1157.8	1018.8	400.8	-41.2	417.8	-269.2	502.8	1265.8	304.8
2089-1	3889.8	553.8	933.8	222.8	5003.8	-40.2	171.8	5025.8	397.8	98.8	-2727.2	-1104.2	-134.2	-3440.2	-297.2	1643.8	6838.8	-1276.2	59407.8	41262.8	38780.8	34145.8	26482.8	12526.8	9186.8	5781.8	12407.8	12292.8	14226.8	12090.8	9201.8	12607.8	13023.8	8827.8	7390.8	-201.2	4028.8	2246.8	1205.8	5761.8	2419.8	2818.8	3223.8	2299.8	3088.8	5806.8	-546.2	910.8	2882.8
2089-1	2278	509	-3140	-2122	-5956	-3799	-6109	-2397	4152	1053	-992	1929	-1542	-843	-753	-5622	2216	402	46480	90329	76220	66182	44148	43247	22449	29275	27401	20284	16386	21064	6957	17368	8135	4978	-3231	-4084	-3657	7685	-391	-4184	-4483	-2933	2666	-3220	-8090	-6073	-2698	4624	-1540
2089-1	201.4	2487.4	168.4	171.4	-258.6	286.4	119.4	324.4	64.4	506.4	3279.4	1065.4	354.4	-263.6	225.4	-401.6	-1787.6	-3042.6	21235.4	17093.4	10367.4	10019.4	8654.4	7530.4	5106.4	7021.4	7579.4	5404.4	1883.4	-1666.6	34.4	-3927.6	-183.6	200.4	-1717.6	882.4	-2626.6	-1580.6	-5742.6	-2842.6	-2915.6	-1596.6	-3031.6	-1324.6	-2638.6	-1713.6	-524.6	-3500.6	-3414.6
2089-1	309.6	-619.4	-85.4	1265.6	1105.6	700.6	564.6	405.6	-67.4	-339.4	466.6	623.6	-599.4	-12.4	159.6	-174.4	410.6	-467.4	9625.6	9155.6	5845.6	2576.6	2130.6	3020.6	2109.6	4341.6	3131.6	4882.6	3981.6	1963.6	1966.6	958.6	-0.4	2438.6	392.6	1671.6	-28.4	-1519.4	465.6	-372.4	1358.6	259.6	-1622.4	472.6	-1634.4	68.6	-572.4	-103.4	1004.6
2089-1	-218	-246	-572	-71	-377	553	-39	-158	-284	451	100	607	-29	75	-384	-509	-660	633	9143	6683	3882	4914	3413	4518	1702	908	2234	3449	1482	982	1684	1382	1096	-164	1763	1699	1014	1386	-23	1188	749	842	1160	1569	113	300	401	533	517
2089-2	14289.9	6533.9	2667.9	4768.9	8031.9	10492.9	2026.9	2804.9	2727.9	9400.9	4601.9	-8420.1	-692.1	1038.9	-4169.1	-6340.1	-2421.1	4272.9	95044.9	29384.9	15921.9	36385.9	16550.9	-1361.1	725.9	-5178.1	-4318.1	-3189.1	-6196.1	-7942.1	-6210.1	1776.9	-5454.1	-889.1	-3580.1	-3685.1	436.9	-6240.1	-2848.1	-4073.1	-7094.1	-10598.1	-8225.1	-14073.1	-11886.1	-14560.1	-17926.1	-16395.1	-12784.1
2089-2	11885.3	10801.3	15357.3	447.3	8495.3	-287.7	2468.3	5088.3	-2330.7	1699.3	-7018.7	5649.3	-2165.7	-7779.7	-9586.7	584.3	9555.3	11393.3	69880.3	72488.3	53610.3	58914.3	55108.3	48920.3	49428.3	48078.3	37795.3	34187.3	39491.3	27178.3	17797.3	20679.3	19382.3	21659.3	11652.3	10962.3	13811.3	4977.3	9437.3	9162.3	14568.3	7719.3	15964.3	12683.3	9592.3	11612.3	5959.3	10728.3	2819.3
2089-2	-4204.3	-7960.3	244.7	-125.3	-553.3	-2578.3	-647.3	14179.7	5064.7	3438.7	4382.7	3910.7	-4978.3	-5982.3	-1690.3	-4586.3	-3353.3	3793.7	53623.7	51763.7	48521.7	38611.7	28619.7	24276.7	17144.7	5680.7	7116.7	8358.7	9147.7	10605.7	6986.7	6629.7	18876.7	15089.7	10146.7	13731.7	14300.7	12327.7	12913.7	14412.7	14984.7	14965.7	11267.7	11032.7	5659.7	10405.7	14900.7	8141.7	7284.7
2089-2	497.8	-1265.2	-816.2	-2010.2	-921.2	-814.2	-241.2	-696.2	129.8	-590.2	-210.2	-1061.2	-268.2	1552.8	921.8	-605.2	485.8	-355.2	30981.8	30391.8	14666.8	10241.8	8703.8	9571.8	3608.8	4389.8	4042.8	3999.8	3847.8	2114.8	5025.8	737.8	4935.8	7552.8	1438.8	872.8	1034.8	89.8	495.8	-160.2	-437.2	-331.2	-53.2	-836.2	1244.8	-1260.2	-631.2	-1056.2	-2382.2
2108-1	-1106.8	-2250.8	-6024.8	703.2	-1540.8	765.2	-441.8	-3383.8	-1351.8	7973.2	135.2	-1279.8	-6274.8	-2751.8	-1481.8	4719.2	3699.2	-3386.8	38806.2	36938.2	27830.2	26962.2	21103.2	13241.2	11446.2	13072.2	3134.2	5285.2	13293.2	9635.2	4385.2	6325.2	2730.2	4883.2	5310.2	6283.2	4836.2	-2267.8	2086.2	-520.8	-4258.8	2958.2	2460.2	794.2	3453.2	1601.2	3307.2	-664.8	-214.8
2108-1	13715.8	15853.8	19170.8	11297.8	7723.8	11393.8	5551.8	11032.8	7226.8	617.8	-3814.2	1984.8	-3578.2	-9086.2	-1755.2	66.8	3133.8	5203.8	46329.8	26431.8	30237.8	20714.8	20902.8	25013.8	27455.8	23222.8	22668.8	16771.8	18322.8	12385.8	11153.8	12587.8	14522.8	4498.8	10205.8	13807.8	7839.8	5391.8	5533.8	-4415.2	-8007.2	-1226.2	1228.8	808.8	-9273.2	-8728.2	-3471.2	-8699.2	-17013.2
2108-1	-213.6	-36.6	1647.4	-1117.6	-809.6	-516.6	-617.6	-1366.6	727.4	827.4	-118.6	139.4	109.4	-1050.6	-119.6	-651.6	-611.6	748.4	11581.4	12995.4	9159.4	5389.4	2299.4	2508.4	1044.4	3310.4	3054.4	5253.4	2599.4	2521.4	-385.6	1944.4	313.4	83.4	906.4	-974.6	-637.6	342.4	-68.6	-574.6	687.4	-1021.6	-1378.6	-1332.6	-1301.6	-1754.6	-1689.6	-2080.6	-1337.6
2108-1	58.6	-345.4	161.6	457.6	-393.4	-129.4	371.6	-106.4	-658.4	293.6	-587.4	-686.4	-448.4	-73.4	-43.4	141.6	-524.4	2586.6	8597.6	5318.6	3964.6	3939.6	2876.6	1475.6	-254.4	-173.4	-87.4	383.6	-96.4	-280.4	-1085.4	62.6	399.6	2.6	-327.4	-631.4	-637.4	-431.4	-371.4	-367.4	-132.4	17.6	1181.6	719.6	-229.4	-352.4	-167.4	285.6	44.6
2108-2	-130.3	59.7	1418.7	-1690.3	-610.3	-2832.3	-393.3	-975.3	731.7	-317.3	-168.3	-1171.3	584.7	590.7	-627.3	706.7	-534.3	204.7	12023.7	8245.7	11140.7	5725.7	5026.7	-498.3	4029.7	8089.7	5138.7	4487.7	2511.7	312.7	2269.7	2656.7	185.7	1462.7	7087.7	1160.7	1563.7	324.7	994.7	3825.7	574.7	3535.7	202.7	773.7	1516.7	3441.7	-1044.3	-1079.3	-2352.3
2108-2	227.9	13.9	-309.1	-95.1	965.9	62.9	-275.1	-262.1	64.9	-812.1	-904.1	-945.1	4.9	-667.1	-9.1	992.9	2561.9	-287.1	10010.9	8964.9	10030.9	8893.9	4438.9	4649.9	3049.9	2246.9	3546.9	3260.9	3812.9	2799.9	2995.9	4306.9	3086.9	3786.9	4869.9	-328.1	-781.1	-17.1	1.9	-1006.1	-538.1	-1174.1	-1072.1	-827.1	-911.1	-25.1	1167.9	-367.1	64.9
2108-2	1700.9	2392.9	1338.9	1851.9	1872.9	1309.9	1164.9	19.9	-191.1	695.9	-199.1	-217.1	-402.1	-318.1	-307.1	395.9	-277.1	819.9	8805.9	4105.9	205.9	3226.9	5165.9	1196.9	-577.1	-685.1	113.9	3413.9	1340.9	5774.9	768.9	-811.1	-451.1	755.9	624.9	807.9	1291.9	-758.1	626.9	1118.9	200.9	-536.1	-1656.1	-1349.1	-1184.1	-603.1	-1254.1	1292.9	4746.9
2108-2	91.5	-80.5	-297.5	84.5	472.5	318.5	163.5	236.5	296.5	839.5	-480.5	-247.5	-266.5	-3.5	160.5	80.5	-204.5	-174.5	19431.5	8667.5	234.5	683.5	-340.5	-370.5	-31.5	-218.5	629.5	538.5	-969.5	-121.5	-198.5	579.5	-64.5	229.5	57.5	-134.5	-359.5	-146.5	-421.5	-437.5	233.5	284.5	-389.5	-65.5	-428.5	-634.5	-291.5	255.5	457.5
2108-2	-190.1	420.9	-576.1	145.9	25.9	-223.1	-551.1	144.9	92.9	-414.1	-425.1	-472.1	-559.1	-435.1	136.9	379.9	1033.9	661.9	24570.9	12486.9	1170.9	2119.9	1529.9	574.9	607.9	301.9	-475.1	-31.1	1122.9	229.9	227.9	2.9	567.9	218.9	235.9	525.9	34.9	29.9	990.9	-60.1	975.9	-358.1	-183.1	-14.1	-604.1	8.9	302.9	19.9	-416.1
2108-2	4118.3	299.3	3.3	-572.7	463.3	26.3	495.3	-370.7	498.3	-478.7	-490.7	112.3	-829.7	1151.3	-405.7	748.3	-180.7	-124.7	1418.3	1664.3	3057.3	645.3	3764.3	1431.3	2584.3	158.3	765.3	-1139.7	-458.7	122.3	252.3	1093.3	550.3	2419.3	1814.3	1312.3	1782.3	830.3	123.3	2413.3	-108.7	755.3	-300.7	-683.7	-956.7	-682.7	-284.7	-1381.7	-1422.7
2945-1	3077.6	401.6	1311.6	-1981.4	2328.6	1445.6	436.6	186.6	1415.6	3131.6	1153.6	-16.4	1392.6	-487.4	1087.6	978.6	-1741.4	-6914.4	31747.6	27362.6	29712.6	22329.6	18955.6	16305.6	14572.6	11935.6	10382.6	4343.6	3186.6	5749.6	1939.6	1017.6	1067.6	479.6	113.6	569.6	-2798.4	-6526.4	-5673.4	-3801.4	1403.6	-5496.4	-5880.4	-4530.4	-8184.4	-8050.4	-10133.4	-5594.4	-8161.4
2945-1	-4920.4	782.6	-3199.4	2095.6	-1719.4	1023.6	1363.6	-1566.4	151.6	-3584.4	-3927.4	477.6	-4651.4	-1918.4	2309.6	-2875.4	2884.6	11133.6	31826.6	25400.6	28187.6	22944.6	21362.6	15169.6	23191.6	17210.6	15394.6	20511.6	19509.6	17580.6	14714.6	14887.6	9113.6	11299.6	2145.6	8496.6	4192.6	4262.6	4346.6	9241.6	10030.6	8103.6	2177.6	1736.6	3715.6	5577.6	1316.6	3036.6	-3554.4
2945-1	-649.7	-1687.7	-2280.7	-819.7	-3129.7	-1543.7	-4579.7	-178.7	-2927.7	-2202.7	-3117.7	-1322.7	637.3	1968.3	82.3	3668.3	2266.3	948.3	35453.3	16392.3	7432.3	9703.3	5755.3	5972.3	4985.3	4792.3	3404.3	1775.3	2100.3	1713.3	-632.7	-1244.7	-994.7	-947.7	1197.3	2708.3	-3599.7	-1198.7	1130.3	773.3	-942.7	-1834.7	-2685.7	-3378.7	-2200.7	-3537.7	-1915.7	-1018.7	-3836.7
2945-1	222.2	-292.8	61.2	619.2	-57.8	-291.8	450.2	283.2	-37.8	-592.8	-136.8	357.2	870.2	89.2	-293.8	-623.8	312.2	56.2	8985.2	16527.2	13428.2	13926.2	13267.2	12240.2	12106.2	11295.2	9805.2	9376.2	10835.2	11369.2	10284.2	9528.2	11725.2	9869.2	8959.2	5418.2	9028.2	9448.2	9744.2	7205.2	7673.2	9463.2	7458.2	6749.2	7593.2	6768.2	8107.2	6910.2	5954.2
2945-1	-2759.3	-2488.3	-2256.3	-2023.3	-864.3	-1601.3	79.7	-889.3	-1531.3	425.7	-672.3	539.7	-814.3	2183.7	6.7	454.7	-1216.3	623.7	19700.7	39034.7	26477.7	21798.7	14520.7	13395.7	10797.7	8989.7	7238.7	4872.7	4876.7	1726.7	-196.3	1078.7	215.7	1526.7	1413.7	382.7	-2129.3	-277.3	-236.3	1948.7	-731.3	-1133.3	-2313.3	1173.7	310.7	-2712.3	-999.3	-323.3	-923.3
2945-1	-1997.3	-891.3	-1595.3	-2166.3	-1162.3	-1657.3	-1855.3	-1500.3	542.7	-25.3	-1707.3	-796.3	-651.3	-24.3	623.7	943.7	1479.7	-385.3	13447.7	8459.7	5178.7	2686.7	1577.7	1309.7	2508.7	2079.7	1188.7	2122.7	1623.7	2153.7	1049.7	-205.3	-1545.3	-2106.3	368.7	-1207.3	-869.3	-1581.3	-1546.3	377.7	-798.3	-937.3	-1121.3	-575.3	1960.7	-689.3	-35.3	-2482.3	-1038.3
2945-1	-66.9	1203.1	988.1	157.1	1111.1	810.1	495.1	1665.1	419.1	-726.9	-4.9	-245.9	134.1	86.1	370.1	-471.9	-516.9	957.1	7826.1	7536.1	4524.1	3251.1	2826.1	3689.1	3878.1	2309.1	1579.1	866.1	1508.1	328.1	-883.9	2375.1	1045.1	2179.1	-140.9	2412.1	-1555.9	243.1	-1373.9	-848.9	-814.9	-1930.9	-2127.9	-1547.9	-1429.9	424.1	-128.9	-483.9	-1665.9
2945-1	-2502.8	-1762.8	-1106.8	-2326.8	-3487.8	-740.8	-1262.8	613.2	-51.8	-443.8	-715.8	812.2	657.2	497.2	-293.8	-1191.8	428.2	302.2	18801.2	16895.2	15736.2	14293.2	13336.2	11163.2	12749.2	11947.2	13422.2	10482.2	11378.2	8834.2	11121.2	10639.2	8420.2	10757.2	12332.2	8683.2	7012.2	11471.2	10003.2	7130.2	8449.2	9178.2	8443.2	8605.2	9141.2	8923.2	6917.2	6588.2	6602.2
2945-1	-1618	-1687	-880	-113	-172	-670	-324	-741	759	346	1556	14	3136	69	-1794	-1681	-1392	-1013	13668	12050	5971	3888	2584	3257	3225	218	-1260	-618	-1290	-512	-1655	-1438	-2026	-2332	-2384	-2335	-249	-2044	-1648	-2102	-772	635	-5	-748	-71	-2694	-2043	-2726	-1679
2945-1	-3690	-3290	-2865	-2449	-2280	-3118	-1520	-858	2100	454	-57	-1084	-156	136	742	-44	-1320	-771	7927	58106	64610	54411	55182	62440	59331	52992	52327	35522	32541	44631	40372	36484	37566	41627	35328	30253	34000	44850	49016	50226	45259	51908	57356	59482	51035	48204	48650	53422	45857
2945-1	-2190.9	-1592.9	-68.9	-1253.9	-1318.9	-1343.9	-292.9	-850.9	-231.9	-1236.9	38.1	489.1	-690.9	-356.9	97.1	1169.1	662.1	61.1	18503.1	16269.1	15140.1	12487.1	9608.1	11997.1	12012.1	11051.1	9178.1	11539.1	12401.1	10390.1	10000.1	9186.1	8847.1	10039.1	8911.1	10560.1	11415.1	10334.1	7342.1	9397.1	8425.1	10513.1	7997.1	9328.1	6743.1	9705.1	7416.1	9266.1	8545.1
2945-1	-505.1	-1530.1	-1111.1	-834.1	-470.1	-1248.1	872.9	-293.1	388.9	661.9	-38.1	-184.1	803.9	393.9	136.9	-151.1	-736.1	-1276.1	17379.9	14374.9	10131.9	12062.9	10854.9	9608.9	11225.9	7249.9	9273.9	3022.9	2499.9	1224.9	2009.9	3257.9	3036.9	786.9	2342.9	2361.9	1815.9	2290.9	3251.9	2398.9	5156.9	3987.9	4132.9	6098.9	6517.9	4689.9	5195.9	4506.9	4689.9
2945-1	-1115.8	-1171.8	-1162.8	-60.8	-95.8	-629.8	-987.8	-147.8	-832.8	0.2	-96.8	-15.8	25.2	468.2	43.2	614.2	-509.8	304.2	5671.2	7332.2	4769.2	1334.2	1291.2	3093.2	2110.2	643.2	1066.2	652.2	2284.2	1241.2	812.2	1767.2	880.2	426.2	-417.8	-202.8	-6.8	993.2	390.2	766.2	854.2	400.2	402.2	-318.8	473.2	-187.8	-623.8	-381.8	178.2
2945-1	1630.8	862.8	1493.8	552.8	1152.8	1120.8	1659.8	787.8	2808.8	480.8	1335.8	-663.2	-276.2	-1256.2	-398.2	-169.2	-947.2	-915.2	1778.8	7916.8	5496.8	2969.8	3859.8	1927.8	2131.8	1767.8	2221.8	1826.8	1688.8	2282.8	1434.8	950.8	1129.8	1599.8	1581.8	1053.8	2024.8	1190.8	1.8	912.8	1354.8	1402.8	1487.8	1690.8	2420.8	3015.8	2913.8	1678.8	1419.8
frame	-18	-17	-16	-15	-14	-13	-12	-11	-10	-9	-8	-7	-6	-5	-4	-3	-2	-1	0	1	2	3	4	5	6	7	8	9	10	11	12	13	14	15	16	17	18	19	20	21	22	23	24	25	26	27	28	29	30
IntegIntens	552.786	184.173	284.276	-233.847	76.3367	97.5204	-235.806	459.439	383.276	325.929	-255.99	-16.1327	-565.214	-505.459	-389.5	-208.316	417.255	814.153	22139.7	21305.8	16414.4	14287.6	11565.7	10042.9	8906.79	7825.83	7082.89	6120.5	5817.5	5406.21	4124.21	4515.23	3664.03	3926.21	2879.93	2804.36	2726.79	2542.36	2507.4	2496.89	2228.81	2483.64	2141.83	2008.38	1305.7	1159.72	1104.91	1280.01	286.357
SEM	550.777	493.126	561.067	323.851	390.671	372.907	266.557	421.381	250.023	310.47	284.732	254.787	237.37	315.969	236.316	274.823	312.777	442.39	2711.1	2594.74	2376.63	2245.08	1912.66	1862.33	1767.14	1716.16	1517.39	1273.04	1391.32	1306.45	1175	1133.17	1152.76	1165.23	1040.17	940.624	998.047	1123.27	1188.16	1195.66	1190.76	1271.49	1355.5	1451.05	1280.56	1282.67	1254.92	1291.01	1196.07
Av (/19)	29.094	9.69334	14.9619	-12.3077	4.01772	5.13265	-12.4108	24.181	20.1724	17.1541	-13.4731	-0.849087	-29.7481	-26.6031	-20.5	-10.964	21.9608	42.8502	1165.25	1121.36	863.917	751.978	608.72	528.573	468.778	411.886	372.784	322.132	306.184	284.538	217.064	237.644	192.844	206.643	151.575	147.598	143.515	133.808	131.968	131.415	117.306	130.718	112.728	105.704	68.7213	61.0381	58.1531	67.369	15.0714
	28.9883	25.954	29.5298	17.0448	20.5616	19.6267	14.0293	22.178	13.1591	16.3405	14.9859	13.4098	12.4932	16.63	12.4377	14.4644	16.4619	23.2837	142.689	136.565	125.086	118.162	100.666	98.0175	93.0075	90.3243	79.8629	67.0019	73.2273	68.7605	61.842	59.6405	60.6714	61.3278	54.7456	49.5065	52.5288	59.1192	62.5348	62.9292	62.6714	66.9203	71.3419	76.3708	67.3981	67.509	66.0484	67.9478	62.9511
Fluorescence for MOR events
2086-1	3253.7	1662.7	6104.7	7069.7	5480.7	8474.7	3217.7	668.7	5597.7	1148.7	-1310.3	637.7	1742.7	-445.3	-329.3	-1700.3	-4389.3	-952.3	32721.7	49340.7	24958.7	16242.7	9603.7	7310.7	6542.7	5107.7	-1434.3	1787.7	-24.3	-2327.3	-1498.3	-4638.3	-3305.3	-5664.3	-3759.3	-2770.3	-4605.3	-8729.3	-6689.3	-4733.3	-5749.3	-2702.3	-2031.3	-3587.3	-4853.3	-3344.3	-6674.3	-5294.3	-7141.3
2086-1	536	758	874	-584	197	-29	-261	-1150	-949	-374	698	-566	839	-331	359	434	-309	199	19645	33995	23142	21049	14481	11224	9933	7607	3452	773	2335	860	3033	289	-330	509	921	-961	-1064	-1399	-1577	-1421	655	-1772	-1877	-1077	930	-822	-2342	-1461	-2468
2086-1	-1475.7	615.3	3581.3	1292.3	-80.7	-4361.7	6020.3	581.3	2051.3	-3418.7	-363.7	-4285.7	2359.3	1021.3	1230.3	-2762.7	6105.3	-1936.7	163427	124386	96784.5	77765.5	73056.5	47954.5	46630.5	39341.5	42110.5	33942.5	39100.5	26605.5	20239.5	29652.5	19600.5	14591.5	18642.5	14713.5	15123.5	8937.5	10449.5	9579.5	9446.5	6128.5	2945.5	6204.5	7851.5	3633.5	1218.5	-2163.5	-3164.5
2086-1	173.4	952.4	2063.4	3392.4	1646.4	-234.6	1100.4	2700.4	-1542.6	520.4	588.4	2225.4	-393.6	-1823.6	-870.6	-871.6	2458.4	-290.6	16956.4	8203.4	8853.4	5057.4	5480.4	6049.4	5804.4	2014.4	2249.4	2334.4	1070.4	-1070.6	1945.4	-406.6	1740.4	371.4	422.4	-1548.6	628.4	238.4	-1851.6	-1759.6	-2875.6	34.4	-793.6	1417.4	-2237.6	-2628.6	-2155.6	-309.6	-1870.6
2086-1	2451	4111	2097	1854	3392	971	1698	1372	619	2025	-546	870	-2429	-2353	174	524	789	327	21021	25562	26521	25228	23668	19404	22888	17252	24828	24099	16081	22768	24280	25304	21631	19856	20059	14857	13707	12889	11624	10237	11304	15497	14139	12532	14103	10316	8078	10184	7030
2086-1	2164	2129	-1133	-2044	-1375	205	-2297	-1522	-31	-169	-1483	-1168	-586	1951	-909	848	1553	-6	8328	16509	13820	20482	9294	7329	6318	6615	10125	5421	5423	5931	2820	5969	-1316	5056	1669	1518	-922	358	1250	1198	1242	-1839	-936	-2653	-1642	-1454	-836	1661	-1306
2086-1	901.5	3605.5	1783.5	3421.5	1332.5	649.5	871.5	-1921.5	-816.5	593.5	1941.5	451.5	66.5	-927.5	764.5	234.5	-2656.5	348.5	13759.5	12848.5	9227.5	8474.5	9526.5	11892.5	4754.5	6288.5	10412.5	6201.5	4540.5	2374.5	4037.5	22.5	3718.5	1447.5	-504.5	1849.5	2046.5	-3198.5	136.5	2025.5	-1612.5	-356.5	-425.5	-2224.5	-2787.5	-2637.5	1211.5	-1841.5	-1123.5
2086-1	29.9	1477.9	1597.9	1587.9	602.9	930.9	884.9	271.9	-428.1	-1010.1	393.9	1058.9	-226.1	-127.1	343.9	404.9	-86.1	-324.1	11629.9	4803.9	1838.9	4413.9	2176.9	2522.9	1527.9	-685.1	871.9	-1663.1	-657.1	-128.1	1259.9	2064.9	436.9	-720.1	-1162.1	-1338.1	688.9	-575.1	-792.1	-1416.1	-3048.1	-1125.1	-1371.1	-2434.1	-1121.1	-3039.1	-510.1	-937.1	-1585.1
2086-1	15.6	-1106.4	-747.4	-430.4	-1191.4	2597.6	-1249.4	-934.4	-677.4	142.6	686.6	-1702.4	268.6	81.6	454.6	1595.6	-119.4	-730.4	19077.6	16180.6	16891.6	5442.6	6514.6	8294.6	2461.6	2759.6	3036.6	1799.6	943.6	8.6	1908.6	3219.6	1580.6	1348.6	3349.6	-563.4	1118.6	-399.4	3.6	3961.6	298.6	-536.4	-447.4	-2172.4	-107.4	-435.4	-1719.4	-219.4	-979.4
2086-1	3.7	320.7	401.7	565.7	-847.3	-1084.3	-365.3	-598.3	-395.3	-28.3	-1013.3	-117.3	551.7	-159.3	265.7	-820.3	614.7	1101.7	13872.7	13012.7	7505.7	5878.7	9190.7	5189.7	7204.7	2356.7	2841.7	5613.7	2628.7	4009.7	2194.7	2364.7	1027.7	-20.3	2630.7	1748.7	2978.7	2798.7	2675.7	1688.7	1719.7	3867.7	2617.7	1760.7	1295.7	1880.7	1047.7	381.7	388.7
2086-1	75	480	666	-714	-214	-271	510	658	-114	305	-242	946	-28	-1100	-835	735	872	-539	29861	92939	82479	76538	76779	58386	53530	58423	58268	48252	42502	37068	29594	31978	27324	28522	24479	23649	24054	23535	17007	21462	14537	12246	14031	16257	12920	7187	13652	11553	8535
2086-1	476.8	-226.2	-142.2	-393.2	225.8	-68.2	-823.2	924.8	40.8	-72.2	93.8	238.8	-227.2	220.8	383.8	-54.2	405.8	-1030.2	24648.8	10890.8	12958.8	3294.8	6714.8	582.8	5419.8	2112.8	1615.8	1056.8	4836.8	3987.8	2941.8	3224.8	1782.8	-704.2	1418.8	236.8	988.8	2092.8	115.8	249.8	27.8	-652.2	-1169.2	-559.2	-997.2	836.8	1466.8	1587.8	947.8
2086-1	-505.4	16.6	-635.4	-543.4	-683.4	1396.6	-51.4	-351.4	-235.4	-1220.4	-548.4	69.6	424.6	60.6	-77.4	648.6	895.6	-17.4	7659.6	4869.6	2148.6	1072.6	1178.6	808.6	821.6	1359.6	2154.6	465.6	432.6	-383.4	263.6	158.6	-1062.4	-107.4	-527.4	-1536.4	-407.4	-927.4	-1839.4	-1828.4	-1792.4	-1382.4	-2803.4	-2026.4	-1913.4	-3052.4	-3351.4	-1498.4	-2733.4
2086-2	7803	452	5001	4599	458	4520	902	-1769	1102	1661	820	18	1024	561	-1850	-637	694	-3393	64469	27379	23069	8606	14101	24551	7738	12971	1867	-3447	-195	-6027	-6741	-5194	2424	-8486	-6281	-678	-4219	-7715	-5880	-7124	-5900	-5474	-3473	-6278	-10734	-4072	-6448	-6634	-5853
2086-2	-2576	-4566	-5618	-4151	-3609	-4004	-5122	-1427	1467	4068	2998	-1358	4917	2570	-2938	-234	-5019	-6471	11577	1903	-1751	-6011	-4941	254	-9863	-8038	-6727	-7128	-9104	-8505	1762	-6395	-8690	-6048	-6881	-9560	-10709	-10324	-9933	-10527	-12717	-12264	-11753	-11077	-11069	-11962	-12368	-12299	-12846
2086-2	-518.6	99.4	1828.4	455.4	1092.4	1220.4	1551.4	733.4	1853.4	1099.4	690.4	-233.6	0.4	-1674.6	-117.6	-1008.6	-1444.6	835.4	17375.4	13153.4	6949.4	6753.4	5374.4	4564.4	7670.4	7043.4	3892.4	4450.4	3119.4	902.4	3285.4	1651.4	2563.4	-166.6	-481.6	2038.4	-660.6	-501.6	-1233.6	-825.6	-1280.6	-684.6	795.4	-233.6	1445.4	184.4	2903.4	1367.4	923.4
2086-2	3706.1	3311.1	1744.1	-550.9	1232.1	-758.9	-620.9	-1800.9	-1946.9	-148.9	-369.9	202.1	-812.9	28.1	1974.1	-1650.9	1585.1	1140.1	81436.1	39996.1	24614.1	27416.1	26435.1	18531.1	16163.1	6292.1	6533.1	13552.1	4465.1	781.1	3986.1	1497.1	387.1	-4106.9	9.1	-4850.9	-5841.9	-4637.9	-3320.9	-3980.9	-4537.9	-5574.9	-5642.9	-2611.9	92.1	-2722.9	-3893.9	-2311.9	-4054.9
2086-2	282.1	422.1	-341.9	516.1	-274.9	72.1	2036.1	-160.9	871.1	480.1	-997.9	-135.9	164.1	-37.9	-591.9	-482.9	497.1	234.1	15218.1	9180.1	8239.1	7107.1	4819.1	6003.1	5171.1	1480.1	7160.1	1766.1	3966.1	-487.9	-69.9	5847.1	574.1	-607.9	4057.1	-482.9	388.1	-944.9	984.1	746.1	1592.1	115.1	-237.9	-2090.9	560.1	-2261.9	-1551.9	-1974.9	-2185.9
2086-2	-2674	-1717	-2301	-2526	-1286	-2433	-1705	-1502	-2872	-1687	-1178	-620	-1682	-1103	1880	1815	3796	1651	18492	10709	10829	9225	8341	2697	893	3582	4407	3633	1095	2072	203	1512	-1153	489	1919	-323	2019	1241	2362	8	3257	653	750	999	-1905	1834	1733	1384	-29
2086-2	-788.2	-111.2	304.8	-345.2	-159.2	8.8	194.8	314.8	1072.8	613.8	-382.2	-13.2	541.8	197.8	84.8	-703.2	-635.2	-777.2	21186.8	22298.8	13059.8	11331.8	9295.8	10406.8	9510.8	12109.8	8974.8	5396.8	6705.8	5671.8	5842.8	5042.8	3106.8	2323.8	28.8	718.8	499.8	771.8	1661.8	1529.8	3024.8	2754.8	1736.8	2112.8	1018.8	2164.8	1587.8	-235.2	-329.2
2086-2	345.5	-443.5	-1131.5	487.5	364.5	-282.5	-479.5	-169.5	-204.5	-684.5	-853.5	-117.5	-921.5	11.5	-24.5	1327.5	1816.5	-349.5	12757.5	23603.5	12871.5	11295.5	9282.5	9228.5	5794.5	3634.5	7371.5	4139.5	5603.5	1650.5	1027.5	2686.5	1920.5	1427.5	2950.5	826.5	460.5	912.5	-346.5	2116.5	3354.5	1261.5	-353.5	2543.5	541.5	2693.5	1445.5	85.5	349.5
2086-2	2226.6	-94.4	-462.4	1459.6	795.6	-506.4	1363.6	-617.4	-10.4	-721.4	-644.4	-1385.4	-1292.4	2017.6	-480.4	134.6	1502.6	879.6	9720.6	12142.6	8992.6	4552.6	5274.6	3536.6	2017.6	5637.6	2790.6	-878.4	3052.6	1506.6	-208.4	-1553.4	774.6	-489.4	-1300.4	-758.4	2233.6	-167.4	2081.6	-705.4	431.6	-2266.4	-849.4	-1354.4	1183.6	-2479.4	-1660.4	-1361.4	-1855.4
2086-2	6067.9	4445.9	4917.9	3050.9	4040.9	4042.9	3215.9	2632.9	2374.9	1919.9	33.9	-291.1	-557.1	566.9	-561.1	-1092.1	-2196.1	-198.1	12051.9	7012.9	2894.9	-1294.1	-170.1	815.9	-19.1	75.9	778.9	1028.9	1267.9	1293.9	1084.9	-2830.1	-74.1	1482.9	-1705.1	-932.1	616.9	-2616.1	-781.1	-1856.1	-1373.1	-1236.1	-2761.1	-739.1	-1483.1	909.9	387.9	-3024.1	-1610.1
2110-1	9619.4	8672.4	6975.4	11425.4	6931.4	7692.4	5676.4	4993.4	1309.4	3592.4	2969.4	1490.4	-898.6	-1108.6	-1536.6	-698.6	-2354.6	-2764.6	34247.4	23347.4	18857.4	19016.4	16948.4	13439.4	5979.4	5101.4	5649.4	3132.4	-643.6	-2605.6	94.4	1406.4	-1624.6	-1092.6	-1458.6	-4976.6	-4631.6	-6812.6	-4704.6	-3077.6	-4562.6	-4631.6	-4698.6	-5989.6	-4845.6	-5155.6	-4792.6	-5710.6	-5518.6
2110-1	-1100	-719	-2805	-1229	-285	-482	-1560	-1455	-2921	1286	-3037	1359	2550	742	993	-1399	-1265	1692	23883	19722	7703	74	2743	-586	-423	-2219	-2971	-20	-1127	933	360	-4088	-3328	483	-726	-2494	-3251	-3450	-3200	-3258	-6553	-5382	-6268	-6899	-5214	-760	-4085	-6159	-6261
2110-1	7179	8633	-279	4791	3646	2427	4470	2477	471	2920	1668	-162	-3002	-2916	288	-459	-979	2171	92893	47184	45412	33941	34929	28160	21019	26172	18563	11026	411	5429	13324	18066	12292	18277	4884	10993	10052	7466	6871	11832	9865	11710	6608	639	8678	8159	5367	-2120	4676
2110-1	-658.8	-1073.8	-327.8	166.2	-991.8	9.2	-883.8	-789.8	-306.8	-41.8	-400.8	-46.8	260.2	791.2	-723.8	-144.8	715.2	-101.8	19672.2	12264.2	12459.2	9102.2	5220.2	12480.2	3883.2	5480.2	1858.2	1238.2	2303.2	1979.2	101.2	2319.2	4047.2	1571.2	-963.8	-429.8	-1151.8	-729.8	-970.8	-2317.8	-756.8	-1906.8	-136.8	-523.8	-2029.8	-1980.8	-476.8	-1468.8	-1900.8
2110-1	1781.9	1028.9	-170.1	261.9	1337.9	344.9	18.9	675.9	-110.1	87.9	-695.1	-134.1	-138.1	200.9	616.9	-332.1	605.9	-102.1	12466.9	15078.9	10905.9	8726.9	12544.9	6807.9	4416.9	6335.9	4091.9	5418.9	796.9	2821.9	1814.9	2705.9	2467.9	2985.9	2330.9	2945.9	4988.9	2075.9	2890.9	1475.9	960.9	1402.9	903.9	1556.9	2233.9	1563.9	1660.9	1204.9	1903.9
2110-1	-605.9	1328.1	-724.9	-782.9	-372.9	-690.9	174.1	-1612.9	-1184.9	-900.9	791.1	71.1	-1398.9	962.1	534.1	1417.1	505.1	-795.9	89691.1	80499.1	63847.1	63531.1	58440.1	45271.1	46569.1	34807.1	36707.1	41019.1	38159.1	32822.1	32892.1	26863.1	35524.1	27531.1	25221.1	27339.1	20224.1	25378.1	25735.1	26026.1	24987.1	16702.1	25189.1	19841.1	25956.1	16981.1	12265.1	14341.1	9576.1
2110-1	33.8	-9.2	1228.8	29.8	-416.2	-431.2	-376.2	385.8	-611.2	764.8	239.8	11.8	134.8	-691.2	-50.2	245.8	-240.2	195.8	13758.8	10391.8	11728.8	6058.8	5222.8	1670.8	1189.8	3445.8	2905.8	802.8	1415.8	2927.8	1139.8	476.8	3402.8	161.8	537.8	2561.8	2898.8	626.8	519.8	962.8	1391.8	2666.8	-197.2	-913.2	-1004.2	-912.2	56.8	418.8	392.8
2110-1	-1076.6	-819.6	-206.6	-1724.6	-898.6	-1131.6	-1643.6	-2793.6	-1741.6	-1343.6	174.4	2572.4	1343.4	1640.4	1.4	-10.6	-658.6	-1977.6	3973.4	5651.4	-392.6	-59.6	-1423.6	-208.6	-927.6	-1291.6	-1419.6	-213.6	-542.6	1984.4	-1281.6	-1071.6	-2057.6	540.4	576.4	-538.6	-73.6	-1329.6	-188.6	-1940.6	-1251.6	-1541.6	-1303.6	-845.6	-82.6	-1067.6	-1511.6	-2919.6	-1623.6
2943-1	2707.7	566.7	3199.7	3954.7	-729.3	-436.3	535.7	-40.3	2553.7	398.7	2043.7	-1756.3	538.7	2857.7	127.7	-2788.3	-1616.3	-2359.3	32754.7	40467.7	35690.7	23637.7	15523.7	8484.7	8105.7	3260.7	1190.7	2968.7	3862.7	4656.7	4723.7	1254.7	211.7	2390.7	3572.7	5091.7	2123.7	3135.7	-2437.3	-2321.3	461.7	3110.7	-844.3	5707.7	2025.7	-2002.3	2846.7	-2776.3	-3439.3
2943-1	-4306.8	-3000.8	-2969.8	-1314.8	-1905.8	-69.8	-401.8	368.2	3152.2	2784.2	405.2	1781.2	-196.8	-1856.8	263.2	-2684.8	-780.8	-2866.8	11380.2	38254.2	18902.2	12582.2	10422.2	8586.2	6318.2	8815.2	3729.2	5248.2	2639.2	7553.2	2114.2	-673.8	-2610.8	-3285.8	-5775.8	-5745.8	-1276.8	-6634.8	-5442.8	-7596.8	-9348.8	-7623.8	-6072.8	-4362.8	-4356.8	-5930.8	-4548.8	-2938.8	-6544.8
2943-1	2021.4	2189.4	1382.4	759.4	1570.4	1216.4	1040.4	-109.6	1436.4	1911.4	2205.4	-2023.6	-1225.6	-1164.6	-37.6	40.4	-927.6	-214.6	27958.4	31417.4	17543.4	12805.4	9446.4	12844.4	6895.4	7382.4	6499.4	5126.4	5931.4	3267.4	9344.4	5277.4	2077.4	4109.4	920.4	4546.4	4056.4	3845.4	3705.4	1984.4	2698.4	1939.4	-343.6	-844.6	-4825.6	311.4	-2405.6	-903.6	-2839.6
2943-1	-2080.6	-3205.6	787.4	2566.4	-2229.6	1519.4	5857.4	4481.4	4717.4	-576.6	-1126.6	-1223.6	-405.6	955.4	-1012.6	-1550.6	-650.6	873.4	25963.4	21496.4	21319.4	20396.4	20337.4	14351.4	9291.4	7273.4	4140.4	2960.4	1834.4	1801.4	478.4	-326.6	-1364.6	-524.6	-212.6	-2284.6	-2495.6	-3654.6	-2603.6	-4223.6	-4442.6	-3044.6	-3669.6	-1395.6	347.4	-2600.6	1754.4	-877.6	-409.6
2943-1	-326.5	-857.5	-154.5	-1670.5	-1459.5	-686.5	-329.5	-2055.5	-2992.5	820.5	3433.5	1571.5	-297.5	-1485.5	2014.5	-976.5	-1371.5	-716.5	86101.5	66514.5	46885.5	26577.5	16916.5	11493.5	14029.5	11499.5	10046.5	5420.5	4153.5	6638.5	6150.5	3785.5	3671.5	728.5	820.5	-1643.5	646.5	-324.5	-199.5	-1561.5	2021.5	2832.5	193.5	-2505.5	-3143.5	-3560.5	-5263.5	-2533.5	-3723.5
2943-1	759.5	3113.5	1677.5	2693.5	-564.5	173.5	-1148.5	-1784.5	-2092.5	35.5	-503.5	-2489.5	1248.5	1084.5	389.5	1749.5	1405.5	-827.5	14078.5	33228.5	17381.5	7618.5	2711.5	2829.5	5324.5	5916.5	3537.5	4474.5	775.5	2653.5	2033.5	56.5	666.5	-366.5	-2022.5	594.5	-362.5	926.5	2932.5	1989.5	1507.5	1794.5	497.5	-869.5	-42.5	-1525.5	-1542.5	-2117.5	-1272.5
2943-1	-203.3	1525.7	-1660.3	1151.7	-2572.3	-1154.3	951.7	-276.3	-101.3	167.7	996.7	141.7	-261.3	850.7	-1193.3	-844.3	166.7	76.7	15131.7	11078.7	10183.7	8985.7	6520.7	5409.7	2303.7	1783.7	6173.7	4140.7	2953.7	904.7	688.7	3146.7	2701.7	3472.7	3524.7	1198.7	-258.3	1066.7	1948.7	1865.7	1093.7	2397.7	698.7	109.7	-64.3	1544.7	7.7	2893.7	2828.7
2943-1	-483	183	-477	-1141	-1073	-791	310	132	590	36	1210	1462	-494	687	-1130	-535	-950	-876	2025	3565	3664	-346	434	698	-801	-916	38	254	335	475	-715	707	-451	-2	-403	-1117	-1159	-6	-1703	1037	-464	-141	-710	-838	-1431	-817	-1410	-395	-1145
2943-1	241.9	-537.1	-554.1	144.9	1015.9	586.9	-619.1	623.9	50.9	-673.1	1456.9	-83.1	-467.1	-1096.1	-97.1	499.9	387.9	20.9	4145.9	5652.9	5336.9	3452.9	2508.9	4220.9	2687.9	1755.9	2749.9	1789.9	1734.9	2376.9	1149.9	918.9	1146.9	2224.9	2017.9	2078.9	13.9	1751.9	2003.9	2561.9	854.9	2521.9	1113.9	2037.9	1178.9	699.9	1049.9	96.9	-192.1
2943-1	-1707.8	-428.8	-356.8	881.2	109.2	-643.8	-897.8	-529.8	-220.8	242.2	655.2	1630.2	-459.8	573.2	-513.8	-7.8	-784.8	-1113.8	7358.2	6172.2	1968.2	3277.2	1694.2	427.2	1354.2	-715.8	-323.8	1091.2	1301.2	1033.2	849.2	329.2	-1227.8	510.2	1126.2	939.2	-175.8	-1318.8	544.2	197.2	277.2	2723.2	502.2	285.2	356.2	-353.8	-932.8	-168.8	-869.8
2943-1	411	373	-156	-168	-781	-49	24	-94	162	-85	-159	-8	367	364	8	-815	455	-289	4511	4131	4869	2361	2522	1865	1156	1717	1649	1561	480	2663	2711	662	1186	1554	722	627	357	996	1527	1399	838	1184	976	598	804	1505	808	440	839
2943-1	-572.3	-810.3	-737.3	-463.3	-399.3	-600.3	-426.3	78.7	-386.3	233.7	48.7	89.7	167.7	-298.3	-315.3	-245.3	143.7	561.7	8493.7	15505.7	14010.7	6050.7	2900.7	3576.7	3567.7	943.7	3529.7	911.7	1732.7	1963.7	1174.7	1265.7	2469.7	1125.7	2832.7	648.7	1842.7	741.7	37.7	46.7	962.7	200.7	481.7	214.7	1199.7	512.7	818.7	1294.7	1399.7
2943-1	693.9	673.9	-60.1	312.9	-278.1	-412.1	-160.1	-241.1	-85.1	-340.1	355.9	-465.1	272.9	28.9	159.9	-171.1	-203.1	446.9	3841.9	2420.9	1262.9	2484.9	734.9	991.9	554.9	-44.1	897.9	3.9	-75.1	262.9	896.9	612.9	-185.1	49.9	-138.1	262.9	607.9	-50.1	-230.1	-166.1	-198.1	-108.1	-433.1	-301.1	2306.9	1746.9	985.9	-360.1	-83.1
2943-1	-175.3	170.7	-46.3	-40.3	-124.3	405.7	17.7	-387.3	-431.3	-546.3	211.7	8.7	-10.3	345.7	-116.3	-145.3	305.7	377.7	4250.7	2064.7	1431.7	1503.7	887.7	1656.7	1461.7	793.7	743.7	301.7	516.7	285.7	501.7	1028.7	381.7	398.7	-117.3	596.7	856.7	-99.3	-122.3	455.7	147.7	463.7	664.7	350.7	638.7	102.7	658.7	-12.3	-166.3
2943-1	97.7	588.7	141.7	-458.3	-800.3	-84.3	193.7	-608.3	-70.3	-152.3	-106.3	-185.3	-15.3	6.7	331.7	-335.3	62.7	463.7	5771.7	2617.7	2377.7	1304.7	1456.7	1865.7	1199.7	744.7	629.7	404.7	2494.7	2307.7	2561.7	898.7	1175.7	695.7	312.7	194.7	441.7	304.7	-95.3	-58.3	226.7	-217.3	59.7	783.7	11.7	-156.3	-131.3	64.7	432.7
2943-1	-781	-123	-736	-121	40	340	681	896	38	-43	122	370	169	-454	442	50	-607	-87	10182	5015	5825	3122	3912	1383	1506	921	772	1281	1063	595	115	614	-58	244	540	461	1496	1281	383	-12	153	169	194	1675	470	578	281	616	1543
2943-1	361.9	295.9	1541.9	778.9	1819.9	1018.9	575.9	233.9	-176.1	233.9	523.9	548.9	-382.1	-609.1	-121.1	230.9	-316.1	66.9	12718.9	9756.9	6108.9	2581.9	2016.9	2254.9	1656.9	2622.9	3552.9	3127.9	1609.9	1198.9	1498.9	1113.9	866.9	783.9	1200.9	386.9	478.9	1013.9	314.9	968.9	-126.1	-267.1	324.9	-101.1	508.9	672.9	502.9	1350.9	716.9
2943-1	-63.8	228.2	16.2	-26.8	-229.8	674.2	-262.8	-44.8	-85.8	-127.8	28.2	-329.8	-245.8	30.2	-304.8	-477.8	756.2	757.2	9226.2	11442.2	7868.2	5830.2	3649.2	2865.2	2147.2	1968.2	1610.2	1986.2	704.2	608.2	1354.2	1086.2	1504.2	721.2	1324.2	1587.2	331.2	1151.2	578.2	269.2	573.2	313.2	-92.8	203.2	-134.8	312.2	32.2	-208.8	336.2
2943-1	590.8	666.8	767.8	41.8	82.8	501.8	225.8	-80.2	42.8	-128.2	-84.2	-38.2	-233.2	271.8	-70.2	109.8	257.8	-128.2	4839.8	5088.8	2376.8	1842.8	677.8	272.8	861.8	448.8	680.8	909.8	402.8	909.8	598.8	79.8	551.8	1217.8	1374.8	618.8	465.8	496.8	193.8	474.8	190.8	700.8	722.8	298.8	1015.8	1185.8	1327.8	2141.8	1683.8
2943-1	-548.4	-131.4	295.6	768.6	205.6	33.6	-7.4	-424.4	-772.4	254.6	-214.4	-19.4	827.6	-385.4	7.6	423.6	-196.4	74.6	8544.6	11813.6	9992.6	9381.6	6372.6	4168.6	5095.6	4572.6	4897.6	5249.6	5153.6	2869.6	2640.6	2904.6	2184.6	1529.6	1758.6	2051.6	3130.6	2877.6	411.6	1736.6	774.6	309.6	2324.6	2386.6	2660.6	1672.6	806.6	397.6	774.6
2943-1	435.7	246.7	212.7	857.7	240.7	118.7	-175.3	-404.3	-345.3	-21.3	-54.3	113.7	168.7	-6.3	413.7	-125.3	-380.3	236.7	3521.7	2704.7	2663.7	1383.7	183.7	544.7	969.7	73.7	641.7	167.7	-330.3	-71.3	101.7	505.7	593.7	-325.3	-355.3	552.7	16.7	461.7	420.7	-131.3	-187.3	-642.3	126.7	-166.3	50.7	-305.3	926.7	227.7	127.7
2943-2	-563.2	885.8	-697.2	292.8	1467.8	-2443.2	-2018.2	-517.2	-1326.2	800.8	2121.8	1647.8	69.8	-680.2	-1912.2	-3405.2	-1855.2	4538.8	19845.8	13225.8	8244.8	5441.8	4722.8	2366.8	2540.8	3246.8	-664.2	3631.8	-106.2	1235.8	-1862.2	-4115.2	-2047.2	-3353.2	-3362.2	-2532.2	-1463.2	-2432.2	-2844.2	-78.2	-3573.2	-2957.2	-3342.2	-3477.2	-4157.2	-3090.2	-5669.2	-4996.2	-3625.2
2943-2	1576.5	730.5	-374.5	-104.5	446.5	1626.5	1003.5	1484.5	323.5	696.5	-261.5	-454.5	386.5	92.5	-729.5	-891.5	-146.5	984.5	15273.5	9856.5	5605.5	5694.5	4556.5	3104.5	3392.5	1935.5	3501.5	3840.5	3325.5	2486.5	2703.5	2027.5	2039.5	2239.5	2335.5	1457.5	1573.5	1147.5	30.5	647.5	2030.5	2368.5	1837.5	1417.5	1559.5	1632.5	2129.5	1111.5	1066.5
2943-2	96.4	119.4	-245.6	-353.6	-10.6	-60.6	350.4	499.4	131.4	-664.6	-309.6	-81.6	-148.6	-186.6	441.4	406.4	-192.6	604.4	6635.4	5520.4	2779.4	3208.4	3004.4	3165.4	1264.4	1151.4	1346.4	324.4	1358.4	1201.4	742.4	437.4	1279.4	272.4	1142.4	2006.4	1175.4	2113.4	1050.4	765.4	535.4	749.4	1158.4	535.4	664.4	122.4	846.4	2815.4	2650.4
2943-2	-148.1	-616.1	-147.1	-401.1	-28.1	-272.1	291.9	-388.1	-698.1	-945.1	168.9	-605.1	206.9	395.9	-244.1	-302.1	295.9	1726.9	22292.9	17479.9	10161.9	9167.9	5643.9	6474.9	6966.9	3372.9	2036.9	1879.9	1108.9	3045.9	2421.9	2369.9	628.9	2162.9	810.9	615.9	-990.1	56.9	1999.9	738.9	734.9	713.9	245.9	510.9	720.9	-92.1	-422.1	-116.1	-472.1
2943-2	428.8	883.8	1262.8	189.8	692.8	1084.8	466.8	1083.8	77.8	1408.8	-631.2	2006.8	-508.2	-985.2	-265.2	-943.2	-157.2	-3.2	8528.8	10442.8	5801.8	4285.8	3724.8	838.8	92.8	2239.8	1814.8	-704.2	-533.2	-363.2	-1061.2	-697.2	-959.2	433.8	-560.2	-639.2	-841.2	-631.2	-1339.2	-2217.2	-2147.2	-416.2	-772.2	-1069.2	-1573.2	-2180.2	-1574.2	-1867.2	-1126.2
2943-2	1706.8	1994.8	1575.8	2374.8	1684.8	251.8	-1654.2	-1433.2	-2553.2	-514.2	807.8	1720.8	1708.8	1140.8	454.8	-416.2	-1428.2	-921.2	8778.8	2755.8	2367.8	1485.8	4362.8	3057.8	2786.8	-206.2	699.8	641.8	1511.8	1759.8	197.8	801.8	1976.8	2791.8	427.8	1774.8	1637.8	2286.8	3260.8	3442.8	955.8	2038.8	992.8	2031.8	1605.8	330.8	899.8	234.8	938.8
2943-2	133.3	677.3	-266.7	-0.7	-719.7	-561.7	125.3	246.3	-50.7	818.3	-239.7	413.3	119.3	-606.7	-747.7	163.3	-242.7	373.3	5986.3	3731.3	2815.3	2354.3	1910.3	2816.3	3130.3	2528.3	1516.3	3327.3	2277.3	3072.3	600.3	932.3	879.3	450.3	1226.3	596.3	83.3	903.3	1242.3	1700.3	1714.3	1410.3	337.3	1236.3	-260.7	-81.7	413.3	-239.7	-566.7
frame	-18	-17	-16	-15	-14	-13	-12	-11	-10	-9	-8	-7	-6	-5	-4	-3	-2	-1	0	1	2	3	4	5	6	7	8	9	10	11	12	13	14	15	16	17	18	19	20	21	22	23	24	25	26	27	28	29	30
Av	634.744	678.625	463.829	710.388	263.761	340.354	356.236	-8.06949	44.4051	295.473	234.354	61.5068	59.2356	-22.0864	-89.9	-316.68	-93.4085	-172.9	22502	20143.7	14963.7	11504.8	10167.1	8257.41	6720.02	5902.7	5603.44	4700.37	3867.43	3427.9	3328	2968.63	2452.14	2084.95	1786.44	1460.68	1364.27	784.256	824.205	885.476	548.307	614.171	294.222	237.731	388.459	-37.439	-120.32	-383.049	-726.337
SEM	310.433	282.249	267.748	305.617	230.025	267.471	247.305	187.156	207.253	161.711	150.729	155.598	150.252	144.058	113.455	137.578	214.365	195.887	3661.93	3027.7	2431.69	2139.4	2035.58	1516.32	1446.91	1365.53	1387.5	1242.5	1164.11	1009.86	914.694	1003.17	923.925	864.684	783.112	774.765	712.523	755.051	678.379	732.711	698.381	612.623	649.645	609.146	689.48	512.718	513.159	504.806	458.505
	33.4076	35.7171	24.412	37.3888	13.8822	17.9134	18.7492	-0.42471	2.33711	15.5512	12.3344	3.2372	3.11766	-1.16244	-4.73158	-16.6674	-4.91624	-9.1	1184.32	1060.2	787.563	605.518	535.109	434.6	353.685	310.668	294.918	247.388	203.549	180.416	175.158	156.244	129.06	109.734	94.0233	76.8779	71.8038	41.2766	43.3792	46.604	28.8583	32.3248	15.4854	12.5121	20.4452	-1.97047	-6.33265	-20.1605	-38.2283
	16.3386	14.8552	14.092	16.0851	12.1066	14.0774	13.016	9.85033	10.908	8.5111	7.93308	8.18937	7.90802	7.58201	5.97134	7.24096	11.2824	10.3099	192.733	159.352	127.983	112.6	107.136	79.8061	76.1532	71.87	73.0262	65.3948	61.2692	53.1504	48.1418	52.7982	48.6276	45.5097	41.2164	40.7771	37.5012	39.7395	35.7042	38.5637	36.7569	32.2433	34.1918	32.0603	36.2884	26.9851	27.0083	26.5687	24.1318
[truncated: 454 more columns]

## Sheet: Panel A
Av	1.59784	1.32751			1.43312	1.2904			1.17306	1.45997			0.323044	1.34615			Ttest	R	S
Median	1	1			1	1			0.663786	1.07586			0.208887	1.07578			MOR	1.67126e-14	3.49055e-06
	MOR control				DOR control				MOR + DAMGO				DOR + DADLE				DOR	0	0.0291568
					3376								2934
	n	3520			n	3376			n	3053			n	2934			K-S test	R	S
	SEP	mCh	Freq		SEP	mCh	Freq		SEP	mCh	Freq		SEP	mCh	Freq		MOR	2.3896e-49	7.2613e-04
	-1.36646	0.053392	0.000284091		-0.345464	0.0402117	0.000296209		-1.65925	0.103249	0.000327547		-0.206416	0.0761062	0.000340832		DOR	0	5.0850e-04
	-0.678812	0.0534684	0.000568182		-0.320514	0.0728223	0.000592417		-1.45131	0.12156	0.000655093		-0.198974	0.0799205	0.000681663
	-0.635317	0.0667425	0.000852273		-0.279451	0.0743894	0.000888626		-1.06753	0.124119	0.00098264		-0.194506	0.090518	0.00102249
	-0.57393	0.0685383	0.00113636		-0.26566	0.0788166	0.00118483		-1.05799	0.125514	0.00131019		-0.189111	0.0909968	0.00136333
	-0.566879	0.0686988	0.00142045		-0.256311	0.081773	0.00148104		-1.03395	0.129457	0.00163773		-0.183881	0.0930065	0.00170416
	-0.549357	0.0727573	0.00170455		-0.250611	0.0931392	0.00177725		-0.920637	0.129981	0.00196528		-0.180688	0.0944913	0.00204499
	-0.546959	0.0872288	0.00198864		-0.222686	0.0938759	0.00207346		-0.786665	0.13834	0.00229283		-0.177501	0.111554	0.00238582
	-0.454632	0.0898502	0.00227273		-0.197529	0.0992436	0.00236967		-0.781458	0.141771	0.00262037		-0.153741	0.114816	0.00272665
	-0.449368	0.0898697	0.00255682		-0.180848	0.102537	0.00266588		-0.720102	0.142383	0.00294792		-0.15371	0.117055	0.00306748
	-0.41342	0.091851	0.00284091		-0.171602	0.103882	0.00296209		-0.659855	0.146699	0.00327547		-0.153328	0.123347	0.00340832
	-0.411483	0.100356	0.003125		-0.164797	0.109816	0.00325829		-0.614233	0.148997	0.00360301		-0.152136	0.124512	0.00374915
	-0.407848	0.105561	0.00340909		-0.140341	0.115124	0.0035545		-0.556745	0.151678	0.00393056		-0.151956	0.125639	0.00408998
	-0.398266	0.105957	0.00369318		-0.137514	0.115357	0.00385071		-0.436508	0.152322	0.00425811		-0.151745	0.126465	0.00443081
	-0.396303	0.106089	0.00397727		-0.133389	0.116262	0.00414692		-0.43009	0.1546	0.00458565		-0.149411	0.1273	0.00477164
	-0.390998	0.108057	0.00426136		-0.101548	0.116439	0.00444313		-0.426735	0.158229	0.0049132		-0.144994	0.133915	0.00511247
	-0.371686	0.109531	0.00454545		-0.101017	0.117877	0.00473934		-0.389075	0.1589	0.00524075		-0.143364	0.134143	0.00545331
	-0.368501	0.110488	0.00482955		-0.090658	0.118255	0.00503555		-0.38332	0.160629	0.00556829		-0.142196	0.135796	0.00579414
	-0.36061	0.110743	0.00511364		-0.0888454	0.118386	0.00533175		-0.376597	0.160768	0.00589584		-0.140663	0.136018	0.00613497
	-0.35635	0.114671	0.00539773		-0.0742655	0.121196	0.00562796		-0.36582	0.163795	0.00622339		-0.139019	0.139869	0.0064758
	-0.352722	0.118207	0.00568182		-0.0687082	0.121209	0.00592417		-0.363752	0.165016	0.00655093		-0.128932	0.139973	0.00681663
	-0.348199	0.118485	0.00596591		-0.0638318	0.12416	0.00622038		-0.361427	0.165249	0.00687848		-0.125336	0.141064	0.00715746
	-0.346369	0.118649	0.00625		-0.0636606	0.124422	0.00651659		-0.348688	0.167073	0.00720603		-0.119531	0.145736	0.0074983
	-0.336733	0.119622	0.00653409		-0.0631321	0.125858	0.0068128		-0.33622	0.168124	0.00753357		-0.118175	0.147131	0.00783913
	-0.329959	0.119911	0.00681818		-0.063111	0.127155	0.007109		-0.335634	0.170658	0.00786112		-0.117982	0.147863	0.00817996
	-0.325126	0.123757	0.00710227		-0.0568237	0.128321	0.00740521		-0.335337	0.17091	0.00818867		-0.116149	0.148416	0.00852079
	-0.322827	0.125053	0.00738636		-0.0542696	0.128507	0.00770142		-0.334783	0.172982	0.00851621		-0.115103	0.148418	0.00886162
	-0.322393	0.128879	0.00767045		-0.0506142	0.132007	0.00799763		-0.331148	0.173045	0.00884376		-0.111796	0.157016	0.00920245
	-0.317065	0.129071	0.00795455		-0.0493472	0.133569	0.00829384		-0.322678	0.176098	0.00917131		-0.108109	0.157316	0.00954329
	-0.316245	0.129617	0.00823864		-0.0483578	0.135305	0.00859005		-0.31642	0.177291	0.00949885		-0.106202	0.157339	0.00988412
	-0.306408	0.129955	0.00852273		-0.0480137	0.136281	0.00888626		-0.311576	0.177594	0.0098264		-0.105493	0.158713	0.0102249
	-0.305588	0.133636	0.00880682		-0.0388359	0.136737	0.00918246		-0.297542	0.177811	0.0101539		-0.105071	0.159326	0.0105658
	-0.302206	0.137446	0.00909091		-0.037817	0.136924	0.00947867		-0.292872	0.177891	0.0104815		-0.103037	0.160984	0.0109066
	-0.298062	0.137679	0.009375		-0.0331203	0.138317	0.00977488		-0.282491	0.179104	0.010809		-0.0999597	0.16205	0.0112474
	-0.283656	0.13801	0.00965909		-0.0270691	0.139427	0.0100711		-0.279504	0.179111	0.0111366		-0.0990697	0.162068	0.0115883
	-0.278644	0.139101	0.00994318		-0.0265982	0.139687	0.0103673		-0.279435	0.180989	0.0114641		-0.0989247	0.163171	0.0119291
	-0.275445	0.139403	0.0102273		-0.0252567	0.140645	0.0106635		-0.278842	0.18278	0.0117917		-0.098698	0.16435	0.0122699
	-0.267062	0.140003	0.0105114		-0.0245712	0.140893	0.0109597		-0.266979	0.185411	0.0121192		-0.0985739	0.164518	0.0126108
	-0.259238	0.142126	0.0107955		-0.0206581	0.141236	0.0112559		-0.266215	0.185449	0.0124468		-0.0974966	0.164724	0.0129516
	-0.256707	0.143165	0.0110795		-0.0194987	0.141289	0.0115521		-0.259973	0.186171	0.0127743		-0.0971103	0.171034	0.0132924
	-0.254994	0.143544	0.0113636		-0.0179166	0.141786	0.0118483		-0.257007	0.191468	0.0131019		-0.0955513	0.175526	0.0136333
	-0.243624	0.144053	0.0116477		-0.0150549	0.142232	0.0121445		-0.248576	0.193352	0.0134294		-0.0943685	0.176215	0.0139741
	-0.240087	0.145729	0.0119318		-0.0138206	0.146384	0.0124408		-0.240302	0.195174	0.013757		-0.094352	0.178105	0.0143149
	-0.23881	0.146991	0.0122159		-0.0125515	0.148082	0.012737		-0.234099	0.196848	0.0140845		-0.0941525	0.178269	0.0146558
	-0.231653	0.147157	0.0125		-0.00940119	0.149079	0.0130332		-0.232559	0.197245	0.0144121		-0.0925258	0.180704	0.0149966
	-0.226087	0.147779	0.0127841		-0.00417892	0.149263	0.0133294		-0.224676	0.197925	0.0147396		-0.0888479	0.180841	0.0153374
	-0.221338	0.149501	0.0130682		-0.00249411	0.149292	0.0136256		-0.223898	0.199226	0.0150671		-0.0857406	0.185003	0.0156783
	-0.220588	0.151991	0.0133523		-0.000929406	0.150081	0.0139218		-0.223433	0.199863	0.0153947		-0.0844032	0.188202	0.0160191
	-0.220574	0.153194	0.0136364		0.000393009	0.153932	0.014218		-0.219659	0.201151	0.0157222		-0.0833912	0.188999	0.0163599
	-0.210949	0.153276	0.0139205		0.00306912	0.156111	0.0145142		-0.21873	0.201995	0.0160498		-0.0831649	0.190258	0.0167007
	-0.206803	0.153847	0.0142045		0.00701667	0.156437	0.0148104		-0.217255	0.202079	0.0163773		-0.0821809	0.190353	0.0170416
	-0.205576	0.15602	0.0144886		0.00705395	0.156631	0.0151066		-0.214774	0.203156	0.0167049		-0.0810364	0.193023	0.0173824
	-0.203825	0.157035	0.0147727		0.00718071	0.157371	0.0154028		-0.212892	0.205136	0.0170324		-0.0809794	0.195408	0.0177232
	-0.197642	0.157176	0.0150568		0.0076687	0.157834	0.0156991		-0.210005	0.206489	0.01736		-0.080288	0.196935	0.0180641
	-0.196753	0.157904	0.0153409		0.00819153	0.161508	0.0159953		-0.208356	0.20704	0.0176875		-0.0782791	0.197412	0.0184049
	-0.191358	0.158336	0.015625		0.00906813	0.163062	0.0162915		-0.208146	0.207982	0.0180151		-0.077558	0.197706	0.0187457
	-0.179148	0.159404	0.0159091		0.00924321	0.163123	0.0165877		-0.202279	0.208887	0.0183426		-0.076282	0.19787	0.0190866
	-0.177568	0.160317	0.0161932		0.00974284	0.163296	0.0168839		-0.198543	0.213158	0.0186702		-0.0760401	0.203591	0.0194274
	-0.174794	0.161081	0.0164773		0.00999924	0.163801	0.0171801		-0.197933	0.215623	0.0189977		-0.0757036	0.20369	0.0197682
	-0.173369	0.161112	0.0167614		0.0101986	0.165918	0.0174763		-0.194552	0.21627	0.0193253		-0.0750207	0.204049	0.0201091
	-0.166493	0.161431	0.0170455		0.0129809	0.167371	0.0177725		-0.194345	0.217133	0.0196528		-0.0747856	0.204607	0.0204499
	-0.164258	0.162315	0.0173295		0.0136864	0.167512	0.0180687		-0.192214	0.217682	0.0199803		-0.0744975	0.206004	0.0207907
	-0.160412	0.164815	0.0176136		0.0138729	0.168517	0.0183649		-0.189717	0.220772	0.0203079		-0.0744678	0.207353	0.0211316
	-0.155545	0.164906	0.0178977		0.0157796	0.170107	0.0186611		-0.189018	0.221393	0.0206354		-0.0733702	0.208352	0.0214724
	-0.155117	0.165642	0.0181818		0.0164515	0.171946	0.0189573		-0.188412	0.221997	0.020963		-0.0729948	0.208688	0.0218132
	-0.154806	0.165709	0.0184659		0.0182895	0.174653	0.0192536		-0.186829	0.222949	0.0212905		-0.0722943	0.208736	0.0221541
	-0.152961	0.165897	0.01875		0.0189977	0.175112	0.0195498		-0.186559	0.223248	0.0216181		-0.0722495	0.209707	0.0224949
	-0.150442	0.165987	0.0190341		0.0195173	0.175615	0.019846		-0.183544	0.224387	0.0219456		-0.0718831	0.211844	0.0228357
	-0.147783	0.166926	0.0193182		0.0196894	0.175723	0.0201422		-0.183497	0.224427	0.0222732		-0.0700067	0.212361	0.0231766
	-0.145934	0.167095	0.0196023		0.020522	0.175874	0.0204384		-0.182942	0.224797	0.0226007		-0.0697645	0.212491	0.0235174
	-0.142865	0.169883	0.0198864		0.0213038	0.176704	0.0207346		-0.18191	0.225161	0.0229283		-0.0695921	0.213254	0.0238582
	-0.138762	0.173122	0.0201705		0.0225572	0.177236	0.0210308		-0.181236	0.226698	0.0232558		-0.0693134	0.214256	0.024199
	-0.13708	0.17335	0.0204545		0.0234256	0.177743	0.021327		-0.180071	0.226701	0.0235834		-0.0688402	0.214258	0.0245399
	-0.132987	0.174454	0.0207386		0.0244348	0.17958	0.0216232		-0.178133	0.226963	0.0239109		-0.0679814	0.214501	0.0248807
	-0.132351	0.177006	0.0210227		0.0255351	0.180555	0.0219194		-0.177068	0.229006	0.0242385		-0.0679479	0.214661	0.0252215
	-0.13058	0.180069	0.0213068		0.0273084	0.182334	0.0222156		-0.176792	0.229129	0.024566		-0.067175	0.215032	0.0255624
	-0.128203	0.180213	0.0215909		0.0288918	0.182638	0.0225118		-0.1752	0.229302	0.0248935		-0.0666597	0.215496	0.0259032
	-0.122898	0.181882	0.021875		0.0293602	0.183868	0.0228081		-0.173476	0.229521	0.0252211		-0.0649033	0.21587	0.026244
	-0.119683	0.184006	0.0221591		0.0298705	0.185422	0.0231043		-0.173457	0.230384	0.0255486		-0.0647422	0.217015	0.0265849
	-0.118339	0.186616	0.0224432		0.0307576	0.186502	0.0234005		-0.17168	0.23134	0.0258762		-0.0645069	0.217136	0.0269257
	-0.113297	0.187057	0.0227273		0.0336878	0.18719	0.0236967		-0.164211	0.231397	0.0262037		-0.063488	0.21718	0.0272665
	-0.112864	0.187266	0.0230114		0.0338458	0.188683	0.0239929		-0.163547	0.23253	0.0265313		-0.0624794	0.223211	0.0276074
	-0.112001	0.18739	0.0232955		0.0345613	0.190746	0.0242891		-0.160858	0.233384	0.0268588		-0.0613941	0.22446	0.0279482
	-0.111383	0.190016	0.0235795		0.0355642	0.194794	0.0245853		-0.155005	0.235244	0.0271864		-0.060908	0.225139	0.028289
	-0.109779	0.190506	0.0238636		0.0363621	0.197169	0.0248815		-0.151979	0.235728	0.0275139		-0.0607464	0.225251	0.0286299
	-0.107365	0.192785	0.0241477		0.0369018	0.197386	0.0251777		-0.150263	0.235742	0.0278415		-0.0607463	0.225552	0.0289707
	-0.106516	0.194921	0.0244318		0.0381971	0.198471	0.0254739		-0.149672	0.237389	0.028169		-0.0599905	0.225816	0.0293115
	-0.106092	0.195343	0.0247159		0.0388896	0.199525	0.0257701		-0.149242	0.237497	0.0284966		-0.0599314	0.226426	0.0296524
	-0.104531	0.195397	0.025		0.0424521	0.201269	0.0260664		-0.148553	0.238348	0.0288241		-0.0599108	0.231695	0.0299932
	-0.0983197	0.196022	0.0252841		0.0434682	0.202008	0.0263626		-0.147569	0.240726	0.0291517		-0.0598666	0.231915	0.030334
	-0.0974308	0.196357	0.0255682		0.0439445	0.202017	0.0266588		-0.147013	0.241248	0.0294792		-0.0585842	0.23316	0.0306748
	-0.0965392	0.196534	0.0258523		0.0455296	0.203782	0.026955		-0.144437	0.241697	0.0298067		-0.0580529	0.234194	0.0310157
	-0.0936615	0.196738	0.0261364		0.0458216	0.204707	0.0272512		-0.140184	0.241852	0.0301343		-0.0575536	0.235019	0.0313565
	-0.0935454	0.196862	0.0264205		0.0470288	0.204977	0.0275474		-0.13976	0.243304	0.0304618		-0.0575169	0.23506	0.0316973
	-0.0924551	0.197149	0.0267045		0.0473159	0.205335	0.0278436		-0.133956	0.243575	0.0307894		-0.0574048	0.238003	0.0320382
	-0.0923691	0.198395	0.0269886		0.0481146	0.207107	0.0281398		-0.128277	0.24362	0.0311169		-0.0567553	0.238497	0.032379
	-0.0873112	0.200203	0.0272727		0.0491423	0.207282	0.028436		-0.127472	0.243823	0.0314445		-0.0565521	0.238545	0.0327198
	-0.0870746	0.200484	0.0275568		0.0496581	0.209872	0.0287322		-0.124835	0.245066	0.031772		-0.0564961	0.239441	0.0330607
	-0.0857149	0.202206	0.0278409		0.050125	0.210359	0.0290284		-0.123559	0.245083	0.0320996		-0.0561736	0.239522	0.0334015
	-0.0846154	0.2031	0.028125		0.0514275	0.210815	0.0293246		-0.123124	0.245191	0.0324271		-0.0544704	0.239706	0.0337423
	-0.0846056	0.203476	0.0284091		0.0515875	0.211303	0.0296209		-0.11959	0.245727	0.0327547		-0.0543695	0.240278	0.0340832
	-0.0844452	0.204764	0.0286932		0.0548061	0.212865	0.0299171		-0.119426	0.245805	0.0330822		-0.0543229	0.240781	0.034424
	-0.0827001	0.204951	0.0289773		0.0558156	0.213674	0.0302133		-0.117778	0.246124	0.0334098		-0.0540919	0.242672	0.0347648
	-0.0805042	0.205114	0.0292614		0.0565922	0.214218	0.0305095		-0.114504	0.24618	0.0337373		-0.0540852	0.243931	0.0351057
	-0.08029	0.205192	0.0295455		0.0566954	0.215174	0.0308057		-0.113873	0.248079	0.0340649		-0.053951	0.248025	0.0354465
	-0.0790342	0.205439	0.0298295		0.0567588	0.21743	0.0311019		-0.110768	0.248183	0.0343924		-0.0535606	0.248529	0.0357873
	-0.0784676	0.205503	0.0301136		0.0572855	0.218297	0.0313981		-0.110309	0.248631	0.0347199		-0.0523387	0.248753	0.0361282
	-0.0758429	0.206394	0.0303977		0.0576104	0.218584	0.0316943		-0.109434	0.249807	0.0350475		-0.0512799	0.251764	0.036469
	-0.0748836	0.208502	0.0306818		0.0579142	0.219969	0.0319905		-0.108493	0.250812	0.035375		-0.0512263	0.253198	0.0368098
	-0.0741653	0.210762	0.0309659		0.0589776	0.221367	0.0322867		-0.108002	0.251518	0.0357026		-0.0500635	0.253931	0.0371506
	-0.0734056	0.211348	0.03125		0.0593505	0.222885	0.0325829		-0.10578	0.253064	0.0360301		-0.0498392	0.256739	0.0374915
	-0.0710362	0.211778	0.0315341		0.0612695	0.222915	0.0328791		-0.104297	0.254302	0.0363577		-0.0490796	0.259971	0.0378323
	-0.0692278	0.212286	0.0318182		0.0620941	0.223398	0.0331754		-0.104179	0.254602	0.0366852		-0.047704	0.260658	0.0381731
	-0.0673373	0.213395	0.0321023		0.0621524	0.22552	0.0334716		-0.102446	0.255404	0.0370128		-0.0475289	0.260782	0.038514
	-0.0618673	0.213523	0.0323864		0.0638971	0.226558	0.0337678		-0.100561	0.255479	0.0373403		-0.0472391	0.260976	0.0388548
	-0.0601581	0.214426	0.0326705		0.0641485	0.22672	0.034064		-0.0995091	0.255664	0.0376679		-0.047014	0.261524	0.0391956
	-0.0547003	0.215748	0.0329545		0.0647762	0.229765	0.0343602		-0.0983676	0.255753	0.0379954		-0.0468515	0.261549	0.0395365
	-0.0527197	0.215992	0.0332386		0.065216	0.229888	0.0346564		-0.0982559	0.255929	0.038323		-0.0464322	0.264548	0.0398773
	-0.0512735	0.216067	0.0335227		0.0653658	0.230048	0.0349526		-0.0979322	0.257793	0.0386505		-0.0442826	0.264762	0.0402181
	-0.051173	0.217735	0.0338068		0.067669	0.230472	0.0352488		-0.0928633	0.25849	0.0389781		-0.0439687	0.267694	0.040559
	-0.0500588	0.218494	0.0340909		0.0699894	0.231476	0.035545		-0.0909606	0.259179	0.0393056		-0.0438747	0.268671	0.0408998
	-0.0477223	0.220302	0.034375		0.0712959	0.232225	0.0358412		-0.0899513	0.259431	0.0396331		-0.0436957	0.269247	0.0412406
	-0.0472569	0.221612	0.0346591		0.0735339	0.232442	0.0361374		-0.08962	0.260157	0.0399607		-0.0434115	0.270147	0.0415815
	-0.0455631	0.223141	0.0349432		0.0736879	0.235479	0.0364336		-0.0894646	0.260704	0.0402882		-0.0434034	0.270858	0.0419223
	-0.0446118	0.223603	0.0352273		0.073897	0.235799	0.0367299		-0.0891741	0.262372	0.0406158		-0.0433933	0.272195	0.0422631
	-0.0428493	0.224414	0.0355114		0.0747742	0.236346	0.0370261		-0.0876852	0.262488	0.0409433		-0.0426742	0.272516	0.042604
	-0.0395628	0.224428	0.0357955		0.0754109	0.237317	0.0373223		-0.0842817	0.263804	0.0412709		-0.0424902	0.27273	0.0429448
	-0.0377482	0.224733	0.0360795		0.0761685	0.238059	0.0376185		-0.0821706	0.264148	0.0415984		-0.0424187	0.27341	0.0432856
	-0.0376284	0.224939	0.0363636		0.0766457	0.239516	0.0379147		-0.0817326	0.265281	0.041926		-0.0421023	0.273553	0.0436264
	-0.0373443	0.226104	0.0366477		0.0769976	0.241977	0.0382109		-0.0813153	0.267022	0.0422535		-0.0419081	0.275287	0.0439673
	-0.0367987	0.226293	0.0369318		0.0799401	0.241988	0.0385071		-0.0804295	0.270791	0.0425811		-0.0411174	0.27624	0.0443081
	-0.035817	0.227717	0.0372159		0.0812849	0.242307	0.0388033		-0.0781075	0.270922	0.0429086		-0.0408227	0.277569	0.0446489
	-0.0341605	0.22879	0.0375		0.0837421	0.242382	0.0390995		-0.0766121	0.271274	0.0432362		-0.0404621	0.279058	0.0449898
	-0.0326811	0.229327	0.0377841		0.0839514	0.24345	0.0393957		-0.0756691	0.271804	0.0435637		-0.0401017	0.280099	0.0453306
	-0.0294179	0.23016	0.0380682		0.0843845	0.243994	0.0396919		-0.0745321	0.273516	0.0438913		-0.0400568	0.280167	0.0456714
	-0.0282202	0.231542	0.0383523		0.0845197	0.244194	0.0399882		-0.0732416	0.274168	0.0442188		-0.0396311	0.283582	0.0460123
	-0.0280162	0.231601	0.0386364		0.0846481	0.245004	0.0402844		-0.0707565	0.274779	0.0445463		-0.0395734	0.286642	0.0463531
	-0.0275505	0.231606	0.0389205		0.0856136	0.245389	0.0405806		-0.0669015	0.275377	0.0448739		-0.0390409	0.286936	0.0466939
	-0.0265015	0.233362	0.0392045		0.0856763	0.245394	0.0408768		-0.0650567	0.27624	0.0452014		-0.038527	0.287804	0.0470348
	-0.0263068	0.234005	0.0394886		0.0860628	0.245435	0.041173		-0.0642446	0.27672	0.045529		-0.0384559	0.288198	0.0473756
	-0.0257075	0.234389	0.0397727		0.0883236	0.24687	0.0414692		-0.0625742	0.277015	0.0458565		-0.0381444	0.290037	0.0477164
	-0.0229788	0.236027	0.0400568		0.0895803	0.246885	0.0417654		-0.0623161	0.277082	0.0461841		-0.0378604	0.29009	0.0480573
	-0.021985	0.237095	0.0403409		0.0903634	0.247119	0.0420616		-0.0613505	0.279595	0.0465116		-0.037289	0.29061	0.0483981
	-0.0215552	0.237381	0.040625		0.0920677	0.247308	0.0423578		-0.0605158	0.280358	0.0468392		-0.0367211	0.290746	0.0487389
	-0.0212513	0.23742	0.0409091		0.0924719	0.247338	0.042654		-0.0595207	0.280607	0.0471667		-0.0365733	0.292386	0.0490798
	-0.0186771	0.237801	0.0411932		0.0949376	0.24781	0.0429502		-0.0572555	0.281982	0.0474943		-0.0353531	0.292409	0.0494206
	-0.0176041	0.238069	0.0414773		0.0950723	0.247827	0.0432464		-0.0571985	0.28205	0.0478218		-0.0344123	0.292618	0.0497614
	-0.0175318	0.238094	0.0417614		0.0968922	0.249527	0.0435427		-0.0557361	0.282218	0.0481494		-0.0336504	0.292811	0.0501022
	-0.016818	0.238615	0.0420455		0.0971095	0.249563	0.0438389		-0.0556883	0.284191	0.0484769		-0.0334947	0.292852	0.0504431
	-0.0139878	0.238776	0.0423295		0.0973482	0.249936	0.0441351		-0.0555692	0.284653	0.0488045		-0.0333425	0.293029	0.0507839
	-0.0118955	0.239042	0.0426136		0.097868	0.250205	0.0444313		-0.0552237	0.285759	0.049132		-0.0332174	0.293801	0.0511247
	-0.0110661	0.240876	0.0428977		0.0979981	0.250261	0.0447275		-0.0545191	0.286897	0.0494595		-0.0331824	0.294285	0.0514656
	-0.00948813	0.241217	0.0431818		0.0983472	0.250411	0.0450237		-0.0539153	0.28729	0.0497871		-0.0328308	0.294833	0.0518064
	-0.00947235	0.24169	0.0434659		0.100213	0.251152	0.0453199		-0.0536788	0.288503	0.0501146		-0.0327363	0.295591	0.0521472
	-0.00921783	0.24232	0.04375		0.100931	0.251532	0.0456161		-0.0520983	0.290314	0.0504422		-0.0325931	0.295822	0.0524881
	-0.00711919	0.242424	0.0440341		0.102206	0.251544	0.0459123		-0.0516561	0.291303	0.0507697		-0.0323269	0.296515	0.0528289
	-0.00631096	0.242442	0.0443182		0.102237	0.252901	0.0462085		-0.0506516	0.292163	0.0510973		-0.0315761	0.297165	0.0531697
	-0.00585291	0.243575	0.0446023		0.103581	0.253461	0.0465047		-0.0505192	0.29229	0.0514248		-0.0315614	0.297428	0.0535106
	-0.00443055	0.243942	0.0448864		0.105024	0.254272	0.0468009		-0.0483119	0.292385	0.0517524		-0.0306457	0.297748	0.0538514
	-0.00332452	0.244365	0.0451705		0.105534	0.254748	0.0470972		-0.0476659	0.2924	0.0520799		-0.0304919	0.298777	0.0541922
	-0.00199191	0.244405	0.0454545		0.105871	0.254846	0.0473934		-0.0474617	0.292559	0.0524075		-0.0304835	0.299524	0.0545331
	-0.00124459	0.245636	0.0457386		0.107114	0.255122	0.0476896		-0.0465704	0.292576	0.052735		-0.0298422	0.302347	0.0548739
	-0.00115745	0.24581	0.0460227		0.107417	0.256283	0.0479858		-0.0456348	0.29293	0.0530626		-0.0294154	0.303679	0.0552147
	0.00182603	0.246765	0.0463068		0.107639	0.256702	0.048282		-0.0453535	0.293434	0.0533901		-0.0293132	0.304319	0.0555556
	0.00210843	0.247317	0.0465909		0.109438	0.258427	0.0485782		-0.0440402	0.294873	0.0537177		-0.0291813	0.30446	0.0558964
	0.00622543	0.247549	0.046875		0.109957	0.25843	0.0488744		-0.0427105	0.294908	0.0540452		-0.0291121	0.306102	0.0562372
	0.00891435	0.247728	0.0471591		0.110014	0.258583	0.0491706		-0.0423546	0.295679	0.0543727		-0.0291036	0.307426	0.0565781
	0.00900508	0.248284	0.0474432		0.110864	0.259167	0.0494668		-0.0421004	0.296446	0.0547003		-0.0285597	0.309853	0.0569189
	0.0104286	0.248495	0.0477273		0.112695	0.2609	0.049763		-0.0415801	0.296834	0.0550278		-0.0276986	0.311478	0.0572597
	0.0104757	0.248545	0.0480114		0.113051	0.261021	0.0500592		-0.0411085	0.296947	0.0553554		-0.0273367	0.314928	0.0576005
	0.0107102	0.249849	0.0482955		0.113298	0.262683	0.0503555		-0.040877	0.297174	0.0556829		-0.0271932	0.316036	0.0579414
	0.0127629	0.25009	0.0485795		0.11352	0.263329	0.0506517		-0.0407471	0.297248	0.0560105		-0.0270023	0.3161	0.0582822
	0.0137253	0.250211	0.0488636		0.113542	0.264064	0.0509479		-0.0399274	0.29758	0.056338		-0.0266419	0.316177	0.058623
	0.0144001	0.251216	0.0491477		0.114089	0.264197	0.0512441		-0.0394162	0.29801	0.0566656		-0.026521	0.31765	0.0589639
	0.0167578	0.25172	0.0494318		0.114524	0.26538	0.0515403		-0.0393789	0.298357	0.0569931		-0.0265103	0.318336	0.0593047
	0.0170114	0.254498	0.0497159		0.116279	0.266182	0.0518365		-0.0391206	0.298634	0.0573207		-0.0260116	0.319051	0.0596455
	0.018197	0.255889	0.05		0.116753	0.268216	0.0521327		-0.0382236	0.299293	0.0576482		-0.0258538	0.319276	0.0599864
	0.0185628	0.256026	0.0502841		0.116981	0.269856	0.0524289		-0.037917	0.299812	0.0579758		-0.0250455	0.32036	0.0603272
	0.0200001	0.256652	0.0505682		0.117849	0.270474	0.0527251		-0.0379038	0.300795	0.0583033		-0.0247877	0.320404	0.060668
	0.0200523	0.256746	0.0508523		0.120027	0.270868	0.0530213		-0.037074	0.300954	0.0586309		-0.0243454	0.320544	0.0610089
	0.0204026	0.256837	0.0511364		0.120413	0.271557	0.0533175		-0.0366216	0.301958	0.0589584		-0.0240137	0.322035	0.0613497
	0.0216213	0.257322	0.0514205		0.120501	0.272528	0.0536137		-0.0359555	0.303079	0.0592859		-0.0238922	0.323044	0.0616905
	0.0218857	0.258069	0.0517045		0.120549	0.272559	0.05391		-0.0335048	0.303688	0.0596135		-0.0236142	0.325334	0.0620314
	0.023345	0.259275	0.0519886		0.121127	0.273614	0.0542062		-0.0329856	0.303767	0.059941		-0.0235986	0.325751	0.0623722
	0.0245687	0.259461	0.0522727		0.121131	0.273856	0.0545024		-0.032457	0.30395	0.0602686		-0.0235677	0.326599	0.062713
	0.0254088	0.260262	0.0525568		0.121148	0.273961	0.0547986		-0.0319145	0.304636	0.0605961		-0.0231647	0.327046	0.0630539
	0.0286725	0.260417	0.0528409		0.121202	0.274831	0.0550948		-0.0317544	0.306206	0.0609237		-0.0228893	0.327159	0.0633947
	0.0299992	0.260625	0.053125		0.121656	0.27492	0.055391		-0.0316232	0.306427	0.0612512		-0.0224923	0.328054	0.0637355
	0.0342122	0.260631	0.0534091		0.121782	0.275414	0.0556872		-0.030488	0.30843	0.0615788		-0.0223319	0.329401	0.0640763
	0.0350199	0.260976	0.0536932		0.122675	0.277683	0.0559834		-0.029488	0.308448	0.0619063		-0.0221371	0.330296	0.0644172
	0.035627	0.262161	0.0539773		0.123052	0.277736	0.0562796		-0.0275678	0.308547	0.0622339		-0.0219551	0.330491	0.064758
	0.0358253	0.262199	0.0542614		0.12337	0.278117	0.0565758		-0.024636	0.309002	0.0625614		-0.0217445	0.331753	0.0650988
	0.0364538	0.262499	0.0545455		0.123726	0.278372	0.056872		-0.0241647	0.309134	0.062889		-0.0217149	0.33209	0.0654397
	0.036838	0.262809	0.0548295		0.124164	0.278383	0.0571682		-0.0241146	0.310419	0.0632165		-0.0216758	0.333476	0.0657805
	0.0377209	0.262999	0.0551136		0.124189	0.278753	0.0574645		-0.0211524	0.310604	0.0635441		-0.021627	0.333708	0.0661213
	0.0413052	0.263367	0.0553977		0.124212	0.279048	0.0577607		-0.0198694	0.311557	0.0638716		-0.0215954	0.333919	0.0664622
	0.0413199	0.264046	0.0556818		0.125144	0.279321	0.0580569		-0.0198318	0.311832	0.0641991		-0.021455	0.334647	0.066803
	0.0438865	0.264105	0.0559659		0.125458	0.279909	0.0583531		-0.0193034	0.31311	0.0645267		-0.0214313	0.334941	0.0671438
	0.0455371	0.26518	0.05625		0.127926	0.279955	0.0586493		-0.0182211	0.314314	0.0648542		-0.0214234	0.335072	0.0674847
	0.0465802	0.265499	0.0565341		0.128419	0.280148	0.0589455		-0.0177258	0.314575	0.0651818		-0.0212453	0.336268	0.0678255
	0.0501955	0.266472	0.0568182		0.128652	0.280568	0.0592417		-0.0167479	0.315922	0.0655093		-0.0211885	0.33683	0.0681663
	0.0506368	0.267161	0.0571023		0.128713	0.280901	0.0595379		-0.0160794	0.316484	0.0658369		-0.0209775	0.337487	0.0685072
	0.0510082	0.267699	0.0573864		0.129216	0.281385	0.0598341		-0.0147883	0.317335	0.0661644		-0.0208427	0.337593	0.068848
	0.0531918	0.268313	0.0576705		0.129627	0.282216	0.0601303		-0.0147415	0.318331	0.066492		-0.0206014	0.338713	0.0691888
	0.0537756	0.268537	0.0579545		0.129998	0.283193	0.0604265		-0.0138518	0.318566	0.0668195		-0.0202953	0.34056	0.0695297
	0.0541697	0.268712	0.0582386		0.130357	0.283788	0.0607227		-0.0137648	0.319385	0.0671471		-0.0199163	0.340653	0.0698705
	0.0558991	0.269211	0.0585227		0.130586	0.283846	0.061019		-0.013451	0.320497	0.0674746		-0.0198682	0.341698	0.0702113
	0.0583025	0.27002	0.0588068		0.130781	0.284938	0.0613152		-0.0122411	0.321662	0.0678022		-0.0192195	0.34447	0.0705521
	0.0618576	0.270116	0.0590909		0.132518	0.286784	0.0616114		-0.0114622	0.322435	0.0681297		-0.0190067	0.344807	0.070893
	0.063691	0.270735	0.059375		0.132735	0.286934	0.0619076		-0.0111509	0.322775	0.0684573		-0.018588	0.345474	0.0712338
	0.0650975	0.271657	0.0596591		0.133062	0.287245	0.0622038		-0.00818178	0.322884	0.0687848		-0.0180049	0.347491	0.0715746
	0.0658152	0.272115	0.0599432		0.134468	0.288084	0.0625		-0.00547586	0.322986	0.0691123		-0.0179079	0.347934	0.0719155
	0.0658393	0.273237	0.0602273		0.134544	0.288298	0.0627962		-0.00525732	0.325309	0.0694399		-0.0176897	0.348181	0.0722563
	0.066447	0.273349	0.0605114		0.134971	0.288528	0.0630924		-0.00499726	0.325437	0.0697674		-0.0176609	0.349292	0.0725971
	0.0692199	0.274042	0.0607955		0.135116	0.288737	0.0633886		-0.00472069	0.326544	0.070095		-0.0175467	0.349304	0.072938
	0.0708394	0.274284	0.0610795		0.135126	0.28991	0.0636848		-0.00288115	0.326876	0.0704225		-0.0169119	0.349966	0.0732788
	0.0711342	0.274412	0.0613636		0.1352	0.289921	0.063981		-0.00219374	0.328094	0.0707501		-0.0166344	0.350056	0.0736196
	0.0725275	0.276945	0.0616477		0.135495	0.290004	0.0642773		0.000110369	0.328868	0.0710776		-0.0162064	0.350424	0.0739605
	0.0728692	0.278857	0.0619318		0.136065	0.290909	0.0645735		0.00131945	0.330903	0.0714052		-0.01582	0.350784	0.0743013
	0.0753254	0.279295	0.0622159		0.136939	0.291205	0.0648697		0.00133605	0.331027	0.0717327		-0.0155123	0.351732	0.0746421
	0.0762422	0.279374	0.0625		0.137706	0.292192	0.0651659		0.00134276	0.331351	0.0720603		-0.014988	0.351835	0.074983
	0.0771936	0.279426	0.0627841		0.137903	0.292281	0.0654621		0.0023471	0.332208	0.0723878		-0.0148459	0.352366	0.0753238
	0.0786522	0.279454	0.0630682		0.137915	0.292717	0.0657583		0.00337457	0.332869	0.0727154		-0.0137561	0.353315	0.0756646
	0.0794362	0.279669	0.0633523		0.138276	0.293122	0.0660545		0.0037188	0.332972	0.0730429		-0.0134555	0.353418	0.0760055
	0.0818111	0.279807	0.0636364		0.141805	0.293175	0.0663507		0.00408865	0.333237	0.0733705		-0.0133307	0.354646	0.0763463
	0.08192	0.279969	0.0639205		0.143787	0.294069	0.0666469		0.00425049	0.333554	0.073698		-0.0128964	0.35516	0.0766871
	0.0821491	0.280572	0.0642045		0.14422	0.29413	0.0669431		0.00512779	0.333576	0.0740255		-0.0128351	0.355239	0.0770279
	0.084267	0.281581	0.0644886		0.144791	0.29487	0.0672393		0.00710707	0.333822	0.0743531		-0.0127973	0.356701	0.0773688
	0.0843547	0.28212	0.0647727		0.146471	0.29516	0.0675355		0.00883146	0.334217	0.0746806		-0.0126958	0.356702	0.0777096
	0.0852472	0.282252	0.0650568		0.147006	0.29583	0.0678318		0.0104572	0.334712	0.0750082		-0.0122833	0.357379	0.0780504
	0.0854115	0.282387	0.0653409		0.147253	0.296047	0.068128		0.0109603	0.335519	0.0753357		-0.0120257	0.357554	0.0783913
	0.0875511	0.282402	0.065625		0.147724	0.296667	0.0684242		0.0117644	0.335533	0.0756633		-0.0117268	0.358003	0.0787321
	0.0890822	0.282415	0.0659091		0.149154	0.296859	0.0687204		0.0118273	0.335989	0.0759908		-0.0114195	0.359134	0.0790729
	0.0892583	0.282487	0.0661932		0.149774	0.298106	0.0690166		0.0126154	0.336178	0.0763184		-0.0113198	0.35937	0.0794138
	0.0900278	0.282753	0.0664773		0.150881	0.298575	0.0693128		0.0129254	0.336595	0.0766459		-0.0112213	0.360245	0.0797546
	0.0915716	0.282816	0.0667614		0.150947	0.298742	0.069609		0.0130039	0.336701	0.0769735		-0.0108508	0.361024	0.0800954
	0.0925858	0.282997	0.0670455		0.151275	0.298997	0.0699052		0.0136252	0.336739	0.077301		-0.0106006	0.361646	0.0804363
	0.0936728	0.283657	0.0673295		0.152604	0.299445	0.0702014		0.0144821	0.336816	0.0776286		-0.0101018	0.362135	0.0807771
	0.0938111	0.283695	0.0676136		0.152781	0.30138	0.0704976		0.0152009	0.33725	0.0779561		-0.0101018	0.362259	0.0811179
	0.0940587	0.284045	0.0678977		0.153944	0.301804	0.0707938		0.01591	0.337459	0.0782837		-0.0100024	0.362396	0.0814588
	0.0942659	0.284456	0.0681818		0.154087	0.30204	0.07109		0.0163552	0.337588	0.0786112		-0.00993908	0.36388	0.0817996
	0.0946699	0.285845	0.0684659		0.155309	0.302505	0.0713863		0.0185588	0.337675	0.0789387		-0.00964075	0.365513	0.0821404
	0.0947957	0.288125	0.06875		0.156017	0.30267	0.0716825		0.0190897	0.338546	0.0792663		-0.00914406	0.365519	0.0824813
	0.0948284	0.288196	0.0690341		0.157074	0.303677	0.0719787		0.0198441	0.338927	0.0795938		-0.00892804	0.366581	0.0828221
	0.0975124	0.288294	0.0693182		0.157445	0.303855	0.0722749		0.0199933	0.339712	0.0799214		-0.0088246	0.367431	0.0831629
	0.0985511	0.288605	0.0696023		0.157772	0.30389	0.0725711		0.0221701	0.340262	0.0802489		-0.00803045	0.3676	0.0835037
	0.100919	0.288837	0.0698864		0.161048	0.304474	0.0728673		0.0226853	0.343708	0.0805765		-0.00799747	0.367885	0.0838446
	0.10151	0.289288	0.0701705		0.161266	0.304704	0.0731635		0.0231768	0.343917	0.080904		-0.00701586	0.368221	0.0841854
	0.102454	0.289549	0.0704545		0.162519	0.304784	0.0734597		0.0237859	0.344039	0.0812316		-0.00691089	0.368355	0.0845262
	0.103283	0.289583	0.0707386		0.165449	0.305002	0.0737559		0.0241412	0.344652	0.0815591		-0.00688274	0.368425	0.0848671
	0.103399	0.289838	0.0710227		0.166053	0.30569	0.0740521		0.0249771	0.346373	0.0818867		-0.00684666	0.368904	0.0852079
	0.103885	0.290162	0.0713068		0.166204	0.30621	0.0743483		0.0253628	0.346744	0.0822142		-0.00676756	0.369021	0.0855487
	0.106287	0.290725	0.0715909		0.167255	0.306407	0.0746445		0.0254188	0.346886	0.0825418		-0.00667813	0.369724	0.0858896
	0.106811	0.291069	0.071875		0.167278	0.306672	0.0749408		0.0269691	0.347432	0.0828693		-0.00662995	0.371695	0.0862304
	0.106954	0.291334	0.0721591		0.16858	0.306742	0.075237		0.0277245	0.34749	0.0831969		-0.00660484	0.371889	0.0865712
	0.107475	0.292457	0.0724432		0.168615	0.306831	0.0755332		0.0280151	0.349922	0.0835244		-0.00643427	0.372063	0.0869121
	0.108997	0.293308	0.0727273		0.169341	0.30687	0.0758294		0.028833	0.350827	0.0838519		-0.00633897	0.372363	0.0872529
	0.110354	0.295232	0.0730114		0.169882	0.307504	0.0761256		0.0288868	0.351002	0.0841795		-0.00619785	0.372678	0.0875937
	0.110777	0.295242	0.0732955		0.169997	0.307506	0.0764218		0.028937	0.353937	0.084507		-0.00587096	0.37334	0.0879346
	0.111655	0.296062	0.0735795		0.170319	0.307886	0.076718		0.0303845	0.35513	0.0848346		-0.0058456	0.373504	0.0882754
	0.113432	0.296159	0.0738636		0.170575	0.307973	0.0770142		0.0314084	0.355569	0.0851621		-0.00571725	0.373849	0.0886162
	0.115735	0.296237	0.0741477		0.171108	0.308305	0.0773104		0.0318691	0.356938	0.0854897		-0.00534924	0.374707	0.0889571
	0.115837	0.296325	0.0744318		0.171667	0.308825	0.0776066		0.0320178	0.356945	0.0858172		-0.00503144	0.374853	0.0892979
	0.11838	0.296575	0.0747159		0.172068	0.309037	0.0779028		0.032504	0.357788	0.0861448		-0.00404137	0.375201	0.0896387
	0.119736	0.297523	0.075		0.173101	0.309493	0.0781991		0.032687	0.357796	0.0864723		-0.0031156	0.375874	0.0899796
	0.120457	0.297671	0.0752841		0.17442	0.309568	0.0784953		0.0336268	0.361286	0.0867999		-0.00292095	0.376161	0.0903204
	0.122446	0.297789	0.0755682		0.17578	0.310037	0.0787915		0.033695	0.361493	0.0871274		-0.00285722	0.376367	0.0906612
	0.1226	0.298213	0.0758523		0.176024	0.310557	0.0790877		0.0338798	0.362338	0.087455		-0.00259708	0.377639	0.091002
	0.124497	0.298353	0.0761364		0.178682	0.31154	0.0793839		0.0340476	0.36248	0.0877825		-0.00250417	0.378123	0.0913429
	0.124907	0.299186	0.0764205		0.179142	0.313243	0.0796801		0.0362213	0.362719	0.0881101		-0.00217338	0.378664	0.0916837
	0.125282	0.299574	0.0767045		0.179542	0.313791	0.0799763		0.0364426	0.363446	0.0884376		-0.00210179	0.378788	0.0920245
	0.126395	0.299663	0.0769886		0.180457	0.314435	0.0802725		0.0370798	0.363585	0.0887651		-0.00133742	0.379385	0.0923654
	0.126808	0.299781	0.0772727		0.181233	0.314956	0.0805687		0.0375364	0.363744	0.0890927		-0.000864254	0.379686	0.0927062
	0.126953	0.30049	0.0775568		0.181396	0.315754	0.0808649		0.0376266	0.36433	0.0894202		-0.000779009	0.380591	0.093047
	0.127075	0.301002	0.0778409		0.181472	0.317531	0.0811611		0.0379592	0.364436	0.0897478		-0.00046984	0.381052	0.0933879
	0.127804	0.301496	0.078125		0.18151	0.317633	0.0814573		0.0385933	0.364474	0.0900753		0.000145946	0.381471	0.0937287
	0.128013	0.301548	0.0784091		0.181614	0.317878	0.0817536		0.0401095	0.365607	0.0904029		0.000451829	0.38313	0.0940695
	0.128254	0.301796	0.0786932		0.181768	0.317914	0.0820498		0.040219	0.365811	0.0907304		0.000481374	0.384326	0.0944104
	0.12869	0.302353	0.0789773		0.182169	0.318486	0.082346		0.0408685	0.365941	0.091058		0.000872689	0.384928	0.0947512
	0.129093	0.302411	0.0792614		0.182171	0.31878	0.0826422		0.041296	0.366531	0.0913855		0.000941079	0.385027	0.095092
	0.130042	0.302735	0.0795455		0.182645	0.318934	0.0829384		0.0416504	0.36731	0.0917131		0.00146161	0.386031	0.0954329
	0.131567	0.302894	0.0798295		0.183349	0.319087	0.0832346		0.0419407	0.367598	0.0920406		0.00159072	0.386115	0.0957737
	0.132314	0.30404	0.0801136		0.183468	0.319769	0.0835308		0.0432138	0.367969	0.0923682		0.00191003	0.386933	0.0961145
	0.132438	0.304069	0.0803977		0.185913	0.320311	0.083827		0.0433365	0.368075	0.0926957		0.00236415	0.387333	0.0964554
	0.133063	0.304783	0.0806818		0.186025	0.320835	0.0841232		0.043442	0.36816	0.0930233		0.00265505	0.387532	0.0967962
	0.133377	0.305515	0.0809659		0.187537	0.321868	0.0844194		0.044209	0.368582	0.0933508		0.0026898	0.387575	0.097137
	0.134143	0.305521	0.08125		0.189497	0.321889	0.0847156		0.0446651	0.368647	0.0936783		0.00304347	0.387643	0.0974778
	0.134173	0.305858	0.0815341		0.1908	0.322107	0.0850118		0.0452338	0.369098	0.0940059		0.00394677	0.388636	0.0978187
	0.136459	0.307043	0.0818182		0.190988	0.322974	0.0853081		0.0454701	0.36918	0.0943334		0.0041289	0.389668	0.0981595
	0.136739	0.307146	0.0821023		0.192186	0.323351	0.0856043		0.0485702	0.369334	0.094661		0.00430684	0.389743	0.0985003
	0.140835	0.307313	0.0823864		0.192306	0.323394	0.0859005		0.0487995	0.370572	0.0949885		0.00437245	0.389903	0.0988412
	0.141366	0.308451	0.0826705		0.192492	0.323577	0.0861967		0.0506541	0.370792	0.0953161		0.00444729	0.391478	0.099182
	0.141415	0.309531	0.0829545		0.19267	0.324091	0.0864929		0.0510988	0.371609	0.0956436		0.00464138	0.392447	0.0995228
	0.141496	0.31041	0.0832386		0.193126	0.325464	0.0867891		0.0518178	0.372069	0.0959712		0.00496083	0.392928	0.0998637
	0.141909	0.310628	0.0835227		0.193273	0.326474	0.0870853		0.0524718	0.372194	0.0962987		0.00530159	0.392979	0.100204
	0.142449	0.310957	0.0838068		0.193528	0.326678	0.0873815		0.0533127	0.372305	0.0966263		0.00579652	0.393158	0.100545
	0.143298	0.31125	0.0840909		0.194595	0.326726	0.0876777		0.054248	0.372494	0.0969538		0.00589987	0.393655	0.100886
	0.14474	0.311677	0.084375		0.195378	0.326801	0.0879739		0.0544302	0.37251	0.0972814		0.00613516	0.394901	0.101227
	0.144782	0.312134	0.0846591		0.195493	0.328178	0.0882701		0.0545577	0.373018	0.0976089		0.00624923	0.395293	0.101568
	0.144806	0.313292	0.0849432		0.195653	0.328302	0.0885664		0.0558515	0.373023	0.0979365		0.00664097	0.395504	0.101909
	0.148044	0.314031	0.0852273		0.19659	0.329925	0.0888626		0.0566297	0.373649	0.098264		0.0070316	0.395522	0.102249
	0.149512	0.314867	0.0855114		0.197731	0.329993	0.0891588		0.0569949	0.373914	0.0985915		0.0073012	0.396002	0.10259
	0.151083	0.316077	0.0857955		0.19788	0.330321	0.089455		0.0573875	0.374096	0.0989191		0.00811474	0.39803	0.102931
	0.151241	0.317038	0.0860795		0.198564	0.331278	0.0897512		0.0574603	0.375051	0.0992466		0.00827964	0.398572	0.103272
	0.15261	0.317846	0.0863636		0.200017	0.331976	0.0900474		0.0575721	0.376137	0.0995742		0.0086393	0.39864	0.103613
	0.152725	0.317871	0.0866477		0.202356	0.332646	0.0903436		0.0576	0.376767	0.0999017		0.0086872	0.39871	0.103954
	0.153085	0.318026	0.0869318		0.202488	0.334523	0.0906398		0.0585033	0.377296	0.100229		0.00962248	0.398774	0.104294
	0.153864	0.318283	0.0872159		0.203149	0.334653	0.090936		0.0589912	0.377911	0.100557		0.00967074	0.399833	0.104635
	0.154819	0.318773	0.0875		0.204481	0.334817	0.0912322		0.0605585	0.378292	0.100884		0.00984503	0.400919	0.104976
	0.155227	0.318979	0.0877841		0.204859	0.334898	0.0915284		0.0611895	0.379828	0.101212		0.0101261	0.400974	0.105317
	0.155694	0.319058	0.0880682		0.205848	0.335499	0.0918246		0.0615171	0.380616	0.101539		0.0101419	0.401354	0.105658
	0.155948	0.319268	0.0883523		0.206194	0.335642	0.0921209		0.0618861	0.380734	0.101867		0.0103358	0.401817	0.105999
	0.156219	0.319381	0.0886364		0.208048	0.337675	0.0924171		0.0623442	0.381002	0.102195		0.0104829	0.402343	0.106339
	0.157266	0.319683	0.0889205		0.208074	0.337877	0.0927133		0.0629014	0.381804	0.102522		0.0105332	0.403538	0.10668
	0.158224	0.320021	0.0892045		0.208377	0.338503	0.0930095		0.0631643	0.381903	0.10285		0.0105513	0.403592	0.107021
	0.159491	0.320226	0.0894886		0.21046	0.339383	0.0933057		0.0653511	0.38332	0.103177		0.0106708	0.404531	0.107362
	0.159542	0.320523	0.0897727		0.210989	0.339434	0.0936019		0.065447	0.384051	0.103505		0.0111085	0.405034	0.107703
	0.160421	0.320653	0.0900568		0.211679	0.33973	0.0938981		0.0672564	0.384671	0.103832		0.011579	0.405123	0.108044
	0.161193	0.32095	0.0903409		0.212703	0.339994	0.0941943		0.0674612	0.384809	0.10416		0.0116286	0.406024	0.108384
	0.161855	0.320973	0.090625		0.213185	0.340652	0.0944905		0.0674632	0.386125	0.104487		0.0116679	0.406085	0.108725
	0.161879	0.321254	0.0909091		0.214577	0.341678	0.0947867		0.0681374	0.386139	0.104815		0.0117519	0.406865	0.109066
	0.162492	0.322787	0.0911932		0.214805	0.341711	0.0950829		0.068176	0.386649	0.105142		0.0118425	0.406991	0.109407
	0.163652	0.322808	0.0914773		0.215324	0.341736	0.0953791		0.0706759	0.386824	0.10547		0.0118426	0.407274	0.109748
	0.164511	0.322878	0.0917614		0.216152	0.341779	0.0956754		0.07104	0.387846	0.105798		0.0120276	0.407335	0.110089
	0.166077	0.323108	0.0920455		0.216583	0.343616	0.0959716		0.071099	0.388684	0.106125		0.0127765	0.409874	0.110429
	0.169186	0.323824	0.0923295		0.217174	0.343797	0.0962678		0.0714891	0.388728	0.106453		0.0136569	0.410682	0.11077
	0.170418	0.323944	0.0926136		0.217478	0.344607	0.096564		0.0717589	0.388914	0.10678		0.0145653	0.412239	0.111111
	0.170667	0.325298	0.0928977		0.217521	0.344851	0.0968602		0.072139	0.390285	0.107108		0.0146695	0.412424	0.111452
	0.170732	0.325366	0.0931818		0.217823	0.345047	0.0971564		0.073208	0.390434	0.107435		0.0149022	0.412909	0.111793
	0.170759	0.326064	0.0934659		0.218309	0.345243	0.0974526		0.0734603	0.391185	0.107763		0.0149251	0.414353	0.112134
	0.171162	0.32682	0.09375		0.220037	0.346422	0.0977488		0.0736669	0.391206	0.10809		0.0149793	0.414861	0.112474
	0.171856	0.327163	0.0940341		0.220146	0.347119	0.098045		0.0738306	0.39154	0.108418		0.0149876	0.415533	0.112815
	0.17189	0.327894	0.0943182		0.221155	0.347198	0.0983412		0.0741886	0.392413	0.108745		0.0153213	0.417275	0.113156
	0.172804	0.327983	0.0946023		0.221936	0.347506	0.0986374		0.0752695	0.392995	0.109073		0.0155277	0.417308	0.113497
	0.174815	0.327992	0.0948864		0.222731	0.347685	0.0989336		0.0769826	0.393106	0.109401		0.0158168	0.418423	0.113838
	0.174836	0.328281	0.0951705		0.223425	0.349479	0.0992299		0.0788755	0.393122	0.109728		0.0162381	0.41925	0.114179
	0.174897	0.328386	0.0954545		0.223437	0.349777	0.0995261		0.0797425	0.393252	0.110056		0.0162842	0.41996	0.114519
	0.175021	0.328798	0.0957386		0.223698	0.350505	0.0998223		0.0799093	0.394661	0.110383		0.0165024	0.420669	0.11486
	0.175471	0.329304	0.0960227		0.223754	0.351051	0.100118		0.0799324	0.394965	0.110711		0.0165891	0.420711	0.115201
	0.176672	0.329499	0.0963068		0.224118	0.351415	0.100415		0.0799707	0.395513	0.111038		0.0166407	0.420938	0.115542
	0.17851	0.3296	0.0965909		0.224606	0.352047	0.100711		0.0807813	0.395524	0.111366		0.0171737	0.42134	0.115883
	0.179896	0.330423	0.096875		0.224787	0.354111	0.101007		0.081007	0.39767	0.111693		0.0176487	0.422493	0.116224
	0.182471	0.330925	0.0971591		0.225041	0.354342	0.101303		0.0812177	0.397687	0.112021		0.018097	0.422565	0.116564
	0.182873	0.331455	0.0974432		0.225057	0.354587	0.1016		0.0817795	0.399838	0.112349		0.0181021	0.422588	0.116905
	0.182959	0.331999	0.0977273		0.225213	0.354945	0.101896		0.0819787	0.400088	0.112676		0.0181921	0.422639	0.117246
	0.183177	0.333095	0.0980114		0.225809	0.355749	0.102192		0.0832064	0.400316	0.113004		0.0182203	0.422694	0.117587
	0.183379	0.334102	0.0982955		0.226762	0.356198	0.102488		0.0834016	0.401392	0.113331		0.0182808	0.423179	0.117928
	0.184316	0.336012	0.0985795		0.227189	0.357122	0.102784		0.0838329	0.401503	0.113659		0.0186017	0.424101	0.118269
	0.18555	0.337555	0.0988636		0.227533	0.357276	0.103081		0.0843566	0.401613	0.113986		0.018673	0.424262	0.118609
	0.185889	0.338299	0.0991477		0.2277	0.357604	0.103377		0.0852626	0.403555	0.114314		0.0187401	0.425447	0.11895
	0.186558	0.339246	0.0994318		0.228773	0.35772	0.103673		0.0874575	0.404039	0.114641		0.0188877	0.425577	0.119291
	0.188591	0.339564	0.0997159		0.229168	0.357929	0.103969		0.0879732	0.40431	0.114969		0.0189734	0.425674	0.119632
	0.189158	0.33993	0.1		0.229967	0.358517	0.104265		0.0892608	0.404734	0.115296		0.0191389	0.425675	0.119973
	0.190371	0.340234	0.100284		0.230017	0.35868	0.104562		0.0894177	0.405422	0.115624		0.0194253	0.425768	0.120314
	0.192204	0.34163	0.100568		0.230387	0.358727	0.104858		0.0904243	0.405916	0.115952		0.0194635	0.426369	0.120654
	0.192773	0.342036	0.100852		0.231871	0.359266	0.105154		0.0927192	0.406413	0.116279		0.0199596	0.427055	0.120995
	0.192806	0.342241	0.101136		0.232573	0.359329	0.10545		0.0935663	0.407004	0.116607		0.0200231	0.427084	0.121336
	0.19352	0.342332	0.10142		0.232669	0.360035	0.105746		0.0939191	0.408457	0.116934		0.0204313	0.42766	0.121677
	0.195021	0.34262	0.101705		0.233234	0.360124	0.106043		0.0953381	0.410785	0.117262		0.0206411	0.427832	0.122018
	0.195029	0.343015	0.101989		0.233868	0.361352	0.106339		0.0960531	0.410813	0.117589		0.0212052	0.427884	0.122359
	0.195309	0.344173	0.102273		0.235209	0.362064	0.106635		0.0963742	0.411444	0.117917		0.0213424	0.430467	0.122699
	0.195766	0.344545	0.102557		0.235883	0.362267	0.106931		0.0965738	0.411755	0.118244		0.0215626	0.430557	0.12304
	0.195846	0.344602	0.102841		0.237009	0.362478	0.107227		0.0965864	0.411914	0.118572		0.0219337	0.431078	0.123381
	0.196241	0.344905	0.103125		0.23758	0.363928	0.107524		0.0973259	0.412201	0.118899		0.0224305	0.431238	0.123722
	0.19647	0.344993	0.103409		0.237979	0.364027	0.10782		0.0983165	0.412435	0.119227		0.0224658	0.431898	0.124063
	0.196927	0.345466	0.103693		0.238119	0.364045	0.108116		0.0987217	0.412437	0.119555		0.0226149	0.432619	0.124404
	0.197463	0.345504	0.103977		0.238197	0.364401	0.108412		0.0992121	0.413335	0.119882		0.022675	0.432791	0.124744
	0.1988	0.345569	0.104261		0.238353	0.365169	0.108709		0.0999989	0.41338	0.12021		0.0229008	0.43321	0.125085
	0.199547	0.345916	0.104545		0.238618	0.365215	0.109005		0.100302	0.413517	0.120537		0.0237176	0.43353	0.125426
	0.201326	0.346152	0.10483		0.23875	0.365215	0.109301		0.100354	0.413544	0.120865		0.0237217	0.433559	0.125767
	0.201434	0.346431	0.105114		0.238941	0.36548	0.109597		0.100574	0.413798	0.121192		0.0237399	0.434086	0.126108
	0.201609	0.347194	0.105398		0.239385	0.36566	0.109893		0.101855	0.41506	0.12152		0.0237399	0.43426	0.126449
	0.204355	0.347518	0.105682		0.239876	0.365937	0.11019		0.102497	0.415067	0.121847		0.0237562	0.434407	0.126789
	0.204641	0.348751	0.105966		0.23997	0.366097	0.110486		0.102737	0.415364	0.122175		0.0237564	0.435617	0.12713
	0.206383	0.348776	0.10625		0.240526	0.366147	0.110782		0.102894	0.41539	0.122502		0.0238573	0.436034	0.127471
	0.207089	0.349131	0.106534		0.241498	0.366219	0.111078		0.102919	0.416957	0.12283		0.023907	0.436246	0.127812
	0.207577	0.349201	0.106818		0.241648	0.366778	0.111374		0.103569	0.417427	0.123158		0.0241607	0.43628	0.128153
	0.209702	0.349373	0.107102		0.242404	0.366899	0.111671		0.103712	0.417455	0.123485		0.0241886	0.437362	0.128494
	0.21125	0.349499	0.107386		0.242438	0.367275	0.111967		0.104767	0.417496	0.123813		0.0242714	0.438733	0.128834
	0.211963	0.350052	0.10767		0.242477	0.36797	0.112263		0.106215	0.417668	0.12414		0.0246526	0.4394	0.129175
	0.21214	0.350943	0.107955		0.243352	0.368316	0.112559		0.106383	0.417798	0.124468		0.024797	0.439784	0.129516
	0.212158	0.351167	0.108239		0.243652	0.368376	0.112855		0.106758	0.417924	0.124795		0.0248345	0.440946	0.129857
	0.212515	0.351542	0.108523		0.243713	0.368705	0.113152		0.107025	0.417997	0.125123		0.024873	0.441085	0.130198
	0.213639	0.351581	0.108807		0.243941	0.368784	0.113448		0.107098	0.41847	0.12545		0.0249631	0.441872	0.130539
	0.214713	0.352644	0.109091		0.244511	0.369095	0.113744		0.1074	0.420031	0.125778		0.0251506	0.442201	0.130879
	0.214825	0.352825	0.109375		0.244925	0.369911	0.11404		0.107461	0.42163	0.126105		0.0253443	0.442677	0.13122
	0.214855	0.353167	0.109659		0.24513	0.370444	0.114336		0.107662	0.422039	0.126433		0.0255579	0.444482	0.131561
	0.215908	0.354142	0.109943		0.245237	0.371163	0.114633		0.108399	0.422803	0.126761		0.0258283	0.446283	0.131902
	0.217619	0.354915	0.110227		0.245981	0.372043	0.114929		0.10901	0.42321	0.127088		0.0259284	0.446771	0.132243
	0.218391	0.355646	0.110511		0.246079	0.372301	0.115225		0.109327	0.424445	0.127416		0.0259992	0.447533	0.132584
	0.219423	0.355756	0.110795		0.246471	0.372499	0.115521		0.109904	0.424647	0.127743		0.0262579	0.447859	0.132924
	0.219428	0.355814	0.11108		0.246988	0.372592	0.115818		0.109935	0.424815	0.128071		0.0262942	0.449863	0.133265
	0.219604	0.35651	0.111364		0.247244	0.372693	0.116114		0.11042	0.424918	0.128398		0.0264746	0.450186	0.133606
	0.219747	0.356628	0.111648		0.247713	0.373481	0.11641		0.111341	0.426111	0.128726		0.026558	0.450624	0.133947
	0.220083	0.357052	0.111932		0.249913	0.374414	0.116706		0.11237	0.426252	0.129053		0.0268454	0.450973	0.134288
	0.220216	0.357666	0.112216		0.251954	0.374415	0.117002		0.112429	0.427173	0.129381		0.0272524	0.451295	0.134628
	0.221298	0.358263	0.1125		0.252516	0.375835	0.117299		0.112635	0.42762	0.129708		0.0274015	0.451692	0.134969
	0.22242	0.358585	0.112784		0.252645	0.376019	0.117595		0.113104	0.428687	0.130036		0.0283999	0.451741	0.13531
	0.223501	0.359122	0.113068		0.252885	0.376179	0.117891		0.113387	0.429198	0.130364		0.028417	0.452056	0.135651
	0.227814	0.359461	0.113352		0.25363	0.376205	0.118187		0.113433	0.429483	0.130691		0.0284562	0.453331	0.135992
	0.228054	0.359809	0.113636		0.254158	0.376242	0.118483		0.113456	0.430507	0.131019		0.0287657	0.454335	0.136333
	0.22843	0.359948	0.11392		0.254491	0.376283	0.11878		0.113641	0.430572	0.131346		0.0288062	0.454523	0.136673
	0.228814	0.361432	0.114205		0.254576	0.377702	0.119076		0.11396	0.430572	0.131674		0.0288475	0.45554	0.137014
	0.22914	0.362204	0.114489		0.254966	0.378415	0.119372		0.114388	0.430774	0.132001		0.0289665	0.455698	0.137355
	0.229165	0.362696	0.114773		0.255436	0.378506	0.119668		0.114487	0.431073	0.132329		0.0290644	0.456529	0.137696
	0.230936	0.36316	0.115057		0.255898	0.378517	0.119964		0.115222	0.431202	0.132656		0.0296633	0.457475	0.138037
	0.231093	0.363507	0.115341		0.256146	0.379007	0.120261		0.11643	0.43138	0.132984		0.0297625	0.458171	0.138378
	0.231484	0.363817	0.115625		0.256363	0.379382	0.120557		0.117056	0.431735	0.133311		0.0297664	0.458436	0.138718
	0.23166	0.364732	0.115909		0.256502	0.379682	0.120853		0.117484	0.431987	0.133639		0.0298036	0.458555	0.139059
	0.231755	0.365769	0.116193		0.256662	0.379915	0.121149		0.117636	0.432141	0.133967		0.0299742	0.458915	0.1394
	0.233039	0.365889	0.116477		0.257457	0.380445	0.121445		0.117923	0.4326	0.134294		0.0301588	0.460528	0.139741
	0.23388	0.366338	0.116761		0.257462	0.38047	0.121742		0.117951	0.432644	0.134622		0.0302117	0.460529	0.140082
	0.234623	0.366833	0.117045		0.257511	0.381035	0.122038		0.11809	0.432791	0.134949		0.0304375	0.460707	0.140423
	0.234663	0.367013	0.11733		0.25767	0.382556	0.122334		0.118387	0.432829	0.135277		0.0305993	0.46129	0.140763
	0.234711	0.368598	0.117614		0.25823	0.382611	0.12263		0.119904	0.434004	0.135604		0.0308747	0.461378	0.141104
	0.235069	0.369005	0.117898		0.259446	0.383333	0.122927		0.120812	0.434864	0.135932		0.0313864	0.462512	0.141445
	0.235356	0.36933	0.118182		0.259686	0.383889	0.123223		0.120997	0.435334	0.136259		0.0316392	0.46292	0.141786
	0.23628	0.369628	0.118466		0.259877	0.384455	0.123519		0.121301	0.436118	0.136587		0.031828	0.463729	0.142127
	0.236329	0.370741	0.11875		0.259995	0.384834	0.123815		0.121343	0.43699	0.136915		0.0321945	0.463803	0.142468
	0.236789	0.370843	0.119034		0.260674	0.385415	0.124111		0.121469	0.437656	0.137242		0.0323246	0.463999	0.142808
	0.237197	0.37162	0.119318		0.261181	0.385423	0.124408		0.121479	0.437912	0.13757		0.0323795	0.464042	0.143149
	0.237306	0.372166	0.119602		0.261444	0.385516	0.124704		0.121482	0.438433	0.137897		0.0325595	0.464052	0.14349
	0.237432	0.372525	0.119886		0.262151	0.385532	0.125		0.121983	0.438826	0.138225		0.0331302	0.464076	0.143831
	0.237641	0.372527	0.12017		0.26272	0.386101	0.125296		0.122102	0.439302	0.138552		0.0334409	0.465319	0.144172
	0.237716	0.372816	0.120455		0.262732	0.386248	0.125592		0.122829	0.439634	0.13888		0.0335285	0.467051	0.144513
	0.237919	0.373521	0.120739		0.263074	0.38625	0.125889		0.123914	0.439649	0.139207		0.0337006	0.467564	0.144853
	0.238655	0.37385	0.121023		0.264304	0.386687	0.126185		0.124091	0.439696	0.139535		0.0340697	0.467637	0.145194
	0.238866	0.374918	0.121307		0.264561	0.386908	0.126481		0.124847	0.440701	0.139862		0.0341869	0.468095	0.145535
	0.239176	0.376217	0.121591		0.264918	0.386925	0.126777		0.125638	0.441602	0.14019		0.0342524	0.468611	0.145876
	0.239813	0.37648	0.121875		0.265148	0.387009	0.127073		0.127197	0.442157	0.140518		0.0342741	0.469693	0.146217
	0.240546	0.378561	0.122159		0.266812	0.387017	0.12737		0.127688	0.442538	0.140845		0.0344974	0.470602	0.146558
	0.241865	0.379416	0.122443		0.2669	0.387103	0.127666		0.127783	0.442581	0.141173		0.034532	0.471033	0.146898
	0.241873	0.380046	0.122727		0.266947	0.387315	0.127962		0.128858	0.443112	0.1415		0.0345476	0.471623	0.147239
	0.242719	0.382023	0.123011		0.268737	0.387678	0.128258		0.129036	0.443315	0.141828		0.0346822	0.471708	0.14758
	0.245395	0.383079	0.123295		0.270371	0.388664	0.128555		0.129036	0.44432	0.142155		0.0346874	0.472198	0.147921
	0.246311	0.383492	0.12358		0.270379	0.388895	0.128851		0.129581	0.444412	0.142483		0.034699	0.473119	0.148262
	0.248737	0.383931	0.123864		0.270421	0.390702	0.129147		0.130514	0.444498	0.14281		0.0347457	0.473384	0.148603
	0.249213	0.384074	0.124148		0.271269	0.390862	0.129443		0.132503	0.44495	0.143138		0.0348061	0.473626	0.148943
	0.249721	0.384331	0.124432		0.271374	0.391111	0.129739		0.133254	0.445218	0.143465		0.0350676	0.47401	0.149284
	0.249752	0.384867	0.124716		0.271639	0.39162	0.130036		0.134293	0.446017	0.143793		0.0350809	0.474094	0.149625
	0.250637	0.385418	0.125		0.271642	0.39167	0.130332		0.135544	0.446107	0.144121		0.0350878	0.475077	0.149966
	0.250912	0.38698	0.125284		0.272355	0.391789	0.130628		0.135872	0.446435	0.144448		0.0351173	0.475327	0.150307
	0.251043	0.386989	0.125568		0.274573	0.391853	0.130924		0.135889	0.448099	0.144776		0.0353096	0.476145	0.150648
	0.251083	0.387033	0.125852		0.274656	0.392075	0.13122		0.136279	0.448239	0.145103		0.03548	0.478079	0.150988
	0.251212	0.388396	0.126136		0.274759	0.392412	0.131517		0.136519	0.449342	0.145431		0.035678	0.478087	0.151329
	0.251496	0.388533	0.12642		0.275515	0.392427	0.131813		0.137672	0.449661	0.145758		0.0357992	0.479468	0.15167
	0.252083	0.38868	0.126705		0.275711	0.392598	0.132109		0.138768	0.450405	0.146086		0.0358036	0.479821	0.152011
	0.25278	0.388907	0.126989		0.275717	0.393687	0.132405		0.138779	0.450595	0.146413		0.0362581	0.480231	0.152352
	0.253744	0.389249	0.127273		0.276083	0.393699	0.132701		0.138803	0.451121	0.146741		0.036298	0.481392	0.152693
	0.253915	0.389368	0.127557		0.276249	0.393838	0.132998		0.139493	0.451848	0.147068		0.0366094	0.481979	0.153033
	0.254778	0.389483	0.127841		0.276621	0.394003	0.133294		0.139789	0.452377	0.147396		0.0369798	0.482346	0.153374
	0.255492	0.389569	0.128125		0.27694	0.394502	0.13359		0.139904	0.452426	0.147724		0.0372034	0.483189	0.153715
	0.255792	0.389634	0.128409		0.277289	0.395119	0.133886		0.140769	0.45252	0.148051		0.0373056	0.483344	0.154056
	0.256364	0.390373	0.128693		0.278939	0.39541	0.134182		0.14211	0.453369	0.148379		0.0376082	0.48361	0.154397
	0.256804	0.39207	0.128977		0.278982	0.395854	0.134479		0.142695	0.454053	0.148706		0.037834	0.483855	0.154738
	0.257359	0.392604	0.129261		0.278982	0.396403	0.134775		0.143343	0.454789	0.149034		0.0380237	0.484276	0.155078
	0.257867	0.392626	0.129545		0.279225	0.396464	0.135071		0.144255	0.455309	0.149361		0.0381078	0.48434	0.155419
	0.258191	0.393812	0.12983		0.279562	0.397381	0.135367		0.144388	0.455577	0.149689		0.0381626	0.484453	0.15576
	0.258809	0.394779	0.130114		0.279703	0.398039	0.135664		0.14475	0.457025	0.150016		0.0384494	0.485231	0.156101
	0.258824	0.396677	0.130398		0.283147	0.398271	0.13596		0.145072	0.457223	0.150344		0.0384977	0.486266	0.156442
	0.259137	0.396993	0.130682		0.284676	0.398705	0.136256		0.145105	0.457592	0.150671		0.0385253	0.48676	0.156783
	0.259591	0.397219	0.130966		0.284907	0.398992	0.136552		0.146982	0.457883	0.150999		0.0386098	0.488682	0.157123
	0.260126	0.398263	0.13125		0.285455	0.399372	0.136848		0.147462	0.458937	0.151327		0.039175	0.488748	0.157464
	0.261184	0.398444	0.131534		0.285509	0.400679	0.137145		0.147497	0.459001	0.151654		0.0392917	0.489229	0.157805
	0.261242	0.398525	0.131818		0.285548	0.401381	0.137441		0.147615	0.460184	0.151982		0.039362	0.489594	0.158146
	0.262291	0.398795	0.132102		0.28607	0.401615	0.137737		0.147979	0.461292	0.152309		0.0394711	0.489834	0.158487
	0.263811	0.399304	0.132386		0.28679	0.402421	0.138033		0.148803	0.461615	0.152637		0.0394888	0.492279	0.158828
	0.26408	0.399425	0.13267		0.286807	0.403226	0.138329		0.149428	0.46164	0.152964		0.0395134	0.49233	0.159168
	0.265976	0.400403	0.132955		0.286971	0.403966	0.138626		0.149482	0.461823	0.153292		0.0396015	0.493024	0.159509
	0.266013	0.400415	0.133239		0.287628	0.404011	0.138922		0.149507	0.462278	0.153619		0.0396661	0.493581	0.15985
	0.266593	0.400446	0.133523		0.288707	0.405052	0.139218		0.149824	0.462616	0.153947		0.0400442	0.494051	0.160191
	0.267919	0.400738	0.133807		0.288766	0.405887	0.139514		0.149901	0.462656	0.154274		0.0403969	0.494225	0.160532
	0.26816	0.401211	0.134091		0.289195	0.406004	0.13981		0.150589	0.462696	0.154602		0.0404244	0.494226	0.160873
	0.26816	0.401723	0.134375		0.289226	0.40605	0.140107		0.15119	0.462846	0.15493		0.040799	0.494426	0.161213
	0.268264	0.401889	0.134659		0.289293	0.407092	0.140403		0.151586	0.46363	0.155257		0.0410467	0.494462	0.161554
	0.268977	0.401915	0.134943		0.290279	0.407859	0.140699		0.152103	0.46448	0.155585		0.0412566	0.494727	0.161895
	0.269674	0.401943	0.135227		0.292631	0.409736	0.140995		0.152891	0.46477	0.155912		0.0418391	0.496157	0.162236
	0.271145	0.402105	0.135511		0.294287	0.410273	0.141291		0.154776	0.465298	0.15624		0.0419359	0.496679	0.162577
	0.271267	0.40223	0.135795		0.294402	0.411681	0.141588		0.155536	0.46566	0.156567		0.0419868	0.497115	0.162918
	0.271273	0.402248	0.13608		0.295097	0.412057	0.141884		0.155967	0.466008	0.156895		0.0419993	0.497291	0.163258
	0.271587	0.402993	0.136364		0.295909	0.412126	0.14218		0.156702	0.466586	0.157222		0.0421259	0.497297	0.163599
	0.272517	0.40352	0.136648		0.29596	0.412417	0.142476		0.156985	0.467284	0.15755		0.0421906	0.497421	0.16394
	0.27389	0.404322	0.136932		0.296224	0.412628	0.142773		0.157045	0.467439	0.157877		0.0422175	0.497791	0.164281
	0.275206	0.404609	0.137216		0.296459	0.412681	0.143069		0.157108	0.468378	0.158205		0.0426016	0.498463	0.164622
	0.275339	0.404647	0.1375		0.296894	0.412915	0.143365		0.157397	0.469452	0.158533		0.0426916	0.49895	0.164963
	0.27567	0.405193	0.137784		0.298409	0.413089	0.143661		0.158863	0.469541	0.15886		0.0427056	0.499778	0.165303
	0.276116	0.40569	0.138068		0.298487	0.413179	0.143957		0.160092	0.46975	0.159188		0.0427502	0.499841	0.165644
	0.276995	0.406059	0.138352		0.298564	0.413536	0.144254		0.160324	0.470444	0.159515		0.0431114	0.500796	0.165985
	0.277543	0.406474	0.138636		0.2988	0.41432	0.14455		0.160851	0.470862	0.159843		0.0434518	0.501316	0.166326
	0.277591	0.406894	0.13892		0.299443	0.415845	0.144846		0.160891	0.470942	0.16017		0.0435507	0.50177	0.166667
	0.278946	0.407156	0.139205		0.299529	0.416248	0.145142		0.160911	0.471059	0.160498		0.0438882	0.501874	0.167007
	0.279641	0.407915	0.139489		0.299705	0.417055	0.145438		0.161725	0.471304	0.160825		0.0439421	0.502265	0.167348
	0.279818	0.407945	0.139773		0.300006	0.417188	0.145735		0.16222	0.472138	0.161153		0.043982	0.503739	0.167689
	0.279909	0.408239	0.140057		0.300405	0.417212	0.146031		0.162361	0.473381	0.161481		0.0443817	0.503918	0.16803
	0.281074	0.408576	0.140341		0.300712	0.417277	0.146327		0.162539	0.47363	0.161808		0.0444186	0.50521	0.168371
	0.282528	0.409143	0.140625		0.301721	0.418304	0.146623		0.162547	0.47396	0.162136		0.0444285	0.505219	0.168712
	0.28319	0.409477	0.140909		0.302252	0.418414	0.146919		0.162642	0.474091	0.162463		0.0445923	0.505811	0.169052
	0.283378	0.409554	0.141193		0.302686	0.418697	0.147216		0.163136	0.474128	0.162791		0.0448421	0.506287	0.169393
	0.284463	0.409624	0.141477		0.303028	0.419082	0.147512		0.16317	0.474544	0.163118		0.0450965	0.506818	0.169734
	0.284934	0.410261	0.141761		0.303135	0.419233	0.147808		0.163843	0.475134	0.163446		0.0452739	0.507228	0.170075
	0.286011	0.411116	0.142045		0.303502	0.420384	0.148104		0.16436	0.475159	0.163773		0.0454026	0.508011	0.170416
	0.286205	0.411891	0.14233		0.303571	0.420518	0.1484		0.165307	0.475781	0.164101		0.0456485	0.508505	0.170757
	0.28925	0.412029	0.142614		0.304437	0.420582	0.148697		0.166998	0.475959	0.164428		0.0457445	0.50978	0.171097
	0.291078	0.412613	0.142898		0.304646	0.420985	0.148993		0.167859	0.475976	0.164756		0.0461734	0.509801	0.171438
	0.291584	0.41398	0.143182		0.305474	0.421833	0.149289		0.169697	0.476461	0.165084		0.0462089	0.509921	0.171779
	0.291786	0.414129	0.143466		0.305927	0.421917	0.149585		0.169788	0.477264	0.165411		0.0464628	0.509925	0.17212
	0.29227	0.414208	0.14375		0.307857	0.422693	0.149882		0.169816	0.477304	0.165739		0.0465451	0.511017	0.172461
	0.292691	0.415243	0.144034		0.30843	0.423508	0.150178		0.169875	0.478186	0.166066		0.0465648	0.511112	0.172802
	0.292926	0.415569	0.144318		0.308446	0.423702	0.150474		0.170044	0.480248	0.166394		0.046765	0.511276	0.173142
	0.293035	0.415734	0.144602		0.308487	0.423921	0.15077		0.170116	0.480408	0.166721		0.0472964	0.512304	0.173483
	0.293062	0.415975	0.144886		0.30915	0.424409	0.151066		0.170305	0.480455	0.167049		0.047581	0.513254	0.173824
	0.293235	0.416334	0.14517		0.30937	0.424947	0.151363		0.170396	0.480496	0.167376		0.0475996	0.51444	0.174165
	0.293749	0.416642	0.145455		0.310717	0.425553	0.151659		0.170637	0.480559	0.167704		0.0476696	0.515216	0.174506
	0.294693	0.416741	0.145739		0.311729	0.42622	0.151955		0.171228	0.480609	0.168031		0.0476998	0.515596	0.174847
	0.295704	0.41686	0.146023		0.312382	0.427559	0.152251		0.171301	0.480702	0.168359		0.0480992	0.516259	0.175187
	0.295936	0.416915	0.146307		0.313541	0.427683	0.152547		0.172146	0.481785	0.168687		0.0483541	0.517007	0.175528
	0.296048	0.417772	0.146591		0.31418	0.427997	0.152844		0.173296	0.48189	0.169014		0.0484858	0.517924	0.175869
	0.296454	0.417971	0.146875		0.314247	0.428465	0.15314		0.174008	0.482156	0.169342		0.0485402	0.519713	0.17621
	0.296705	0.418018	0.147159		0.315536	0.428903	0.153436		0.175009	0.482211	0.169669		0.0486236	0.519923	0.176551
	0.298041	0.418148	0.147443		0.315582	0.429488	0.153732		0.17521	0.482608	0.169997		0.0487028	0.519979	0.176892
	0.301034	0.418225	0.147727		0.316	0.429644	0.154028		0.175241	0.483613	0.170324		0.0488686	0.520131	0.177232
	0.302326	0.418765	0.148011		0.317374	0.429925	0.154325		0.176123	0.483645	0.170652		0.0490483	0.520183	0.177573
	0.302661	0.419069	0.148295		0.319183	0.429987	0.154621		0.176733	0.483728	0.170979		0.0491368	0.521233	0.177914
	0.304571	0.419302	0.14858		0.319492	0.430819	0.154917		0.176871	0.483799	0.171307		0.0492713	0.522175	0.178255
	0.306049	0.419775	0.148864		0.319969	0.430884	0.155213		0.177653	0.484079	0.171634		0.0495117	0.522697	0.178596
	0.306724	0.419952	0.149148		0.32063	0.4311	0.155509		0.177738	0.484541	0.171962		0.0496544	0.522779	0.178937
	0.307242	0.420131	0.149432		0.320634	0.432785	0.155806		0.178487	0.484633	0.17229		0.0498309	0.523058	0.179277
	0.307657	0.420461	0.149716		0.321001	0.432861	0.156102		0.178682	0.485103	0.172617		0.0500924	0.523315	0.179618
	0.307766	0.421029	0.15		0.321096	0.432955	0.156398		0.179156	0.485311	0.172945		0.0501162	0.524195	0.179959
	0.30838	0.421486	0.150284		0.321507	0.433975	0.156694		0.179719	0.485859	0.173272		0.0502168	0.524217	0.1803
	0.309173	0.422099	0.150568		0.321717	0.434337	0.156991		0.179925	0.485934	0.1736		0.0502181	0.524523	0.180641
	0.309309	0.422721	0.150852		0.321727	0.434735	0.157287		0.180526	0.486232	0.173927		0.0502249	0.524557	0.180982
	0.309828	0.422966	0.151136		0.321755	0.43495	0.157583		0.180888	0.488105	0.174255		0.0503591	0.524882	0.181322
	0.310742	0.423001	0.15142		0.321806	0.435326	0.157879		0.181081	0.488704	0.174582		0.0505528	0.524925	0.181663
	0.310753	0.423804	0.151705		0.322107	0.436122	0.158175		0.181094	0.489333	0.17491		0.0505879	0.525206	0.182004
	0.310833	0.424061	0.151989		0.322904	0.436435	0.158472		0.181108	0.489417	0.175237		0.0506124	0.525606	0.182345
	0.311266	0.424084	0.152273		0.323619	0.436473	0.158768		0.181234	0.490516	0.175565		0.0510109	0.526521	0.182686
	0.311947	0.424939	0.152557		0.324179	0.436525	0.159064		0.181821	0.490859	0.175893		0.0510555	0.526789	0.183027
	0.312383	0.425134	0.152841		0.324287	0.437333	0.15936		0.181903	0.491106	0.17622		0.0512577	0.527105	0.183367
	0.313147	0.425666	0.153125		0.325641	0.438006	0.159656		0.182331	0.491106	0.176548		0.0512799	0.527245	0.183708
	0.314488	0.425812	0.153409		0.325991	0.438045	0.159953		0.18251	0.49115	0.176875		0.0512934	0.527934	0.184049
	0.31485	0.42582	0.153693		0.327077	0.43933	0.160249		0.183262	0.491331	0.177203		0.0514108	0.528117	0.18439
	0.314988	0.426544	0.153977		0.327106	0.440636	0.160545		0.183348	0.492296	0.17753		0.0516732	0.528235	0.184731
	0.315112	0.427905	0.154261		0.327253	0.44135	0.160841		0.183492	0.492902	0.177858		0.0518402	0.529148	0.185072
	0.315125	0.4287	0.154545		0.327946	0.441432	0.161137		0.183602	0.493062	0.178185		0.0518482	0.530596	0.185412
	0.316026	0.4289	0.15483		0.328368	0.441517	0.161434		0.184161	0.494495	0.178513		0.0518576	0.530912	0.185753
	0.316153	0.430429	0.155114		0.32934	0.443707	0.16173		0.184523	0.494505	0.17884		0.0523036	0.531671	0.186094
	0.316266	0.430558	0.155398		0.329704	0.444229	0.162026		0.185048	0.495591	0.179168		0.0524658	0.531716	0.186435
	0.319297	0.430627	0.155682		0.330874	0.444714	0.162322		0.186023	0.495762	0.179496		0.0525254	0.532442	0.186776
	0.319632	0.431481	0.155966		0.331676	0.445184	0.162618		0.187182	0.496078	0.179823		0.052743	0.532932	0.187117
	0.320335	0.431521	0.15625		0.332112	0.445473	0.162915		0.187744	0.496155	0.180151		0.0527907	0.532972	0.187457
	0.320399	0.432361	0.156534		0.332732	0.44557	0.163211		0.188031	0.49668	0.180478		0.0531567	0.533613	0.187798
	0.320852	0.432665	0.156818		0.333898	0.445964	0.163507		0.188071	0.496789	0.180806		0.0534693	0.534123	0.188139
	0.320858	0.433741	0.157102		0.334644	0.448364	0.163803		0.18891	0.497226	0.181133		0.0534815	0.534137	0.18848
	0.321254	0.434455	0.157386		0.336901	0.448463	0.1641		0.188994	0.497611	0.181461		0.0536091	0.534554	0.188821
	0.321728	0.434866	0.15767		0.337658	0.448625	0.164396		0.18949	0.497664	0.181788		0.0536224	0.534649	0.189162
	0.32216	0.435159	0.157955		0.338131	0.450222	0.164692		0.189628	0.497674	0.182116		0.053769	0.535746	0.189502
	0.324424	0.436137	0.158239		0.339243	0.450734	0.164988		0.191098	0.498008	0.182443		0.0538179	0.536092	0.189843
	0.325146	0.437939	0.158523		0.339826	0.450753	0.165284		0.19134	0.498271	0.182771		0.0539036	0.53629	0.190184
	0.325395	0.438059	0.158807		0.340805	0.450967	0.165581		0.191508	0.498445	0.183099		0.0540473	0.536921	0.190525
	0.325478	0.438235	0.159091		0.34177	0.452407	0.165877		0.191615	0.498655	0.183426		0.0542467	0.537764	0.190866
	0.326025	0.438235	0.159375		0.342094	0.453318	0.166173		0.192204	0.499242	0.183754		0.0544267	0.537805	0.191207
	0.326761	0.438327	0.159659		0.34244	0.453322	0.166469		0.192494	0.499509	0.184081		0.0545194	0.537949	0.191547
	0.32792	0.438382	0.159943		0.342798	0.454204	0.166765		0.192516	0.49969	0.184409		0.0549741	0.540322	0.191888
	0.328293	0.438465	0.160227		0.342974	0.454896	0.167062		0.193368	0.500847	0.184736		0.05514	0.540834	0.192229
	0.328476	0.438523	0.160511		0.343314	0.455353	0.167358		0.194198	0.502499	0.185064		0.0553198	0.543471	0.19257
	0.329501	0.438529	0.160795		0.345129	0.45551	0.167654		0.194252	0.502783	0.185391		0.0554005	0.544077	0.192911
	0.329584	0.438901	0.16108		0.345558	0.455514	0.16795		0.194522	0.503688	0.185719		0.055965	0.544971	0.193252
	0.32966	0.439242	0.161364		0.348533	0.455631	0.168246		0.196014	0.505622	0.186047		0.0560076	0.545642	0.193592
	0.32986	0.439459	0.161648		0.348921	0.45567	0.168543		0.198284	0.505742	0.186374		0.056424	0.54583	0.193933
	0.330164	0.439554	0.161932		0.349195	0.456128	0.168839		0.198463	0.50582	0.186702		0.0567084	0.546973	0.194274
	0.330916	0.440049	0.162216		0.349362	0.456387	0.169135		0.198512	0.508192	0.187029		0.0567204	0.548821	0.194615
	0.33123	0.440224	0.1625		0.349434	0.456518	0.169431		0.198904	0.508594	0.187357		0.0568002	0.549044	0.194956
	0.331268	0.44029	0.162784		0.349586	0.456769	0.169727		0.198982	0.509048	0.187684		0.056937	0.549893	0.195297
	0.331597	0.440648	0.163068		0.350193	0.456891	0.170024		0.199048	0.509052	0.188012		0.0572415	0.550992	0.195637
	0.331856	0.440933	0.163352		0.350877	0.458112	0.17032		0.200583	0.509336	0.188339		0.0575338	0.552432	0.195978
	0.333262	0.441068	0.163636		0.351117	0.458168	0.170616		0.200593	0.509437	0.188667		0.0575874	0.552459	0.196319
	0.33341	0.44125	0.16392		0.351241	0.458239	0.170912		0.201461	0.510585	0.188994		0.0576339	0.555547	0.19666
	0.333809	0.441529	0.164205		0.351517	0.458513	0.171209		0.201584	0.510638	0.189322		0.0579269	0.555592	0.197001
	0.333873	0.441566	0.164489		0.351631	0.460113	0.171505		0.202025	0.511365	0.18965		0.0579513	0.555827	0.197342
	0.334667	0.442509	0.164773		0.351638	0.460533	0.171801		0.202109	0.511681	0.189977		0.0579843	0.555849	0.197682
	0.33494	0.442928	0.165057		0.351759	0.461007	0.172097		0.202645	0.511732	0.190305		0.0583407	0.556099	0.198023
	0.335173	0.443257	0.165341		0.352043	0.462195	0.172393		0.202724	0.513081	0.190632		0.0585155	0.556174	0.198364
	0.335436	0.4433	0.165625		0.352106	0.462571	0.17269		0.203372	0.513467	0.19096		0.0587452	0.556267	0.198705
	0.335439	0.443311	0.165909		0.352346	0.462647	0.172986		0.20386	0.514454	0.191287		0.059008	0.557262	0.199046
	0.335774	0.44392	0.166193		0.353167	0.463812	0.173282		0.204055	0.515343	0.191615		0.05931	0.557409	0.199387
	0.336183	0.445161	0.166477		0.353501	0.463957	0.173578		0.204757	0.516071	0.191942		0.0595477	0.557554	0.199727
	0.336489	0.445213	0.166761		0.35353	0.464299	0.173874		0.204933	0.516728	0.19227		0.0596016	0.558065	0.200068
	0.336831	0.445362	0.167045		0.354649	0.464299	0.174171		0.205282	0.516892	0.192597		0.0605409	0.558139	0.200409
	0.337584	0.445421	0.16733		0.354907	0.464384	0.174467		0.205498	0.517604	0.192925		0.0605602	0.558324	0.20075
	0.337869	0.445508	0.167614		0.354943	0.464443	0.174763		0.205517	0.517697	0.193253		0.0606672	0.559116	0.201091
	0.338273	0.446882	0.167898		0.355122	0.464827	0.175059		0.206043	0.519395	0.19358		0.0606742	0.559131	0.201431
	0.338669	0.447283	0.168182		0.355658	0.465175	0.175355		0.20662	0.519775	0.193908		0.061239	0.559446	0.201772
	0.3389	0.447556	0.168466		0.355793	0.466021	0.175652		0.206853	0.519888	0.194235		0.0613851	0.560219	0.202113
	0.339072	0.449461	0.16875		0.355949	0.466292	0.175948		0.207195	0.520134	0.194563		0.0614446	0.560516	0.202454
	0.3406	0.450263	0.169034		0.356857	0.466771	0.176244		0.208142	0.520176	0.19489		0.0614497	0.560791	0.202795
	0.340751	0.450739	0.169318		0.356873	0.466921	0.17654		0.208503	0.520288	0.195218		0.0615501	0.561018	0.203136
	0.341292	0.451069	0.169602		0.357019	0.467713	0.176836		0.208677	0.520422	0.195545		0.0619518	0.56137	0.203476
	0.341569	0.451412	0.169886		0.357112	0.468509	0.177133		0.209334	0.520832	0.195873		0.0620079	0.56173	0.203817
	0.341889	0.451705	0.17017		0.357114	0.468619	0.177429		0.21001	0.521121	0.1962		0.0620836	0.56206	0.204158
	0.342664	0.451718	0.170455		0.357155	0.469114	0.177725		0.210125	0.521303	0.196528		0.0623334	0.562847	0.204499
	0.34614	0.453389	0.170739		0.358159	0.469825	0.178021		0.210481	0.521676	0.196856		0.0623548	0.563457	0.20484
	0.346705	0.453621	0.171023		0.358256	0.470415	0.178318		0.21107	0.522749	0.197183		0.0626068	0.565951	0.205181
	0.346778	0.453745	0.171307		0.360406	0.470906	0.178614		0.212212	0.524021	0.197511		0.0626265	0.566103	0.205521
	0.347318	0.453831	0.171591		0.360513	0.471199	0.17891		0.213464	0.524401	0.197838		0.062856	0.566959	0.205862
	0.347377	0.453841	0.171875		0.361038	0.471724	0.179206		0.21443	0.524458	0.198166		0.0629167	0.567935	0.206203
	0.348014	0.454039	0.172159		0.361248	0.471864	0.179502		0.214823	0.524501	0.198493		0.0629381	0.56802	0.206544
	0.348384	0.454084	0.172443		0.361776	0.472422	0.179799		0.215588	0.524508	0.198821		0.062977	0.569954	0.206885
	0.348459	0.454631	0.172727		0.361956	0.473842	0.180095		0.216236	0.525826	0.199148		0.0630203	0.5714	0.207226
	0.349181	0.454634	0.173011		0.362647	0.47404	0.180391		0.2172	0.526233	0.199476		0.0630348	0.571585	0.207566
	0.350147	0.455407	0.173295		0.364317	0.474122	0.180687		0.218363	0.526778	0.199803		0.0632318	0.571787	0.207907
	0.350426	0.45676	0.17358		0.364512	0.474538	0.180983		0.218521	0.527811	0.200131		0.0633034	0.572363	0.208248
	0.351061	0.456788	0.173864		0.366225	0.474557	0.18128		0.219138	0.528124	0.200459		0.0633375	0.572888	0.208589
	0.351412	0.456992	0.174148		0.366274	0.474974	0.181576		0.219172	0.52847	0.200786		0.0634487	0.57426	0.20893
	0.352163	0.457081	0.174432		0.366286	0.475565	0.181872		0.219596	0.528723	0.201114		0.0634651	0.574367	0.209271
	0.352244	0.457092	0.174716		0.366422	0.475567	0.182168		0.219968	0.529562	0.201441		0.0639777	0.575563	0.209611
	0.352626	0.457407	0.175		0.368293	0.475762	0.182464		0.220347	0.529617	0.201769		0.0639886	0.575577	0.209952
	0.353144	0.457954	0.175284		0.369502	0.476481	0.182761		0.221378	0.529791	0.202096		0.0641828	0.575692	0.210293
	0.354138	0.459175	0.175568		0.369961	0.476628	0.183057		0.221387	0.530868	0.202424		0.0644164	0.576506	0.210634
	0.354905	0.460362	0.175852		0.370349	0.476697	0.183353		0.221822	0.531494	0.202751		0.0645721	0.576962	0.210975
	0.355572	0.460526	0.176136		0.371354	0.477384	0.183649		0.222002	0.531578	0.203079		0.0648028	0.577065	0.211316
	0.355924	0.460735	0.17642		0.371373	0.47782	0.183945		0.222315	0.531681	0.203406		0.0648436	0.577221	0.211656
	0.355982	0.461211	0.176705		0.371839	0.478255	0.184242		0.22286	0.533132	0.203734		0.0654292	0.57785	0.211997
	0.356185	0.462023	0.176989		0.372478	0.478872	0.184538		0.223674	0.534211	0.204062		0.065454	0.578641	0.212338
	0.356286	0.462956	0.177273		0.37269	0.479208	0.184834		0.223712	0.534427	0.204389		0.0661848	0.578804	0.212679
	0.356321	0.46327	0.177557		0.373282	0.479339	0.18513		0.223775	0.534797	0.204717		0.0663059	0.579749	0.21302
	0.356538	0.463408	0.177841		0.374527	0.479676	0.185427		0.226328	0.53493	0.205044		0.0664746	0.580027	0.213361
	0.356822	0.463637	0.178125		0.374606	0.479785	0.185723		0.227537	0.535519	0.205372		0.0664806	0.580209	0.213701
	0.358403	0.464489	0.178409		0.374654	0.480077	0.186019		0.227862	0.535684	0.205699		0.0665521	0.580667	0.214042
	0.359343	0.464787	0.178693		0.374772	0.480309	0.186315		0.227898	0.536156	0.206027		0.0665979	0.580841	0.214383
	0.360434	0.464887	0.178977		0.375501	0.480642	0.186611		0.228395	0.536647	0.206354		0.0667136	0.582009	0.214724
	0.360946	0.465017	0.179261		0.37613	0.481018	0.186908		0.228464	0.53674	0.206682		0.0669424	0.583251	0.215065
	0.361891	0.465123	0.179545		0.379429	0.481352	0.187204		0.228522	0.537536	0.207009		0.0669696	0.584185	0.215406
	0.362814	0.465209	0.17983		0.379834	0.482751	0.1875		0.230766	0.537897	0.207337		0.0670132	0.58465	0.215746
	0.362819	0.465372	0.180114		0.380024	0.484126	0.187796		0.231381	0.537923	0.207665		0.0671182	0.585144	0.216087
	0.364447	0.465767	0.180398		0.380111	0.484966	0.188092		0.231504	0.538046	0.207992		0.0672077	0.585929	0.216428
	0.364504	0.465816	0.180682		0.380272	0.485358	0.188389		0.23163	0.538241	0.20832		0.0674817	0.586731	0.216769
	0.364801	0.466355	0.180966		0.380919	0.485729	0.188685		0.231941	0.538294	0.208647		0.0678144	0.5873	0.21711
	0.364915	0.466901	0.18125		0.381176	0.485849	0.188981		0.232236	0.540471	0.208975		0.0681244	0.587529	0.217451
	0.36529	0.467876	0.181534		0.381238	0.486173	0.189277		0.232818	0.54057	0.209302		0.0681654	0.58793	0.217791
	0.365656	0.468621	0.181818		0.381441	0.486197	0.189573		0.233486	0.540601	0.20963		0.0684246	0.588431	0.218132
	0.36577	0.468679	0.182102		0.382097	0.486249	0.18987		0.234298	0.540893	0.209957		0.0685172	0.588645	0.218473
	0.365809	0.46933	0.182386		0.38235	0.486292	0.190166		0.234584	0.541888	0.210285		0.0686689	0.58913	0.218814
	0.36653	0.469559	0.18267		0.382625	0.486416	0.190462		0.234827	0.54242	0.210613		0.0687114	0.589974	0.219155
	0.367129	0.469848	0.182955		0.383674	0.486662	0.190758		0.234939	0.543535	0.21094		0.0692193	0.590225	0.219496
	0.367223	0.469905	0.183239		0.384605	0.486897	0.191055		0.235607	0.543785	0.211268		0.0693886	0.590296	0.219836
	0.367251	0.470057	0.183523		0.384934	0.487009	0.191351		0.235692	0.543983	0.211595		0.0693902	0.5903	0.220177
	0.367722	0.470084	0.183807		0.385023	0.487136	0.191647		0.235801	0.544156	0.211923		0.069489	0.591499	0.220518
	0.367818	0.470449	0.184091		0.385576	0.487273	0.191943		0.235939	0.544377	0.21225		0.0695349	0.592007	0.220859
	0.36814	0.472739	0.184375		0.385879	0.48847	0.192239		0.236058	0.544868	0.212578		0.069619	0.592552	0.2212
	0.368219	0.472787	0.184659		0.386418	0.490361	0.192536		0.236816	0.545196	0.212905		0.0697104	0.592757	0.221541
	0.369128	0.473153	0.184943		0.386601	0.491264	0.192832		0.2369	0.545337	0.213233		0.0697725	0.592843	0.221881
	0.369854	0.473431	0.185227		0.387466	0.492148	0.193128		0.23742	0.547527	0.21356		0.070006	0.59482	0.222222
	0.369983	0.473643	0.185511		0.387863	0.492363	0.193424		0.238259	0.548485	0.213888		0.070166	0.595876	0.222563
	0.370193	0.47397	0.185795		0.387936	0.493339	0.19372		0.238463	0.548541	0.214216		0.070267	0.59739	0.222904
	0.370206	0.474021	0.18608		0.389249	0.493651	0.194017		0.238794	0.548898	0.214543		0.0703962	0.597525	0.223245
	0.370419	0.474113	0.186364		0.389988	0.494842	0.194313		0.239767	0.54894	0.214871		0.0705261	0.600205	0.223586
	0.370629	0.474322	0.186648		0.390581	0.496141	0.194609		0.239912	0.548955	0.215198		0.0706206	0.600729	0.223926
	0.370766	0.474568	0.186932		0.390898	0.497836	0.194905		0.239935	0.549516	0.215526		0.0706289	0.601186	0.224267
	0.373852	0.475429	0.187216		0.391214	0.497909	0.195201		0.239951	0.550229	0.215853		0.0708577	0.602123	0.224608
	0.374696	0.475468	0.1875		0.392474	0.498273	0.195498		0.240438	0.550531	0.216181		0.0709632	0.603186	0.224949
	0.375077	0.475582	0.187784		0.392661	0.498281	0.195794		0.242075	0.551314	0.216508		0.0713364	0.603599	0.22529
	0.375121	0.476253	0.188068		0.392675	0.49945	0.19609		0.242142	0.551488	0.216836		0.0713745	0.604291	0.225631
	0.375306	0.476339	0.188352		0.393344	0.50004	0.196386		0.243402	0.551549	0.217163		0.071446	0.605104	0.225971
	0.375314	0.47674	0.188636		0.394066	0.500397	0.196682		0.243583	0.551947	0.217491		0.0715091	0.605465	0.226312
	0.376626	0.477018	0.18892		0.394067	0.500761	0.196979		0.243748	0.552323	0.217819		0.0715364	0.60646	0.226653
	0.377698	0.477058	0.189205		0.394886	0.50115	0.197275		0.243917	0.552328	0.218146		0.0717136	0.607972	0.226994
	0.378427	0.477083	0.189489		0.395208	0.502097	0.197571		0.244536	0.552965	0.218474		0.0719402	0.608456	0.227335
	0.378428	0.4773	0.189773		0.395379	0.504085	0.197867		0.244633	0.55343	0.218801		0.0722126	0.60848	0.227676
	0.38	0.47752	0.190057		0.396209	0.504454	0.198164		0.244903	0.553577	0.219129		0.072235	0.609186	0.228016
	0.380523	0.478569	0.190341		0.39775	0.505216	0.19846		0.244935	0.554294	0.219456		0.0730488	0.609284	0.228357
	0.38093	0.478831	0.190625		0.398533	0.505492	0.198756		0.245067	0.554314	0.219784		0.0731939	0.610177	0.228698
	0.381048	0.478856	0.190909		0.399261	0.506323	0.199052		0.245934	0.554323	0.220111		0.0732965	0.61097	0.229039
	0.381702	0.479587	0.191193		0.399277	0.506597	0.199348		0.246328	0.554654	0.220439		0.073878	0.611398	0.22938
	0.382929	0.479821	0.191477		0.399308	0.506732	0.199645		0.247116	0.554852	0.220766		0.073965	0.611512	0.229721
	0.382944	0.480762	0.191761		0.399783	0.507326	0.199941		0.247164	0.554983	0.221094		0.0742608	0.612003	0.230061
	0.383089	0.481102	0.192045		0.401043	0.507512	0.200237		0.247242	0.555345	0.221422		0.0742695	0.612028	0.230402
	0.38314	0.481653	0.19233		0.401745	0.507604	0.200533		0.248043	0.555459	0.221749		0.0745569	0.61236	0.230743
	0.383798	0.481995	0.192614		0.40202	0.507676	0.200829		0.248486	0.555842	0.222077		0.0745756	0.612383	0.231084
	0.383807	0.482148	0.192898		0.403253	0.508208	0.201126		0.248678	0.556384	0.222404		0.0747249	0.612385	0.231425
	0.384531	0.482959	0.193182		0.403604	0.508938	0.201422		0.249611	0.557928	0.222732		0.0748862	0.61277	0.231766
	0.385915	0.483996	0.193466		0.404126	0.509148	0.201718		0.25023	0.558375	0.223059		0.0750757	0.612815	0.232106
	0.385935	0.484559	0.19375		0.404131	0.509334	0.202014		0.250437	0.558626	0.223387		0.0751638	0.613186	0.232447
	0.386056	0.484599	0.194034		0.404496	0.510661	0.20231		0.250798	0.558949	0.223714		0.0752843	0.613414	0.232788
	0.386165	0.48577	0.194318		0.405044	0.510985	0.202607		0.251572	0.559218	0.224042		0.0753552	0.61419	0.233129
	0.386634	0.485821	0.194602		0.405059	0.511039	0.202903		0.251633	0.559641	0.224369		0.0753553	0.614871	0.23347
	0.387539	0.486051	0.194886		0.405189	0.511059	0.203199		0.251871	0.560475	0.224697		0.0753904	0.617194	0.23381
	0.387902	0.486099	0.19517		0.405438	0.512323	0.203495		0.252173	0.560492	0.225025		0.0754561	0.617364	0.234151
	0.388026	0.486857	0.195455		0.405624	0.513192	0.203791		0.252616	0.560635	0.225352		0.0756565	0.617786	0.234492
	0.38978	0.486895	0.195739		0.405965	0.513217	0.204088		0.252674	0.561279	0.22568		0.0758682	0.61797	0.234833
	0.389974	0.48697	0.196023		0.406101	0.513314	0.204384		0.253248	0.561336	0.226007		0.0759887	0.618014	0.235174
	0.391354	0.487258	0.196307		0.406119	0.513954	0.20468		0.253943	0.561519	0.226335		0.0762007	0.618754	0.235515
	0.391841	0.487346	0.196591		0.407515	0.51408	0.204976		0.254545	0.561778	0.226662		0.0763233	0.62115	0.235855
	0.39235	0.487472	0.196875		0.408313	0.514094	0.205273		0.254947	0.561837	0.22699		0.0763691	0.622537	0.236196
	0.39251	0.487517	0.197159		0.408353	0.514762	0.205569		0.255152	0.561889	0.227317		0.076514	0.623543	0.236537
	0.393116	0.487635	0.197443		0.408501	0.515066	0.205865		0.255352	0.562915	0.227645		0.0772639	0.623712	0.236878
	0.395203	0.489163	0.197727		0.408883	0.515206	0.206161		0.255446	0.563664	0.227972		0.0773257	0.623783	0.237219
	0.395206	0.489738	0.198011		0.409189	0.515967	0.206457		0.256039	0.563968	0.2283		0.0773291	0.625923	0.23756
	0.395759	0.491399	0.198295		0.409848	0.516155	0.206754		0.256546	0.564069	0.228628		0.0776891	0.625944	0.2379
	0.396172	0.491789	0.19858		0.409937	0.516802	0.20705		0.256655	0.567766	0.228955		0.0777703	0.626249	0.238241
	0.396297	0.492899	0.198864		0.410136	0.517712	0.207346		0.257928	0.568626	0.229283		0.0780859	0.626511	0.238582
	0.396442	0.493159	0.199148		0.410941	0.518018	0.207642		0.257983	0.568935	0.22961		0.0783308	0.626906	0.238923
	0.396702	0.493236	0.199432		0.412208	0.518163	0.207938		0.259681	0.569113	0.229938		0.0783936	0.627149	0.239264
	0.398362	0.493457	0.199716		0.412877	0.51905	0.208235		0.259818	0.569809	0.230265		0.0783997	0.627274	0.239605
	0.398759	0.493551	0.2		0.414329	0.519672	0.208531		0.259961	0.570286	0.230593		0.0788455	0.627782	0.239945
	0.399988	0.493665	0.200284		0.416394	0.519718	0.208827		0.261466	0.570535	0.23092		0.0790384	0.629148	0.240286
	0.401029	0.49379	0.200568		0.416704	0.519865	0.209123		0.262147	0.570655	0.231248		0.0790652	0.629449	0.240627
	0.401218	0.493858	0.200852		0.417277	0.520142	0.209419		0.262483	0.570686	0.231575		0.079549	0.629917	0.240968
	0.402298	0.493941	0.201136		0.417537	0.520848	0.209716		0.264026	0.570781	0.231903		0.0796793	0.631356	0.241309
	0.402475	0.494057	0.20142		0.417918	0.521599	0.210012		0.264221	0.570879	0.232231		0.0797533	0.632051	0.24165
	0.402514	0.494469	0.201705		0.419239	0.521861	0.210308		0.26425	0.570893	0.232558		0.079839	0.632181	0.24199
	0.403069	0.495536	0.201989		0.420995	0.52333	0.210604		0.264398	0.571581	0.232886		0.0798625	0.633906	0.242331
	0.403186	0.496741	0.202273		0.421224	0.523411	0.2109		0.264903	0.572079	0.233213		0.0799135	0.634276	0.242672
	0.403613	0.497741	0.202557		0.421379	0.524182	0.211197		0.265146	0.572367	0.233541		0.0799988	0.634321	0.243013
	0.403755	0.498703	0.202841		0.422242	0.524985	0.211493		0.265264	0.57247	0.233868		0.0802	0.63456	0.243354
	0.403938	0.498807	0.203125		0.422389	0.525568	0.211789		0.266118	0.572831	0.234196		0.0804235	0.634561	0.243695
	0.404017	0.499366	0.203409		0.423932	0.525679	0.212085		0.266374	0.573102	0.234523		0.0808069	0.635115	0.244035
	0.404343	0.499375	0.203693		0.423963	0.526531	0.212382		0.26657	0.573201	0.234851		0.0810456	0.635416	0.244376
	0.404653	0.500272	0.203977		0.424095	0.527416	0.212678		0.267146	0.573585	0.235179		0.0811733	0.635665	0.244717
	0.405392	0.502009	0.204261		0.425063	0.527901	0.212974		0.267352	0.573632	0.235506		0.0817077	0.635739	0.245058
	0.405619	0.502914	0.204545		0.425526	0.52912	0.21327		0.268348	0.574018	0.235834		0.0821374	0.635754	0.245399
	0.405723	0.503324	0.20483		0.425534	0.529252	0.213566		0.268481	0.575141	0.236161		0.0823195	0.636427	0.24574
	0.405881	0.503675	0.205114		0.42628	0.529978	0.213863		0.269876	0.575499	0.236489		0.0824957	0.636435	0.24608
	0.406806	0.506529	0.205398		0.427082	0.530256	0.214159		0.270199	0.576581	0.236816		0.0825137	0.636786	0.246421
	0.407355	0.506715	0.205682		0.427219	0.531154	0.214455		0.273225	0.578239	0.237144		0.0830824	0.63689	0.246762
	0.407862	0.507129	0.205966		0.427297	0.531913	0.214751		0.273951	0.578824	0.237471		0.0831263	0.637146	0.247103
	0.40851	0.507516	0.20625		0.427565	0.531932	0.215047		0.274458	0.579456	0.237799		0.0832466	0.63874	0.247444
	0.408702	0.507693	0.206534		0.427677	0.531969	0.215344		0.274706	0.579779	0.238126		0.0832466	0.639002	0.247785
	0.40894	0.507786	0.206818		0.428103	0.532445	0.21564		0.275015	0.579981	0.238454		0.0832718	0.639157	0.248125
	0.40981	0.507873	0.207102		0.428264	0.532715	0.215936		0.275046	0.580621	0.238782		0.0835991	0.639176	0.248466
	0.409875	0.509179	0.207386		0.42844	0.53287	0.216232		0.275636	0.580622	0.239109		0.0836279	0.639966	0.248807
	0.410516	0.509353	0.20767		0.428555	0.532923	0.216528		0.27609	0.581205	0.239437		0.0836508	0.641128	0.249148
	0.411388	0.510255	0.207955		0.429017	0.533344	0.216825		0.27651	0.581576	0.239764		0.0840702	0.641493	0.249489
	0.411419	0.510733	0.208239		0.429279	0.533468	0.217121		0.276688	0.582047	0.240092		0.0842359	0.641837	0.24983
	0.411467	0.511787	0.208523		0.433055	0.534004	0.217417		0.277564	0.583433	0.240419		0.0843728	0.643261	0.25017
	0.412089	0.512612	0.208807		0.434988	0.534773	0.217713		0.278056	0.584393	0.240747		0.0846317	0.643748	0.250511
	0.412259	0.512954	0.209091		0.435808	0.534799	0.218009		0.279811	0.584728	0.241074		0.0847727	0.64387	0.250852
	0.412451	0.513119	0.209375		0.435903	0.534884	0.218306		0.279834	0.586714	0.241402		0.0849119	0.644585	0.251193
	0.41274	0.513323	0.209659		0.43664	0.536526	0.218602		0.280228	0.587018	0.241729		0.0849639	0.644597	0.251534
	0.413166	0.513737	0.209943		0.436733	0.537264	0.218898		0.280716	0.587084	0.242057		0.0849761	0.644817	0.251875
	0.41323	0.513752	0.210227		0.437092	0.53801	0.219194		0.281595	0.587495	0.242385		0.0849826	0.645728	0.252215
	0.413234	0.513754	0.210511		0.438834	0.538575	0.219491		0.282289	0.587672	0.242712		0.0852367	0.646257	0.252556
	0.413565	0.514104	0.210795		0.439149	0.538952	0.219787		0.282809	0.588815	0.24304		0.0853057	0.647405	0.252897
	0.413796	0.514812	0.21108		0.439797	0.539356	0.220083		0.282827	0.589164	0.243367		0.0859685	0.64797	0.253238
	0.414704	0.515054	0.211364		0.439816	0.540307	0.220379		0.283191	0.589582	0.243695		0.0861364	0.649517	0.253579
	0.414706	0.51573	0.211648		0.440386	0.540761	0.220675		0.283569	0.590707	0.244022		0.0861385	0.650988	0.25392
	0.415332	0.515763	0.211932		0.440912	0.540906	0.220972		0.284708	0.592521	0.24435		0.0861735	0.651571	0.25426
	0.415973	0.515986	0.212216		0.441161	0.541709	0.221268		0.284926	0.593298	0.244677		0.0865909	0.654195	0.254601
	0.416306	0.516209	0.2125		0.44119	0.542074	0.221564		0.285164	0.593359	0.245005		0.0869939	0.654245	0.254942
	0.417861	0.516374	0.212784		0.441311	0.542893	0.22186		0.287234	0.594218	0.245332		0.0873044	0.654633	0.255283
	0.418433	0.516728	0.213068		0.44166	0.543744	0.222156		0.288675	0.594837	0.24566		0.0874569	0.65512	0.255624
	0.418453	0.518042	0.213352		0.442642	0.544762	0.222453		0.289086	0.596068	0.245988		0.0878472	0.655135	0.255965
	0.420626	0.518042	0.213636		0.442843	0.545388	0.222749		0.289251	0.59664	0.246315		0.0879093	0.656251	0.256305
	0.420841	0.518085	0.21392		0.443282	0.545521	0.223045		0.289532	0.597457	0.246643		0.0882119	0.656771	0.256646
	0.421498	0.518335	0.214205		0.444971	0.545569	0.223341		0.289899	0.597707	0.24697		0.0882653	0.657686	0.256987
	0.422146	0.518727	0.214489		0.445311	0.545695	0.223637		0.290804	0.59786	0.247298		0.0882664	0.657847	0.257328
	0.422247	0.518826	0.214773		0.445543	0.545916	0.223934		0.290891	0.598521	0.247625		0.0882715	0.658373	0.257669
	0.422333	0.519051	0.215057		0.445752	0.547254	0.22423		0.290995	0.599196	0.247953		0.0884591	0.658814	0.25801
	0.423715	0.520824	0.215341		0.445951	0.547489	0.224526		0.292611	0.599215	0.24828		0.0886409	0.658876	0.25835
	0.423915	0.520862	0.215625		0.446135	0.547514	0.224822		0.292733	0.599909	0.248608		0.0895166	0.660012	0.258691
	0.424897	0.52295	0.215909		0.44643	0.547806	0.225118		0.293065	0.600394	0.248935		0.0896588	0.66069	0.259032
	0.425132	0.522967	0.216193		0.446519	0.547936	0.225415		0.293183	0.600443	0.249263		0.0900479	0.660881	0.259373
	0.425728	0.523266	0.216477		0.447145	0.549003	0.225711		0.293696	0.600547	0.249591		0.0901528	0.661075	0.259714
	0.427651	0.523635	0.216761		0.448095	0.550342	0.226007		0.294989	0.60122	0.249918		0.0903964	0.661266	0.260055
	0.42777	0.523682	0.217045		0.448679	0.550736	0.226303		0.295045	0.602185	0.250246		0.0904637	0.661327	0.260395
	0.429115	0.523908	0.21733		0.44882	0.550938	0.2266		0.29555	0.603292	0.250573		0.090735	0.662086	0.260736
	0.429468	0.523939	0.217614		0.44898	0.551401	0.226896		0.296652	0.603496	0.250901		0.0908192	0.662568	0.261077
	0.429561	0.524481	0.217898		0.449129	0.551526	0.227192		0.296838	0.604623	0.251228		0.091276	0.662852	0.261418
	0.429794	0.524506	0.218182		0.449162	0.551645	0.227488		0.297508	0.604796	0.251556		0.0913841	0.663076	0.261759
	0.431874	0.524754	0.218466		0.44928	0.551828	0.227784		0.298223	0.606188	0.251883		0.0916633	0.663263	0.2621
	0.431959	0.524901	0.21875		0.449686	0.552021	0.228081		0.29841	0.606538	0.252211		0.0920339	0.664013	0.26244
	0.432666	0.525099	0.219034		0.449741	0.552644	0.228377		0.298971	0.606785	0.252538		0.0923118	0.664067	0.262781
	0.432977	0.525265	0.219318		0.449765	0.553362	0.228673		0.299187	0.607368	0.252866		0.092333	0.664309	0.263122
	0.433307	0.525865	0.219602		0.450255	0.553962	0.228969		0.300599	0.607402	0.253194		0.0924966	0.664957	0.263463
	0.43332	0.526114	0.219886		0.451598	0.553967	0.229265		0.30066	0.607749	0.253521		0.093206	0.665013	0.263804
	0.433934	0.526267	0.22017		0.452636	0.554004	0.229562		0.300728	0.60876	0.253849		0.0934213	0.665708	0.264145
	0.43576	0.526692	0.220455		0.453187	0.554432	0.229858		0.301026	0.609226	0.254176		0.093446	0.666502	0.264485
	0.436069	0.526725	0.220739		0.453533	0.5546	0.230154		0.30156	0.609411	0.254504		0.0936284	0.666582	0.264826
	0.437471	0.527156	0.221023		0.453735	0.555064	0.23045		0.30157	0.6098	0.254831		0.0936471	0.667373	0.265167
	0.438008	0.52847	0.221307		0.453745	0.556449	0.230746		0.301679	0.610342	0.255159		0.0936955	0.667582	0.265508
	0.438411	0.528496	0.221591		0.45386	0.557904	0.231043		0.301689	0.610711	0.255486		0.0938187	0.668871	0.265849
	0.439411	0.528635	0.221875		0.455875	0.558054	0.231339		0.304062	0.611956	0.255814		0.094125	0.669115	0.26619
	0.439609	0.528754	0.222159		0.455896	0.558728	0.231635		0.305909	0.612	0.256142		0.0942749	0.669651	0.26653
	0.439706	0.529248	0.222443		0.457062	0.558833	0.231931		0.306775	0.612783	0.256469		0.0943833	0.670167	0.266871
	0.439843	0.530526	0.222727		0.457323	0.559579	0.232227		0.307919	0.614116	0.256797		0.094677	0.670643	0.267212
	0.441819	0.530705	0.223011		0.457389	0.559818	0.232524		0.30851	0.615819	0.257124		0.0946848	0.671064	0.267553
	0.44277	0.53111	0.223295		0.458433	0.560792	0.23282		0.30876	0.615988	0.257452		0.094876	0.671142	0.267894
	0.443371	0.531727	0.22358		0.458645	0.560868	0.233116		0.308872	0.616103	0.257779		0.0952527	0.672186	0.268234
	0.443638	0.532948	0.223864		0.458655	0.561036	0.233412		0.30932	0.6175	0.258107		0.0954474	0.672208	0.268575
	0.443647	0.533141	0.224148		0.459796	0.561521	0.233709		0.309515	0.617852	0.258434		0.0955593	0.672735	0.268916
	0.44406	0.533914	0.224432		0.460119	0.561852	0.234005		0.309573	0.618119	0.258762		0.0956638	0.673275	0.269257
	0.445223	0.534488	0.224716		0.460229	0.561879	0.234301		0.31018	0.618666	0.259089		0.095811	0.673316	0.269598
	0.445328	0.535523	0.225		0.460495	0.562623	0.234597		0.311997	0.618839	0.259417		0.0958497	0.673482	0.269939
	0.445558	0.53594	0.225284		0.462371	0.562799	0.234893		0.312021	0.619485	0.259745		0.0961153	0.674106	0.270279
	0.445611	0.536435	0.225568		0.462644	0.563449	0.23519		0.312072	0.61968	0.260072		0.0963505	0.674118	0.27062
	0.445663	0.536647	0.225852		0.462886	0.564613	0.235486		0.312922	0.620029	0.2604		0.0963854	0.674163	0.270961
	0.447809	0.536959	0.226136		0.463053	0.565258	0.235782		0.312937	0.621171	0.260727		0.096552	0.675123	0.271302
	0.448554	0.537402	0.22642		0.464156	0.565934	0.236078		0.313516	0.621208	0.261055		0.0966745	0.675813	0.271643
	0.448799	0.537996	0.226705		0.464613	0.566128	0.236374		0.31385	0.621294	0.261382		0.0966776	0.676225	0.271984
	0.449129	0.5383	0.226989		0.465536	0.566203	0.236671		0.31393	0.621718	0.26171		0.0968478	0.677644	0.272324
	0.449286	0.538507	0.227273		0.465812	0.566375	0.236967		0.313979	0.62217	0.262037		0.0972776	0.67804	0.272665
	0.449532	0.53988	0.227557		0.465987	0.567684	0.237263		0.314684	0.622487	0.262365		0.0973149	0.678833	0.273006
	0.450251	0.540085	0.227841		0.466647	0.568974	0.237559		0.314905	0.622987	0.262692		0.0973491	0.678926	0.273347
	0.450663	0.540766	0.228125		0.466824	0.569451	0.237855		0.315633	0.623136	0.26302		0.0974149	0.679132	0.273688
	0.451568	0.541016	0.228409		0.466971	0.569752	0.238152		0.31609	0.623456	0.263348		0.0974832	0.679723	0.274029
	0.45199	0.541756	0.228693		0.467366	0.569835	0.238448		0.318385	0.623839	0.263675		0.0974958	0.680644	0.274369
	0.452085	0.541919	0.228977		0.467518	0.570554	0.238744		0.318451	0.624333	0.264003		0.0975761	0.68111	0.27471
	0.452458	0.542176	0.229261		0.467778	0.572334	0.23904		0.319821	0.625089	0.26433		0.0975769	0.681361	0.275051
	0.45394	0.542203	0.229545		0.468174	0.572819	0.239336		0.32008	0.625489	0.264658		0.0977223	0.68147	0.275392
	0.454212	0.542508	0.22983		0.468885	0.573566	0.239633		0.320082	0.626501	0.264985		0.0977257	0.681482	0.275733
	0.454221	0.542772	0.230114		0.469903	0.573796	0.239929		0.320385	0.627963	0.265313		0.0981823	0.682004	0.276074
	0.454893	0.542899	0.230398		0.47019	0.573968	0.240225		0.320418	0.628181	0.26564		0.0982818	0.683578	0.276414
	0.455006	0.54347	0.230682		0.471465	0.574043	0.240521		0.320777	0.628217	0.265968		0.0982956	0.683743	0.276755
	0.455385	0.544115	0.230966		0.471568	0.574484	0.240818		0.322329	0.628334	0.266295		0.0983883	0.684408	0.277096
	0.45815	0.544339	0.23125		0.472095	0.575127	0.241114		0.3228	0.628429	0.266623		0.0987147	0.684787	0.277437
	0.458239	0.545235	0.231534		0.472407	0.575302	0.24141		0.324097	0.62975	0.266951		0.098979	0.684887	0.277778
	0.458337	0.545585	0.231818		0.472648	0.575892	0.241706		0.325049	0.629923	0.267278		0.0992589	0.685012	0.278119
	0.458697	0.545816	0.232102		0.472833	0.576305	0.242002		0.325072	0.630365	0.267606		0.0993597	0.685771	0.278459
	0.460071	0.546606	0.232386		0.473192	0.576681	0.242299		0.325306	0.630726	0.267933		0.0993807	0.686968	0.2788
	0.460222	0.547346	0.23267		0.474291	0.576808	0.242595		0.325391	0.631279	0.268261		0.0994674	0.687124	0.279141
	0.460673	0.548038	0.232955		0.474488	0.577671	0.242891		0.325736	0.63294	0.268588		0.0995712	0.689339	0.279482
	0.461011	0.548054	0.233239		0.474612	0.577746	0.243187		0.325944	0.634366	0.268916		0.0995877	0.689436	0.279823
	0.461188	0.548287	0.233523		0.475156	0.577829	0.243483		0.326232	0.634441	0.269243		0.099827	0.690565	0.280164
	0.461473	0.548336	0.233807		0.476482	0.577999	0.24378		0.326294	0.635303	0.269571		0.0999076	0.690745	0.280504
	0.461867	0.548947	0.234091		0.477536	0.578253	0.244076		0.326475	0.635662	0.269898		0.100599	0.69095	0.280845
	0.462262	0.549123	0.234375		0.479446	0.578642	0.244372		0.326785	0.636109	0.270226		0.100642	0.691408	0.281186
	0.464243	0.549483	0.234659		0.480356	0.579264	0.244668		0.327565	0.636762	0.270554		0.100843	0.691421	0.281527
	0.464254	0.55263	0.234943		0.481797	0.579612	0.244964		0.327746	0.637141	0.270881		0.100897	0.691466	0.281868
	0.464317	0.552777	0.235227		0.482795	0.579617	0.245261		0.327766	0.63787	0.271209		0.100916	0.691668	0.282209
	0.464537	0.553422	0.235511		0.483128	0.57965	0.245557		0.328036	0.637942	0.271536		0.100923	0.691786	0.282549
	0.465243	0.553525	0.235795		0.483903	0.580553	0.245853		0.328465	0.638013	0.271864		0.101013	0.691953	0.28289
	0.465444	0.554	0.23608		0.484093	0.580871	0.246149		0.328491	0.638197	0.272191		0.101072	0.692249	0.283231
	0.4663	0.55532	0.236364		0.484385	0.580882	0.246445		0.328947	0.638331	0.272519		0.101312	0.692383	0.283572
	0.4663	0.555866	0.236648		0.484888	0.581268	0.246742		0.329022	0.638858	0.272846		0.101533	0.693184	0.283913
	0.466427	0.556616	0.236932		0.485344	0.58145	0.247038		0.329184	0.639092	0.273174		0.101712	0.696099	0.284254
	0.468158	0.557021	0.237216		0.486483	0.5817	0.247334		0.329765	0.639782	0.273501		0.101758	0.696206	0.284594
	0.468381	0.557027	0.2375		0.48677	0.582123	0.24763		0.330001	0.639974	0.273829		0.101884	0.696284	0.284935
	0.469576	0.557615	0.237784		0.487152	0.582139	0.247927		0.330258	0.642945	0.274157		0.102175	0.696401	0.285276
	0.469797	0.55774	0.238068		0.487636	0.583373	0.248223		0.331401	0.643744	0.274484		0.102291	0.696787	0.285617
	0.470118	0.557746	0.238352		0.488487	0.584446	0.248519		0.331732	0.644461	0.274812		0.102428	0.697977	0.285958
	0.470651	0.558149	0.238636		0.488826	0.584484	0.248815		0.332197	0.645314	0.275139		0.102519	0.698016	0.286299
	0.470764	0.558976	0.23892		0.48934	0.584507	0.249111		0.332553	0.645756	0.275467		0.1026	0.698315	0.286639
	0.470874	0.559528	0.239205		0.490225	0.584704	0.249408		0.334328	0.646021	0.275794		0.102658	0.699286	0.28698
	0.47102	0.559884	0.239489		0.4908	0.584864	0.249704		0.334692	0.646327	0.276122		0.102692	0.699343	0.287321
	0.471769	0.560228	0.239773		0.491141	0.585158	0.25		0.334982	0.646802	0.276449		0.102792	0.69949	0.287662
	0.472508	0.56028	0.240057		0.491982	0.585314	0.250296		0.335361	0.646868	0.276777		0.102909	0.699612	0.288003
	0.47291	0.560755	0.240341		0.492321	0.585486	0.250592		0.336526	0.647791	0.277104		0.102941	0.699771	0.288344
	0.474239	0.560995	0.240625		0.4929	0.585575	0.250889		0.337152	0.647991	0.277432		0.103088	0.699902	0.288684
	0.474292	0.561571	0.240909		0.493545	0.586327	0.251185		0.338127	0.648206	0.27776		0.103138	0.700876	0.289025
	0.474619	0.561667	0.241193		0.493734	0.586823	0.251481		0.338419	0.648923	0.278087		0.103147	0.700918	0.289366
	0.475109	0.561991	0.241477		0.493737	0.587055	0.251777		0.339086	0.649486	0.278415		0.103587	0.701156	0.289707
	0.475722	0.562429	0.241761		0.494234	0.588375	0.252073		0.339494	0.649812	0.278742		0.103767	0.701785	0.290048
	0.47581	0.562505	0.242045		0.494512	0.588621	0.25237		0.339717	0.650493	0.27907		0.103806	0.702526	0.290389
	0.476131	0.563388	0.24233		0.495087	0.58866	0.252666		0.340985	0.651483	0.279397		0.103997	0.703867	0.290729
	0.476651	0.564283	0.242614		0.495314	0.589214	0.252962		0.341119	0.651917	0.279725		0.104462	0.7042	0.29107
	0.476867	0.564623	0.242898		0.495382	0.589269	0.253258		0.341396	0.651929	0.280052		0.105361	0.70451	0.291411
	0.476982	0.564701	0.243182		0.495716	0.589629	0.253555		0.34213	0.652488	0.28038		0.105395	0.704655	0.291752
	0.477006	0.565523	0.243466		0.495829	0.590109	0.253851		0.342848	0.652597	0.280708		0.105883	0.704923	0.292093
	0.477121	0.565829	0.24375		0.497204	0.590239	0.254147		0.343109	0.652632	0.281035		0.105986	0.705337	0.292434
	0.477786	0.565839	0.244034		0.497397	0.590415	0.254443		0.343239	0.653146	0.281363		0.105995	0.706762	0.292774
	0.477816	0.565896	0.244318		0.497875	0.591913	0.254739		0.343322	0.653493	0.28169		0.106165	0.707113	0.293115
	0.478138	0.566242	0.244602		0.498359	0.591964	0.255036		0.343637	0.655629	0.282018		0.106179	0.707543	0.293456
	0.478255	0.566738	0.244886		0.498493	0.592194	0.255332		0.344999	0.656171	0.282345		0.106229	0.707639	0.293797
	0.478531	0.566995	0.24517		0.498905	0.592481	0.255628		0.345121	0.656252	0.282673		0.106355	0.708051	0.294138
	0.478844	0.567771	0.245455		0.499615	0.59407	0.255924		0.345991	0.65639	0.283		0.106577	0.709497	0.294479
	0.480478	0.567791	0.245739		0.499804	0.594434	0.25622		0.346343	0.65712	0.283328		0.106782	0.709713	0.294819
	0.480629	0.568108	0.246023		0.499986	0.59471	0.256517		0.346713	0.657212	0.283655		0.106844	0.709755	0.29516
	0.480664	0.568576	0.246307		0.500727	0.594938	0.256813		0.34688	0.658109	0.283983		0.106888	0.710019	0.295501
	0.480681	0.569207	0.246591		0.501353	0.594972	0.257109		0.348009	0.658234	0.284311		0.107092	0.710732	0.295842
	0.48114	0.56921	0.246875		0.501675	0.595427	0.257405		0.34884	0.658549	0.284638		0.107163	0.710877	0.296183
	0.483181	0.569675	0.247159		0.502329	0.596748	0.257701		0.348986	0.65894	0.284966		0.107179	0.711182	0.296524
	0.483289	0.569701	0.247443		0.502632	0.596805	0.257998		0.349296	0.658967	0.285293		0.107339	0.711284	0.296864
	0.483421	0.56975	0.247727		0.50296	0.596896	0.258294		0.349419	0.659456	0.285621		0.107375	0.711934	0.297205
	0.483715	0.569817	0.248011		0.504003	0.596921	0.25859		0.350695	0.659467	0.285948		0.107419	0.712248	0.297546
	0.48433	0.570284	0.248295		0.504114	0.596946	0.258886		0.351869	0.661611	0.286276		0.107734	0.712441	0.297887
	0.486717	0.570399	0.24858		0.50414	0.596959	0.259182		0.351883	0.661677	0.286603		0.107816	0.714038	0.298228
	0.48673	0.570664	0.248864		0.504787	0.597176	0.259479		0.352098	0.662206	0.286931		0.108081	0.714472	0.298569
	0.486928	0.571343	0.249148		0.505769	0.597684	0.259775		0.353631	0.662334	0.287258		0.108145	0.715532	0.298909
	0.486945	0.571827	0.249432		0.506334	0.597966	0.260071		0.353653	0.662538	0.287586		0.108633	0.716235	0.29925
	0.487093	0.573208	0.249716		0.508604	0.599535	0.260367		0.353968	0.662911	0.287914		0.108667	0.716575	0.299591
	0.487424	0.573209	0.25		0.508709	0.599615	0.260664		0.354159	0.663752	0.288241		0.108899	0.716614	0.299932
	0.487709	0.573922	0.250284		0.509028	0.601148	0.26096		0.354575	0.66467	0.288569		0.10908	0.717211	0.300273
	0.488264	0.575101	0.250568		0.509695	0.601417	0.261256		0.354997	0.6664	0.288896		0.109178	0.717387	0.300613
	0.488326	0.576664	0.250852		0.509774	0.601485	0.261552		0.355255	0.666476	0.289224		0.109282	0.717922	0.300954
	0.488885	0.577389	0.251136		0.51014	0.60181	0.261848		0.355591	0.667501	0.289551		0.109518	0.718151	0.301295
	0.489428	0.578338	0.25142		0.510788	0.601904	0.262145		0.355937	0.668248	0.289879		0.109596	0.719149	0.301636
	0.489684	0.579723	0.251705		0.511107	0.602904	0.262441		0.356116	0.668801	0.290206		0.109697	0.719846	0.301977
	0.490229	0.579832	0.251989		0.511438	0.603153	0.262737		0.356516	0.669623	0.290534		0.10972	0.720125	0.302318
	0.490399	0.580039	0.252273		0.51188	0.603826	0.263033		0.356694	0.669639	0.290861		0.110049	0.72038	0.302658
	0.49229	0.581346	0.252557		0.512263	0.603972	0.263329		0.356783	0.669806	0.291189		0.110071	0.720417	0.302999
	0.492566	0.581414	0.252841		0.51229	0.604033	0.263626		0.357273	0.672391	0.291517		0.110258	0.720743	0.30334
	0.492808	0.581445	0.253125		0.512435	0.604784	0.263922		0.357669	0.672788	0.291844		0.110405	0.721392	0.303681
	0.492903	0.581762	0.253409		0.512892	0.605068	0.264218		0.357901	0.674244	0.292172		0.110485	0.721413	0.304022
	0.493501	0.58209	0.253693		0.513064	0.605387	0.264514		0.357951	0.674833	0.292499		0.110554	0.722201	0.304363
	0.49366	0.583339	0.253977		0.513773	0.606505	0.26481		0.358416	0.674964	0.292827		0.110567	0.722359	0.304703
	0.494538	0.583487	0.254261		0.514266	0.606749	0.265107		0.358479	0.675231	0.293154		0.11059	0.723473	0.305044
	0.495083	0.583557	0.254545		0.514441	0.607404	0.265403		0.360601	0.67539	0.293482		0.110679	0.725606	0.305385
	0.4954	0.583588	0.25483		0.514512	0.608189	0.265699		0.361028	0.675505	0.293809		0.110804	0.726269	0.305726
	0.495801	0.583657	0.255114		0.515041	0.608384	0.265995		0.361178	0.67607	0.294137		0.110864	0.726801	0.306067
	0.496308	0.5839	0.255398		0.515643	0.609045	0.266291		0.361179	0.67647	0.294464		0.110943	0.727469	0.306408
	0.49634	0.584534	0.255682		0.516844	0.609133	0.266588		0.361639	0.676556	0.294792		0.110953	0.728541	0.306748
	0.496596	0.584938	0.255966		0.51743	0.609689	0.266884		0.362049	0.676886	0.29512		0.111175	0.728931	0.307089
	0.497004	0.584966	0.25625		0.517806	0.60979	0.26718		0.364018	0.677582	0.295447		0.111311	0.729283	0.30743
	0.497277	0.585006	0.256534		0.518425	0.610077	0.267476		0.364121	0.678103	0.295775		0.111474	0.729462	0.307771
	0.497491	0.58547	0.256818		0.51922	0.61085	0.267773		0.364995	0.67903	0.296102		0.111528	0.729788	0.308112
	0.497539	0.585724	0.257102		0.519375	0.610851	0.268069		0.36543	0.679566	0.29643		0.111648	0.729946	0.308453
	0.498265	0.585729	0.257386		0.519523	0.611251	0.268365		0.366318	0.679748	0.296757		0.111803	0.73022	0.308793
	0.499155	0.586075	0.25767		0.519991	0.611595	0.268661		0.366471	0.680021	0.297085		0.111983	0.731027	0.309134
	0.499211	0.586958	0.257955		0.520951	0.612265	0.268957		0.367065	0.681772	0.297412		0.112142	0.733026	0.309475
	0.499634	0.587123	0.258239		0.521034	0.613272	0.269254		0.367434	0.682967	0.29774		0.112361	0.733652	0.309816
	0.50045	0.587287	0.258523		0.521571	0.613833	0.26955		0.367837	0.683479	0.298067		0.112436	0.735219	0.310157
	0.500506	0.587503	0.258807		0.521864	0.614242	0.269846		0.368257	0.684442	0.298395		0.112865	0.735579	0.310498
	0.501744	0.589754	0.259091		0.522269	0.614399	0.270142		0.368771	0.684784	0.298723		0.11288	0.736073	0.310838
	0.502465	0.590506	0.259375		0.522985	0.614852	0.270438		0.369758	0.685669	0.29905		0.113147	0.737379	0.311179
	0.502883	0.59129	0.259659		0.523703	0.616656	0.270735		0.370606	0.685773	0.299378		0.113161	0.737487	0.31152
	0.503178	0.591537	0.259943		0.524523	0.617033	0.271031		0.370649	0.686278	0.299705		0.113165	0.739496	0.311861
	0.503759	0.59172	0.260227		0.524725	0.617851	0.271327		0.37115	0.687026	0.300033		0.11317	0.740597	0.312202
	0.503868	0.591937	0.260511		0.524827	0.618565	0.271623		0.37117	0.687675	0.30036		0.113313	0.740979	0.312543
	0.504086	0.592171	0.260795		0.524994	0.618645	0.271919		0.371412	0.689528	0.300688		0.113629	0.741228	0.312883
	0.505435	0.592596	0.26108		0.525185	0.618675	0.272216		0.371674	0.689802	0.301015		0.113717	0.741704	0.313224
	0.505445	0.593126	0.261364		0.525653	0.618823	0.272512		0.371871	0.690122	0.301343		0.114048	0.741935	0.313565
	0.505774	0.594002	0.261648		0.52607	0.618996	0.272808		0.372551	0.691662	0.30167		0.114716	0.743327	0.313906
	0.508853	0.594131	0.261932		0.527274	0.619412	0.273104		0.372611	0.691833	0.301998		0.114831	0.743334	0.314247
	0.509392	0.594297	0.262216		0.52731	0.619425	0.2734		0.373138	0.692057	0.302326		0.114847	0.746955	0.314588
	0.510759	0.595384	0.2625		0.528189	0.61998	0.273697		0.374089	0.692318	0.302653		0.114919	0.747255	0.314928
	0.511421	0.596715	0.262784		0.528245	0.620219	0.273993		0.374218	0.69271	0.302981		0.115286	0.7479	0.315269
	0.511868	0.597042	0.263068		0.52911	0.620382	0.274289		0.374761	0.693089	0.303308		0.115326	0.749485	0.31561
	0.512096	0.597544	0.263352		0.529214	0.620947	0.274585		0.375715	0.693246	0.303636		0.115339	0.749587	0.315951
	0.512118	0.597602	0.263636		0.530592	0.621048	0.274882		0.375754	0.693667	0.303963		0.11535	0.750087	0.316292
	0.512563	0.597711	0.26392		0.530893	0.621824	0.275178		0.376419	0.693713	0.304291		0.115386	0.750545	0.316633
	0.512735	0.597799	0.264205		0.531005	0.622223	0.275474		0.376426	0.693945	0.304618		0.115647	0.75106	0.316973
	0.513032	0.597975	0.264489		0.531255	0.622428	0.27577		0.376518	0.694407	0.304946		0.115801	0.751546	0.317314
	0.513505	0.598057	0.264773		0.532008	0.622438	0.276066		0.377808	0.694636	0.305274		0.115858	0.752428	0.317655
	0.513862	0.598492	0.265057		0.532898	0.622547	0.276363		0.378132	0.694843	0.305601		0.115968	0.752795	0.317996
	0.514591	0.599381	0.265341		0.533065	0.622626	0.276659		0.378371	0.695149	0.305929		0.115989	0.753153	0.318337
	0.515908	0.599525	0.265625		0.533216	0.622943	0.276955		0.37902	0.696001	0.306256		0.116033	0.753399	0.318678
	0.516007	0.599536	0.265909		0.534383	0.623006	0.277251		0.379278	0.696516	0.306584		0.116049	0.75397	0.319018
	0.51647	0.599965	0.266193		0.534889	0.623373	0.277547		0.379297	0.697386	0.306911		0.116103	0.754283	0.319359
	0.517207	0.601369	0.266477		0.53741	0.624189	0.277844		0.379346	0.698898	0.307239		0.11636	0.754498	0.3197
	0.517258	0.601841	0.266761		0.537641	0.624943	0.27814		0.379409	0.699044	0.307566		0.116366	0.754686	0.320041
	0.517411	0.603061	0.267045		0.538419	0.625568	0.278436		0.379903	0.699439	0.307894		0.116676	0.754789	0.320382
	0.517837	0.603277	0.26733		0.538643	0.625699	0.278732		0.381001	0.699639	0.308221		0.116706	0.754805	0.320723
	0.519953	0.603391	0.267614		0.53889	0.626322	0.279028		0.381263	0.699921	0.308549		0.117288	0.755695	0.321063
	0.520282	0.60414	0.267898		0.539025	0.626816	0.279325		0.381945	0.70008	0.308877		0.117492	0.755707	0.321404
	0.521188	0.604244	0.268182		0.539046	0.627284	0.279621		0.382844	0.700705	0.309204		0.117644	0.758049	0.321745
	0.52127	0.604327	0.268466		0.539195	0.628522	0.279917		0.383022	0.701392	0.309532		0.117865	0.758092	0.322086
	0.521919	0.604539	0.26875		0.539729	0.628549	0.280213		0.38389	0.701525	0.309859		0.117915	0.758728	0.322427
	0.522302	0.605681	0.269034		0.539979	0.629968	0.280509		0.384522	0.702627	0.310187		0.118229	0.760023	0.322768
	0.522721	0.605889	0.269318		0.540907	0.630427	0.280806		0.385049	0.70281	0.310514		0.118455	0.760644	0.323108
	0.523212	0.606412	0.269602		0.541565	0.631105	0.281102		0.385065	0.703113	0.310842		0.118609	0.762289	0.323449
	0.523858	0.606557	0.269886		0.541723	0.631239	0.281398		0.385117	0.703243	0.311169		0.118726	0.762487	0.32379
	0.524095	0.606659	0.27017		0.543387	0.633591	0.281694		0.385507	0.703642	0.311497		0.118736	0.762686	0.324131
	0.525334	0.606837	0.270455		0.543544	0.634652	0.281991		0.386613	0.703966	0.311824		0.118867	0.763507	0.324472
	0.526498	0.606946	0.270739		0.543966	0.635003	0.282287		0.387235	0.704997	0.312152		0.118919	0.763789	0.324813
	0.526912	0.607483	0.271023		0.544582	0.635579	0.282583		0.387561	0.705741	0.31248		0.119073	0.763896	0.325153
	0.526935	0.607639	0.271307		0.544599	0.635669	0.282879		0.388017	0.706011	0.312807		0.119098	0.764349	0.325494
	0.528644	0.609424	0.271591		0.544799	0.636284	0.283175		0.388069	0.706076	0.313135		0.119468	0.764574	0.325835
	0.530004	0.6105	0.271875		0.544834	0.63647	0.283472		0.390101	0.706582	0.313462		0.119787	0.764737	0.326176
	0.530157	0.610633	0.272159		0.545298	0.636511	0.283768		0.390247	0.70672	0.31379		0.119897	0.764998	0.326517
	0.530558	0.610799	0.272443		0.546266	0.636867	0.284064		0.390299	0.707257	0.314117		0.119991	0.765083	0.326858
	0.531009	0.61088	0.272727		0.54629	0.637174	0.28436		0.390466	0.707893	0.314445		0.120116	0.765725	0.327198
	0.531335	0.611044	0.273011		0.546307	0.637455	0.284656		0.391368	0.70831	0.314772		0.120215	0.766139	0.327539
	0.531552	0.612337	0.273295		0.546482	0.637996	0.284953		0.391913	0.708939	0.3151		0.120243	0.767745	0.32788
	0.531651	0.61242	0.27358		0.54755	0.638357	0.285249		0.392113	0.709187	0.315427		0.120796	0.769964	0.328221
	0.531769	0.612618	0.273864		0.547927	0.638711	0.285545		0.392295	0.709867	0.315755		0.120811	0.770559	0.328562
	0.532331	0.612848	0.274148		0.548626	0.638969	0.285841		0.392298	0.710304	0.316083		0.121043	0.77256	0.328903
	0.53315	0.61348	0.274432		0.548986	0.639831	0.286137		0.392646	0.711288	0.31641		0.121228	0.772966	0.329243
	0.533242	0.614236	0.274716		0.549175	0.640131	0.286434		0.395334	0.711554	0.316738		0.121302	0.773496	0.329584
	0.533461	0.61447	0.275		0.549787	0.641414	0.28673		0.395658	0.7121	0.317065		0.12181	0.774954	0.329925
	0.533527	0.614818	0.275284		0.550267	0.641851	0.287026		0.396562	0.712772	0.317393		0.122044	0.775438	0.330266
	0.534176	0.614956	0.275568		0.550301	0.643245	0.287322		0.396821	0.712806	0.31772		0.122154	0.776068	0.330607
	0.534232	0.615386	0.275852		0.550752	0.643261	0.287618		0.39687	0.713994	0.318048		0.122391	0.776747	0.330948
	0.534812	0.61571	0.276136		0.551098	0.643771	0.287915		0.397611	0.714001	0.318375		0.122602	0.777549	0.331288
	0.535688	0.616503	0.27642		0.551934	0.644287	0.288211		0.397847	0.714702	0.318703		0.123077	0.778086	0.331629
	0.536753	0.616862	0.276705		0.551972	0.645733	0.288507		0.398287	0.714778	0.31903		0.123126	0.77814	0.33197
	0.537137	0.617019	0.276989		0.552034	0.645923	0.288803		0.398297	0.715821	0.319358		0.123243	0.779455	0.332311
	0.537289	0.617439	0.277273		0.553321	0.646041	0.2891		0.398316	0.717338	0.319686		0.123704	0.779918	0.332652
	0.53797	0.617536	0.277557		0.554019	0.647182	0.289396		0.398699	0.717903	0.320013		0.124077	0.78037	0.332993
	0.538089	0.617846	0.277841		0.554221	0.648144	0.289692		0.398901	0.718084	0.320341		0.124181	0.780651	0.333333
	0.538109	0.618588	0.278125		0.554516	0.648706	0.289988		0.399511	0.718891	0.320668		0.124227	0.781176	0.333674
	0.538402	0.618782	0.278409		0.554586	0.648798	0.290284		0.400037	0.719038	0.320996		0.12446	0.781735	0.334015
	0.539162	0.618937	0.278693		0.55498	0.648937	0.290581		0.400151	0.719628	0.321323		0.12467	0.782018	0.334356
	0.539433	0.619499	0.278977		0.555262	0.648988	0.290877		0.400773	0.719628	0.321651		0.124898	0.782765	0.334697
	0.539661	0.620426	0.279261		0.555448	0.649243	0.291173		0.401143	0.719836	0.321978		0.124907	0.783296	0.335037
	0.541378	0.620426	0.279545		0.556634	0.649244	0.291469		0.401473	0.720247	0.322306		0.124932	0.785602	0.335378
	0.541595	0.620565	0.27983		0.557024	0.649648	0.291765		0.401505	0.720255	0.322633		0.125635	0.785888	0.335719
	0.542282	0.620901	0.280114		0.557716	0.650743	0.292062		0.402436	0.721495	0.322961		0.126004	0.787469	0.33606
	0.542705	0.620945	0.280398		0.558154	0.652296	0.292358		0.402905	0.722382	0.323289		0.126066	0.78981	0.336401
	0.543736	0.620997	0.280682		0.55951	0.652434	0.292654		0.402921	0.722706	0.323616		0.126188	0.790193	0.336742
	0.543948	0.621139	0.280966		0.55983	0.652469	0.29295		0.402962	0.723472	0.323944		0.126206	0.790472	0.337082
	0.54648	0.621844	0.28125		0.559899	0.652547	0.293246		0.403244	0.724033	0.324271		0.126626	0.793482	0.337423
	0.547202	0.621963	0.281534		0.560044	0.652796	0.293543		0.403358	0.726658	0.324599		0.126678	0.793517	0.337764
	0.54722	0.622559	0.281818		0.560803	0.65311	0.293839		0.405728	0.728771	0.324926		0.12674	0.793761	0.338105
	0.547562	0.622656	0.282102		0.561001	0.653622	0.294135		0.406607	0.728955	0.325254		0.12691	0.794017	0.338446
	0.547722	0.6229	0.282386		0.561297	0.654083	0.294431		0.40679	0.730086	0.325581		0.127004	0.794399	0.338787
	0.550868	0.623093	0.28267		0.56227	0.654266	0.294727		0.407118	0.73042	0.325909		0.127935	0.79601	0.339127
	0.551512	0.623132	0.282955		0.562654	0.65447	0.295024		0.407571	0.730436	0.326236		0.12835	0.797121	0.339468
	0.553242	0.623411	0.283239		0.564892	0.654614	0.29532		0.407596	0.730454	0.326564		0.128549	0.798096	0.339809
	0.555586	0.623481	0.283523		0.565356	0.654821	0.295616		0.407774	0.730975	0.326892		0.128799	0.798154	0.34015
	0.555993	0.624209	0.283807		0.565424	0.65503	0.295912		0.407881	0.731057	0.327219		0.12906	0.798423	0.340491
	0.556168	0.624737	0.284091		0.565626	0.656494	0.296209		0.408253	0.731314	0.327547		0.129342	0.798429	0.340832
	0.557013	0.624917	0.284375		0.565719	0.657684	0.296505		0.409107	0.733104	0.327874		0.129425	0.798862	0.341172
	0.557831	0.62525	0.284659		0.56599	0.658472	0.296801		0.409653	0.73319	0.328202		0.129546	0.799108	0.341513
	0.559004	0.626245	0.284943		0.566238	0.658475	0.297097		0.409775	0.733203	0.328529		0.129574	0.800605	0.341854
	0.559004	0.626824	0.285227		0.568021	0.658769	0.297393		0.409914	0.733425	0.328857		0.129609	0.800609	0.342195
	0.559993	0.627814	0.285511		0.57029	0.659492	0.29769		0.410408	0.733786	0.329184		0.129715	0.800779	0.342536
	0.560171	0.629196	0.285795		0.570553	0.659762	0.297986		0.410731	0.734112	0.329512		0.130191	0.80253	0.342877
	0.56124	0.629745	0.28608		0.571754	0.660008	0.298282		0.410804	0.734525	0.32984		0.130296	0.807107	0.343217
	0.561274	0.629797	0.286364		0.572616	0.660236	0.298578		0.41111	0.734527	0.330167		0.130322	0.807209	0.343558
	0.561734	0.63061	0.286648		0.573238	0.660478	0.298874		0.411368	0.734792	0.330495		0.130461	0.80874	0.343899
	0.561779	0.631249	0.286932		0.573654	0.661277	0.299171		0.412778	0.735177	0.330822		0.130505	0.809638	0.34424
	0.562315	0.631345	0.287216		0.57445	0.661694	0.299467		0.412971	0.735898	0.33115		0.130513	0.810676	0.344581
	0.562701	0.631859	0.2875		0.575471	0.663493	0.299763		0.413068	0.736124	0.331477		0.130661	0.810927	0.344922
	0.562933	0.632345	0.287784		0.57561	0.663814	0.300059		0.413172	0.736384	0.331805		0.131011	0.812082	0.345262
	0.563466	0.632365	0.288068		0.57613	0.664344	0.300355		0.413706	0.73661	0.332132		0.131169	0.812324	0.345603
	0.564281	0.632513	0.288352		0.576327	0.664533	0.300652		0.414171	0.736686	0.33246		0.131293	0.812366	0.345944
	0.564739	0.632907	0.288636		0.577195	0.665195	0.300948		0.41499	0.736705	0.332787		0.132048	0.812542	0.346285
	0.565537	0.633149	0.28892		0.577968	0.665196	0.301244		0.415588	0.738049	0.333115		0.132255	0.81275	0.346626
	0.565642	0.633441	0.289205		0.578011	0.665575	0.30154		0.416403	0.738424	0.333443		0.132707	0.813414	0.346967
	0.565902	0.633657	0.289489		0.578488	0.665586	0.301836		0.417691	0.738918	0.33377		0.132772	0.81555	0.347307
	0.565965	0.634003	0.289773		0.578664	0.666119	0.302133		0.417719	0.739111	0.334098		0.132919	0.815644	0.347648
	0.566235	0.634306	0.290057		0.578982	0.666123	0.302429		0.418057	0.73915	0.334425		0.133165	0.816468	0.347989
	0.567971	0.635426	0.290341		0.579166	0.66752	0.302725		0.419184	0.740109	0.334753		0.133337	0.817384	0.34833
	0.56855	0.636537	0.290625		0.579474	0.668224	0.303021		0.419867	0.740267	0.33508		0.133387	0.818031	0.348671
	0.568614	0.637038	0.290909		0.579571	0.668954	0.303318		0.420031	0.741206	0.335408		0.133428	0.819617	0.349012
	0.56947	0.637321	0.291193		0.58034	0.669817	0.303614		0.420144	0.741386	0.335735		0.133499	0.821898	0.349352
	0.569632	0.637412	0.291477		0.580576	0.670132	0.30391		0.42032	0.74149	0.336063		0.133638	0.823212	0.349693
	0.569635	0.638041	0.291761		0.580682	0.673823	0.304206		0.420523	0.74263	0.33639		0.133895	0.823463	0.350034
	0.569676	0.638849	0.292045		0.580959	0.674704	0.304502		0.420615	0.743069	0.336718		0.133998	0.824649	0.350375
	0.570163	0.639261	0.29233		0.581131	0.674948	0.304799		0.421094	0.743446	0.337046		0.134027	0.824759	0.350716
	0.57126	0.639286	0.292614		0.581492	0.674987	0.305095		0.421759	0.744187	0.337373		0.13443	0.825206	0.351057
	0.574481	0.639498	0.292898		0.58179	0.675147	0.305391		0.421961	0.744267	0.337701		0.134668	0.825979	0.351397
	0.57519	0.639816	0.293182		0.583181	0.675167	0.305687		0.422649	0.744302	0.338028		0.134743	0.826021	0.351738
	0.575289	0.640097	0.293466		0.58325	0.675999	0.305983		0.423077	0.74506	0.338356		0.134901	0.826122	0.352079
	0.575539	0.64146	0.29375		0.583532	0.676227	0.30628		0.423756	0.745247	0.338683		0.134903	0.826574	0.35242
	0.575734	0.64162	0.294034		0.584513	0.677024	0.306576		0.423811	0.745793	0.339011		0.135076	0.826768	0.352761
	0.577001	0.641685	0.294318		0.584996	0.677553	0.306872		0.424028	0.746104	0.339338		0.135123	0.826771	0.353102
	0.577725	0.642398	0.294602		0.585332	0.678098	0.307168		0.425284	0.746807	0.339666		0.135274	0.826908	0.353442
	0.577854	0.643006	0.294886		0.585398	0.678126	0.307464		0.425579	0.747909	0.339993		0.135469	0.827182	0.353783
	0.57804	0.643167	0.29517		0.586825	0.678795	0.307761		0.425673	0.750029	0.340321		0.135894	0.827755	0.354124
	0.57853	0.643371	0.295455		0.587586	0.680052	0.308057		0.425716	0.750114	0.340649		0.135917	0.828785	0.354465
	0.578553	0.64475	0.295739		0.587958	0.680068	0.308353		0.426104	0.7506	0.340976		0.136155	0.82908	0.354806
	0.57927	0.645018	0.296023		0.588702	0.680926	0.308649		0.42613	0.751452	0.341304		0.136283	0.829268	0.355147
	0.580552	0.645048	0.296307		0.58884	0.68163	0.308945		0.426498	0.752027	0.341631		0.136363	0.82953	0.355487
	0.580623	0.645516	0.296591		0.589525	0.682008	0.309242		0.426735	0.752742	0.341959		0.136439	0.829796	0.355828
	0.581221	0.647167	0.296875		0.589529	0.682857	0.309538		0.427473	0.753402	0.342286		0.136484	0.830278	0.356169
	0.581325	0.647429	0.297159		0.589548	0.682916	0.309834		0.428245	0.753921	0.342614		0.136809	0.830281	0.35651
	0.58136	0.647634	0.297443		0.591097	0.683161	0.31013		0.429295	0.754301	0.342941		0.136973	0.832337	0.356851
	0.581593	0.647914	0.297727		0.59122	0.68344	0.310427		0.429451	0.754833	0.343269		0.137186	0.83268	0.357192
	0.581674	0.648308	0.298011		0.591393	0.684312	0.310723		0.430128	0.755028	0.343596		0.137554	0.833301	0.357532
	0.582377	0.648604	0.298295		0.591492	0.684552	0.311019		0.430344	0.755579	0.343924		0.137843	0.833394	0.357873
	0.582792	0.649228	0.29858		0.592113	0.685053	0.311315		0.430379	0.756773	0.344252		0.137918	0.834941	0.358214
	0.582792	0.649822	0.298864		0.59269	0.685324	0.311611		0.430805	0.757576	0.344579		0.138027	0.835092	0.358555
	0.58549	0.65138	0.299148		0.593603	0.68561	0.311908		0.430817	0.759489	0.344907		0.13804	0.835472	0.358896
	0.586257	0.651519	0.299432		0.595757	0.685646	0.312204		0.431478	0.760183	0.345234		0.138117	0.836019	0.359237
	0.586595	0.651654	0.299716		0.595972	0.685655	0.3125		0.431574	0.761067	0.345562		0.138338	0.836393	0.359577
	0.58683	0.653295	0.3		0.596308	0.686208	0.312796		0.431655	0.761591	0.345889		0.138356	0.837999	0.359918
	0.587859	0.654833	0.300284		0.596607	0.686214	0.313092		0.432219	0.763	0.346217		0.138368	0.838188	0.360259
	0.590938	0.655036	0.300568		0.596696	0.687104	0.313389		0.433621	0.763353	0.346544		0.138769	0.839057	0.3606
	0.590969	0.655116	0.300852		0.596823	0.687782	0.313685		0.434173	0.763518	0.346872		0.138798	0.840574	0.360941
	0.591013	0.655408	0.301136		0.597001	0.688733	0.313981		0.43446	0.765908	0.347199		0.139132	0.840892	0.361282
	0.591014	0.655854	0.30142		0.598251	0.689054	0.314277		0.435115	0.766123	0.347527		0.139241	0.841967	0.361622
	0.591101	0.656121	0.301705		0.598274	0.690009	0.314573		0.435895	0.766201	0.347855		0.139307	0.84267	0.361963
	0.592151	0.656383	0.301989		0.59903	0.690216	0.31487		0.43602	0.766266	0.348182		0.139401	0.843806	0.362304
	0.592429	0.657048	0.302273		0.599444	0.690245	0.315166		0.436085	0.766622	0.34851		0.139601	0.844222	0.362645
	0.592501	0.657154	0.302557		0.600466	0.690302	0.315462		0.436388	0.767075	0.348837		0.139644	0.844254	0.362986
	0.592597	0.657501	0.302841		0.60061	0.69051	0.315758		0.436884	0.768821	0.349165		0.139653	0.84531	0.363327
	0.592996	0.658198	0.303125		0.600652	0.690721	0.316055		0.437115	0.768885	0.349492		0.139688	0.846196	0.363667
	0.59379	0.658413	0.303409		0.601224	0.691071	0.316351		0.438992	0.770986	0.34982		0.139935	0.847427	0.364008
	0.593811	0.6585	0.303693		0.601228	0.692346	0.316647		0.440727	0.771369	0.350147		0.140308	0.847934	0.364349
	0.594119	0.658602	0.303977		0.602136	0.692587	0.316943		0.441762	0.772073	0.350475		0.140475	0.848014	0.36469
	0.59442	0.658856	0.304261		0.603893	0.692702	0.317239		0.441804	0.773219	0.350802		0.140584	0.848876	0.365031
	0.59451	0.659048	0.304545		0.605432	0.693897	0.317536		0.44229	0.773691	0.35113		0.14064	0.849029	0.365372
	0.594721	0.659928	0.30483		0.605905	0.694	0.317832		0.442573	0.774441	0.351458		0.140667	0.849872	0.365712
	0.594799	0.660096	0.305114		0.6061	0.694276	0.318128		0.443011	0.775657	0.351785		0.141043	0.850096	0.366053
	0.594834	0.660252	0.305398		0.606546	0.69518	0.318424		0.443098	0.776738	0.352113		0.141064	0.851481	0.366394
	0.595325	0.660352	0.305682		0.607603	0.695196	0.31872		0.443492	0.776829	0.35244		0.141357	0.851937	0.366735
	0.59553	0.660709	0.305966		0.608738	0.695238	0.319017		0.443615	0.77687	0.352768		0.14152	0.853315	0.367076
	0.598277	0.660717	0.30625		0.608877	0.695446	0.319313		0.444271	0.777244	0.353095		0.141641	0.853319	0.367416
	0.598707	0.660816	0.306534		0.608969	0.695956	0.319609		0.444461	0.777778	0.353423		0.141683	0.853394	0.367757
	0.598783	0.660915	0.306818		0.609275	0.696539	0.319905		0.444836	0.778931	0.35375		0.141726	0.853777	0.368098
	0.599197	0.661189	0.307102		0.609425	0.696542	0.320201		0.445632	0.78033	0.354078		0.141786	0.854208	0.368439
	0.5998	0.6614	0.307386		0.6098	0.696671	0.320498		0.446727	0.781198	0.354406		0.14188	0.854267	0.36878
	0.600198	0.661468	0.30767		0.610156	0.697643	0.320794		0.446825	0.781949	0.354733		0.142049	0.854428	0.369121
	0.600509	0.662012	0.307955		0.610157	0.697859	0.32109		0.447642	0.782541	0.355061		0.142467	0.854613	0.369461
	0.600594	0.662192	0.308239		0.612227	0.698754	0.321386		0.447893	0.783242	0.355388		0.142818	0.854898	0.369802
	0.600811	0.662707	0.308523		0.612809	0.698819	0.321682		0.448198	0.783549	0.355716		0.143068	0.856497	0.370143
	0.601112	0.662815	0.308807		0.615061	0.699791	0.321979		0.449591	0.784828	0.356043		0.143315	0.857835	0.370484
	0.601637	0.663046	0.309091		0.615219	0.699858	0.322275		0.449655	0.785299	0.356371		0.143349	0.857844	0.370825
	0.603123	0.663586	0.309375		0.61741	0.700178	0.322571		0.449766	0.785326	0.356698		0.143476	0.858175	0.371166
	0.603129	0.664163	0.309659		0.61746	0.700578	0.322867		0.44997	0.786543	0.357026		0.143512	0.858352	0.371506
	0.603148	0.665141	0.309943		0.617807	0.700741	0.323164		0.450059	0.786782	0.357353		0.144223	0.860016	0.371847
	0.604434	0.66516	0.310227		0.618428	0.702485	0.32346		0.45055	0.787452	0.357681		0.14479	0.860856	0.372188
	0.604512	0.665853	0.310511		0.618488	0.70314	0.323756		0.451667	0.787634	0.358009		0.1451	0.861458	0.372529
	0.604774	0.665919	0.310795		0.618837	0.70319	0.324052		0.451877	0.788305	0.358336		0.14523	0.861723	0.37287
	0.604805	0.666028	0.31108		0.618966	0.703819	0.324348		0.453462	0.789252	0.358664		0.145273	0.862437	0.373211
	0.604828	0.666266	0.311364		0.620325	0.704289	0.324645		0.453718	0.789341	0.358991		0.145447	0.862455	0.373551
	0.60645	0.666695	0.311648		0.621524	0.705621	0.324941		0.454324	0.789996	0.359319		0.145944	0.862895	0.373892
	0.608	0.667315	0.311932		0.621562	0.706197	0.325237		0.454391	0.790035	0.359646		0.146256	0.864348	0.374233
	0.608288	0.66762	0.312216		0.621763	0.706317	0.325533		0.454421	0.791291	0.359974		0.146412	0.864815	0.374574
	0.608744	0.668631	0.3125		0.622268	0.706616	0.325829		0.454958	0.791428	0.360301		0.146415	0.864928	0.374915
	0.610214	0.669012	0.312784		0.623189	0.707003	0.326126		0.455297	0.792664	0.360629		0.146422	0.865919	0.375256
	0.610473	0.669208	0.313068		0.623955	0.707465	0.326422		0.455563	0.792936	0.360956		0.146472	0.865947	0.375596
	0.610486	0.67061	0.313352		0.624845	0.707679	0.326718		0.45577	0.795559	0.361284		0.1467	0.866479	0.375937
	0.610643	0.670919	0.313636		0.625051	0.707908	0.327014		0.456265	0.795836	0.361612		0.146812	0.867168	0.376278
	0.610797	0.671167	0.31392		0.627149	0.707949	0.32731		0.456517	0.79736	0.361939		0.146843	0.867431	0.376619
	0.610942	0.67121	0.314205		0.627519	0.708389	0.327607		0.45711	0.797834	0.362267		0.146901	0.867448	0.37696
	0.610974	0.672082	0.314489		0.629123	0.709434	0.327903		0.457404	0.79801	0.362594		0.147157	0.868717	0.377301
	0.611405	0.673708	0.314773		0.629448	0.709595	0.328199		0.458051	0.798095	0.362922		0.147583	0.870091	0.377641
	0.611835	0.674301	0.315057		0.629707	0.71008	0.328495		0.458098	0.798245	0.363249		0.147629	0.870456	0.377982
	0.612577	0.674942	0.315341		0.630736	0.710474	0.328791		0.458264	0.79918	0.363577		0.14778	0.870991	0.378323
	0.612655	0.675662	0.315625		0.631027	0.711262	0.329088		0.458963	0.799296	0.363904		0.147817	0.871088	0.378664
	0.613406	0.675891	0.315909		0.631246	0.712139	0.329384		0.459553	0.802454	0.364232		0.147876	0.873109	0.379005
	0.613771	0.676192	0.316193		0.631309	0.713125	0.32968		0.459969	0.80247	0.364559		0.147957	0.873409	0.379346
	0.614229	0.676196	0.316477		0.633615	0.713866	0.329976		0.460541	0.802499	0.364887		0.148508	0.874345	0.379686
	0.615219	0.676251	0.316761		0.634814	0.714135	0.330273		0.461946	0.803514	0.365215		0.148511	0.874896	0.380027
	0.615547	0.676359	0.317045		0.635516	0.714228	0.330569		0.462054	0.805136	0.365542		0.148519	0.875561	0.380368
	0.616149	0.677234	0.31733		0.636128	0.714796	0.330865		0.462162	0.806782	0.36587		0.148792	0.875783	0.380709
	0.616303	0.677524	0.317614		0.636379	0.715371	0.331161		0.46249	0.807421	0.366197		0.149263	0.87598	0.38105
	0.616517	0.677528	0.317898		0.636399	0.716864	0.331457		0.46254	0.807655	0.366525		0.149316	0.876353	0.381391
	0.617096	0.678105	0.318182		0.636551	0.716879	0.331754		0.462688	0.807844	0.366852		0.14959	0.876448	0.381731
	0.617203	0.678733	0.318466		0.636635	0.717105	0.33205		0.463131	0.808051	0.36718		0.149747	0.876573	0.382072
	0.617351	0.679592	0.31875		0.637003	0.717468	0.332346		0.463366	0.808059	0.367507		0.149762	0.877048	0.382413
	0.618604	0.679613	0.319034		0.637472	0.717503	0.332642		0.463794	0.808208	0.367835		0.149816	0.877513	0.382754
	0.619242	0.679919	0.319318		0.637565	0.717869	0.332938		0.463902	0.808267	0.368162		0.149846	0.877619	0.383095
	0.619865	0.680965	0.319602		0.637937	0.719102	0.333235		0.464495	0.808529	0.36849		0.1501	0.879539	0.383436
	0.619973	0.681202	0.319886		0.63796	0.71936	0.333531		0.464551	0.808544	0.368818		0.150428	0.881146	0.383776
	0.620282	0.681619	0.32017		0.638272	0.71939	0.333827		0.464917	0.808584	0.369145		0.150483	0.881567	0.384117
	0.620475	0.681701	0.320455		0.638806	0.7198	0.334123		0.465179	0.809782	0.369473		0.150762	0.881919	0.384458
	0.621225	0.681741	0.320739		0.639687	0.719848	0.334419		0.465429	0.810489	0.3698		0.150831	0.882185	0.384799
	0.621976	0.682361	0.321023		0.639909	0.719951	0.334716		0.465491	0.810538	0.370128		0.150935	0.882634	0.38514
	0.622259	0.68237	0.321307		0.64202	0.719973	0.335012		0.465745	0.811891	0.370455		0.150938	0.883176	0.385481
	0.622292	0.684435	0.321591		0.642266	0.720155	0.335308		0.465786	0.812102	0.370783		0.150981	0.883275	0.385821
	0.62242	0.685909	0.321875		0.642281	0.72033	0.335604		0.467203	0.812722	0.37111		0.151184	0.883549	0.386162
	0.623952	0.686272	0.322159		0.643767	0.720449	0.3359		0.469761	0.813563	0.371438		0.151218	0.883606	0.386503
	0.624001	0.687662	0.322443		0.643832	0.721277	0.336197		0.469779	0.81357	0.371765		0.151559	0.88379	0.386844
	0.624658	0.687885	0.322727		0.644068	0.721862	0.336493		0.469921	0.814267	0.372093		0.151713	0.88404	0.387185
	0.624985	0.687914	0.323011		0.64496	0.723723	0.336789		0.470975	0.814888	0.372421		0.152057	0.885472	0.387526
	0.625043	0.688841	0.323295		0.645467	0.725776	0.337085		0.472345	0.816801	0.372748		0.152078	0.886183	0.387866
	0.62653	0.688946	0.32358		0.645975	0.725885	0.337382		0.47263	0.817586	0.373076		0.1521	0.886758	0.388207
	0.627009	0.690205	0.323864		0.649167	0.726268	0.337678		0.472981	0.818296	0.373403		0.152134	0.887186	0.388548
	0.627455	0.69045	0.324148		0.650036	0.726692	0.337974		0.474932	0.81865	0.373731		0.152337	0.887692	0.388889
	0.627778	0.690625	0.324432		0.650762	0.727451	0.33827		0.475165	0.819268	0.374058		0.152487	0.887894	0.38923
	0.629691	0.690883	0.324716		0.651368	0.7284	0.338566		0.4754	0.819419	0.374386		0.152646	0.888517	0.389571
	0.632222	0.692133	0.325		0.652132	0.728523	0.338863		0.475985	0.819772	0.374713		0.152737	0.890043	0.389911
	0.632237	0.692142	0.325284		0.652611	0.728636	0.339159		0.476068	0.820231	0.375041		0.152839	0.891599	0.390252
	0.633226	0.693818	0.325568		0.65356	0.728771	0.339455		0.477571	0.820271	0.375368		0.153435	0.891758	0.390593
	0.633808	0.693933	0.325852		0.653752	0.728824	0.339751		0.477843	0.821479	0.375696		0.15346	0.891764	0.390934
	0.633823	0.694006	0.326136		0.654461	0.729747	0.340047		0.477908	0.821487	0.376024		0.153527	0.891812	0.391275
	0.633837	0.694223	0.32642		0.65549	0.731068	0.340344		0.479601	0.821826	0.376351		0.153571	0.891903	0.391616
	0.635137	0.695037	0.326705		0.655636	0.73114	0.34064		0.479798	0.82339	0.376679		0.153577	0.892273	0.391956
	0.637199	0.695253	0.326989		0.65603	0.731976	0.340936		0.48112	0.82367	0.377006		0.15367	0.892377	0.392297
	0.637504	0.695272	0.327273		0.65616	0.732117	0.341232		0.481682	0.823785	0.377334		0.153872	0.892981	0.392638
	0.637997	0.695409	0.327557		0.657604	0.73269	0.341528		0.481898	0.823871	0.377661		0.154049	0.893677	0.392979
	0.63801	0.696692	0.327841		0.657968	0.732795	0.341825		0.481973	0.825414	0.377989		0.154223	0.89371	0.39332
	0.63862	0.69808	0.328125		0.658525	0.733227	0.342121		0.482119	0.825931	0.378316		0.154313	0.894401	0.393661
	0.638848	0.698258	0.328409		0.658883	0.733345	0.342417		0.482134	0.826638	0.378644		0.15469	0.89442	0.394001
	0.638924	0.698378	0.328693		0.659483	0.733397	0.342713		0.48302	0.827168	0.378972		0.154916	0.894434	0.394342
	0.639255	0.698471	0.328977		0.660148	0.73356	0.343009		0.483986	0.827333	0.379299		0.155078	0.895318	0.394683
	0.639548	0.69852	0.329261		0.660693	0.733851	0.343306		0.484263	0.828917	0.379627		0.155427	0.895845	0.395024
	0.639562	0.698808	0.329545		0.660879	0.73465	0.343602		0.484623	0.829126	0.379954		0.155501	0.895952	0.395365
	0.640042	0.699029	0.32983		0.662308	0.735334	0.343898		0.485619	0.829466	0.380282		0.155557	0.896054	0.395706
	0.643698	0.699197	0.330114		0.662633	0.73549	0.344194		0.486291	0.830982	0.380609		0.155568	0.89646	0.396046
	0.643804	0.699418	0.330398		0.665176	0.735745	0.344491		0.486906	0.831793	0.380937		0.155595	0.89692	0.396387
	0.643991	0.699968	0.330682		0.665817	0.736105	0.344787		0.487108	0.832413	0.381264		0.155819	0.897792	0.396728
	0.644393	0.700219	0.330966		0.665845	0.736138	0.345083		0.487117	0.832419	0.381592		0.155838	0.897834	0.397069
	0.644723	0.700329	0.33125		0.666322	0.737125	0.345379		0.487607	0.833022	0.381919		0.156007	0.898274	0.39741
	0.645345	0.700428	0.331534		0.666923	0.738217	0.345675		0.487961	0.833047	0.382247		0.156144	0.899261	0.397751
	0.645486	0.700497	0.331818		0.668541	0.73842	0.345972		0.488083	0.833145	0.382575		0.156368	0.899428	0.398091
	0.645501	0.700698	0.332102		0.668681	0.738788	0.346268		0.488289	0.833892	0.382902		0.156524	0.899974	0.398432
	0.645638	0.700748	0.332386		0.66977	0.739872	0.346564		0.488643	0.835314	0.38323		0.156531	0.900243	0.398773
	0.646582	0.700779	0.33267		0.670034	0.740625	0.34686		0.488741	0.835432	0.383557		0.156701	0.900355	0.399114
	0.646584	0.700869	0.332955		0.671244	0.740703	0.347156		0.489133	0.835507	0.383885		0.156759	0.901068	0.399455
	0.64666	0.701659	0.333239		0.671699	0.740791	0.347453		0.489461	0.835672	0.384212		0.157017	0.901546	0.399796
	0.647108	0.702172	0.333523		0.67184	0.740954	0.347749		0.48968	0.83585	0.38454		0.157208	0.901849	0.400136
	0.647405	0.702212	0.333807		0.672001	0.741812	0.348045		0.490466	0.835967	0.384867		0.157394	0.902116	0.400477
	0.647957	0.702791	0.334091		0.672454	0.742752	0.348341		0.490529	0.836473	0.385195		0.157406	0.902167	0.400818
	0.648772	0.703401	0.334375		0.675168	0.742996	0.348637		0.490635	0.837406	0.385522		0.15745	0.903096	0.401159
	0.648987	0.703438	0.334659		0.675237	0.743836	0.348934		0.492171	0.839032	0.38585		0.157473	0.905533	0.4015
	0.649505	0.704678	0.334943		0.676605	0.744243	0.34923		0.492814	0.839315	0.386178		0.157567	0.906385	0.40184
	0.650073	0.705134	0.335227		0.677087	0.745269	0.349526		0.492887	0.840343	0.386505		0.157826	0.907892	0.402181
	0.650188	0.705474	0.335511		0.67779	0.745509	0.349822		0.493014	0.84166	0.386833		0.157948	0.910599	0.402522
	0.650758	0.705554	0.335795		0.677912	0.746007	0.350118		0.494525	0.841987	0.38716		0.15796	0.910847	0.402863
	0.650783	0.705573	0.33608		0.677985	0.746378	0.350415		0.494951	0.84224	0.387488		0.158051	0.911357	0.403204
	0.650984	0.70585	0.336364		0.678178	0.747057	0.350711		0.495839	0.842411	0.387815		0.158057	0.911452	0.403545
	0.651075	0.705965	0.336648		0.678245	0.747282	0.351007		0.495978	0.842694	0.388143		0.158129	0.913075	0.403885
	0.65166	0.706354	0.336932		0.679122	0.748217	0.351303		0.496944	0.842974	0.38847		0.158187	0.913094	0.404226
	0.651751	0.706643	0.337216		0.67927	0.748247	0.3516		0.497558	0.845342	0.388798		0.158338	0.913835	0.404567
	0.652156	0.706674	0.3375		0.679844	0.748406	0.351896		0.498067	0.845679	0.389125		0.158435	0.913874	0.404908
	0.653333	0.706714	0.337784		0.680193	0.749002	0.352192		0.499469	0.846409	0.389453		0.159108	0.916698	0.405249
	0.653338	0.706729	0.338068		0.680923	0.749807	0.352488		0.499809	0.847895	0.389781		0.159422	0.917731	0.40559
	0.654493	0.706789	0.338352		0.681289	0.749927	0.352784		0.499961	0.848478	0.390108		0.159751	0.918111	0.40593
	0.655108	0.707464	0.338636		0.681743	0.75012	0.353081		0.499975	0.848573	0.390436		0.159836	0.91812	0.406271
	0.655293	0.707712	0.33892		0.682548	0.750303	0.353377		0.501269	0.84873	0.390763		0.159976	0.918674	0.406612
	0.655445	0.70852	0.339205		0.682729	0.751046	0.353673		0.502363	0.848923	0.391091		0.160277	0.919072	0.406953
	0.655629	0.709183	0.339489		0.682741	0.751195	0.353969		0.505063	0.849685	0.391418		0.160326	0.919192	0.407294
	0.655867	0.709413	0.339773		0.683227	0.751398	0.354265		0.506437	0.850287	0.391746		0.160525	0.919815	0.407635
	0.656401	0.709774	0.340057		0.684007	0.752275	0.354562		0.506852	0.850404	0.392073		0.160866	0.920661	0.407975
	0.656676	0.710295	0.340341		0.685625	0.75237	0.354858		0.507256	0.850463	0.392401		0.161477	0.92114	0.408316
	0.657882	0.710468	0.340625		0.686029	0.752499	0.355154		0.507318	0.85103	0.392728		0.161541	0.921437	0.408657
	0.658107	0.710519	0.340909		0.686427	0.752537	0.35545		0.508356	0.85109	0.393056		0.161561	0.922279	0.408998
	0.658166	0.711186	0.341193		0.686886	0.753621	0.355746		0.509107	0.851619	0.393384		0.161807	0.922605	0.409339
	0.658379	0.711469	0.341477		0.687001	0.754035	0.356043		0.510543	0.85183	0.393711		0.16182	0.923233	0.40968
	0.658597	0.711556	0.341761		0.68712	0.754793	0.356339		0.510856	0.852898	0.394039		0.162004	0.92353	0.41002
	0.6587	0.712306	0.342045		0.687873	0.756603	0.356635		0.511354	0.853511	0.394366		0.163033	0.924178	0.410361
	0.659009	0.712487	0.34233		0.689215	0.756622	0.356931		0.511847	0.853643	0.394694		0.163107	0.924223	0.410702
	0.659218	0.713164	0.342614		0.689516	0.756916	0.357227		0.512324	0.853962	0.395021		0.163171	0.926131	0.411043
	0.659616	0.71347	0.342898		0.689942	0.756955	0.357524		0.512553	0.855118	0.395349		0.163845	0.926477	0.411384
	0.660415	0.71446	0.343182		0.69003	0.757812	0.35782		0.512644	0.855252	0.395676		0.163895	0.926545	0.411725
	0.660728	0.714692	0.343466		0.690766	0.758019	0.358116		0.512847	0.855392	0.396004		0.164055	0.92671	0.412065
	0.660997	0.715354	0.34375		0.691402	0.758581	0.358412		0.513017	0.855773	0.396331		0.164403	0.92808	0.412406
	0.661315	0.716068	0.344034		0.691422	0.759052	0.358709		0.513048	0.856499	0.396659		0.164777	0.928222	0.412747
	0.662797	0.716164	0.344318		0.691455	0.759306	0.359005		0.515041	0.858177	0.396987		0.164936	0.928381	0.413088
	0.664171	0.716207	0.344602		0.691655	0.760242	0.359301		0.515226	0.86081	0.397314		0.164997	0.928671	0.413429
	0.664216	0.716796	0.344886		0.692225	0.760444	0.359597		0.515802	0.860811	0.397642		0.165114	0.92872	0.41377
	0.664662	0.717053	0.34517		0.693113	0.761979	0.359893		0.516044	0.861194	0.397969		0.165272	0.928823	0.41411
	0.664677	0.718068	0.345455		0.693417	0.762078	0.36019		0.516069	0.862752	0.398297		0.165378	0.928976	0.414451
	0.665056	0.718356	0.345739		0.69342	0.762272	0.360486		0.51702	0.862785	0.398624		0.165453	0.929111	0.414792
	0.666015	0.718763	0.346023		0.694017	0.762625	0.360782		0.518649	0.862832	0.398952		0.166143	0.92978	0.415133
	0.666189	0.718851	0.346307		0.69408	0.762838	0.361078		0.518995	0.863414	0.399279		0.166386	0.930194	0.415474
	0.66646	0.718884	0.346591		0.694091	0.763938	0.361374		0.519699	0.864214	0.399607		0.166456	0.930349	0.415815
	0.666666	0.720024	0.346875		0.694364	0.764932	0.361671		0.520081	0.864365	0.399934		0.166523	0.931314	0.416155
	0.666713	0.720104	0.347159		0.695524	0.765126	0.361967		0.520429	0.86466	0.400262		0.166804	0.931388	0.416496
	0.666726	0.720244	0.347443		0.695947	0.766019	0.362263		0.520432	0.864675	0.40059		0.166805	0.932333	0.416837
	0.667571	0.72096	0.347727		0.696389	0.766668	0.362559		0.520759	0.864694	0.400917		0.166863	0.932563	0.417178
	0.667606	0.721495	0.348011		0.697116	0.766983	0.362855		0.522178	0.864719	0.401245		0.167033	0.933549	0.417519
	0.667626	0.721699	0.348295		0.697201	0.766995	0.363152		0.524299	0.864978	0.401572		0.167196	0.933645	0.41786
	0.669368	0.722789	0.34858		0.69841	0.767024	0.363448		0.524427	0.865986	0.4019		0.167381	0.934387	0.4182
	0.669629	0.723053	0.348864		0.699573	0.767408	0.363744		0.524602	0.866091	0.402227		0.167537	0.935389	0.418541
	0.669854	0.723171	0.349148		0.700248	0.767853	0.36404		0.524708	0.867722	0.402555		0.16763	0.935784	0.418882
	0.670262	0.723217	0.349432		0.700485	0.769105	0.364336		0.524898	0.868281	0.402882		0.167718	0.936103	0.419223
	0.670748	0.723244	0.349716		0.701352	0.76933	0.364633		0.524926	0.868618	0.40321		0.167789	0.938766	0.419564
	0.6715	0.724152	0.35		0.701765	0.769348	0.364929		0.525024	0.86893	0.403538		0.167789	0.939068	0.419905
	0.671679	0.724562	0.350284		0.702809	0.769746	0.365225		0.525201	0.869424	0.403865		0.167838	0.939759	0.420245
	0.671956	0.725103	0.350568		0.703724	0.769753	0.365521		0.525258	0.869579	0.404193		0.168065	0.940197	0.420586
	0.672235	0.725514	0.350852		0.704815	0.769954	0.365818		0.525881	0.869735	0.40452		0.168461	0.940538	0.420927
	0.672582	0.72565	0.351136		0.705181	0.770858	0.366114		0.526141	0.870454	0.404848		0.1685	0.941021	0.421268
	0.673065	0.726334	0.35142		0.705774	0.770994	0.36641		0.526327	0.870517	0.405175		0.168685	0.941207	0.421609
	0.673183	0.726915	0.351705		0.706123	0.771177	0.366706		0.526524	0.87082	0.405503		0.168813	0.941955	0.42195
	0.673662	0.727299	0.351989		0.707312	0.771629	0.367002		0.526841	0.871106	0.40583		0.168848	0.944342	0.42229
	0.675397	0.727396	0.352273		0.708018	0.772216	0.367299		0.527398	0.872661	0.406158		0.168875	0.94487	0.422631
	0.675821	0.72753	0.352557		0.708942	0.772221	0.367595		0.527833	0.873698	0.406485		0.168913	0.945568	0.422972
	0.675828	0.727923	0.352841		0.709379	0.772238	0.367891		0.5284	0.87387	0.406813		0.169173	0.945666	0.423313
	0.676212	0.728549	0.353125		0.710456	0.772493	0.368187		0.530156	0.873931	0.407141		0.169342	0.946218	0.423654
	0.676343	0.728917	0.353409		0.710502	0.772506	0.368483		0.530231	0.875508	0.407468		0.169421	0.947251	0.423995
	0.676692	0.729285	0.353693		0.711726	0.773239	0.36878		0.530531	0.876646	0.407796		0.169425	0.947562	0.424335
	0.67676	0.730042	0.353977		0.712056	0.773608	0.369076		0.531192	0.877219	0.408123		0.169695	0.948437	0.424676
	0.67895	0.730425	0.354261		0.713494	0.774009	0.369372		0.531898	0.877247	0.408451		0.170632	0.949273	0.425017
	0.679517	0.731743	0.354545		0.713708	0.774036	0.369668		0.532333	0.878881	0.408778		0.17064	0.949747	0.425358
	0.679631	0.731913	0.35483		0.713889	0.774088	0.369964		0.532346	0.882203	0.409106		0.170648	0.949952	0.425699
	0.680966	0.731994	0.355114		0.714866	0.774547	0.370261		0.532487	0.882406	0.409433		0.17075	0.950056	0.42604
	0.68125	0.732472	0.355398		0.714906	0.774652	0.370557		0.532616	0.883009	0.409761		0.170964	0.950498	0.42638
	0.681462	0.733331	0.355682		0.715353	0.775616	0.370853		0.533733	0.883622	0.410088		0.17124	0.952312	0.426721
	0.681923	0.733389	0.355966		0.71578	0.777052	0.371149		0.533907	0.883941	0.410416		0.171678	0.952419	0.427062
	0.681961	0.733597	0.35625		0.717938	0.777398	0.371445		0.534368	0.885567	0.410744		0.171845	0.952849	0.427403
	0.682159	0.733764	0.356534		0.717978	0.777453	0.371742		0.534914	0.885649	0.411071		0.17189	0.953294	0.427744
	0.682196	0.733774	0.356818		0.718768	0.778212	0.372038		0.535572	0.885871	0.411399		0.172513	0.955057	0.428085
	0.682795	0.733857	0.357102		0.719016	0.778391	0.372334		0.535795	0.887958	0.411726		0.172667	0.955722	0.428425
	0.683525	0.734669	0.357386		0.719169	0.778521	0.37263		0.536168	0.888295	0.412054		0.172686	0.956015	0.428766
	0.683681	0.735008	0.35767		0.720516	0.77854	0.372927		0.536632	0.889149	0.412381		0.173795	0.956434	0.429107
	0.684105	0.735265	0.357955		0.720753	0.780061	0.373223		0.536743	0.88927	0.412709		0.173985	0.956769	0.429448
	0.684376	0.736052	0.358239		0.720827	0.780161	0.373519		0.537971	0.890952	0.413036		0.174236	0.957131	0.429789
	0.685666	0.736772	0.358523		0.720835	0.781194	0.373815		0.538588	0.891518	0.413364		0.174321	0.9573	0.43013
	0.688631	0.737361	0.358807		0.721027	0.781726	0.374111		0.53898	0.891602	0.413691		0.17483	0.957351	0.43047
	0.689398	0.737661	0.359091		0.721037	0.78174	0.374408		0.539267	0.891995	0.414019		0.174878	0.957755	0.430811
	0.689433	0.737917	0.359375		0.721246	0.783311	0.374704		0.539308	0.892129	0.414347		0.175061	0.958198	0.431152
	0.689448	0.738047	0.359659		0.721277	0.784165	0.375		0.539451	0.89262	0.414674		0.175268	0.959359	0.431493
	0.689996	0.739259	0.359943		0.721392	0.784503	0.375296		0.539777	0.892872	0.415002		0.175396	0.959505	0.431834
	0.690379	0.739538	0.360227		0.721822	0.7865	0.375592		0.540477	0.896392	0.415329		0.175425	0.960354	0.432175
	0.690439	0.73989	0.360511		0.721905	0.787275	0.375889		0.540578	0.898582	0.415657		0.17566	0.960627	0.432515
	0.690676	0.740849	0.360795		0.722217	0.788008	0.376185		0.540667	0.901645	0.415984		0.175744	0.9607	0.432856
	0.691759	0.741498	0.36108		0.723068	0.788342	0.376481		0.540708	0.902219	0.416312		0.175852	0.961714	0.433197
	0.691948	0.742122	0.361364		0.723424	0.788386	0.376777		0.541094	0.902656	0.416639		0.176047	0.962121	0.433538
	0.692057	0.742173	0.361648		0.724046	0.788658	0.377073		0.541138	0.902999	0.416967		0.176119	0.962475	0.433879
	0.69228	0.742265	0.361932		0.724212	0.788693	0.37737		0.541313	0.903931	0.417294		0.176122	0.962716	0.434219
	0.692327	0.742375	0.362216		0.724869	0.789035	0.377666		0.541839	0.90406	0.417622		0.17628	0.96357	0.43456
	0.693202	0.742417	0.3625		0.724917	0.789509	0.377962		0.542022	0.904153	0.41795		0.176359	0.96468	0.434901
	0.693253	0.74334	0.362784		0.725268	0.790474	0.378258		0.54365	0.905821	0.418277		0.17646	0.964885	0.435242
	0.693517	0.743698	0.363068		0.725531	0.791038	0.378555		0.543682	0.906615	0.418605		0.176743	0.965464	0.435583
	0.693636	0.743732	0.363352		0.726083	0.791085	0.378851		0.544503	0.906781	0.418932		0.177601	0.965541	0.435924
	0.693657	0.744262	0.363636		0.727893	0.791939	0.379147		0.544861	0.906793	0.41926		0.177756	0.966025	0.436264
	0.695565	0.744353	0.36392		0.728291	0.791976	0.379443		0.545583	0.907815	0.419587		0.177835	0.967593	0.436605
	0.695869	0.744396	0.364205		0.729237	0.792782	0.379739		0.545953	0.90792	0.419915		0.177914	0.967733	0.436946
	0.695984	0.744802	0.364489		0.733055	0.795129	0.380036		0.545956	0.908609	0.420242		0.177921	0.967909	0.437287
	0.696491	0.744957	0.364773		0.733172	0.796769	0.380332		0.546037	0.909321	0.42057		0.177998	0.967951	0.437628
	0.696531	0.744999	0.365057		0.734987	0.797408	0.380628		0.546037	0.909467	0.420897		0.178191	0.968727	0.437969
	0.697096	0.745153	0.365341		0.735127	0.79744	0.380924		0.546107	0.911309	0.421225		0.178336	0.969265	0.438309
	0.697523	0.745578	0.365625		0.735517	0.797703	0.38122		0.546527	0.911584	0.421553		0.178629	0.970229	0.43865
	0.698673	0.745877	0.365909		0.735529	0.797846	0.381517		0.54701	0.91162	0.42188		0.178638	0.970424	0.438991
	0.698885	0.747175	0.366193		0.735681	0.797855	0.381813		0.547609	0.911919	0.422208		0.178656	0.971654	0.439332
	0.699369	0.747837	0.366477		0.735735	0.7979	0.382109		0.547715	0.912796	0.422535		0.178772	0.97315	0.439673
	0.700276	0.749093	0.366761		0.736631	0.798785	0.382405		0.547721	0.912805	0.422863		0.178776	0.974798	0.440014
	0.700508	0.749429	0.367045		0.736873	0.798988	0.382701		0.54825	0.913282	0.42319		0.17893	0.975703	0.440354
	0.701063	0.749474	0.36733		0.737962	0.800098	0.382998		0.548256	0.913952	0.423518		0.178984	0.977399	0.440695
	0.701866	0.75031	0.367614		0.738162	0.800693	0.383294		0.549083	0.914519	0.423845		0.179188	0.977786	0.441036
	0.702055	0.750586	0.367898		0.738276	0.800748	0.38359		0.549483	0.914821	0.424173		0.179642	0.977805	0.441377
	0.703902	0.750841	0.368182		0.738485	0.800826	0.383886		0.550405	0.915125	0.4245		0.179874	0.977894	0.441718
	0.704581	0.750988	0.368466		0.739254	0.801046	0.384182		0.551297	0.915928	0.424828		0.179936	0.978661	0.442059
	0.704658	0.751104	0.36875		0.739266	0.801135	0.384479		0.551673	0.917318	0.425156		0.180144	0.979571	0.442399
	0.704887	0.751113	0.369034		0.739589	0.801151	0.384775		0.552098	0.917418	0.425483		0.180618	0.979722	0.44274
	0.706128	0.751621	0.369318		0.739692	0.802265	0.385071		0.552759	0.917852	0.425811		0.180713	0.979793	0.443081
	0.706467	0.751989	0.369602		0.741838	0.802348	0.385367		0.552848	0.918156	0.426138		0.180743	0.979973	0.443422
	0.706779	0.752251	0.369886		0.74246	0.803233	0.385664		0.553221	0.918366	0.426466		0.180952	0.980088	0.443763
	0.708849	0.752457	0.37017		0.744203	0.803932	0.38596		0.553667	0.918862	0.426793		0.181655	0.980257	0.444104
	0.709975	0.752899	0.370455		0.744604	0.805231	0.386256		0.554562	0.91941	0.427121		0.181785	0.980363	0.444444
	0.709979	0.753262	0.370739		0.745183	0.805365	0.386552		0.554572	0.920097	0.427448		0.181857	0.981056	0.444785
	0.710454	0.753284	0.371023		0.745272	0.805377	0.386848		0.554953	0.920598	0.427776		0.181897	0.981648	0.445126
	0.710547	0.754159	0.371307		0.745734	0.806799	0.387145		0.555119	0.921038	0.428104		0.181904	0.982477	0.445467
	0.711608	0.754263	0.371591		0.745905	0.806863	0.387441		0.556567	0.921258	0.428431		0.182109	0.982669	0.445808
	0.712448	0.754815	0.371875		0.748016	0.807643	0.387737		0.557013	0.922927	0.428759		0.182245	0.984351	0.446149
	0.712487	0.755494	0.372159		0.748084	0.807698	0.388033		0.557037	0.923381	0.429086		0.182379	0.985484	0.446489
	0.712685	0.756186	0.372443		0.748314	0.809051	0.388329		0.557613	0.924441	0.429414		0.182384	0.985509	0.44683
	0.712915	0.757049	0.372727		0.749308	0.809643	0.388626		0.557941	0.925865	0.429741		0.182431	0.987216	0.447171
	0.714351	0.757441	0.373011		0.750509	0.810233	0.388922		0.558005	0.926525	0.430069		0.182607	0.987663	0.447512
	0.714637	0.758438	0.373295		0.751508	0.810243	0.389218		0.558256	0.9266	0.430396		0.182645	0.988088	0.447853
	0.714845	0.758477	0.37358		0.752213	0.810922	0.389514		0.558378	0.926713	0.430724		0.182748	0.988392	0.448194
	0.714993	0.758725	0.373864		0.752301	0.811686	0.38981		0.559961	0.927796	0.431051		0.183107	0.989431	0.448534
	0.715293	0.759359	0.374148		0.752969	0.811832	0.390107		0.561062	0.929993	0.431379		0.183145	0.989556	0.448875
	0.715724	0.759667	0.374432		0.753241	0.812214	0.390403		0.56115	0.931051	0.431707		0.183279	0.990593	0.449216
	0.715902	0.760194	0.374716		0.753983	0.812942	0.390699		0.561296	0.931343	0.432034		0.183401	0.991987	0.449557
	0.71633	0.76072	0.375		0.754018	0.813854	0.390995		0.561348	0.931718	0.432362		0.183673	0.992582	0.449898
	0.716331	0.76077	0.375284		0.754313	0.814577	0.391291		0.561994	0.933673	0.432689		0.184078	0.992987	0.450239
	0.717767	0.761443	0.375568		0.755942	0.815546	0.391588		0.562895	0.933944	0.433017		0.184299	0.993089	0.450579
	0.718044	0.761598	0.375852		0.756742	0.815799	0.391884		0.562926	0.934072	0.433344		0.18461	0.993388	0.45092
	0.718632	0.761609	0.376136		0.756976	0.816202	0.39218		0.563067	0.934094	0.433672		0.184638	0.99379	0.451261
	0.718861	0.761774	0.37642		0.75712	0.818169	0.392476		0.563207	0.934318	0.433999		0.184678	0.994232	0.451602
	0.718911	0.76386	0.376705		0.757303	0.819285	0.392773		0.563208	0.934949	0.434327		0.184886	0.994233	0.451943
	0.718994	0.764379	0.376989		0.758613	0.819803	0.393069		0.564285	0.936983	0.434654		0.185438	0.994644	0.452284
	0.719298	0.764469	0.377273		0.759055	0.820965	0.393365		0.565166	0.938428	0.434982		0.18548	0.994883	0.452624
	0.719389	0.765406	0.377557		0.759233	0.821157	0.393661		0.565402	0.938867	0.43531		0.185594	0.995067	0.452965
	0.721182	0.765543	0.377841		0.76059	0.822083	0.393957		0.566231	0.940856	0.435637		0.185614	0.997101	0.453306
	0.721323	0.765765	0.378125		0.760804	0.823163	0.394254		0.566863	0.941217	0.435965		0.185666	0.99741	0.453647
	0.722025	0.765975	0.378409		0.762087	0.823587	0.39455		0.56753	0.941511	0.436292		0.185791	0.997474	0.453988
	0.722644	0.766025	0.378693		0.762267	0.823588	0.394846		0.567952	0.942101	0.43662		0.186129	0.997779	0.454329
	0.723424	0.766571	0.378977		0.763376	0.823808	0.395142		0.568714	0.942649	0.436947		0.186147	0.999621	0.454669
	0.72509	0.767607	0.379261		0.763447	0.824147	0.395438		0.568978	0.942944	0.437275		0.186423	0.99965	0.45501
	0.725429	0.767641	0.379545		0.764674	0.824249	0.395735		0.569047	0.943697	0.437602		0.186528	0.999689	0.455351
	0.725485	0.768085	0.37983		0.764742	0.824448	0.396031		0.569383	0.944048	0.43793		0.186782	1.00036	0.455692
	0.725494	0.768212	0.380114		0.765228	0.824848	0.396327		0.56948	0.944058	0.438257		0.18707	1.00039	0.456033
	0.725856	0.768526	0.380398		0.765279	0.824941	0.396623		0.569503	0.944115	0.438585		0.187258	1.00188	0.456374
	0.726431	0.76875	0.380682		0.765885	0.825174	0.396919		0.570052	0.94488	0.438913		0.187378	1.00222	0.456714
	0.726457	0.769399	0.380966		0.766331	0.82558	0.397216		0.571808	0.944908	0.43924		0.187378	1.00234	0.457055
	0.726675	0.770689	0.38125		0.766883	0.825601	0.397512		0.572178	0.946732	0.439568		0.18749	1.0025	0.457396
	0.727918	0.770763	0.381534		0.766972	0.82576	0.397808		0.572207	0.947022	0.439895		0.187505	1.0038	0.457737
	0.728198	0.771041	0.381818		0.767246	0.825875	0.398104		0.572811	0.947351	0.440223		0.187688	1.00386	0.458078
	0.729547	0.772167	0.382102		0.767429	0.825942	0.3984		0.573078	0.948495	0.44055		0.187777	1.00418	0.458419
	0.730065	0.773058	0.382386		0.769311	0.826577	0.398697		0.573326	0.94873	0.440878		0.187944	1.00451	0.458759
	0.730316	0.773857	0.38267		0.769969	0.827447	0.398993		0.573419	0.948941	0.441205		0.187944	1.00461	0.4591
	0.730442	0.774771	0.382955		0.770145	0.82775	0.399289		0.574157	0.949099	0.441533		0.187964	1.00599	0.459441
	0.730896	0.774839	0.383239		0.770708	0.827948	0.399585		0.574306	0.95101	0.44186		0.188202	1.00716	0.459782
	0.732841	0.775408	0.383523		0.771813	0.829056	0.399882		0.5744	0.95111	0.442188		0.188257	1.00728	0.460123
	0.733343	0.77627	0.383807		0.772025	0.829317	0.400178		0.57486	0.951853	0.442516		0.188289	1.00823	0.460464
	0.733916	0.776801	0.384091		0.773233	0.829858	0.400474		0.575351	0.952509	0.442843		0.188637	1.00855	0.460804
	0.734317	0.776916	0.384375		0.773672	0.830691	0.40077		0.575497	0.953393	0.443171		0.188652	1.00895	0.461145
	0.734969	0.777758	0.384659		0.774326	0.831154	0.401066		0.576317	0.953424	0.443498		0.18876	1.00935	0.461486
	0.735481	0.778275	0.384943		0.774697	0.831385	0.401363		0.577155	0.954848	0.443826		0.188804	1.01039	0.461827
	0.736051	0.77838	0.385227		0.774715	0.831855	0.401659		0.577413	0.956076	0.444153		0.188979	1.01197	0.462168
	0.736388	0.778396	0.385511		0.775188	0.83518	0.401955		0.578029	0.957103	0.444481		0.189184	1.01243	0.462509
	0.73651	0.779522	0.385795		0.775823	0.835626	0.402251		0.578119	0.957356	0.444808		0.189204	1.01248	0.462849
	0.737678	0.780142	0.38608		0.776607	0.835834	0.402547		0.57816	0.957668	0.445136		0.189314	1.0137	0.46319
	0.738289	0.782153	0.386364		0.776866	0.836087	0.402844		0.578517	0.957828	0.445463		0.189332	1.01406	0.463531
	0.738383	0.782297	0.386648		0.776915	0.838827	0.40314		0.578762	0.957891	0.445791		0.189431	1.01456	0.463872
	0.738408	0.783077	0.386932		0.777666	0.839271	0.403436		0.579097	0.958928	0.446119		0.18945	1.01513	0.464213
	0.738451	0.784529	0.387216		0.777976	0.839503	0.403732		0.57984	0.95912	0.446446		0.189534	1.01582	0.464554
	0.73856	0.784902	0.3875		0.778118	0.840078	0.404028		0.580966	0.959527	0.446774		0.189601	1.01607	0.464894
	0.741008	0.785283	0.387784		0.778303	0.840097	0.404325		0.581395	0.961032	0.447101		0.189814	1.0164	0.465235
	0.741799	0.785618	0.388068		0.778688	0.840537	0.404621		0.581681	0.961552	0.447429		0.189913	1.01674	0.465576
	0.741858	0.785933	0.388352		0.779076	0.841296	0.404917		0.58236	0.962477	0.447756		0.189961	1.01776	0.465917
	0.741872	0.786195	0.388636		0.7802	0.841915	0.405213		0.582866	0.963307	0.448084		0.189977	1.01879	0.466258
	0.742295	0.786279	0.38892		0.780727	0.842113	0.405509		0.583344	0.963338	0.448411		0.190004	1.01905	0.466599
	0.74294	0.786313	0.389205		0.781901	0.842498	0.405806		0.585693	0.963577	0.448739		0.190218	1.01965	0.466939
	0.743979	0.786341	0.389489		0.78217	0.842816	0.406102		0.586069	0.963993	0.449066		0.190395	1.0202	0.46728
	0.744743	0.786382	0.389773		0.784077	0.843159	0.406398		0.589015	0.964733	0.449394		0.190433	1.02077	0.467621
	0.744907	0.786669	0.390057		0.78415	0.843401	0.406694		0.589444	0.965763	0.449722		0.190569	1.02192	0.467962
	0.745308	0.789444	0.390341		0.784564	0.843529	0.406991		0.590037	0.966344	0.450049		0.190742	1.02298	0.468303
	0.746121	0.789873	0.390625		0.785324	0.843861	0.407287		0.590414	0.96702	0.450377		0.190971	1.02347	0.468643
	0.746931	0.789896	0.390909		0.785892	0.844663	0.407583		0.590466	0.967476	0.450704		0.191078	1.02391	0.468984
	0.746969	0.789937	0.391193		0.785985	0.84467	0.407879		0.591213	0.969543	0.451032		0.191477	1.02517	0.469325
	0.747167	0.790184	0.391477		0.786346	0.844881	0.408175		0.593264	0.970346	0.451359		0.191554	1.02519	0.469666
	0.747805	0.791188	0.391761		0.786582	0.84559	0.408472		0.594006	0.97255	0.451687		0.191734	1.02558	0.470007
	0.747936	0.791244	0.392045		0.786704	0.846895	0.408768		0.594317	0.973441	0.452014		0.191934	1.02567	0.470348
	0.74794	0.792478	0.39233		0.787519	0.847097	0.409064		0.594623	0.973664	0.452342		0.191996	1.02767	0.470688
	0.749396	0.793101	0.392614		0.787947	0.847103	0.40936		0.594708	0.973769	0.45267		0.192151	1.02859	0.471029
	0.750315	0.793132	0.392898		0.789464	0.847872	0.409656		0.595422	0.976397	0.452997		0.192204	1.0286	0.47137
	0.750424	0.793349	0.393182		0.790553	0.848119	0.409953		0.595743	0.977164	0.453325		0.192214	1.02889	0.471711
	0.75108	0.793576	0.393466		0.790956	0.848455	0.410249		0.595873	0.97749	0.453652		0.192245	1.02958	0.472052
	0.75117	0.794118	0.39375		0.791061	0.849078	0.410545		0.595879	0.978877	0.45398		0.192485	1.0303	0.472393
	0.752789	0.794404	0.394034		0.791434	0.849573	0.410841		0.596055	0.979078	0.454307		0.192874	1.03049	0.472733
	0.753043	0.7952	0.394318		0.792185	0.849812	0.411137		0.596455	0.979891	0.454635		0.193402	1.03061	0.473074
	0.754194	0.795497	0.394602		0.793841	0.849864	0.411434		0.597105	0.979903	0.454962		0.193435	1.03066	0.473415
	0.754481	0.795941	0.394886		0.793867	0.850035	0.41173		0.597276	0.979904	0.45529		0.193466	1.03114	0.473756
	0.757495	0.796588	0.39517		0.794433	0.850051	0.412026		0.597534	0.980933	0.455617		0.193521	1.03201	0.474097
	0.757564	0.79698	0.395455		0.794556	0.850477	0.412322		0.597878	0.981539	0.455945		0.193674	1.0321	0.474438
	0.75801	0.79756	0.395739		0.79533	0.850496	0.412618		0.598387	0.983763	0.456273		0.194546	1.03291	0.474778
	0.759254	0.797645	0.396023		0.795811	0.851968	0.412915		0.598434	0.98399	0.4566		0.195041	1.03572	0.475119
	0.760459	0.798378	0.396307		0.796077	0.852012	0.413211		0.598453	0.984495	0.456928		0.195335	1.036	0.47546
	0.760485	0.798636	0.396591		0.796838	0.852382	0.413507		0.598491	0.984563	0.457255		0.195501	1.03818	0.475801
	0.760716	0.798779	0.396875		0.796948	0.85285	0.413803		0.598501	0.985456	0.457583		0.195633	1.0382	0.476142
	0.761396	0.799663	0.397159		0.797862	0.854508	0.4141		0.59889	0.986367	0.45791		0.195818	1.03987	0.476483
	0.763075	0.800732	0.397443		0.797871	0.85451	0.414396		0.599297	0.986398	0.458238		0.196101	1.04031	0.476823
	0.763492	0.800896	0.397727		0.797902	0.854749	0.414692		0.599437	0.986857	0.458565		0.196468	1.04046	0.477164
	0.763926	0.800898	0.398011		0.800031	0.854765	0.414988		0.599948	0.987876	0.458893		0.19665	1.04087	0.477505
	0.763926	0.801335	0.398295		0.80115	0.855137	0.415284		0.600858	0.988056	0.45922		0.196844	1.04152	0.477846
	0.766038	0.801926	0.39858		0.802606	0.855392	0.415581		0.601415	0.988407	0.459548		0.197177	1.04165	0.478187
	0.766377	0.802392	0.398864		0.802628	0.855619	0.415877		0.601569	0.989107	0.459876		0.197566	1.04256	0.478528
	0.766404	0.802922	0.399148		0.802863	0.855708	0.416173		0.60163	0.989838	0.460203		0.197594	1.0428	0.478868
	0.766764	0.803127	0.399432		0.80467	0.85594	0.416469		0.601921	0.989969	0.460531		0.19763	1.04424	0.479209
	0.766794	0.803498	0.399716		0.804718	0.856005	0.416765		0.602533	0.990109	0.460858		0.198026	1.04443	0.47955
	0.766813	0.804136	0.4		0.804761	0.856311	0.417062		0.60272	0.991118	0.461186		0.198194	1.04557	0.479891
	0.768189	0.805183	0.400284		0.80545	0.856726	0.417358		0.603063	0.991639	0.461513		0.198267	1.0461	0.480232
	0.768228	0.805231	0.400568		0.805453	0.85676	0.417654		0.604589	0.993267	0.461841		0.198337	1.04711	0.480573
	0.768297	0.805381	0.400852		0.806158	0.856826	0.41795		0.604877	0.993817	0.462168		0.198483	1.04762	0.480913
	0.768663	0.805766	0.401136		0.806575	0.856835	0.418246		0.604973	0.995858	0.462496		0.198695	1.0478	0.481254
	0.769124	0.805933	0.40142		0.806749	0.857297	0.418543		0.605887	0.996137	0.462823		0.198938	1.04801	0.481595
	0.769344	0.806181	0.401705		0.806749	0.857744	0.418839		0.605909	0.996989	0.463151		0.199204	1.04843	0.481936
	0.771053	0.807244	0.401989		0.807053	0.858059	0.419135		0.606398	0.998418	0.463479		0.199277	1.04885	0.482277
	0.771891	0.807604	0.402273		0.807309	0.858088	0.419431		0.606828	0.999004	0.463806		0.199284	1.0494	0.482618
	0.771985	0.807888	0.402557		0.80885	0.858124	0.419727		0.607245	1.00053	0.464134		0.199374	1.04947	0.482958
	0.772412	0.808068	0.402841		0.809062	0.858297	0.420024		0.607282	1.00254	0.464461		0.199474	1.04994	0.483299
	0.773015	0.808369	0.403125		0.809984	0.858702	0.42032		0.607379	1.00269	0.464789		0.199609	1.05028	0.48364
	0.773168	0.809288	0.403409		0.81003	0.858725	0.420616		0.607779	1.00511	0.465116		0.199917	1.05073	0.483981
	0.773375	0.809303	0.403693		0.810377	0.860377	0.420912		0.608893	1.00516	0.465444		0.199976	1.05224	0.484322
	0.773598	0.809429	0.403977		0.810412	0.860384	0.421209		0.608966	1.00594	0.465771		0.200034	1.05236	0.484663
	0.774954	0.809736	0.404261		0.811016	0.860986	0.421505		0.609173	1.00693	0.466099		0.200153	1.0529	0.485003
	0.77516	0.810664	0.404545		0.811092	0.861211	0.421801		0.609203	1.00693	0.466426		0.200883	1.05333	0.485344
	0.775235	0.811354	0.40483		0.813024	0.861584	0.422097		0.609728	1.00798	0.466754		0.20111	1.0545	0.485685
	0.775982	0.811603	0.405114		0.813424	0.86181	0.422393		0.61016	1.00863	0.467082		0.201195	1.05535	0.486026
	0.777032	0.812133	0.405398		0.813491	0.863746	0.42269		0.610326	1.01013	0.467409		0.201246	1.05546	0.486367
	0.777796	0.812551	0.405682		0.813541	0.864027	0.422986		0.61099	1.01047	0.467737		0.201347	1.05597	0.486708
	0.77804	0.81304	0.405966		0.816251	0.864423	0.423282		0.612143	1.0125	0.468064		0.201473	1.05601	0.487048
	0.778526	0.813479	0.40625		0.817348	0.864651	0.423578		0.612643	1.0128	0.468392		0.20179	1.05643	0.487389
	0.778713	0.813683	0.406534		0.818282	0.864875	0.423874		0.613805	1.01308	0.468719		0.201901	1.0566	0.48773
	0.778952	0.814143	0.406818		0.819634	0.865344	0.424171		0.613934	1.01324	0.469047		0.201903	1.05719	0.488071
	0.779023	0.815151	0.407102		0.819943	0.865546	0.424467		0.614615	1.01364	0.469374		0.202101	1.05726	0.488412
	0.780286	0.816133	0.407386		0.819981	0.865646	0.424763		0.615139	1.01409	0.469702		0.202174	1.0574	0.488753
	0.781316	0.817052	0.40767		0.820138	0.86573	0.425059		0.615827	1.01422	0.470029		0.202373	1.05759	0.489093
	0.781324	0.817074	0.407955		0.820685	0.865846	0.425355		0.616377	1.01449	0.470357		0.202431	1.05822	0.489434
	0.782268	0.817138	0.408239		0.821482	0.866244	0.425652		0.618017	1.01552	0.470685		0.202465	1.05877	0.489775
	0.783713	0.817303	0.408523		0.821774	0.868104	0.425948		0.618243	1.01562	0.471012		0.20281	1.05902	0.490116
	0.784561	0.81745	0.408807		0.822388	0.868247	0.426244		0.618483	1.01703	0.47134		0.202877	1.05924	0.490457
	0.784578	0.818551	0.409091		0.823996	0.868851	0.42654		0.618507	1.01731	0.471667		0.202909	1.05934	0.490798
	0.785513	0.82026	0.409375		0.82474	0.868926	0.426836		0.619033	1.01781	0.471995		0.203059	1.05973	0.491138
	0.786099	0.82123	0.409659		0.824777	0.869045	0.427133		0.619862	1.01904	0.472322		0.203221	1.06007	0.491479
	0.786164	0.821741	0.409943		0.824889	0.870643	0.427429		0.620046	1.01932	0.47265		0.203275	1.06009	0.49182
	0.786639	0.822606	0.410227		0.825502	0.87125	0.427725		0.620836	1.01955	0.472977		0.203426	1.06053	0.492161
	0.786856	0.822648	0.410511		0.825836	0.872331	0.428021		0.621184	1.02058	0.473305		0.203475	1.06339	0.492502
	0.78737	0.823739	0.410795		0.826422	0.872976	0.428318		0.62121	1.02085	0.473632		0.203561	1.06383	0.492843
	0.787767	0.824033	0.41108		0.827035	0.873338	0.428614		0.621308	1.02131	0.47396		0.203665	1.06397	0.493183
	0.789461	0.825085	0.411364		0.827608	0.873555	0.42891		0.621315	1.02263	0.474288		0.20392	1.0642	0.493524
	0.78964	0.825163	0.411648		0.827952	0.874481	0.429206		0.621943	1.02325	0.474615		0.204242	1.06483	0.493865
	0.789676	0.825286	0.411932		0.829348	0.874656	0.429502		0.622254	1.02364	0.474943		0.204272	1.06494	0.494206
	0.790391	0.826145	0.412216		0.831542	0.874935	0.429799		0.622583	1.02384	0.47527		0.205227	1.06577	0.494547
	0.791324	0.826219	0.4125		0.832287	0.875075	0.430095		0.623527	1.02428	0.475598		0.205581	1.06797	0.494888
	0.791626	0.826338	0.412784		0.832763	0.875678	0.430391		0.62447	1.02635	0.475925		0.206208	1.0684	0.495228
	0.792017	0.826816	0.413068		0.833366	0.876261	0.430687		0.62461	1.02686	0.476253		0.206482	1.06992	0.495569
	0.792428	0.82706	0.413352		0.835822	0.876899	0.430983		0.624624	1.02747	0.47658		0.206719	1.06992	0.49591
	0.79273	0.827183	0.413636		0.836568	0.876907	0.43128		0.625364	1.02805	0.476908		0.206829	1.07057	0.496251
	0.794451	0.827663	0.41392		0.836654	0.876944	0.431576		0.625737	1.02856	0.477236		0.207047	1.07081	0.496592
	0.79469	0.827934	0.414205		0.83675	0.87737	0.431872		0.627627	1.02878	0.477563		0.207342	1.07083	0.496933
	0.795502	0.830436	0.414489		0.8379	0.877773	0.432168		0.628452	1.03155	0.477891		0.207426	1.07154	0.497273
	0.795554	0.831197	0.414773		0.838186	0.878276	0.432464		0.629228	1.03233	0.478218		0.20758	1.0724	0.497614
	0.796211	0.831886	0.415057		0.838563	0.878482	0.432761		0.62981	1.03488	0.478546		0.20772	1.0725	0.497955
	0.796714	0.83292	0.415341		0.838873	0.878608	0.433057		0.630108	1.03533	0.478873		0.207959	1.07252	0.498296
	0.796782	0.833034	0.415625		0.840062	0.878748	0.433353		0.630145	1.03548	0.479201		0.208339	1.07382	0.498637
	0.796988	0.833266	0.415909		0.840188	0.879297	0.433649		0.630309	1.03623	0.479528		0.208422	1.07421	0.498978
	0.797049	0.833475	0.416193		0.840617	0.88004	0.433945		0.630982	1.03666	0.479856		0.20853	1.07482	0.499318
	0.797141	0.834182	0.416477		0.841596	0.881483	0.434242		0.6328	1.03698	0.480183		0.208571	1.07548	0.499659
	0.797399	0.835032	0.416761		0.841785	0.882083	0.434538		0.632812	1.03795	0.480511		0.208633	1.07571	0.5
	0.797598	0.835458	0.417045		0.841794	0.882547	0.434834		0.6329	1.0385	0.480839		0.20914	1.07585	0.500341
	0.797869	0.837449	0.41733		0.841957	0.882686	0.43513		0.633175	1.04073	0.481166		0.209155	1.07718	0.500682
	0.799169	0.838061	0.417614		0.843494	0.882881	0.435427		0.633839	1.04124	0.481494		0.209239	1.07834	0.501022
	0.799549	0.838118	0.417898		0.844098	0.882927	0.435723		0.634139	1.04271	0.481821		0.20931	1.07851	0.501363
	0.800127	0.838311	0.418182		0.844953	0.883604	0.436019		0.634224	1.04357	0.482149		0.209634	1.07878	0.501704
	0.800929	0.838672	0.418466		0.845525	0.884244	0.436315		0.634565	1.04358	0.482476		0.209706	1.07975	0.502045
	0.801951	0.838848	0.41875		0.845929	0.884353	0.436611		0.635687	1.04383	0.482804		0.209999	1.08037	0.502386
	0.802391	0.839693	0.419034		0.846147	0.884372	0.436908		0.636043	1.04404	0.483131		0.210633	1.08105	0.502727
	0.803102	0.8405	0.419318		0.84629	0.884531	0.437204		0.636184	1.0444	0.483459		0.210968	1.08223	0.503067
	0.803278	0.840718	0.419602		0.847152	0.884888	0.4375		0.636589	1.04499	0.483786		0.211163	1.08247	0.503408
	0.803386	0.841223	0.419886		0.847896	0.886236	0.437796		0.637195	1.04517	0.484114		0.211692	1.08252	0.503749
	0.804849	0.841257	0.42017		0.84884	0.886592	0.438092		0.637206	1.04541	0.484442		0.211747	1.08348	0.50409
	0.805624	0.842002	0.420455		0.849456	0.886912	0.438389		0.637371	1.04659	0.484769		0.211749	1.08352	0.504431
	0.806346	0.843237	0.420739		0.850572	0.887053	0.438685		0.637843	1.04744	0.485097		0.21232	1.0838	0.504772
	0.807215	0.843395	0.421023		0.850739	0.887137	0.438981		0.637876	1.04933	0.485424		0.21235	1.08463	0.505112
	0.807311	0.843853	0.421307		0.850807	0.887732	0.439277		0.637917	1.05014	0.485752		0.212362	1.08576	0.505453
	0.807436	0.844894	0.421591		0.850907	0.888051	0.439573		0.637955	1.05021	0.486079		0.212527	1.08797	0.505794
	0.807709	0.84501	0.421875		0.851195	0.888497	0.43987		0.638136	1.05119	0.486407		0.212551	1.08888	0.506135
	0.808017	0.84537	0.422159		0.851913	0.888634	0.440166		0.639581	1.05281	0.486734		0.212697	1.08932	0.506476
	0.808091	0.845481	0.422443		0.852722	0.888957	0.440462		0.639648	1.05313	0.487062		0.213449	1.09062	0.506817
	0.809499	0.845807	0.422727		0.853251	0.889186	0.440758		0.639668	1.05419	0.487389		0.213657	1.09073	0.507157
	0.809622	0.846092	0.423011		0.853867	0.890559	0.441055		0.639921	1.05457	0.487717		0.214015	1.09097	0.507498
	0.810366	0.846324	0.423295		0.854073	0.891936	0.441351		0.639994	1.05516	0.488045		0.214137	1.09099	0.507839
	0.810588	0.846696	0.42358		0.854197	0.892146	0.441647		0.641034	1.0555	0.488372		0.21426	1.09278	0.50818
	0.810816	0.847322	0.423864		0.854508	0.89225	0.441943		0.641984	1.05619	0.4887		0.214707	1.09298	0.508521
	0.81107	0.848153	0.424148		0.858808	0.892333	0.442239		0.641986	1.05671	0.489027		0.215036	1.09473	0.508862
	0.811764	0.848526	0.424432		0.859104	0.892443	0.442536		0.643371	1.05672	0.489355		0.215137	1.09566	0.509202
	0.811851	0.848569	0.424716		0.859267	0.895265	0.442832		0.643715	1.05726	0.489682		0.215184	1.09909	0.509543
	0.81194	0.848577	0.425		0.860477	0.895477	0.443128		0.643877	1.05769	0.49001		0.215381	1.0992	0.509884
	0.812313	0.84885	0.425284		0.860484	0.895819	0.443424		0.644611	1.058	0.490337		0.215688	1.09941	0.510225
	0.812529	0.849113	0.425568		0.860997	0.896246	0.44372		0.644712	1.05875	0.490665		0.215765	1.09981	0.510566
	0.812599	0.85001	0.425852		0.861135	0.896495	0.444017		0.644808	1.05981	0.490992		0.215883	1.10018	0.510907
	0.813133	0.850521	0.426136		0.861307	0.896792	0.444313		0.645261	1.06014	0.49132		0.216213	1.10059	0.511247
	0.813694	0.851777	0.42642		0.861524	0.897784	0.444609		0.64546	1.0605	0.491648		0.216262	1.10115	0.511588
	0.81377	0.852403	0.426705		0.861576	0.898528	0.444905		0.645779	1.06068	0.491975		0.216356	1.10119	0.511929
	0.81504	0.852415	0.426989		0.861765	0.898551	0.445201		0.646626	1.06122	0.492303		0.216539	1.10198	0.51227
	0.815985	0.852451	0.427273		0.862162	0.898623	0.445498		0.646964	1.06185	0.49263		0.216598	1.1033	0.512611
	0.816221	0.852542	0.427557		0.862192	0.898754	0.445794		0.647021	1.06185	0.492958		0.216874	1.10359	0.512952
	0.816405	0.852692	0.427841		0.86373	0.900599	0.44609		0.6481	1.06276	0.493285		0.216967	1.1046	0.513292
	0.817639	0.852784	0.428125		0.864847	0.900982	0.446386		0.648524	1.06304	0.493613		0.217144	1.10484	0.513633
	0.817893	0.853547	0.428409		0.865028	0.902078	0.446682		0.648534	1.06334	0.49394		0.21726	1.10488	0.513974
	0.818694	0.85497	0.428693		0.865749	0.902745	0.446979		0.650879	1.06344	0.494268		0.217366	1.10568	0.514315
	0.819687	0.855058	0.428977		0.866224	0.903061	0.447275		0.651269	1.0638	0.494595		0.217553	1.10736	0.514656
	0.820293	0.855639	0.429261		0.866587	0.903199	0.447571		0.652095	1.06424	0.494923		0.217798	1.10788	0.514997
	0.820302	0.85663	0.429545		0.867856	0.903233	0.447867		0.652241	1.06678	0.495251		0.217905	1.10915	0.515337
	0.822959	0.856634	0.42983		0.868558	0.904322	0.448164		0.652338	1.06781	0.495578		0.217961	1.10925	0.515678
	0.823314	0.857463	0.430114		0.869054	0.904453	0.44846		0.65384	1.06804	0.495906		0.218106	1.10927	0.516019
	0.823344	0.858221	0.430398		0.870269	0.906038	0.448756		0.654691	1.06882	0.496233		0.218264	1.10957	0.51636
	0.823627	0.858439	0.430682		0.874056	0.906463	0.449052		0.654782	1.06894	0.496561		0.218378	1.11051	0.516701
	0.824295	0.858984	0.430966		0.876185	0.906773	0.449348		0.656213	1.07006	0.496888		0.218439	1.11103	0.517042
	0.825564	0.859447	0.43125		0.877419	0.90682	0.449645		0.656588	1.0705	0.497216		0.218497	1.11111	0.517382
	0.825782	0.859527	0.431534		0.877743	0.907177	0.449941		0.656917	1.07086	0.497543		0.218573	1.11199	0.517723
	0.826363	0.859554	0.431818		0.877922	0.908103	0.450237		0.657583	1.0718	0.497871		0.219146	1.11233	0.518064
	0.826903	0.860685	0.432102		0.877999	0.908262	0.450533		0.658247	1.07301	0.498198		0.219401	1.11594	0.518405
	0.829172	0.860975	0.432386		0.878529	0.908287	0.450829		0.659808	1.07317	0.498526		0.219657	1.11673	0.518746
	0.83067	0.861927	0.43267		0.879832	0.909355	0.451126		0.660725	1.07413	0.498854		0.220005	1.11681	0.519087
	0.831032	0.862583	0.432955		0.880708	0.909527	0.451422		0.660738	1.0744	0.499181		0.220035	1.11753	0.519427
	0.831267	0.862982	0.433239		0.88094	0.910387	0.451718		0.660755	1.07508	0.499509		0.220168	1.11757	0.519768
	0.832122	0.863595	0.433523		0.881953	0.91043	0.452014		0.663099	1.0751	0.499836		0.220429	1.11864	0.520109
	0.832736	0.864721	0.433807		0.882094	0.910525	0.45231		0.663786	1.07586	0.500164		0.220468	1.11971	0.52045
	0.833772	0.864768	0.434091		0.882191	0.910781	0.452607		0.663884	1.07661	0.500491		0.220686	1.12039	0.520791
	0.834105	0.865228	0.434375		0.882859	0.912245	0.452903		0.66391	1.07993	0.500819		0.220954	1.12067	0.521132
	0.834331	0.866074	0.434659		0.882891	0.912461	0.453199		0.664175	1.0802	0.501146		0.22179	1.12097	0.521472
	0.834578	0.866272	0.434943		0.883262	0.912854	0.453495		0.664779	1.0813	0.501474		0.222034	1.12255	0.521813
	0.834773	0.867463	0.435227		0.883916	0.913437	0.453791		0.665635	1.08252	0.501802		0.222077	1.12533	0.522154
	0.83524	0.867538	0.435511		0.885735	0.913657	0.454088		0.665807	1.08278	0.502129		0.222121	1.12538	0.522495
	0.836475	0.868486	0.435795		0.886328	0.913846	0.454384		0.666114	1.08313	0.502457		0.222131	1.12637	0.522836
	0.837248	0.869125	0.43608		0.888103	0.914032	0.45468		0.666125	1.08338	0.502784		0.222347	1.12692	0.523177
	0.838348	0.86935	0.436364		0.888336	0.914377	0.454976		0.667187	1.08353	0.503112		0.222461	1.12708	0.523517
	0.840799	0.870879	0.436648		0.888368	0.914657	0.455273		0.66733	1.08405	0.503439		0.222512	1.12767	0.523858
	0.841424	0.872317	0.436932		0.888549	0.916082	0.455569		0.668231	1.08555	0.503767		0.222563	1.12865	0.524199
	0.84172	0.872837	0.437216		0.888698	0.917648	0.455865		0.6692	1.08582	0.504094		0.22287	1.13015	0.52454
	0.841764	0.873036	0.4375		0.89028	0.918275	0.456161		0.669835	1.08591	0.504422		0.22291	1.13151	0.524881
	0.841868	0.873411	0.437784		0.890585	0.918713	0.456457		0.670845	1.08769	0.504749		0.223035	1.13258	0.525222
	0.842016	0.873606	0.438068		0.890643	0.919053	0.456754		0.670941	1.08854	0.505077		0.22375	1.133	0.525562
	0.842571	0.873762	0.438352		0.890743	0.919459	0.45705		0.671381	1.09073	0.505405		0.224009	1.13314	0.525903
	0.842772	0.87434	0.438636		0.891597	0.919524	0.457346		0.671557	1.09196	0.505732		0.224189	1.13329	0.526244
	0.843366	0.874435	0.43892		0.892409	0.920692	0.457642		0.672026	1.09371	0.50606		0.225054	1.13385	0.526585
	0.844282	0.874526	0.439205		0.892478	0.921128	0.457938		0.6725	1.0941	0.506387		0.225054	1.13786	0.526926
	0.845751	0.876856	0.439489		0.893429	0.921257	0.458235		0.672541	1.09582	0.506715		0.225094	1.13994	0.527267
	0.846511	0.878691	0.439773		0.894477	0.921951	0.458531		0.672933	1.09637	0.507042		0.225191	1.14059	0.527607
	0.849968	0.879197	0.440057		0.895109	0.922672	0.458827		0.672949	1.09827	0.50737		0.225253	1.14086	0.527948
	0.8501	0.879455	0.440341		0.89684	0.924704	0.459123		0.673983	1.09877	0.507697		0.225374	1.14342	0.528289
	0.851491	0.87967	0.440625		0.89686	0.924855	0.459419		0.675644	1.09921	0.508025		0.225572	1.14351	0.52863
	0.85229	0.879845	0.440909		0.897511	0.924871	0.459716		0.67659	1.1003	0.508352		0.22561	1.14365	0.528971
	0.852384	0.879896	0.441193		0.898346	0.925958	0.460012		0.677328	1.10125	0.50868		0.22582	1.14409	0.529312
	0.852692	0.881639	0.441477		0.898861	0.926438	0.460308		0.677757	1.1013	0.509008		0.226311	1.14537	0.529652
	0.853254	0.882633	0.441761		0.899184	0.926468	0.460604		0.677762	1.10156	0.509335		0.226535	1.14666	0.529993
	0.853613	0.882754	0.442045		0.899646	0.926468	0.4609		0.678348	1.1029	0.509663		0.2266	1.14847	0.530334
	0.854612	0.883763	0.44233		0.900375	0.926718	0.461197		0.678539	1.10379	0.50999		0.226663	1.14981	0.530675
	0.854635	0.884609	0.442614		0.900702	0.927228	0.461493		0.678621	1.1039	0.510318		0.226807	1.14991	0.531016
	0.854797	0.885148	0.442898		0.900992	0.927296	0.461789		0.679073	1.10474	0.510645		0.226954	1.14999	0.531357
	0.854909	0.886817	0.443182		0.901175	0.927503	0.462085		0.679859	1.10486	0.510973		0.227016	1.15156	0.531697
	0.855536	0.889638	0.443466		0.901211	0.928038	0.462382		0.680201	1.10487	0.5113		0.227119	1.15184	0.532038
	0.855839	0.890204	0.44375		0.901992	0.928625	0.462678		0.680717	1.10506	0.511628		0.227273	1.15214	0.532379
	0.855875	0.89169	0.444034		0.903193	0.92983	0.462974		0.680831	1.10667	0.511955		0.227564	1.15435	0.53272
	0.856296	0.892047	0.444318		0.903251	0.930726	0.46327		0.681654	1.10669	0.512283		0.22798	1.15487	0.533061
	0.857011	0.89223	0.444602		0.90333	0.93112	0.463566		0.68362	1.10809	0.512611		0.228003	1.15499	0.533401
	0.857099	0.893028	0.444886		0.903581	0.931666	0.463863		0.683901	1.1082	0.512938		0.22807	1.15562	0.533742
	0.858269	0.893242	0.44517		0.904228	0.9317	0.464159		0.684653	1.10837	0.513266		0.228194	1.15565	0.534083
	0.859081	0.8933	0.445455		0.904579	0.932278	0.464455		0.684828	1.11002	0.513593		0.228233	1.15588	0.534424
	0.860558	0.893311	0.445739		0.904653	0.93245	0.464751		0.685659	1.11057	0.513921		0.228258	1.15609	0.534765
	0.860794	0.893387	0.446023		0.904671	0.932552	0.465047		0.685888	1.11072	0.514248		0.228293	1.15859	0.535106
	0.860991	0.894157	0.446307		0.90492	0.932826	0.465344		0.686786	1.11235	0.514576		0.228533	1.16009	0.535446
	0.861987	0.89519	0.446591		0.904953	0.93343	0.46564		0.687161	1.11261	0.514903		0.228544	1.16038	0.535787
	0.863329	0.895365	0.446875		0.907402	0.933825	0.465936		0.687264	1.11348	0.515231		0.228771	1.16447	0.536128
	0.86387	0.896732	0.447159		0.90776	0.93489	0.466232		0.687857	1.11416	0.515558		0.229293	1.16451	0.536469
	0.865	0.899487	0.447443		0.907846	0.935031	0.466528		0.688372	1.11449	0.515886		0.229489	1.16456	0.53681
	0.866123	0.900927	0.447727		0.908043	0.935334	0.466825		0.689643	1.11623	0.516214		0.229708	1.1649	0.537151
	0.866227	0.900966	0.448011		0.90812	0.936841	0.467121		0.689941	1.11645	0.516541		0.22976	1.16541	0.537491
	0.866964	0.901532	0.448295		0.908939	0.937367	0.467417		0.689945	1.11657	0.516869		0.229907	1.16614	0.537832
	0.866967	0.901898	0.44858		0.909782	0.937454	0.467713		0.690046	1.11675	0.517196		0.230253	1.16672	0.538173
	0.868088	0.902893	0.448864		0.910738	0.938114	0.468009		0.691845	1.11683	0.517524		0.230419	1.16808	0.538514
	0.868839	0.902924	0.449148		0.911313	0.938125	0.468306		0.691865	1.11721	0.517851		0.230846	1.16923	0.538855
	0.869567	0.903103	0.449432		0.911423	0.938211	0.468602		0.69188	1.11787	0.518179		0.230961	1.16937	0.539196
	0.869598	0.903124	0.449716		0.911699	0.939058	0.468898		0.692303	1.11814	0.518506		0.231046	1.16959	0.539536
	0.870549	0.903206	0.45		0.914312	0.939362	0.469194		0.694161	1.1192	0.518834		0.231073	1.16995	0.539877
	0.871545	0.903552	0.450284		0.914385	0.940274	0.469491		0.694445	1.11958	0.519161		0.231285	1.17217	0.540218
	0.871573	0.903757	0.450568		0.914929	0.940591	0.469787		0.69484	1.11961	0.519489		0.231503	1.17296	0.540559
	0.871688	0.904379	0.450852		0.915058	0.941186	0.470083		0.694998	1.12001	0.519817		0.231567	1.17296	0.5409
	0.872362	0.906136	0.451136		0.91601	0.943474	0.470379		0.695143	1.1211	0.520144		0.231604	1.17302	0.541241
	0.872616	0.906836	0.45142		0.917099	0.943594	0.470675		0.695657	1.12143	0.520472		0.231663	1.17328	0.541581
	0.872667	0.907445	0.451705		0.917177	0.944279	0.470972		0.69587	1.12172	0.520799		0.23174	1.17373	0.541922
	0.873565	0.907482	0.451989		0.920978	0.944407	0.471268		0.69656	1.12201	0.521127		0.231783	1.17579	0.542263
	0.873769	0.907553	0.452273		0.922068	0.945461	0.471564		0.697094	1.12327	0.521454		0.231817	1.17674	0.542604
	0.874321	0.907836	0.452557		0.922242	0.945724	0.47186		0.697286	1.12334	0.521782		0.232022	1.17809	0.542945
	0.874539	0.908588	0.452841		0.922281	0.945939	0.472156		0.697398	1.12409	0.522109		0.232231	1.17827	0.543286
	0.875552	0.908932	0.453125		0.923794	0.945947	0.472453		0.697859	1.1244	0.522437		0.232352	1.17898	0.543626
	0.876513	0.909617	0.453409		0.924727	0.946284	0.472749		0.698917	1.12627	0.522764		0.232646	1.18004	0.543967
	0.876984	0.909941	0.453693		0.924954	0.94636	0.473045		0.699374	1.12631	0.523092		0.232778	1.18032	0.544308
	0.877028	0.909973	0.453977		0.926536	0.947124	0.473341		0.699865	1.12764	0.52342		0.232959	1.18051	0.544649
	0.877314	0.909994	0.454261		0.926572	0.94739	0.473637		0.700687	1.12896	0.523747		0.233083	1.18054	0.54499
	0.877411	0.910485	0.454545		0.928143	0.947694	0.473934		0.70161	1.12922	0.524075		0.23319	1.18113	0.545331
	0.877664	0.910613	0.45483		0.929002	0.947946	0.47423		0.702567	1.12958	0.524402		0.233364	1.18381	0.545671
	0.878329	0.910726	0.455114		0.929109	0.948015	0.474526		0.703249	1.13018	0.52473		0.233986	1.185	0.546012
	0.878413	0.911951	0.455398		0.929168	0.94805	0.474822		0.703482	1.13042	0.525057		0.234162	1.18503	0.546353
	0.878569	0.912186	0.455682		0.929343	0.948072	0.475118		0.70369	1.13288	0.525385		0.234563	1.18546	0.546694
	0.88025	0.912224	0.455966		0.929673	0.948677	0.475415		0.704265	1.13292	0.525712		0.234563	1.18596	0.547035
	0.880658	0.912527	0.45625		0.930304	0.949565	0.475711		0.705579	1.13293	0.52604		0.234598	1.18618	0.547376
	0.8807	0.913104	0.456534		0.930379	0.949812	0.476007		0.706491	1.13387	0.526368		0.2346	1.18646	0.547716
	0.881091	0.913391	0.456818		0.935194	0.950033	0.476303		0.706985	1.1345	0.526695		0.234744	1.18734	0.548057
	0.882211	0.913562	0.457102		0.936143	0.950494	0.4766		0.707695	1.13578	0.527023		0.23475	1.18826	0.548398
	0.883193	0.915536	0.457386		0.936435	0.951156	0.476896		0.707733	1.13593	0.52735		0.234768	1.1883	0.548739
	0.88371	0.915584	0.45767		0.937586	0.951437	0.477192		0.70783	1.1374	0.527678		0.234783	1.18908	0.54908
	0.886415	0.91591	0.457955		0.938304	0.951443	0.477488		0.707856	1.13765	0.528005		0.235167	1.1905	0.549421
	0.886472	0.916112	0.458239		0.939937	0.952913	0.477784		0.70912	1.13812	0.528333		0.235221	1.19054	0.549761
	0.887129	0.916782	0.458523		0.943066	0.953695	0.478081		0.710485	1.13919	0.52866		0.235287	1.19062	0.550102
	0.887132	0.916799	0.458807		0.943887	0.954228	0.478377		0.710546	1.13938	0.528988		0.235287	1.19083	0.550443
	0.887183	0.917622	0.459091		0.944272	0.954283	0.478673		0.711253	1.13945	0.529315		0.235479	1.19088	0.550784
	0.887562	0.91881	0.459375		0.944972	0.956449	0.478969		0.711301	1.14122	0.529643		0.235486	1.19097	0.551125
	0.887565	0.918904	0.459659		0.945918	0.956683	0.479265		0.711364	1.14188	0.529971		0.23559	1.19119	0.551466
	0.887662	0.919137	0.459943		0.946968	0.957169	0.479562		0.712044	1.14228	0.530298		0.235856	1.19214	0.551806
	0.888056	0.919741	0.460227		0.949235	0.957585	0.479858		0.712448	1.14341	0.530626		0.23647	1.193	0.552147
	0.888638	0.919762	0.460511		0.949687	0.958579	0.480154		0.712571	1.14389	0.530953		0.23676	1.19481	0.552488
	0.889046	0.921518	0.460795		0.950107	0.960057	0.48045		0.713076	1.14461	0.531281		0.237185	1.19598	0.552829
	0.889953	0.922093	0.46108		0.95016	0.961424	0.480746		0.713124	1.14509	0.531608		0.237792	1.19645	0.55317
	0.890271	0.922133	0.461364		0.950508	0.962647	0.481043		0.713724	1.14562	0.531936		0.237927	1.19775	0.553511
	0.891901	0.922687	0.461648		0.951134	0.962694	0.481339		0.714117	1.147	0.532263		0.238465	1.19949	0.553851
	0.892221	0.923003	0.461932		0.952024	0.96302	0.481635		0.714137	1.14762	0.532591		0.238489	1.20209	0.554192
	0.892629	0.924104	0.462216		0.953922	0.963116	0.481931		0.714268	1.14904	0.532918		0.238727	1.20306	0.554533
	0.89294	0.92453	0.4625		0.954099	0.963462	0.482227		0.714291	1.14998	0.533246		0.238732	1.20331	0.554874
	0.893189	0.924851	0.462784		0.954109	0.964872	0.482524		0.714609	1.15023	0.533574		0.238946	1.20331	0.555215
	0.894305	0.925496	0.463068		0.955143	0.965721	0.48282		0.714694	1.15052	0.533901		0.239068	1.20534	0.555556
	0.896141	0.92562	0.463352		0.957152	0.967128	0.483116		0.715416	1.15293	0.534229		0.239337	1.20778	0.555896
	0.896576	0.926606	0.463636		0.957783	0.970659	0.483412		0.715596	1.15413	0.534556		0.239347	1.21022	0.556237
	0.896692	0.92663	0.46392		0.958984	0.971099	0.483709		0.715912	1.15529	0.534884		0.239488	1.21082	0.556578
	0.897149	0.928176	0.464205		0.96187	0.971399	0.484005		0.716231	1.15532	0.535211		0.23956	1.21248	0.556919
	0.897947	0.928296	0.464489		0.963973	0.971802	0.484301		0.716231	1.15722	0.535539		0.240254	1.21418	0.55726
	0.899274	0.928664	0.464773		0.966677	0.972994	0.484597		0.71642	1.15726	0.535866		0.240771	1.21453	0.557601
	0.899803	0.929728	0.465057		0.967004	0.973536	0.484893		0.717	1.15739	0.536194		0.240834	1.21603	0.557941
	0.901739	0.931008	0.465341		0.968817	0.974089	0.48519		0.717561	1.15791	0.536521		0.240983	1.21635	0.558282
	0.90175	0.931572	0.465625		0.968941	0.975595	0.485486		0.717783	1.15883	0.536849		0.241049	1.2166	0.558623
	0.902037	0.931952	0.465909		0.969321	0.97576	0.485782		0.717868	1.1599	0.537177		0.241093	1.21661	0.558964
	0.902133	0.932761	0.466193		0.96993	0.976258	0.486078		0.717982	1.16025	0.537504		0.241529	1.21789	0.559305
	0.902509	0.934587	0.466477		0.970344	0.976274	0.486374		0.718409	1.16041	0.537832		0.24162	1.21811	0.559646
	0.903214	0.934744	0.466761		0.971291	0.976354	0.486671		0.718644	1.16175	0.538159		0.241663	1.21919	0.559986
	0.903882	0.934839	0.467045		0.972083	0.976403	0.486967		0.719892	1.16257	0.538487		0.241774	1.2192	0.560327
	0.904186	0.936059	0.46733		0.972182	0.976799	0.487263		0.721245	1.16291	0.538814		0.242504	1.22166	0.560668
	0.904596	0.936291	0.467614		0.972209	0.977298	0.487559		0.721389	1.16319	0.539142		0.242558	1.22175	0.561009
	0.905135	0.936946	0.467898		0.972228	0.978112	0.487855		0.721688	1.16361	0.539469		0.242645	1.22176	0.56135
	0.906027	0.937339	0.468182		0.972476	0.978185	0.488152		0.722606	1.16371	0.539797		0.242743	1.2228	0.561691
	0.906704	0.937908	0.468466		0.97347	0.978195	0.488448		0.723022	1.1652	0.540124		0.242782	1.22283	0.562031
	0.909765	0.938283	0.46875		0.97402	0.978805	0.488744		0.723113	1.16526	0.540452		0.243282	1.22313	0.562372
	0.91	0.938449	0.469034		0.974021	0.979266	0.48904		0.723637	1.16677	0.54078		0.244025	1.22373	0.562713
	0.912043	0.938799	0.469318		0.975124	0.980047	0.489336		0.723768	1.16726	0.541107		0.244297	1.22442	0.563054
	0.913409	0.938811	0.469602		0.97531	0.981946	0.489633		0.723783	1.16746	0.541435		0.244422	1.22459	0.563395
	0.913665	0.939432	0.469886		0.975325	0.982135	0.489929		0.724631	1.16809	0.541762		0.244666	1.22543	0.563736
	0.913888	0.940618	0.47017		0.977572	0.982205	0.490225		0.72616	1.169	0.54209		0.244679	1.22551	0.564076
	0.913947	0.940744	0.470455		0.978057	0.982955	0.490521		0.726428	1.16997	0.542417		0.244698	1.22597	0.564417
	0.915383	0.940958	0.470739		0.978162	0.983207	0.490818		0.727554	1.16998	0.542745		0.244776	1.22622	0.564758
	0.915821	0.941131	0.471023		0.97818	0.983281	0.491114		0.728272	1.17047	0.543072		0.244939	1.22626	0.565099
	0.91784	0.941202	0.471307		0.978798	0.983734	0.49141		0.728306	1.17334	0.5434		0.245428	1.22707	0.56544
	0.918531	0.941247	0.471591		0.979111	0.983875	0.491706		0.73016	1.17508	0.543727		0.246056	1.23019	0.565781
	0.919869	0.942362	0.471875		0.979116	0.983997	0.492002		0.730314	1.17665	0.544055		0.246237	1.23085	0.566121
	0.920927	0.942514	0.472159		0.982013	0.984592	0.492299		0.730564	1.17715	0.544383		0.24624	1.23113	0.566462
	0.922754	0.945164	0.472443		0.982816	0.985937	0.492595		0.731159	1.17747	0.54471		0.246342	1.23136	0.566803
	0.922785	0.945523	0.472727		0.98294	0.986506	0.492891		0.732179	1.17777	0.545038		0.246361	1.23207	0.567144
	0.924148	0.946234	0.473011		0.983814	0.986538	0.493187		0.732411	1.17885	0.545365		0.246461	1.23239	0.567485
	0.924387	0.948302	0.473295		0.985018	0.986724	0.493483		0.732852	1.18087	0.545693		0.24659	1.23258	0.567825
	0.927632	0.949358	0.47358		0.985233	0.987021	0.49378		0.734322	1.18116	0.54602		0.246718	1.23414	0.568166
	0.928363	0.949522	0.473864		0.985662	0.987457	0.494076		0.734608	1.18123	0.546348		0.246778	1.23465	0.568507
	0.929083	0.950737	0.474148		0.986333	0.987754	0.494372		0.734917	1.1822	0.546675		0.246829	1.23545	0.568848
	0.929856	0.95098	0.474432		0.98707	0.988118	0.494668		0.735127	1.18255	0.547003		0.246867	1.23625	0.569189
	0.929963	0.951394	0.474716		0.987118	0.991425	0.494964		0.7352	1.18395	0.54733		0.247291	1.23666	0.56953
	0.930249	0.952888	0.475		0.99013	0.993083	0.495261		0.735416	1.18434	0.547658		0.247333	1.23787	0.56987
	0.930395	0.953216	0.475284		0.991005	0.993206	0.495557		0.735538	1.18476	0.547986		0.247481	1.238	0.570211
	0.93071	0.9547	0.475568		0.991185	0.993299	0.495853		0.73565	1.18541	0.548313		0.247572	1.23931	0.570552
	0.931813	0.955365	0.475852		0.991658	0.993605	0.496149		0.735794	1.18572	0.548641		0.248091	1.2395	0.570893
	0.931927	0.955946	0.476136		0.991993	0.994009	0.496445		0.736238	1.18595	0.548968		0.248096	1.23985	0.571234
	0.935501	0.956709	0.47642		0.992892	0.994144	0.496742		0.736516	1.18599	0.549296		0.248279	1.24052	0.571575
	0.936392	0.957018	0.476705		0.994477	0.994413	0.497038		0.736571	1.18692	0.549623		0.249232	1.2409	0.571915
	0.936942	0.957567	0.476989		0.994718	0.995846	0.497334		0.738955	1.18738	0.549951		0.249264	1.24114	0.572256
	0.936988	0.958565	0.477273		0.995036	0.996134	0.49763		0.740072	1.18779	0.550278		0.249349	1.24135	0.572597
	0.937635	0.959029	0.477557		0.995979	0.996233	0.497927		0.740272	1.18911	0.550606		0.24959	1.24289	0.572938
	0.938248	0.959114	0.477841		0.996283	0.996279	0.498223		0.740448	1.19024	0.550934		0.249611	1.24442	0.573279
	0.9389	0.959654	0.478125		0.996773	0.996436	0.498519		0.7422	1.19094	0.551261		0.249659	1.24499	0.57362
	0.939009	0.960007	0.478409		0.997292	0.997158	0.498815		0.742511	1.19094	0.551589		0.249696	1.24582	0.57396
	0.94084	0.960735	0.478693		0.997675	0.99754	0.499111		0.742682	1.19108	0.551916		0.250265	1.2459	0.574301
	0.942982	0.961227	0.478977		0.997809	0.999044	0.499408		0.742759	1.19158	0.552244		0.250744	1.24626	0.574642
	0.943142	0.961497	0.479261		0.999409	0.999288	0.499704		0.742883	1.19238	0.552571		0.251348	1.24708	0.574983
	0.943249	0.962182	0.479545		0.999449	0.999565	0.5		0.74302	1.19249	0.552899		0.251508	1.24737	0.575324
	0.943712	0.962717	0.47983		1.00055	1.00043	0.500296		0.744076	1.19283	0.553226		0.251533	1.24742	0.575665
	0.94414	0.962816	0.480114		1.00059	1.00078	0.500592		0.744261	1.19448	0.553554		0.25301	1.24833	0.576005
	0.944248	0.962865	0.480398		1.00303	1.00096	0.500889		0.744304	1.19648	0.553881		0.253015	1.25012	0.576346
	0.946798	0.962931	0.480682		1.00315	1.00119	0.501185		0.74444	1.19671	0.554209		0.253146	1.25027	0.576687
	0.948011	0.963786	0.480966		1.00424	1.00157	0.501481		0.744497	1.19741	0.554537		0.253226	1.25033	0.577028
	0.948861	0.965392	0.48125		1.00462	1.00226	0.501777		0.744505	1.19742	0.554864		0.253253	1.25247	0.577369
	0.949222	0.965537	0.481534		1.00501	1.00246	0.502073		0.744647	1.19881	0.555192		0.253883	1.25473	0.57771
	0.949647	0.965734	0.481818		1.00511	1.00346	0.50237		0.744717	1.20086	0.555519		0.254607	1.25549	0.57805
	0.94976	0.967039	0.482102		1.00524	1.00427	0.502666		0.74493	1.20109	0.555847		0.254814	1.25632	0.578391
	0.950888	0.967064	0.482386		1.00657	1.00535	0.502962		0.746014	1.20141	0.556174		0.255196	1.25666	0.578732
	0.951684	0.967492	0.48267		1.00872	1.00633	0.503258		0.746034	1.20214	0.556502		0.25543	1.25685	0.579073
	0.951931	0.967902	0.482955		1.00899	1.00684	0.503555		0.746912	1.20273	0.556829		0.255505	1.25694	0.579414
	0.952236	0.970119	0.483239		1.00978	1.00794	0.503851		0.747719	1.20363	0.557157		0.255628	1.25725	0.579755
	0.952823	0.970427	0.483523		1.01078	1.0081	0.504147		0.748484	1.20407	0.557484		0.256666	1.25905	0.580095
	0.953934	0.970433	0.483807		1.01108	1.00931	0.504443		0.748831	1.20573	0.557812		0.256806	1.25922	0.580436
	0.955352	0.970821	0.484091		1.01154	1.00954	0.504739		0.748883	1.20612	0.55814		0.256866	1.25934	0.580777
	0.955865	0.971286	0.484375		1.01162	1.00983	0.505036		0.748925	1.20688	0.558467		0.256872	1.25981	0.581118
	0.956361	0.972148	0.484659		1.01242	1.01043	0.505332		0.748925	1.20696	0.558795		0.25719	1.26066	0.581459
	0.956445	0.973617	0.484943		1.01373	1.01077	0.505628		0.749731	1.20801	0.559122		0.257807	1.26141	0.5818
	0.956644	0.973924	0.485227		1.01386	1.01111	0.505924		0.750096	1.20801	0.55945		0.257896	1.26387	0.58214
	0.9576	0.974492	0.485511		1.01392	1.01177	0.50622		0.750323	1.20815	0.559777		0.258169	1.26424	0.582481
	0.957776	0.974852	0.485795		1.01427	1.01488	0.506517		0.750959	1.20984	0.560105		0.25846	1.26513	0.582822
	0.957867	0.975949	0.48608		1.01515	1.01624	0.506813		0.752409	1.21306	0.560432		0.258505	1.26541	0.583163
	0.958372	0.976342	0.486364		1.01563	1.01642	0.507109		0.752643	1.21394	0.56076		0.259159	1.26563	0.583504
	0.958532	0.976449	0.486648		1.01605	1.01676	0.507405		0.75284	1.21427	0.561087		0.25916	1.26591	0.583845
	0.958977	0.976755	0.486932		1.01958	1.01722	0.507701		0.753289	1.2145	0.561415		0.259504	1.26605	0.584185
	0.959086	0.977245	0.487216		1.01985	1.01765	0.507998		0.754257	1.21483	0.561743		0.259544	1.26629	0.584526
	0.959806	0.977507	0.4875		1.02154	1.01804	0.508294		0.754343	1.21484	0.56207		0.259665	1.26827	0.584867
	0.962244	0.977597	0.487784		1.02161	1.01836	0.50859		0.755382	1.21554	0.562398		0.260004	1.26892	0.585208
	0.962446	0.977811	0.488068		1.02267	1.01892	0.508886		0.756387	1.21922	0.562725		0.26017	1.26953	0.585549
	0.962732	0.978555	0.488352		1.02275	1.01896	0.509182		0.756677	1.21926	0.563053		0.260326	1.27063	0.58589
	0.962748	0.978627	0.488636		1.02292	1.01899	0.509479		0.756857	1.21948	0.56338		0.260474	1.27347	0.58623
	0.963212	0.979254	0.48892		1.02339	1.0213	0.509775		0.75749	1.22012	0.563708		0.26095	1.27392	0.586571
	0.963297	0.979346	0.489205		1.02396	1.02131	0.510071		0.758178	1.22027	0.564035		0.26134	1.27421	0.586912
	0.963593	0.980465	0.489489		1.02415	1.0223	0.510367		0.758653	1.22036	0.564363		0.261384	1.27483	0.587253
	0.96529	0.980753	0.489773		1.02613	1.02242	0.510664		0.761202	1.2217	0.56469		0.261427	1.27659	0.587594
	0.965651	0.981456	0.490057		1.02627	1.02259	0.51096		0.76154	1.222	0.565018		0.261473	1.27715	0.587935
	0.966033	0.981537	0.490341		1.02679	1.02288	0.511256		0.762306	1.22243	0.565346		0.261747	1.27748	0.588275
	0.966741	0.98306	0.490625		1.02682	1.02328	0.511552		0.762341	1.22305	0.565673		0.262285	1.28015	0.588616
	0.967499	0.983094	0.490909		1.0269	1.02347	0.511848		0.762546	1.22403	0.566001		0.262479	1.28029	0.588957
	0.967979	0.983173	0.491193		1.02715	1.0241	0.512145		0.762701	1.22411	0.566328		0.262879	1.28069	0.589298
	0.96853	0.983385	0.491477		1.02736	1.02438	0.512441		0.762992	1.22412	0.566656		0.262883	1.28109	0.589639
	0.968734	0.984109	0.491761		1.02753	1.0254	0.512737		0.764633	1.22433	0.566983		0.262911	1.28132	0.58998
	0.970916	0.98443	0.492045		1.02767	1.02595	0.513033		0.765656	1.22532	0.567311		0.262972	1.28171	0.59032
	0.971186	0.984502	0.49233		1.02845	1.02669	0.513329		0.766377	1.22568	0.567638		0.263243	1.28185	0.590661
	0.973301	0.98465	0.492614		1.02906	1.02672	0.513626		0.766423	1.22963	0.567966		0.26338	1.28366	0.591002
	0.974228	0.985339	0.492898		1.03178	1.03081	0.513922		0.766647	1.22993	0.568293		0.263436	1.28411	0.591343
	0.975604	0.985455	0.493182		1.03237	1.03187	0.514218		0.767988	1.23099	0.568621		0.263471	1.28533	0.591684
	0.975917	0.985763	0.493466		1.03275	1.03302	0.514514		0.769795	1.23365	0.568949		0.26363	1.28643	0.592025
	0.97604	0.985805	0.49375		1.03275	1.03356	0.51481		0.774613	1.2339	0.569276		0.26424	1.28808	0.592365
	0.977884	0.985933	0.494034		1.03396	1.03358	0.515107		0.774639	1.2339	0.569604		0.264602	1.28969	0.592706
	0.978053	0.986619	0.494318		1.03418	1.03384	0.515403		0.774826	1.23446	0.569931		0.264677	1.29116	0.593047
	0.978282	0.987558	0.494602		1.03618	1.03385	0.515699		0.77531	1.23594	0.570259		0.264848	1.29135	0.593388
	0.978386	0.988575	0.494886		1.03632	1.03496	0.515995		0.776919	1.23912	0.570586		0.265259	1.29205	0.593729
	0.979095	0.9886	0.49517		1.03703	1.03504	0.516291		0.777871	1.23987	0.570914		0.26605	1.29264	0.59407
	0.98066	0.988682	0.495455		1.03758	1.03551	0.516588		0.777949	1.24006	0.571241		0.266153	1.29267	0.59441
	0.981423	0.988927	0.495739		1.03819	1.03579	0.516884		0.777961	1.24062	0.571569		0.266508	1.29304	0.594751
	0.981506	0.990243	0.496023		1.03875	1.03624	0.51718		0.779645	1.24192	0.571896		0.266644	1.29405	0.595092
	0.98313	0.990654	0.496307		1.04	1.03628	0.517476		0.779658	1.24256	0.572224		0.266743	1.29628	0.595433
	0.983684	0.991032	0.496591		1.04085	1.04179	0.517773		0.781295	1.24294	0.572552		0.267383	1.2982	0.595774
	0.985844	0.991563	0.496875		1.0415	1.04233	0.518069		0.782275	1.24789	0.572879		0.267708	1.29857	0.596115
	0.987342	0.992078	0.497159		1.04272	1.04236	0.518365		0.782818	1.25083	0.573207		0.267741	1.29892	0.596455
	0.988094	0.99361	0.497443		1.04286	1.04295	0.518661		0.782964	1.25149	0.573534		0.268045	1.3026	0.596796
	0.988164	0.993884	0.497727		1.0433	1.04318	0.518957		0.783581	1.25151	0.573862		0.26848	1.30262	0.597137
	0.988866	0.994257	0.498011		1.04389	1.04323	0.519254		0.7838	1.25158	0.574189		0.268627	1.30276	0.597478
	0.988868	0.996855	0.498295		1.04532	1.04349	0.51955		0.784998	1.25173	0.574517		0.269377	1.30278	0.597819
	0.995189	0.99785	0.49858		1.04544	1.04457	0.519846		0.785113	1.25453	0.574844		0.269949	1.30564	0.59816
	0.995827	0.9979	0.498864		1.04624	1.04477	0.520142		0.785758	1.26045	0.575172		0.270059	1.30568	0.5985
	0.996835	0.998389	0.499148		1.04725	1.04696	0.520438		0.786095	1.26129	0.5755		0.27021	1.30569	0.598841
	0.996998	0.999138	0.499432		1.04801	1.04769	0.520735		0.786878	1.26249	0.575827		0.270217	1.30616	0.599182
	0.997445	0.99936	0.499716		1.04966	1.04835	0.521031		0.787126	1.26331	0.576155		0.270362	1.30636	0.599523
	0.997671	0.999495	0.5		1.04975	1.04945	0.521327		0.787726	1.26341	0.576482		0.270532	1.30837	0.599864
	1.00233	1.0005	0.500284		1.05052	1.05059	0.521623		0.788226	1.26513	0.57681		0.270691	1.30869	0.600204
	1.00237	1.00064	0.500568		1.05145	1.05109	0.521919		0.788695	1.26545	0.577137		0.270904	1.3114	0.600545
	1.00255	1.00084	0.500852		1.05167	1.05142	0.522216		0.788823	1.26563	0.577465		0.271862	1.31195	0.600886
	1.00331	1.00266	0.501136		1.0519	1.05144	0.522512		0.789078	1.26583	0.577792		0.271961	1.31228	0.601227
	1.00681	1.00346	0.50142		1.05198	1.05179	0.522808		0.789105	1.26598	0.57812		0.271966	1.31248	0.601568
	1.00734	1.0039	0.501705		1.05213	1.05182	0.523104		0.789294	1.26689	0.578447		0.272054	1.31476	0.601909
	1.00977	1.00553	0.501989		1.05405	1.05243	0.5234		0.789495	1.26821	0.578775		0.272153	1.31593	0.602249
	1.01053	1.0068	0.502273		1.05415	1.05304	0.523697		0.789585	1.26878	0.579103		0.272375	1.31603	0.60259
	1.01149	1.00875	0.502557		1.0548	1.0543	0.523993		0.790339	1.26967	0.57943		0.273193	1.31702	0.602931
	1.01202	1.00883	0.502841		1.05564	1.05514	0.524289		0.790877	1.27135	0.579758		0.273364	1.31707	0.603272
	1.01364	1.00989	0.503125		1.05639	1.05579	0.524585		0.790987	1.2714	0.580085		0.273393	1.31716	0.603613
	1.01372	1.01086	0.503409		1.05641	1.05657	0.524882		0.791484	1.27143	0.580413		0.273489	1.32015	0.603954
	1.01529	1.01136	0.503693		1.05734	1.0572	0.525178		0.79227	1.27157	0.58074		0.273737	1.32053	0.604294
	1.01529	1.01169	0.503977		1.0578	1.05739	0.525474		0.793341	1.27217	0.581068		0.273926	1.32219	0.604635
	1.01615	1.01213	0.504261		1.05831	1.05808	0.52577		0.793655	1.27219	0.581395		0.274363	1.32323	0.604976
	1.01816	1.0128	0.504545		1.05873	1.05813	0.526066		0.795709	1.27234	0.581723		0.274448	1.32457	0.605317
	1.01891	1.01286	0.50483		1.05995	1.05873	0.526363		0.797192	1.27347	0.58205		0.275091	1.32481	0.605658
	1.01973	1.0132	0.505114		1.05998	1.059	0.526659		0.797554	1.2736	0.582378		0.275132	1.32518	0.605999
	1.02074	1.0136	0.505398		1.06095	1.05931	0.526955		0.797574	1.2745	0.582706		0.275321	1.32547	0.606339
	1.0213	1.01437	0.505682		1.06217	1.0596	0.527251		0.797667	1.2754	0.583033		0.275352	1.32637	0.60668
	1.02145	1.01439	0.505966		1.06217	1.05975	0.527547		0.797988	1.27568	0.583361		0.275424	1.32677	0.607021
	1.02185	1.01506	0.50625		1.06316	1.06052	0.527844		0.798898	1.27636	0.583688		0.275547	1.33085	0.607362
	1.02226	1.01575	0.506534		1.06362	1.06081	0.52814		0.799799	1.27767	0.584016		0.275595	1.33125	0.607703
	1.0228	1.01584	0.506818		1.06383	1.06083	0.528436		0.800814	1.27778	0.584343		0.27575	1.33318	0.608044
	1.02339	1.01642	0.507102		1.06398	1.06122	0.528732		0.801877	1.27783	0.584671		0.276203	1.33548	0.608384
	1.02359	1.01663	0.507386		1.06447	1.06171	0.529028		0.802329	1.27829	0.584998		0.276551	1.33551	0.608725
	1.02429	1.01723	0.50767		1.06492	1.06225	0.529325		0.803661	1.27843	0.585326		0.276611	1.33583	0.609066
	1.02522	1.01777	0.507955		1.06521	1.06365	0.529621		0.804076	1.27951	0.585653		0.276926	1.33745	0.609407
	1.02582	1.01856	0.508239		1.06613	1.06404	0.529917		0.806003	1.28029	0.585981		0.278466	1.33816	0.609748
	1.02596	1.02151	0.508523		1.06639	1.06474	0.530213		0.806413	1.28105	0.586309		0.278525	1.3385	0.610089
	1.0269	1.0216	0.508807		1.06649	1.06496	0.530509		0.807231	1.28152	0.586636		0.278615	1.33972	0.610429
	1.02832	1.0216	0.509091		1.06663	1.06622	0.530806		0.808222	1.28243	0.586964		0.278631	1.34082	0.61077
	1.02919	1.02176	0.509375		1.06698	1.06636	0.531102		0.809992	1.28274	0.587291		0.279401	1.34279	0.611111
	1.03362	1.02193	0.509659		1.06765	1.06652	0.531398		0.810194	1.28312	0.587619		0.279402	1.34347	0.611452
	1.03469	1.02205	0.509943		1.06883	1.06829	0.531694		0.81056	1.28418	0.587946		0.279765	1.34351	0.611793
	1.03494	1.02212	0.510227		1.06946	1.06864	0.531991		0.811824	1.2876	0.588274		0.279859	1.34412	0.612134
	1.0357	1.02214	0.510511		1.07052	1.06914	0.532287		0.812021	1.28781	0.588601		0.280415	1.34521	0.612474
	1.03634	1.02242	0.510795		1.07286	1.06918	0.532583		0.812194	1.28837	0.588929		0.280864	1.34563	0.612815
	1.03648	1.02279	0.51108		1.07315	1.06946	0.532879		0.81428	1.28862	0.589256		0.281024	1.34594	0.613156
	1.03654	1.02291	0.511364		1.07353	1.07073	0.533175		0.815473	1.2896	0.589584		0.281965	1.34643	0.613497
	1.03665	1.02344	0.511648		1.0736	1.0708	0.533472		0.815801	1.29058	0.589912		0.282036	1.34658	0.613838
	1.03881	1.0235	0.511932		1.07368	1.07185	0.533768		0.816223	1.29317	0.590239		0.282076	1.34794	0.614179
	1.0389	1.02363	0.512216		1.07508	1.07258	0.534064		0.816295	1.29395	0.590567		0.282188	1.34813	0.614519
	1.0398	1.02437	0.5125		1.07538	1.07262	0.53436		0.817944	1.29453	0.590894		0.283344	1.34977	0.61486
	1.04111	1.0247	0.512784		1.07613	1.07387	0.534656		0.819913	1.29465	0.591222		0.28374	1.35022	0.615201
	1.04221	1.0254	0.513068		1.07637	1.07559	0.534953		0.820034	1.29702	0.591549		0.283866	1.35067	0.615542
	1.04285	1.02542	0.513352		1.0775	1.07663	0.535249		0.820375	1.30094	0.591877		0.283951	1.35188	0.615883
	1.043	1.02675	0.513636		1.07761	1.07665	0.535545		0.820477	1.30188	0.592204		0.284601	1.35258	0.616224
	1.04397	1.02784	0.51392		1.07981	1.07694	0.535841		0.820874	1.30345	0.592532		0.285078	1.35305	0.616564
	1.04413	1.02808	0.514205		1.08092	1.07702	0.536137		0.821513	1.30566	0.592859		0.285155	1.35454	0.616905
	1.04413	1.02825	0.514489		1.08124	1.07863	0.536434		0.822223	1.30794	0.593187		0.285165	1.35462	0.617246
	1.04582	1.02898	0.514773		1.08214	1.07895	0.53673		0.822618	1.30916	0.593515		0.28536	1.35552	0.617587
	1.04743	1.02898	0.515057		1.08278	1.07933	0.537026		0.824963	1.30926	0.593842		0.28552	1.3564	0.617928
	1.04772	1.03017	0.515341		1.08281	1.07974	0.537322		0.825209	1.3094	0.59417		0.285965	1.35647	0.618269
	1.04806	1.03031	0.515625		1.08299	1.07983	0.537618		0.82529	1.30967	0.594497		0.285979	1.35826	0.618609
	1.04858	1.03301	0.515909		1.08484	1.07994	0.537915		0.825706	1.30969	0.594825		0.286314	1.35947	0.61895
	1.04959	1.03321	0.516193		1.08484	1.08034	0.538211		0.825714	1.31061	0.595152		0.286395	1.36245	0.619291
	1.05085	1.03353	0.516477		1.08562	1.08084	0.538507		0.826472	1.31132	0.59548		0.286502	1.36298	0.619632
	1.05095	1.03379	0.516761		1.08745	1.08115	0.538803		0.827294	1.31479	0.595807		0.28667	1.36344	0.619973
	1.05095	1.03396	0.517045		1.088	1.08161	0.5391		0.827807	1.31545	0.596135		0.28676	1.36391	0.620314
	1.05189	1.03447	0.51733		1.08804	1.08193	0.539396		0.828033	1.31582	0.596462		0.287202	1.36457	0.620654
	1.05345	1.03482	0.517614		1.08923	1.08275	0.539692		0.830536	1.31625	0.59679		0.287331	1.37039	0.620995
	1.05505	1.0355	0.517898		1.08924	1.08302	0.539988		0.830753	1.31807	0.597118		0.287497	1.37051	0.621336
	1.05665	1.03577	0.518182		1.08953	1.08381	0.540284		0.834417	1.31931	0.597445		0.287847	1.37069	0.621677
	1.05692	1.03607	0.518466		1.0915	1.08385	0.540581		0.834557	1.31967	0.597773		0.287932	1.37147	0.622018
	1.05693	1.03655	0.51875		1.09156	1.08541	0.540877		0.83463	1.32046	0.5981		0.288004	1.37206	0.622359
	1.05786	1.03692	0.519034		1.09178	1.08597	0.541173		0.835601	1.32157	0.598428		0.288341	1.37315	0.622699
	1.05842	1.03785	0.519318		1.09364	1.08711	0.541469		0.836853	1.32239	0.598755		0.288431	1.37414	0.62304
	1.05915	1.03916	0.519602		1.09399	1.08793	0.541765		0.838097	1.32403	0.599083		0.288492	1.37479	0.623381
	1.05922	1.04	0.519886		1.09524	1.08811	0.542062		0.838443	1.32561	0.59941		0.288861	1.37484	0.623722
	1.05966	1.04052	0.52017		1.096	1.08864	0.542358		0.838813	1.3258	0.599738		0.288862	1.37525	0.624063
	1.06013	1.04115	0.520455		1.09663	1.08997	0.542654		0.839487	1.32633	0.600066		0.288872	1.37627	0.624404
	1.06056	1.04131	0.520739		1.09715	1.09044	0.54295		0.839694	1.33122	0.600393		0.289031	1.37708	0.624744
	1.06068	1.04176	0.521023		1.09805	1.09061	0.543246		0.840616	1.33178	0.600721		0.289032	1.37772	0.625085
	1.06415	1.04209	0.521307		1.09862	1.09157	0.543543		0.841586	1.33232	0.601048		0.289514	1.37933	0.625426
	1.06498	1.04238	0.521591		1.09871	1.09206	0.543839		0.842597	1.33478	0.601376		0.290087	1.37961	0.625767
	1.06512	1.04273	0.521875		1.10029	1.09272	0.544135		0.843537	1.33612	0.601703		0.290619	1.38245	0.626108
	1.06512	1.04323	0.522159		1.10091	1.09307	0.544431		0.843991	1.33632	0.602031		0.290856	1.38264	0.626449
	1.06662	1.04366	0.522443		1.10123	1.09309	0.544727		0.844138	1.33637	0.602358		0.290884	1.38364	0.626789
	1.06682	1.04578	0.522727		1.10135	1.09349	0.545024		0.844365	1.33662	0.602686		0.290948	1.38404	0.62713
	1.06722	1.04619	0.523011		1.10334	1.0935	0.54532		0.844862	1.34364	0.603013		0.291576	1.38478	0.627471
	1.06843	1.0475	0.523295		1.10493	1.09422	0.545616		0.845123	1.34432	0.603341		0.291674	1.38556	0.627812
	1.06877	1.04816	0.52358		1.10522	1.09477	0.545912		0.846396	1.34501	0.603669		0.292373	1.38678	0.628153
	1.06896	1.04949	0.523864		1.10534	1.09495	0.546209		0.847863	1.34787	0.603996		0.292683	1.38704	0.628494
	1.06911	1.05043	0.524148		1.1059	1.09516	0.546505		0.849844	1.34882	0.604324		0.293093	1.38705	0.628834
	1.06919	1.05096	0.524432		1.10634	1.09529	0.546801		0.849848	1.3506	0.604651		0.293356	1.38717	0.629175
	1.07176	1.05183	0.524716		1.10743	1.09598	0.547097		0.850516	1.3511	0.604979		0.293463	1.38734	0.629516
	1.07292	1.05257	0.525		1.10768	1.09629	0.547393		0.850978	1.35299	0.605306		0.29348	1.38749	0.629857
	1.07295	1.0533	0.525284		1.10774	1.09686	0.54769		0.851481	1.35331	0.605634		0.293633	1.38794	0.630198
	1.07333	1.05338	0.525568		1.10829	1.09696	0.547986		0.8519	1.35463	0.605961		0.293786	1.38884	0.630539
	1.0737	1.05354	0.525852		1.11014	1.09706	0.548282		0.852789	1.35605	0.606289		0.294029	1.38892	0.630879
	1.07387	1.05403	0.526136		1.1109	1.09755	0.548578		0.853037	1.35691	0.606616		0.294059	1.38916	0.63122
	1.07439	1.05482	0.52642		1.11136	1.0977	0.548874		0.853202	1.35732	0.606944		0.294191	1.38996	0.631561
	1.07444	1.05513	0.526705		1.11288	1.09894	0.549171		0.85548	1.35842	0.607272		0.29435	1.39166	0.631902
	1.07507	1.05529	0.526989		1.11291	1.09901	0.549467		0.856115	1.35954	0.607599		0.294668	1.3926	0.632243
	1.07595	1.05592	0.527273		1.11304	1.09917	0.549763		0.856237	1.36201	0.607927		0.294713	1.39272	0.632584
	1.07634	1.05625	0.527557		1.11377	1.09926	0.550059		0.856317	1.36276	0.608254		0.294743	1.3936	0.632924
	1.07789	1.05681	0.527841		1.11386	1.10121	0.550355		0.856787	1.3659	0.608582		0.294776	1.39555	0.633265
	1.07832	1.05727	0.528125		1.1143	1.10164	0.550652		0.856971	1.36726	0.608909		0.295526	1.3977	0.633606
	1.07914	1.05811	0.528409		1.11985	1.10207	0.550948		0.857364	1.36735	0.609237		0.296058	1.39784	0.633947
	1.07929	1.05884	0.528693		1.12091	1.10244	0.551244		0.857371	1.36973	0.609564		0.296555	1.40048	0.634288
	1.08063	1.05942	0.528977		1.12161	1.1025	0.55154		0.858924	1.36978	0.609892		0.296603	1.40061	0.634628
	1.08135	1.06112	0.529261		1.12162	1.10263	0.551836		0.858927	1.37034	0.610219		0.297188	1.40456	0.634969
	1.08171	1.06115	0.529545		1.12275	1.10297	0.552133		0.859373	1.37036	0.610547		0.29845	1.40691	0.63531
	1.08183	1.06362	0.52983		1.12386	1.10351	0.552429		0.85942	1.37238	0.610875		0.299246	1.40857	0.635651
	1.08231	1.0644	0.530114		1.12407	1.10442	0.552725		0.85942	1.37351	0.611202		0.299306	1.40867	0.635992
	1.08294	1.06468	0.530398		1.12545	1.1061	0.553021		0.86068	1.37372	0.61153		0.299675	1.40914	0.636333
	1.08304	1.0647	0.530682		1.12619	1.10719	0.553318		0.861233	1.37391	0.611857		0.299893	1.41077	0.636673
	1.08564	1.06625	0.530966		1.12675	1.11076	0.553614		0.861371	1.37396	0.612185		0.300091	1.41274	0.637014
	1.0862	1.06688	0.53125		1.12773	1.11317	0.55391		0.862617	1.37488	0.612512		0.30053	1.41347	0.637355
	1.08646	1.06756	0.531534		1.12815	1.11345	0.554206		0.862903	1.37553	0.61284		0.300662	1.41475	0.637696
	1.08674	1.06788	0.531818		1.12903	1.11486	0.554502		0.863229	1.37607	0.613167		0.300819	1.41636	0.638037
	1.08698	1.06881	0.532102		1.13203	1.11553	0.554799		0.865065	1.37674	0.613495		0.301406	1.41646	0.638378
	1.08778	1.0696	0.532386		1.1328	1.1182	0.555095		0.865288	1.37782	0.613822		0.30165	1.41738	0.638718
	1.08849	1.07064	0.53267		1.13302	1.1187	0.555391		0.865329	1.37868	0.61415		0.3022	1.42005	0.639059
	1.08892	1.07119	0.532955		1.13302	1.11871	0.555687		0.867409	1.37898	0.614478		0.302447	1.42075	0.6394
	1.09085	1.07194	0.533239		1.13525	1.11908	0.555983		0.867537	1.37908	0.614805		0.302689	1.42191	0.639741
	1.09155	1.07211	0.533523		1.13552	1.11962	0.55628		0.867645	1.37922	0.615133		0.302845	1.42313	0.640082
	1.09282	1.07224	0.533807		1.13574	1.11982	0.556576		0.868642	1.38053	0.61546		0.303213	1.42341	0.640423
	1.09353	1.07244	0.534091		1.13584	1.12016	0.556872		0.868789	1.38138	0.615788		0.303228	1.42372	0.640763
	1.09364	1.07292	0.534375		1.13609	1.12177	0.557168		0.868892	1.38185	0.616115		0.303281	1.4238	0.641104
	1.09386	1.07302	0.534659		1.13713	1.12299	0.557464		0.86934	1.38215	0.616443		0.303374	1.42433	0.641445
	1.09522	1.07353	0.534943		1.13798	1.12365	0.557761		0.869369	1.38255	0.61677		0.303532	1.42467	0.641786
	1.09602	1.07407	0.535227		1.13872	1.12389	0.558057		0.871042	1.384	0.617098		0.303989	1.42787	0.642127
	1.09602	1.07553	0.535511		1.13881	1.12423	0.558353		0.871705	1.38552	0.617425		0.304166	1.42856	0.642468
	1.09604	1.0765	0.535795		1.14049	1.12528	0.558649		0.8718	1.38688	0.617753		0.304185	1.42947	0.642808
	1.09782	1.07784	0.53608		1.14183	1.12601	0.558945		0.871834	1.38796	0.618081		0.305129	1.43069	0.643149
	1.09787	1.07788	0.536364		1.14354	1.12623	0.559242		0.872692	1.38849	0.618408		0.305323	1.43144	0.64349
	1.09845	1.07821	0.536648		1.14408	1.12638	0.559538		0.873148	1.38873	0.618736		0.305383	1.43169	0.643831
	1.09848	1.07883	0.536932		1.14481	1.12652	0.559834		0.873282	1.38904	0.619063		0.305757	1.4323	0.644172
	1.09924	1.07893	0.537216		1.14604	1.12792	0.56013		0.874051	1.38918	0.619391		0.305871	1.43261	0.644513
	1.09978	1.07948	0.5375		1.1477	1.12807	0.560427		0.876454	1.39061	0.619718		0.306186	1.43279	0.644853
	1.0999	1.08056	0.537784		1.14858	1.1284	0.560723		0.878258	1.39072	0.620046		0.306531	1.43397	0.645194
	1.10063	1.08115	0.538068		1.14945	1.12959	0.561019		0.879507	1.39124	0.620373		0.307206	1.43441	0.645535
	1.10173	1.08125	0.538352		1.14989	1.13019	0.561315		0.879865	1.39293	0.620701		0.307372	1.43672	0.645876
	1.10493	1.0821	0.538636		1.14999	1.13033	0.561611		0.880014	1.39306	0.621028		0.307796	1.43867	0.646217
	1.10638	1.08323	0.53892		1.1506	1.13035	0.561908		0.881575	1.39505	0.621356		0.307859	1.43872	0.646558
	1.10788	1.08409	0.539205		1.15268	1.13043	0.562204		0.88185	1.39667	0.621684		0.308303	1.43923	0.646898
	1.10891	1.0842	0.539489		1.153	1.13109	0.5625		0.881988	1.3975	0.622011		0.30882	1.43948	0.647239
	1.10918	1.08439	0.539773		1.15332	1.13238	0.562796		0.882682	1.39804	0.622339		0.309149	1.43986	0.64758
	1.1093	1.08485	0.540057		1.15347	1.13363	0.563092		0.883065	1.40035	0.622666		0.310406	1.44132	0.647921
	1.11071	1.08603	0.540341		1.15548	1.13374	0.563389		0.884213	1.40148	0.622994		0.310986	1.44332	0.648262
	1.11133	1.08622	0.540625		1.15579	1.13475	0.563685		0.8846	1.40193	0.623321		0.311147	1.44432	0.648603
	1.11337	1.08799	0.540909		1.15721	1.13507	0.563981		0.88721	1.40236	0.623649		0.311216	1.44475	0.648943
	1.11364	1.08911	0.541193		1.15744	1.13606	0.564277		0.887221	1.40265	0.623976		0.311647	1.44482	0.649284
	1.11503	1.09032	0.541477		1.15902	1.13615	0.564573		0.88763	1.40374	0.624304		0.311733	1.44531	0.649625
	1.11527	1.09069	0.541761		1.16271	1.13703	0.56487		0.887669	1.4059	0.624632		0.311889	1.44651	0.649966
	1.11735	1.09103	0.542045		1.16283	1.1376	0.565166		0.888384	1.40728	0.624959		0.311934	1.44757	0.650307
	1.11865	1.09109	0.54233		1.16286	1.13786	0.565462		0.88849	1.4076	0.625287		0.311937	1.451	0.650648
	1.11932	1.09252	0.542614		1.16321	1.13817	0.565758		0.890361	1.40808	0.625614		0.31209	1.45457	0.650988
	1.11997	1.09386	0.542898		1.16388	1.13822	0.566055		0.890981	1.40839	0.625942		0.312372	1.45468	0.651329
	1.12075	1.0942	0.543182		1.16663	1.13976	0.566351		0.892361	1.40896	0.626269		0.312373	1.45647	0.65167
	1.12098	1.09459	0.543466		1.16663	1.14003	0.566647		0.892425	1.40916	0.626597		0.31252	1.45834	0.652011
	1.12111	1.09522	0.54375		1.17135	1.14034	0.566943		0.892473	1.41043	0.626924		0.3129	1.45957	0.652352
	1.12194	1.09545	0.544034		1.17197	1.14133	0.567239		0.892574	1.41307	0.627252		0.313043	1.4597	0.652693
	1.12227	1.09555	0.544318		1.17235	1.14181	0.567536		0.893162	1.41358	0.627579		0.313188	1.46116	0.653033
	1.12233	1.09655	0.544602		1.17276	1.14205	0.567832		0.894894	1.41411	0.627907		0.313353	1.46145	0.653374
	1.12275	1.09906	0.544886		1.1731	1.14276	0.568128		0.895553	1.41599	0.628235		0.313421	1.46184	0.653715
	1.12293	1.09929	0.54517		1.17321	1.14302	0.568424		0.896557	1.41622	0.628562		0.313512	1.46209	0.654056
	1.12412	1.09938	0.545455		1.17331	1.14459	0.56872		0.89895	1.41686	0.62889		0.314232	1.46767	0.654397
	1.12414	1.0996	0.545739		1.17421	1.14479	0.569017		0.899267	1.41709	0.629217		0.314315	1.46779	0.654738
	1.12535	1.09991	0.546023		1.17479	1.14581	0.569313		0.900199	1.4175	0.629545		0.314665	1.46897	0.655078
	1.12536	1.10013	0.546307		1.17613	1.14639	0.569609		0.901122	1.41912	0.629872		0.314665	1.46972	0.655419
	1.12563	1.10024	0.546591		1.17943	1.1464	0.569905		0.90131	1.41991	0.6302		0.314668	1.47106	0.65576
	1.12564	1.10025	0.546875		1.18032	1.14741	0.570201		0.902498	1.42002	0.630527		0.315063	1.4725	0.656101
	1.12667	1.10219	0.547159		1.181	1.14768	0.570498		0.90289	1.42011	0.630855		0.315291	1.47253	0.656442
	1.12719	1.10259	0.547443		1.18505	1.14932	0.570794		0.902972	1.42064	0.631182		0.315616	1.47255	0.656783
	1.13247	1.10432	0.547727		1.18645	1.15	0.57109		0.904372	1.42206	0.63151		0.315845	1.4754	0.657123
	1.13484	1.10455	0.548011		1.187	1.15166	0.571386		0.904429	1.42382	0.631838		0.316037	1.47672	0.657464
	1.13502	1.1055	0.548295		1.1872	1.15188	0.571682		0.904494	1.42448	0.632165		0.31616	1.4768	0.657805
	1.13568	1.10606	0.54858		1.18762	1.15208	0.571979		0.905206	1.42729	0.632493		0.316162	1.47769	0.658146
	1.13586	1.10622	0.548864		1.18828	1.15283	0.572275		0.905324	1.43007	0.63282		0.316295	1.47985	0.658487
	1.13716	1.10662	0.549148		1.19024	1.153	0.572571		0.905842	1.43104	0.633148		0.316385	1.4808	0.658828
	1.13757	1.10683	0.549432		1.19046	1.15374	0.572867		0.90715	1.43218	0.633475		0.316704	1.48096	0.659168
	1.13771	1.10692	0.549716		1.19099	1.1545	0.573164		0.908397	1.4323	0.633803		0.31723	1.48203	0.659509
	1.13805	1.10732	0.55		1.19111	1.15529	0.57346		0.908894	1.43507	0.63413		0.317262	1.48206	0.65985
	1.13818	1.10749	0.550284		1.19119	1.15558	0.573756		0.909711	1.43753	0.634458		0.31761	1.48257	0.660191
	1.13911	1.1075	0.550568		1.19258	1.15802	0.574052		0.910219	1.43823	0.634785		0.317664	1.48365	0.660532
	1.13945	1.10775	0.550852		1.19335	1.15991	0.574348		0.910291	1.43977	0.635113		0.317891	1.48712	0.660873
	1.14031	1.11029	0.551136		1.19337	1.16125	0.574645		0.911598	1.44028	0.635441		0.317991	1.48746	0.661213
	1.14096	1.1109	0.55142		1.19481	1.16194	0.574941		0.91218	1.44047	0.635768		0.318274	1.48978	0.661554
	1.14133	1.11189	0.551705		1.19775	1.16218	0.575237		0.91484	1.44171	0.636096		0.318304	1.48988	0.661895
	1.14189	1.11289	0.551989		1.19794	1.16341	0.575533		0.915006	1.44554	0.636423		0.318417	1.49347	0.662236
	1.14378	1.11356	0.552273		1.19819	1.16401	0.575829		0.916686	1.44732	0.636751		0.318428	1.49456	0.662577
	1.14401	1.11364	0.552557		1.19852	1.16546	0.576126		0.917111	1.44962	0.637078		0.318443	1.49528	0.662918
	1.14692	1.11376	0.552841		1.20006	1.16623	0.576422		0.917767	1.45019	0.637406		0.318629	1.49723	0.663258
	1.14739	1.11423	0.553125		1.2033	1.16711	0.576718		0.918151	1.45146	0.637733		0.318667	1.49897	0.663599
	1.14821	1.11549	0.553409		1.20589	1.16718	0.577014		0.918998	1.45258	0.638061		0.318885	1.49955	0.66394
	1.14937	1.11596	0.553693		1.20805	1.16768	0.57731		0.919105	1.45341	0.638388		0.319022	1.50038	0.664281
	1.15043	1.11687	0.553977		1.20815	1.16949	0.577607		0.919993	1.45614	0.638716		0.319245	1.50084	0.664622
	1.153	1.11751	0.554261		1.20822	1.16985	0.577903		0.920308	1.4563	0.639044		0.319342	1.50106	0.664963
	1.15308	1.11775	0.554545		1.20873	1.17004	0.578199		0.920489	1.45673	0.639371		0.319736	1.50127	0.665303
	1.15407	1.11794	0.55483		1.2089	1.17066	0.578495		0.920903	1.45697	0.639699		0.319746	1.50233	0.665644
	1.1545	1.11855	0.555114		1.20952	1.17118	0.578791		0.921659	1.45717	0.640026		0.319962	1.50348	0.665985
	1.15606	1.11893	0.555398		1.21076	1.17284	0.579088		0.921948	1.46169	0.640354		0.319989	1.50466	0.666326
	1.1568	1.1198	0.555682		1.21122	1.17287	0.579384		0.922094	1.46196	0.640681		0.320282	1.50503	0.666667
	1.15694	1.12181	0.555966		1.21206	1.17327	0.57968		0.923196	1.46275	0.641009		0.320299	1.50541	0.667007
	1.15699	1.12332	0.55625		1.2127	1.17401	0.579976		0.9234	1.46547	0.641336		0.320534	1.50609	0.667348
	1.1571	1.12406	0.556534		1.21568	1.17412	0.580273		0.923402	1.46823	0.641664		0.320622	1.50629	0.667689
	1.15849	1.1243	0.556818		1.21785	1.17429	0.580569		0.924913	1.46828	0.641991		0.320651	1.50683	0.66803
	1.16289	1.12506	0.557102		1.21903	1.17445	0.580865		0.925173	1.47164	0.642319		0.320712	1.50796	0.668371
	1.16343	1.12557	0.557386		1.21906	1.1746	0.581161		0.925684	1.47487	0.642647		0.32111	1.50839	0.668712
	1.16448	1.12557	0.55767		1.2242	1.17513	0.581457		0.927309	1.47571	0.642974		0.321234	1.51026	0.669052
	1.16643	1.1256	0.557955		1.2243	1.17548	0.581754		0.928149	1.47734	0.643302		0.321449	1.51108	0.669393
	1.1683	1.12626	0.558239		1.22631	1.17726	0.58205		0.928573	1.47772	0.643629		0.321713	1.51153	0.669734
	1.16942	1.12672	0.558523		1.22771	1.17825	0.582346		0.928604	1.47804	0.643957		0.32182	1.513	0.670075
	1.17171	1.12703	0.558807		1.23231	1.17866	0.582642		0.930573	1.47897	0.644284		0.322037	1.51326	0.670416
	1.17253	1.1282	0.559091		1.23248	1.17895	0.582938		0.931184	1.4795	0.644612		0.322723	1.51407	0.670757
	1.17265	1.12882	0.559375		1.23333	1.1798	0.583235		0.931567	1.47989	0.644939		0.322915	1.5149	0.671097
	1.17383	1.12972	0.559659		1.23339	1.18018	0.583531		0.932669	1.48017	0.645267		0.323321	1.51854	0.671438
	1.17413	1.13064	0.559943		1.23372	1.18061	0.583827		0.933723	1.4804	0.645594		0.324301	1.51994	0.671779
	1.17574	1.13086	0.560227		1.23466	1.18063	0.584123		0.93475	1.48218	0.645922		0.324333	1.51996	0.67212
	1.17577	1.13173	0.560511		1.23512	1.18221	0.584419		0.936973	1.48303	0.64625		0.324341	1.52082	0.672461
	1.17662	1.1325	0.560795		1.23873	1.18339	0.584716		0.937049	1.48343	0.646577		0.324496	1.52251	0.672802
	1.17668	1.13257	0.56108		1.23888	1.18407	0.585012		0.937484	1.4863	0.646905		0.324577	1.52253	0.673142
	1.17683	1.13259	0.561364		1.23962	1.18429	0.585308		0.938199	1.49248	0.647232		0.32461	1.52291	0.673483
	1.17857	1.13284	0.561648		1.24033	1.18514	0.585604		0.938272	1.49374	0.64756		0.324737	1.52302	0.673824
	1.17993	1.13325	0.561932		1.2406	1.18532	0.5859		0.938635	1.49429	0.647887		0.324917	1.52439	0.674165
	1.18074	1.13329	0.562216		1.24256	1.18588	0.586197		0.938839	1.49574	0.648215		0.32565	1.52511	0.674506
	1.18169	1.13441	0.5625		1.24517	1.18651	0.586493		0.939565	1.49672	0.648542		0.326344	1.52551	0.674847
	1.18382	1.13477	0.562784		1.24769	1.18665	0.586789		0.940506	1.49899	0.64887		0.326436	1.52659	0.675187
	1.18399	1.13521	0.563068		1.24845	1.18705	0.587085		0.940584	1.49983	0.649198		0.327262	1.53036	0.675528
	1.18407	1.1368	0.563352		1.24905	1.18928	0.587382		0.941338	1.50502	0.649525		0.327415	1.53042	0.675869
	1.18573	1.13685	0.563636		1.2491	1.19033	0.587678		0.943513	1.50526	0.649853		0.327511	1.53083	0.67621
	1.18624	1.13686	0.56392		1.25027	1.19194	0.587974		0.943743	1.50528	0.65018		0.327562	1.5311	0.676551
	1.1869	1.13696	0.564205		1.25184	1.19245	0.58827		0.944197	1.50547	0.650508		0.327677	1.53144	0.676892
	1.18751	1.13718	0.564489		1.25286	1.19247	0.588566		0.944271	1.50613	0.650835		0.327755	1.53181	0.677232
	1.18778	1.13749	0.564773		1.25439	1.19302	0.588863		0.944681	1.50647	0.651163		0.328057	1.53374	0.677573
	1.18802	1.1377	0.565057		1.25442	1.1931	0.589159		0.946081	1.50691	0.65149		0.328153	1.53451	0.677914
	1.18907	1.13806	0.565341		1.25447	1.19423	0.589455		0.947874	1.50708	0.651818		0.328574	1.53463	0.678255
	1.18927	1.13862	0.565625		1.25459	1.19445	0.589751		0.948569	1.50775	0.652145		0.329165	1.53533	0.678596
	1.19111	1.14064	0.565909		1.25483	1.19525	0.590047		0.948648	1.50895	0.652473		0.330391	1.53584	0.678937
	1.19177	1.14172	0.566193		1.25672	1.19537	0.590344		0.948944	1.51015	0.652801		0.330499	1.53638	0.679277
	1.19217	1.14212	0.566477		1.25704	1.19785	0.59064		0.950044	1.51107	0.653128		0.330605	1.53698	0.679618
[truncated: 1,526 more rows]
