# Supplementary material for: Endocytic trafficking determines cellular tolerance of presynaptic opioid signaling
Source: eLife. 2022 Nov 15;11:e81298. doi: 10.7554/eLife.81298 (PMC9708073; doi:10.7554/eLife.81298)
Supplement: Figure 6—source data 1. [file elife-81298-fig6-data1.xlsx]

## Sheet: Panels A C
Panel A													Panel C
			DOR Acute	DOR chronic	DOR DMSO	DOR Cmpd101									DOR S/T to A Acute	DOR S/T to A chronic
		av	0.208879	0.792265	0.758306	0.732652								av	0.246249	0.571608	av
	Ratio DADLE/baseline												Ratio DADLE/baseline
			0.297902	0.960324	1.00961	1.06671									0.151188	0.394088
			0.394612	0.793837	0.684334	0.727895									0.0972926	0.868387
			0.213832	0.885164	0.786386	0.959019									0.0956675	0.726718
			0.242427	0.764901	0.859602	0.618027									0.448011	0.628545
			0.113374	0.769522	0.781657	0.842173									0.624129	0.476232
			0.225281	0.8509	0.692254	0.620059									0.151154	0.506574
			0.0980935	0.737119	0.210487	0.865445									0.221006	0.627295
			0.238199	0.700492	0.738324	0.724168									0.181546	0.593547
			0.0685094	0.772902	1.03906	0.373634										0.340908
			0.196559	0.712074	0.856772	0.557133										0.567159
				0.767684	0.723785	0.653473										0.627074
					0.733197	0.729762										0.502772
					0.742516	0.801945
						0.75252
						0.697815
									ttest unpaired
	% inhibition		DOR Acute	DOR chronic	DOR DMSO	DOR Cmpd101			DORA/DORD		4.30645e-12		% inhibition		DTPDA	DTPDD		Unpaired ttest	0.000358801
			70.2098	3.96755	-0.960829	-6.6713			DORD/DORDMSO		0.600739				84.8812	60.5912
			60.5388	20.6163	31.5666	27.2105			DORDMSO/DOR101		0.713743				90.2707	13.1613
			78.6168	11.4836	21.3614	4.0981			DORA/DORDMSO		8.44651e-08				90.4333	27.3282
			75.7573	23.5099	14.0398	38.1973			DORA/DOR101		6.41726e-09				55.1989	37.1455
			88.6626	23.0478	21.8343	15.7827									37.5871	52.3768
			77.4719	14.91	30.7746	37.9941									84.8846	49.3426
			90.1907	26.2881	78.9513	13.4555									77.8994	37.2705
			76.1801	29.9508	26.1676	27.5832									81.8454	40.6453
			93.1491	22.7098	-3.90609	62.6366										65.9092
			80.3441	28.7926	14.3228	44.2867										43.2841
				23.2316	27.6215	34.6527										37.2926
					26.6803	27.0238										49.7228
					25.7484	19.8055
						24.748
						30.2185
Insets, DOR acute reploted from Fig 4
		frame
DOR DMSO		-58	-57	-56	-55	-54	-53	-52	-51	-50	-49	-48	-47	-46	-45	-44	-43	-42	-41	-40	-39	-38	-37	-36	-35	-34	-33	-32	-31	-30	-29	-28	-27	-26	-25	-24	-23	-22	-21	-20	-19	-18	-17	-16	-15	-14	-13	-12	-11
Baseline		-0.0329147	-0.0338678	-0.033256	-0.0297667	-0.0317751	-0.0297201	-0.033928	-0.0312029	-0.0270322	-0.0283387	-0.0334814	-0.0240971	-0.023813	-0.0225374	-0.0260172	-0.0255019	-0.027332	-0.0229089	-0.0238373	-0.0220538	-0.0254736	-0.0226296	-0.0191784	-0.021899	-0.0179973	-0.0229514	-0.0193964	-0.0211686	-0.0186286	-0.013608	-0.0208974	-0.0154166	-0.0160173	-0.014494	-0.0148523	-0.0145478	-0.0142649	-0.0148199	-0.0113024	-0.00844308	-0.0107494	-0.00788992	-0.00799007	-0.0116695	-0.0111967	-0.0084058	-0.00728111	-0.00420389
Baseline SEM		0.00307656	0.00298733	0.00292759	0.00285227	0.00281898	0.00274732	0.00269982	0.002642	0.00259853	0.00263665	0.00260101	0.00250305	0.00245753	0.00235793	0.0023878	0.00231953	0.00231192	0.00218939	0.0021988	0.00222931	0.00212611	0.00210843	0.00198721	0.00196571	0.00193847	0.00191473	0.00183496	0.0018136	0.00175616	0.00169999	0.00167586	0.00164868	0.00159174	0.00155032	0.00147179	0.00145615	0.00135845	0.00131833	0.00128724	0.00129499	0.00129062	0.00116467	0.00110598	0.00104906	0.00101714	0.000977646	0.000882856	0.000847885
DADLE		0.0676038	0.0459282	0.0307622	0.00490781	0.00972082	0.0176421	0.00835282	0.00885117	0.00574482	0.00617634	0.00907586	0.00871329	0.0065697	0.00994373	0.00423143	0.00452181	0.00519886	0.00725182	0.00180802	0.00419043	0.00460322	0.00262353	0.00212203	0.00486837	0.00624967	0.00634045	0.00086581	0.00433803	0.00151251	0.00292685	0.00259779	0.00423928	0.00198154	0.00320208	0.00239191	0.00544309	0.00236149	-6.54004e-06	0.00056507	0.000584802	-0.00205532	0.00268575	0.00405916	0.00151372	-0.000823361	0.000700992	-0.00101059	-0.00194285
DADLE SEM		0.00226508	0.00223503	0.00216182	0.00209711	0.00229191	0.00204473	0.00207282	0.00197174	0.00199959	0.00201684	0.00194981	0.00194647	0.00191469	0.00193546	0.00189285	0.00189001	0.00182335	0.00182141	0.00176197	0.00176127	0.00177391	0.0016924	0.00164239	0.00159631	0.00155863	0.001519	0.00149888	0.00143349	0.00143262	0.00138398	0.00138821	0.00138833	0.00138134	0.00133095	0.00131537	0.00127581	0.0013183	0.0012423	0.0011902	0.00116505	0.00119061	0.00117213	0.00115206	0.00110541	0.00105382	0.00104685	0.00101825	0.000943202
DOR Cmpd101		-58	-57	-56	-55	-54	-53	-52	-51	-50	-49	-48	-47	-46	-45	-44	-43	-42	-41	-40	-39	-38	-37	-36	-35	-34	-33	-32	-31	-30	-29	-28	-27	-26	-25	-24	-23	-22	-21	-20	-19	-18	-17	-16	-15	-14	-13	-12	-11
Baseline		0.00825045	0.0096543	0.00637734	0.00556277	0.0039107	0.00400152	0.00341413	0.00376073	0.00317721	0.0041137	-0.000295601	0.00248665	0.00342465	0.00137633	0.0037023	0.00217195	0.00389182	-0.000210605	0.00257481	0.000644654	-0.000253293	0.00145258	0.00303175	-0.000950799	-0.00049918	0.000342736	0.00181104	0.000502806	0.00263388	0.000151934	-0.000828299	0.00207178	0.00279289	-0.000185611	0.00262024	0.000553947	0.00172607	0.00294779	-0.00054075	0.00124795	0.00194897	-0.000593108	-0.00210035	0.00244927	0.00129555	0.00031605	0.00119811	0.00260746
Baseline SEM		0.00245249	0.00237444	0.00233724	0.00228105	0.00225349	0.00218531	0.00214999	0.00213448	0.00210456	0.00209111	0.0020234	0.0020123	0.00199535	0.00198905	0.00187592	0.00185222	0.00184308	0.00179026	0.00179402	0.00172414	0.00174519	0.00172047	0.00162656	0.00161035	0.00153557	0.00150516	0.00148344	0.00148541	0.00144284	0.00141837	0.00138066	0.00132459	0.00126376	0.00126188	0.00120651	0.00119549	0.00115863	0.0011026	0.00107797	0.00103869	0.00103267	0.00100507	0.000992959	0.000940965	0.000888973	0.000894137	0.00082126	0.000838349
DADLE		0.0758398	0.0522563	0.0380864	0.0250249	0.0201626	0.0228941	0.0204938	0.0178754	0.0148106	0.0153702	0.0150125	0.0135009	0.0106827	0.0153328	0.0150078	0.0107335	0.0133571	0.014268	0.0119558	0.0105336	0.0112807	0.00896754	0.00861063	0.00539178	0.00733161	0.00708804	0.00980734	0.0045036	0.00149578	0.00400721	0.00559266	0.00311391	0.002272	-0.000341358	0.00288158	5.1889e-05	0.00203007	-0.00101763	-0.000497592	-3.28266e-05	0.00169448	0.00159411	0.00235199	-0.00322955	-0.00310246	-0.000532385	0.000368833	-0.00229797
DADLE SEM		0.00200276	0.00189326	0.00187459	0.00185062	0.00186044	0.00181217	0.00176356	0.001741	0.00171204	0.00172154	0.00165541	0.00167797	0.00161987	0.00160144	0.00159365	0.00162146	0.0015681	0.00153211	0.0014891	0.00143973	0.00144674	0.00140507	0.00140097	0.00137138	0.00133188	0.00132793	0.00128744	0.00128921	0.0012822	0.00122618	0.00120242	0.00118844	0.00113147	0.00114683	0.00111691	0.00111567	0.00105354	0.00107419	0.00103461	0.00101968	0.00100524	0.000962563	0.000949169	0.000941047	0.000945325	0.00086764	0.000866671	0.000795347
DOR S/T to A acute		-58	-57	-56	-55	-54	-53	-52	-51	-50	-49	-48	-47	-46	-45	-44	-43	-42	-41	-40	-39	-38	-37	-36	-35	-34	-33	-32	-31	-30	-29	-28	-27	-26	-25	-24	-23	-22	-21	-20	-19	-18	-17	-16	-15	-14	-13	-12	-11
Baseline		0.0352772	0.0245102	0.0207421	0.0217584	0.0219205	0.0159254	0.0150337	0.015183	0.0171204	0.0147846	0.0172503	0.0151969	0.0151011	0.0137324	0.0146706	0.011049	0.0132929	0.0137915	0.0123645	0.0140422	0.0115419	0.00669761	0.010218	0.0085833	0.00787895	0.00639494	0.00926061	0.0069951	0.00601824	0.00586735	0.00850788	0.00664007	0.00473537	0.00767957	0.0043355	0.000805725	-0.00216318	-0.00600569	0.00191556	0.000392992	0.00366553	0.00162155	0.000810383	-0.00118777	0.00157146	-0.00122153	0.00108927	-0.00188471
Baseline SEM		0.00312935	0.00305321	0.00299767	0.00296655	0.00299091	0.00291127	0.00291799	0.00282662	0.00282554	0.0027984	0.00271302	0.00265061	0.00267775	0.00266827	0.00256305	0.00256951	0.00249552	0.00244017	0.00240143	0.00236579	0.00228547	0.00227729	0.00224388	0.00221411	0.002188	0.00214392	0.00213768	0.00209167	0.00207529	0.00200761	0.00199267	0.00190794	0.00183092	0.00181692	0.00175128	0.00173909	0.00176446	0.00165083	0.00159696	0.00162061	0.00155974	0.00144873	0.0013722	0.00136943	0.00127725	0.00128377	0.00130095	0.00117606
DADLE		0.0964868	0.0731219	0.0576911	0.0471785	0.0371635	0.0394604	0.0355916	0.0284368	0.0349177	0.0288763	0.0279929	0.0304145	0.0251667	0.0220153	0.025168	0.0221536	0.01758	0.0172492	0.0247539	0.0143395	0.0222577	0.0208321	0.0186405	0.0156941	0.0124658	0.0160383	0.00571185	0.01266	0.0147094	0.0175137	0.01513	0.0108715	0.0097129	0.0129418	0.0116695	0.0114104	0.00641749	0.00664781	0.00934425	0.0113966	0.0113817	0.0077231	0.00457469	0.00262578	-0.00322471	0.00523951	0.00312849	0.00392523
DADLE SEM		0.00230663	0.00211744	0.00208737	0.00199988	0.00201531	0.00200902	0.00194613	0.00195011	0.00187215	0.00185706	0.00181634	0.00181607	0.00183418	0.00179326	0.00177161	0.00175619	0.00175696	0.00169629	0.00171557	0.0016922	0.00170336	0.0017216	0.00171503	0.00170817	0.0016459	0.00160289	0.00166155	0.00158684	0.00150677	0.00146356	0.00145184	0.00143364	0.00142017	0.00138759	0.00134481	0.00134508	0.00126949	0.00127101	0.00127352	0.00120187	0.00120358	0.00115254	0.0011218	0.00112368	0.00112233	0.00106764	0.00103102	0.00100689
DOR S/T to A Chronic		-58	-57	-56	-55	-54	-53	-52	-51	-50	-49	-48	-47	-46	-45	-44	-43	-42	-41	-40	-39	-38	-37	-36	-35	-34	-33	-32	-31	-30	-29	-28	-27	-26	-25	-24	-23	-22	-21	-20	-19	-18	-17	-16	-15	-14	-13	-12	-11
Baseline		0.0133976	0.0118276	0.00470823	0.00225123	0.00585065	-0.0112015	-0.015275	-0.0125105	-0.0174381	-0.016768	-0.0117923	-0.0144061	-0.0163023	-0.0190912	-0.0183637	-0.0131315	-0.011567	-0.0107253	-0.0123428	-0.0139282	-0.0170479	-0.0099449	-0.012447	-0.0108402	-0.0109843	-0.00959374	-0.0125349	-0.0076967	-0.0112148	-0.0088817	-0.00816344	-0.0116353	-0.0135362	-0.00899106	-0.00491513	-0.0144297	-0.00931178	-0.00936173	-0.00592298	-0.00375282	-0.00716802	-0.00723897	-0.00509769	-0.00276516	-0.00851688	-0.00649387	-0.00220832	-0.00429245
Baseline SEM		0.00324318	0.0030942	0.00306345	0.00295522	0.00294294	0.00275356	0.00275365	0.00266658	0.00252793	0.00258243	0.00244123	0.00245213	0.00239752	0.00236966	0.00230524	0.00229026	0.00217808	0.00209527	0.00202708	0.00202897	0.00206232	0.00192745	0.0019434	0.00185718	0.00182253	0.00175517	0.00174418	0.00168364	0.00159435	0.00158779	0.00155161	0.00151686	0.00150884	0.00143042	0.00137318	0.00134158	0.00131213	0.00127657	0.00120555	0.00123221	0.00117897	0.00107125	0.00108584	0.00101116	0.000963779	0.000974723	0.000916336	0.00085716
DADLE		0.0645192	0.048321	0.0343763	0.0255174	0.0180085	0.0132208	0.0112551	0.0169113	0.0167966	0.00843782	0.0084309	0.00269793	0.0100452	0.00701399	0.0102414	0.00816259	0.00647347	0.00653246	0.00434323	0.00302384	0.00429962	0.00402477	0.000850425	0.00374085	0.00469718	-0.000789395	0.0041847	0.00427392	0.000376198	-0.00134672	-0.000187023	0.00320484	0.000373613	0.00393239	0.00663632	-0.00329446	-0.00566858	-0.0128336	-0.00399788	-0.00285439	-0.00197279	-0.00121398	-0.0013681	0.0024631	-0.00440994	-0.0026425	-0.00217032	-0.0031856
DADLE SEM		0.00206742	0.00199115	0.00194151	0.00191889	0.00191673	0.00189767	0.00185766	0.0018354	0.00177931	0.00181238	0.00176667	0.00173521	0.00162149	0.00160459	0.00158224	0.00158214	0.00153138	0.00151615	0.00146876	0.00144891	0.00138103	0.00140567	0.00138395	0.00143032	0.00132299	0.00133321	0.00129151	0.00129315	0.00123726	0.00127382	0.00122512	0.00118525	0.00120163	0.00116002	0.00112526	0.00113543	0.00121455	0.0012869	0.00110051	0.00104434	0.00105626	0.000991189	0.000974133	0.000953738	0.000961041	0.000903009	0.000843492	0.000834391
[truncated: 72 more columns]

## Sheet: Panels B D
Panel D																		Panel B
																											DOR + DMSO
DTPD	baseline	fr6-fr11	fr12-fr16	fr17-fr21	fr22-fr26	fr27-fr31	fr32-fr36		DTPDC	baseline	fr6-fr11	fr12-fr16	fr17-fr21	fr22-fr26	fr27-fr31	fr32-fr36		DOR + Cmpd101	baseline	fr6-fr11	fr12-fr16	fr17-fr21	fr22-fr26	fr27-fr31	fr32-fr36			baseline	fr6-fr11	fr12-fr16	fr17-fr21	fr22-fr26	fr27-fr31	fr32-fr36
3248	1	1.05124	1.08936	1.14306	1.15739	1.13155	1.18243		3247	1	1.0099	1.00106	1.02451	1.02843	1.06732	1.00577		3122	1	1.08751	1.22309	1.38751	1.44759	1.51909	1.52637		3119	1	0.958023	1.03809	1.11925	1.08642	1.12184	1.12625
3249	1	1.05168	1.05441	1.04968	1.09393	1.06961	1.03454		3251	1	1.02378	1.01833	1.00851	1.01578	1.0351	1.02152		3252	1	1.03885	1.08651	1.28713	1.26199	1.47106	1.35273		3120	1	1.18413	2.00118	2.61409	3.1886	3.37481	3.54725
3250	1	1.15048	1.25347	1.42982	1.61755	1.83399	2.02655		3294	1	0.864797	0.774894	0.83875	0.971593	0.929007	0.993203		3254	1	1.10712	1.13716	1.07768	1.17476	1.17988	1.16334		3121	1	1.0721	1.04217	1.06634	1.07743	1.14974	1.14375
3295	1	1.02926	1.0834	1.0928	1.21961	1.24365	1.2568		3297	1	1.0656	0.929866	0.991048	0.998309	1.03876	0.976401		3256	1	1.05924	0.994026	1.14802	1.26027	1.41101	1.38608		3253	1	1.0347	1.02694	1.08614	1.1444	1.14716	1.13392
3296	1	0.945741	1.0041	1.10605	1.08006	1.06478	1.13219		3826	1	0.984174	0.94788	1.04873	1.00338	0.939113	0.936182		3299	1	1.12351	1.33496	1.47803	1.80404	1.75163	1.82506		3255	1	1.0561	1.12373	1.0826	1.2701	1.18593	1.28968
3298	1	1.02254	1.12219	1.18925	1.18485	1.23965	1.2019		3827	1	1.10239	1.24203	1.02608	1.1751	1.02635	1.14101		3301	1	1.05875	1.11109	1.18488	1.32417	1.4051	1.30554		3300	1	1.13683	1.09103	1.27952	1.41114	1.61139	1.62469
3828	1	1.11738	1.09349	1.15377	1.26159	1.30816	1.29876											3303	1	1.04395	1.04689	1.13529	1.1903	1.25554	1.25552		3302	1	1.0608	1.38036	1.42905	1.5423	1.88593	2.32901
									bins	baseline	fr6-fr11	fr12-fr16	fr17-fr21	fr22-fr26	fr27-fr31	fr32-fr36
bins	baseline	fr6-fr11	fr12-fr16	fr17-fr21	fr22-fr26	fr27-fr31	fr32-fr36		Average	1	1.00844	0.985678	0.989605	1.0321	1.00594	1.01235		bins	baseline	fr6-fr11	fr12-fr16	fr17-fr21	fr22-fr26	fr27-fr31	fr32-fr36		bins	baseline	fr6-fr11	fr12-fr16	fr17-fr21	fr22-fr26	fr27-fr31	fr32-fr36
Average	1	1.05262	1.10006	1.16635	1.23071	1.2702	1.30474		SEM	2.34786e-16	0.0305294	0.0567632	0.0284612	0.0270584	0.0214059	0.0258959		Average	1	1.07413	1.13339	1.24265	1.35187	1.42762	1.40209		Average	1	1.07181	1.24336	1.38243	1.53148	1.63954	1.74208
SEM	1.74464e-16	0.0233198	0.0270117	0.0436349	0.0638245	0.0928675	0.115322											SEM	1.50464e-16	0.0113566	0.0399718	0.0513893	0.0767083	0.0649972	0.0762441		SEM	1.19743e-16	0.0253695	0.124542	0.195699	0.262757	0.28674	0.317152
									ttest		0.306087	0.107845	0.0118465	0.0299925	0.036671	0.0575378			Ttest unpaired	ns	ns	ns	ns	ns	ns
											ns	ns	*	*	*	ns		101/DSMO	1	0.939686	0.451425	0.534468	0.554846	0.517186	0.353599

## Sheet: Panel E
		Av		1.29641	1.28163			0.452953	1.37419
		Median		1	1			0.319219	1.06428
		DOR S/T to A					DOR S/T to A + DADLE						SEP	mCh
			n	7200			n	8904				KS test	0	2.7752e-07
			Freq	SEP	mCh		Freq	SEP	mCh
			0.000138889	-0.272005	0.053816		0.000112309	-0.173601	0.0660815
			0.000277778	-0.186447	0.0847305		0.000224618	-0.163726	0.0710623
			0.000416667	-0.177339	0.0893611		0.000336927	-0.153668	0.0998026
			0.000555556	-0.16254	0.0926585		0.000449236	-0.147114	0.10646
			0.000694444	-0.139651	0.095464		0.000561545	-0.141256	0.11276
			0.000833333	-0.138504	0.1004		0.000673854	-0.140269	0.114881
			0.000972222	-0.12694	0.109342		0.000786164	-0.139883	0.12665
			0.00111111	-0.120339	0.115665		0.000898473	-0.139464	0.12904
			0.00125	-0.120084	0.117791		0.00101078	-0.137185	0.130701
			0.00138889	-0.104574	0.118953		0.00112309	-0.136445	0.1357
			0.00152778	-0.101647	0.123437		0.0012354	-0.130427	0.136191
			0.00166667	-0.101634	0.130104		0.00134771	-0.129216	0.141524
			0.00180556	-0.0969976	0.130874		0.00146002	-0.1273	0.143043
			0.00194444	-0.0874368	0.140192		0.00157233	-0.124785	0.147349
			0.00208333	-0.0841542	0.141272		0.00168464	-0.120734	0.147748
			0.00222222	-0.0818416	0.146453		0.00179695	-0.119862	0.148772
			0.00236111	-0.074695	0.153413		0.00190925	-0.110184	0.149968
			0.0025	-0.069758	0.154658		0.00202156	-0.104008	0.157629
			0.00263889	-0.0676416	0.156218		0.00213387	-0.102384	0.158131
			0.00277778	-0.0660902	0.158753		0.00224618	-0.0973897	0.161025
			0.00291667	-0.0625336	0.159614		0.00235849	-0.0947466	0.162737
			0.00305556	-0.0606016	0.162942		0.0024708	-0.0855135	0.163109
			0.00319444	-0.0546921	0.163334		0.00258311	-0.0833476	0.169949
			0.00333333	-0.054386	0.164287		0.00269542	-0.0812862	0.169982
			0.00347222	-0.0531317	0.164318		0.00280773	-0.080735	0.17014
			0.00361111	-0.0510894	0.164343		0.00292004	-0.0795219	0.17083
			0.00375	-0.0506633	0.165202		0.00303235	-0.0793777	0.171066
			0.00388889	-0.0502949	0.165823		0.00314465	-0.0792866	0.173661
			0.00402778	-0.0493603	0.167077		0.00325696	-0.0788572	0.173747
			0.00416667	-0.0487565	0.167948		0.00336927	-0.0778086	0.174604
			0.00430556	-0.0472425	0.16833		0.00348158	-0.0770384	0.174953
			0.00444444	-0.0467127	0.17139		0.00359389	-0.0768077	0.175668
			0.00458333	-0.0446572	0.17318		0.0037062	-0.0752559	0.177752
			0.00472222	-0.0424169	0.174271		0.00381851	-0.0720908	0.177754
			0.00486111	-0.040876	0.176196		0.00393082	-0.0720375	0.178811
			0.005	-0.0398382	0.179804		0.00404313	-0.07088	0.181192
			0.00513889	-0.0397472	0.180429		0.00415544	-0.0697649	0.182657
			0.00527778	-0.0395868	0.181506		0.00426774	-0.0689259	0.182893
			0.00541667	-0.0393206	0.181743		0.00438005	-0.0678063	0.183529
			0.00555556	-0.0393062	0.18262		0.00449236	-0.066179	0.186427
			0.00569444	-0.0352195	0.184076		0.00460467	-0.0659505	0.186683
			0.00583333	-0.0345725	0.188901		0.00471698	-0.0656761	0.186979
			0.00597222	-0.0329568	0.189137		0.00482929	-0.0648266	0.187273
			0.00611111	-0.0314137	0.189429		0.0049416	-0.0639234	0.188814
			0.00625	-0.0314071	0.19028		0.00505391	-0.063068	0.188937
			0.00638889	-0.0310048	0.192634		0.00516622	-0.0623119	0.189807
			0.00652778	-0.0281862	0.193497		0.00527853	-0.0615425	0.190498
			0.00666667	-0.0272388	0.19421		0.00539084	-0.0597055	0.190592
			0.00680556	-0.0268181	0.196189		0.00550314	-0.0589342	0.192728
			0.00694444	-0.0247313	0.198148		0.00561545	-0.0578236	0.194075
			0.00708333	-0.0240937	0.198437		0.00572776	-0.0574513	0.194144
			0.00722222	-0.0170216	0.199611		0.00584007	-0.0569459	0.196897
			0.00736111	-0.0153295	0.201082		0.00595238	-0.0569358	0.197449
			0.0075	-0.0153162	0.201776		0.00606469	-0.0566712	0.197786
			0.00763889	-0.0124213	0.203599		0.006177	-0.0565611	0.198271
			0.00777778	-0.0120462	0.20501		0.00628931	-0.0554367	0.199702
			0.00791667	-0.0114848	0.206467		0.00640162	-0.0551935	0.200134
			0.00805556	-0.0095079	0.206814		0.00651393	-0.053697	0.201111
			0.00819444	-0.00731518	0.207294		0.00662624	-0.0527152	0.201169
			0.00833333	-0.00698165	0.207306		0.00673854	-0.0525687	0.201372
			0.00847222	-0.00649311	0.208762		0.00685085	-0.0499974	0.2022
			0.00861111	-0.00645653	0.209172		0.00696316	-0.049697	0.203734
			0.00875	-0.0062748	0.209872		0.00707547	-0.0487221	0.203916
			0.00888889	-0.00253406	0.210479		0.00718778	-0.0462459	0.204515
			0.00902778	-0.000889189	0.21075		0.00730009	-0.0462396	0.206768
			0.00916667	-0.000346214	0.210899		0.0074124	-0.0452333	0.207181
			0.00930556	0.000458844	0.211198		0.00752471	-0.0446189	0.207222
			0.00944444	0.00051082	0.211239		0.00763702	-0.0444086	0.207394
			0.00958333	0.00118471	0.211863		0.00774933	-0.0442557	0.208287
			0.00972222	0.0013586	0.212083		0.00786164	-0.0440667	0.210349
			0.00986111	0.00139841	0.212122		0.00797394	-0.0421879	0.210678
			0.01	0.00151269	0.212596		0.00808625	-0.0413432	0.210765
			0.0101389	0.00308715	0.213259		0.00819856	-0.0412735	0.212082
			0.0102778	0.00381905	0.213404		0.00831087	-0.0400345	0.213992
			0.0104167	0.00558379	0.215298		0.00842318	-0.0396105	0.214297
			0.0105556	0.00566259	0.217212		0.00853549	-0.0384588	0.214546
			0.0106944	0.00718642	0.218219		0.0086478	-0.0377751	0.21483
			0.0108333	0.00832294	0.218289		0.00876011	-0.0377043	0.215141
			0.0109722	0.00861579	0.219342		0.00887242	-0.0369878	0.216359
			0.0111111	0.0100386	0.220024		0.00898473	-0.0366618	0.216605
			0.01125	0.0109006	0.220773		0.00909704	-0.0360288	0.217618
			0.0113889	0.0123745	0.221011		0.00920934	-0.0353767	0.217681
			0.0115278	0.0124858	0.221259		0.00932165	-0.0352852	0.217727
			0.0116667	0.014486	0.221278		0.00943396	-0.0351351	0.219491
			0.0118056	0.0158035	0.221901		0.00954627	-0.0348714	0.220373
			0.0119444	0.0195881	0.222297		0.00965858	-0.034757	0.221875
			0.0120833	0.0210529	0.222626		0.00977089	-0.0330451	0.22205
			0.0122222	0.0215619	0.224386		0.0098832	-0.0329594	0.223102
			0.0123611	0.0232121	0.224784		0.00999551	-0.0328126	0.223232
			0.0125	0.0232966	0.224827		0.0101078	-0.0327989	0.224872
			0.0126389	0.0237154	0.22547		0.0102201	-0.0325439	0.226942
			0.0127778	0.0253366	0.225638		0.0103324	-0.0321765	0.228189
			0.0129167	0.0255976	0.227865		0.0104447	-0.0311204	0.228587
			0.0130556	0.028003	0.229344		0.0105571	-0.0305488	0.228589
			0.0131944	0.0297903	0.229778		0.0106694	-0.0299777	0.228735
			0.0133333	0.030895	0.230191		0.0107817	-0.0294184	0.228745
			0.0134722	0.0310057	0.231233		0.010894	-0.0291845	0.228979
			0.0136111	0.0310272	0.233092		0.0110063	-0.0288445	0.23056
			0.01375	0.0312901	0.233719		0.0111186	-0.0279424	0.231415
			0.0138889	0.0315319	0.233944		0.0112309	-0.0279421	0.231509
			0.0140278	0.0320764	0.234197		0.0113432	-0.0278602	0.232065
			0.0141667	0.0322918	0.234389		0.0114555	-0.0274274	0.232728
			0.0143056	0.0327633	0.234893		0.0115678	-0.0273919	0.23412
			0.0144444	0.0338335	0.235187		0.0116801	-0.0269657	0.234587
			0.0145833	0.0347308	0.236143		0.0117925	-0.026419	0.23583
			0.0147222	0.0348962	0.236583		0.0119048	-0.0263885	0.236196
			0.0148611	0.0353905	0.23694		0.0120171	-0.0263468	0.237083
			0.015	0.0358513	0.238385		0.0121294	-0.0260566	0.237964
			0.0151389	0.0359626	0.238634		0.0122417	-0.0258518	0.238168
			0.0152778	0.0363364	0.23896		0.012354	-0.025374	0.238444
			0.0154167	0.0409646	0.239752		0.0124663	-0.0247137	0.238446
			0.0155556	0.0420639	0.240657		0.0125786	-0.0244344	0.238846
			0.0156944	0.042152	0.241337		0.0126909	-0.0241622	0.238859
			0.0158333	0.0427022	0.241361		0.0128032	-0.0232111	0.23918
			0.0159722	0.0429453	0.241476		0.0129155	-0.0226893	0.239659
			0.0161111	0.0431221	0.241957		0.0130279	-0.02238	0.239683
			0.01625	0.0436838	0.24204		0.0131402	-0.0222982	0.239767
			0.0163889	0.0439105	0.242236		0.0132525	-0.0211956	0.240049
			0.0165278	0.0448758	0.242996		0.0133648	-0.0207882	0.241161
			0.0166667	0.0461411	0.24314		0.0134771	-0.0204362	0.241628
			0.0168056	0.0466814	0.243524		0.0135894	-0.0203889	0.242024
			0.0169444	0.0469652	0.244009		0.0137017	-0.0188379	0.242487
			0.0170833	0.0473044	0.245246		0.013814	-0.0187706	0.242759
			0.0172222	0.0473487	0.245528		0.0139263	-0.0186643	0.24297
			0.0173611	0.0480309	0.246105		0.0140386	-0.0185291	0.244478
			0.0175	0.0494645	0.246432		0.0141509	-0.0179867	0.244899
			0.0176389	0.0504605	0.246676		0.0142633	-0.0177854	0.245362
			0.0177778	0.0508268	0.247455		0.0143756	-0.0177138	0.245634
			0.0179167	0.0512066	0.248149		0.0144879	-0.0176978	0.246209
			0.0180556	0.051474	0.250126		0.0146002	-0.0167672	0.246735
			0.0181944	0.0515616	0.250838		0.0147125	-0.0164852	0.246956
			0.0183333	0.0529973	0.251026		0.0148248	-0.0163331	0.247725
			0.0184722	0.0531541	0.251428		0.0149371	-0.016313	0.247997
			0.0186111	0.0542508	0.251646		0.0150494	-0.0161099	0.249925
			0.01875	0.0548657	0.251892		0.0151617	-0.0158337	0.249933
			0.0188889	0.0557849	0.252596		0.015274	-0.0158094	0.250313
			0.0190278	0.0577371	0.252971		0.0153863	-0.0149304	0.250483
			0.0191667	0.0589274	0.253549		0.0154987	-0.0147108	0.250529
			0.0193056	0.0591369	0.253687		0.015611	-0.014421	0.250656
			0.0194444	0.0597724	0.253761		0.0157233	-0.0143672	0.251068
			0.0195833	0.0608148	0.254354		0.0158356	-0.0139951	0.251236
			0.0197222	0.0616339	0.254919		0.0159479	-0.0139744	0.25126
			0.0198611	0.0618453	0.254967		0.0160602	-0.0139259	0.252307
			0.02	0.0619999	0.256527		0.0161725	-0.0135982	0.252367
			0.0201389	0.0626611	0.257531		0.0162848	-0.0134167	0.252673
			0.0202778	0.063105	0.259942		0.0163971	-0.0133311	0.253104
			0.0204167	0.0631375	0.260999		0.0165094	-0.0130215	0.253218
			0.0205556	0.0634833	0.262165		0.0166217	-0.012709	0.253439
			0.0206944	0.0647397	0.26242		0.0167341	-0.0123844	0.253844
			0.0208333	0.0651961	0.263205		0.0168464	-0.0120334	0.255137
			0.0209722	0.0656044	0.263589		0.0169587	-0.0119235	0.255163
			0.0211111	0.066034	0.263679		0.017071	-0.0118342	0.255593
			0.02125	0.0660938	0.263788		0.0171833	-0.0113631	0.256003
			0.0213889	0.0662204	0.264159		0.0172956	-0.0113597	0.256927
			0.0215278	0.0666657	0.264452		0.0174079	-0.0112203	0.257479
			0.0216667	0.0669959	0.265928		0.0175202	-0.0110301	0.257676
			0.0218056	0.0681322	0.266734		0.0176325	-0.010969	0.257932
			0.0219444	0.0686814	0.267733		0.0177448	-0.0108242	0.258005
			0.0220833	0.0694249	0.267824		0.0178571	-0.0100785	0.25837
			0.0222222	0.0695271	0.268215		0.0179695	-0.00993471	0.258653
			0.0223611	0.0695373	0.268247		0.0180818	-0.00975611	0.258996
			0.0225	0.0712456	0.26908		0.0181941	-0.00959531	0.259297
			0.0226389	0.0713357	0.269117		0.0183064	-0.00936407	0.25978
			0.0227778	0.0713624	0.269355		0.0184187	-0.00923332	0.260429
			0.0229167	0.0721934	0.269489		0.018531	-0.00922628	0.261271
			0.0230556	0.072655	0.271718		0.0186433	-0.00912565	0.261563
			0.0231944	0.0727794	0.271757		0.0187556	-0.00891591	0.261684
			0.0233333	0.0730686	0.272846		0.0188679	-0.00845787	0.261951
			0.0234722	0.0737758	0.274045		0.0189802	-0.00814291	0.262833
			0.0236111	0.074103	0.274218		0.0190925	-0.00769602	0.262837
			0.02375	0.0751618	0.274712		0.0192049	-0.00754443	0.262896
			0.0238889	0.0755737	0.275049		0.0193172	-0.00703888	0.263342
			0.0240278	0.0756025	0.275063		0.0194295	-0.00621139	0.263457
			0.0241667	0.0776357	0.276171		0.0195418	-0.00579709	0.263686
			0.0243056	0.0779475	0.276951		0.0196541	-0.00552908	0.263788
			0.0244444	0.0780475	0.277107		0.0197664	-0.00548576	0.263916
			0.0245833	0.0791729	0.277553		0.0198787	-0.00474734	0.264085
			0.0247222	0.0802955	0.277793		0.019991	-0.00464321	0.264472
			0.0248611	0.0805422	0.278063		0.0201033	-0.00374407	0.26466
			0.025	0.0818573	0.278205		0.0202156	-0.00301405	0.264798
			0.0251389	0.082036	0.278433		0.0203279	-0.00258509	0.265009
			0.0252778	0.082333	0.278689		0.0204403	-0.00218487	0.266765
			0.0254167	0.0828303	0.278709		0.0205526	-0.00184185	0.267134
			0.0255556	0.0838257	0.278717		0.0206649	-0.00182562	0.268792
			0.0256944	0.0840118	0.278879		0.0207772	-0.0016684	0.268819
			0.0258333	0.0843783	0.278944		0.0208895	-0.00152037	0.268862
			0.0259722	0.0845117	0.279082		0.0210018	-0.00152037	0.270792
			0.0261111	0.084658	0.279702		0.0211141	-0.00127285	0.270827
			0.02625	0.0862907	0.280175		0.0212264	-0.00102363	0.270926
			0.0263889	0.0866864	0.280898		0.0213387	-0.000759685	0.271574
			0.0265278	0.0870153	0.281033		0.021451	-0.000667196	0.272377
			0.0266667	0.0877618	0.281096		0.0215633	-0.000485919	0.27263
			0.0268056	0.0884067	0.281732		0.0216757	-0.000419411	0.272652
			0.0269444	0.0891172	0.281757		0.021788	-0.000210073	0.272673
			0.0270833	0.0895542	0.28199		0.0219003	-0.000124234	0.273762
			0.0272222	0.0899065	0.282198		0.0220126	-6.16494e-05	0.274114
			0.0273611	0.0904841	0.282276		0.0221249	-1.79537e-05	0.274751
			0.0275	0.0905289	0.283244		0.0222372	6.17039e-06	0.27477
			0.0276389	0.091796	0.283401		0.0223495	0.0003366	0.275228
			0.0277778	0.0923846	0.283772		0.0224618	0.000371181	0.275261
			0.0279167	0.0934545	0.284118		0.0225741	0.000623795	0.275612
			0.0280556	0.0948721	0.284574		0.0226864	0.00100478	0.275714
			0.0281944	0.0956003	0.284956		0.0227987	0.00121341	0.275826
			0.0283333	0.0960275	0.285191		0.0229111	0.00147041	0.275879
			0.0284722	0.0965952	0.285406		0.0230234	0.00172032	0.276924
			0.0286111	0.0966764	0.285449		0.0231357	0.00174491	0.277766
			0.02875	0.096925	0.285659		0.023248	0.00191954	0.277951
			0.0288889	0.0969635	0.286009		0.0233603	0.00197744	0.278014
			0.0290278	0.0971708	0.286232		0.0234726	0.00220845	0.278439
			0.0291667	0.0979152	0.28702		0.0235849	0.00253291	0.279224
			0.0293056	0.0983028	0.28791		0.0236972	0.00257985	0.28028
			0.0294444	0.0983064	0.288489		0.0238095	0.00265716	0.280421
			0.0295833	0.0984825	0.288748		0.0239218	0.00277948	0.281288
			0.0297222	0.0992142	0.289607		0.0240341	0.0029078	0.28132
			0.0298611	0.100111	0.289804		0.0241465	0.00294328	0.282879
			0.03	0.100258	0.290072		0.0242588	0.00295534	0.283006
			0.0301389	0.100682	0.290472		0.0243711	0.00308502	0.283127
			0.0302778	0.100683	0.291267		0.0244834	0.00315248	0.28316
			0.0304167	0.101413	0.291348		0.0245957	0.00329044	0.283384
			0.0305556	0.101716	0.291556		0.024708	0.00344989	0.283834
			0.0306944	0.101836	0.29182		0.0248203	0.00363122	0.284115
			0.0308333	0.102219	0.292301		0.0249326	0.00373698	0.284137
			0.0309722	0.102833	0.292376		0.0250449	0.00398784	0.284314
			0.0311111	0.102969	0.29255		0.0251572	0.00401749	0.285047
			0.03125	0.103204	0.292645		0.0252695	0.0042704	0.285397
			0.0313889	0.103373	0.292689		0.0253819	0.00434244	0.285538
			0.0315278	0.103898	0.292796		0.0254942	0.00445208	0.285546
			0.0316667	0.104357	0.293347		0.0256065	0.00470796	0.285834
			0.0318056	0.104369	0.293583		0.0257188	0.00478977	0.285954
			0.0319444	0.104749	0.293693		0.0258311	0.00495681	0.286352
			0.0320833	0.105094	0.294195		0.0259434	0.00507371	0.287265
			0.0322222	0.105994	0.29427		0.0260557	0.00533448	0.287321
			0.0323611	0.106535	0.294517		0.026168	0.00546488	0.287892
			0.0325	0.106714	0.294913		0.0262803	0.00548533	0.288078
			0.0326389	0.107286	0.294924		0.0263926	0.0056707	0.288353
			0.0327778	0.107397	0.295084		0.0265049	0.00602999	0.288447
			0.0329167	0.107881	0.295897		0.0266173	0.00605695	0.28912
			0.0330556	0.108588	0.296165		0.0267296	0.00651519	0.289756
			0.0331944	0.108945	0.296321		0.0268419	0.0067319	0.290353
			0.0333333	0.109402	0.296482		0.0269542	0.00678905	0.290451
			0.0334722	0.109755	0.296888		0.0270665	0.00698255	0.290581
			0.0336111	0.109914	0.296929		0.0271788	0.00755577	0.290816
			0.03375	0.110466	0.297654		0.0272911	0.00758147	0.291372
			0.0338889	0.111469	0.297677		0.0274034	0.00762668	0.291795
			0.0340278	0.111527	0.29776		0.0275157	0.00797528	0.292825
			0.0341667	0.113411	0.298524		0.027628	0.00802605	0.292983
			0.0343056	0.113647	0.29872		0.0277403	0.00802969	0.294666
			0.0344444	0.114089	0.298833		0.0278527	0.00823435	0.294754
			0.0345833	0.114166	0.300076		0.027965	0.00843172	0.29482
			0.0347222	0.114514	0.30034		0.0280773	0.00844706	0.295144
			0.0348611	0.114596	0.301746		0.0281896	0.0087713	0.295321
			0.035	0.114736	0.301841		0.0283019	0.00917246	0.296324
			0.0351389	0.114784	0.30215		0.0284142	0.00960473	0.296385
			0.0352778	0.115042	0.302154		0.0285265	0.00963156	0.296456
			0.0354167	0.115097	0.302403		0.0286388	0.00975103	0.296505
			0.0355556	0.115458	0.302524		0.0287511	0.0100416	0.296835
			0.0356944	0.11635	0.30375		0.0288634	0.0100416	0.29693
			0.0358333	0.116633	0.304726		0.0289757	0.0103538	0.296999
			0.0359722	0.118016	0.305021		0.0290881	0.0103938	0.297414
			0.0361111	0.118833	0.305456		0.0292004	0.0111188	0.298094
			0.03625	0.119615	0.305718		0.0293127	0.0111206	0.298155
			0.0363889	0.120334	0.306462		0.029425	0.0114147	0.298247
			0.0365278	0.121472	0.307022		0.0295373	0.011447	0.298821
			0.0366667	0.122028	0.307136		0.0296496	0.0117091	0.299454
			0.0368056	0.124274	0.307161		0.0297619	0.0121032	0.299672
			0.0369444	0.124671	0.307743		0.0298742	0.0124294	0.299773
			0.0370833	0.124927	0.308881		0.0299865	0.0125441	0.299801
			0.0372222	0.12498	0.309054		0.0300988	0.0125847	0.300308
			0.0373611	0.125037	0.309209		0.0302111	0.0128481	0.300985
			0.0375	0.125238	0.309344		0.0303235	0.0129063	0.301302
			0.0376389	0.125792	0.309413		0.0304358	0.0130308	0.302149
			0.0377778	0.126072	0.309546		0.0305481	0.0131119	0.302196
			0.0379167	0.126149	0.310502		0.0306604	0.0131826	0.303297
			0.0380556	0.126574	0.310509		0.0307727	0.0133391	0.303812
			0.0381944	0.126857	0.310647		0.030885	0.0133901	0.304503
			0.0383333	0.128482	0.311005		0.0309973	0.0134339	0.304865
			0.0384722	0.128734	0.311261		0.0311096	0.0138633	0.304943
			0.0386111	0.128982	0.311722		0.0312219	0.0140121	0.305078
			0.03875	0.129056	0.311746		0.0313342	0.0140908	0.305156
			0.0388889	0.129152	0.311766		0.0314465	0.0141551	0.305386
			0.0390278	0.129289	0.311863		0.0315588	0.0143269	0.305542
			0.0391667	0.129505	0.313239		0.0316712	0.0147781	0.306222
			0.0393056	0.131685	0.313507		0.0317835	0.014989	0.30635
			0.0394444	0.131973	0.313909		0.0318958	0.015294	0.306774
			0.0395833	0.132018	0.313992		0.0320081	0.0158649	0.306798
			0.0397222	0.132266	0.314127		0.0321204	0.0159579	0.307141
			0.0398611	0.132791	0.314491		0.0322327	0.0167897	0.307205
			0.04	0.132934	0.314562		0.032345	0.0168411	0.307491
			0.0401389	0.133522	0.314604		0.0324573	0.0169137	0.307728
			0.0402778	0.134415	0.314782		0.0325696	0.0170558	0.308007
			0.0404167	0.134429	0.314797		0.0326819	0.0170697	0.308325
			0.0405556	0.134488	0.314896		0.0327942	0.0171876	0.308372
			0.0406944	0.134618	0.315759		0.0329066	0.0173048	0.30865
			0.0408333	0.136293	0.31592		0.0330189	0.0179546	0.309422
			0.0409722	0.137143	0.3161		0.0331312	0.0181004	0.309516
			0.0411111	0.137238	0.316421		0.0332435	0.0183792	0.309694
			0.04125	0.137681	0.316843		0.0333558	0.018691	0.309828
			0.0413889	0.138139	0.316977		0.0334681	0.0187349	0.310476
			0.0415278	0.138174	0.317065		0.0335804	0.019191	0.310659
			0.0416667	0.13842	0.317176		0.0336927	0.0192401	0.31076
			0.0418056	0.138838	0.31752		0.033805	0.0192785	0.310925
			0.0419444	0.138956	0.317801		0.0339173	0.0194339	0.312031
			0.0420833	0.13927	0.3179		0.0340296	0.0200678	0.312061
			0.0422222	0.139349	0.318327		0.034142	0.0204196	0.312069
			0.0423611	0.140336	0.31861		0.0342543	0.0204286	0.312071
			0.0425	0.140779	0.318695		0.0343666	0.0204747	0.312829
			0.0426389	0.141892	0.31887		0.0344789	0.0206051	0.313208
			0.0427778	0.142206	0.319475		0.0345912	0.0208766	0.313229
			0.0429167	0.142267	0.319703		0.0347035	0.0210723	0.313683
			0.0430556	0.142402	0.31988		0.0348158	0.0212724	0.313987
			0.0431944	0.142435	0.319918		0.0349281	0.0215743	0.314131
			0.0433333	0.142794	0.320485		0.0350404	0.0216078	0.314228
			0.0434722	0.14285	0.320519		0.0351527	0.0217164	0.314447
			0.0436111	0.143148	0.320571		0.035265	0.0218805	0.315
			0.04375	0.143324	0.321522		0.0353774	0.0219256	0.315018
			0.0438889	0.144018	0.321633		0.0354897	0.0220933	0.315553
			0.0440278	0.14405	0.321759		0.035602	0.0221323	0.316405
			0.0441667	0.144375	0.322092		0.0357143	0.0222214	0.317129
			0.0443056	0.144425	0.322449		0.0358266	0.0225108	0.317404
			0.0444444	0.144747	0.322719		0.0359389	0.02268	0.317594
			0.0445833	0.14476	0.322767		0.0360512	0.0233135	0.317878
			0.0447222	0.145192	0.322961		0.0361635	0.0235667	0.318364
			0.0448611	0.145802	0.323194		0.0362758	0.0235777	0.318713
			0.045	0.145905	0.324197		0.0363881	0.0236268	0.31884
			0.0451389	0.146136	0.324733		0.0365004	0.0238762	0.318919
			0.0452778	0.146729	0.324891		0.0366128	0.023927	0.319486
			0.0454167	0.147035	0.325199		0.0367251	0.0242323	0.319554
			0.0455556	0.147567	0.325461		0.0368374	0.0242494	0.319665
			0.0456944	0.14824	0.326087		0.0369497	0.0243098	0.31984
			0.0458333	0.148315	0.326658		0.037062	0.0243098	0.31987
			0.0459722	0.148361	0.326786		0.0371743	0.0244166	0.32011
			0.0461111	0.148642	0.327397		0.0372866	0.0247642	0.320412
			0.04625	0.148704	0.327613		0.0373989	0.0249398	0.32054
			0.0463889	0.150109	0.327682		0.0375112	0.0249821	0.321082
			0.0465278	0.150278	0.328151		0.0376235	0.0252564	0.321232
			0.0466667	0.150576	0.32833		0.0377358	0.0253548	0.321383
			0.0468056	0.151323	0.328783		0.0378482	0.0254534	0.321857
			0.0469444	0.151795	0.328952		0.0379605	0.0256046	0.321943
			0.0470833	0.152341	0.329368		0.0380728	0.0256776	0.321977
			0.0472222	0.152699	0.329744		0.0381851	0.0258807	0.322092
			0.0473611	0.152963	0.329832		0.0382974	0.0259931	0.322423
			0.0475	0.153149	0.329992		0.0384097	0.0262617	0.322533
			0.0476389	0.153278	0.330064		0.038522	0.0263011	0.322588
			0.0477778	0.15339	0.330336		0.0386343	0.0263846	0.322665
			0.0479167	0.153961	0.330399		0.0387466	0.0264517	0.322778
			0.0480556	0.154253	0.330427		0.0388589	0.0266831	0.322854
			0.0481944	0.154842	0.330555		0.0389712	0.0268779	0.323192
			0.0483333	0.155328	0.33096		0.0390836	0.0268919	0.323567
			0.0484722	0.155477	0.331248		0.0391959	0.0269772	0.323874
			0.0486111	0.155794	0.332199		0.0393082	0.0270072	0.324072
			0.04875	0.156125	0.332497		0.0394205	0.0271226	0.324224
			0.0488889	0.156268	0.332505		0.0395328	0.0272235	0.324958
			0.0490278	0.156708	0.333352		0.0396451	0.0272837	0.325333
			0.0491667	0.156868	0.333595		0.0397574	0.0274651	0.325496
			0.0493056	0.157109	0.334411		0.0398697	0.0277018	0.325873
			0.0494444	0.157592	0.334854		0.039982	0.0277516	0.325987
			0.0495833	0.157781	0.334904		0.0400943	0.0278446	0.32649
			0.0497222	0.159055	0.335344		0.0402066	0.0279232	0.326716
			0.0498611	0.15983	0.335672		0.040319	0.0281741	0.326826
			0.05	0.160049	0.335688		0.0404313	0.028185	0.326936
			0.0501389	0.160091	0.335762		0.0405436	0.0282059	0.327249
			0.0502778	0.1601	0.335985		0.0406559	0.0282311	0.327667
			0.0504167	0.160217	0.336052		0.0407682	0.0284209	0.328229
			0.0505556	0.160607	0.336662		0.0408805	0.0286083	0.328514
			0.0506944	0.160667	0.336795		0.0409928	0.0286984	0.328798
			0.0508333	0.16098	0.336898		0.0411051	0.028733	0.328862
			0.0509722	0.161093	0.337224		0.0412174	0.0289186	0.329362
			0.0511111	0.161291	0.337636		0.0413297	0.0289583	0.32941
			0.05125	0.162615	0.337807		0.041442	0.0293465	0.329701
			0.0513889	0.163141	0.337964		0.0415544	0.0294859	0.329718
			0.0515278	0.16401	0.338173		0.0416667	0.029573	0.329785
			0.0516667	0.164028	0.338176		0.041779	0.0295773	0.330181
			0.0518056	0.164639	0.338383		0.0418913	0.0297298	0.33033
			0.0519444	0.164776	0.338669		0.0420036	0.0297982	0.33072
			0.0520833	0.164896	0.339342		0.0421159	0.0298956	0.33132
			0.0522222	0.165124	0.339568		0.0422282	0.0300457	0.331873
			0.0523611	0.165331	0.339918		0.0423405	0.0301494	0.332496
			0.0525	0.166113	0.340385		0.0424528	0.0302186	0.33266
			0.0526389	0.166148	0.340769		0.0425651	0.0302707	0.332957
			0.0527778	0.166604	0.340898		0.0426774	0.0303501	0.333038
			0.0529167	0.167071	0.341137		0.0427898	0.0304665	0.333777
			0.0530556	0.168068	0.34144		0.0429021	0.0305494	0.334183
			0.0531944	0.17003	0.34146		0.0430144	0.0307258	0.334488
			0.0533333	0.170056	0.341503		0.0431267	0.0307528	0.334921
			0.0534722	0.170348	0.342165		0.043239	0.0309217	0.335218
			0.0536111	0.170939	0.342495		0.0433513	0.0310995	0.336475
			0.05375	0.171216	0.342538		0.0434636	0.0311309	0.336482
			0.0538889	0.172531	0.342727		0.0435759	0.0311939	0.336505
			0.0540278	0.172629	0.343131		0.0436882	0.0312292	0.336631
			0.0541667	0.172695	0.343323		0.0438005	0.0312347	0.336792
			0.0543056	0.173394	0.343367		0.0439128	0.0314032	0.337114
			0.0544444	0.173604	0.343406		0.0440252	0.031684	0.337198
			0.0545833	0.174001	0.343669		0.0441375	0.0317283	0.337349
			0.0547222	0.174027	0.343702		0.0442498	0.031755	0.337607
			0.0548611	0.174093	0.343727		0.0443621	0.0321688	0.337756
			0.055	0.17422	0.343838		0.0444744	0.0324651	0.338103
			0.0551389	0.174327	0.344943		0.0445867	0.0325527	0.338743
			0.0552778	0.174478	0.345408		0.044699	0.0326114	0.339041
			0.0554167	0.174682	0.345422		0.0448113	0.0326819	0.339575
			0.0555556	0.175367	0.345575		0.0449236	0.0329331	0.339754
			0.0556944	0.177016	0.345655		0.0450359	0.0330043	0.339788
			0.0558333	0.177182	0.345883		0.0451482	0.0330378	0.340437
			0.0559722	0.17723	0.345981		0.0452606	0.0331423	0.340554
			0.0561111	0.177599	0.346422		0.0453729	0.0332905	0.341109
			0.05625	0.177682	0.346459		0.0454852	0.0335705	0.34123
			0.0563889	0.177758	0.347083		0.0455975	0.0336589	0.341375
			0.0565278	0.178664	0.347222		0.0457098	0.0336833	0.341385
			0.0566667	0.179353	0.347286		0.0458221	0.0337436	0.341407
			0.0568056	0.180094	0.347371		0.0459344	0.03383	0.341928
			0.0569444	0.180407	0.347478		0.0460467	0.0340046	0.342361
			0.0570833	0.180444	0.347577		0.046159	0.0341612	0.342644
			0.0572222	0.181122	0.347838		0.0462713	0.0343152	0.342688
			0.0573611	0.181126	0.348003		0.0463836	0.0344117	0.342991
			0.0575	0.181488	0.348139		0.046496	0.0346095	0.34317
			0.0576389	0.181558	0.348587		0.0466083	0.0346405	0.343216
			0.0577778	0.181967	0.348588		0.0467206	0.0346604	0.343772
			0.0579167	0.181988	0.348913		0.0468329	0.0348614	0.343795
			0.0580556	0.182057	0.348956		0.0469452	0.0348859	0.344194
			0.0581944	0.182265	0.349123		0.0470575	0.0349754	0.344537
			0.0583333	0.182269	0.349429		0.0471698	0.0351457	0.344633
			0.0584722	0.182369	0.349524		0.0472821	0.0352804	0.34485
			0.0586111	0.183193	0.349999		0.0473944	0.0354985	0.345047
			0.05875	0.183429	0.350067		0.0475067	0.0356424	0.345707
			0.0588889	0.18435	0.350225		0.047619	0.035926	0.345803
			0.0590278	0.185586	0.350557		0.0477314	0.0361611	0.345904
			0.0591667	0.186483	0.350751		0.0478437	0.0362028	0.346778
			0.0593056	0.186744	0.351369		0.047956	0.0362248	0.346888
			0.0594444	0.187959	0.351416		0.0480683	0.0362802	0.347702
			0.0595833	0.188074	0.351828		0.0481806	0.0362894	0.348024
			0.0597222	0.188332	0.35231		0.0482929	0.0364065	0.348276
			0.0598611	0.188737	0.352522		0.0484052	0.036456	0.348715
			0.06	0.188738	0.352548		0.0485175	0.0365119	0.349073
			0.0601389	0.188887	0.35279		0.0486298	0.0366165	0.349439
			0.0602778	0.189167	0.352815		0.0487421	0.0366197	0.349465
			0.0604167	0.189168	0.352992		0.0488544	0.0366267	0.349544
			0.0605556	0.189643	0.353265		0.0489668	0.0366431	0.349753
			0.0606944	0.189841	0.353531		0.0490791	0.0366431	0.350166
			0.0608333	0.19001	0.353642		0.0491914	0.0367175	0.350218
			0.0609722	0.190241	0.353697		0.0493037	0.0367395	0.350357
			0.0611111	0.19026	0.353838		0.049416	0.0370358	0.350359
			0.06125	0.190673	0.354279		0.0495283	0.0371972	0.350457
			0.0613889	0.190781	0.354311		0.0496406	0.0372133	0.350641
			0.0615278	0.191145	0.354474		0.0497529	0.0372996	0.350729
			0.0616667	0.192852	0.354651		0.0498652	0.0375504	0.351704
			0.0618056	0.192923	0.354839		0.0499775	0.037714	0.352156
			0.0619444	0.194142	0.355128		0.0500898	0.037884	0.352745
			0.0620833	0.194395	0.356417		0.0502022	0.0379122	0.353034
			0.0622222	0.194582	0.356487		0.0503145	0.0379934	0.35331
			0.0623611	0.194679	0.356546		0.0504268	0.0380713	0.353407
			0.0625	0.195436	0.356708		0.0505391	0.0387116	0.354802
			0.0626389	0.195565	0.357103		0.0506514	0.0388204	0.35483
			0.0627778	0.195894	0.357222		0.0507637	0.0389558	0.355004
			0.0629167	0.195954	0.357489		0.050876	0.0391348	0.355492
			0.0630556	0.196147	0.357491		0.0509883	0.0391604	0.355969
			0.0631944	0.196249	0.357534		0.0511006	0.0393566	0.356025
			0.0633333	0.196333	0.35792		0.0512129	0.039428	0.357731
			0.0634722	0.196347	0.358261		0.0513252	0.0395025	0.357761
			0.0636111	0.196574	0.358316		0.0514376	0.0395189	0.357764
			0.06375	0.196717	0.358505		0.0515499	0.0396802	0.358191
			0.0638889	0.197357	0.359369		0.0516622	0.0397397	0.358465
			0.0640278	0.197511	0.359852		0.0517745	0.0397958	0.358645
			0.0641667	0.198163	0.360154		0.0518868	0.0402042	0.359086
			0.0643056	0.198861	0.360196		0.0519991	0.0403052	0.359124
			0.0644444	0.199026	0.360269		0.0521114	0.040431	0.359547
			0.0645833	0.19931	0.360276		0.0522237	0.0405209	0.359578
			0.0647222	0.199587	0.360896		0.052336	0.0406841	0.359582
			0.0648611	0.199886	0.360946		0.0524483	0.0408757	0.359598
			0.065	0.200024	0.3611		0.0525606	0.0411192	0.35964
			0.0651389	0.200706	0.361351		0.052673	0.041253	0.359677
			0.0652778	0.201148	0.362504		0.0527853	0.0413564	0.35987
			0.0654167	0.201272	0.362737		0.0528976	0.0413589	0.360053
			0.0655556	0.201863	0.363635		0.0530099	0.0416286	0.360492
			0.0656944	0.202097	0.363836		0.0531222	0.0417092	0.360834
			0.0658333	0.20229	0.363909		0.0532345	0.0417839	0.361147
			0.0659722	0.202396	0.363928		0.0533468	0.0418276	0.361651
			0.0661111	0.202432	0.363987		0.0534591	0.0419954	0.361727
			0.06625	0.202485	0.364585		0.0535714	0.0422592	0.361853
			0.0663889	0.202496	0.365038		0.0536837	0.0423491	0.362247
			0.0665278	0.20326	0.36593		0.053796	0.0426278	0.362265
			0.0666667	0.203755	0.365991		0.0539084	0.0426292	0.362472
			0.0668056	0.204067	0.366694		0.0540207	0.0429755	0.362502
			0.0669444	0.204448	0.366949		0.054133	0.0430506	0.362587
			0.0670833	0.204756	0.367281		0.0542453	0.0433984	0.362977
			0.0672222	0.204853	0.367775		0.0543576	0.0435673	0.362999
			0.0673611	0.205009	0.367883		0.0544699	0.0435787	0.363012
			0.0675	0.205259	0.368229		0.0545822	0.0436172	0.363157
			0.0676389	0.205393	0.368524		0.0546945	0.0436297	0.363167
			0.0677778	0.205655	0.36874		0.0548068	0.0437916	0.364149
			0.0679167	0.206066	0.368922		0.0549191	0.0439297	0.364533
			0.0680556	0.207457	0.369316		0.0550314	0.0440127	0.364748
			0.0681944	0.207585	0.369439		0.0551438	0.0441755	0.364864
			0.0683333	0.207631	0.369993		0.0552561	0.0443473	0.364972
			0.0684722	0.20801	0.37009		0.0553684	0.0449655	0.365043
			0.0686111	0.208206	0.370121		0.0554807	0.0450471	0.365123
			0.06875	0.208349	0.370137		0.055593	0.0451465	0.365132
			0.0688889	0.208466	0.370173		0.0557053	0.0451738	0.36575
			0.0690278	0.208578	0.370399		0.0558176	0.0452702	0.365918
			0.0691667	0.208775	0.370583		0.0559299	0.0453393	0.366037
			0.0693056	0.209601	0.370692		0.0560422	0.0455738	0.366152
			0.0694444	0.209982	0.37085		0.0561545	0.0455898	0.366942
			0.0695833	0.209991	0.370932		0.0562668	0.0456763	0.367046
			0.0697222	0.210013	0.371288		0.0563792	0.0456903	0.367057
			0.0698611	0.211111	0.371557		0.0564915	0.0457736	0.367065
			0.07	0.211332	0.371938		0.0566038	0.0458861	0.367366
			0.0701389	0.211851	0.372116		0.0567161	0.0460299	0.367528
			0.0702778	0.212013	0.372177		0.0568284	0.0462039	0.36794
			0.0704167	0.212111	0.372193		0.0569407	0.0462534	0.368123
			0.0705556	0.212122	0.372249		0.057053	0.046475	0.368459
			0.0706944	0.213044	0.372313		0.0571653	0.0470344	0.368691
			0.0708333	0.213216	0.372559		0.0572776	0.0470532	0.36876
			0.0709722	0.213333	0.372748		0.0573899	0.0472401	0.369077
			0.0711111	0.213489	0.373176		0.0575022	0.0472711	0.369165
			0.07125	0.213528	0.373267		0.0576146	0.0473822	0.369354
			0.0713889	0.213946	0.37327		0.0577269	0.0475703	0.369399
			0.0715278	0.214242	0.373444		0.0578392	0.0476527	0.369868
			0.0716667	0.214535	0.373465		0.0579515	0.04767	0.370206
			0.0718056	0.215479	0.373469		0.0580638	0.0478169	0.37024
			0.0719444	0.216504	0.373608		0.0581761	0.0478286	0.370248
			0.0720833	0.216724	0.373755		0.0582884	0.0478355	0.370406
			0.0722222	0.216833	0.373807		0.0584007	0.047913	0.371254
			0.0723611	0.217136	0.374224		0.058513	0.0479776	0.371351
			0.0725	0.21766	0.374257		0.0586253	0.0480478	0.371678
			0.0726389	0.217756	0.374662		0.0587376	0.0485023	0.372151
			0.0727778	0.21817	0.374937		0.05885	0.0487352	0.372235
			0.0729167	0.218179	0.375354		0.0589623	0.0488704	0.372544
			0.0730556	0.21836	0.375369		0.0590746	0.0491784	0.3726
			0.0731944	0.218597	0.37544		0.0591869	0.0493891	0.372612
			0.0733333	0.218598	0.375482		0.0592992	0.0494005	0.372674
			0.0734722	0.218908	0.375803		0.0594115	0.0497228	0.372725
			0.0736111	0.219024	0.375978		0.0595238	0.0497461	0.372884
			0.07375	0.219299	0.375978		0.0596361	0.049804	0.372961
			0.0738889	0.220017	0.376198		0.0597484	0.0499519	0.373335
			0.0740278	0.220428	0.37627		0.0598607	0.0500703	0.374921
			0.0741667	0.220776	0.376528		0.059973	0.050145	0.374929
			0.0743056	0.220871	0.376828		0.0600854	0.0501652	0.374943
			0.0744444	0.220892	0.377368		0.0601977	0.050234	0.37523
			0.0745833	0.222316	0.377763		0.06031	0.050666	0.375243
			0.0747222	0.22261	0.377871		0.0604223	0.0506978	0.375725
			0.0748611	0.222946	0.37794		0.0605346	0.0507658	0.376696
			0.075	0.223244	0.378012		0.0606469	0.0510129	0.376791
			0.0751389	0.22411	0.378088		0.0607592	0.0510569	0.377599
			0.0752778	0.22456	0.378121		0.0608715	0.0511879	0.377718
			0.0754167	0.225457	0.378599		0.0609838	0.0513825	0.378011
			0.0755556	0.225563	0.378627		0.0610961	0.051474	0.378053
			0.0756944	0.226148	0.37919		0.0612084	0.0514917	0.37812
			0.0758333	0.226654	0.379219		0.0613208	0.0515419	0.378861
			0.0759722	0.226996	0.379572		0.0614331	0.0516711	0.379409
			0.0761111	0.22762	0.379722		0.0615454	0.051997	0.379493
			0.07625	0.227901	0.38005		0.0616577	0.0520192	0.379596
			0.0763889	0.228075	0.380065		0.06177	0.0520708	0.379876
			0.0765278	0.228491	0.381216		0.0618823	0.0522332	0.379971
			0.0766667	0.228735	0.381225		0.0619946	0.0522594	0.380544
			0.0768056	0.229733	0.381361		0.0621069	0.0523876	0.380594
			0.0769444	0.230489	0.381786		0.0622192	0.0524675	0.380843
			0.0770833	0.230801	0.381796		0.0623315	0.0525068	0.380951
			0.0772222	0.231548	0.382127		0.0624438	0.0527017	0.380979
			0.0773611	0.232043	0.382205		0.0625562	0.0529655	0.381959
			0.0775	0.232077	0.38233		0.0626685	0.0533065	0.382146
			0.0776389	0.232549	0.382578		0.0627808	0.0533163	0.382341
			0.0777778	0.23264	0.383304		0.0628931	0.0533443	0.382523
			0.0779167	0.232791	0.383787		0.0630054	0.0534588	0.382607
			0.0780556	0.23332	0.384223		0.0631177	0.0535116	0.382966
			0.0781944	0.233434	0.384687		0.06323	0.0535899	0.383163
			0.0783333	0.233463	0.385154		0.0633423	0.0537336	0.383386
			0.0784722	0.23399	0.385354		0.0634546	0.0539294	0.383419
			0.0786111	0.234468	0.385416		0.0635669	0.0539823	0.383851
			0.07875	0.234569	0.385432		0.0636792	0.0543232	0.383932
			0.0788889	0.23458	0.385656		0.0637916	0.0543589	0.384023
			0.0790278	0.234788	0.385893		0.0639039	0.0543933	0.38413
			0.0791667	0.235131	0.386066		0.0640162	0.0544441	0.3844
			0.0793056	0.235176	0.386313		0.0641285	0.0544773	0.384437
			0.0794444	0.235513	0.38632		0.0642408	0.0545226	0.384755
			0.0795833	0.236003	0.386667		0.0643531	0.0545526	0.385411
			0.0797222	0.236006	0.386814		0.0644654	0.0546431	0.38567
			0.0798611	0.236045	0.387214		0.0645777	0.0546561	0.385747
			0.08	0.236171	0.387397		0.06469	0.0547729	0.385817
			0.0801389	0.236317	0.387419		0.0648023	0.0548123	0.385921
			0.0802778	0.236327	0.388039		0.0649146	0.0548473	0.386059
			0.0804167	0.236472	0.388574		0.065027	0.0548622	0.386517
			0.0805556	0.236618	0.388649		0.0651393	0.0549266	0.387407
			0.0806944	0.236648	0.388749		0.0652516	0.0551114	0.38752
			0.0808333	0.236917	0.389924		0.0653639	0.0552304	0.387952
			0.0809722	0.237014	0.389953		0.0654762	0.0554338	0.388026
			0.0811111	0.237146	0.389987		0.0655885	0.0554369	0.388061
			0.08125	0.237443	0.390026		0.0657008	0.0557122	0.38815
			0.0813889	0.237599	0.390447		0.0658131	0.0557122	0.388314
			0.0815278	0.23779	0.390509		0.0659254	0.0560454	0.388568
			0.0816667	0.237915	0.390741		0.0660377	0.0560643	0.388716
			0.0818056	0.238032	0.390772		0.06615	0.0561208	0.388923
			0.0819444	0.238114	0.391086		0.0662624	0.0562576	0.389277
			0.0820833	0.238561	0.391598		0.0663747	0.0562661	0.389444
			0.0822222	0.23897	0.391979		0.066487	0.0563419	0.389546
			0.0823611	0.239009	0.392221		0.0665993	0.0564683	0.389654
			0.0825	0.23903	0.392458		0.0667116	0.0565482	0.389717
			0.0826389	0.239057	0.392812		0.0668239	0.0566304	0.389885
			0.0827778	0.239103	0.3929		0.0669362	0.0567061	0.390038
			0.0829167	0.239547	0.393112		0.0670485	0.0567096	0.390101
			0.0830556	0.24033	0.393146		0.0671608	0.0568732	0.390271
			0.0831944	0.24061	0.393186		0.0672731	0.0571587	0.390336
			0.0833333	0.241039	0.393469		0.0673854	0.0573526	0.39063
			0.0834722	0.241797	0.393818		0.0674978	0.0574387	0.390664
			0.0836111	0.242401	0.394691		0.0676101	0.0575502	0.390783
			0.08375	0.243101	0.394897		0.0677224	0.0576459	0.390807
			0.0838889	0.243335	0.395348		0.0678347	0.0577281	0.390973
			0.0840278	0.243713	0.395398		0.067947	0.0577334	0.39148
			0.0841667	0.243965	0.395752		0.0680593	0.0578225	0.391524
			0.0843056	0.244212	0.396131		0.0681716	0.0580335	0.391524
			0.0844444	0.244254	0.396283		0.0682839	0.058099	0.391658
			0.0845833	0.244378	0.396467		0.0683962	0.0582803	0.39167
			0.0847222	0.244875	0.396502		0.0685085	0.0584023	0.391932
			0.0848611	0.245054	0.396587		0.0686208	0.0586238	0.392103
			0.085	0.245248	0.396693		0.0687332	0.0586829	0.392166
			0.0851389	0.245715	0.397027		0.0688455	0.0587261	0.392405
			0.0852778	0.245843	0.397554		0.0689578	0.0589717	0.39241
			0.0854167	0.245894	0.397824		0.0690701	0.058972	0.392624
			0.0855556	0.246241	0.399084		0.0691824	0.0591111	0.392732
			0.0856944	0.246567	0.399096		0.0692947	0.0594438	0.393037
			0.0858333	0.246864	0.399288		0.069407	0.059465	0.393293
			0.0859722	0.247338	0.400037		0.0695193	0.059615	0.393478
			0.0861111	0.247769	0.400247		0.0696316	0.05963	0.393534
			0.08625	0.247781	0.400298		0.0697439	0.0599157	0.393562
			0.0863889	0.247945	0.400415		0.0698562	0.0599385	0.393686
			0.0865278	0.249018	0.400449		0.0699686	0.0599612	0.394028
			0.0866667	0.249322	0.400452		0.0700809	0.0600969	0.394758
			0.0868056	0.250272	0.400637		0.0701932	0.0601335	0.395032
			0.0869444	0.250718	0.400874		0.0703055	0.0603985	0.395053
			0.0870833	0.250814	0.401151		0.0704178	0.0604119	0.395346
			0.0872222	0.251001	0.401455		0.0705301	0.0604144	0.395519
			0.0873611	0.251783	0.401533		0.0706424	0.0605513	0.396119
			0.0875	0.251962	0.402282		0.0707547	0.0605753	0.396196
			0.0876389	0.252045	0.402372		0.070867	0.0606217	0.396492
			0.0877778	0.25207	0.402571		0.0709793	0.060712	0.396723
			0.0879167	0.252128	0.40268		0.0710916	0.0607627	0.397185
			0.0880556	0.252229	0.403181		0.071204	0.0612441	0.397264
			0.0881944	0.252282	0.403252		0.0713163	0.0614022	0.397295
			0.0883333	0.252802	0.403361		0.0714286	0.0614422	0.397515
			0.0884722	0.252861	0.403446		0.0715409	0.0615862	0.397756
			0.0886111	0.253139	0.403796		0.0716532	0.0616456	0.3978
			0.08875	0.253682	0.403832		0.0717655	0.0616635	0.397802
			0.0888889	0.253821	0.404488		0.0718778	0.0618306	0.39791
			0.0890278	0.254227	0.404719		0.0719901	0.0622388	0.398113
			0.0891667	0.254392	0.404918		0.0721024	0.0622734	0.398235
			0.0893056	0.2546	0.404922		0.0722147	0.0622846	0.398299
			0.0894444	0.254957	0.404926		0.072327	0.0623985	0.398353
			0.0895833	0.255111	0.405486		0.0724394	0.062414	0.398417
			0.0897222	0.255211	0.405985		0.0725517	0.0625328	0.398485
			0.0898611	0.255574	0.406489		0.072664	0.062597	0.398682
			0.09	0.255715	0.406755		0.0727763	0.0628344	0.398714
			0.0901389	0.25587	0.408017		0.0728886	0.0628906	0.398879
			0.0902778	0.256003	0.408272		0.0730009	0.062946	0.398962
			0.0904167	0.256482	0.408363		0.0731132	0.06296	0.399071
			0.0905556	0.256782	0.408384		0.0732255	0.0633373	0.399087
			0.0906944	0.256784	0.409036		0.0733378	0.0634172	0.399163
			0.0908333	0.257113	0.409562		0.0734501	0.063514	0.399304
			0.0909722	0.257364	0.409564		0.0735624	0.0638538	0.39936
			0.0911111	0.25771	0.41002		0.0736748	0.0640222	0.399604
			0.09125	0.258074	0.410767		0.0737871	0.064023	0.400059
			0.0913889	0.258299	0.410809		0.0738994	0.0640432	0.400133
			0.0915278	0.25887	0.410906		0.0740117	0.0643329	0.400232
			0.0916667	0.259022	0.411047		0.074124	0.0643621	0.400235
			0.0918056	0.259115	0.411085		0.0742363	0.0645906	0.400274
			0.0919444	0.259147	0.411175		0.0743486	0.0646317	0.400619
			0.0920833	0.259156	0.411337		0.0744609	0.0646424	0.40064
			0.0922222	0.259282	0.411571		0.0745732	0.0646916	0.400743
			0.0923611	0.259347	0.411635		0.0746855	0.0647331	0.400755
			0.0925	0.259635	0.411678		0.0747978	0.064881	0.400862
			0.0926389	0.259738	0.411718		0.0749102	0.0648844	0.401794
			0.0927778	0.259996	0.412011		0.0750225	0.0649208	0.402079
			0.0929167	0.260276	0.41239		0.0751348	0.0649591	0.40216
			0.0930556	0.26035	0.412562		0.0752471	0.0652629	0.40222
			0.0931944	0.260395	0.412922		0.0753594	0.0652857	0.402518
			0.0933333	0.260766	0.412964		0.0754717	0.0652866	0.402809
			0.0934722	0.261114	0.413386		0.075584	0.0653088	0.403331
			0.0936111	0.261343	0.413579		0.0756963	0.0653146	0.40359
			0.09375	0.261743	0.413614		0.0758086	0.0654065	0.403636
			0.0938889	0.261948	0.413639		0.0759209	0.0655272	0.40395
			0.0940278	0.262487	0.414022		0.0760332	0.0656451	0.403974
			0.0941667	0.26296	0.414403		0.0761456	0.0656955	0.40401
			0.0943056	0.26298	0.414512		0.0762579	0.0657194	0.404164
			0.0944444	0.262989	0.414839		0.0763702	0.065728	0.40448
			0.0945833	0.26335	0.415062		0.0764825	0.0657457	0.405012
			0.0947222	0.263388	0.415193		0.0765948	0.0658406	0.405921
			0.0948611	0.263503	0.415556		0.0767071	0.0658663	0.406178
			0.095	0.263554	0.415711		0.0768194	0.0659688	0.40631
			0.0951389	0.263815	0.415807		0.0769317	0.0660191	0.406398
			0.0952778	0.264006	0.416037		0.077044	0.0660444	0.406748
			0.0954167	0.264435	0.416063		0.0771563	0.0664798	0.406975
			0.0955556	0.264736	0.416299		0.0772686	0.0666095	0.407005
			0.0956944	0.264807	0.417164		0.077381	0.0666135	0.40768
			0.0958333	0.264817	0.417242		0.0774933	0.0666821	0.407692
			0.0959722	0.264818	0.417497		0.0776056	0.0666963	0.407707
			0.0961111	0.265034	0.417566		0.0777179	0.0668688	0.40802
			0.09625	0.265683	0.417965		0.0778302	0.0671011	0.408099
			0.0963889	0.265749	0.417978		0.0779425	0.067761	0.408135
			0.0965278	0.26582	0.418019		0.0780548	0.0678172	0.408197
			0.0966667	0.266254	0.418057		0.0781671	0.0678952	0.408264
			0.0968056	0.266389	0.418071		0.0782794	0.0679046	0.408326
			0.0969444	0.267113	0.418112		0.0783917	0.067978	0.408595
			0.0970833	0.267205	0.418311		0.078504	0.0680323	0.40886
			0.0972222	0.267692	0.418367		0.0786164	0.0680874	0.408886
			0.0973611	0.267728	0.418533		0.0787287	0.068098	0.409146
			0.0975	0.268041	0.418782		0.078841	0.0680995	0.409259
			0.0976389	0.268421	0.419113		0.0789533	0.068393	0.409331
			0.0977778	0.268736	0.419304		0.0790656	0.0683933	0.409434
			0.0979167	0.268959	0.419814		0.0791779	0.0685679	0.409456
			0.0980556	0.269007	0.419925		0.0792902	0.0687174	0.409497
			0.0981944	0.269036	0.420071		0.0794025	0.0689036	0.409606
			0.0983333	0.269237	0.420894		0.0795148	0.0689537	0.409772
			0.0984722	0.26959	0.420988		0.0796271	0.0689616	0.409787
			0.0986111	0.270457	0.421512		0.0797394	0.0690066	0.410335
			0.09875	0.270498	0.421569		0.0798518	0.0690333	0.410752
			0.0988889	0.271332	0.421884		0.0799641	0.0691316	0.410981
			0.0990278	0.271938	0.422075		0.0800764	0.0691843	0.411194
			0.0991667	0.272687	0.422289		0.0801887	0.069415	0.411513
			0.0993056	0.273498	0.422477		0.080301	0.0694169	0.411726
			0.0994444	0.273737	0.422621		0.0804133	0.0694296	0.412045
			0.0995833	0.274105	0.42282		0.0805256	0.0695184	0.412176
			0.0997222	0.274132	0.423064		0.0806379	0.069525	0.412386
			0.0998611	0.274403	0.423074		0.0807502	0.0697007	0.412513
			0.1	0.274666	0.423147		0.0808625	0.0699493	0.412631
			0.100139	0.274731	0.42321		0.0809748	0.0700033	0.412651
			0.100278	0.27494	0.423516		0.0810872	0.0700941	0.41343
			0.100417	0.275773	0.42409		0.0811995	0.0702026	0.413611
			0.100556	0.276351	0.42442		0.0813118	0.0702203	0.413815
			0.100694	0.276748	0.424547		0.0814241	0.0702741	0.414028
			0.100833	0.276775	0.424671		0.0815364	0.0703321	0.414136
			0.100972	0.277074	0.424758		0.0816487	0.07038	0.414218
			0.101111	0.27731	0.424775		0.081761	0.0707321	0.414289
			0.10125	0.277763	0.424915		0.0818733	0.0710532	0.414379
			0.101389	0.278239	0.424931		0.0819856	0.0710876	0.414426
			0.101528	0.279446	0.424935		0.0820979	0.0711409	0.414911
			0.101667	0.279482	0.425166		0.0822102	0.0711682	0.415117
			0.101806	0.27951	0.425529		0.0823226	0.0713244	0.415771
			0.101944	0.27965	0.425788		0.0824349	0.0715024	0.416161
			0.102083	0.279752	0.425865		0.0825472	0.0715445	0.416229
			0.102222	0.280826	0.42601		0.0826595	0.0715513	0.416841
			0.102361	0.280917	0.426488		0.0827718	0.0715882	0.417126
			0.1025	0.281111	0.426612		0.0828841	0.0716841	0.417167
			0.102639	0.28222	0.426979		0.0829964	0.0717097	0.417506
			0.102778	0.282223	0.427084		0.0831087	0.0717223	0.417532
			0.102917	0.28259	0.427113		0.083221	0.0717548	0.417568
			0.103056	0.282802	0.427123		0.0833333	0.0718274	0.418136
			0.103194	0.28356	0.427153		0.0834456	0.0720605	0.418163
			0.103333	0.28416	0.42722		0.083558	0.0720628	0.418247
			0.103472	0.284327	0.42735		0.0836703	0.0721886	0.418467
			0.103611	0.28445	0.427355		0.0837826	0.0723019	0.418631
			0.10375	0.285344	0.427675		0.0838949	0.0724165	0.418659
			0.103889	0.2854	0.427695		0.0840072	0.072534	0.418865
			0.104028	0.286244	0.427915		0.0841195	0.0725566	0.418971
			0.104167	0.286457	0.427956		0.0842318	0.0725707	0.419114
			0.104306	0.286818	0.42804		0.0843441	0.0725989	0.419172
			0.104444	0.287212	0.428175		0.0844564	0.072699	0.419409
			0.104583	0.287401	0.428311		0.0845687	0.0728509	0.419439
			0.104722	0.287507	0.428389		0.084681	0.0729003	0.41979
			0.104861	0.287528	0.429036		0.0847934	0.0732945	0.419809
			0.105	0.287683	0.429078		0.0849057	0.0733231	0.419845
			0.105139	0.287944	0.42909		0.085018	0.0733619	0.419872
			0.105278	0.288039	0.42972		0.0851303	0.0734331	0.419914
			0.105417	0.289303	0.430051		0.0852426	0.0734998	0.420059
			0.105556	0.289305	0.430424		0.0853549	0.0735463	0.420414
			0.105694	0.289412	0.430493		0.0854672	0.0735834	0.420671
			0.105833	0.289527	0.43066		0.0855795	0.0738703	0.420706
			0.105972	0.289998	0.430665		0.0856918	0.0739341	0.421221
			0.106111	0.290049	0.430694		0.0858041	0.0739834	0.421304
			0.10625	0.290141	0.43101		0.0859164	0.0741003	0.421342
			0.106389	0.290511	0.431256		0.0860288	0.0741691	0.421605
			0.106528	0.290802	0.431835		0.0861411	0.0742092	0.422068
			0.106667	0.291082	0.431851		0.0862534	0.0743332	0.422154
			0.106806	0.291473	0.431978		0.0863657	0.0743911	0.42238
			0.106944	0.291976	0.432791		0.086478	0.0745591	0.422397
			0.107083	0.29212	0.432863		0.0865903	0.0745653	0.422519
			0.107222	0.292495	0.433193		0.0867026	0.0746376	0.422543
			0.107361	0.292582	0.433205		0.0868149	0.0746785	0.42302
			0.1075	0.292795	0.433317		0.0869272	0.0747154	0.423165
			0.107639	0.293212	0.433543		0.0870395	0.0747217	0.423894
			0.107778	0.293294	0.434047		0.0871518	0.0747606	0.424391
			0.107917	0.293305	0.434203		0.0872642	0.0748596	0.424736
			0.108056	0.293331	0.434514		0.0873765	0.0749704	0.424784
			0.108194	0.293507	0.434973		0.0874888	0.0750018	0.425147
			0.108333	0.293838	0.435155		0.0876011	0.0750018	0.425157
			0.108472	0.29397	0.435298		0.0877134	0.0750097	0.425569
			0.108611	0.294256	0.435324		0.0878257	0.075037	0.42593
			0.10875	0.294305	0.43533		0.087938	0.0751419	0.426022
			0.108889	0.295045	0.435401		0.0880503	0.0753325	0.426032
			0.109028	0.295182	0.435736		0.0881626	0.0753994	0.426071
			0.109167	0.295372	0.436012		0.0882749	0.0754294	0.426082
			0.109306	0.295413	0.43644		0.0883872	0.0755779	0.426214
			0.109444	0.295507	0.436454		0.0884996	0.0755823	0.426367
			0.109583	0.295538	0.436588		0.0886119	0.0757042	0.426738
			0.109722	0.295631	0.437344		0.0887242	0.0757309	0.4268
			0.109861	0.295708	0.437549		0.0888365	0.0757922	0.427327
			0.11	0.295807	0.438014		0.0889488	0.0758088	0.427388
			0.110139	0.296187	0.43812		0.0890611	0.0758571	0.427485
			0.110278	0.29651	0.438251		0.0891734	0.0759201	0.428146
			0.110417	0.296563	0.438461		0.0892857	0.0759829	0.428366
			0.110556	0.29674	0.438893		0.089398	0.0759849	0.428424
			0.110694	0.297487	0.439354		0.0895103	0.0760873	0.428835
			0.110833	0.297539	0.439387		0.0896226	0.0761264	0.428984
			0.110972	0.299133	0.439463		0.089735	0.0761656	0.429134
			0.111111	0.299517	0.439574		0.0898473	0.0762134	0.429136
			0.11125	0.299781	0.439646		0.0899596	0.0762208	0.429254
			0.111389	0.300137	0.439813		0.0900719	0.076248	0.429971
			0.111528	0.30016	0.44006		0.0901842	0.0763549	0.430014
			0.111667	0.300371	0.440658		0.0902965	0.0764398	0.430198
			0.111806	0.30088	0.441192		0.0904088	0.0766517	0.430417
			0.111944	0.300881	0.441263		0.0905211	0.0767256	0.430498
			0.112083	0.300892	0.44136		0.0906334	0.0768916	0.431022
			0.112222	0.303332	0.441667		0.0907457	0.0769195	0.431165
			0.112361	0.303373	0.441768		0.090858	0.0770736	0.431289
			0.1125	0.304334	0.441786		0.0909704	0.0773411	0.432072
			0.112639	0.304387	0.442296		0.0910827	0.0776925	0.432384
			0.112778	0.304658	0.442454		0.091195	0.0777397	0.432549
			0.112917	0.304861	0.4427		0.0913073	0.0778003	0.432576
			0.113056	0.305002	0.442824		0.0914196	0.0779474	0.432585
			0.113194	0.305086	0.442984		0.0915319	0.0779906	0.432963
			0.113333	0.305317	0.443053		0.0916442	0.078025	0.433436
			0.113472	0.305942	0.443056		0.0917565	0.0780985	0.433455
			0.113611	0.305955	0.443669		0.0918688	0.0781045	0.43386
			0.11375	0.306059	0.44464		0.0919811	0.0782282	0.434028
			0.113889	0.306255	0.444799		0.0920934	0.0783316	0.434102
			0.114028	0.306292	0.44485		0.0922058	0.0785053	0.434506
			0.114167	0.306764	0.444894		0.0923181	0.078507	0.434525
			0.114306	0.307542	0.445098		0.0924304	0.0785836	0.434971
			0.114444	0.307827	0.445308		0.0925427	0.0786832	0.435087
			0.114583	0.307983	0.445615		0.092655	0.0788117	0.435477
			0.114722	0.308416	0.44573		0.0927673	0.0789863	0.435602
			0.114861	0.309133	0.445742		0.0928796	0.0790701	0.435765
			0.115	0.309172	0.445801		0.0929919	0.0790752	0.436069
			0.115139	0.309588	0.446		0.0931042	0.0791884	0.437419
			0.115278	0.309719	0.446102		0.0932165	0.0792749	0.43752
			0.115417	0.310082	0.446553		0.0933288	0.0792984	0.437659
			0.115556	0.310226	0.446631		0.0934412	0.0793658	0.437727
			0.115694	0.310254	0.446942		0.0935535	0.0793975	0.437949
			0.115833	0.310445	0.447085		0.0936658	0.0795576	0.438081
			0.115972	0.310582	0.44736		0.0937781	0.0796385	0.43839
			0.116111	0.310922	0.447523		0.0938904	0.0797045	0.438488
			0.11625	0.311061	0.447909		0.0940027	0.079881	0.438501
			0.116389	0.311349	0.448334		0.094115	0.0799582	0.438768
			0.116528	0.311617	0.448393		0.0942273	0.0799883	0.438872
			0.116667	0.31163	0.448506		0.0943396	0.0799886	0.439098
			0.116806	0.311671	0.448804		0.0944519	0.0802099	0.439345
			0.116944	0.311757	0.449048		0.0945642	0.0804417	0.439355
			0.117083	0.312143	0.449158		0.0946765	0.0805249	0.439425
			0.117222	0.312944	0.449168		0.0947889	0.0810355	0.439433
			0.117361	0.313185	0.449824		0.0949012	0.0810556	0.44039
			0.1175	0.313186	0.449838		0.0950135	0.081157	0.440425
			0.117639	0.313253	0.449954		0.0951258	0.0811841	0.440462
			0.117778	0.314663	0.450073		0.0952381	0.0811972	0.440502
			0.117917	0.314682	0.450194		0.0953504	0.0812223	0.440697
			0.118056	0.315228	0.450388		0.0954627	0.0812407	0.440839
			0.118194	0.3156	0.450442		0.095575	0.0817015	0.440857
			0.118333	0.31643	0.450629		0.0956873	0.0817069	0.440979
			0.118472	0.317019	0.450856		0.0957996	0.0818518	0.440995
			0.118611	0.317537	0.451689		0.0959119	0.0823621	0.442244
			0.11875	0.317634	0.451978		0.0960243	0.0823735	0.442278
			0.118889	0.317901	0.452059		0.0961366	0.0823907	0.442486
			0.119028	0.317948	0.452338		0.0962489	0.0823947	0.442539
			0.119167	0.318013	0.452449		0.0963612	0.0824067	0.442689
			0.119306	0.318094	0.452532		0.0964735	0.0825141	0.442897
			0.119444	0.318618	0.453096		0.0965858	0.0827041	0.442921
			0.119583	0.318762	0.453129		0.0966981	0.0827474	0.442935
			0.119722	0.318796	0.453492		0.0968104	0.0828225	0.443088
			0.119861	0.318858	0.453641		0.0969227	0.0828944	0.443223
			0.12	0.319171	0.453786		0.097035	0.0830425	0.443511
			0.120139	0.319214	0.454319		0.0971473	0.0832322	0.443738
			0.120278	0.319576	0.454525		0.0972597	0.0833347	0.443798
			0.120417	0.319759	0.454603		0.097372	0.0834732	0.444148
			0.120556	0.31991	0.455094		0.0974843	0.0836776	0.444421
			0.120694	0.320505	0.455097		0.0975966	0.0837273	0.444743
			0.120833	0.320896	0.455115		0.0977089	0.0838658	0.444873
			0.120972	0.320944	0.455183		0.0978212	0.0839438	0.445041
			0.121111	0.321796	0.45533		0.0979335	0.0840392	0.445266
			0.12125	0.322411	0.455386		0.0980458	0.0841107	0.445419
			0.121389	0.323262	0.455541		0.0981581	0.0841786	0.445534
			0.121528	0.323384	0.455576		0.0982704	0.0841984	0.445834
			0.121667	0.323566	0.455708		0.0983827	0.0844204	0.445871
			0.121806	0.32357	0.45577		0.0984951	0.0848046	0.445913
			0.121944	0.323602	0.455771		0.0986074	0.0848404	0.446029
			0.122083	0.323795	0.455902		0.0987197	0.0848666	0.446042
			0.122222	0.323796	0.455976		0.098832	0.0851302	0.446407
			0.122361	0.324132	0.455977		0.0989443	0.0853124	0.446578
			0.1225	0.324179	0.456238		0.0990566	0.0853545	0.446741
			0.122639	0.324253	0.456344		0.0991689	0.085396	0.446913
			0.122778	0.324338	0.457172		0.0992812	0.0855962	0.447066
			0.122917	0.324809	0.457283		0.0993935	0.0856857	0.447181
			0.123056	0.324929	0.457296		0.0995058	0.0858103	0.447261
			0.123194	0.32497	0.457765		0.0996181	0.0858282	0.447605
			0.123333	0.325294	0.457899		0.0997305	0.0858624	0.447852
			0.123472	0.32548	0.457933		0.0998428	0.0858722	0.44799
			0.123611	0.325634	0.458038		0.0999551	0.0863673	0.448171
			0.12375	0.325701	0.45863		0.100067	0.0864309	0.448577
			0.123889	0.3258	0.45904		0.10018	0.0865567	0.449184
			0.124028	0.325903	0.45931		0.100292	0.086575	0.449272
			0.124167	0.326151	0.4594		0.100404	0.0866447	0.449492
			0.124306	0.326188	0.459634		0.100517	0.0870309	0.449644
			0.124444	0.326431	0.459823		0.100629	0.0870338	0.450084
			0.124583	0.326952	0.459834		0.100741	0.0871485	0.450101
			0.124722	0.326981	0.460056		0.100854	0.0872753	0.45012
			0.124861	0.327009	0.460074		0.100966	0.0873551	0.450263
			0.125	0.327055	0.460615		0.101078	0.0873885	0.450321
			0.125139	0.32708	0.46069		0.10119	0.0874047	0.450469
			0.125278	0.327292	0.460806		0.101303	0.0874365	0.450513
			0.125417	0.327372	0.46087		0.101415	0.0875542	0.450582
			0.125556	0.327875	0.460873		0.101527	0.0875722	0.450965
			0.125694	0.328086	0.461275		0.10164	0.0875772	0.451276
			0.125833	0.328413	0.461529		0.101752	0.0876637	0.451317
			0.125972	0.328807	0.461645		0.101864	0.087678	0.451359
			0.126111	0.328904	0.461792		0.101977	0.0876889	0.45137
			0.12625	0.328974	0.461859		0.102089	0.0877634	0.45139
			0.126389	0.329012	0.461999		0.102201	0.0877782	0.451407
			0.126528	0.329057	0.462255		0.102314	0.0877936	0.451488
			0.126667	0.329601	0.462271		0.102426	0.0878216	0.451625
			0.126806	0.329994	0.462554		0.102538	0.0878226	0.451665
			0.126944	0.330197	0.462659		0.10265	0.0878414	0.452868
			0.127083	0.330209	0.463035		0.102763	0.0879004	0.453126
			0.127222	0.330465	0.463302		0.102875	0.0881644	0.453337
			0.127361	0.330565	0.463531		0.102987	0.0884416	0.453402
			0.1275	0.330565	0.463774		0.1031	0.0884625	0.453472
			0.127639	0.330633	0.464007		0.103212	0.0884871	0.45349
			0.127778	0.330664	0.464336		0.103324	0.0885346	0.45395
			0.127917	0.330681	0.464758		0.103437	0.0886413	0.454142
			0.128056	0.331073	0.464774		0.103549	0.0887334	0.454367
			0.128194	0.331559	0.464879		0.103661	0.0888068	0.454383
			0.128333	0.332164	0.464997		0.103774	0.089046	0.45496
			0.128472	0.332512	0.465135		0.103886	0.0891039	0.455339
			0.128611	0.332534	0.465423		0.103998	0.0891104	0.455345
			0.12875	0.332763	0.465539		0.104111	0.0891449	0.455564
			0.128889	0.332776	0.466027		0.104223	0.0892197	0.455678
			0.129028	0.332912	0.466378		0.104335	0.0893171	0.455957
			0.129167	0.333335	0.46638		0.104447	0.0893616	0.455974
			0.129306	0.333356	0.466469		0.10456	0.0894488	0.456571
			0.129444	0.333492	0.466668		0.104672	0.0894565	0.456587
			0.129583	0.333626	0.466734		0.104784	0.0895419	0.456963
			0.129722	0.333719	0.467108		0.104897	0.0895611	0.457017
			0.129861	0.333746	0.467689		0.105009	0.0896249	0.457719
			0.13	0.334037	0.467741		0.105121	0.0897926	0.457771
			0.130139	0.33414	0.467814		0.105234	0.0897987	0.458026
			0.130278	0.334738	0.468286		0.105346	0.0898241	0.458044
			0.130417	0.33528	0.468371		0.105458	0.0898771	0.458244
			0.130556	0.335489	0.468415		0.105571	0.0900214	0.458269
			0.130694	0.336162	0.468458		0.105683	0.0900429	0.458404
			0.130833	0.336412	0.468468		0.105795	0.0900951	0.458596
			0.130972	0.33654	0.468527		0.105907	0.0901537	0.45874
			0.131111	0.336775	0.468654		0.10602	0.09036	0.458888
			0.13125	0.337106	0.46879		0.106132	0.0904035	0.45901
			0.131389	0.337357	0.469129		0.106244	0.0905398	0.459115
			0.131528	0.337399	0.469189		0.106357	0.0906168	0.459324
			0.131667	0.337522	0.469273		0.106469	0.0907231	0.459686
			0.131806	0.33796	0.469289		0.106581	0.0907797	0.459745
			0.131944	0.338141	0.469718		0.106694	0.0907961	0.459856
			0.132083	0.338308	0.470776		0.106806	0.0908322	0.459926
			0.132222	0.338322	0.47097		0.106918	0.0910801	0.460639
			0.132361	0.338533	0.471302		0.107031	0.091152	0.460836
			0.1325	0.338941	0.471357		0.107143	0.0912142	0.46124
			0.132639	0.339048	0.47138		0.107255	0.0912717	0.461255
			0.132778	0.339402	0.471419		0.107367	0.0913114	0.461322
			0.132917	0.339805	0.471465		0.10748	0.0913585	0.461508
			0.133056	0.340026	0.471471		0.107592	0.0914843	0.461542
			0.133194	0.340968	0.47154		0.107704	0.0915734	0.461619
			0.133333	0.341493	0.47156		0.107817	0.0915976	0.461683
			0.133472	0.341612	0.471724		0.107929	0.0916189	0.462096
			0.133611	0.341704	0.47184		0.108041	0.0916995	0.462156
			0.13375	0.342057	0.471938		0.108154	0.0917156	0.462313
			0.133889	0.342911	0.472097		0.108266	0.091741	0.462489
			0.134028	0.342984	0.472146		0.108378	0.0918562	0.462538
			0.134167	0.343277	0.472364		0.108491	0.0919609	0.462971
			0.134306	0.343454	0.472502		0.108603	0.0920444	0.463628
			0.134444	0.343575	0.472528		0.108715	0.0920681	0.464026
			0.134583	0.344237	0.472955		0.108827	0.0920869	0.464952
			0.134722	0.34439	0.473055		0.10894	0.0921995	0.464989
			0.134861	0.344451	0.473273		0.109052	0.0922296	0.465498
			0.135	0.345096	0.473441		0.109164	0.0922394	0.465548
			0.135139	0.346345	0.473516		0.109277	0.0924248	0.465702
			0.135278	0.346373	0.473523		0.109389	0.0924496	0.465769
			0.135417	0.346428	0.474411		0.109501	0.0924663	0.465918
			0.135556	0.346448	0.474459		0.109614	0.0924721	0.46609
			0.135694	0.346625	0.474489		0.109726	0.0925319	0.466169
			0.135833	0.347172	0.474518		0.109838	0.0925396	0.466303
			0.135972	0.347255	0.474631		0.109951	0.0926983	0.466374
			0.136111	0.347438	0.474771		0.110063	0.0929058	0.466495
			0.13625	0.347608	0.474848		0.110175	0.0929163	0.467046
			0.136389	0.347799	0.475162		0.110288	0.0932007	0.467112
			0.136528	0.348327	0.475244		0.1104	0.0932455	0.46738
			0.136667	0.348373	0.475431		0.110512	0.0934002	0.467556
			0.136806	0.348387	0.475539		0.110624	0.0934027	0.46778
			0.136944	0.34863	0.475686		0.110737	0.0934834	0.468668
			0.137083	0.348755	0.475727		0.110849	0.0935128	0.468942
			0.137222	0.349344	0.475738		0.110961	0.0936436	0.469091
			0.137361	0.349803	0.476273		0.111074	0.0936637	0.469154
			0.1375	0.349897	0.476309		0.111186	0.0936772	0.469644
			0.137639	0.35078	0.476353		0.111298	0.0938455	0.469647
			0.137778	0.350941	0.476357		0.111411	0.0939101	0.469667
			0.137917	0.35125	0.476376		0.111523	0.0940018	0.469825
			0.138056	0.351264	0.476485		0.111635	0.0940489	0.470084
			0.138194	0.351769	0.476633		0.111748	0.0942013	0.470286
			0.138333	0.352537	0.476774		0.11186	0.0942127	0.470391
			0.138472	0.352988	0.476926		0.111972	0.094377	0.470462
			0.138611	0.353012	0.476951		0.112084	0.0944754	0.470603
			0.13875	0.35302	0.477019		0.112197	0.0946082	0.470748
			0.138889	0.353254	0.477044		0.112309	0.0946093	0.470825
			0.139028	0.353823	0.47745		0.112421	0.0948769	0.471047
			0.139167	0.353876	0.477765		0.112534	0.0949342	0.471074
			0.139306	0.353912	0.477889		0.112646	0.0949787	0.471825
			0.139444	0.354197	0.477891		0.112758	0.0950258	0.472107
			0.139583	0.354443	0.478232		0.112871	0.0951987	0.472163
			0.139722	0.354509	0.478244		0.112983	0.0952272	0.472512
			0.139861	0.355049	0.478263		0.113095	0.095238	0.472833
			0.14	0.356029	0.478335		0.113208	0.0953353	0.473023
			0.140139	0.356086	0.478598		0.11332	0.0953679	0.473943
			0.140278	0.356551	0.478621		0.113432	0.0954541	0.474107
			0.140417	0.356633	0.478691		0.113544	0.0954827	0.474439
			0.140556	0.356937	0.478973		0.113657	0.0955099	0.474919
			0.140694	0.356969	0.479041		0.113769	0.0956431	0.475133
			0.140833	0.357298	0.479415		0.113881	0.0957144	0.475585
			0.140972	0.357492	0.479777		0.113994	0.0957697	0.475646
			0.141111	0.357707	0.479898		0.114106	0.0958633	0.47574
			0.14125	0.357719	0.480371		0.114218	0.096067	0.475885
			0.141389	0.357775	0.480565		0.114331	0.0960819	0.476244
			0.141528	0.358217	0.480792		0.114443	0.0961189	0.476603
			0.141667	0.358535	0.480829		0.114555	0.0961976	0.476896
			0.141806	0.359377	0.481417		0.114668	0.0962273	0.476911
			0.141944	0.359607	0.481484		0.11478	0.0962984	0.477078
			0.142083	0.359704	0.481758		0.114892	0.096412	0.477324
			0.142222	0.35976	0.482171		0.115004	0.0966191	0.477405
			0.142361	0.35982	0.482314		0.115117	0.0966704	0.477424
			0.1425	0.36003	0.482844		0.115229	0.09674	0.477618
			0.142639	0.360031	0.48287		0.115341	0.0967922	0.477783
			0.142778	0.361006	0.482906		0.115454	0.0968365	0.4779
			0.142917	0.361064	0.482922		0.115566	0.0968764	0.47802
			0.143056	0.36119	0.484182		0.115678	0.0970927	0.478252
			0.143194	0.361204	0.484359		0.115791	0.0972318	0.478402
			0.143333	0.361696	0.484417		0.115903	0.0975635	0.478755
			0.143472	0.361956	0.484545		0.116015	0.0976377	0.478877
			0.143611	0.362083	0.484579		0.116128	0.0976478	0.479207
			0.14375	0.362509	0.484741		0.11624	0.0976539	0.479265
			0.143889	0.36253	0.4849		0.116352	0.0976969	0.479392
			0.144028	0.362703	0.484972		0.116465	0.0977173	0.479807
			0.144167	0.363376	0.485096		0.116577	0.0977178	0.479829
			0.144306	0.363957	0.485179		0.116689	0.0977297	0.480004
			0.144444	0.364089	0.485877		0.116801	0.097842	0.480026
			0.144583	0.364293	0.485923		0.116914	0.097971	0.480419
			0.144722	0.364317	0.48615		0.117026	0.0981694	0.480861
			0.144861	0.364702	0.486357		0.117138	0.0981858	0.481349
			0.145	0.364864	0.4866		0.117251	0.0982739	0.481359
			0.145139	0.36508	0.486608		0.117363	0.0983645	0.481398
			0.145278	0.365116	0.48703		0.117475	0.0984241	0.482123
			0.145417	0.36609	0.487135		0.117588	0.0984766	0.482391
			0.145556	0.366518	0.48717		0.1177	0.0985931	0.482494
			0.145694	0.366546	0.487273		0.117812	0.0987398	0.482567
			0.145833	0.366937	0.487839		0.117925	0.098801	0.482584
			0.145972	0.367769	0.487974		0.118037	0.0989613	0.482652
			0.146111	0.367794	0.488328		0.118149	0.0991557	0.48275
			0.14625	0.367851	0.488518		0.118261	0.099313	0.483068
			0.146389	0.368418	0.488821		0.118374	0.0995097	0.483334
			0.146528	0.368578	0.48907		0.118486	0.0995188	0.483432
			0.146667	0.369026	0.489106		0.118598	0.0995784	0.484457
			0.146806	0.369166	0.489193		0.118711	0.0997044	0.484574
			0.146944	0.370055	0.48922		0.118823	0.0997087	0.484738
			0.147083	0.370352	0.489232		0.118935	0.0997569	0.484883
			0.147222	0.370864	0.489407		0.119048	0.099823	0.485068
			0.147361	0.370868	0.489425		0.11916	0.09988	0.485307
			0.1475	0.371679	0.489458		0.119272	0.0998822	0.485396
			0.147639	0.371719	0.489654		0.119385	0.0998863	0.485523
			0.147778	0.37211	0.489944		0.119497	0.0999517	0.485542
			0.147917	0.37257	0.490203		0.119609	0.0999518	0.485761
			0.148056	0.372819	0.49058		0.119721	0.100053	0.48593
			0.148194	0.372823	0.490587		0.119834	0.100104	0.486003
			0.148333	0.373449	0.490714		0.119946	0.100231	0.486386
			0.148472	0.373692	0.490723		0.120058	0.100299	0.486386
			0.148611	0.373804	0.490732		0.120171	0.100385	0.486394
			0.14875	0.374485	0.490993		0.120283	0.100389	0.486434
			0.148889	0.374843	0.491051		0.120395	0.100567	0.486747
			0.149028	0.375072	0.491269		0.120508	0.100567	0.486836
			0.149167	0.37508	0.491277		0.12062	0.100718	0.487288
			0.149306	0.375273	0.491283		0.120732	0.100742	0.487736
			0.149444	0.375432	0.491451		0.120845	0.100758	0.487805
			0.149583	0.375786	0.49148		0.120957	0.100779	0.487988
			0.149722	0.37598	0.491501		0.121069	0.100792	0.488029
			0.149861	0.376309	0.49152		0.121181	0.100886	0.488202
			0.15	0.376324	0.491682		0.121294	0.100921	0.488638
			0.150139	0.376981	0.491727		0.121406	0.101015	0.488722
			0.150278	0.377178	0.491746		0.121518	0.101047	0.488905
			0.150417	0.377467	0.492071		0.121631	0.101048	0.48891
			0.150556	0.377572	0.492551		0.121743	0.101052	0.489005
			0.150694	0.378032	0.49267		0.121855	0.101125	0.489365
			0.150833	0.378116	0.492717		0.121968	0.101248	0.489512
			0.150972	0.37852	0.492879		0.12208	0.101556	0.489531
			0.151111	0.378926	0.49349		0.122192	0.101576	0.489626
			0.15125	0.378987	0.493703		0.122305	0.101599	0.489831
			0.151389	0.379598	0.493878		0.122417	0.101611	0.490111
			0.151528	0.379774	0.494009		0.122529	0.101651	0.490371
			0.151667	0.380409	0.494383		0.122642	0.101699	0.490878
			0.151806	0.38041	0.494663		0.122754	0.101718	0.490901
			0.151944	0.381177	0.494996		0.122866	0.10174	0.490968
			0.152083	0.381375	0.495242		0.122978	0.101769	0.491381
			0.152222	0.381622	0.495436		0.123091	0.101835	0.491416
			0.152361	0.382017	0.495711		0.123203	0.101882	0.491594
			0.1525	0.382078	0.496211		0.123315	0.102036	0.4917
			0.152639	0.382094	0.496235		0.123428	0.102048	0.492121
			0.152778	0.382262	0.496259		0.12354	0.102143	0.492513
			0.152917	0.38228	0.496319		0.123652	0.102376	0.492556
			0.153056	0.382317	0.496372		0.123765	0.102418	0.492686
			0.153194	0.38242	0.496597		0.123877	0.102445	0.49291
			0.153333	0.382682	0.496612		0.123989	0.102485	0.492946
			0.153472	0.383198	0.497382		0.124102	0.102556	0.493068
			0.153611	0.383264	0.497423		0.124214	0.102654	0.493438
			0.15375	0.383674	0.49748		0.124326	0.102663	0.49345
			0.153889	0.384371	0.497925		0.124438	0.103013	0.493506
			0.154028	0.384546	0.497963		0.124551	0.103078	0.493741
			0.154167	0.384789	0.498174		0.124663	0.103145	0.493758
			0.154306	0.384853	0.498314		0.124775	0.103205	0.493759
			0.154444	0.386198	0.498636		0.124888	0.103416	0.494094
			0.154583	0.386512	0.499271		0.125	0.103673	0.49412
			0.154722	0.386928	0.499824		0.125112	0.103783	0.494142
			0.154861	0.387081	0.499863		0.125225	0.103842	0.494171
			0.155	0.387343	0.500046		0.125337	0.103898	0.494407
			0.155139	0.387594	0.500124		0.125449	0.103966	0.494677
			0.155278	0.387811	0.500212		0.125562	0.104022	0.494759
			0.155417	0.387811	0.500666		0.125674	0.104052	0.494866
			0.155556	0.387853	0.500744		0.125786	0.104221	0.495648
			0.155694	0.388211	0.500982		0.125898	0.104254	0.495705
			0.155833	0.388255	0.501284		0.126011	0.104408	0.495788
			0.155972	0.388414	0.501565		0.126123	0.104518	0.496237
			0.156111	0.388419	0.501928		0.126235	0.104586	0.496265
			0.15625	0.388494	0.502107		0.126348	0.104616	0.496326
			0.156389	0.389654	0.502107		0.12646	0.104651	0.496662
			0.156528	0.390152	0.502147		0.126572	0.104691	0.496835
			0.156667	0.390394	0.502245		0.126685	0.104729	0.497087
			0.156806	0.390538	0.502422		0.126797	0.104869	0.497098
			0.156944	0.391453	0.502574		0.126909	0.104876	0.497192
			0.157083	0.392038	0.502794		0.127022	0.104937	0.497258
			0.157222	0.392056	0.502901		0.127134	0.104976	0.497346
			0.157361	0.392518	0.503186		0.127246	0.105006	0.497628
			0.1575	0.392821	0.503206		0.127358	0.105051	0.497661
			0.157639	0.393104	0.503366		0.127471	0.105086	0.497828
			0.157778	0.393961	0.503856		0.127583	0.105234	0.498368
			0.157917	0.394473	0.504143		0.127695	0.105317	0.498438
			0.158056	0.3949	0.504165		0.127808	0.105353	0.498562
			0.158194	0.395324	0.504213		0.12792	0.105373	0.498975
			0.158333	0.395408	0.504505		0.128032	0.105382	0.499194
			0.158472	0.395496	0.504876		0.128145	0.105409	0.499252
			0.158611	0.395503	0.504952		0.128257	0.105506	0.49973
			0.15875	0.395776	0.504969		0.128369	0.105576	0.499805
			0.158889	0.395863	0.505032		0.128482	0.105757	0.50011
			0.159028	0.395922	0.505478		0.128594	0.10586	0.500182
			0.159167	0.39602	0.505723		0.128706	0.105886	0.500266
			0.159306	0.396037	0.505961		0.128819	0.106106	0.500401
			0.159444	0.396263	0.50619		0.128931	0.10624	0.500808
			0.159583	0.396745	0.506205		0.129043	0.10635	0.500991
			0.159722	0.397021	0.506228		0.129155	0.106359	0.50111
			0.159861	0.39723	0.506257		0.129268	0.106439	0.50119
			0.16	0.39763	0.506489		0.12938	0.106547	0.501664
			0.160139	0.397762	0.507173		0.129492	0.1066	0.501806
			0.160278	0.398666	0.507309		0.129605	0.106609	0.501853
			0.160417	0.398797	0.507396		0.129717	0.106666	0.501954
			0.160556	0.398999	0.507653		0.129829	0.106785	0.502101
			0.160694	0.399019	0.508256		0.129942	0.10682	0.502282
			0.160833	0.399325	0.508376		0.130054	0.106841	0.503073
			0.160972	0.399409	0.508428		0.130166	0.106846	0.503131
			0.161111	0.399593	0.509018		0.130279	0.107126	0.503565
			0.16125	0.399757	0.5091		0.130391	0.107147	0.503713
			0.161389	0.400142	0.509178		0.130503	0.107183	0.504058
			0.161528	0.400869	0.509337		0.130615	0.10722	0.504188
			0.161667	0.400877	0.509625		0.130728	0.107245	0.504532
			0.161806	0.401123	0.509914		0.13084	0.107458	0.504672
			0.161944	0.401168	0.509935		0.130952	0.107589	0.505703
			0.162083	0.401366	0.510064		0.131065	0.107675	0.505808
			0.162222	0.401504	0.510111		0.131177	0.107711	0.505852
			0.162361	0.401583	0.510122		0.131289	0.107843	0.506008
			0.1625	0.40164	0.510253		0.131402	0.108128	0.506149
			0.162639	0.402191	0.510481		0.131514	0.108183	0.506215
			0.162778	0.402435	0.510974		0.131626	0.108353	0.506524
			0.162917	0.403177	0.511262		0.131739	0.108363	0.506529
			0.163056	0.403277	0.511297		0.131851	0.108428	0.506533
			0.163194	0.403357	0.511407		0.131963	0.108567	0.506563
			0.163333	0.403832	0.511454		0.132075	0.108637	0.506609
			0.163472	0.404177	0.511768		0.132188	0.108805	0.506805
			0.163611	0.404434	0.512123		0.1323	0.108807	0.50689
			0.16375	0.404508	0.51217		0.132412	0.108997	0.507136
			0.163889	0.404681	0.512175		0.132525	0.109124	0.507626
			0.164028	0.404719	0.512282		0.132637	0.109232	0.507708
			0.164167	0.405027	0.512469		0.132749	0.109249	0.50771
			0.164306	0.405149	0.512756		0.132862	0.109271	0.507859
			0.164444	0.405717	0.51279		0.132974	0.109277	0.508183
			0.164583	0.406065	0.513224		0.133086	0.109415	0.508382
			0.164722	0.406752	0.513412		0.133199	0.109512	0.508417
			0.164861	0.406764	0.513947		0.133311	0.109657	0.508583
			0.165	0.406773	0.514209		0.133423	0.109672	0.508957
			0.165139	0.406893	0.514551		0.133535	0.109824	0.50919
			0.165278	0.40694	0.514662		0.133648	0.11029	0.509315
			0.165417	0.407055	0.514747		0.13376	0.110308	0.509946
			0.165556	0.407538	0.514873		0.133872	0.110354	0.510171
			0.165694	0.407682	0.515075		0.133985	0.110364	0.510188
			0.165833	0.40807	0.515242		0.134097	0.110434	0.510487
			0.165972	0.408082	0.515453		0.134209	0.110448	0.510519
			0.166111	0.408359	0.515582		0.134322	0.110514	0.510633
			0.16625	0.408644	0.5162		0.134434	0.110535	0.510737
			0.166389	0.408697	0.516265		0.134546	0.110565	0.5111
			0.166528	0.408898	0.51633		0.134659	0.110644	0.511134
			0.166667	0.409069	0.51637		0.134771	0.1107	0.511705
			0.166806	0.409243	0.516529		0.134883	0.110775	0.511767
			0.166944	0.410316	0.516885		0.134996	0.110811	0.511823
			0.167083	0.410354	0.517078		0.135108	0.111007	0.511898
			0.167222	0.411074	0.517201		0.13522	0.111019	0.512042
			0.167361	0.411581	0.5176		0.135332	0.111344	0.512146
			0.1675	0.411881	0.517608		0.135445	0.111371	0.512179
			0.167639	0.412602	0.517899		0.135557	0.111401	0.512239
			0.167778	0.412743	0.517983		0.135669	0.11143	0.512575
			0.167917	0.412979	0.518419		0.135782	0.111544	0.512627
			0.168056	0.413824	0.518482		0.135894	0.111591	0.51342
			0.168194	0.414132	0.518555		0.136006	0.111596	0.513553
			0.168333	0.414589	0.518898		0.136119	0.111608	0.513608
			0.168472	0.414612	0.519011		0.136231	0.111666	0.514224
			0.168611	0.41463	0.519412		0.136343	0.111738	0.514255
			0.16875	0.414645	0.519423		0.136456	0.111769	0.515097
			0.168889	0.414672	0.519615		0.136568	0.111954	0.515698
			0.169028	0.414853	0.519804		0.13668	0.112041	0.515865
			0.169167	0.415227	0.519875		0.136792	0.112118	0.516057
			0.169306	0.415295	0.519907		0.136905	0.112355	0.516159
			0.169444	0.416104	0.520143		0.137017	0.112404	0.516497
			0.169583	0.416324	0.520375		0.137129	0.112457	0.516738
			0.169722	0.416345	0.520648		0.137242	0.112519	0.51674
			0.169861	0.416406	0.520727		0.137354	0.112744	0.5168
			0.17	0.41666	0.521158		0.137466	0.112748	0.51703
			0.170139	0.417019	0.521314		0.137579	0.112767	0.517168
			0.170278	0.417342	0.521324		0.137691	0.112904	0.517672
			0.170417	0.417491	0.52141		0.137803	0.112904	0.517844
			0.170556	0.417604	0.52157		0.137916	0.112913	0.518164
			0.170694	0.417682	0.521832		0.138028	0.112934	0.518349
			0.170833	0.418354	0.522004		0.13814	0.113012	0.518372
			0.170972	0.418438	0.522029		0.138252	0.113055	0.518542
			0.171111	0.418942	0.522101		0.138365	0.113066	0.518581
			0.17125	0.419015	0.52225		0.138477	0.113129	0.51859
			0.171389	0.419206	0.522413		0.138589	0.113148	0.519
			0.171528	0.419814	0.522781		0.138702	0.113196	0.519071
			0.171667	0.419939	0.522964		0.138814	0.113292	0.519111
			0.171806	0.420176	0.523228		0.138926	0.113346	0.519141
			0.171944	0.420702	0.523446		0.139039	0.113348	0.519226
			0.172083	0.420859	0.523705		0.139151	0.113433	0.519433
			0.172222	0.420903	0.523951		0.139263	0.113469	0.51944
			0.172361	0.420911	0.524153		0.139376	0.113588	0.519452
			0.1725	0.421329	0.524283		0.139488	0.113865	0.519522
			0.172639	0.421395	0.524473		0.1396	0.114034	0.519795
			0.172778	0.421452	0.524598		0.139712	0.114086	0.519914
			0.172917	0.421725	0.524643		0.139825	0.114098	0.520312
			0.173056	0.422571	0.525216		0.139937	0.114137	0.52045
			0.173194	0.422599	0.525365		0.140049	0.11425	0.520479
			0.173333	0.422674	0.525878		0.140162	0.114262	0.520507
			0.173472	0.422749	0.526009		0.140274	0.114309	0.520592
			0.173611	0.422864	0.526545		0.140386	0.114497	0.520673
			0.17375	0.422875	0.526626		0.140499	0.114503	0.52118
			0.173889	0.423121	0.526754		0.140611	0.114607	0.521354
			0.174028	0.423168	0.526772		0.140723	0.114693	0.521483
			0.174167	0.42323	0.52683		0.140836	0.114756	0.521729
			0.174306	0.423769	0.527189		0.140948	0.114771	0.521891
			0.174444	0.424143	0.527491		0.14106	0.114871	0.521924
			0.174583	0.424173	0.527952		0.141173	0.11497	0.521977
			0.174722	0.424732	0.527989		0.141285	0.115073	0.522341
			0.174861	0.424929	0.52801		0.141397	0.115108	0.522368
			0.175	0.425958	0.528161		0.141509	0.115164	0.522564
			0.175139	0.426358	0.528177		0.141622	0.115265	0.522847
			0.175278	0.426549	0.529025		0.141734	0.115334	0.523006
			0.175417	0.42675	0.529254		0.141846	0.115459	0.523055
			0.175556	0.426978	0.529638		0.141959	0.115584	0.523156
			0.175694	0.426978	0.530026		0.142071	0.115642	0.523431
			0.175833	0.427018	0.53003		0.142183	0.115696	0.5237
			0.175972	0.427099	0.530043		0.142296	0.115714	0.523728
			0.176111	0.427667	0.530474		0.142408	0.115729	0.52375
			0.17625	0.427842	0.530542		0.14252	0.115746	0.523878
			0.176389	0.427937	0.530677		0.142633	0.115756	0.523895
			0.176528	0.428033	0.530795		0.142745	0.115854	0.524161
			0.176667	0.428118	0.531036		0.142857	0.115856	0.524237
			0.176806	0.428183	0.53117		0.142969	0.115973	0.52427
			0.176944	0.428565	0.531509		0.143082	0.116044	0.524744
			0.177083	0.428759	0.53178		0.143194	0.116047	0.524901
			0.177222	0.428878	0.531807		0.143306	0.116202	0.525167
			0.177361	0.428895	0.531985		0.143419	0.116341	0.525192
			0.1775	0.428951	0.532032		0.143531	0.116371	0.525196
			0.177639	0.429074	0.532087		0.143643	0.116385	0.52534
			0.177778	0.429153	0.532486		0.143756	0.116416	0.52536
			0.177917	0.430575	0.532843		0.143868	0.116578	0.52543
			0.178056	0.430609	0.532876		0.14398	0.116618	0.525966
			0.178194	0.430967	0.533064		0.144093	0.116682	0.52606
			0.178333	0.431017	0.533097		0.144205	0.116729	0.526122
			0.178472	0.431062	0.53325		0.144317	0.116762	0.526162
			0.178611	0.431389	0.533628		0.144429	0.116827	0.527061
			0.17875	0.431494	0.534003		0.144542	0.116857	0.527152
			0.178889	0.431571	0.534517		0.144654	0.116891	0.527168
			0.179028	0.431807	0.534535		0.144766	0.117017	0.527174
			0.179167	0.432147	0.534586		0.144879	0.117092	0.527224
			0.179306	0.432498	0.534793		0.144991	0.117306	0.527339
			0.179444	0.432871	0.535006		0.145103	0.117364	0.527488
			0.179583	0.433258	0.53522		0.145216	0.117422	0.527546
			0.179722	0.43361	0.53525		0.145328	0.117522	0.528039
			0.179861	0.433776	0.535312		0.14544	0.117594	0.528276
			0.18	0.433988	0.535594		0.145553	0.117679	0.528348
			0.180139	0.434412	0.535651		0.145665	0.117707	0.528393
			0.180278	0.434491	0.535786		0.145777	0.117743	0.528444
			0.180417	0.434495	0.535867		0.145889	0.117892	0.528715
			0.180556	0.434707	0.535977		0.146002	0.117918	0.52898
			0.180694	0.434899	0.536302		0.146114	0.117954	0.529149
			0.180833	0.435148	0.536353		0.146226	0.11799	0.529166
			0.180972	0.435721	0.536388		0.146339	0.118006	0.529437
			0.181111	0.435772	0.536775		0.146451	0.11807	0.529502
			0.18125	0.436709	0.536781		0.146563	0.118229	0.52955
			0.181389	0.437353	0.536913		0.146676	0.118236	0.529555
			0.181528	0.437436	0.537014		0.146788	0.118417	0.52956
			0.181667	0.437539	0.537284		0.1469	0.118491	0.529573
			0.181806	0.437785	0.537322		0.147013	0.118492	0.529581
			0.181944	0.437787	0.537483		0.147125	0.11862	0.529873
			0.182083	0.437902	0.537728		0.147237	0.118671	0.531181
			0.182222	0.437907	0.537762		0.14735	0.118686	0.531402
			0.182361	0.438103	0.537956		0.147462	0.118745	0.531424
			0.1825	0.438193	0.538289		0.147574	0.118755	0.531595
			0.182639	0.438552	0.538337		0.147686	0.118761	0.531673
			0.182778	0.439044	0.538365		0.147799	0.118815	0.5318
			0.182917	0.439456	0.538409		0.147911	0.118825	0.531801
			0.183056	0.439694	0.538412		0.148023	0.118829	0.532089
			0.183194	0.44022	0.538497		0.148136	0.118908	0.532164
			0.183333	0.440296	0.53887		0.148248	0.118981	0.532337
			0.183472	0.440959	0.539017		0.14836	0.118982	0.532352
			0.183611	0.441219	0.539157		0.148473	0.119039	0.532513
			0.18375	0.441544	0.53927		0.148585	0.119104	0.532523
			0.183889	0.441786	0.539442		0.148697	0.119114	0.532564
			0.184028	0.441862	0.540062		0.14881	0.11937	0.533058
			0.184167	0.443001	0.540138		0.148922	0.119608	0.533118
			0.184306	0.443139	0.540266		0.149034	0.119639	0.533804
			0.184444	0.443379	0.540316		0.149146	0.1198	0.533816
			0.184583	0.443431	0.540417		0.149259	0.119968	0.533864
			0.184722	0.443701	0.540419		0.149371	0.120116	0.534076
			0.184861	0.443745	0.540671		0.149483	0.120142	0.534121
			0.185	0.444733	0.540709		0.149596	0.120163	0.534259
			0.185139	0.444793	0.540811		0.149708	0.120215	0.534582
			0.185278	0.444872	0.540923		0.14982	0.120227	0.534788
			0.185417	0.445239	0.540978		0.149933	0.120336	0.534985
			0.185556	0.445498	0.5412		0.150045	0.120344	0.535164
			0.185694	0.446065	0.541292		0.150157	0.120348	0.535166
			0.185833	0.446459	0.541434		0.15027	0.120497	0.535186
			0.185972	0.446483	0.541629		0.150382	0.120546	0.535683
			0.186111	0.446586	0.541648		0.150494	0.120665	0.535688
			0.18625	0.447127	0.541891		0.150606	0.120689	0.535748
			0.186389	0.447483	0.542175		0.150719	0.120702	0.535772
			0.186528	0.447502	0.542311		0.150831	0.120708	0.535829
			0.186667	0.447585	0.542392		0.150943	0.120755	0.535839
			0.186806	0.448032	0.542399		0.151056	0.120801	0.536315
			0.186944	0.448051	0.542681		0.151168	0.120801	0.53676
			0.187083	0.448177	0.543295		0.15128	0.121068	0.537021
			0.187222	0.448317	0.543378		0.151393	0.121116	0.537093
			0.187361	0.448702	0.543585		0.151505	0.121135	0.537118
			0.1875	0.449073	0.543602		0.151617	0.121273	0.537362
			0.187639	0.449098	0.543685		0.15173	0.1213	0.537591
			0.187778	0.44944	0.543705		0.151842	0.121301	0.537702
			0.187917	0.450161	0.543749		0.151954	0.121365	0.538093
			0.188056	0.450364	0.543848		0.152066	0.12181	0.538225
			0.188194	0.450624	0.544199		0.152179	0.121852	0.538843
			0.188333	0.450676	0.544552		0.152291	0.121897	0.538893
			0.188472	0.45088	0.544925		0.152403	0.122014	0.539075
			0.188611	0.451084	0.544968		0.152516	0.122081	0.53908
			0.18875	0.451483	0.54513		0.152628	0.122425	0.539237
			0.188889	0.451585	0.54559		0.15274	0.122649	0.539526
			0.189028	0.452149	0.545686		0.152853	0.122686	0.53956
			0.189167	0.452314	0.546107		0.152965	0.12275	0.539686
			0.189306	0.452524	0.546131		0.153077	0.122786	0.539762
			0.189444	0.453094	0.546271		0.15319	0.122955	0.539764
			0.189583	0.453255	0.54634		0.153302	0.12301	0.539832
			0.189722	0.453332	0.546497		0.153414	0.123026	0.540068
			0.189861	0.453449	0.546798		0.153527	0.123066	0.540141
			0.19	0.453518	0.546824		0.153639	0.123094	0.540548
			0.190139	0.453941	0.547131		0.153751	0.123165	0.540652
			0.190278	0.454215	0.547328		0.153863	0.123196	0.540767
			0.190417	0.454867	0.547475		0.153976	0.123275	0.540808
			0.190556	0.454879	0.547652		0.154088	0.123372	0.541273
			0.190694	0.454948	0.547713		0.1542	0.123381	0.541295
			0.190833	0.455731	0.547801		0.154313	0.123397	0.541428
			0.190972	0.455759	0.547813		0.154425	0.123443	0.54186
			0.191111	0.455778	0.547993		0.154537	0.123444	0.541872
			0.19125	0.456115	0.54807		0.15465	0.123493	0.542222
			0.191389	0.45667	0.548235		0.154762	0.123593	0.542792
			0.191528	0.456863	0.548421		0.154874	0.123696	0.542891
			0.191667	0.457176	0.548489		0.154987	0.12381	0.542961
			0.191806	0.457754	0.548501		0.155099	0.123857	0.543067
			0.191944	0.457916	0.548579		0.155211	0.123861	0.543111
			0.192083	0.45812	0.548592		0.155323	0.123905	0.543117
			0.192222	0.458364	0.548641		0.155436	0.123969	0.543524
			0.192361	0.458589	0.548934		0.155548	0.124157	0.543576
			0.1925	0.45865	0.549387		0.15566	0.124217	0.543577
			0.192639	0.45872	0.54955		0.155773	0.12424	0.543605
			0.192778	0.458898	0.549905		0.155885	0.124279	0.543721
			0.192917	0.459371	0.550212		0.155997	0.124312	0.543878
			0.193056	0.45952	0.550239		0.15611	0.124337	0.544114
			0.193194	0.459575	0.550311		0.156222	0.124444	0.544309
			0.193333	0.459604	0.550317		0.156334	0.124464	0.544314
			0.193472	0.459607	0.550363		0.156447	0.124511	0.544317
			0.193611	0.459693	0.550539		0.156559	0.124548	0.54444
			0.19375	0.459745	0.550565		0.156671	0.124643	0.544573
			0.193889	0.459811	0.55064		0.156783	0.12488	0.544614
			0.194028	0.460592	0.551228		0.156896	0.124991	0.544679
			0.194167	0.460807	0.551575		0.157008	0.124994	0.54477
			0.194306	0.461411	0.551863		0.15712	0.125321	0.54496
			0.194444	0.461976	0.551997		0.157233	0.125327	0.545287
			0.194583	0.46208	0.552205		0.157345	0.125342	0.545298
			0.194722	0.462371	0.552336		0.157457	0.125359	0.545449
			0.194861	0.463157	0.552445		0.15757	0.125402	0.545638
			0.195	0.463195	0.552669		0.157682	0.125656	0.545852
			0.195139	0.463684	0.552754		0.157794	0.125659	0.545914
			0.195278	0.463893	0.552784		0.157907	0.125696	0.545978
			0.195417	0.464076	0.552881		0.158019	0.125791	0.546492
			0.195556	0.464113	0.552927		0.158131	0.125854	0.546653
			0.195694	0.464507	0.552943		0.158243	0.126095	0.546832
			0.195833	0.464681	0.553058		0.158356	0.126111	0.546969
			0.195972	0.46487	0.553087		0.158468	0.126118	0.547301
			0.196111	0.464872	0.553415		0.15858	0.126139	0.547327
			0.19625	0.464953	0.553561		0.158693	0.126178	0.547367
			0.196389	0.46517	0.553574		0.158805	0.126184	0.547455
			0.196528	0.465429	0.553888		0.158917	0.126252	0.547534
			0.196667	0.465703	0.554165		0.15903	0.126566	0.547622
			0.196806	0.465729	0.554532		0.159142	0.126646	0.547842
			0.196944	0.465824	0.554855		0.159254	0.126677	0.547915
			0.197083	0.46665	0.555228		0.159367	0.127117	0.547974
			0.197222	0.466671	0.555236		0.159479	0.127224	0.547977
			0.197361	0.467039	0.555517		0.159591	0.127236	0.547986
			0.1975	0.46734	0.555646		0.159704	0.127379	0.548293
			0.197639	0.467614	0.555659		0.159816	0.127392	0.548312
			0.197778	0.467619	0.555904		0.159928	0.127434	0.548423
			0.197917	0.467861	0.556007		0.16004	0.127506	0.548468
			0.198056	0.467965	0.556594		0.160153	0.127602	0.548469
			0.198194	0.468234	0.556675		0.160265	0.12763	0.54852
			0.198333	0.468522	0.556753		0.160377	0.127653	0.548549
			0.198472	0.468928	0.556916		0.16049	0.127656	0.548556
			0.198611	0.468942	0.557076		0.160602	0.127669	0.548567
			0.19875	0.46896	0.557631		0.160714	0.127714	0.548712
			0.198889	0.469049	0.557825		0.160827	0.127732	0.548737
			0.199028	0.469177	0.557852		0.160939	0.127739	0.548791
			0.199167	0.469319	0.558038		0.161051	0.127761	0.54912
			0.199306	0.469387	0.558097		0.161164	0.12778	0.549261
			0.199444	0.469465	0.558228		0.161276	0.127794	0.549551
			0.199583	0.469878	0.558351		0.161388	0.127821	0.549771
			0.199722	0.470272	0.558475		0.1615	0.127838	0.549846
			0.199861	0.470347	0.558531		0.161613	0.127863	0.549942
			0.2	0.470453	0.558531		0.161725	0.127904	0.550245
			0.200139	0.470758	0.558598		0.161837	0.127955	0.550292
			0.200278	0.471033	0.558642		0.16195	0.128035	0.550314
			0.200417	0.471126	0.558891		0.162062	0.128044	0.550434
			0.200556	0.471428	0.559031		0.162174	0.128045	0.551048
			0.200694	0.471564	0.559368		0.162287	0.128047	0.551174
			0.200833	0.471718	0.559594		0.162399	0.128129	0.55152
			0.200972	0.471968	0.559725		0.162511	0.128202	0.551635
			0.201111	0.471998	0.55974		0.162624	0.128202	0.551663
			0.20125	0.472159	0.559823		0.162736	0.128255	0.551748
			0.201389	0.472257	0.559903		0.162848	0.12844	0.551918
			0.201528	0.472547	0.560297		0.16296	0.128538	0.552217
			0.201667	0.47281	0.560379		0.163073	0.128604	0.552288
			0.201806	0.47319	0.560784		0.163185	0.128616	0.552482
			0.201944	0.473195	0.560824		0.163297	0.128622	0.55254
			0.202083	0.473239	0.560924		0.16341	0.128719	0.552764
			0.202222	0.473264	0.561018		0.163522	0.128763	0.552955
			0.202361	0.473385	0.561238		0.163634	0.128801	0.553311
			0.2025	0.473422	0.561577		0.163747	0.12888	0.553312
			0.202639	0.473484	0.561795		0.163859	0.128887	0.553338
			0.202778	0.473987	0.561807		0.163971	0.128893	0.553339
			0.202917	0.474124	0.562193		0.164084	0.128969	0.553433
			0.203056	0.474665	0.562433		0.164196	0.129112	0.553515
			0.203194	0.474726	0.562613		0.164308	0.129334	0.553609
			0.203333	0.475602	0.562649		0.16442	0.129365	0.553616
			0.203472	0.475628	0.562925		0.164533	0.129443	0.553634
			0.203611	0.475668	0.563002		0.164645	0.129614	0.553858
			0.20375	0.475696	0.56315		0.164757	0.129619	0.554001
			0.203889	0.475783	0.563371		0.16487	0.129627	0.554239
			0.204028	0.476414	0.563699		0.164982	0.129676	0.554243
			0.204167	0.476426	0.564328		0.165094	0.129803	0.554257
			0.204306	0.476548	0.564348		0.165207	0.129888	0.554357
			0.204444	0.476814	0.564777		0.165319	0.129936	0.554477
			0.204583	0.477294	0.565033		0.165431	0.129981	0.554884
			0.204722	0.477726	0.565054		0.165544	0.130112	0.554933
			0.204861	0.477789	0.565429		0.165656	0.130242	0.554961
			0.205	0.477875	0.565659		0.165768	0.130301	0.555249
			0.205139	0.478374	0.565868		0.165881	0.130397	0.555558
			0.205278	0.478517	0.566209		0.165993	0.130398	0.55601
			0.205417	0.478961	0.566398		0.166105	0.130461	0.556166
			0.205556	0.478999	0.566509		0.166217	0.130524	0.556249
			0.205694	0.479013	0.566752		0.16633	0.130534	0.556347
			0.205833	0.479681	0.566802		0.166442	0.130694	0.556376
			0.205972	0.479785	0.566847		0.166554	0.130807	0.5564
			0.206111	0.479903	0.567366		0.166667	0.130809	0.556412
			0.20625	0.480418	0.567992		0.166779	0.130863	0.556477
			0.206389	0.481331	0.568347		0.166891	0.130904	0.556494
			0.206528	0.482181	0.568565		0.167004	0.130965	0.556682
			0.206667	0.482301	0.568834		0.167116	0.130974	0.557009
			0.206806	0.482529	0.569336		0.167228	0.130992	0.557185
			0.206944	0.482616	0.569378		0.167341	0.13105	0.557203
			0.207083	0.482619	0.569501		0.167453	0.13106	0.557316
			0.207222	0.482637	0.569676		0.167565	0.131087	0.557355
			0.207361	0.482646	0.569701		0.167677	0.131228	0.557409
			0.2075	0.482691	0.570171		0.16779	0.13126	0.557441
			0.207639	0.482746	0.570268		0.167902	0.131273	0.557653
			0.207778	0.482958	0.570286		0.168014	0.131345	0.557696
			0.207917	0.482958	0.570763		0.168127	0.131404	0.55772
			0.208056	0.483069	0.571003		0.168239	0.131508	0.557767
			0.208194	0.483396	0.571026		0.168351	0.131512	0.557823
			0.208333	0.483398	0.571244		0.168464	0.13155	0.558112
			0.208472	0.483406	0.571358		0.168576	0.131599	0.558216
			0.208611	0.483539	0.571465		0.168688	0.13166	0.558368
			0.20875	0.483546	0.571489		0.168801	0.131675	0.558585
			0.208889	0.483548	0.571596		0.168913	0.131706	0.558602
			0.209028	0.483603	0.571659		0.169025	0.131881	0.559288
			0.209167	0.483661	0.571838		0.169137	0.131896	0.559508
			0.209306	0.484212	0.572083		0.16925	0.131917	0.55969
			0.209444	0.484277	0.572084		0.169362	0.131942	0.55972
			0.209583	0.484689	0.572127		0.169474	0.131964	0.559833
			0.209722	0.484689	0.572571		0.169587	0.131983	0.560172
			0.209861	0.484868	0.572577		0.169699	0.131996	0.560566
			0.21	0.485349	0.572765		0.169811	0.132094	0.560656
			0.210139	0.486219	0.572977		0.169924	0.132212	0.56069
			0.210278	0.48633	0.573346		0.170036	0.132262	0.560738
			0.210417	0.486589	0.573674		0.170148	0.132274	0.560824
			0.210556	0.487324	0.574063		0.170261	0.132323	0.560829
			0.210694	0.487432	0.574458		0.170373	0.132498	0.560989
			0.210833	0.487475	0.574533		0.170485	0.132552	0.561222
			0.210972	0.488132	0.574568		0.170597	0.132726	0.561363
			0.211111	0.488285	0.574665		0.17071	0.132892	0.561509
			0.21125	0.488737	0.574898		0.170822	0.132898	0.561552
			0.211389	0.488874	0.574925		0.170934	0.133087	0.561641
			0.211528	0.489142	0.575024		0.171047	0.133088	0.56175
			0.211667	0.489452	0.575108		0.171159	0.133099	0.562106
			0.211806	0.489495	0.575363		0.171271	0.133118	0.562288
			0.211944	0.489566	0.575569		0.171384	0.133137	0.562482
			0.212083	0.489687	0.576194		0.171496	0.133241	0.562572
			0.212222	0.490276	0.576684		0.171608	0.133269	0.562614
			0.212361	0.49028	0.576702		0.171721	0.133402	0.562891
			0.2125	0.490478	0.5771		0.171833	0.133469	0.563135
			0.212639	0.490499	0.577337		0.171945	0.133506	0.563165
			0.212778	0.490783	0.57759		0.172058	0.133558	0.563403
			0.212917	0.491534	0.578057		0.17217	0.133612	0.563823
			0.213056	0.491614	0.578151		0.172282	0.133633	0.563926
			0.213194	0.491701	0.578213		0.172394	0.133633	0.563958
			0.213333	0.491741	0.578265		0.172507	0.133647	0.564194
			0.213472	0.491779	0.578834		0.172619	0.133736	0.56433
			0.213611	0.491846	0.579018		0.172731	0.133771	0.564351
			0.21375	0.492105	0.579044		0.172844	0.13382	0.564371
			0.213889	0.492162	0.57938		0.172956	0.133893	0.564548
			0.214028	0.492271	0.579596		0.173068	0.13397	0.564565
			0.214167	0.49273	0.579768		0.173181	0.134044	0.564762
			0.214306	0.492885	0.580012		0.173293	0.134095	0.564801
			0.214444	0.492936	0.580294		0.173405	0.134218	0.565274
			0.214583	0.49316	0.580503		0.173518	0.13424	0.565413
			0.214722	0.493442	0.580537		0.17363	0.134261	0.565463
			0.214861	0.493533	0.580634		0.173742	0.134277	0.565479
			0.215	0.493562	0.581079		0.173854	0.13429	0.56555
			0.215139	0.493633	0.581235		0.173967	0.134291	0.565867
			0.215278	0.494407	0.581442		0.174079	0.134335	0.566798
			0.215417	0.494425	0.581764		0.174191	0.134355	0.566799
			0.215556	0.494457	0.581779		0.174304	0.134372	0.566818
			0.215694	0.494652	0.581858		0.174416	0.134456	0.567317
			0.215833	0.49483	0.582015		0.174528	0.134513	0.567524
			0.215972	0.494845	0.582015		0.174641	0.134576	0.567583
			0.216111	0.495581	0.5822		0.174753	0.134577	0.567658
			0.21625	0.495774	0.582372		0.174865	0.134618	0.568013
			0.216389	0.495836	0.582484		0.174978	0.13463	0.568089
			0.216528	0.495876	0.582755		0.17509	0.13471	0.56809
			0.216667	0.49599	0.582981		0.175202	0.134826	0.568105
			0.216806	0.496098	0.583207		0.175314	0.134879	0.568267
			0.216944	0.496353	0.583343		0.175427	0.134932	0.56831
			0.217083	0.496834	0.583378		0.175539	0.134999	0.568356
			0.217222	0.497875	0.583482		0.175651	0.135084	0.568368
			0.217361	0.498062	0.583486		0.175764	0.135195	0.568582
			0.2175	0.498566	0.584298		0.175876	0.135311	0.568635
			0.217639	0.498591	0.584649		0.175988	0.135506	0.56881
			0.217778	0.498592	0.584848		0.176101	0.13553	0.568817
			0.217917	0.498684	0.585021		0.176213	0.13557	0.568995
			0.218056	0.498733	0.585022		0.176325	0.135618	0.569457
			0.218194	0.498917	0.585505		0.176438	0.135713	0.569692
			0.218333	0.498958	0.585563		0.17655	0.135978	0.569708
			0.218472	0.49898	0.585577		0.176662	0.136118	0.569912
			0.218611	0.499058	0.585756		0.176774	0.136129	0.569995
			0.21875	0.499071	0.586252		0.176887	0.136168	0.57032
			0.218889	0.499377	0.58633		0.176999	0.136211	0.570502
			0.219028	0.499478	0.586569		0.177111	0.136225	0.570755
			0.219167	0.499708	0.586589		0.177224	0.136225	0.570844
			0.219306	0.49977	0.586607		0.177336	0.136338	0.570867
			0.219444	0.499841	0.586788		0.177448	0.136361	0.570957
			0.219583	0.50003	0.587097		0.177561	0.136396	0.570977
			0.219722	0.500339	0.587172		0.177673	0.136399	0.571278
			0.219861	0.500398	0.587378		0.177785	0.136413	0.571863
			0.22	0.500624	0.587547		0.177898	0.136484	0.571912
			0.220139	0.500643	0.587927		0.17801	0.13656	0.571966
			0.220278	0.501588	0.588276		0.178122	0.136585	0.572015
			0.220417	0.501791	0.588413		0.178235	0.136669	0.572084
			0.220556	0.502233	0.588788		0.178347	0.13671	0.572121
			0.220694	0.502343	0.588939		0.178459	0.136729	0.572178
			0.220833	0.502574	0.589418		0.178571	0.136753	0.572449
			0.220972	0.502907	0.589688		0.178684	0.136759	0.572672
			0.221111	0.5033	0.589745		0.178796	0.136778	0.572709
			0.22125	0.503422	0.589799		0.178908	0.136866	0.57301
			0.221389	0.503607	0.589894		0.179021	0.136941	0.573112
			0.221528	0.503852	0.589976		0.179133	0.137148	0.57314
			0.221667	0.503898	0.590192		0.179245	0.137283	0.573189
			0.221806	0.50442	0.590465		0.179358	0.137319	0.573541
			0.221944	0.504653	0.590756		0.17947	0.137376	0.574141
			0.222083	0.504762	0.591175		0.179582	0.137416	0.574505
			0.222222	0.505003	0.591515		0.179695	0.137417	0.57482
			0.222361	0.505099	0.591548		0.179807	0.137504	0.575295
			0.2225	0.505129	0.591662		0.179919	0.137529	0.575426
			0.222639	0.505481	0.591896		0.180031	0.137585	0.575686
			0.222778	0.505545	0.59208		0.180144	0.137786	0.575746
			0.222917	0.505658	0.592105		0.180256	0.137881	0.57575
			0.223056	0.506016	0.592326		0.180368	0.137929	0.575854
			0.223194	0.506142	0.592711		0.180481	0.137964	0.575867
			0.223333	0.506202	0.592737		0.180593	0.138043	0.576087
			0.223472	0.506449	0.593276		0.180705	0.138054	0.576189
			0.223611	0.506454	0.593378		0.180818	0.138139	0.576247
			0.22375	0.506457	0.593469		0.18093	0.138212	0.576388
			0.223889	0.507126	0.593591		0.181042	0.138294	0.576596
			0.224028	0.507487	0.593628		0.181155	0.138329	0.576688
			0.224167	0.507572	0.593896		0.181267	0.138336	0.577062
			0.224306	0.507641	0.593984		0.181379	0.138593	0.577076
			0.224444	0.508136	0.594087		0.181491	0.138674	0.577617
			0.224583	0.508243	0.59446		0.181604	0.13871	0.577704
			0.224722	0.508486	0.594668		0.181716	0.138757	0.57773
			0.224861	0.508872	0.594816		0.181828	0.138771	0.577752
			0.225	0.50888	0.595148		0.181941	0.138788	0.577852
			0.225139	0.508973	0.59518		0.182053	0.138817	0.578036
			0.225278	0.509076	0.595182		0.182165	0.138822	0.578414
			0.225417	0.509126	0.595186		0.182278	0.138882	0.578745
			0.225556	0.509433	0.595273		0.18239	0.138929	0.578807
			0.225694	0.509452	0.59529		0.182502	0.139036	0.579023
			0.225833	0.509769	0.596025		0.182615	0.139039	0.579068
			0.225972	0.509806	0.596092		0.182727	0.139076	0.57923
			0.226111	0.510237	0.596317		0.182839	0.1391	0.579249
			0.22625	0.51029	0.596353		0.182951	0.139111	0.579722
			0.226389	0.510342	0.596353		0.183064	0.13912	0.57977
			0.226528	0.510372	0.597372		0.183176	0.139123	0.57995
			0.226667	0.510919	0.59752		0.183288	0.139127	0.580437
			0.226806	0.511113	0.59759		0.183401	0.139193	0.580576
			0.226944	0.511641	0.5981		0.183513	0.13935	0.581018
			0.227083	0.511849	0.598212		0.183625	0.139392	0.581151
			0.227222	0.511932	0.598273		0.183738	0.139492	0.581242
			0.227361	0.512222	0.598582		0.18385	0.139496	0.581406
			0.2275	0.512425	0.598704		0.183962	0.139572	0.581473
			0.227639	0.512991	0.598791		0.184075	0.139596	0.581588
			0.227778	0.513148	0.59895		0.184187	0.139652	0.581723
			0.227917	0.513266	0.59914		0.184299	0.139712	0.581734
			0.228056	0.513295	0.599371		0.184412	0.139751	0.581762
			0.228194	0.513608	0.599405		0.184524	0.13986	0.581972
			0.228333	0.513691	0.59956		0.184636	0.140065	0.582184
			0.228472	0.513742	0.599829		0.184748	0.140066	0.582208
			0.228611	0.514067	0.599992		0.184861	0.14011	0.582283
			0.22875	0.514155	0.600116		0.184973	0.140175	0.582294
			0.228889	0.51465	0.60036		0.185085	0.140175	0.58264
			0.229028	0.514767	0.60037		0.185198	0.140182	0.582647
			0.229167	0.51495	0.600446		0.18531	0.140293	0.582827
			0.229306	0.514999	0.601019		0.185422	0.14034	0.58293
			0.229444	0.515539	0.601356		0.185535	0.140341	0.583253
			0.229583	0.516321	0.601398		0.185647	0.140375	0.583259
			0.229722	0.516357	0.601617		0.185759	0.140451	0.583264
			0.229861	0.516793	0.601628		0.185872	0.140555	0.583543
			0.23	0.517453	0.601689		0.185984	0.140574	0.583607
			0.230139	0.518119	0.601869		0.186096	0.140626	0.583796
			0.230278	0.518156	0.602012		0.186208	0.14067	0.584116
			0.230417	0.518872	0.602128		0.186321	0.140702	0.584158
			0.230556	0.519271	0.602549		0.186433	0.140747	0.584191
			0.230694	0.520017	0.602718		0.186545	0.140755	0.584268
			0.230833	0.52065	0.603332		0.186658	0.14082	0.584331
			0.230972	0.520733	0.603364		0.18677	0.140821	0.58447
			0.231111	0.520959	0.60355		0.186882	0.140847	0.58475
			0.23125	0.521722	0.603603		0.186995	0.140853	0.584925
			0.231389	0.522238	0.603742		0.187107	0.141	0.584976
			0.231528	0.522258	0.603965		0.187219	0.1411	0.584978
			0.231667	0.522283	0.6042		0.187332	0.1411	0.585
			0.231806	0.522313	0.604431		0.187444	0.141139	0.585428
			0.231944	0.522515	0.604576		0.187556	0.141147	0.585535
			0.232083	0.522847	0.604627		0.187668	0.141287	0.585691
			0.232222	0.523505	0.60473		0.187781	0.141366	0.585908
			0.232361	0.523764	0.604787		0.187893	0.141587	0.585988
			0.2325	0.523796	0.605092		0.188005	0.141643	0.58606
			0.232639	0.524259	0.605248		0.188118	0.141658	0.586119
			0.232778	0.524518	0.605398		0.18823	0.141708	0.586125
			0.232917	0.524788	0.605426		0.188342	0.141747	0.586476
			0.233056	0.524918	0.605502		0.188455	0.141811	0.586504
			0.233194	0.525346	0.605699		0.188567	0.141846	0.586834
			0.233333	0.525581	0.606159		0.188679	0.141908	0.586906
			0.233472	0.525594	0.606501		0.188792	0.141943	0.586946
			0.233611	0.525627	0.606546		0.188904	0.141946	0.587054
			0.23375	0.525655	0.607152		0.189016	0.142058	0.587072
			0.233889	0.525717	0.607225		0.189128	0.14206	0.587209
			0.234028	0.526066	0.607627		0.189241	0.142113	0.587291
			0.234167	0.526184	0.60763		0.189353	0.14228	0.587837
			0.234306	0.526653	0.607639		0.189465	0.142425	0.588024
			0.234444	0.526699	0.607853		0.189578	0.142498	0.588068
			0.234583	0.527177	0.608082		0.18969	0.142546	0.588482
			0.234722	0.52723	0.608284		0.189802	0.14262	0.588753
			0.234861	0.52746	0.608404		0.189915	0.142743	0.58913
			0.235	0.527489	0.608537		0.190027	0.142753	0.589136
			0.235139	0.527713	0.608581		0.190139	0.142922	0.589241
			0.235278	0.527811	0.608674		0.190252	0.14294	0.58929
			0.235417	0.527985	0.609027		0.190364	0.142944	0.589529
			0.235556	0.528134	0.609106		0.190476	0.143013	0.589549
			0.235694	0.528556	0.609367		0.190588	0.143032	0.589745
			0.235833	0.528576	0.609426		0.190701	0.143177	0.590018
			0.235972	0.528805	0.609689		0.190813	0.143258	0.590499
			0.236111	0.529125	0.60984		0.190925	0.14345	0.590507
			0.23625	0.529427	0.610041		0.191038	0.143545	0.590583
			0.236389	0.529803	0.610107		0.19115	0.14363	0.590622
			0.236528	0.529996	0.610227		0.191262	0.14366	0.59068
			0.236667	0.530091	0.610278		0.191375	0.143664	0.590938
			0.236806	0.530653	0.610521		0.191487	0.143858	0.590939
			0.236944	0.530717	0.610801		0.191599	0.143859	0.591105
			0.237083	0.531561	0.611104		0.191712	0.143949	0.591174
			0.237222	0.531581	0.61123		0.191824	0.144035	0.591181
			0.237361	0.531657	0.611307		0.191936	0.144048	0.591184
			0.2375	0.531706	0.611315		0.192049	0.144089	0.591278
			0.237639	0.532147	0.611452		0.192161	0.144124	0.591357
			0.237778	0.532239	0.611571		0.192273	0.144215	0.591401
			0.237917	0.532337	0.611681		0.192385	0.144228	0.591489
			0.238056	0.532704	0.612476		0.192498	0.144309	0.591513
			0.238194	0.532713	0.612538		0.19261	0.144366	0.591825
			0.238333	0.53317	0.612619		0.192722	0.144463	0.591937
			0.238472	0.533466	0.61277		0.192835	0.144528	0.592142
			0.238611	0.53392	0.61282		0.192947	0.144571	0.592379
			0.23875	0.534064	0.612877		0.193059	0.144584	0.592515
			0.238889	0.534068	0.612984		0.193172	0.144613	0.592607
			0.239028	0.534082	0.613081		0.193284	0.144646	0.593493
			0.239167	0.534686	0.613099		0.193396	0.144648	0.59355
			0.239306	0.534794	0.613207		0.193509	0.144745	0.593944
			0.239444	0.534996	0.613256		0.193621	0.144758	0.594046
			0.239583	0.535139	0.613271		0.193733	0.144794	0.5942
			0.239722	0.535398	0.613398		0.193845	0.144807	0.594463
			0.239861	0.535803	0.613522		0.193958	0.14483	0.594519
			0.24	0.535865	0.613613		0.19407	0.144836	0.594664
			0.240139	0.536537	0.613616		0.194182	0.14493	0.595213
			0.240278	0.536833	0.613671		0.194295	0.145035	0.595657
			0.240417	0.536837	0.613717		0.194407	0.145062	0.596163
			0.240556	0.537018	0.613829		0.194519	0.14511	0.596255
			0.240694	0.537036	0.614021		0.194632	0.145124	0.59628
			0.240833	0.537945	0.614089		0.194744	0.14533	0.596339
			0.240972	0.537953	0.614187		0.194856	0.145355	0.59639
			0.241111	0.538233	0.614224		0.194969	0.145363	0.596466
			0.24125	0.538271	0.614369		0.195081	0.14544	0.596528
			0.241389	0.538624	0.615096		0.195193	0.145506	0.596553
			0.241528	0.538652	0.615167		0.195305	0.145811	0.596894
			0.241667	0.53872	0.615299		0.195418	0.145835	0.597037
			0.241806	0.538928	0.615337		0.19553	0.145919	0.597367
			0.241944	0.538961	0.615353		0.195642	0.145924	0.59749
			0.242083	0.538988	0.615654		0.195755	0.146056	0.597498
			0.242222	0.539175	0.61567		0.195867	0.146088	0.597624
			0.242361	0.539246	0.615856		0.195979	0.146174	0.597762
			0.2425	0.539471	0.615988		0.196092	0.146179	0.598133
			0.242639	0.539842	0.616306		0.196204	0.146381	0.5986
			0.242778	0.539844	0.616356		0.196316	0.146383	0.598726
			0.242917	0.539909	0.61732		0.196429	0.14639	0.599092
			0.243056	0.539969	0.617358		0.196541	0.14654	0.599146
			0.243194	0.540086	0.617616		0.196653	0.146583	0.599693
			0.243333	0.540445	0.618017		0.196765	0.146657	0.600049
			0.243472	0.540563	0.618034		0.196878	0.146795	0.600103
			0.243611	0.540625	0.618119		0.19699	0.146799	0.600133
			0.24375	0.540663	0.618204		0.197102	0.146903	0.600264
			0.243889	0.540676	0.61829		0.197215	0.147017	0.60027
			0.244028	0.541029	0.618431		0.197327	0.147037	0.600312
			0.244167	0.541534	0.618657		0.197439	0.147079	0.600365
			0.244306	0.54157	0.618809		0.197552	0.147201	0.600392
			0.244444	0.541596	0.619046		0.197664	0.147264	0.600613
			0.244583	0.541985	0.619062		0.197776	0.147384	0.600825
			0.244722	0.542826	0.619202		0.197889	0.147456	0.600903
			0.244861	0.543136	0.619273		0.198001	0.147614	0.601076
			0.245	0.543272	0.619373		0.198113	0.147694	0.601145
			0.245139	0.543375	0.619451		0.198226	0.148083	0.601242
			0.245278	0.543577	0.619666		0.198338	0.148093	0.601337
			0.245417	0.544072	0.620473		0.19845	0.148114	0.601355
			0.245556	0.544403	0.620734		0.198562	0.148194	0.601481
			0.245694	0.544423	0.620801		0.198675	0.148451	0.601528
			0.245833	0.544588	0.620915		0.198787	0.148464	0.601534
			0.245972	0.545377	0.62116		0.198899	0.148542	0.601573
			0.246111	0.545495	0.621285		0.199012	0.148543	0.601586
			0.24625	0.546066	0.621312		0.199124	0.14861	0.601614
			0.246389	0.546095	0.621413		0.199236	0.14862	0.601621
			0.246528	0.546098	0.62157		0.199349	0.148679	0.601624
			0.246667	0.546402	0.621702		0.199461	0.14874	0.601692
			0.246806	0.546717	0.621825		0.199573	0.148821	0.601918
			0.246944	0.546745	0.621842		0.199686	0.148847	0.602005
			0.247083	0.547359	0.622061		0.199798	0.148847	0.602114
			0.247222	0.54747	0.622174		0.19991	0.148863	0.602209
			0.247361	0.547739	0.622184		0.200022	0.148868	0.602233
			0.2475	0.547763	0.62232		0.200135	0.149059	0.602345
			0.247639	0.547968	0.622446		0.200247	0.149068	0.602626
			0.247778	0.54806	0.622621		0.200359	0.149095	0.603148
			0.247917	0.548071	0.622981		0.200472	0.149132	0.603296
			0.248056	0.548598	0.62396		0.200584	0.149209	0.603483
			0.248194	0.548878	0.624019		0.200696	0.149261	0.603607
			0.248333	0.548905	0.625036		0.200809	0.149274	0.603894
			0.248472	0.549021	0.625045		0.200921	0.149414	0.603913
			0.248611	0.549031	0.625057		0.201033	0.149442	0.603976
			0.24875	0.549354	0.625188		0.201146	0.14958	0.604115
			0.248889	0.549374	0.625365		0.201258	0.149625	0.604221
			0.249028	0.549456	0.625393		0.20137	0.149672	0.604389
			0.249167	0.549783	0.625472		0.201482	0.149815	0.604395
			0.249306	0.549875	0.625576		0.201595	0.14992	0.604433
			0.249444	0.550007	0.625791		0.201707	0.150019	0.604441
			0.249583	0.55034	0.625918		0.201819	0.150026	0.60458
			0.249722	0.550743	0.626112		0.201932	0.150049	0.604598
			0.249861	0.550996	0.626226		0.202044	0.15015	0.604631
			0.25	0.551145	0.626529		0.202156	0.150168	0.604676
			0.250139	0.551229	0.626612		0.202269	0.150366	0.605057
			0.250278	0.552061	0.626746		0.202381	0.150419	0.605409
			0.250417	0.552172	0.626905		0.202493	0.150456	0.605667
			0.250556	0.554075	0.626911		0.202606	0.150464	0.605669
			0.250694	0.554113	0.627371		0.202718	0.150505	0.605839
			0.250833	0.554151	0.627549		0.20283	0.150574	0.606033
			0.250972	0.554151	0.627678		0.202942	0.150601	0.60614
			0.251111	0.55444	0.62768		0.203055	0.150625	0.606179
			0.25125	0.554635	0.62771		0.203167	0.150659	0.60642
			0.251389	0.554889	0.627741		0.203279	0.150719	0.606534
			0.251528	0.554937	0.627752		0.203392	0.150779	0.606609
			0.251667	0.554951	0.627847		0.203504	0.150788	0.606679
			0.251806	0.555076	0.628386		0.203616	0.150834	0.606763
			0.251944	0.555433	0.628649		0.203729	0.15087	0.606791
			0.252083	0.555447	0.628896		0.203841	0.151325	0.606828
			0.252222	0.5559	0.629261		0.203953	0.151446	0.607009
			0.252361	0.556411	0.629451		0.204066	0.151579	0.607199
			0.2525	0.556709	0.629615		0.204178	0.151618	0.607236
			0.252639	0.55737	0.629705		0.20429	0.15162	0.607387
			0.252778	0.557607	0.629725		0.204403	0.151669	0.607427
			0.252917	0.557639	0.629756		0.204515	0.151673	0.607476
			0.253056	0.557662	0.63005		0.204627	0.151679	0.607531
			0.253194	0.558161	0.630442		0.204739	0.151697	0.607565
			0.253333	0.558223	0.63051		0.204852	0.151812	0.607671
			0.253472	0.558746	0.630959		0.204964	0.151864	0.607884
			0.253611	0.559261	0.631572		0.205076	0.151875	0.607915
			0.25375	0.559447	0.63165		0.205189	0.151909	0.608074
			0.253889	0.559515	0.632011		0.205301	0.151961	0.608093
			0.254028	0.55954	0.632054		0.205413	0.151985	0.608103
			0.254167	0.559722	0.632118		0.205526	0.152004	0.608163
			0.254306	0.559861	0.632171		0.205638	0.152013	0.608386
			0.254444	0.560146	0.63261		0.20575	0.15202	0.608494
			0.254583	0.560372	0.633237		0.205863	0.152191	0.60856
			0.254722	0.560702	0.633247		0.205975	0.152214	0.609138
			0.254861	0.560709	0.633393		0.206087	0.152216	0.609401
			0.255	0.560955	0.633402		0.206199	0.152328	0.609684
			0.255139	0.561058	0.633546		0.206312	0.152405	0.609714
			0.255278	0.561142	0.633669		0.206424	0.152411	0.60988
			0.255417	0.561822	0.633696		0.206536	0.152416	0.610517
			0.255556	0.562075	0.633858		0.206649	0.152676	0.610527
			0.255694	0.56209	0.634324		0.206761	0.152791	0.610696
			0.255833	0.562237	0.634333		0.206873	0.152913	0.610842
			0.255972	0.562332	0.634366		0.206986	0.152951	0.610889
			0.256111	0.562464	0.634427		0.207098	0.153049	0.611174
			0.25625	0.562485	0.634464		0.20721	0.153096	0.611531
			0.256389	0.562925	0.634896		0.207323	0.153097	0.611645
			0.256528	0.562966	0.634923		0.207435	0.15313	0.611986
			0.256667	0.563358	0.634938		0.207547	0.153181	0.612475
			0.256806	0.563739	0.634986		0.207659	0.153242	0.612517
			0.256944	0.564103	0.635105		0.207772	0.153405	0.612619
			0.257083	0.56411	0.635147		0.207884	0.153412	0.61276
			0.257222	0.564308	0.635385		0.207996	0.153459	0.613106
			0.257361	0.564428	0.635438		0.208109	0.153522	0.61322
			0.2575	0.564898	0.635619		0.208221	0.153552	0.613414
			0.257639	0.564974	0.635953		0.208333	0.153602	0.613521
			0.257778	0.565105	0.635987		0.208446	0.153628	0.613552
			0.257917	0.565551	0.63618		0.208558	0.153787	0.613648
			0.258056	0.565609	0.636283		0.20867	0.153828	0.613735
			0.258194	0.56575	0.63632		0.208783	0.153871	0.613743
			0.258333	0.565867	0.636363		0.208895	0.153933	0.614075
			0.258472	0.565882	0.636406		0.209007	0.153933	0.614182
			0.258611	0.565973	0.636421		0.209119	0.154015	0.61428
			0.25875	0.566309	0.636658		0.209232	0.154038	0.614351
			0.258889	0.566331	0.636732		0.209344	0.154094	0.614564
			0.259028	0.566385	0.636762		0.209456	0.154105	0.614626
			0.259167	0.567041	0.636786		0.209569	0.154188	0.614956
			0.259306	0.56729	0.636867		0.209681	0.154197	0.615068
			0.259444	0.567403	0.63698		0.209793	0.154201	0.615068
			0.259583	0.567511	0.637421		0.209906	0.15427	0.615144
			0.259722	0.567558	0.63775		0.210018	0.154274	0.615237
			0.259861	0.567653	0.637896		0.21013	0.154301	0.615267
			0.26	0.567671	0.638356		0.210243	0.154368	0.615333
			0.260139	0.568121	0.638518		0.210355	0.154373	0.615484
			0.260278	0.568201	0.638577		0.210467	0.154414	0.615497
			0.260417	0.56826	0.638607		0.21058	0.154592	0.615536
			0.260556	0.568262	0.638647		0.210692	0.154693	0.615682
			0.260694	0.568278	0.639329		0.210804	0.154813	0.615861
			0.260833	0.568446	0.639853		0.210916	0.154862	0.615905
			0.260972	0.56863	0.639903		0.211029	0.154934	0.616505
			0.261111	0.568929	0.640298		0.211141	0.154951	0.616561
			0.26125	0.569086	0.640419		0.211253	0.155106	0.616586
			0.261389	0.569163	0.64099		0.211366	0.155119	0.616712
			0.261528	0.569639	0.641006		0.211478	0.155128	0.616791
			0.261667	0.569969	0.641022		0.21159	0.155165	0.616976
			0.261806	0.569973	0.6411		0.211703	0.155169	0.617293
			0.261944	0.570291	0.642045		0.211815	0.15517	0.617384
			0.262083	0.570756	0.642231		0.211927	0.155207	0.617489
			0.262222	0.570988	0.642673		0.21204	0.155207	0.617491
			0.262361	0.57121	0.643106		0.212152	0.15522	0.617647
			0.2625	0.571532	0.64352		0.212264	0.155297	0.617763
			0.262639	0.571614	0.643739		0.212376	0.155409	0.61782
			0.262778	0.571726	0.643868		0.212489	0.155429	0.618063
			0.262917	0.572306	0.644501		0.212601	0.1555	0.618428
			0.263056	0.572366	0.644713		0.212713	0.155512	0.618705
			0.263194	0.572652	0.644748		0.212826	0.15552	0.619109
			0.263333	0.572869	0.64477		0.212938	0.15555	0.619124
			0.263472	0.573318	0.645573		0.21305	0.155606	0.61966
			0.263611	0.573401	0.645604		0.213163	0.155733	0.619686
			0.26375	0.574641	0.645798		0.213275	0.155922	0.619819
			0.263889	0.574777	0.645948		0.213387	0.156126	0.619861
			0.264028	0.574942	0.646289		0.2135	0.156137	0.619899
			0.264167	0.574955	0.646507		0.213612	0.156163	0.620092
			0.264306	0.575235	0.64679		0.213724	0.156167	0.620452
			0.264444	0.575235	0.646856		0.213836	0.156266	0.62046
			0.264583	0.575365	0.647183		0.213949	0.156323	0.62086
			0.264722	0.57573	0.64764		0.214061	0.156464	0.621084
			0.264861	0.575745	0.647924		0.214173	0.156474	0.621384
			0.265	0.576134	0.647993		0.214286	0.156502	0.621416
			0.265139	0.576141	0.648197		0.214398	0.156639	0.621509
			0.265278	0.576764	0.648262		0.21451	0.156668	0.621629
			0.265417	0.577217	0.648369		0.214623	0.156716	0.621675
			0.265556	0.578035	0.64868		0.214735	0.156717	0.621802
			0.265694	0.578073	0.648954		0.214847	0.156719	0.622025
			0.265833	0.578165	0.649198		0.21496	0.156735	0.622162
			0.265972	0.578283	0.649382		0.215072	0.156786	0.622756
			0.266111	0.578371	0.649566		0.215184	0.156789	0.622898
			0.26625	0.579174	0.649582		0.215296	0.156849	0.622909
			0.266389	0.579247	0.649696		0.215409	0.156947	0.623044
			0.266528	0.579485	0.649762		0.215521	0.157033	0.62313
			0.266667	0.579549	0.649787		0.215633	0.157081	0.623399
			0.266806	0.580442	0.649841		0.215746	0.157341	0.623478
			0.266944	0.580719	0.649843		0.215858	0.15753	0.623505
			0.267083	0.581054	0.650119		0.21597	0.157538	0.623803
			0.267222	0.581604	0.650194		0.216083	0.157567	0.624009
			0.267361	0.581684	0.650676		0.216195	0.157611	0.624036
			0.2675	0.581758	0.650689		0.216307	0.157665	0.624172
			0.267639	0.581783	0.650748		0.21642	0.157743	0.624473
			0.267778	0.582732	0.650808		0.216532	0.157823	0.624544
			0.267917	0.582901	0.650945		0.216644	0.158037	0.625073
			0.268056	0.583483	0.651065		0.216757	0.158145	0.625248
			0.268194	0.583594	0.651172		0.216869	0.158417	0.625435
			0.268333	0.583604	0.651443		0.216981	0.158485	0.625839
			0.268472	0.58364	0.651556		0.217093	0.158494	0.625849
			0.268611	0.583755	0.651621		0.217206	0.158515	0.625935
			0.26875	0.58376	0.65164		0.217318	0.15852	0.625938
			0.268889	0.583927	0.652547		0.21743	0.158587	0.626
			0.269028	0.58393	0.652612		0.217543	0.158669	0.626054
			0.269167	0.584006	0.652677		0.217655	0.158693	0.62623
			0.269306	0.584132	0.652999		0.217767	0.158713	0.626477
			0.269444	0.58421	0.653046		0.21788	0.158867	0.626584
			0.269583	0.584402	0.653976		0.217992	0.158999	0.626668
			0.269722	0.584566	0.653997		0.218104	0.159108	0.626912
			0.269861	0.584582	0.654147		0.218217	0.159119	0.627152
			0.27	0.584857	0.654382		0.218329	0.159155	0.627345
			0.270139	0.584919	0.65444		0.218441	0.159165	0.62779
			0.270278	0.585577	0.65451		0.218553	0.159277	0.627907
			0.270417	0.58608	0.654867		0.218666	0.159306	0.627956
			0.270556	0.586265	0.655516		0.218778	0.159339	0.6281
			0.270694	0.586613	0.65552		0.21889	0.159406	0.628209
			0.270833	0.586654	0.655539		0.219003	0.159499	0.62859
			0.270972	0.587247	0.655685		0.219115	0.159615	0.628916
			0.271111	0.587322	0.655864		0.219227	0.159717	0.62916
			0.27125	0.587611	0.65596		0.21934	0.159719	0.629319
			0.271389	0.587722	0.656244		0.219452	0.159859	0.629369
			0.271528	0.587972	0.65636		0.219564	0.159899	0.629382
			0.271667	0.588627	0.656605		0.219677	0.159906	0.629437
			0.271806	0.588724	0.656776		0.219789	0.15995	0.629526
			0.271944	0.588992	0.656846		0.219901	0.160036	0.629539
			0.272083	0.589163	0.657224		0.220013	0.160093	0.629712
			0.272222	0.589714	0.657407		0.220126	0.160126	0.629983
			0.272361	0.589816	0.657695		0.220238	0.160421	0.630162
			0.2725	0.590365	0.658455		0.22035	0.160605	0.630479
			0.272639	0.59105	0.65856		0.220463	0.160788	0.630493
			0.272778	0.591375	0.658702		0.220575	0.160946	0.630971
			0.272917	0.591461	0.658717		0.220687	0.16096	0.631111
			0.273056	0.591758	0.658956		0.2208	0.160967	0.631527
			0.273194	0.591763	0.659286		0.220912	0.161285	0.631858
			0.273333	0.591801	0.659753		0.221024	0.161331	0.632178
			0.273472	0.591886	0.65981		0.221137	0.161501	0.632183
			0.273611	0.592134	0.659922		0.221249	0.161529	0.632407
			0.27375	0.592288	0.660016		0.221361	0.161594	0.633164
			0.273889	0.592668	0.660392		0.221473	0.161613	0.633418
			0.274028	0.592742	0.660421		0.221586	0.16166	0.633764
			0.274167	0.593382	0.661169		0.221698	0.161811	0.633798
			0.274306	0.593814	0.661415		0.22181	0.161828	0.633904
			0.274444	0.593857	0.661433		0.221923	0.161828	0.634247
			0.274583	0.594057	0.661882		0.222035	0.16184	0.634491
			0.274722	0.594066	0.66204		0.222147	0.161846	0.634737
			0.274861	0.594476	0.66207		0.22226	0.161986	0.634905
			0.275	0.594491	0.662524		0.222372	0.161995	0.634952
			0.275139	0.59451	0.662643		0.222484	0.162014	0.634981
			0.275278	0.594931	0.662819		0.222597	0.162017	0.635096
			0.275417	0.594975	0.663039		0.222709	0.162052	0.635215
			0.275556	0.595131	0.663094		0.222821	0.16209	0.635372
			0.275694	0.595509	0.663264		0.222934	0.16211	0.635456
			0.275833	0.59599	0.663341		0.223046	0.162162	0.635456
			0.275972	0.596089	0.663791		0.223158	0.162265	0.635516
			0.276111	0.596115	0.663872		0.22327	0.162278	0.635916
			0.27625	0.596492	0.663889		0.223383	0.162369	0.635931
			0.276389	0.596552	0.663895		0.223495	0.1624	0.636046
			0.276528	0.596692	0.663914		0.223607	0.162532	0.636237
			0.276667	0.596937	0.664003		0.22372	0.162585	0.636294
			0.276806	0.596955	0.664167		0.223832	0.16274	0.636384
			0.276944	0.597343	0.664343		0.223944	0.162819	0.636581
			0.277083	0.597659	0.664611		0.224057	0.162866	0.636891
[truncated: 6,909 more rows]

## Sheet: Panels F G
Frame	0	1	2	3		Norm	0	1	2	3			ttest	**
3858	1644.31	1928.4	1303.04	1815.23			85.2683	100	67.5713	94.1318			0.478856	0.00209625
3857	1269.79	1350.87	1213.45	1710.45			93.9985	100	89.8276	126.619			"total"	"surface loss"
3853	1862.2	1944.41	1565.42	1778.29			95.7719	100	80.5088	91.4569
3854	2382.73	2518.26	2057.04	2447.59			94.6182	100	81.685	97.1939
3855	2441.27	2713.82	2370.65	2817.17			89.9571	100	87.355	103.809
3856	1939.67	2071.27	1605.97	2050.36			93.6462	100	77.5355	98.9906
3841	1461.73	1540.55	1223.89	1617.09			94.8838	100	79.4447	104.968				Base	NH4-1	DADLE	NH4-2	Δ1/NH4-1	Δ2/NH4-1	Δ2/NH4-2		Base	NH4-1			DADLE	NH4-2
3842	1434.75	1552.37	1450.9	1601.85			92.4233	100	93.4638	103.188				92.6074	100	85.2234	101.683	7.39257	16.4593	15.9494		92.6074	100			85.2234	101.683
3843	1724.14	1889.98	1796.96	2005.2			91.2249	100	95.078	106.096				0.757502	0	2.03852	2.30781	0.757502	2.27136	1.94665		0.757502	0			2.03852	2.30781
3844	1679.9	1788.72	1537.65	1710.75			93.9162	100	85.9632	95.6409
3845	1158.91	1257.71	1062.14	1179.9			92.1441	100	84.45	93.8137
3833	1800.82	1975.71	1841.96	1969.35			91.148	100	93.2301	99.6778
3834	1518.08	1576.92	1466.12	1672.14			96.2689	100	92.9734	106.038
3835	1325.09	1452.4	1220.6	1480.49			91.2346	100	84.0407	101.935
n	14																				1
																					2
																					3
																					4
																					5
						Av	92.6074	100	85.2234	101.683											6
						sem	0.757502	0	2.03852	2.30781											7
																					8
																					9
		delta1/F1		delta2/F2				delta1/F1		delta2/F1											10
											ttest										11
3858		14.7317		28.2163	0.000685656		3858	14.7317		26.5605	0.00174359										12
3857		6.00155		29.0567			3857	6.00155		36.7913											13
3853		4.22806		11.9707			3853	4.22806		10.9481											14
3854		5.38175		15.9567			3854	5.38175		15.5089											15
3855		10.0429		15.8499			3855	10.0429		16.4535
3856		6.35379		21.6739			3856	6.35379		21.4551
3841		5.11622		24.3156			3841	5.11622		25.5237
3842		7.57673		9.42341			3842	7.57673		9.72379			0.5	1.5		1
3843		8.77507		10.3849			3843	8.77507		11.0179			14.7317	28.2163		2
3844		6.08381		10.1188			3844	6.08381		9.67772			6.00155	29.0567		3
3845		7.8559		9.98116			3845	7.8559		9.36369			4.22806	11.9707		4
3833		8.85199		6.46856			3833	8.85199		6.44771			5.38175	15.9567		5
3834		3.73111		12.3207			3834	3.73111		13.0646			10.0429	15.8499		6
3835		8.76542		17.5543			3835	8.76542		17.8939			6.35379	21.6739		7
													5.11622	24.3156		8
		7.39257		15.9494				7.39257		16.4593			7.57673	9.42341		9
		0.757502		1.94665				0.757502		2.27136			8.77507	10.3849		10
													6.08381	10.1188		11
													7.8559	9.98116		12
													8.85199	6.46856		13
													3.73111	12.3207		14
													8.76542	17.5543		15
